# Supplementary material for: A Markovian Entropy Measure for the Analysis of Calcium Activity Time Series
Source: PLoS One. 2016 Dec 15;11(12):e0168342. doi: 10.1371/journal.pone.0168342 (PMC5158058; doi:10.1371/journal.pone.0168342)

**Cell 1**

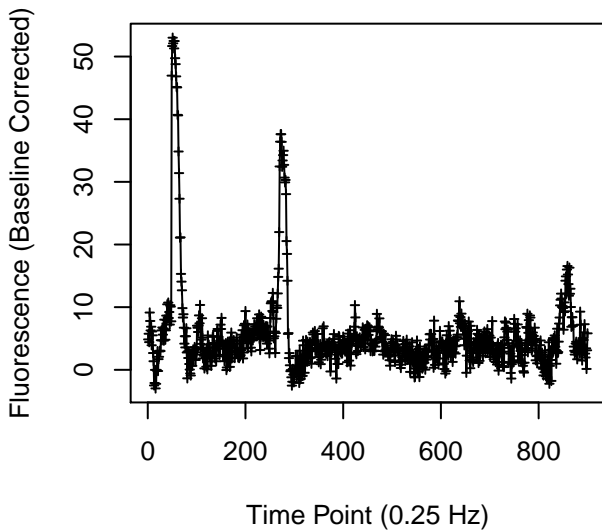

**Cell 2**

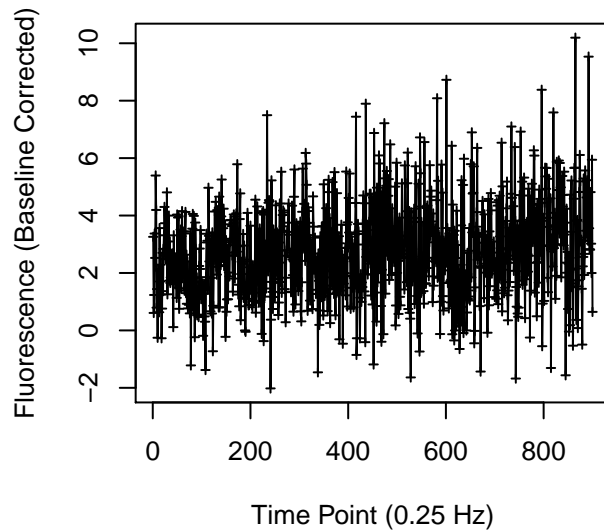

**Cell 3**

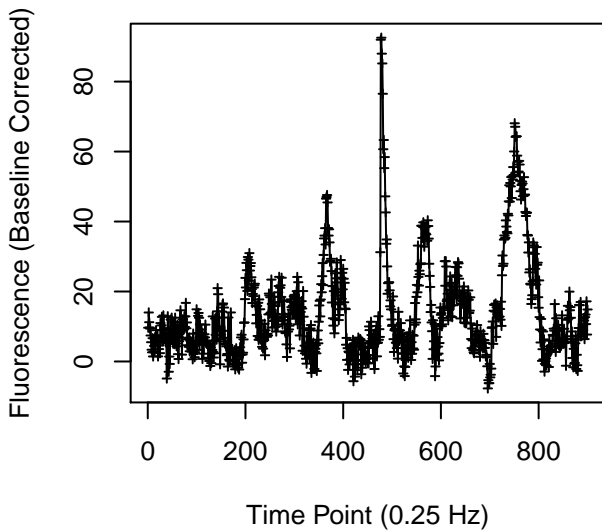

**Cell 4**

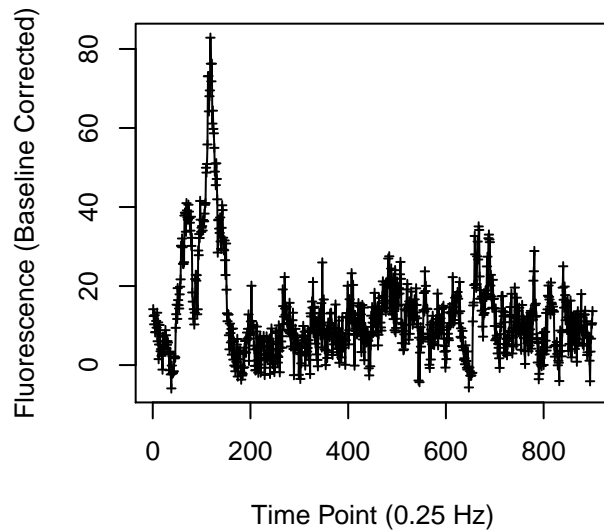

**Cell 5**

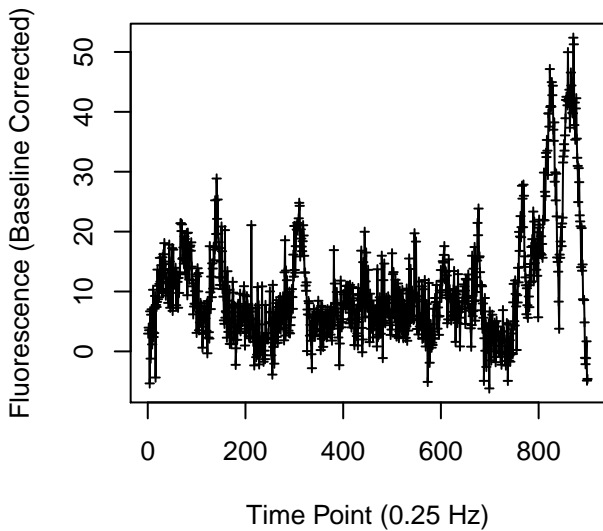

**Cell 6**

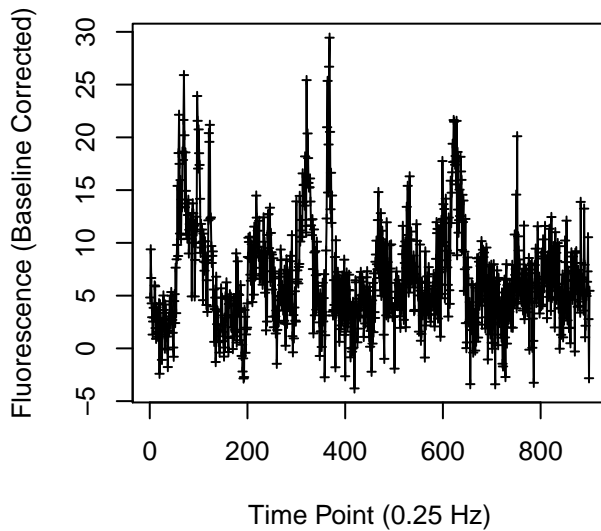

**Cell 7**

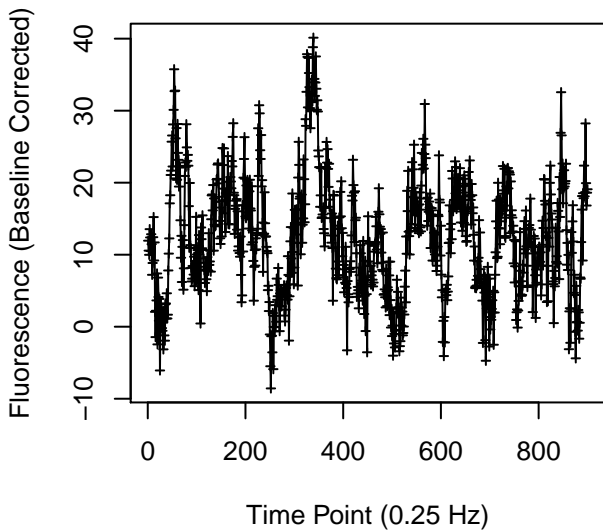

**Cell 8**

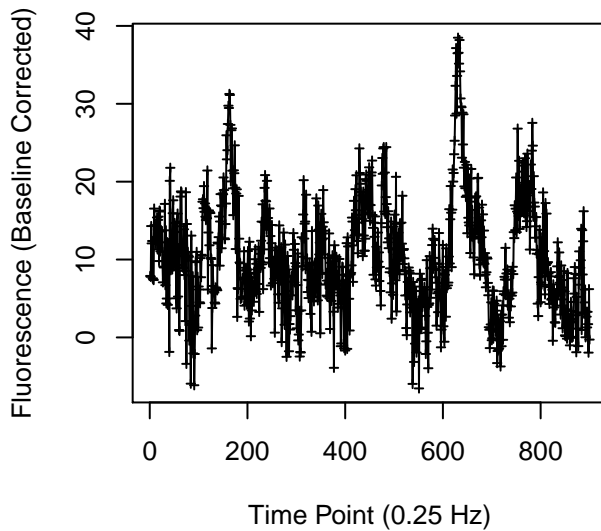

**Cell 9**

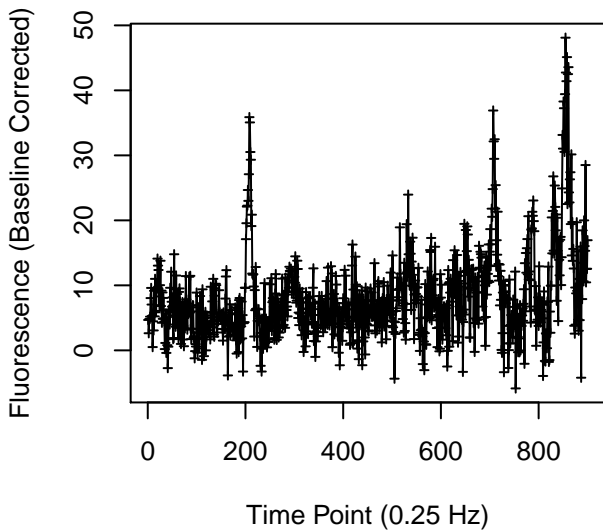

**Cell 10**

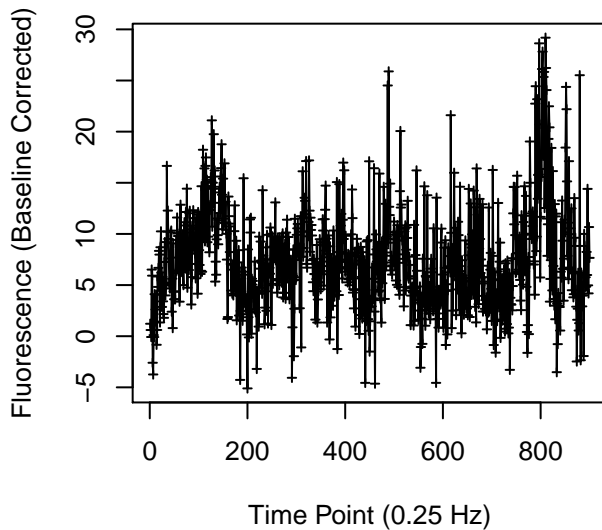

**Cell 11**

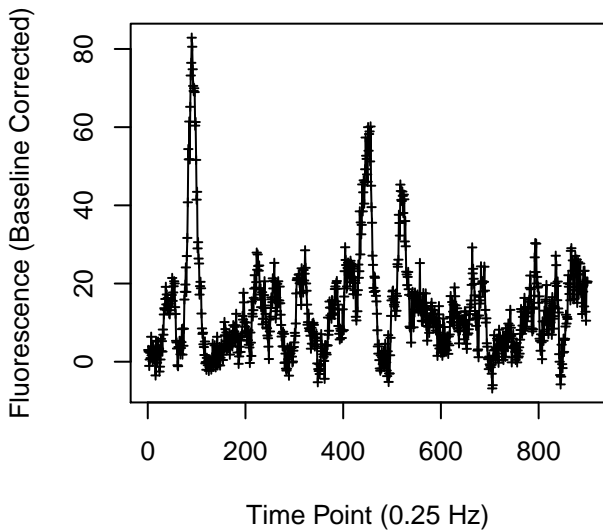

**Cell 12**

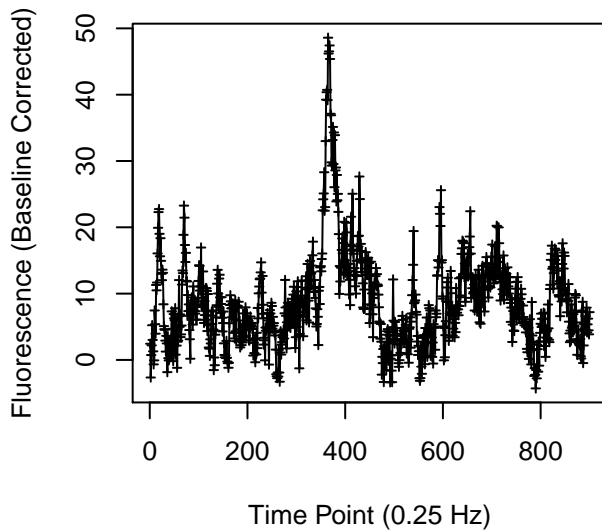

**Cell 13**

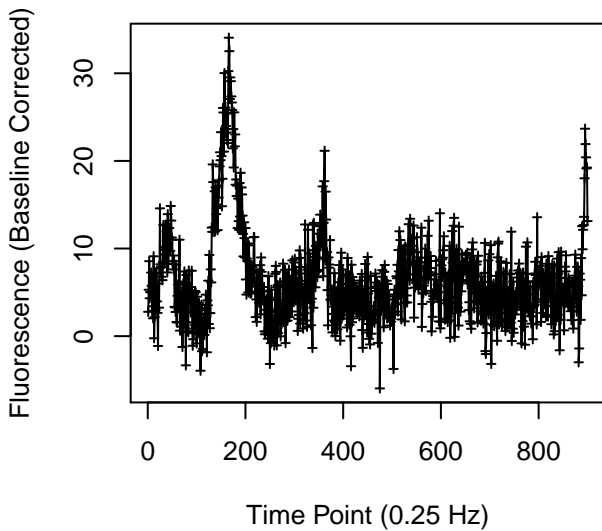

**Cell 14**

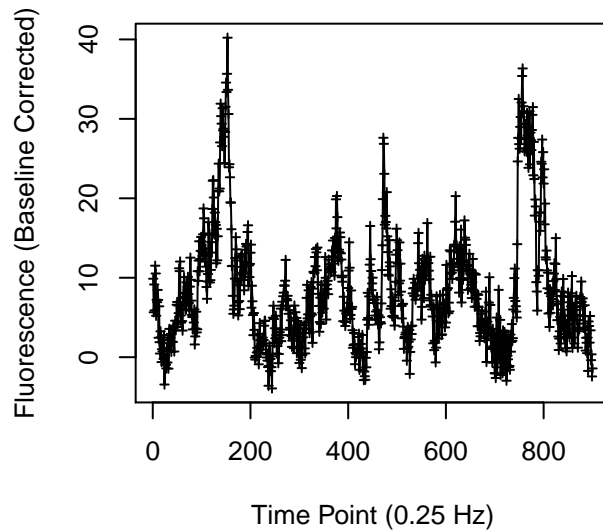

**Cell 15**

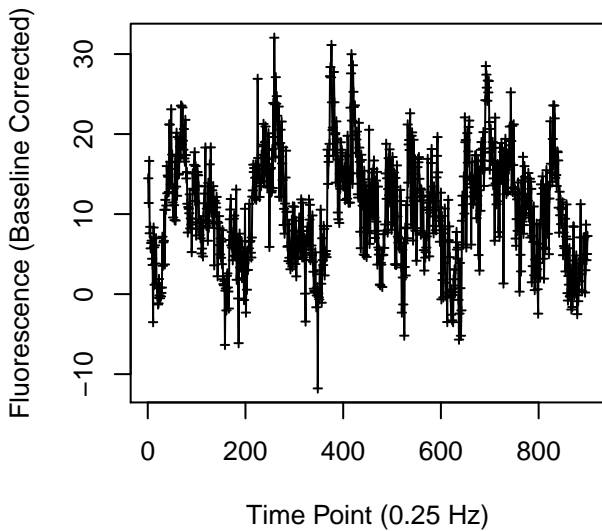

**Cell 16**

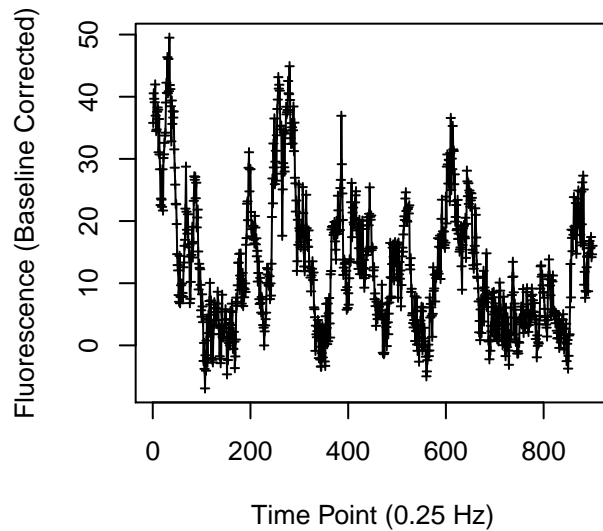

**Cell 17**

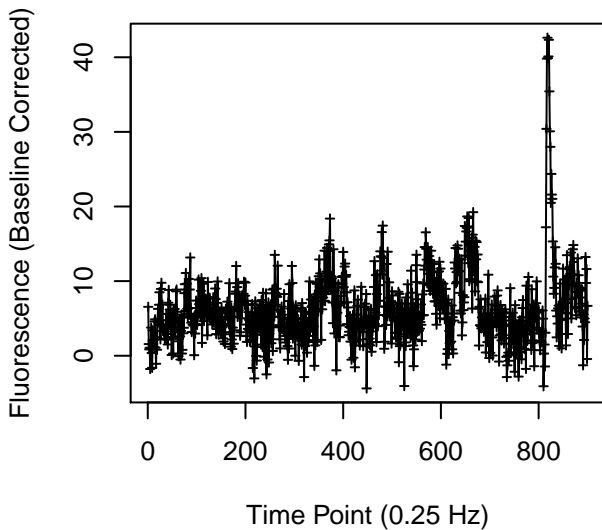

**Cell 18**

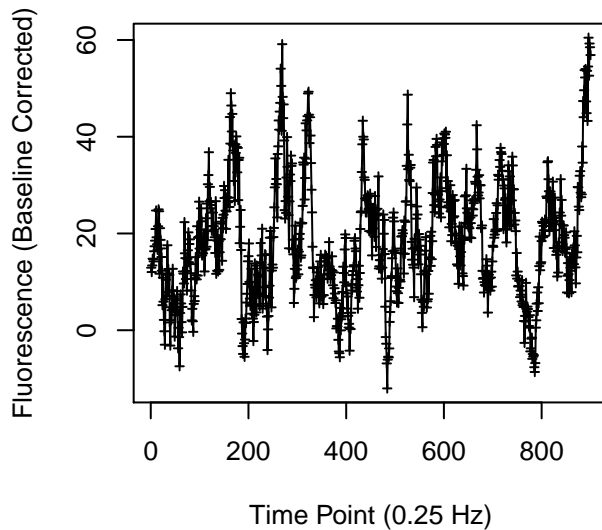

**Cell 19**

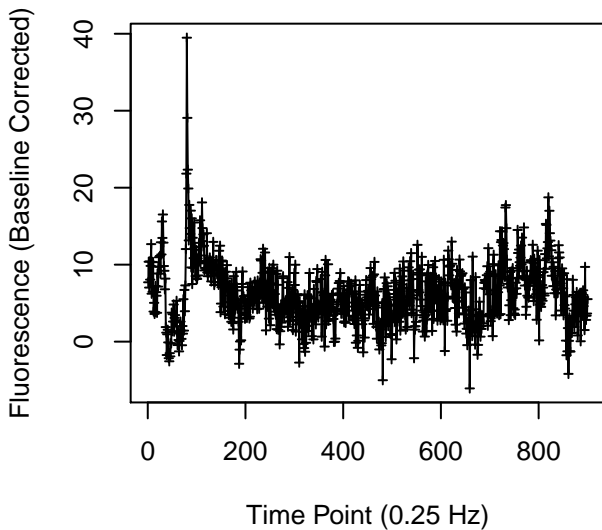

**Cell 20**

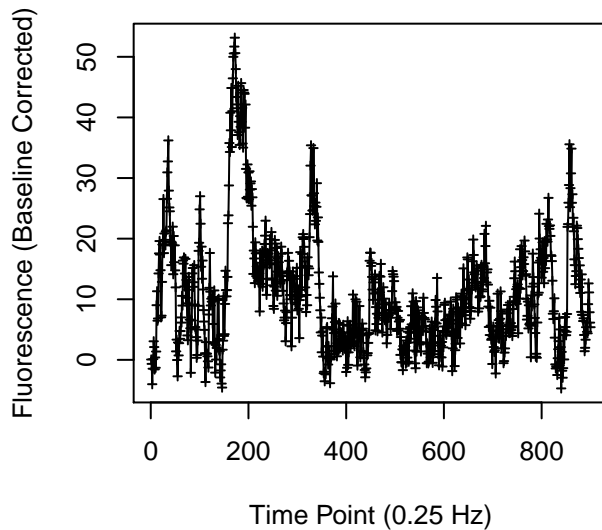

**Cell 21**

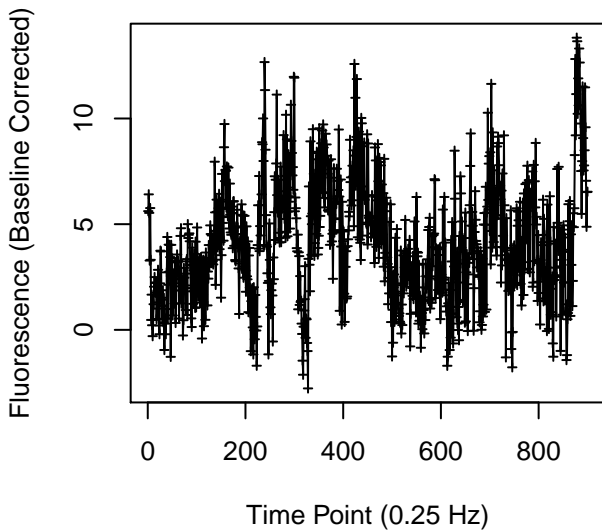

**Cell 22**

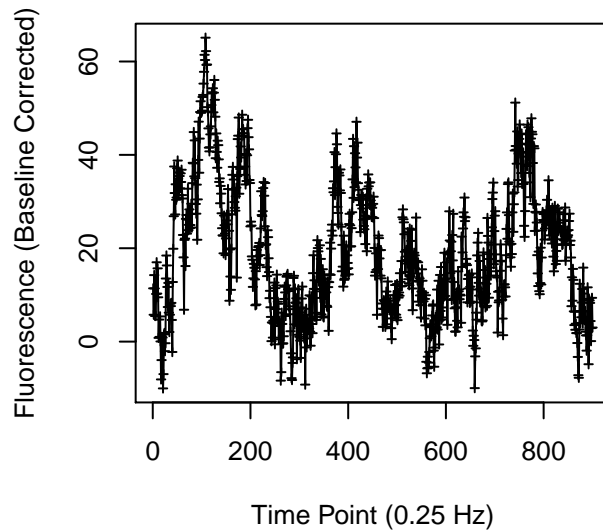

**Cell 23**

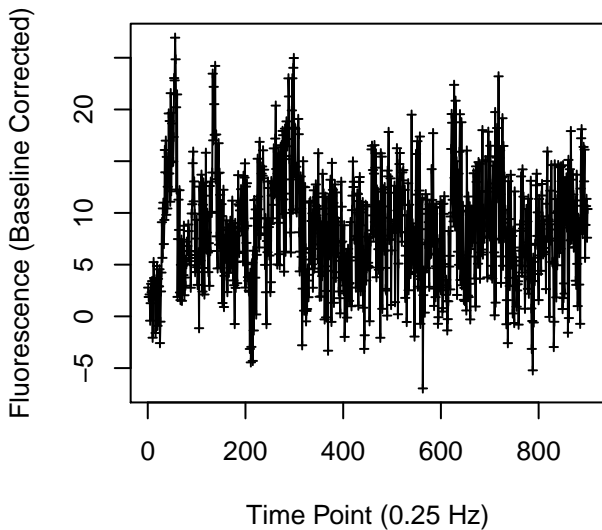

**Cell 24**

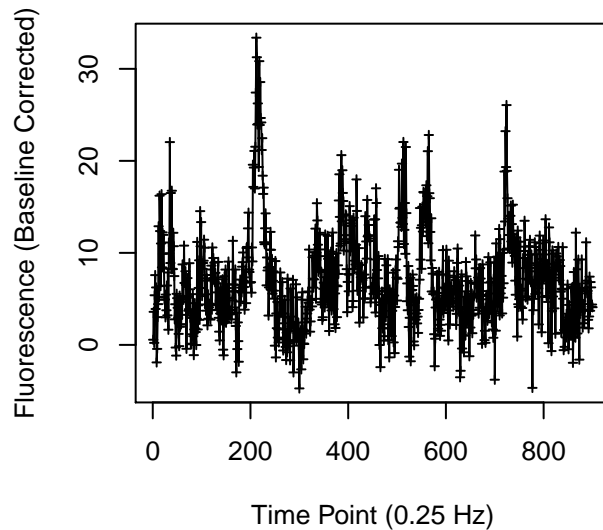

**Cell 25**

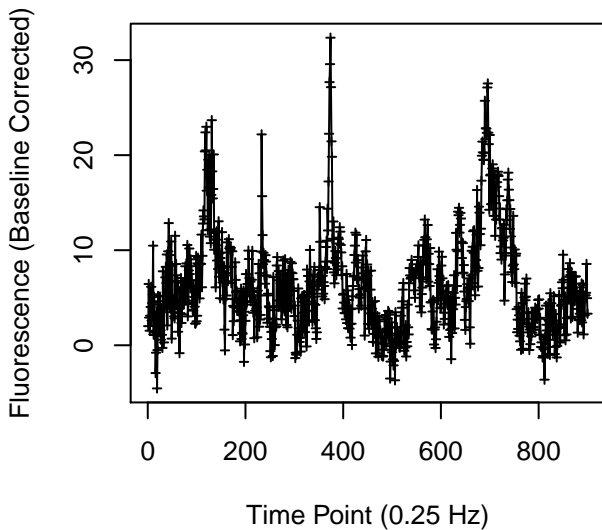

**Cell 26**

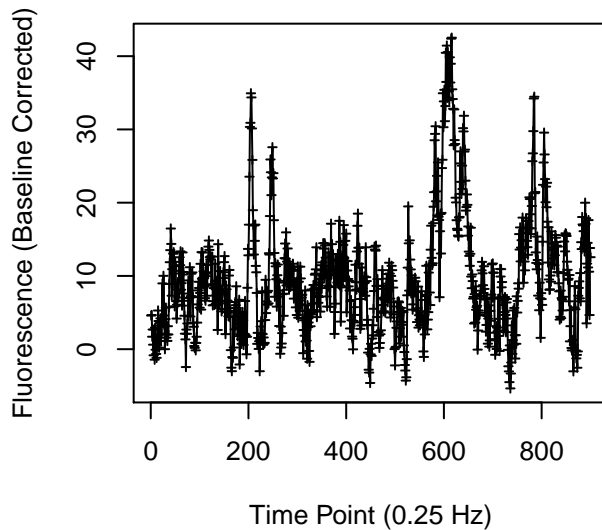

**Cell 27**

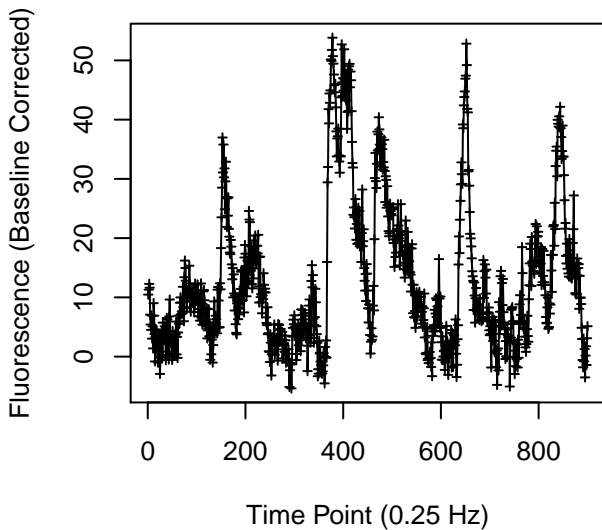

**Cell 28**

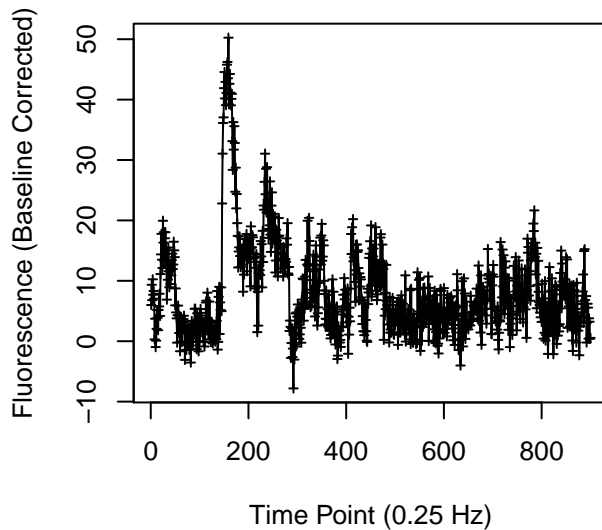

**Cell 29**

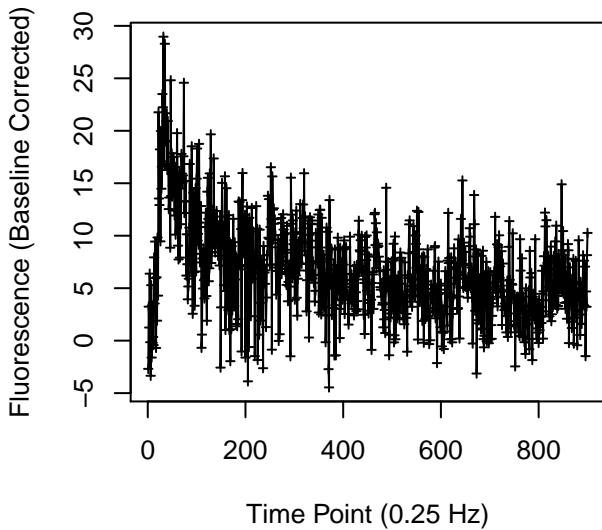

**Cell 30**

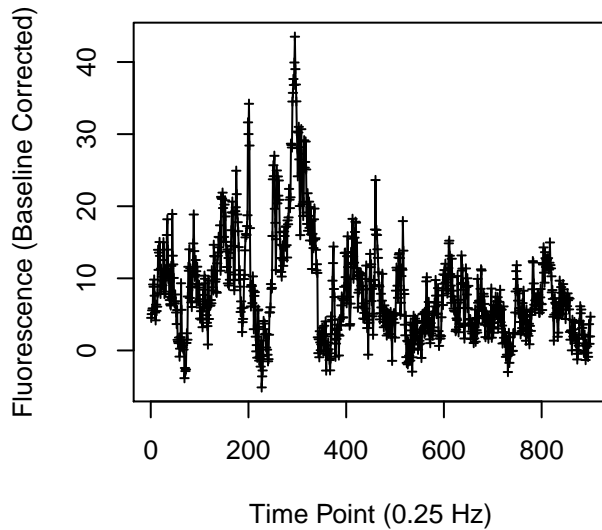

**Cell 31**

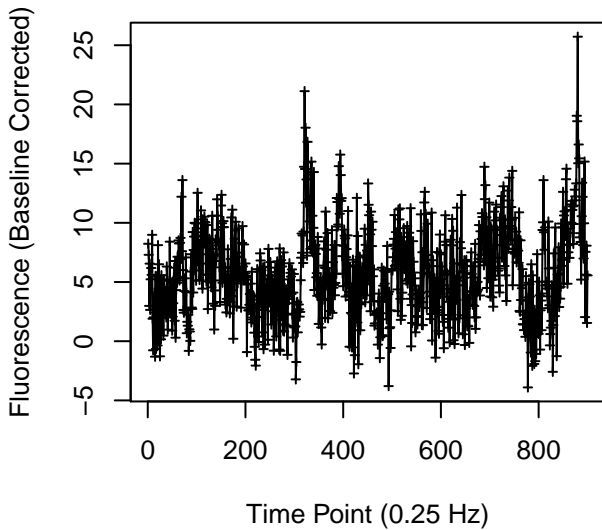

**Cell 32**

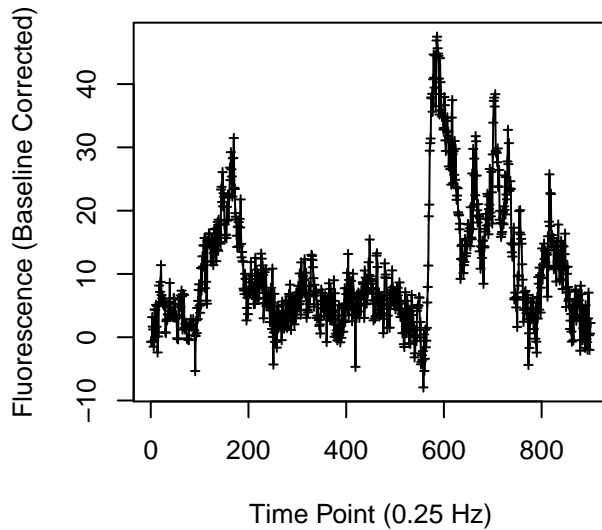

**Cell 33**

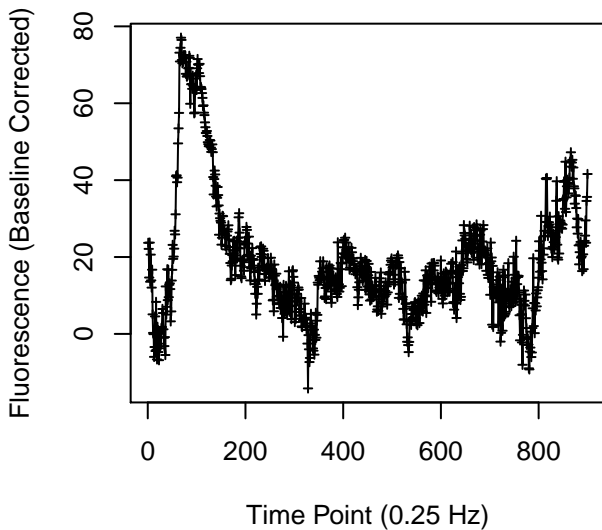

**Cell 34**

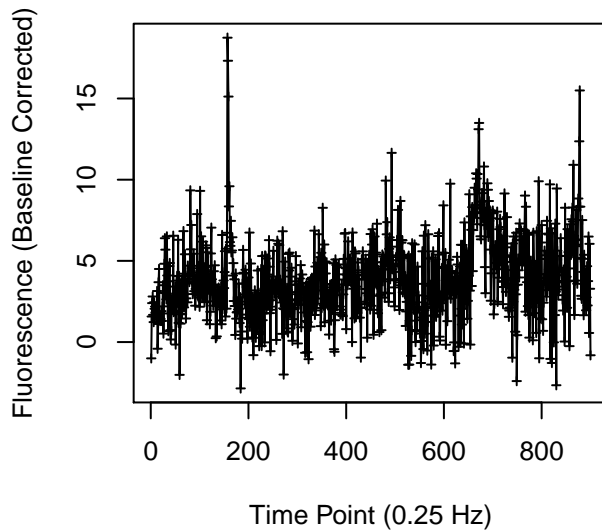

**Cell 35**

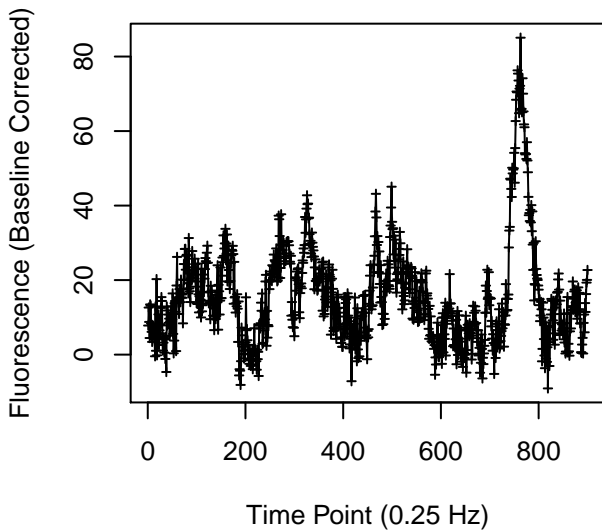

**Cell 36**

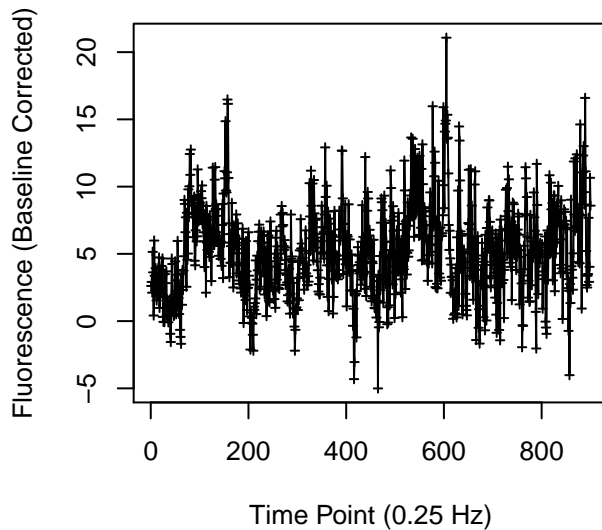

**Cell 37**

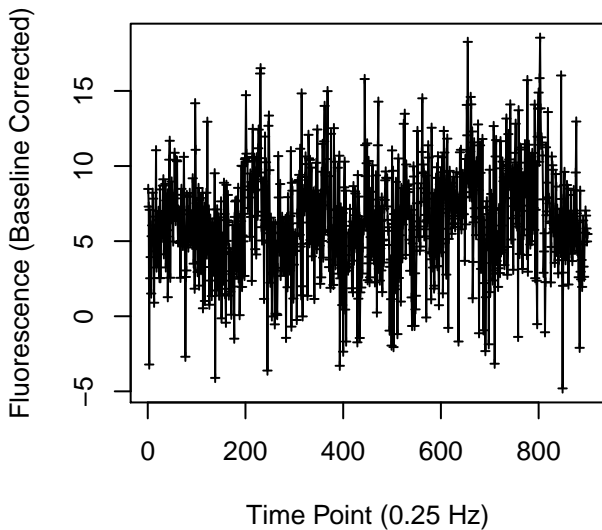

**Cell 38**

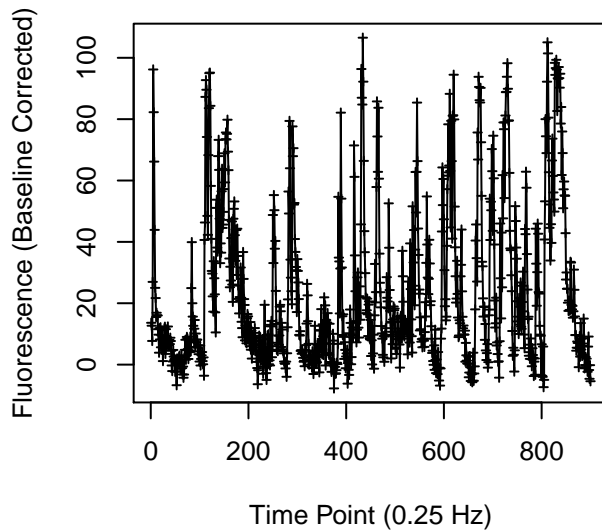

**Cell 39**

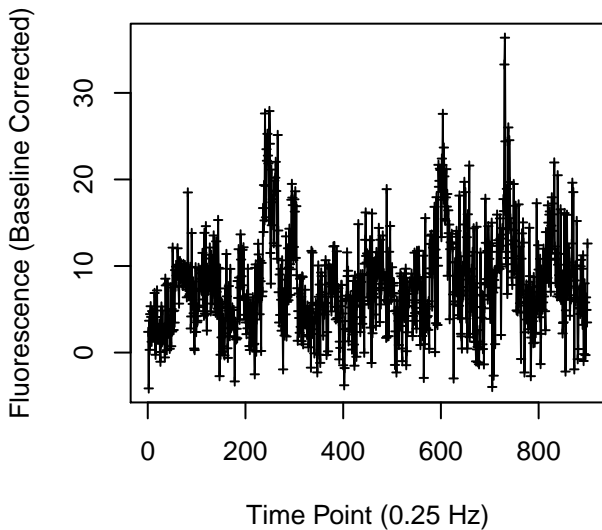

**Cell 40**

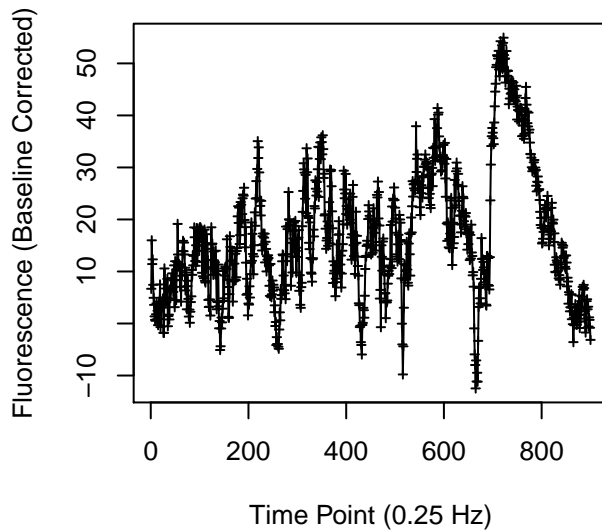

**Cell 41**

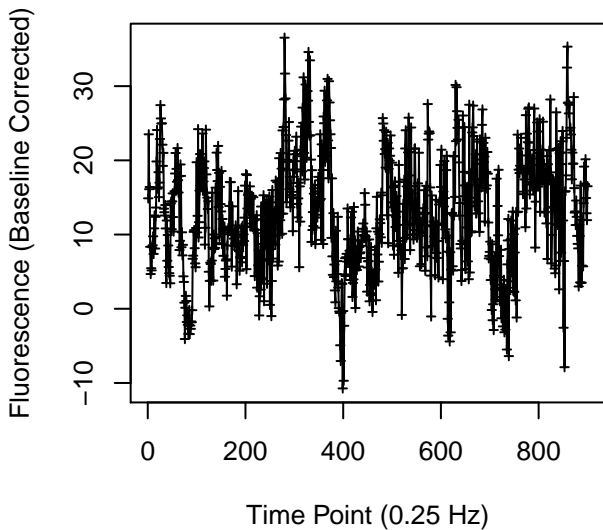

**Cell 42**

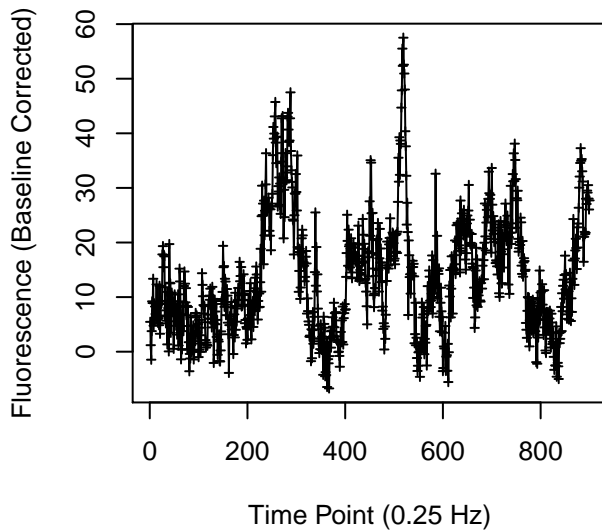

**Cell 43**

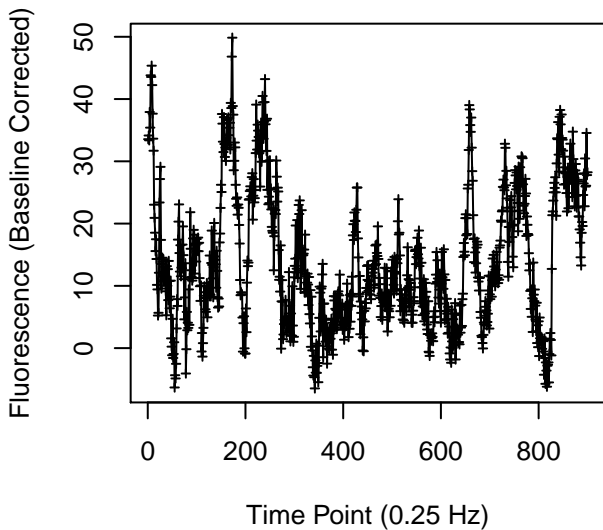

**Cell 44**

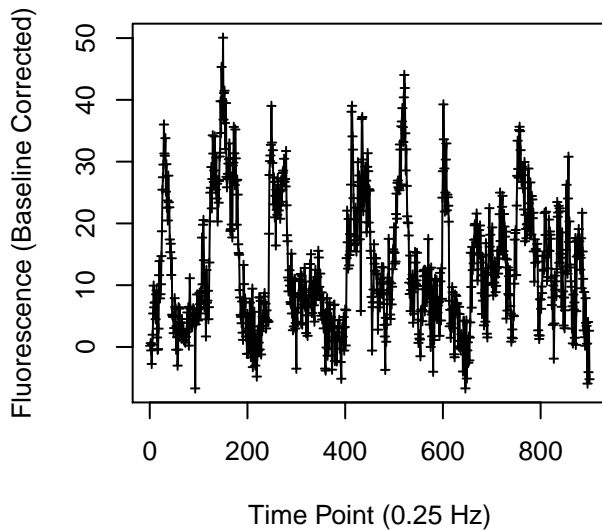

**Cell 45**

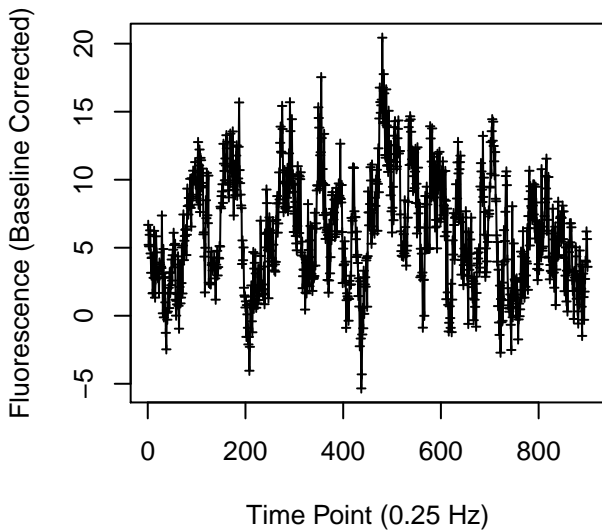

**Cell 46**

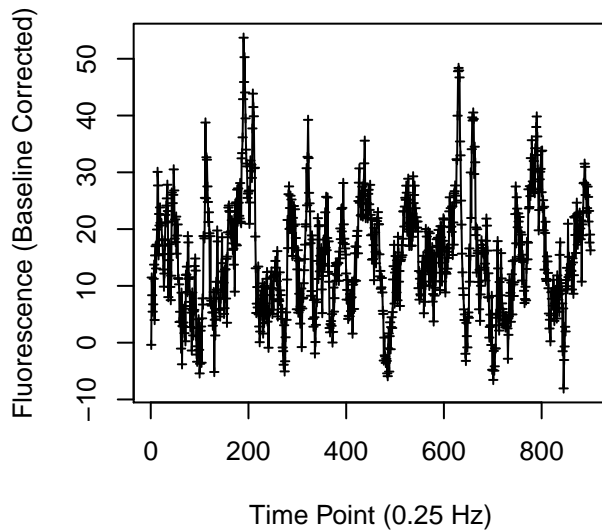

**Cell 47**

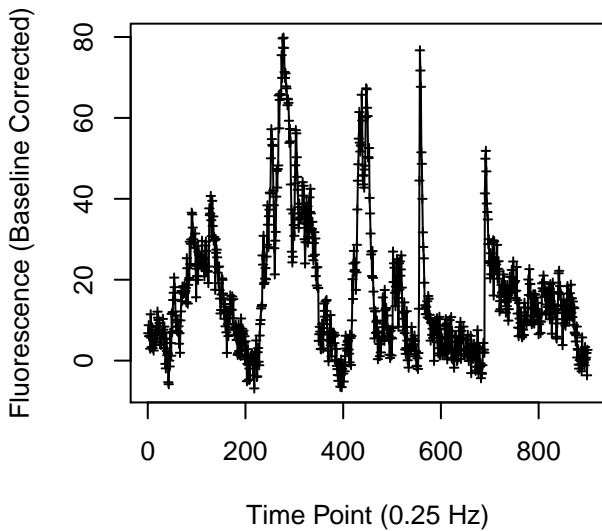

**Cell 48**

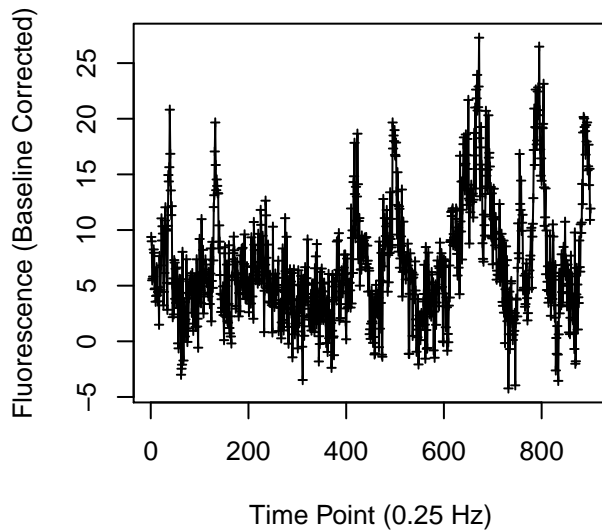

**Cell 49**

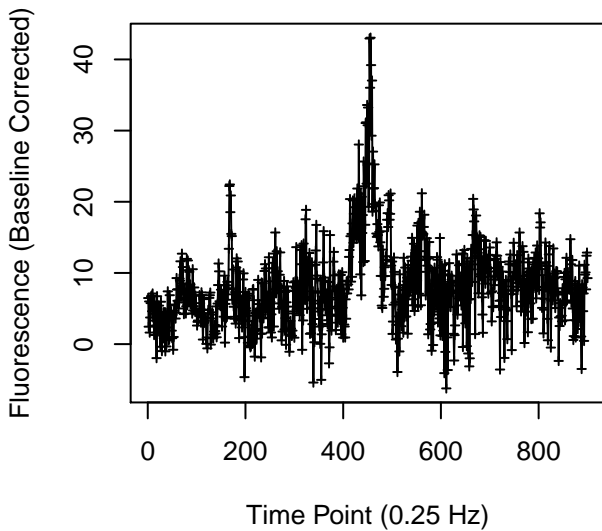

**Cell 50**

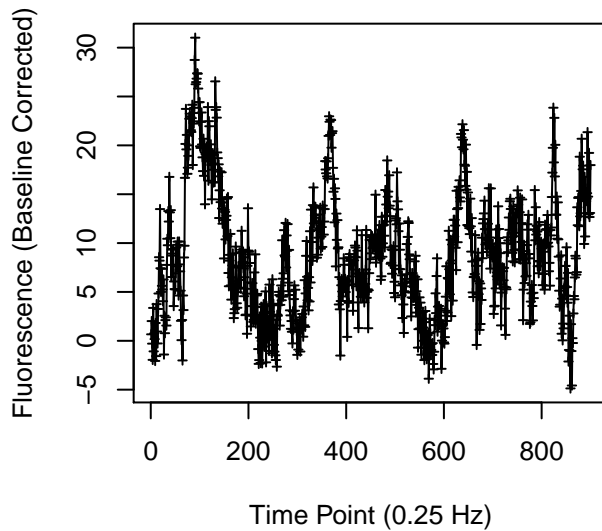

**Cell 51**

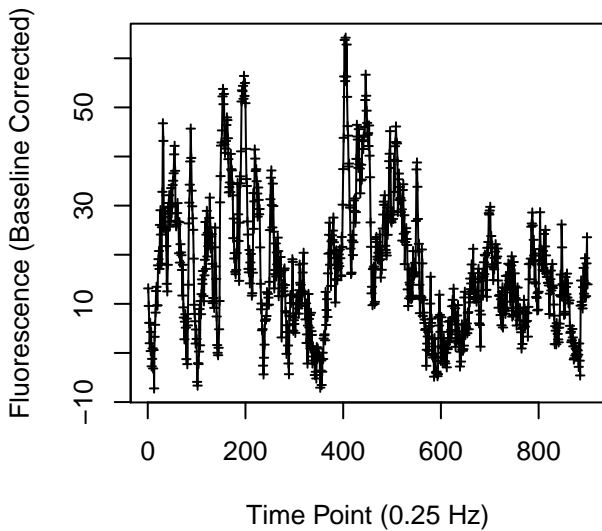

**Cell 52**

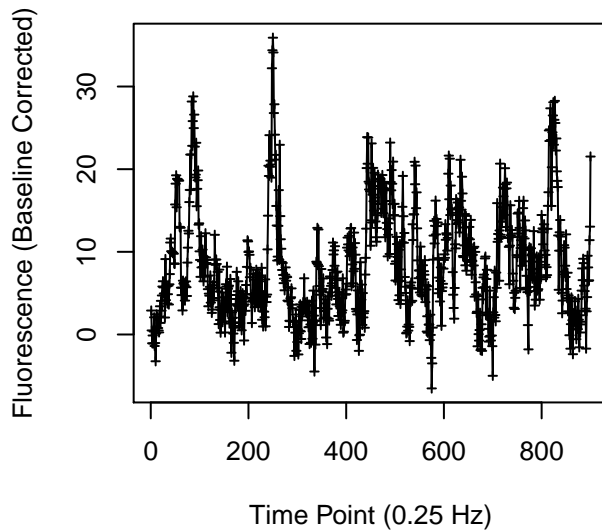

**Cell 53**

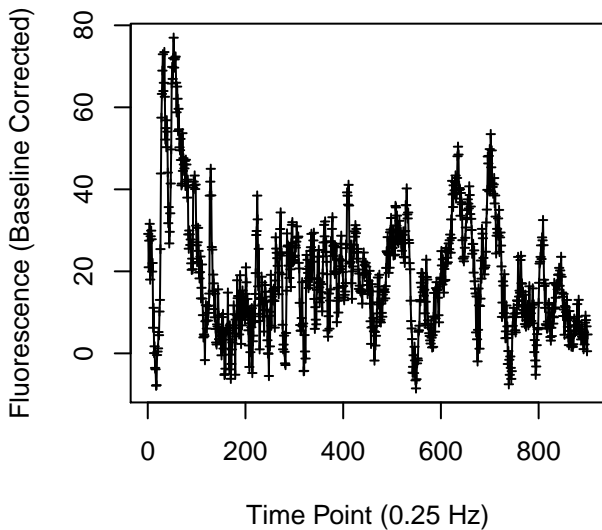

**Cell 54**

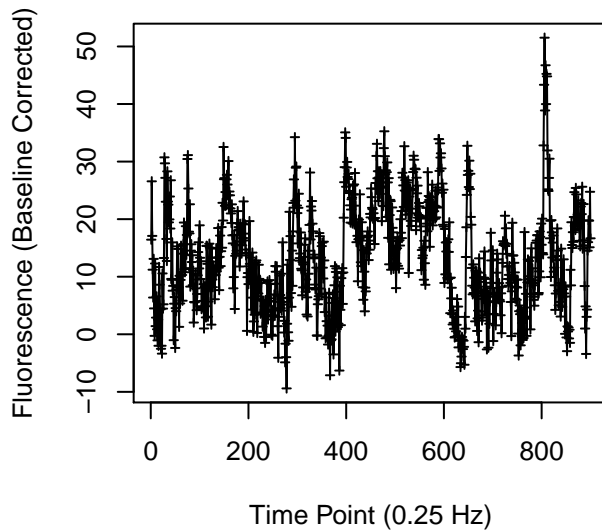

**Cell 55**

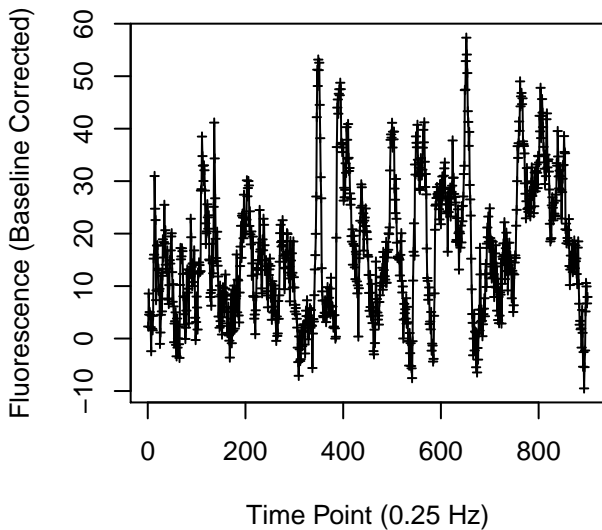

**Cell 56**

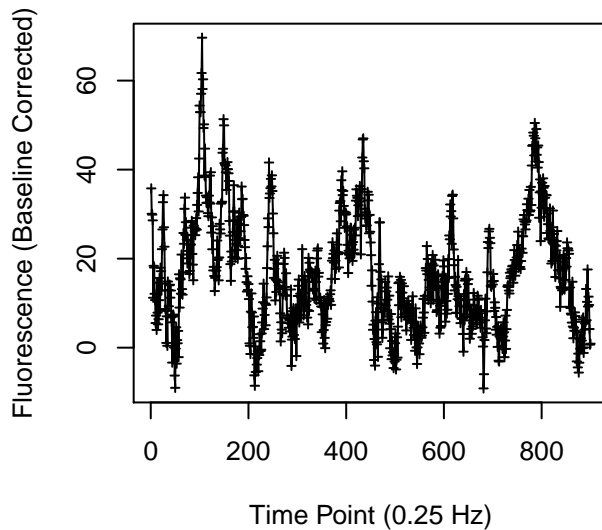

**Cell 57**

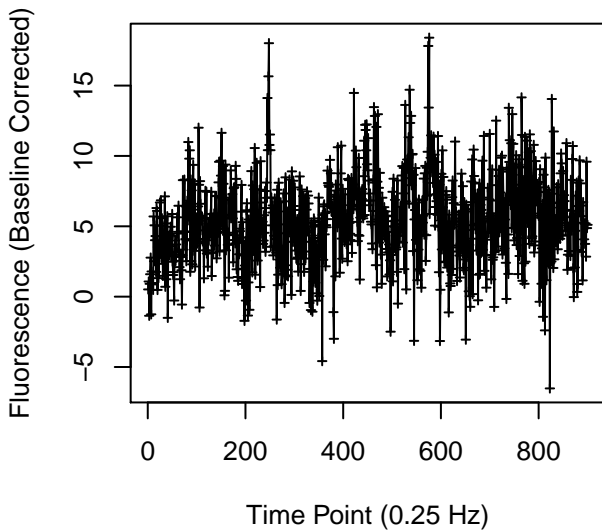

**Cell 58**

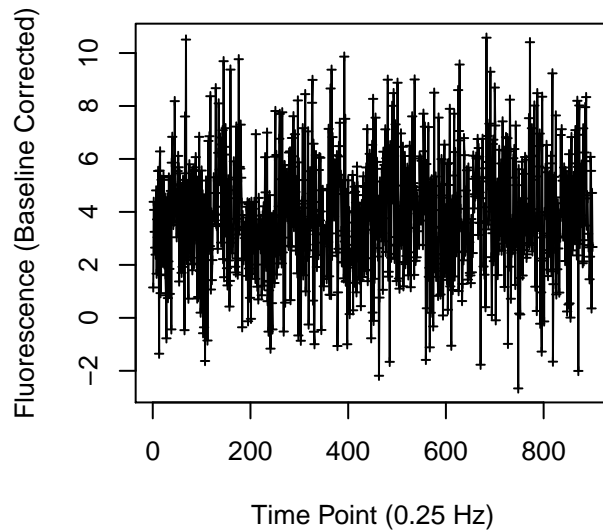

**Cell 59**

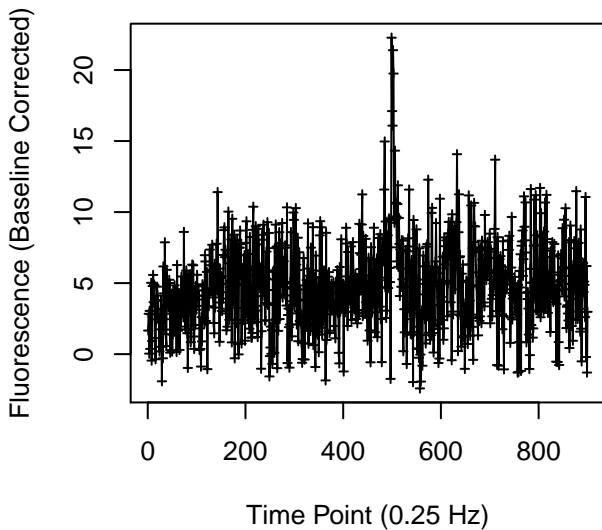

**Cell 60**

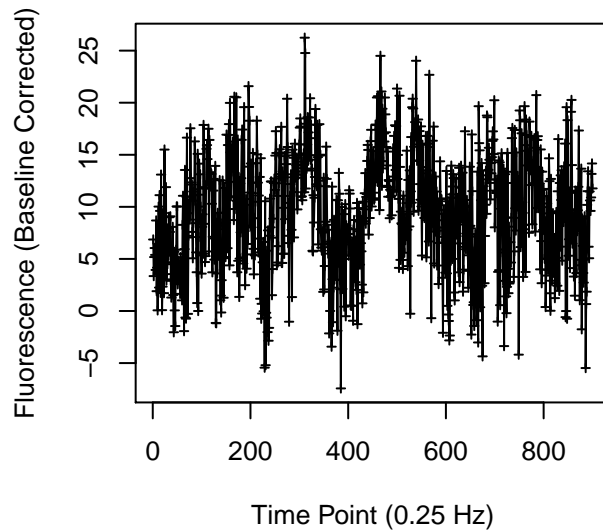

**Cell 61**

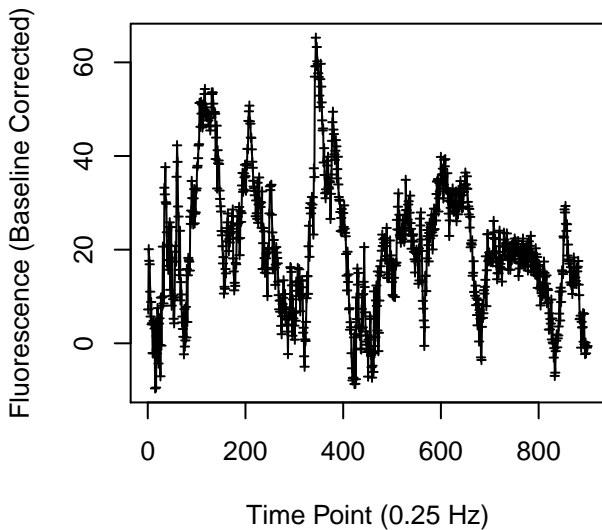

**Cell 62**

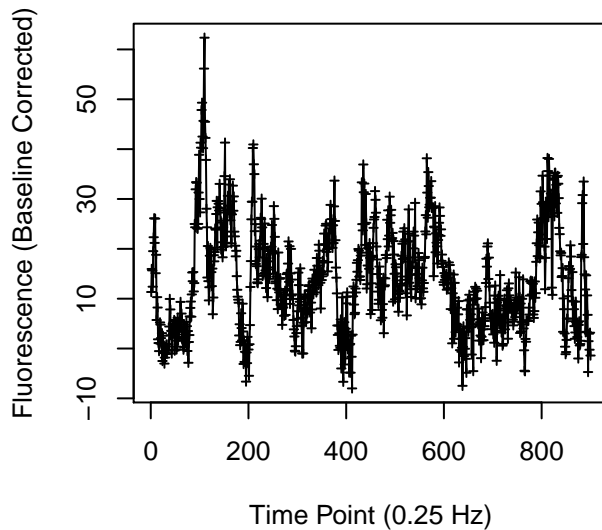

**Cell 63**

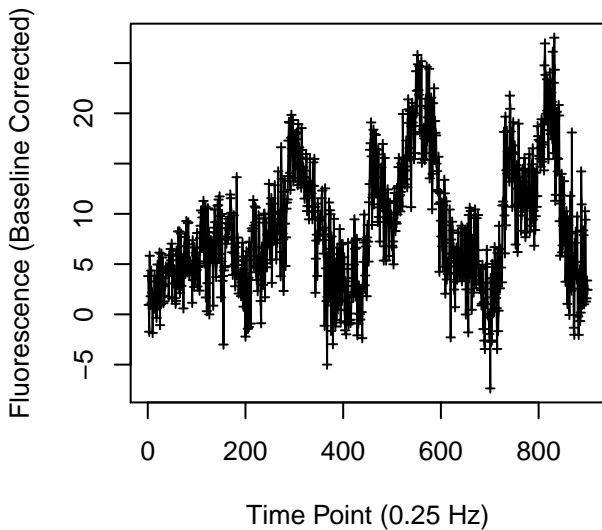

**Cell 64**

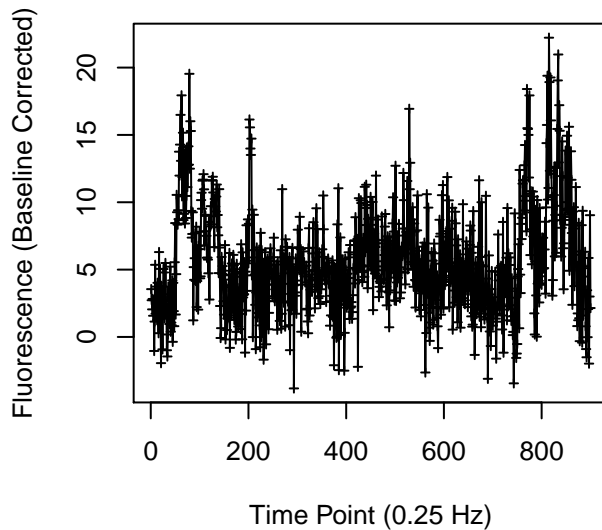

**Cell 65**

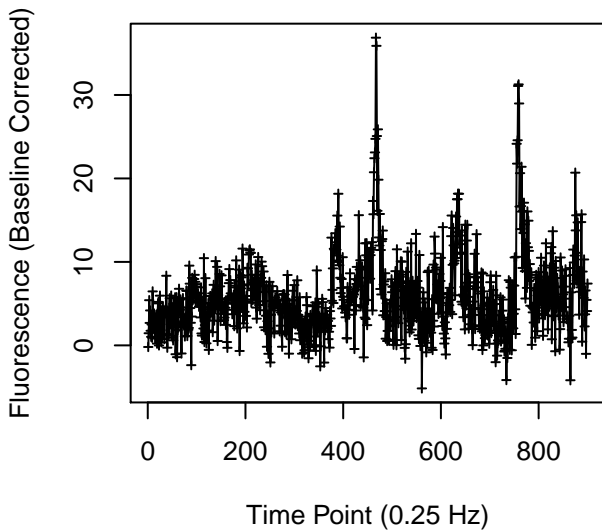

**Cell 66**

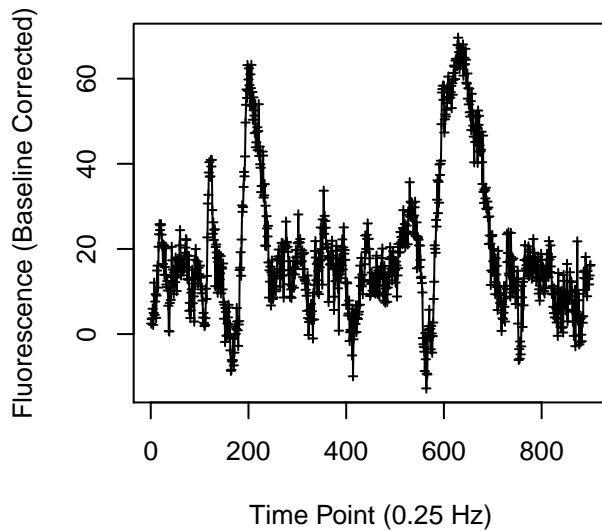

**Cell 67**

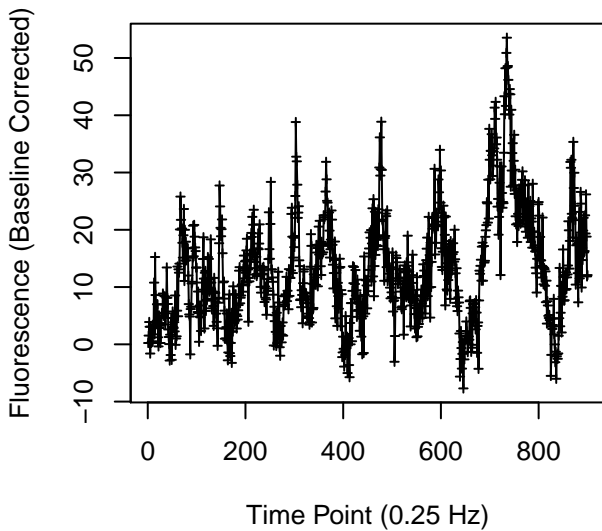

**Cell 68**

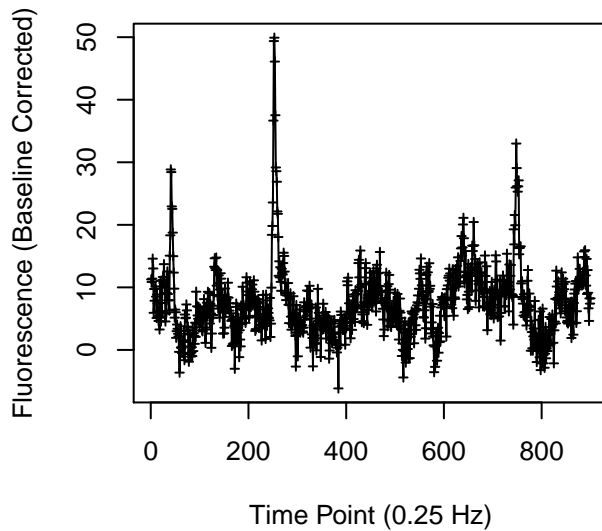

**Cell 69**

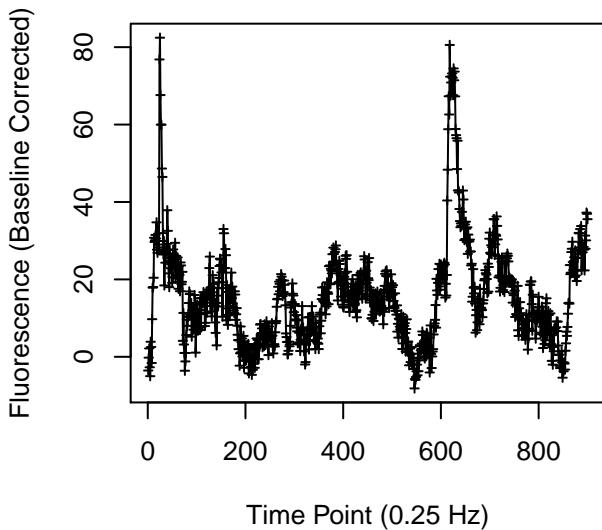

**Cell 70**

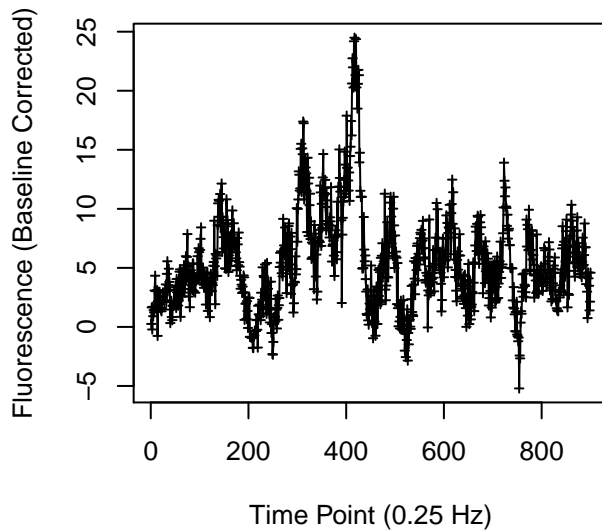

**Cell 71**

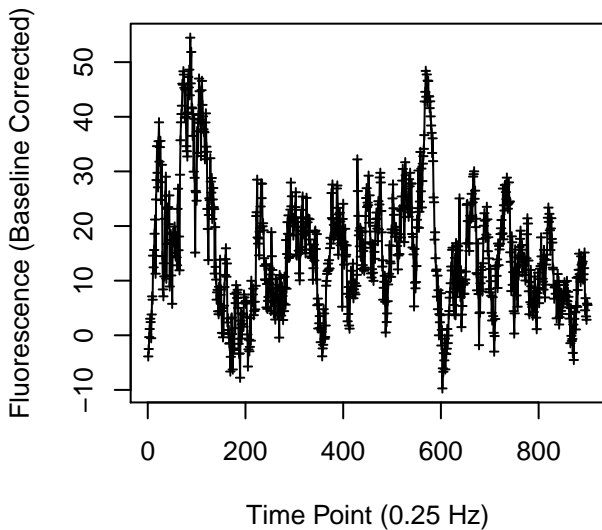

**Cell 72**

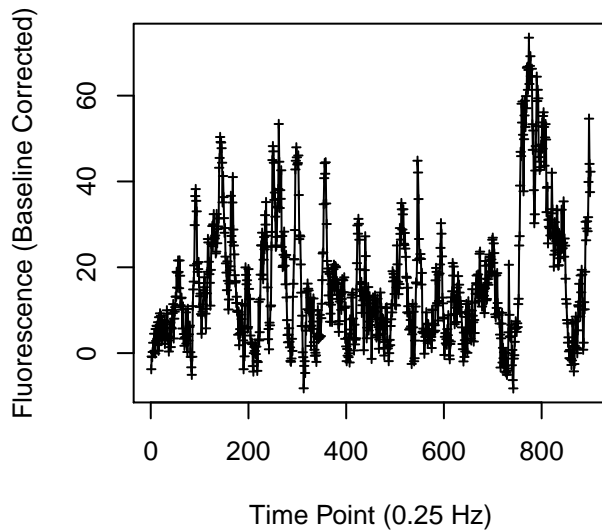

**Cell 73**

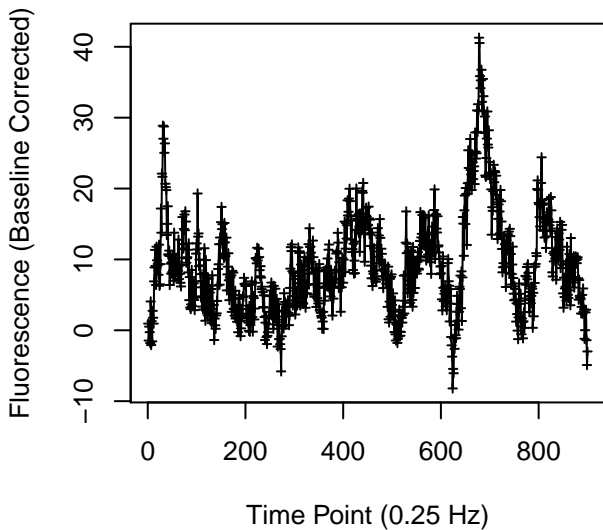

**Cell 74**

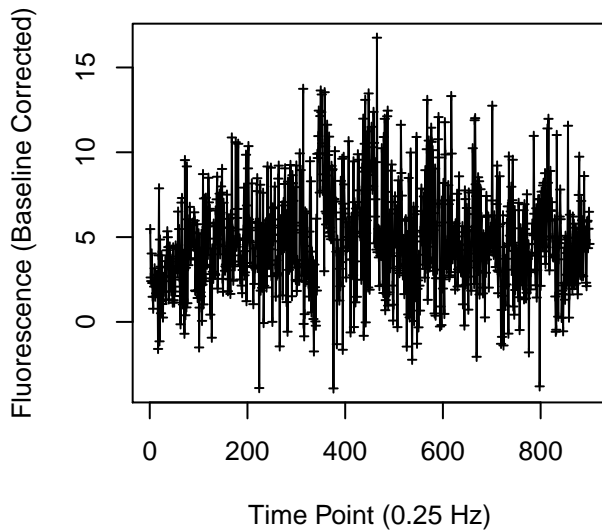

**Cell 75**

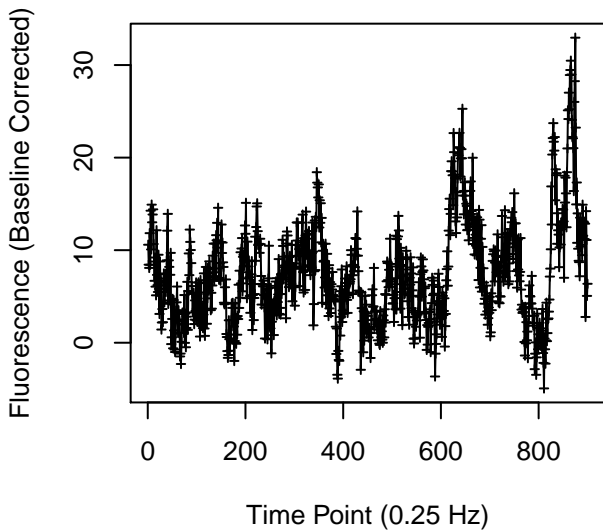

**Cell 76**

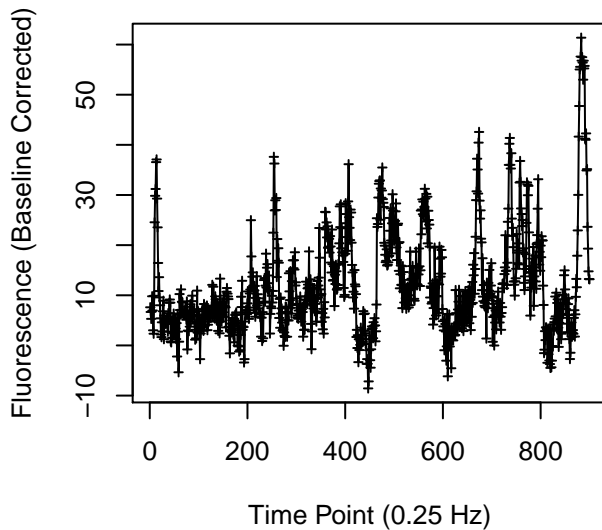

**Cell 77**

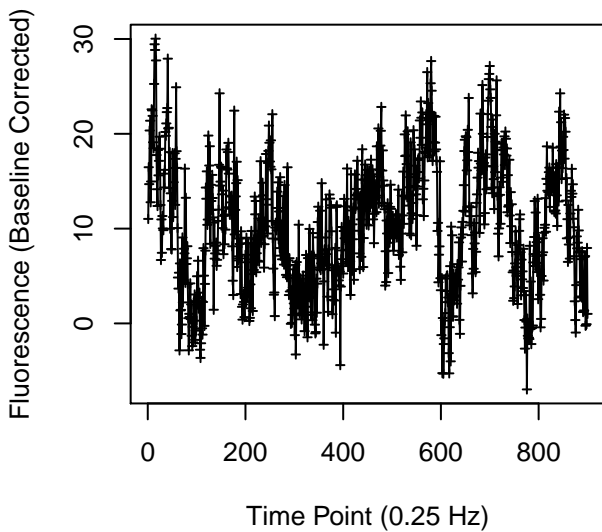

**Cell 78**

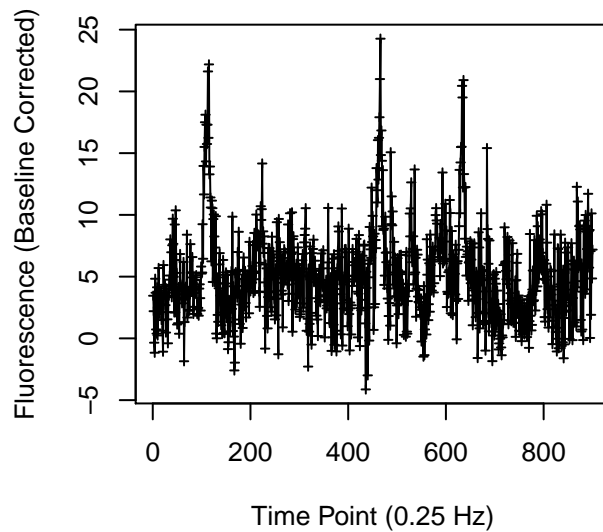

**Cell 79**

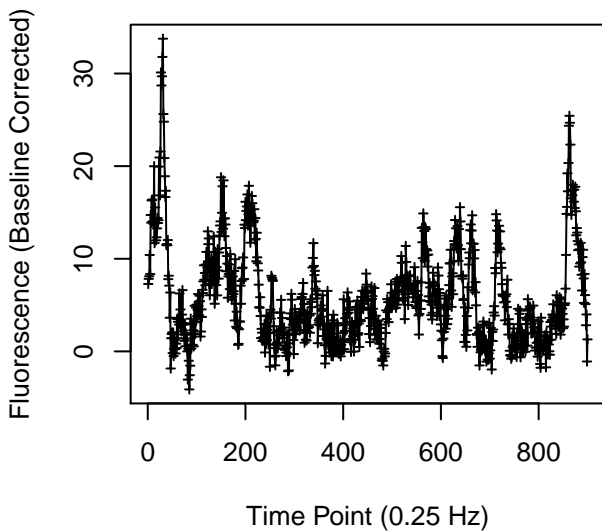

**Cell 80**

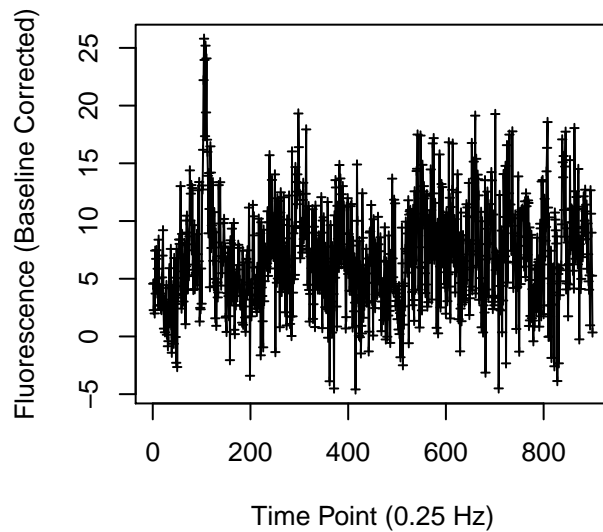

**Cell 81**

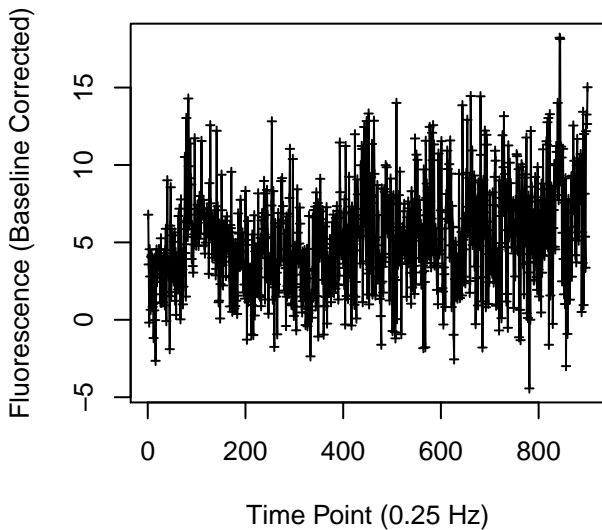

**Cell 82**

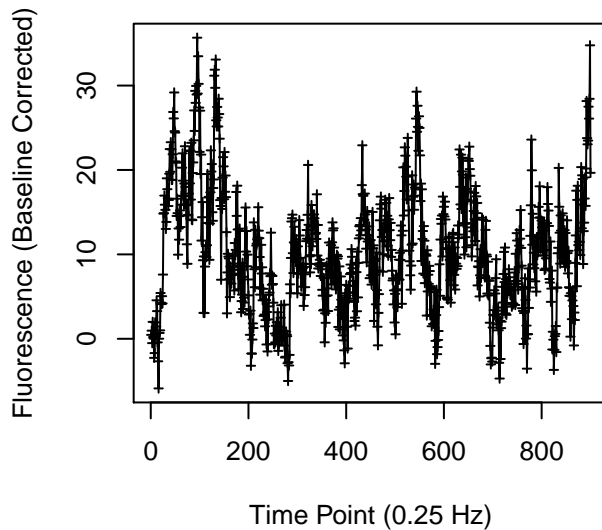

**Cell 83**

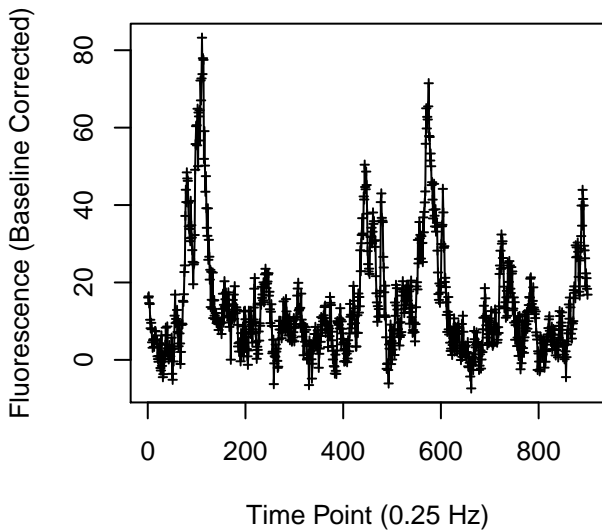

**Cell 84**

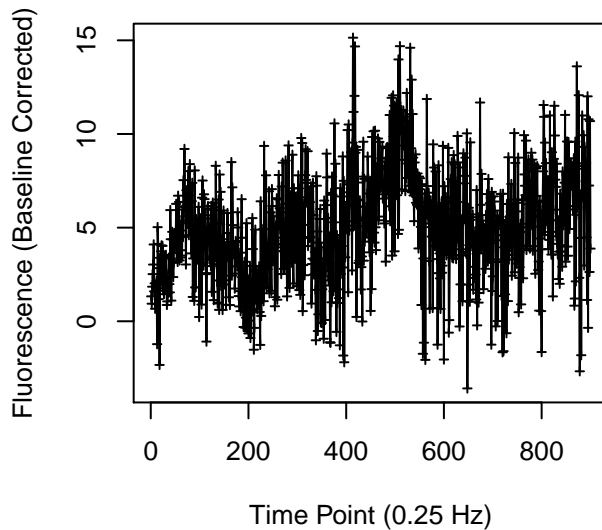

**Cell 85**

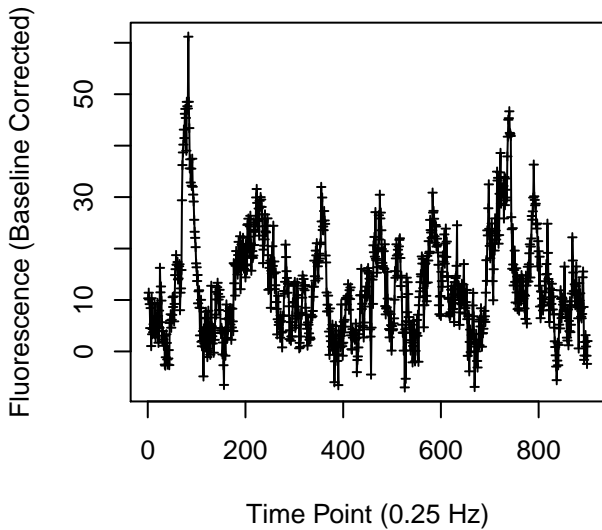

**Cell 86**

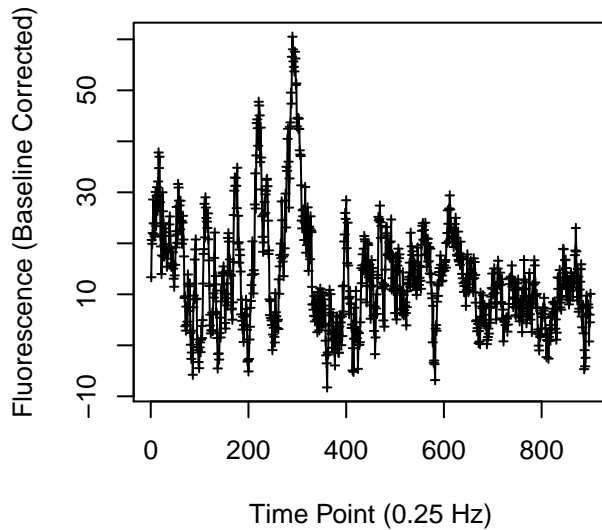

**Cell 87**

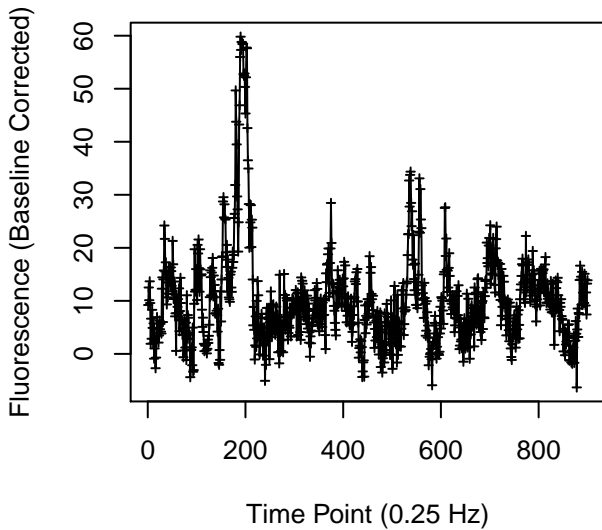

**Cell 88**

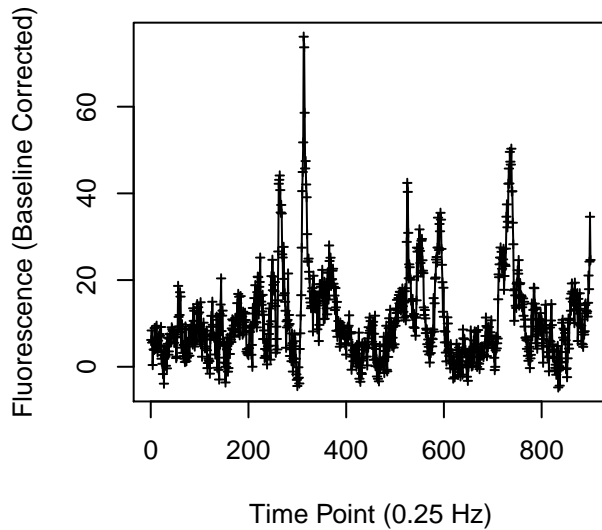

**Cell 89**

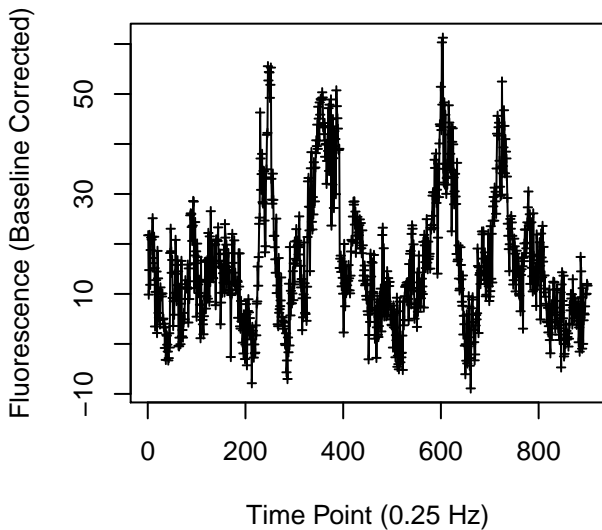

**Cell 90**

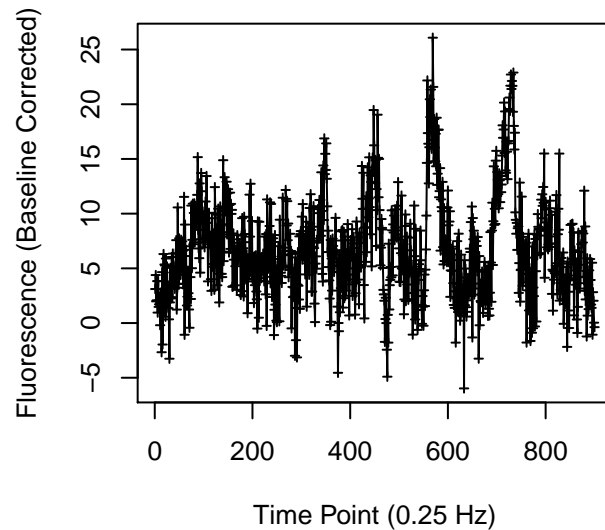

**Cell 91**

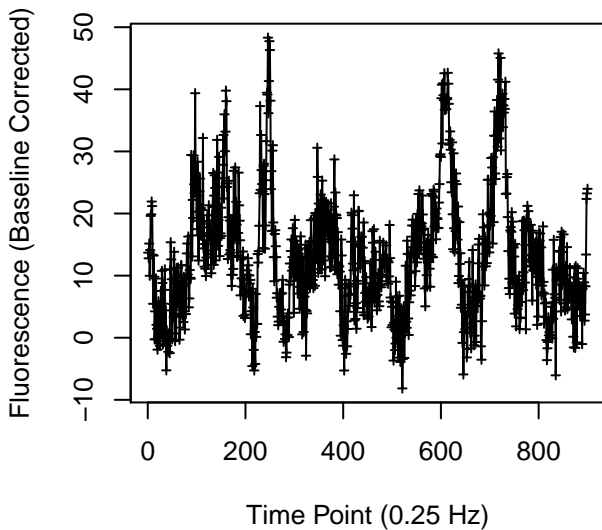

**Cell 92**

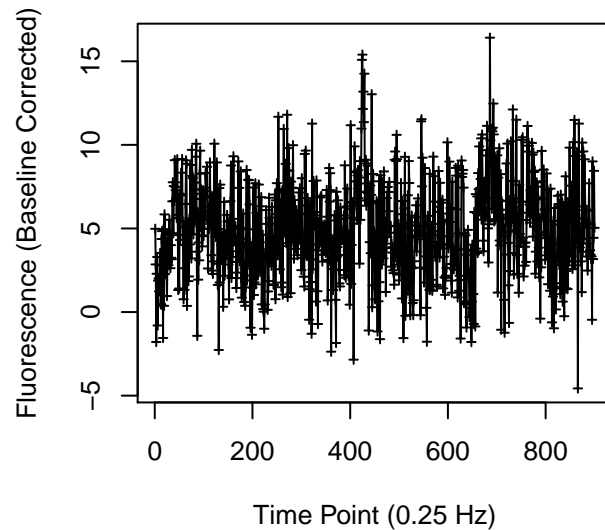

**Cell 93**

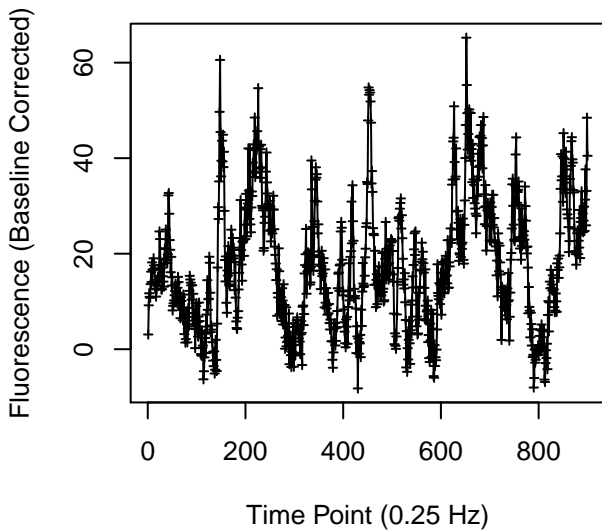

**Cell 94**

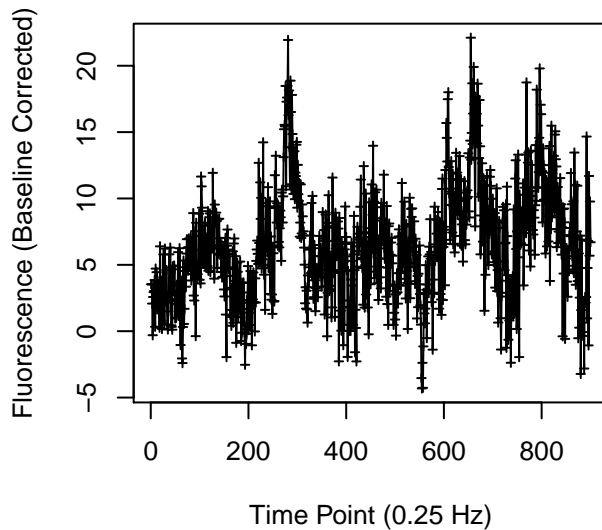

**Cell 95**

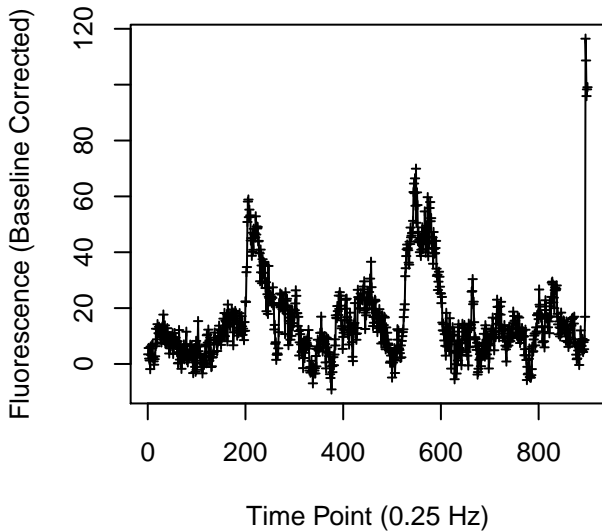

**Cell 96**

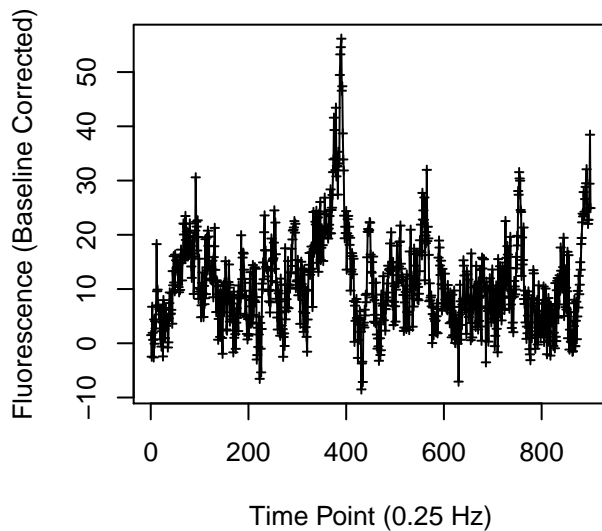

**Cell 97**

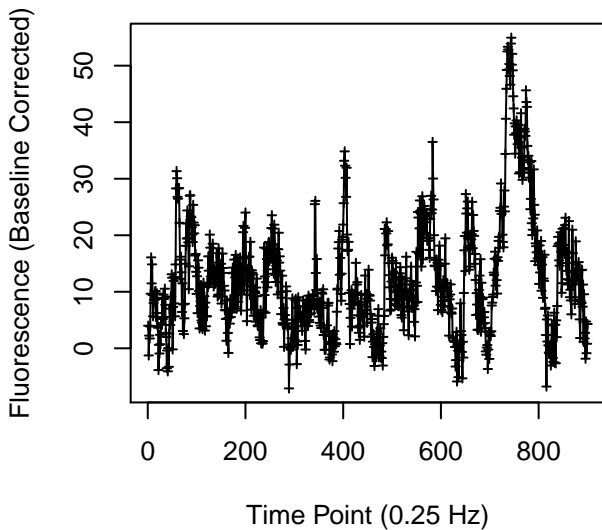

**Cell 98**

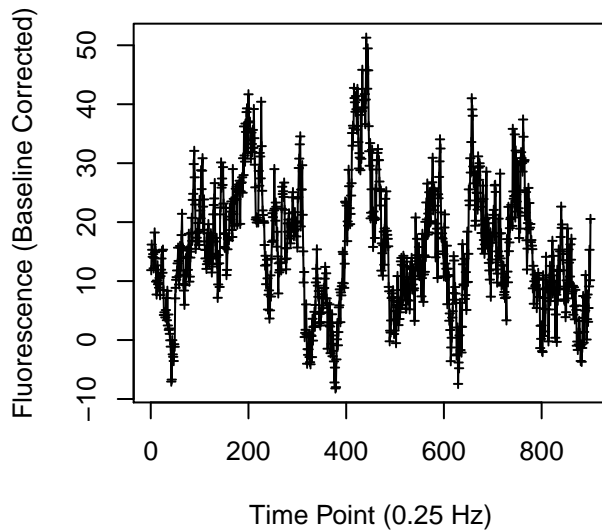

**Cell 99**

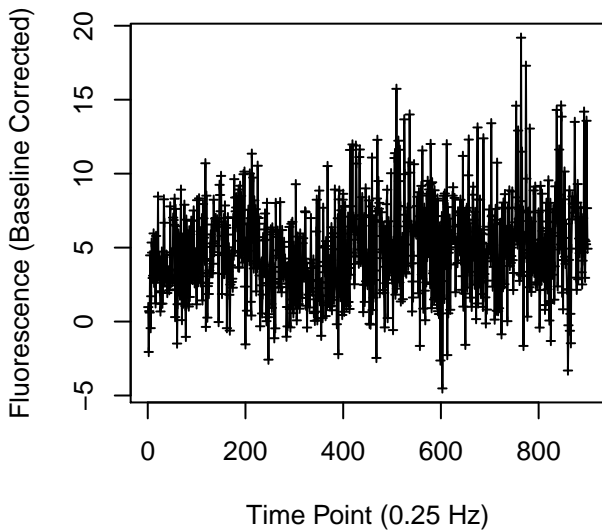

**Cell 100**

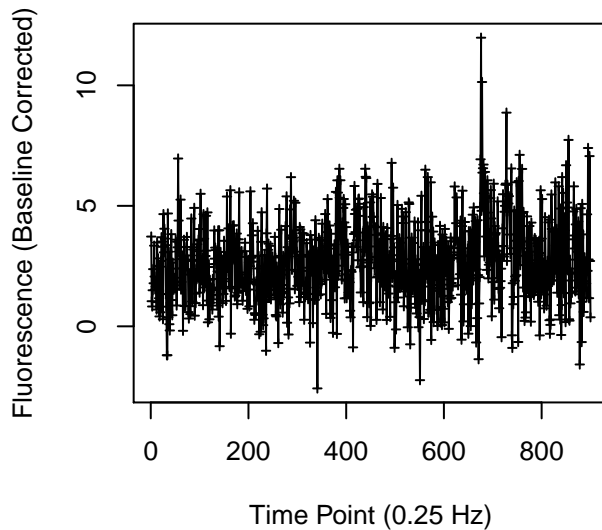

**Cell 101**

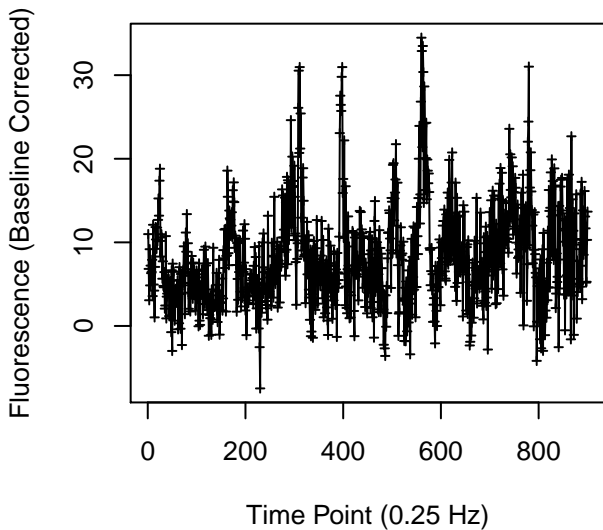

**Cell 102**

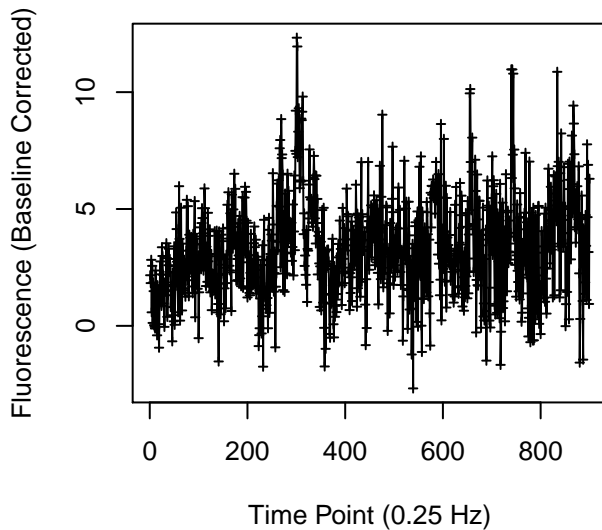

**Cell 103**

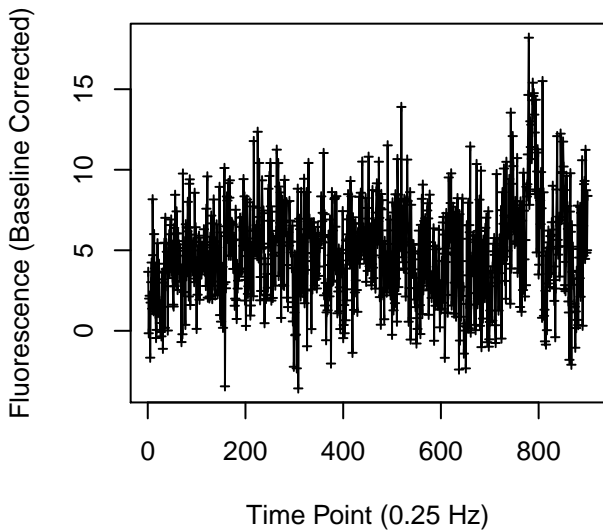

**Cell 104**

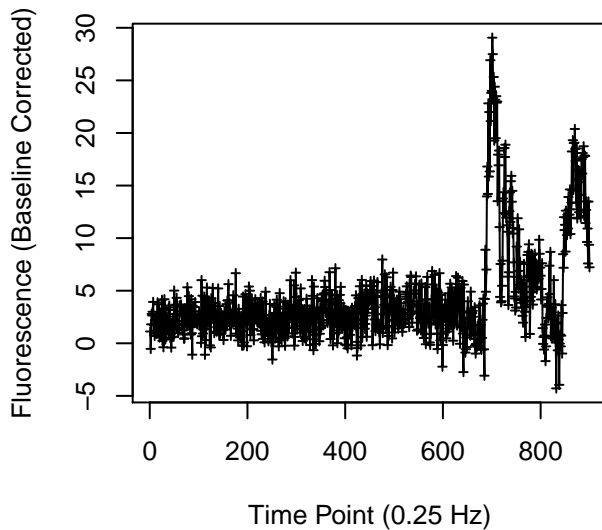

**Cell 105**

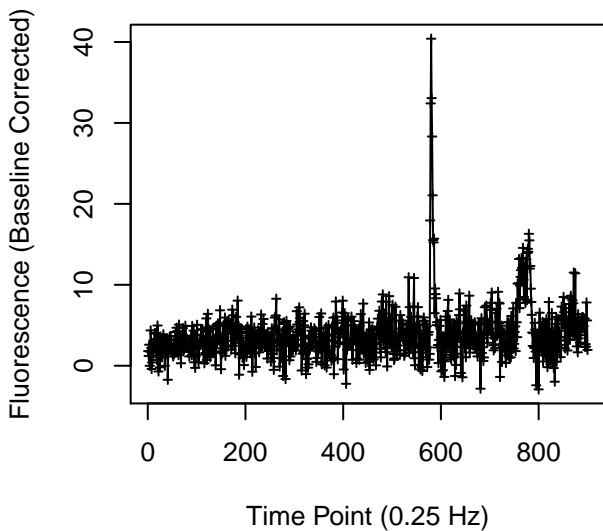

**Cell 106**

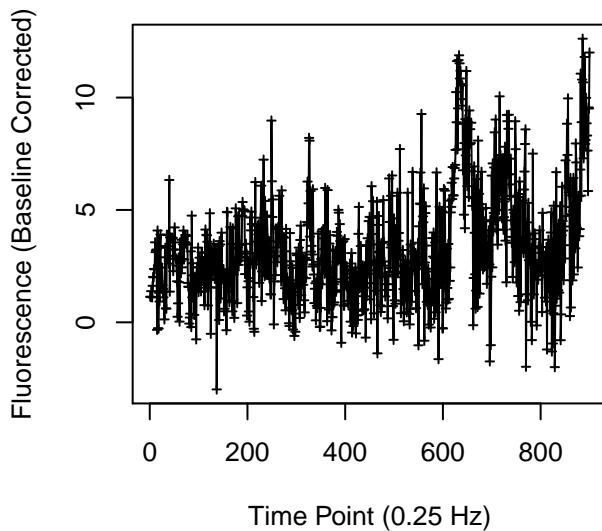

**Cell 107**

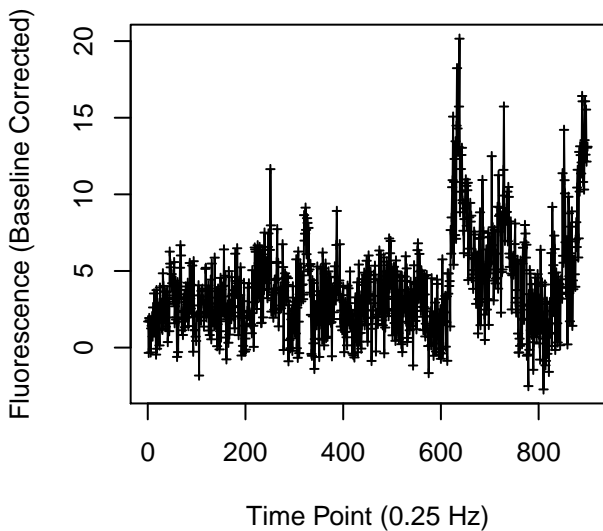

**Cell 108**

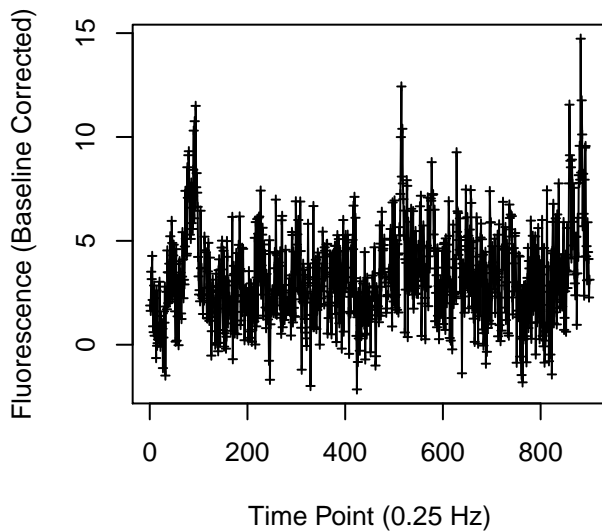

**Cell 109**

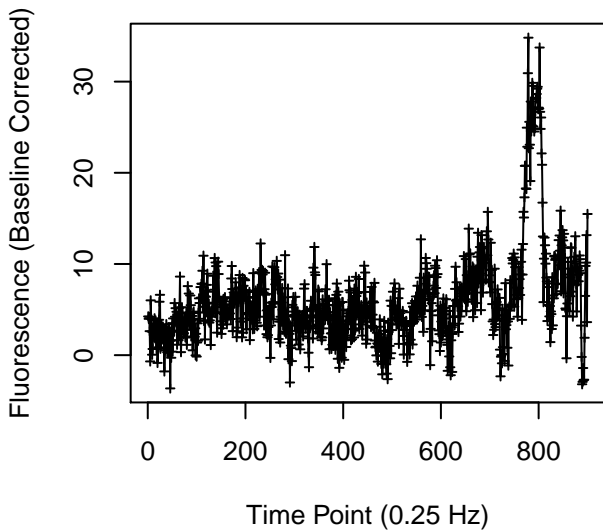

**Cell 110**

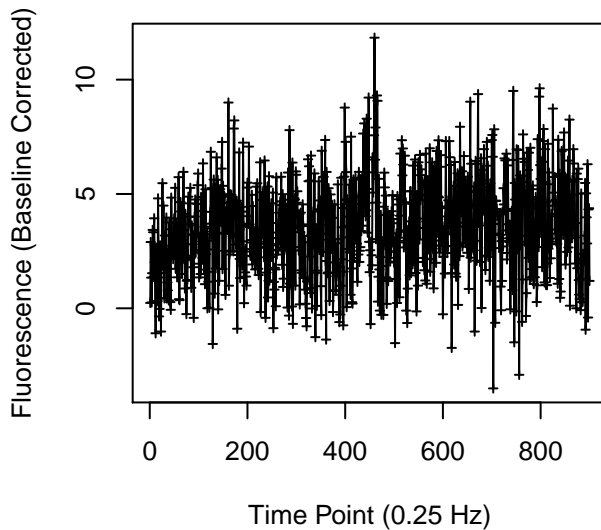

**Cell 111**

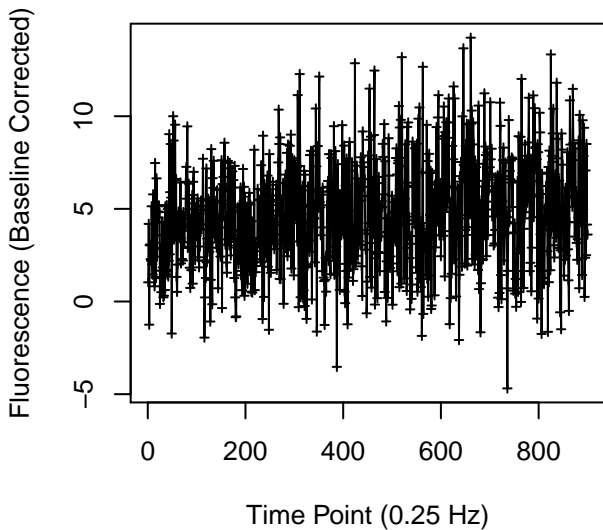

**Cell 112**

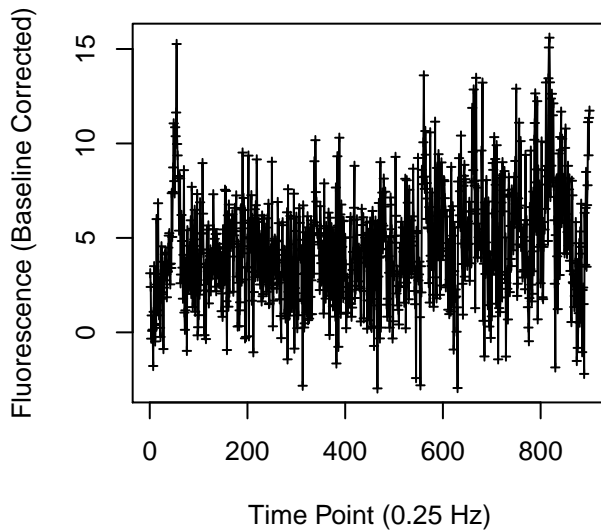

**Cell 113**

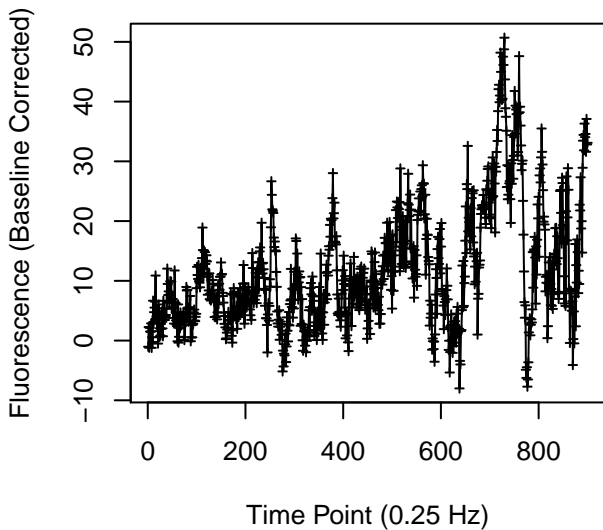

**Cell 114**

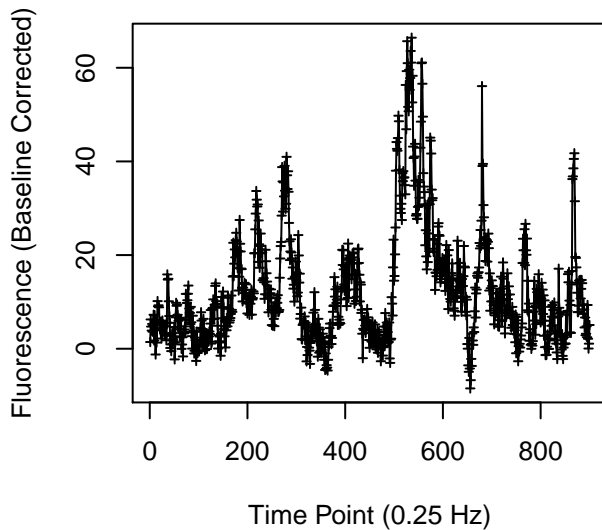

**Cell 115**

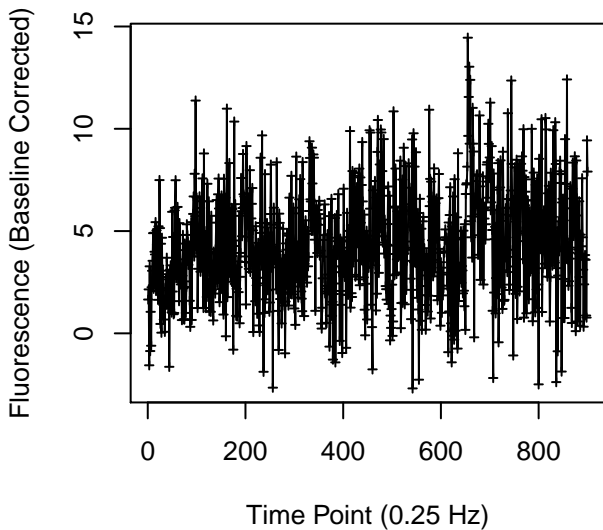

**Cell 116**

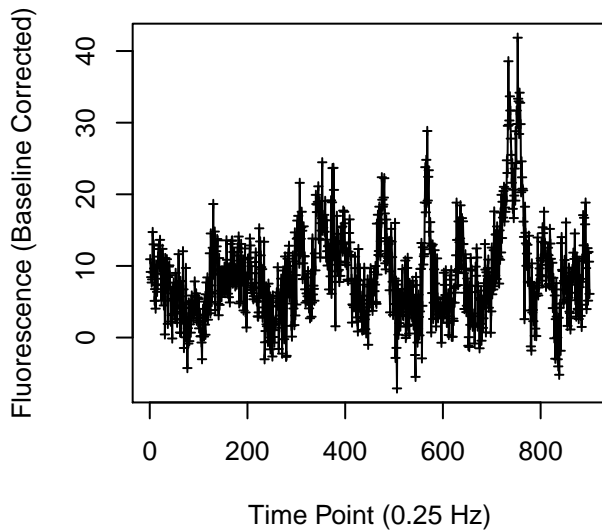

**Cell 117**

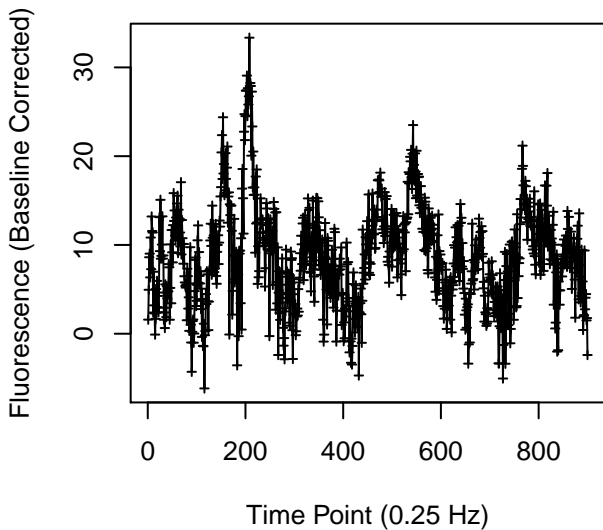

**Cell 118**

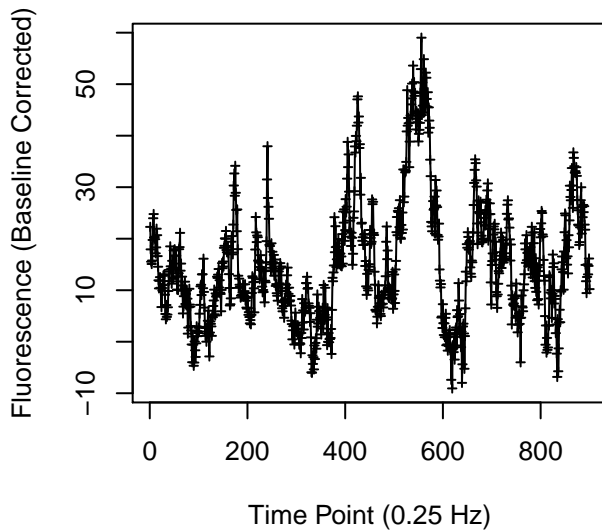

**Cell 119**

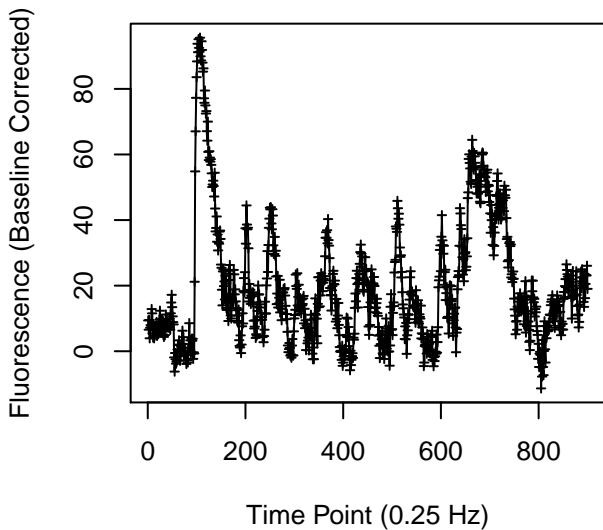

**Cell 120**

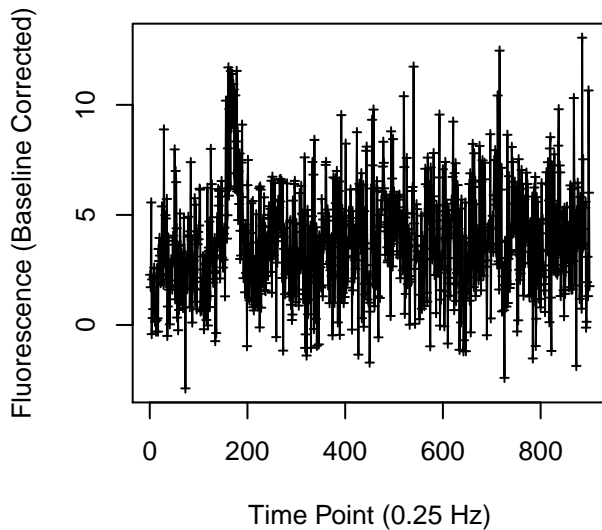

**Cell 121**

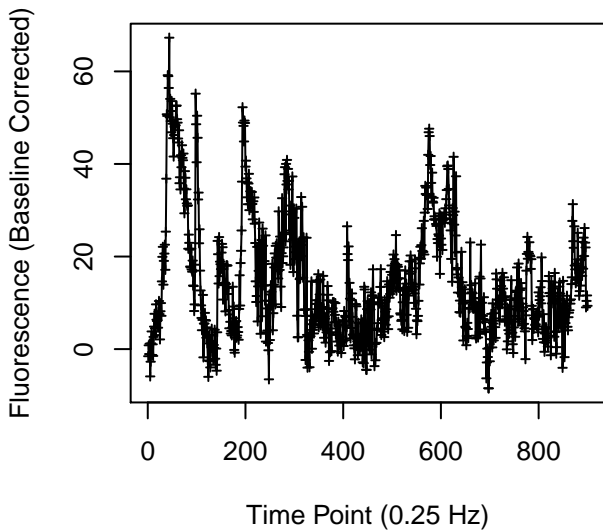

**Cell 122**

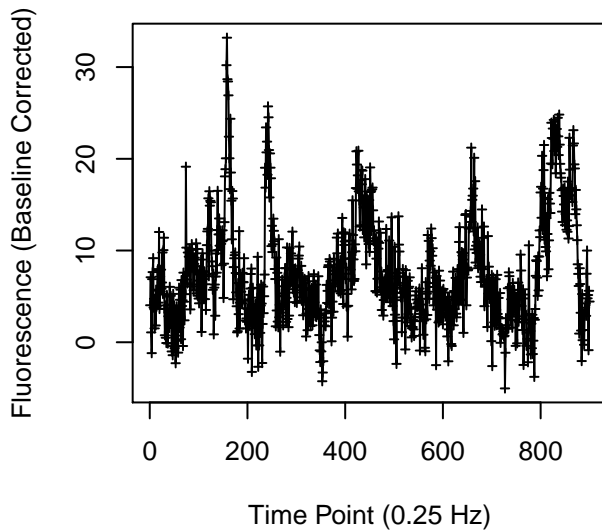

**Cell 123**

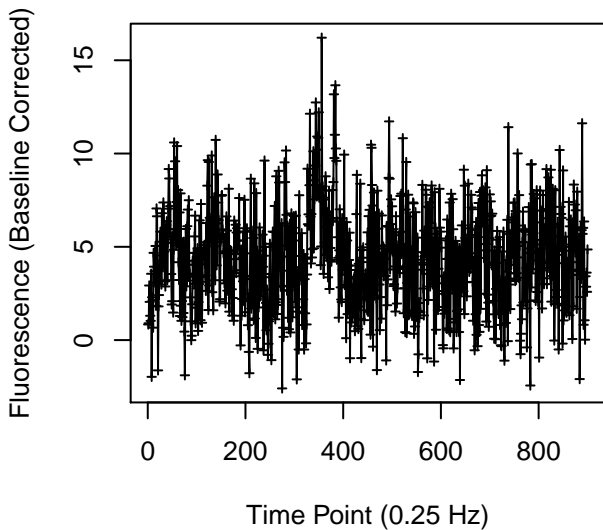

**Cell 124**

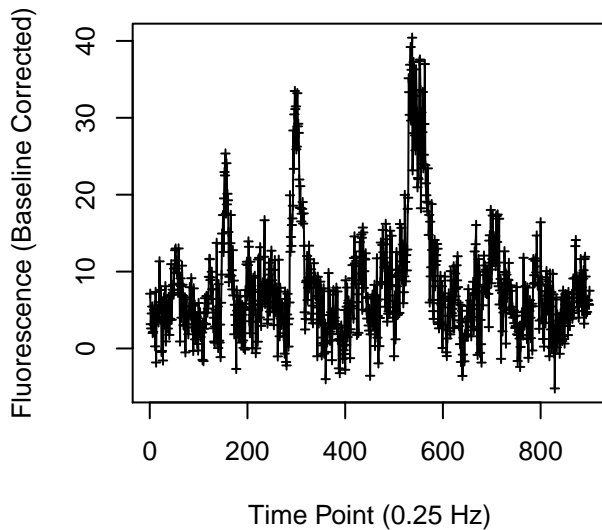

**Cell 125**

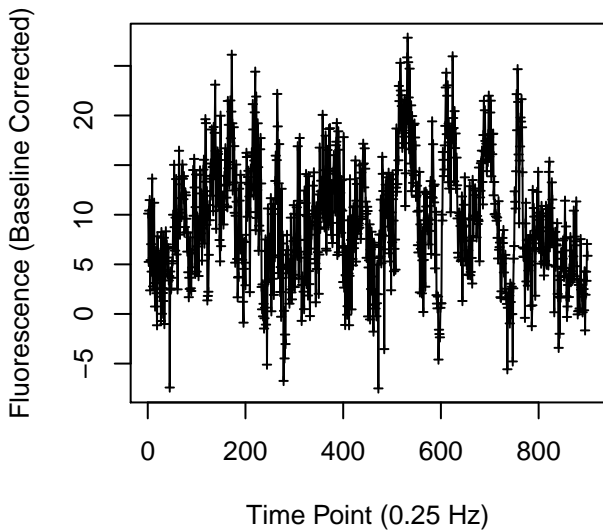

**Cell 126**

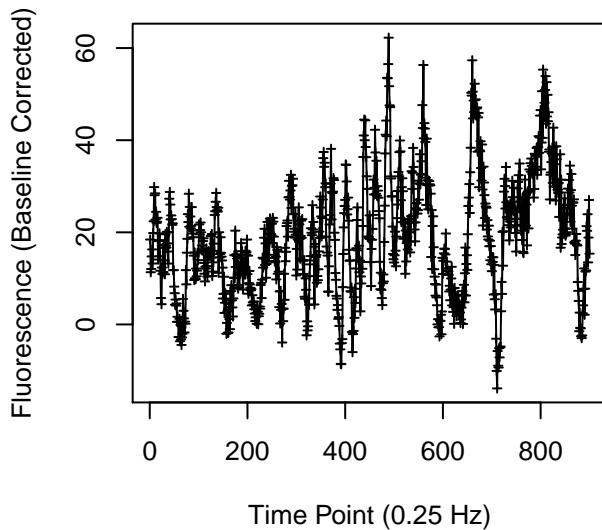

**Cell 127**

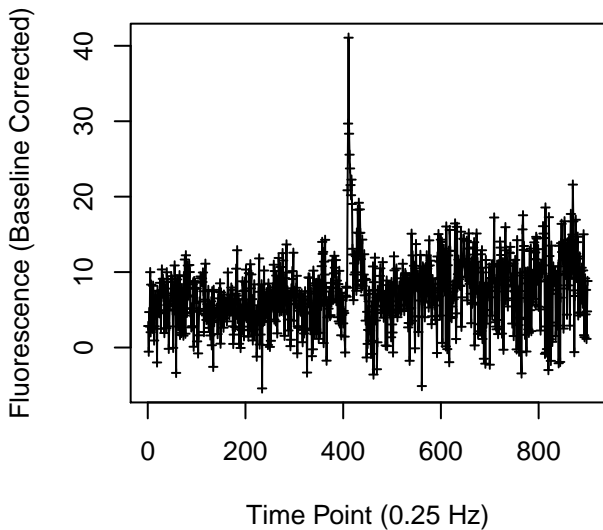

**Cell 128**

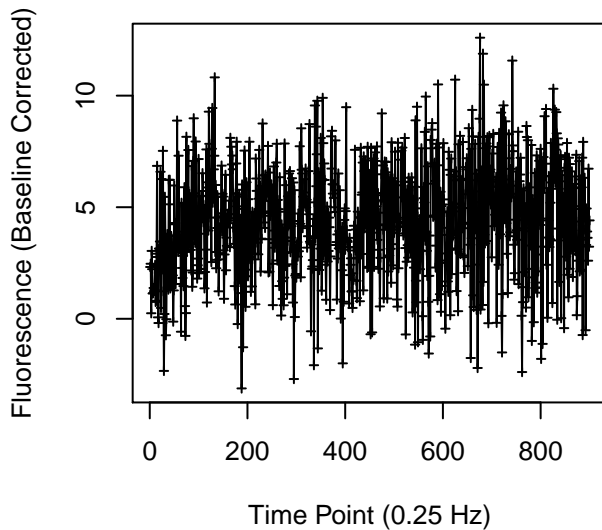

**Cell 129**

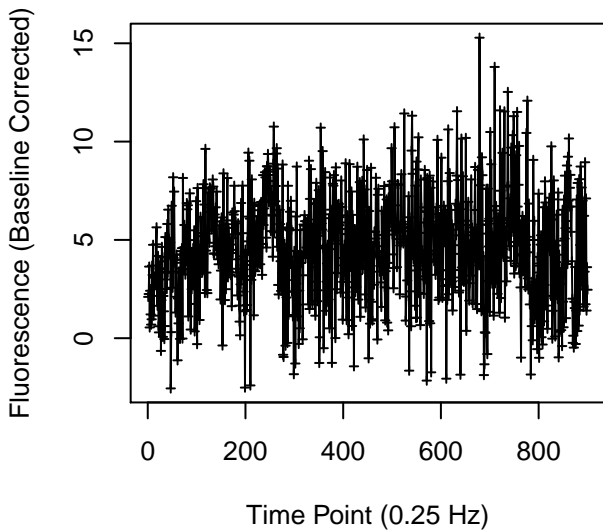

**Cell 130**

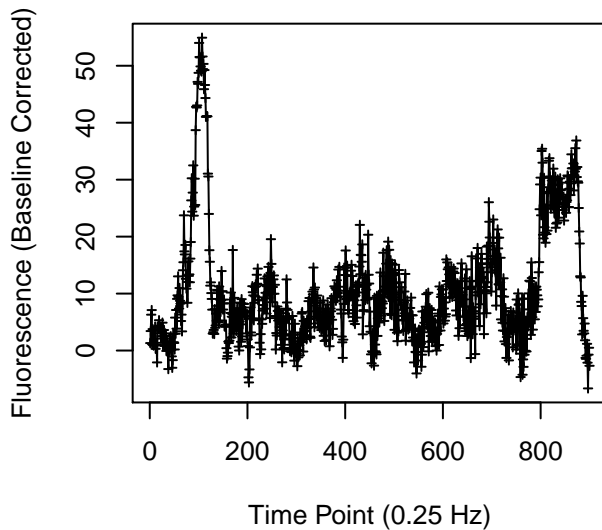

**Cell 131**

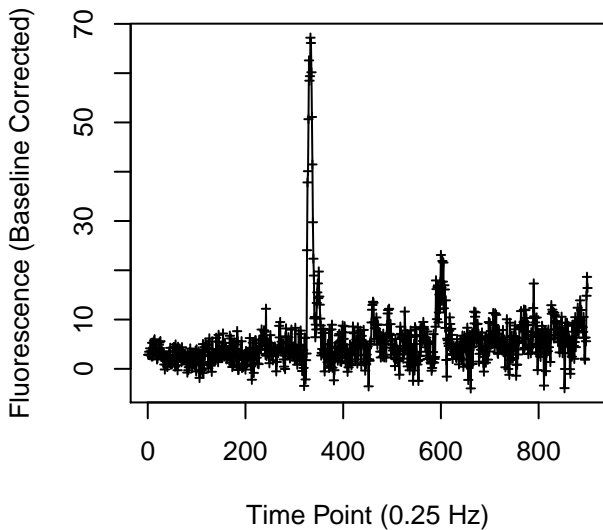

**Cell 132**

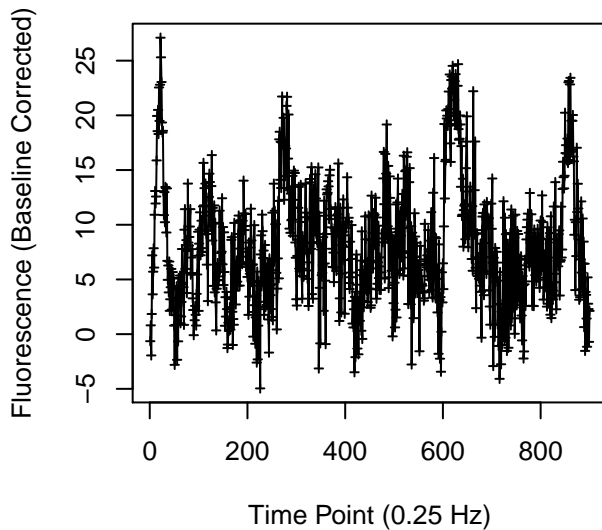

**Cell 133**

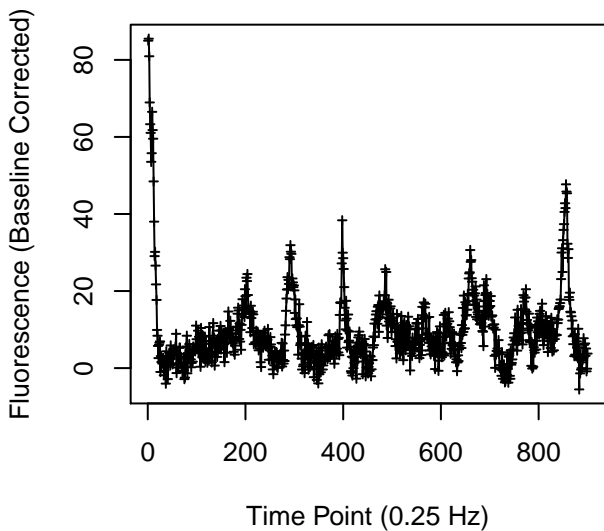

**Cell 134**

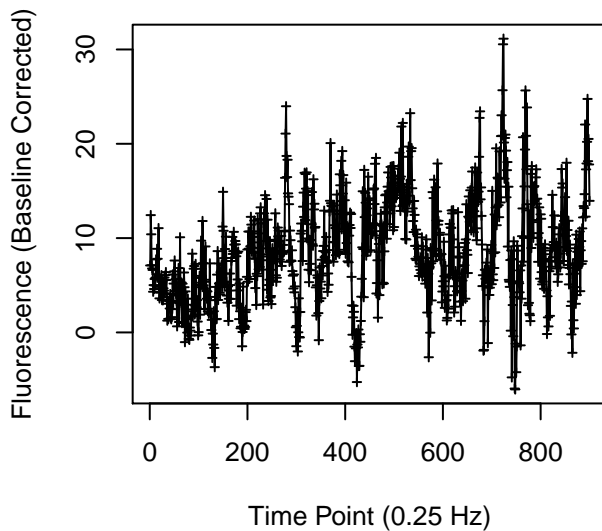

**Cell 135**

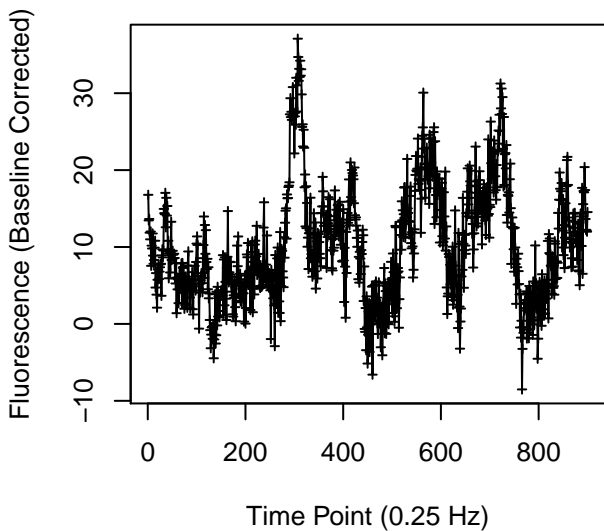

**Cell 136**

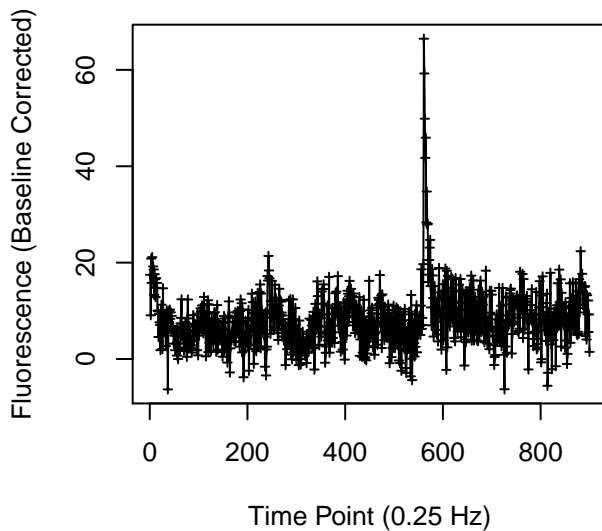

**Cell 137**

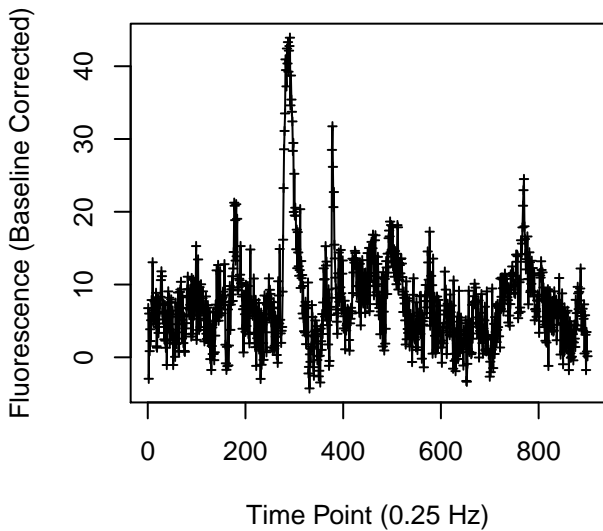

**Cell 138**

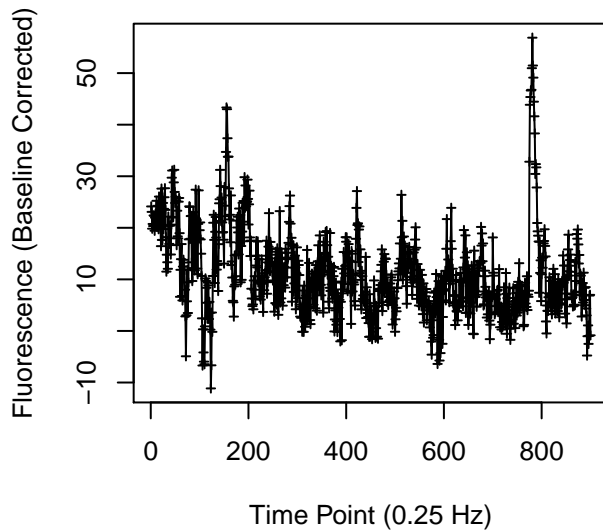

**Cell 139**

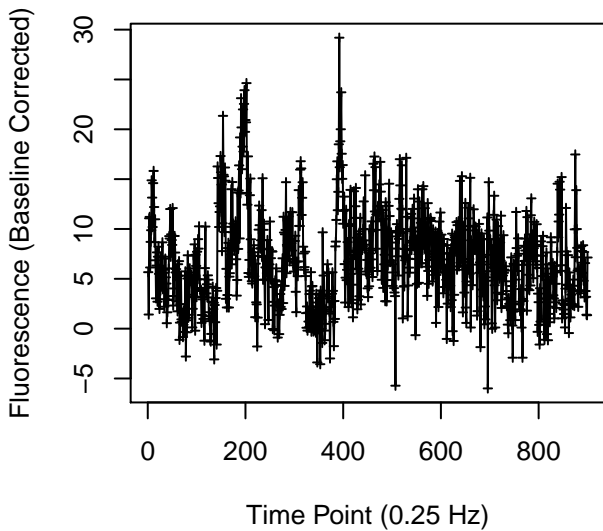

**Cell 140**

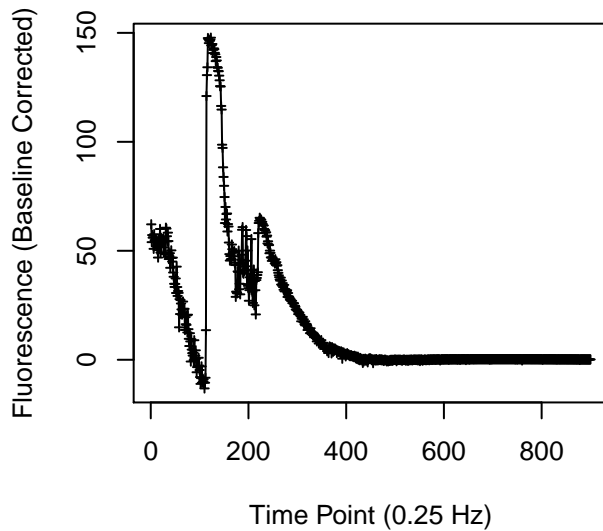

**Cell 141**

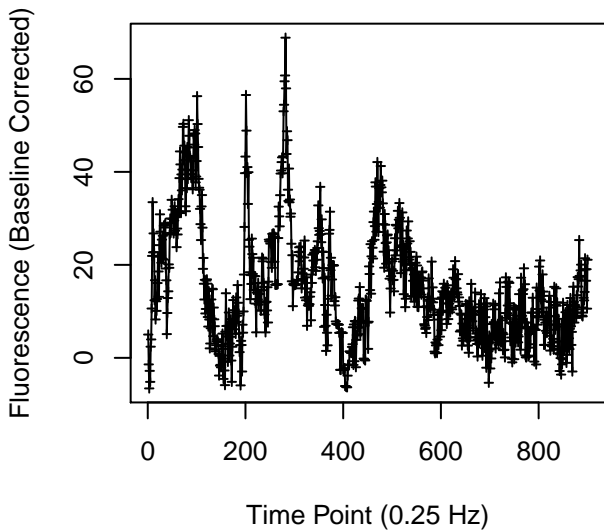

**Cell 142**

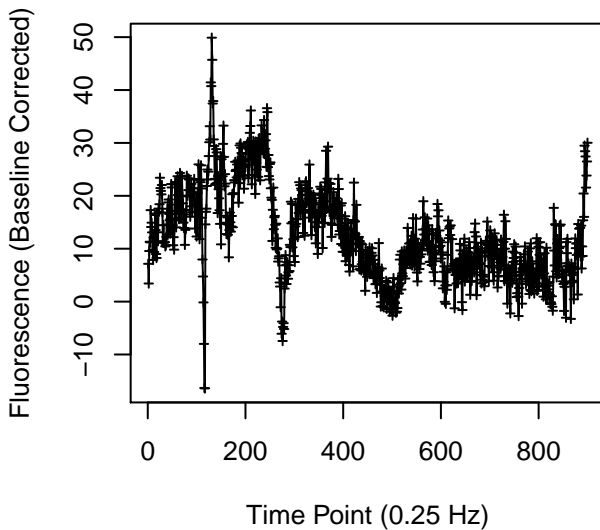

**Cell 143**

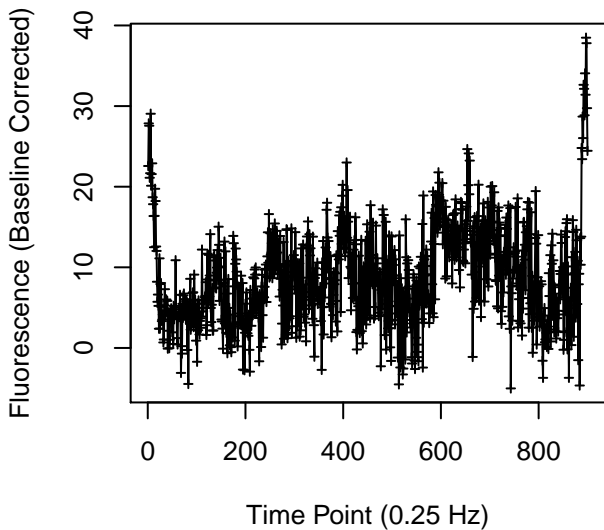

**Cell 144**

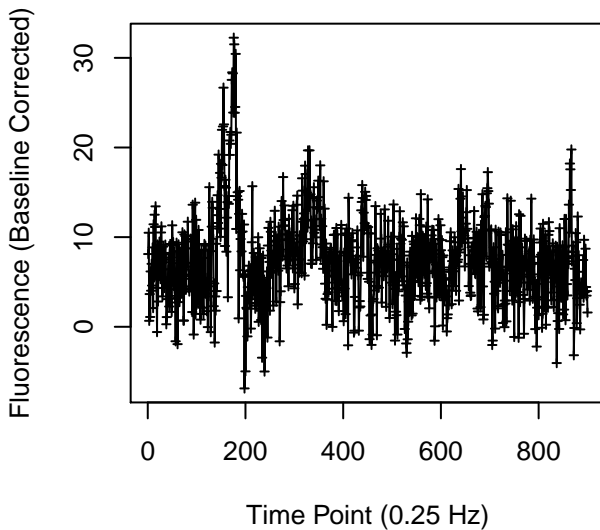

**Cell 145**

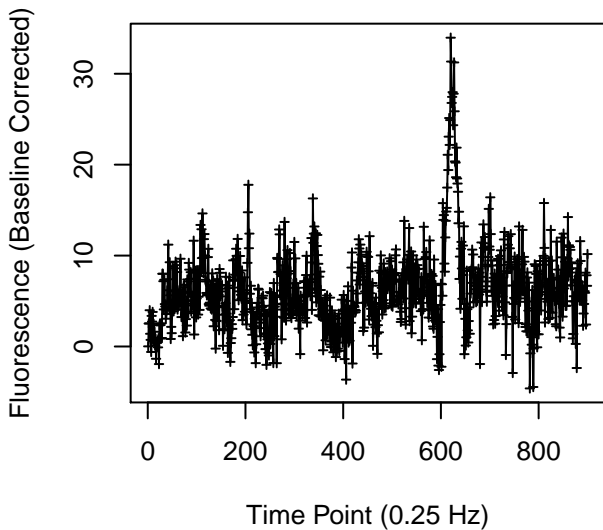

**Cell 146**

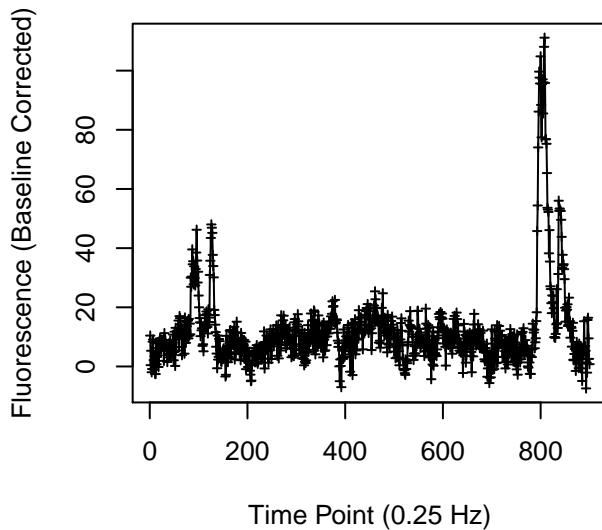

**Cell 147**

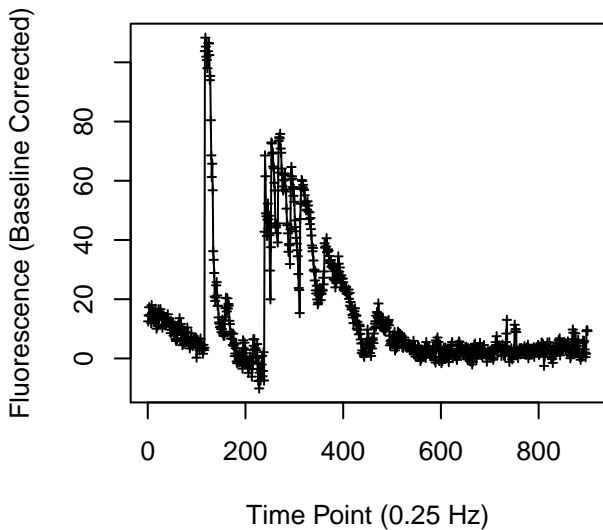

**Cell 148**

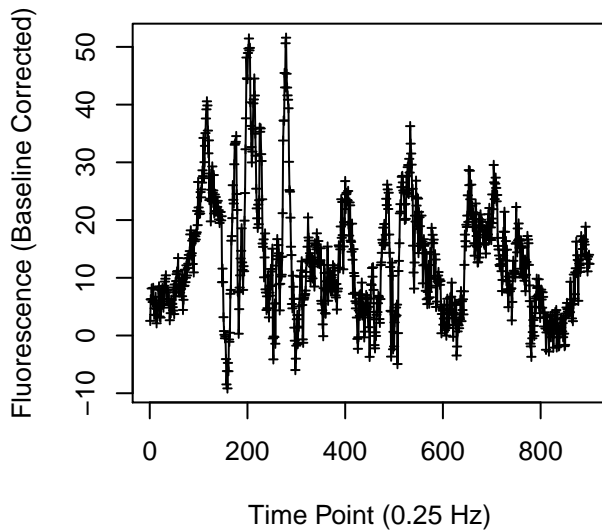

**Cell 149**

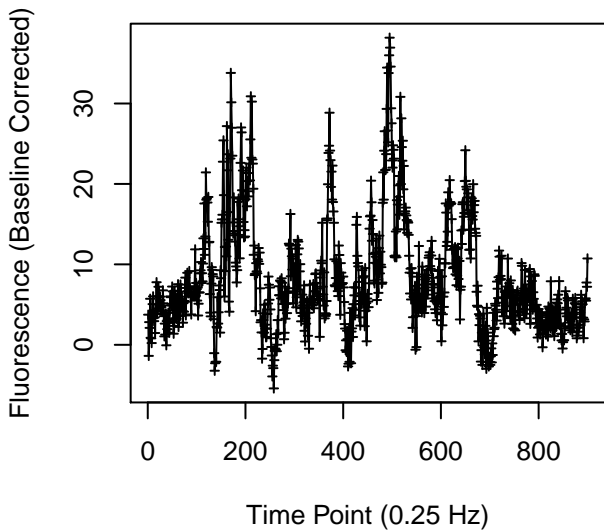

**Cell 150**

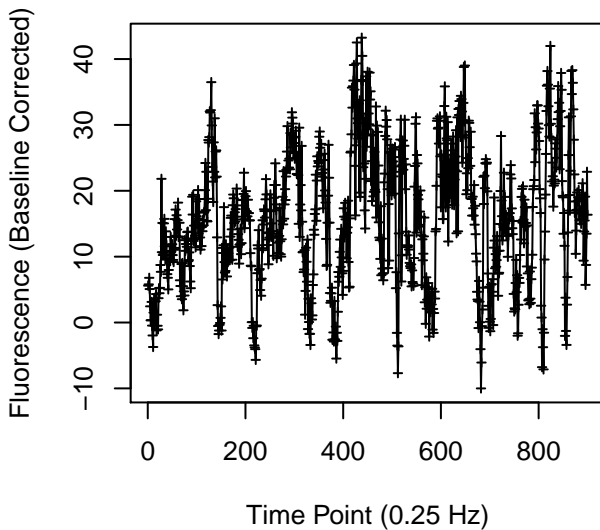

**Cell 151**

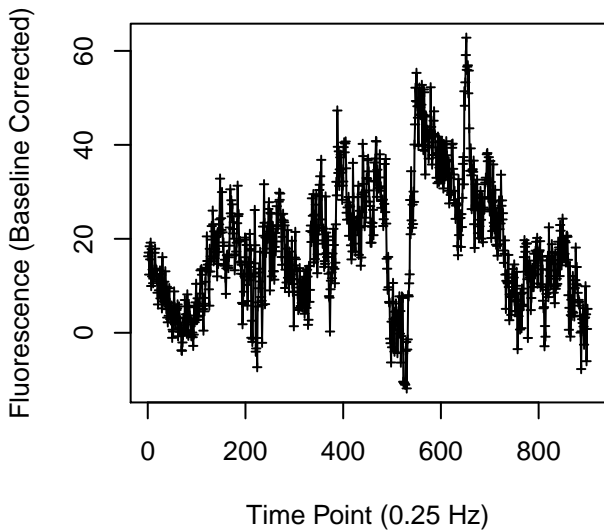

**Cell 152**

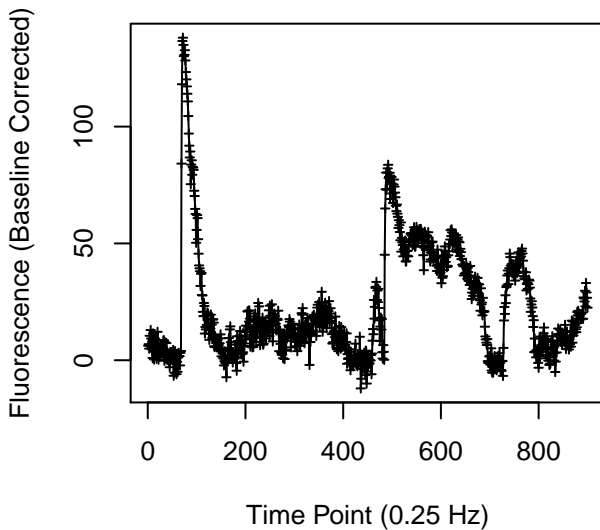

**Cell 153**

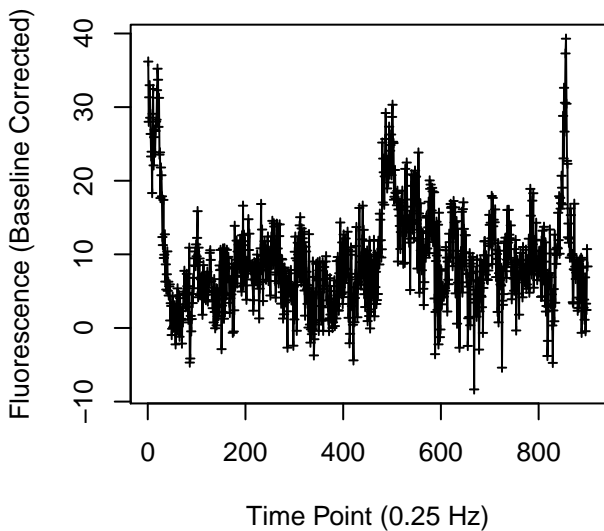

**Cell 154**

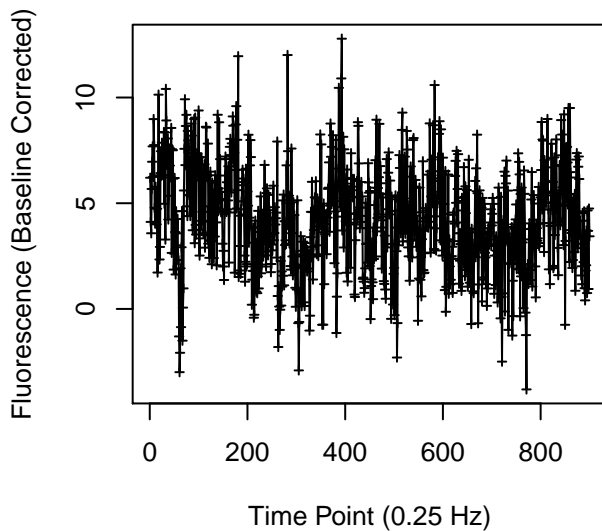

**Cell 155**

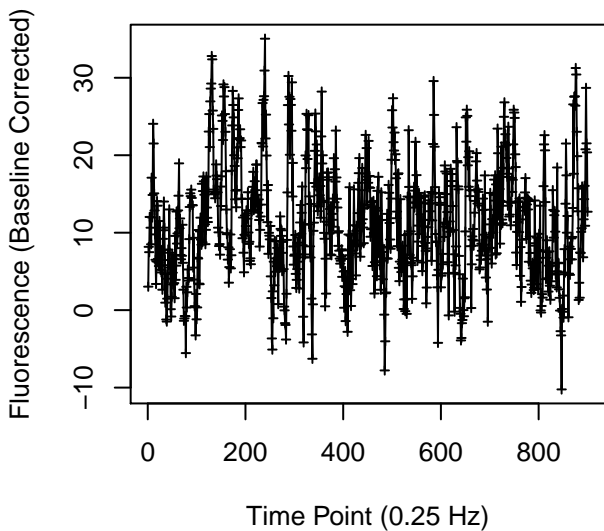

**Cell 156**

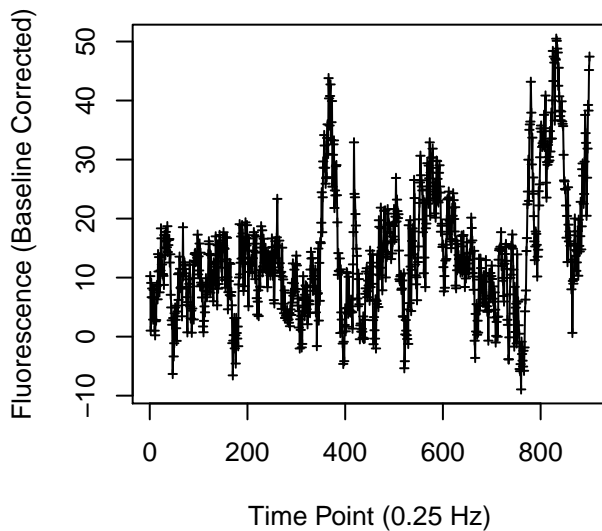

**Cell 157**

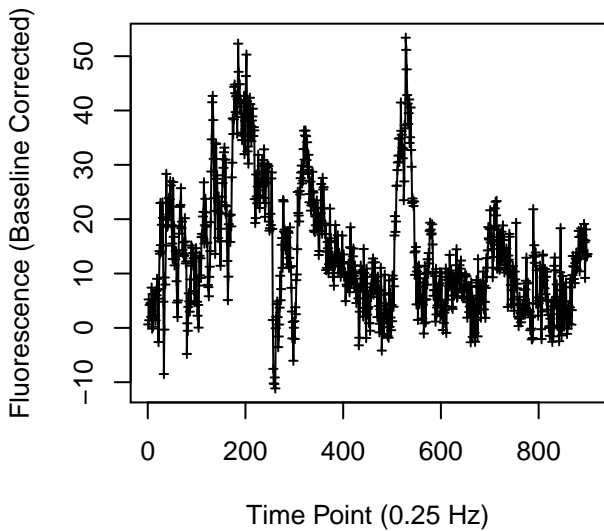

**Cell 158**

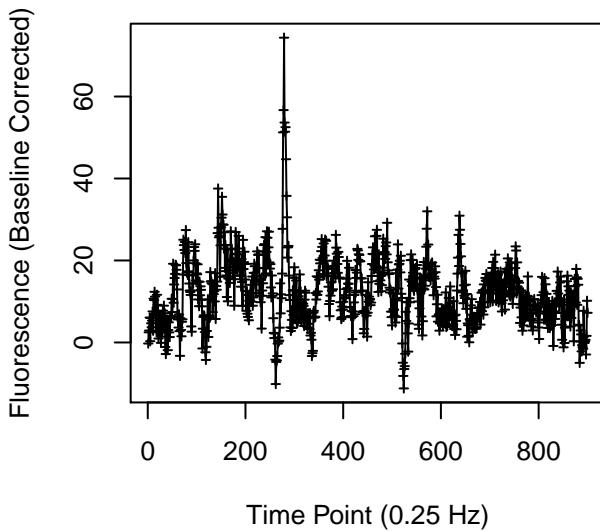

**Cell 159**

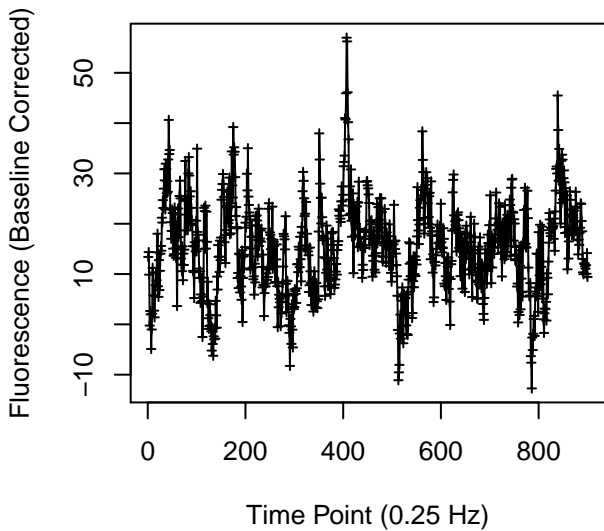

**Cell 160**

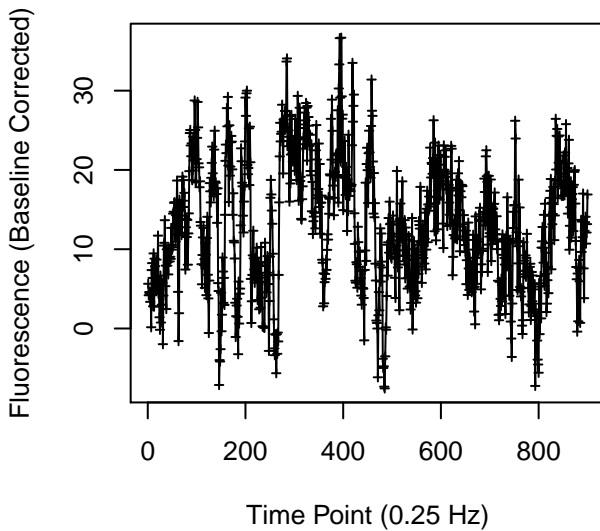

**Cell 161**

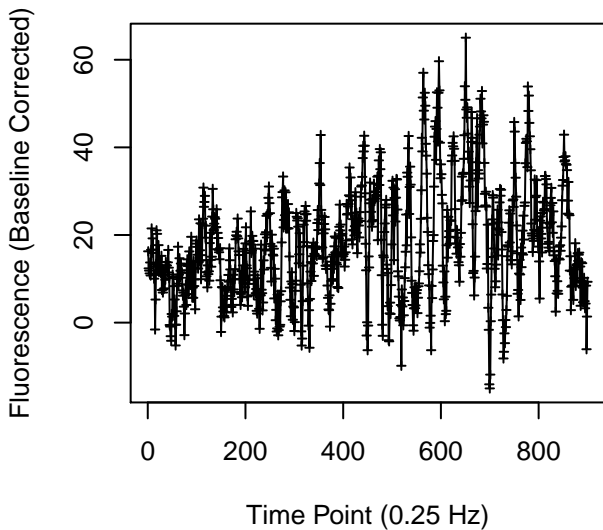

**Cell 162**

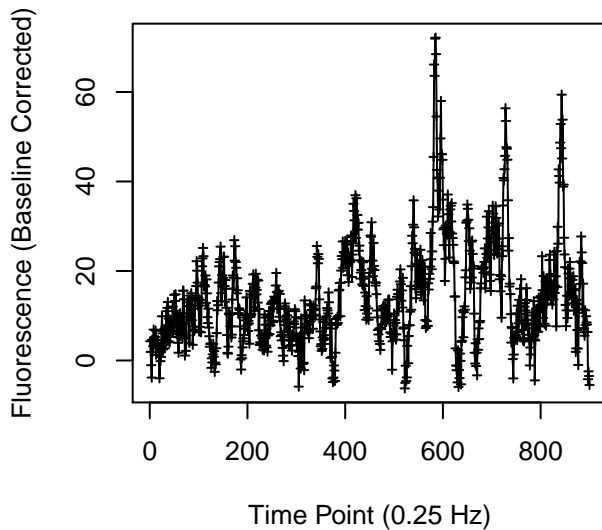

**Cell 163**

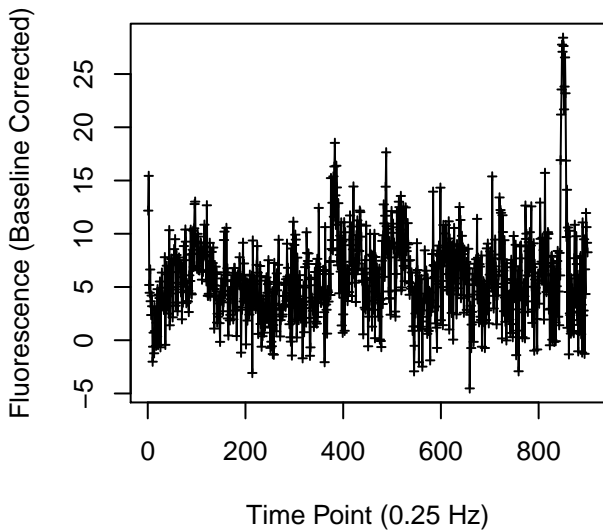

**Cell 164**

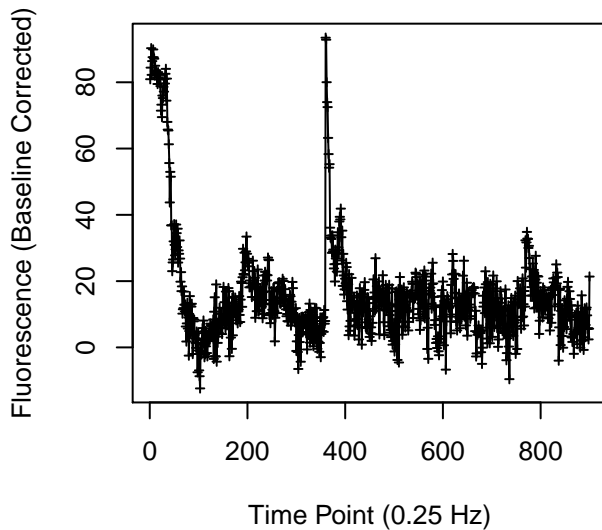

**Cell 165**

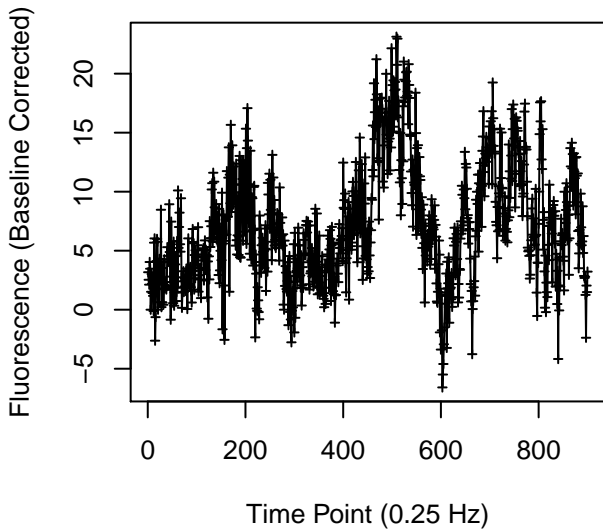

**Cell 166**

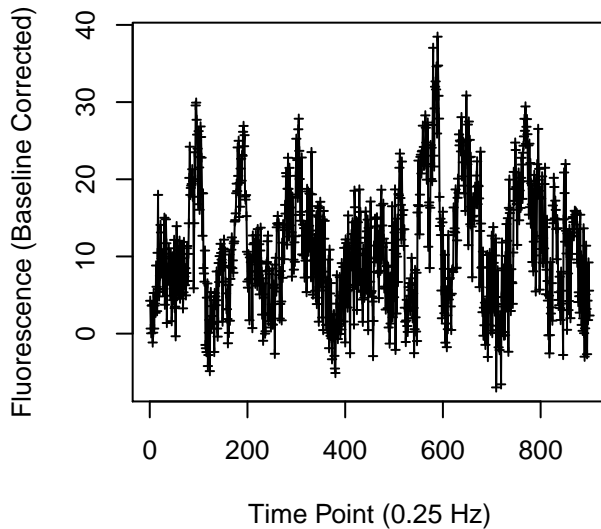

**Cell 167**

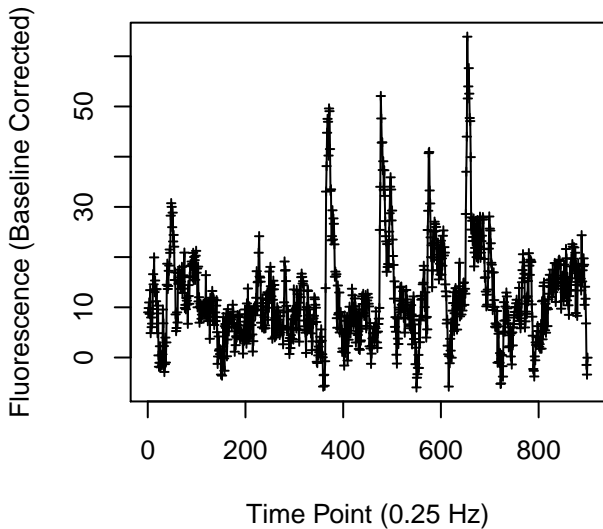

**Cell 168**

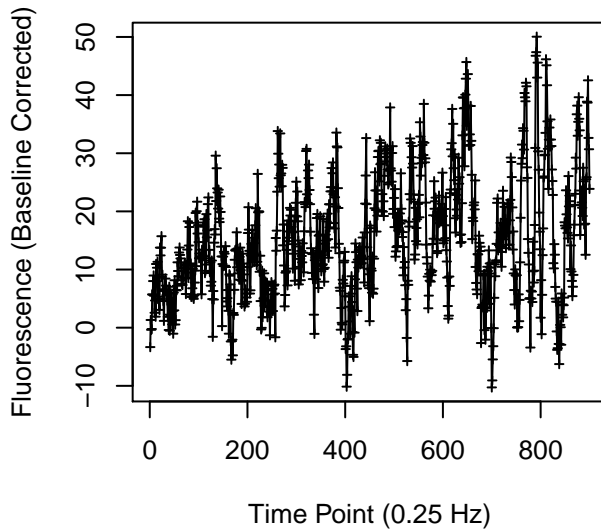

**Cell 169**

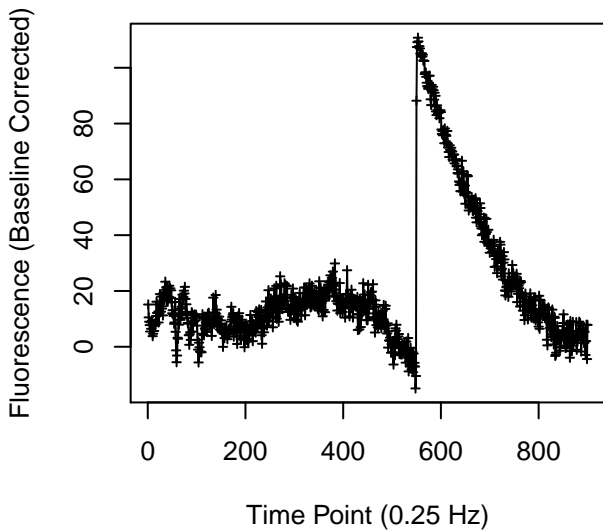

**Cell 170**

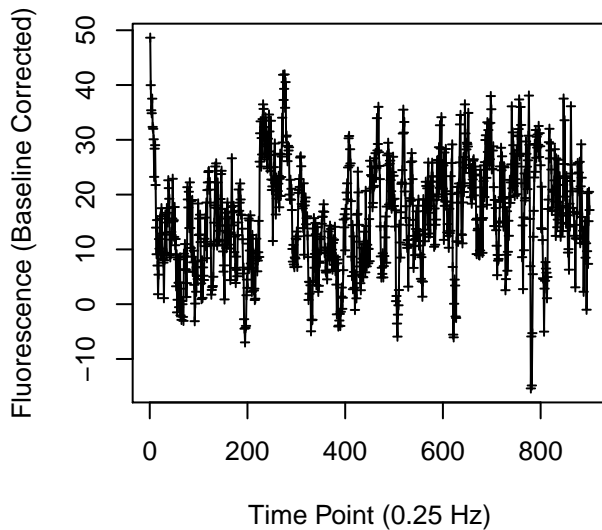

**Cell 171**

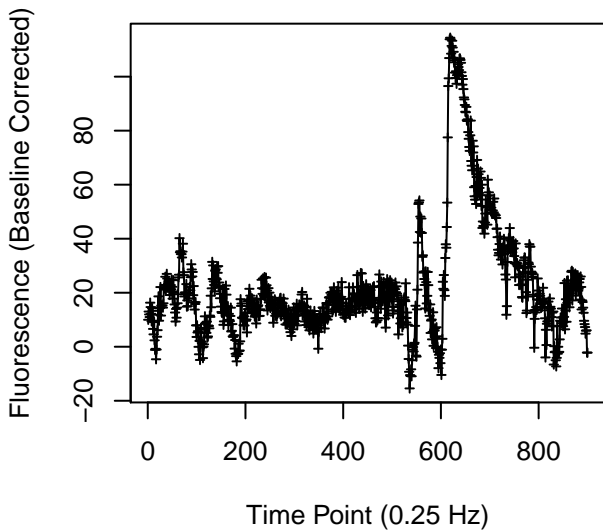

**Cell 172**

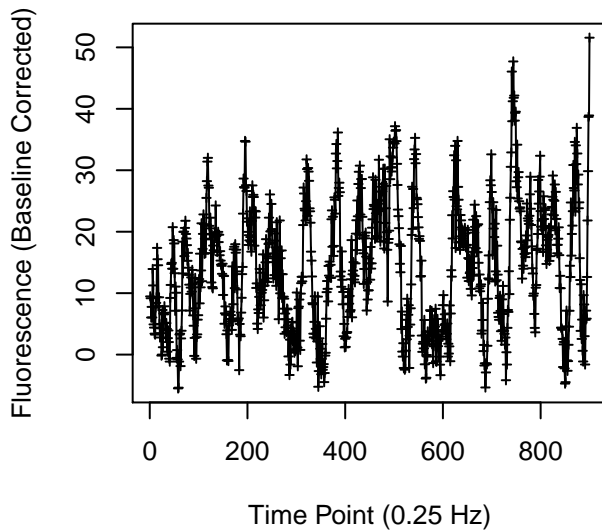

**Cell 173**

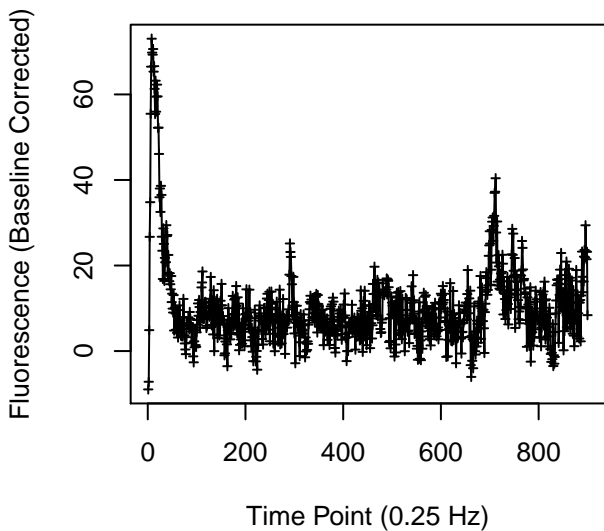

**Cell 174**

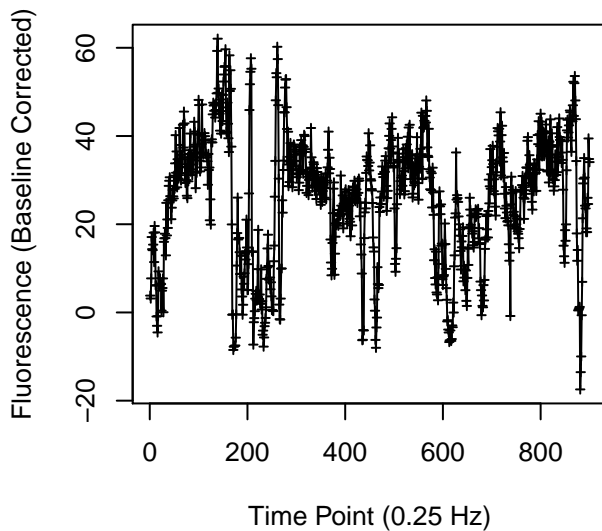

**Cell 175**

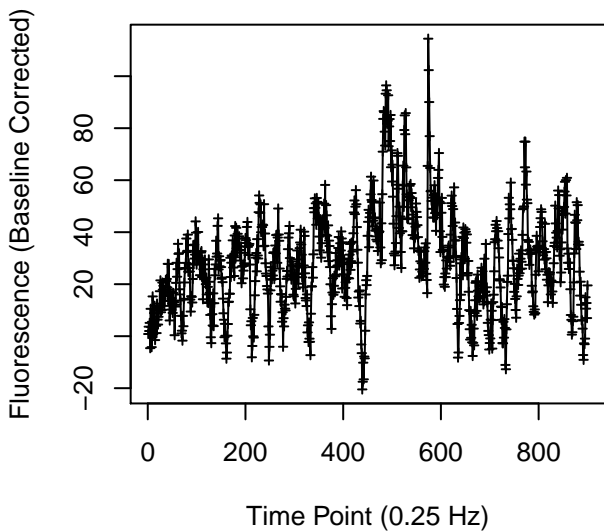

**Cell 176**

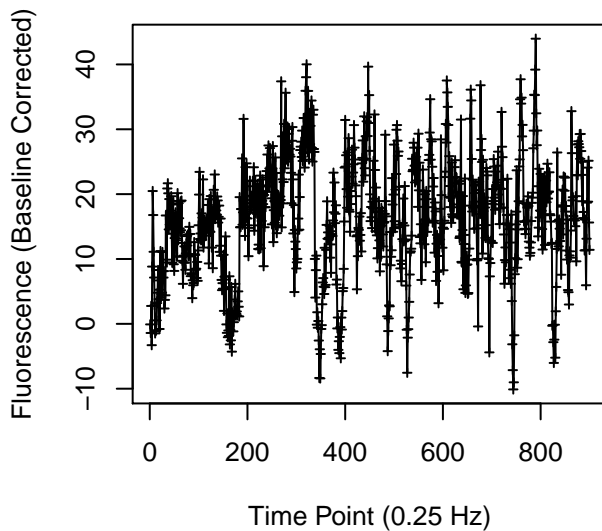

**Cell 177**

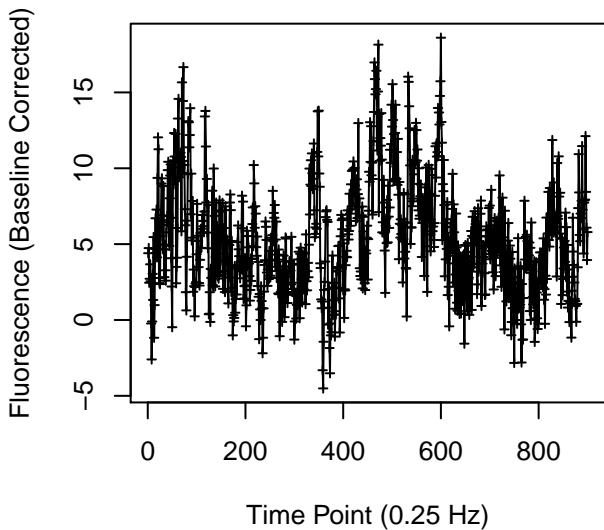

**Cell 178**

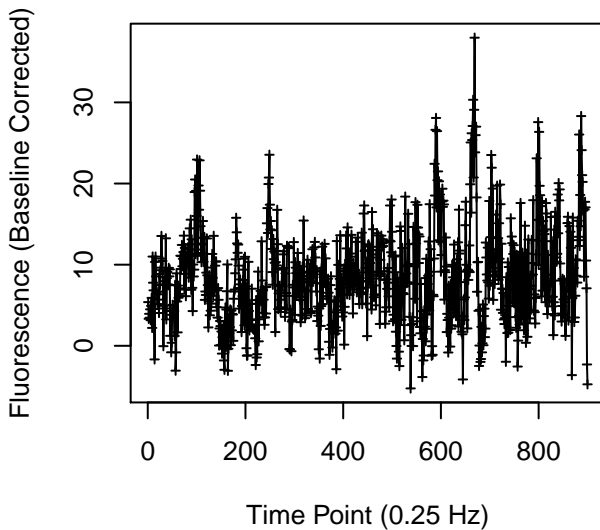

**Cell 179**

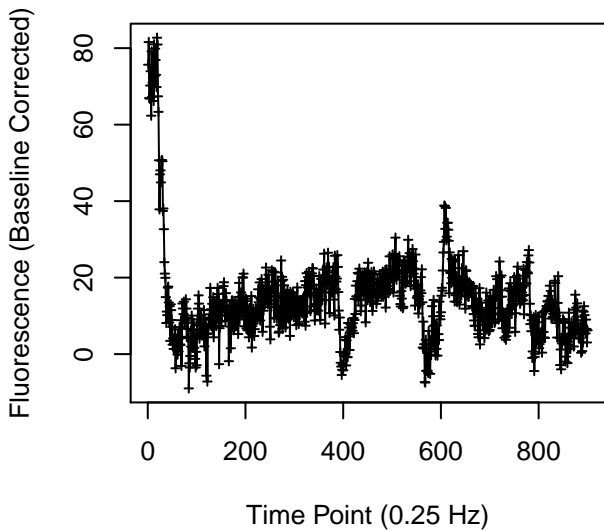

**Cell 180**

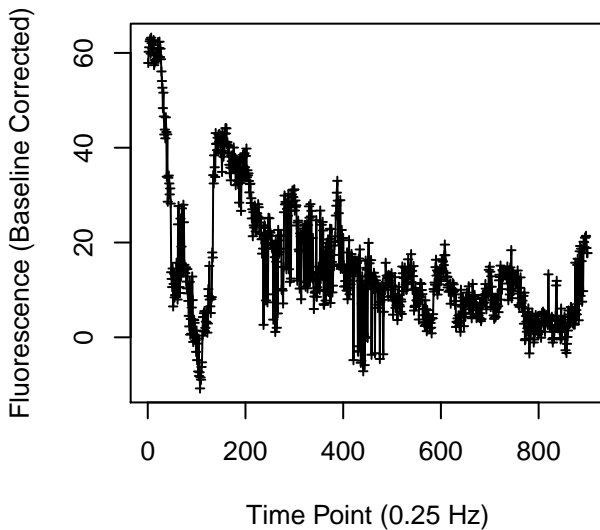

**Cell 181**

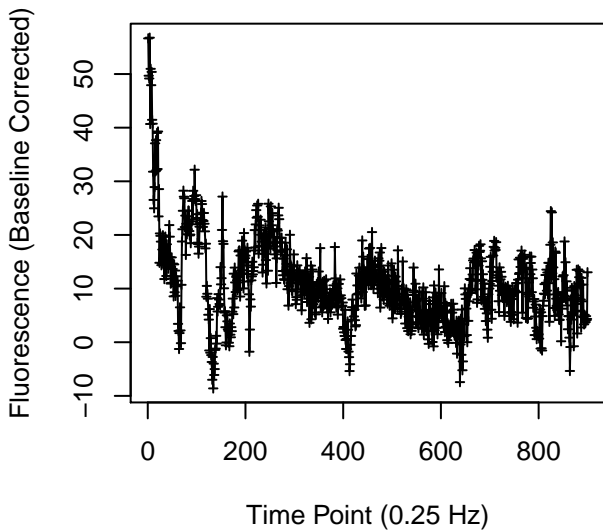

**Cell 182**

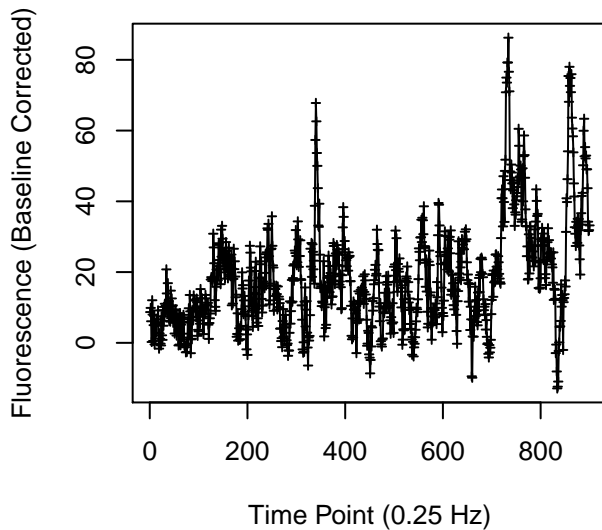

**Cell 183**

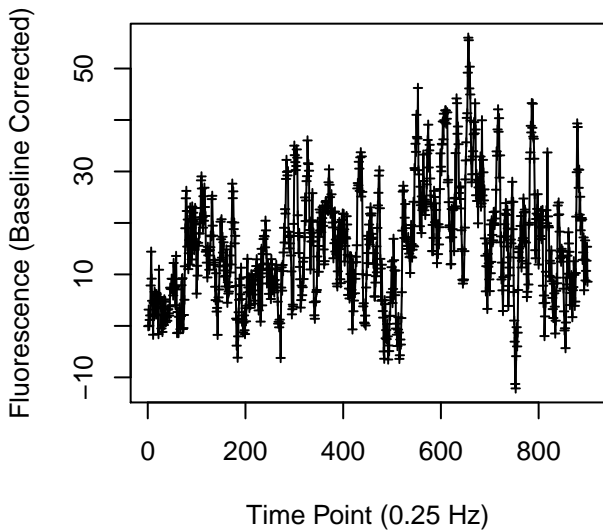

**Cell 184**

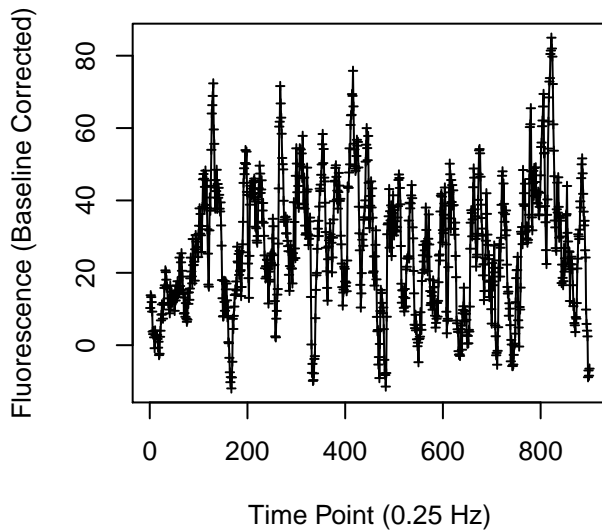

**Cell 185**

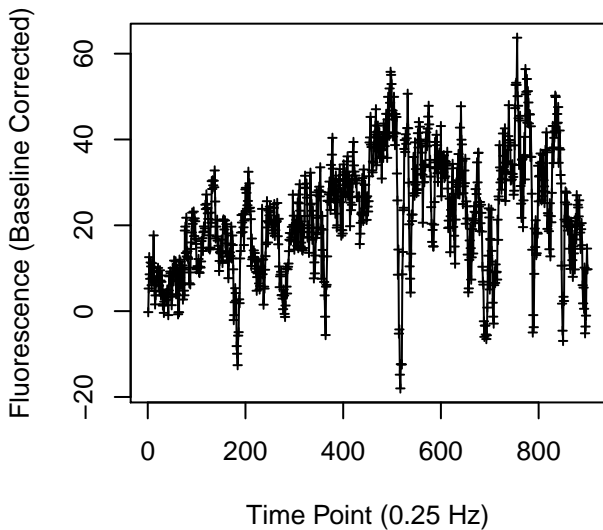

**Cell 186**

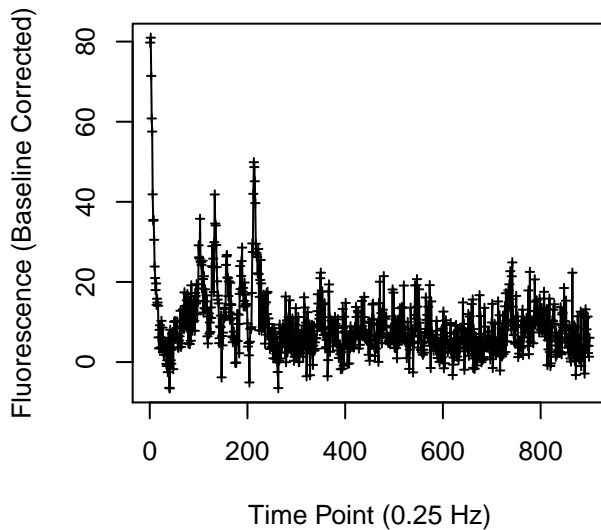

**Cell 187**

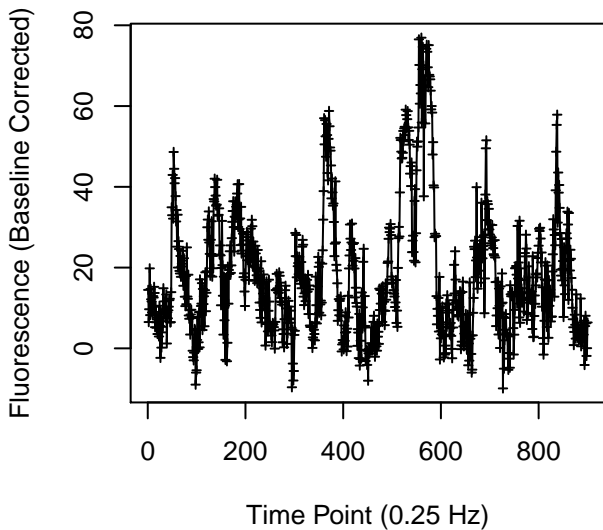

**Cell 188**

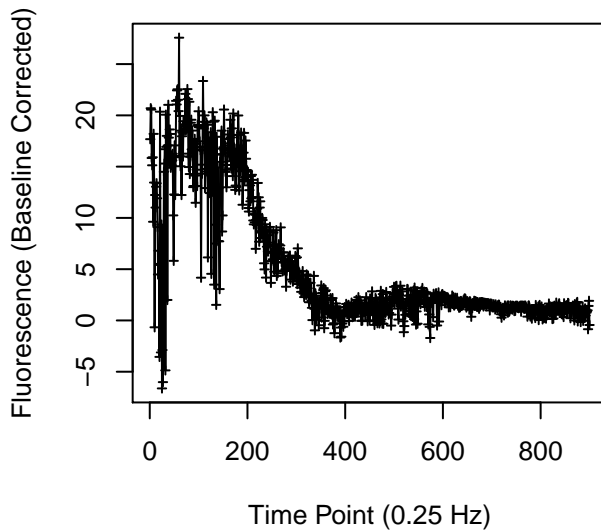

**Cell 189**

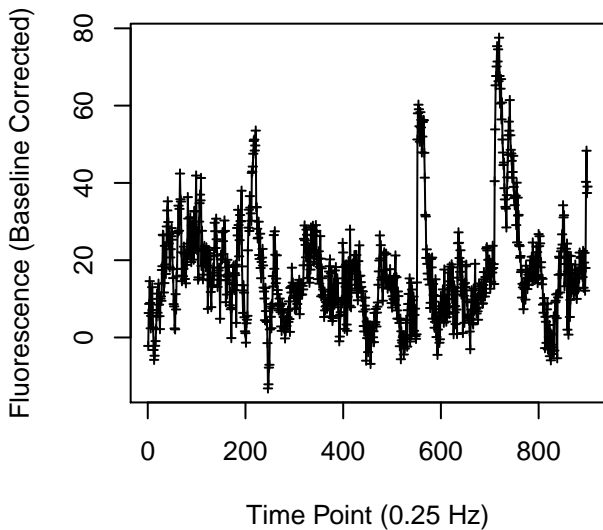

**Cell 190**

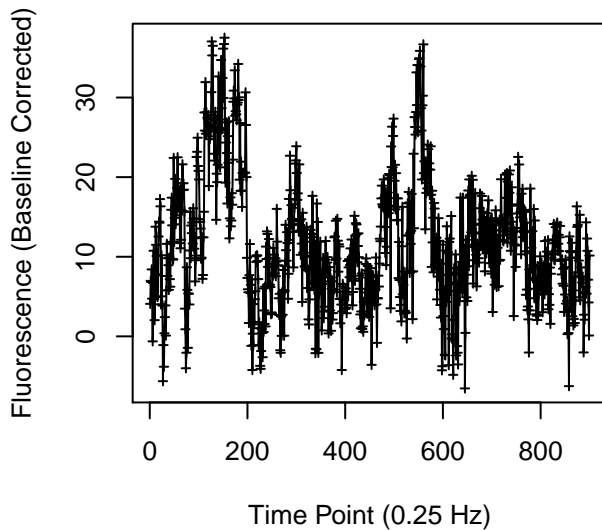

**Cell 191**

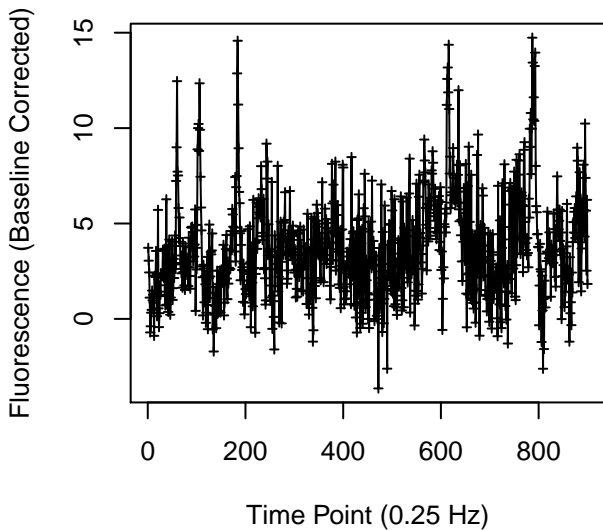

**Cell 192**

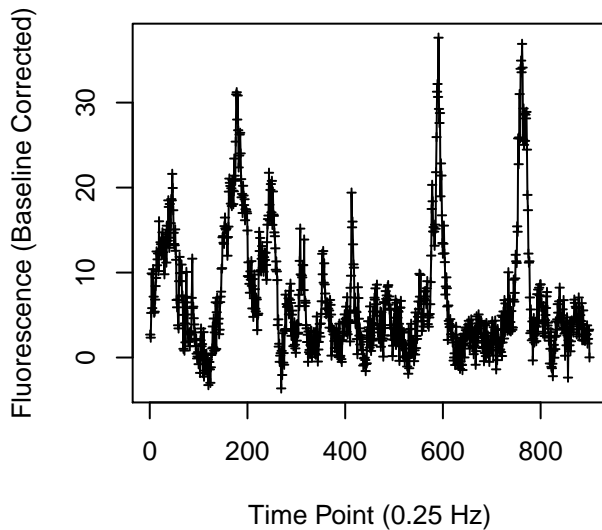

**Cell 193**

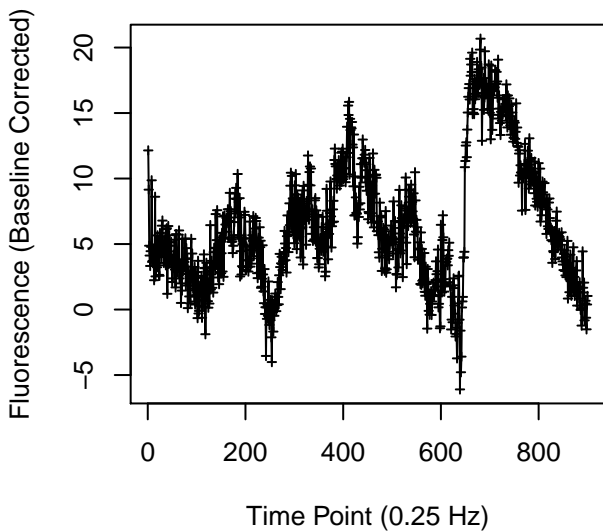

**Cell 194**

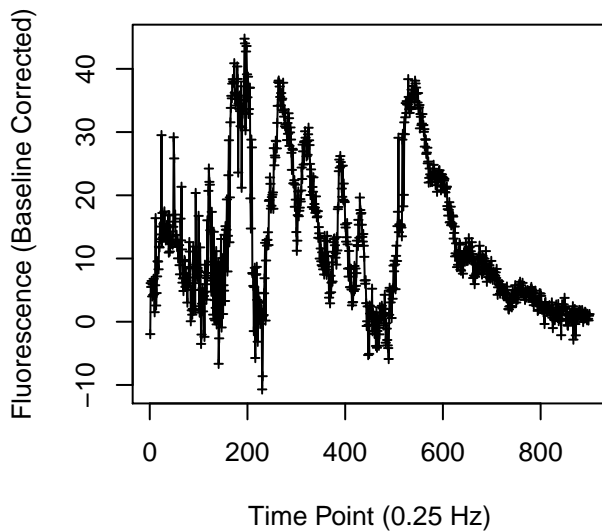

**Cell 195**

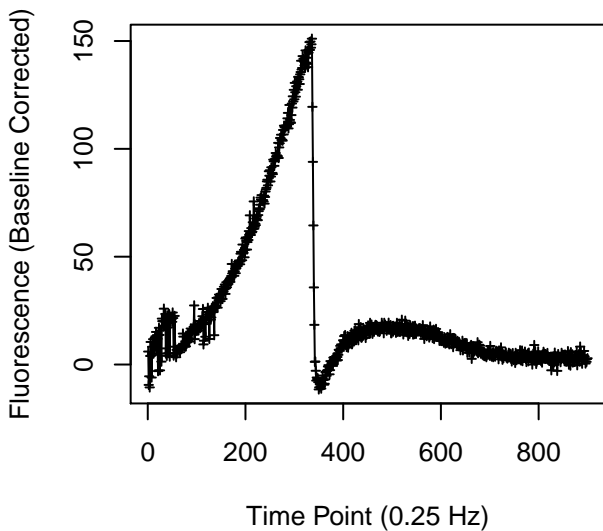

**Cell 196**

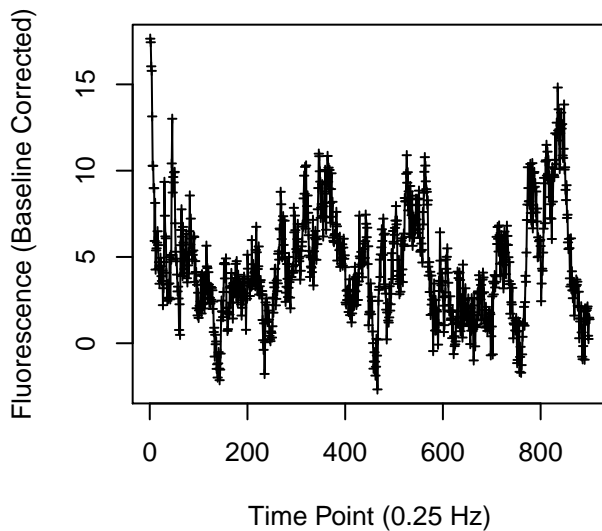

**Cell 197**

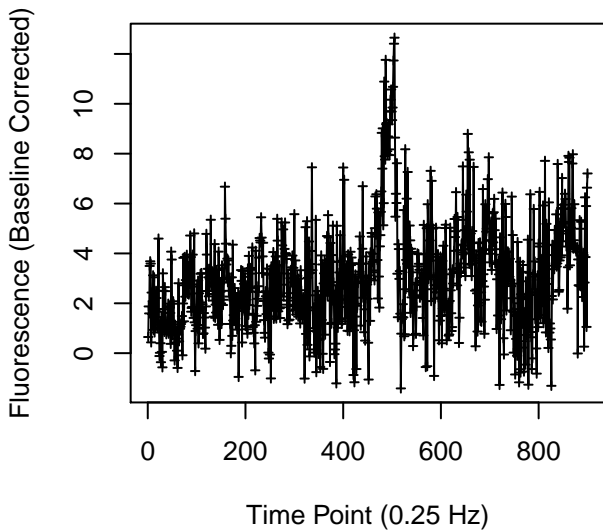

**Cell 198**

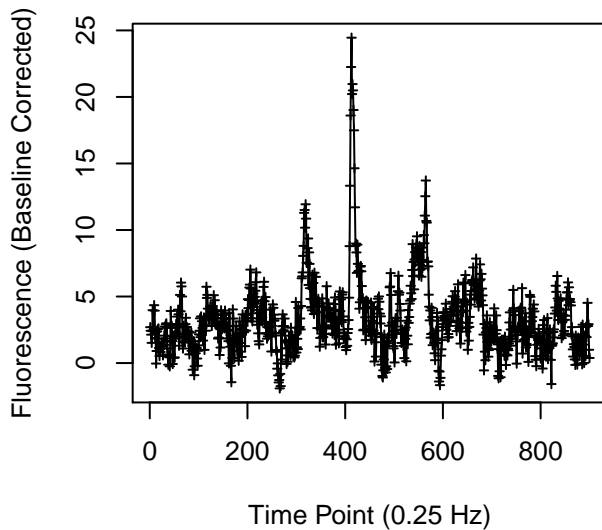

**Cell 199**

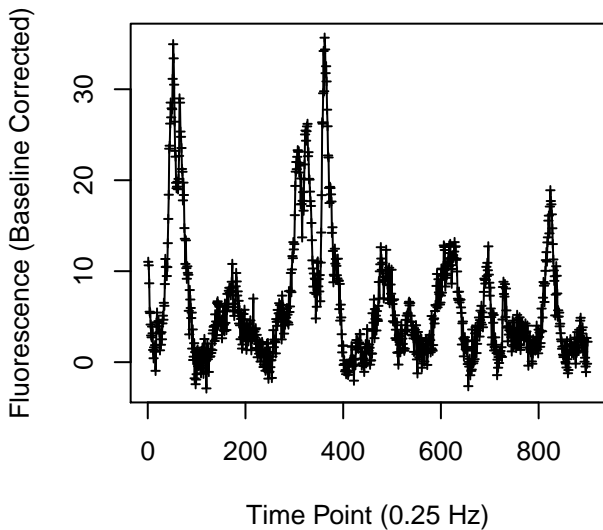

**Cell 200**

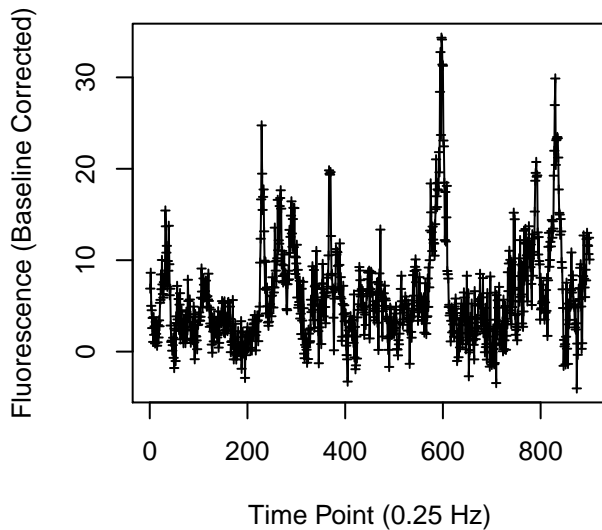

**Cell 201**

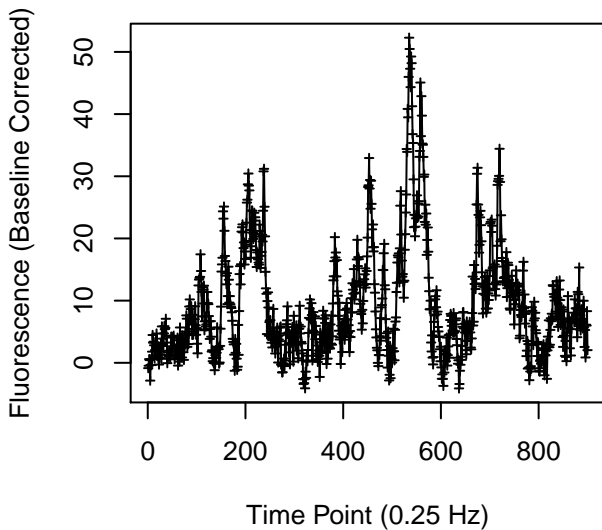

**Cell 202**

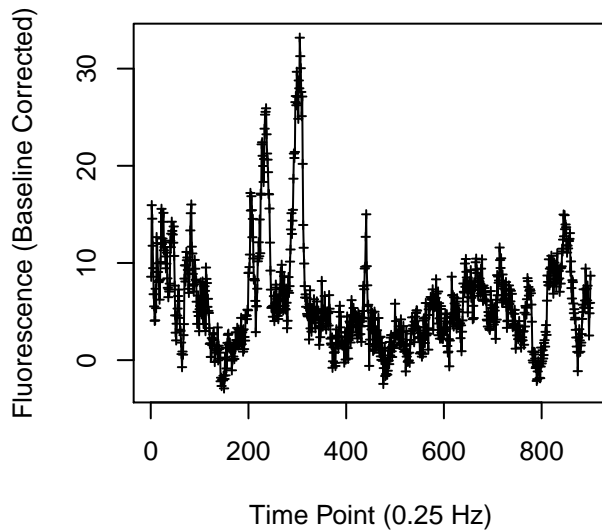

**Cell 203**

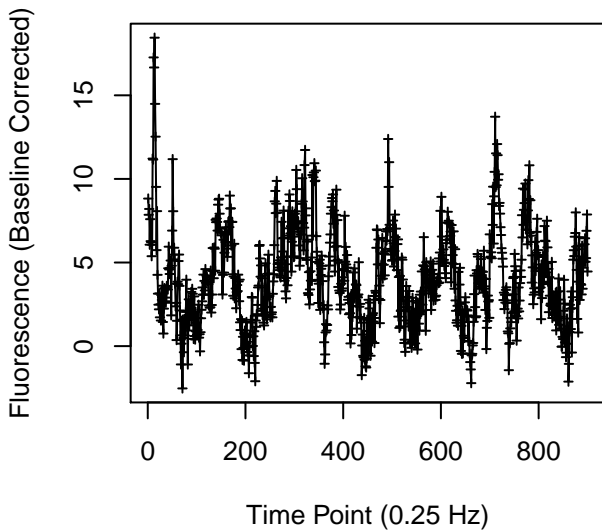

**Cell 204**

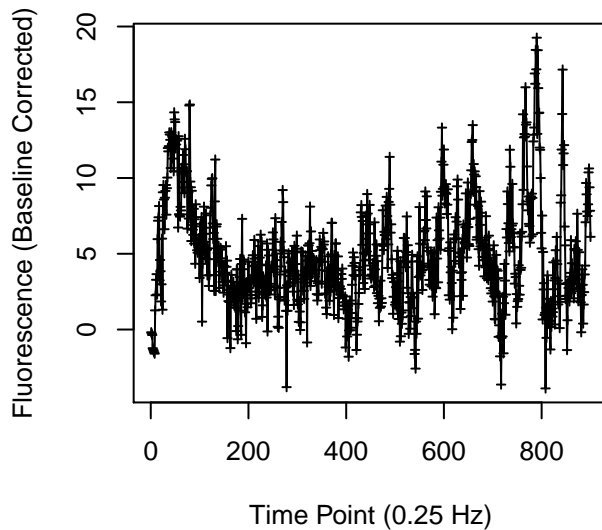

**Cell 205**

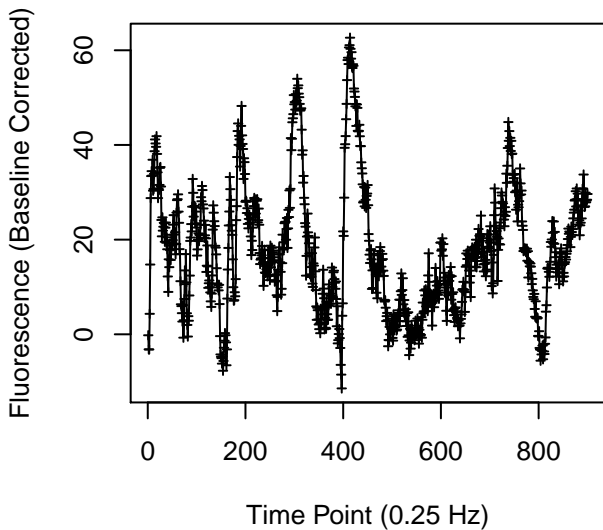

**Cell 206**

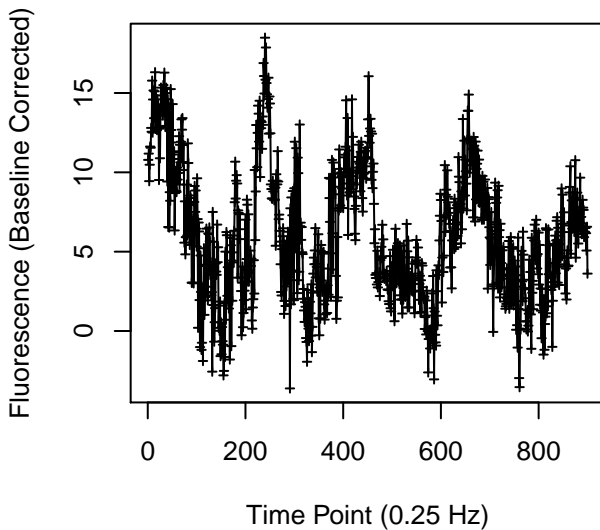

**Cell 207**

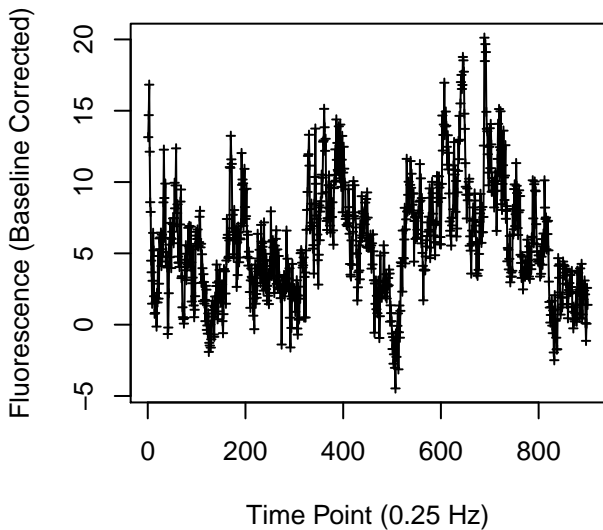

**Cell 208**

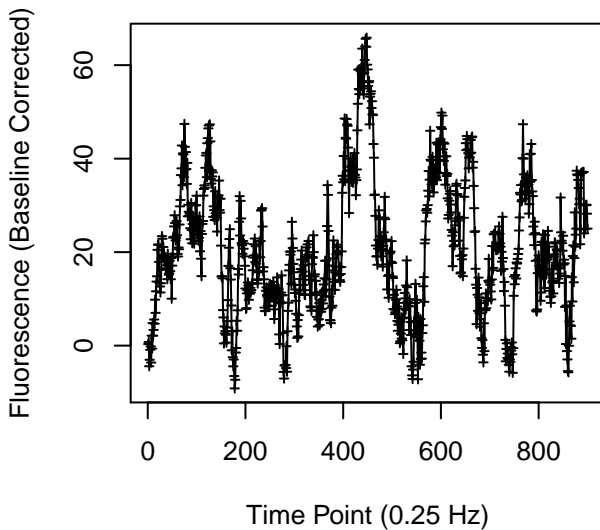

**Cell 209**

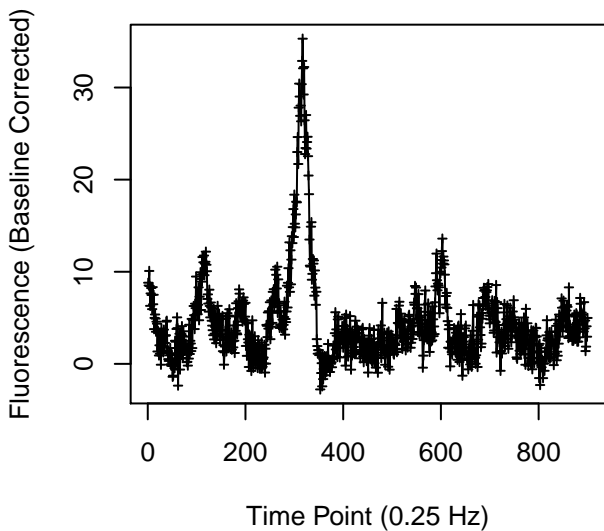

**Cell 210**

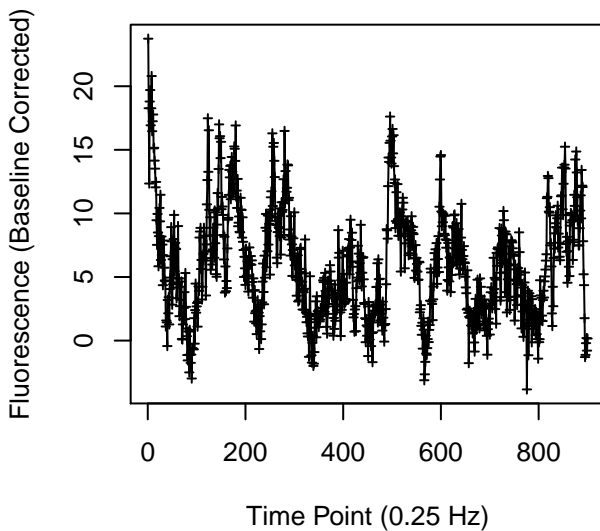

**Cell 211**

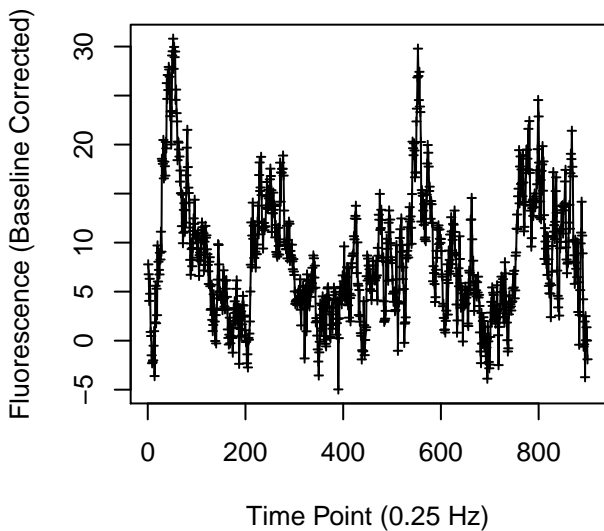

**Cell 212**

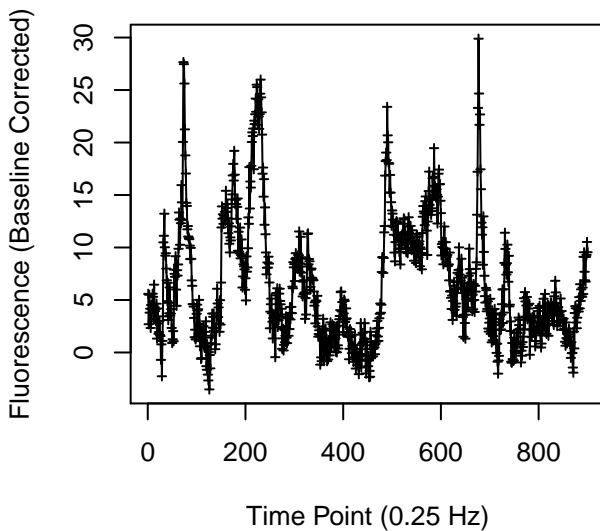

**Cell 213**

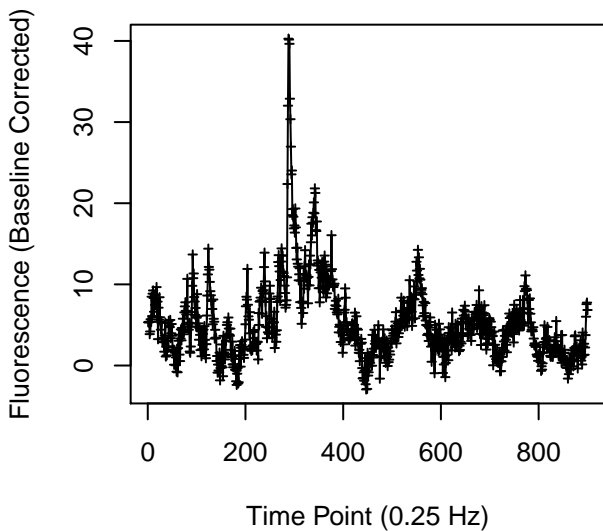

**Cell 214**

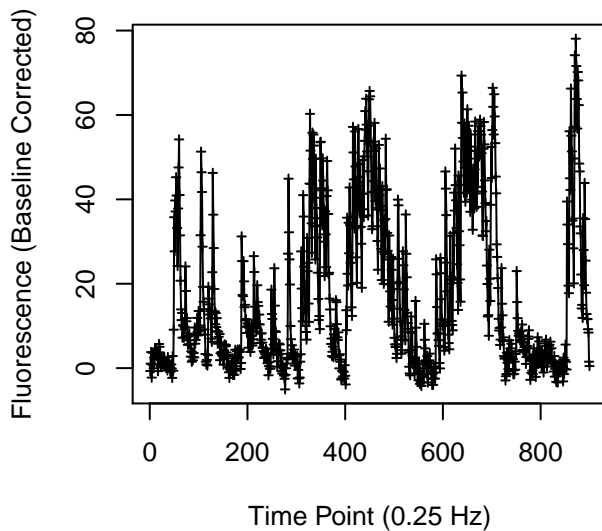

**Cell 215**

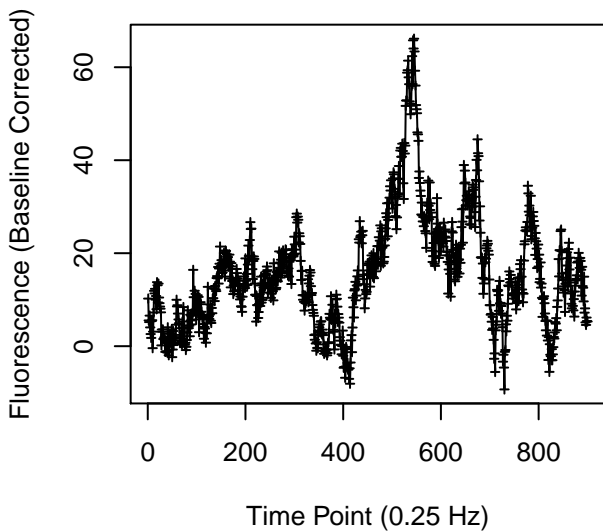

**Cell 216**

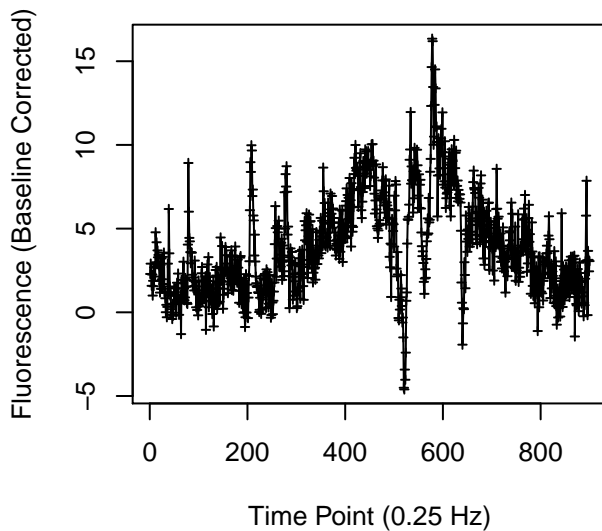

**Cell 217**

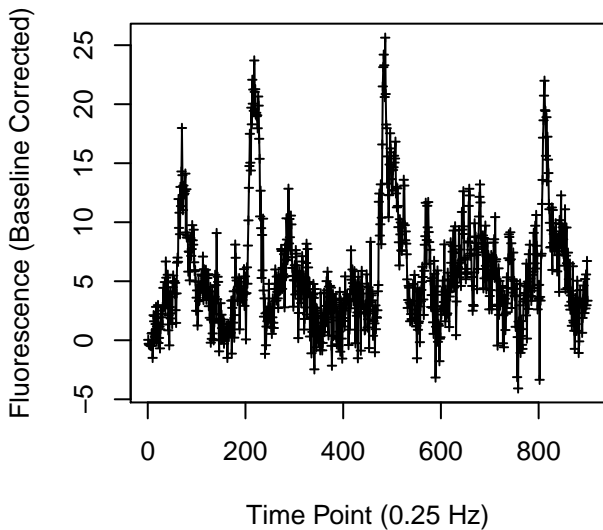

**Cell 218**

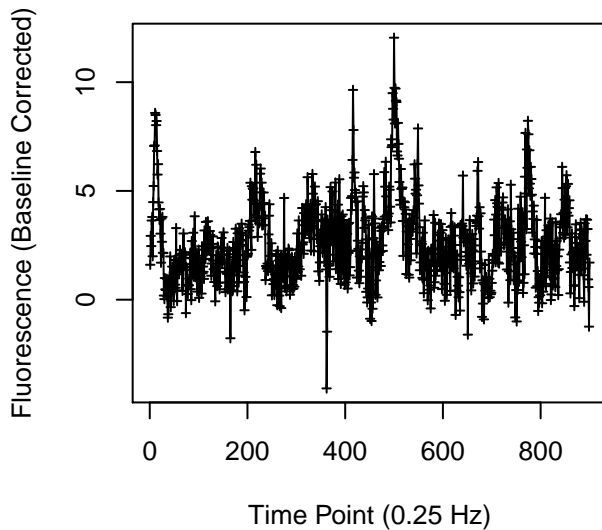

**Cell 219**

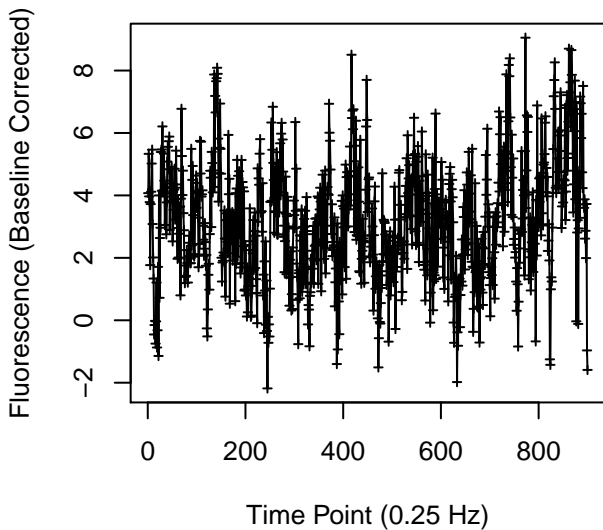

**Cell 220**

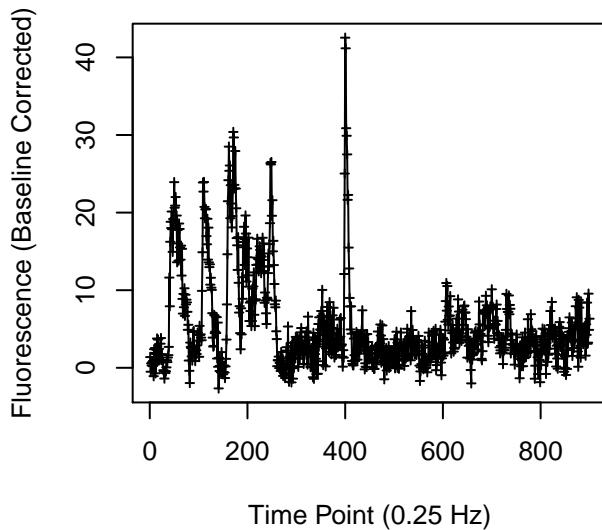

**Cell 221**

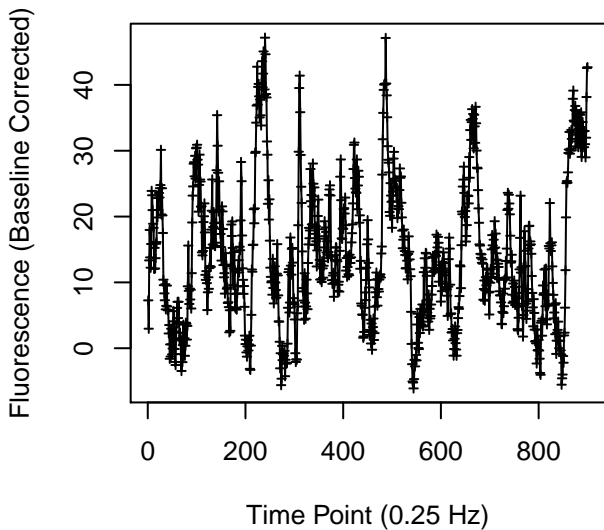

**Cell 222**

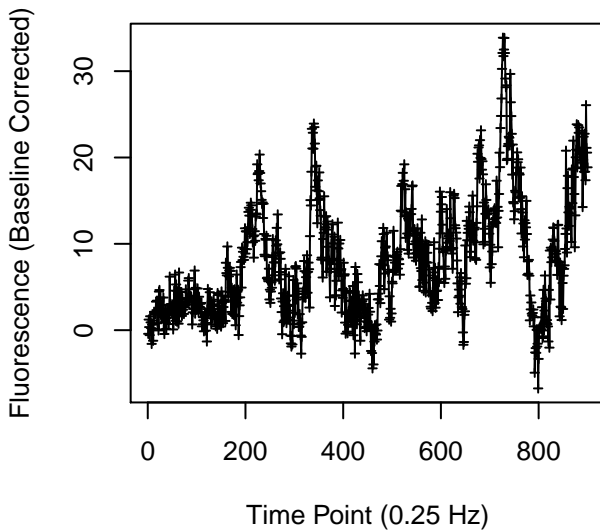

**Cell 223**

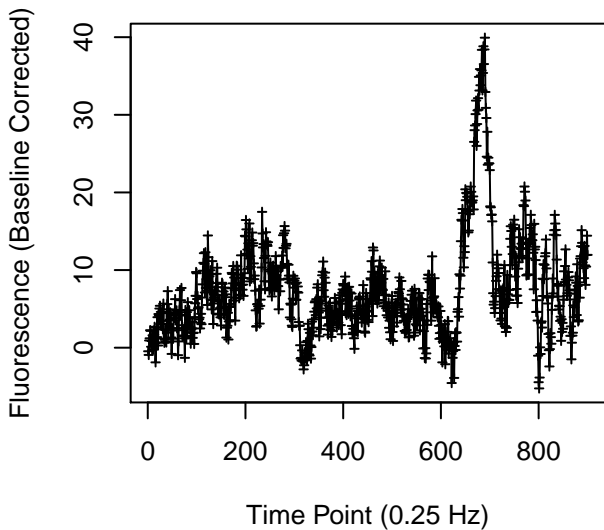

**Cell 224**

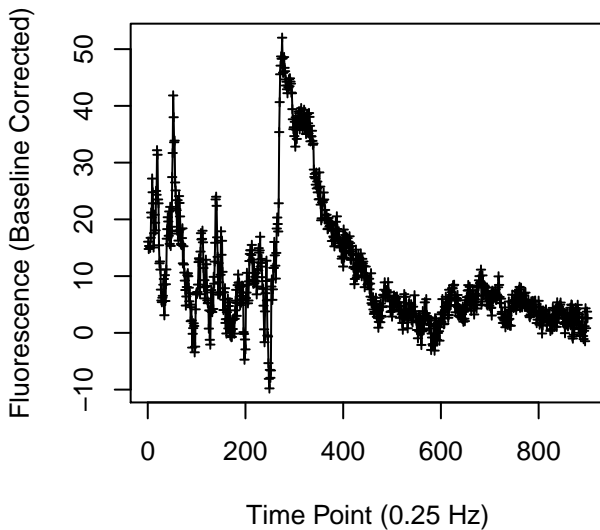

**Cell 225**

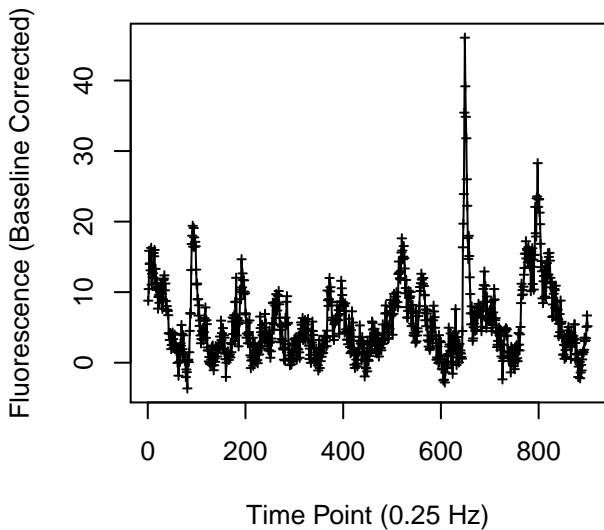

**Cell 226**

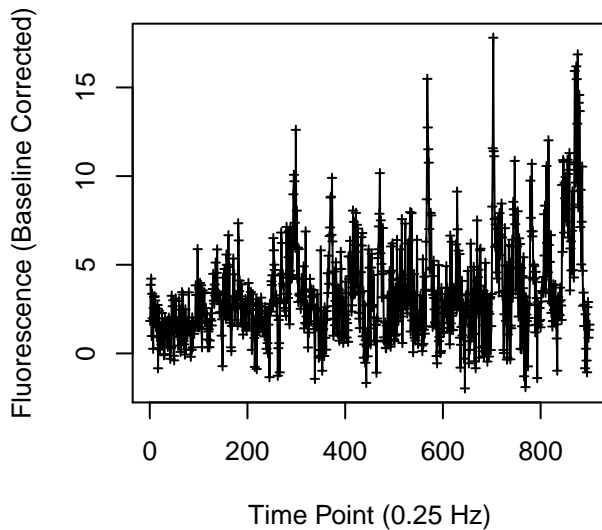

**Cell 227**

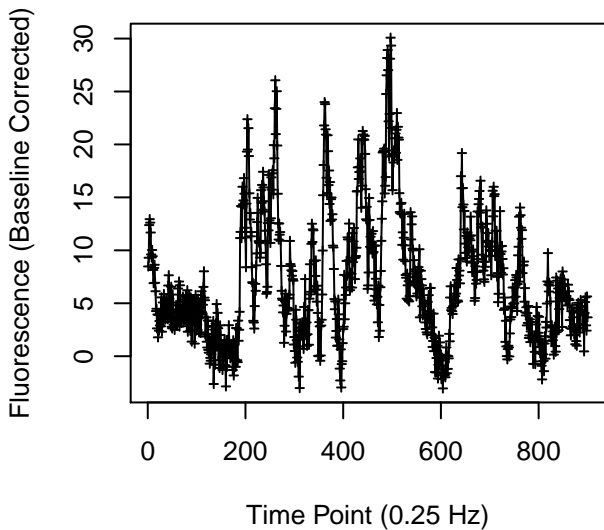

**Cell 228**

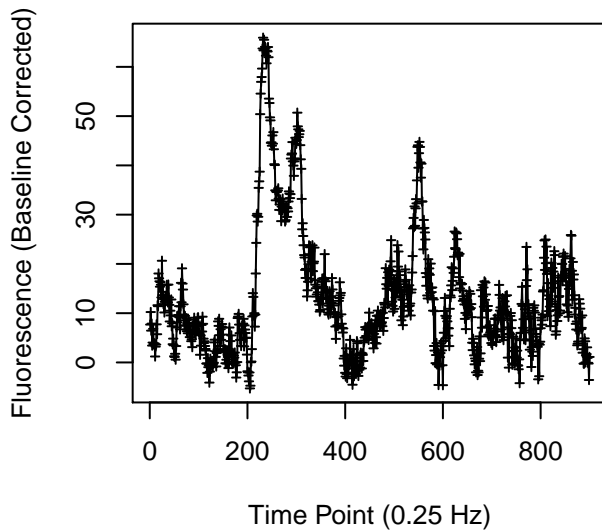

**Cell 229**

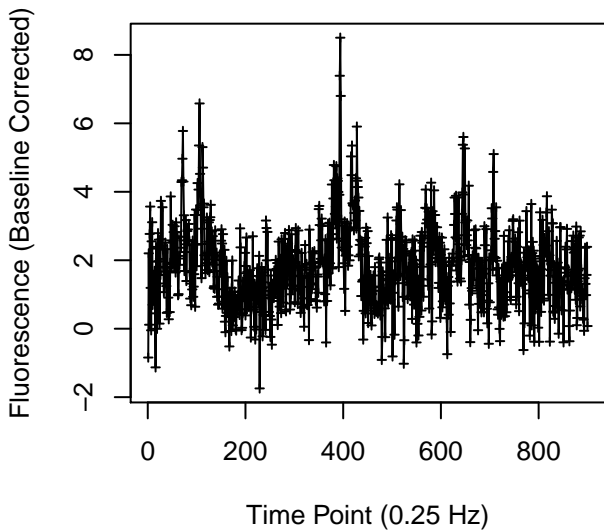

**Cell 230**

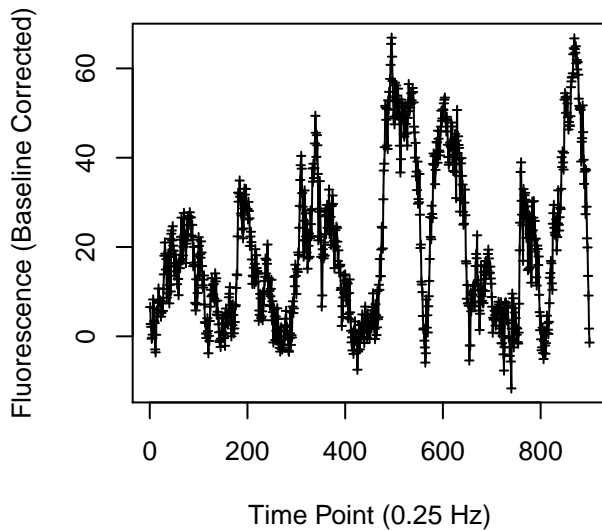

**Cell 231**

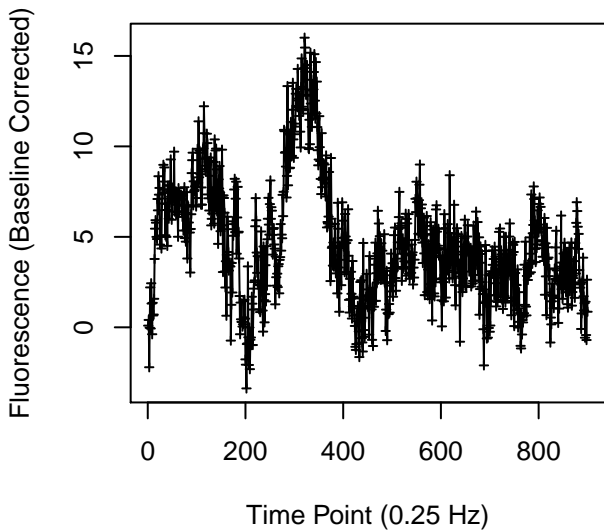

**Cell 232**

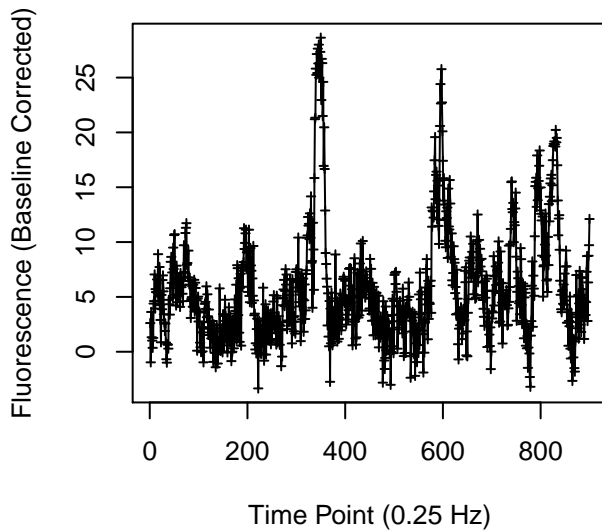

**Cell 233**

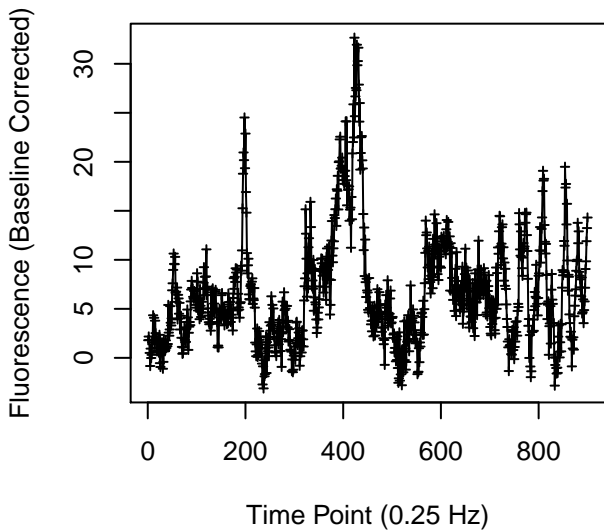

**Cell 234**

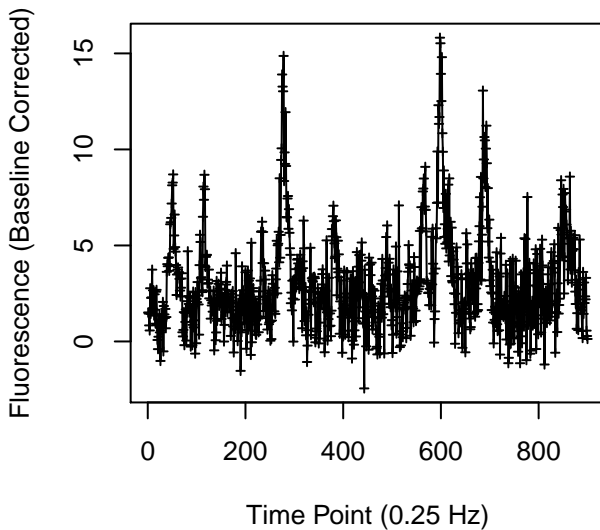

**Cell 235**

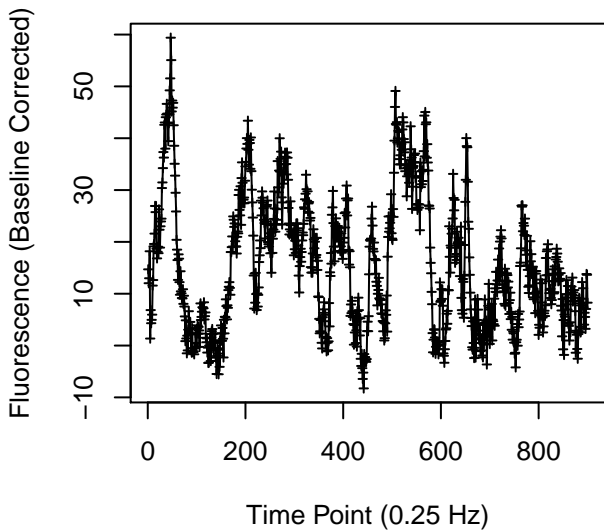

**Cell 236**

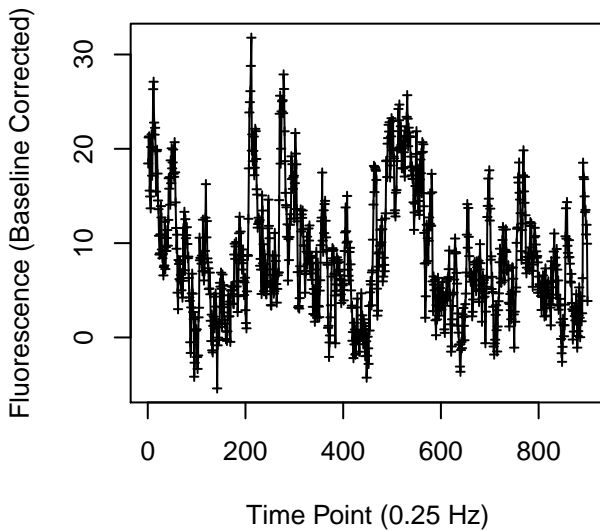

**Cell 237**

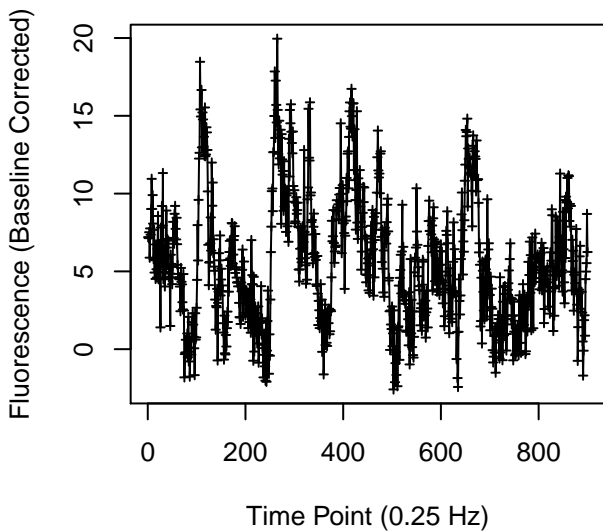

**Cell 238**

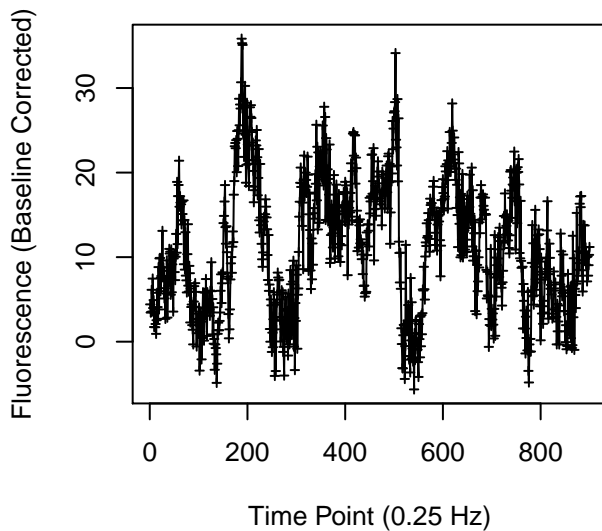

**Cell 239**

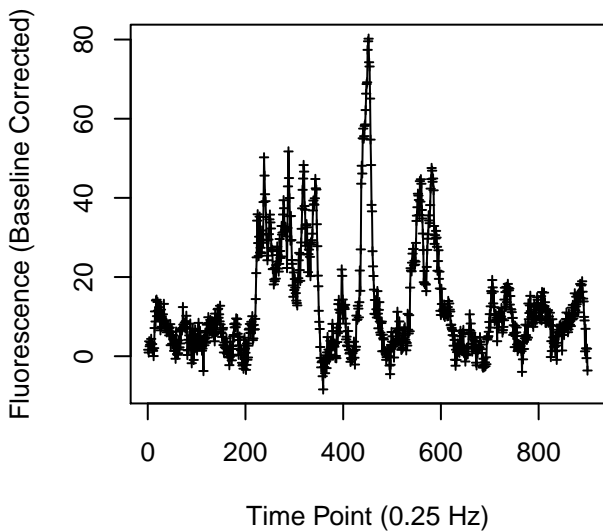

**Cell 240**

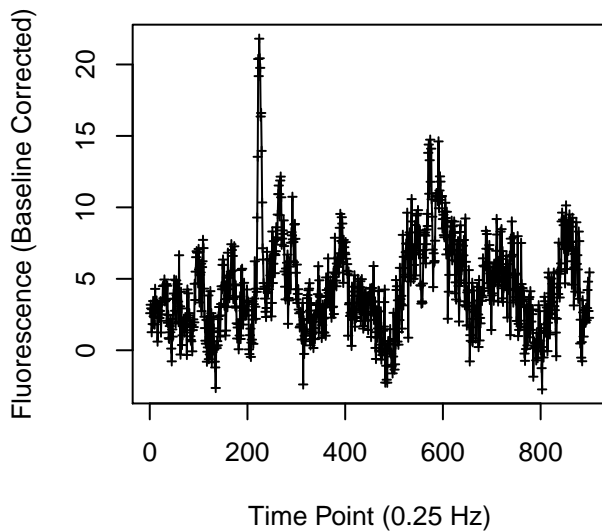

**Cell 241**

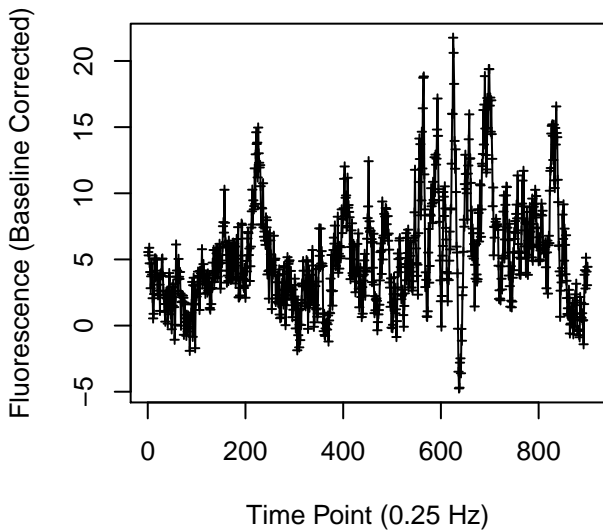

**Cell 242**

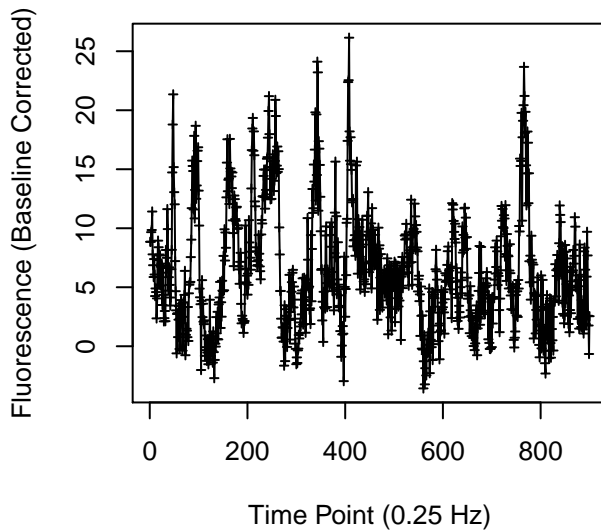

**Cell 243**

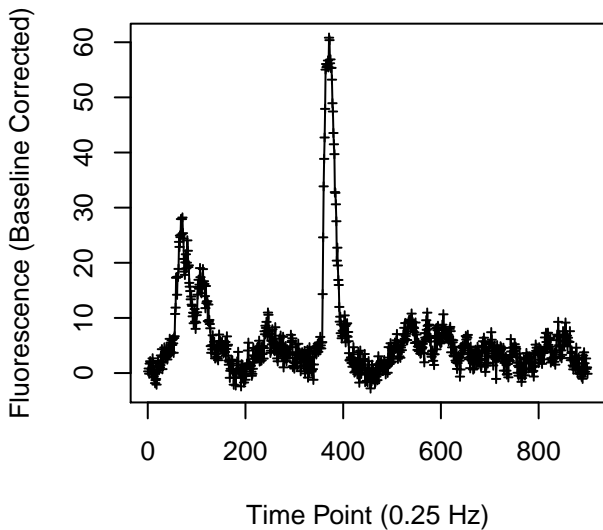

**Cell 244**

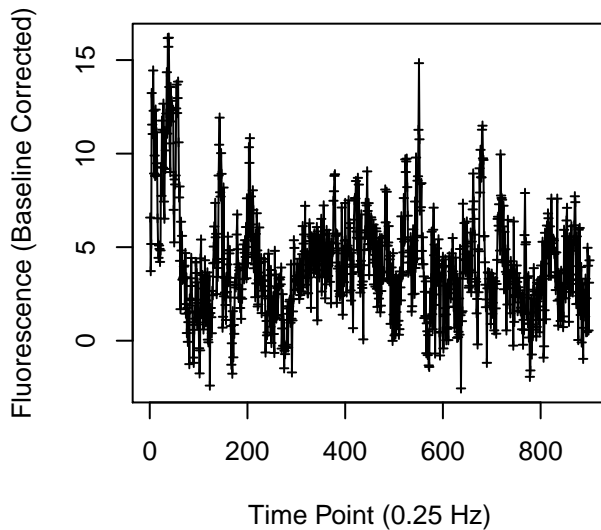

**Cell 245**

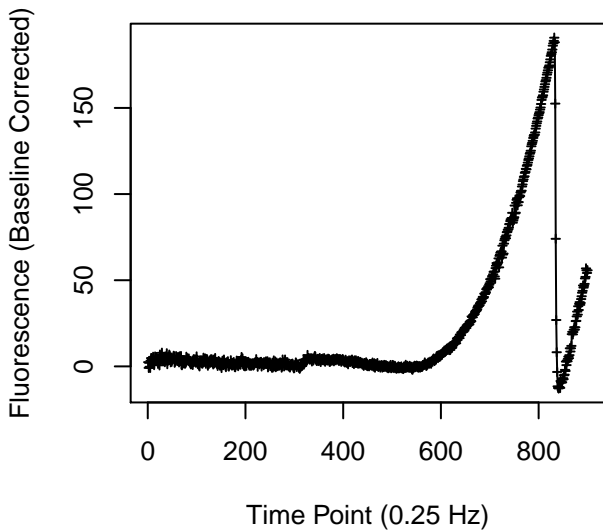

**Cell 246**

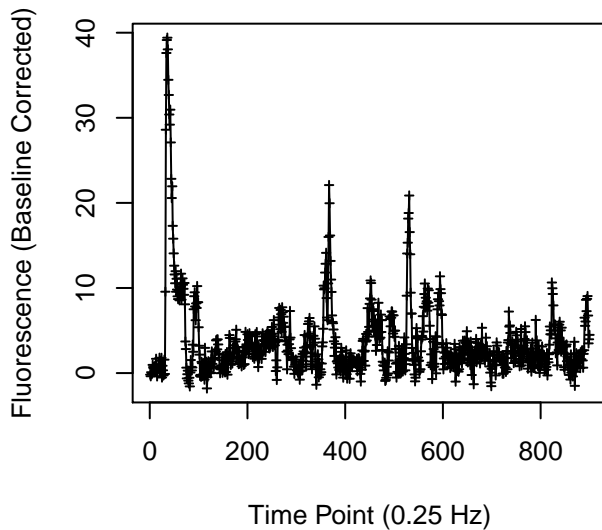

**Cell 247**

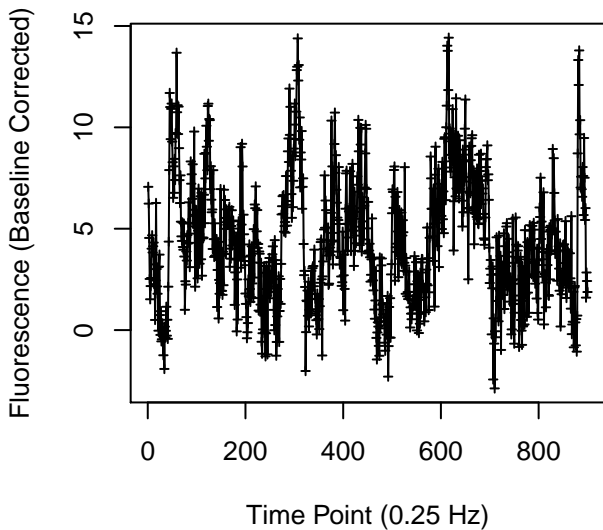

**Cell 248**

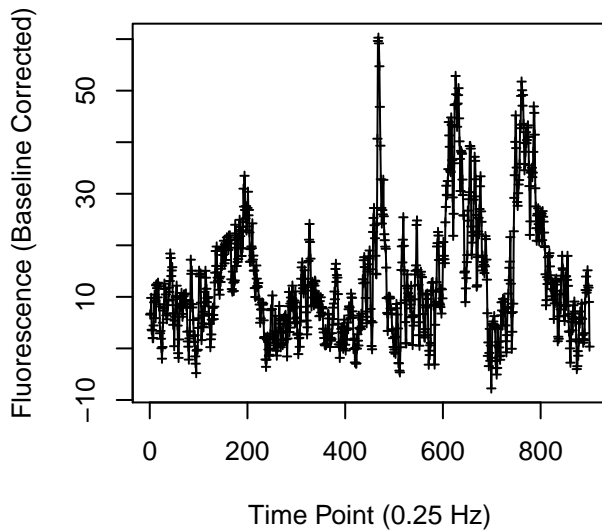

**Cell 249**

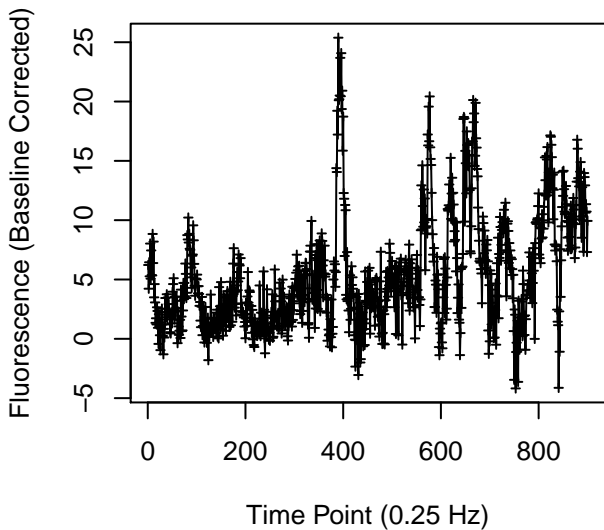

**Cell 250**

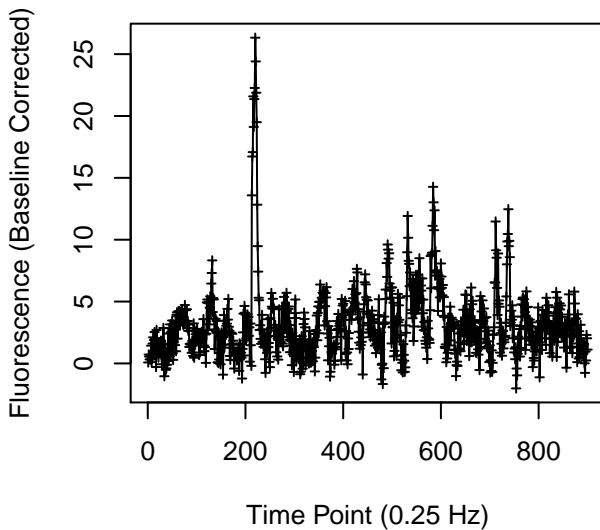

**Cell 251**

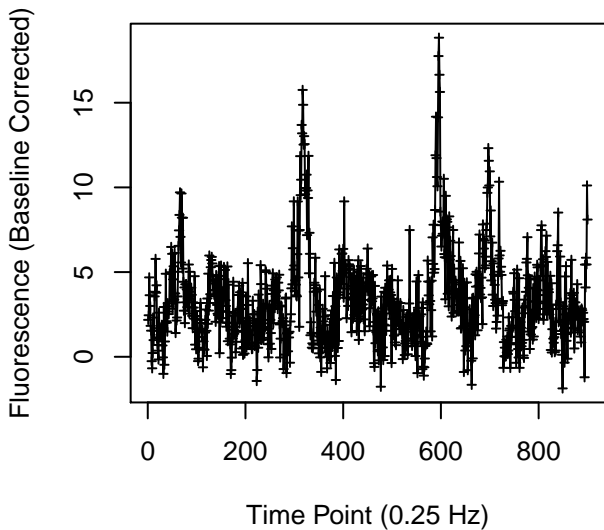

**Cell 252**

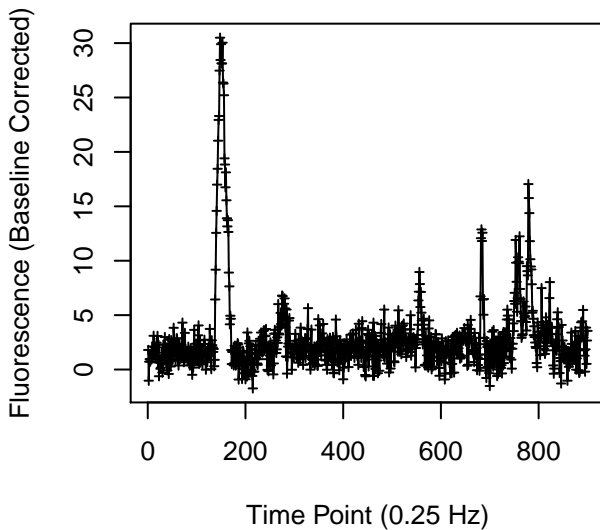

**Cell 253**

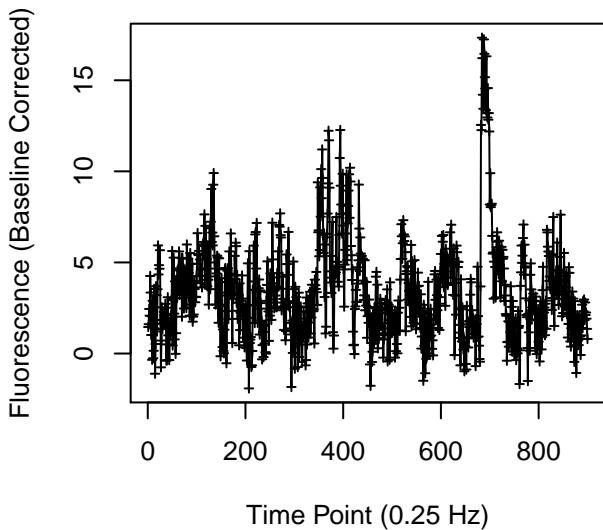

**Cell 254**

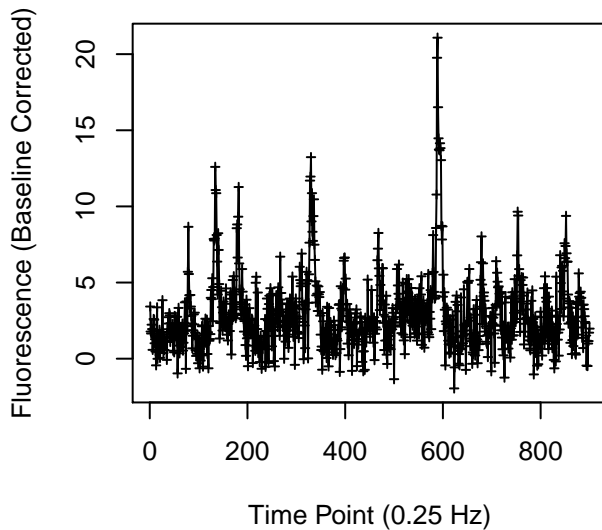

**Cell 255**

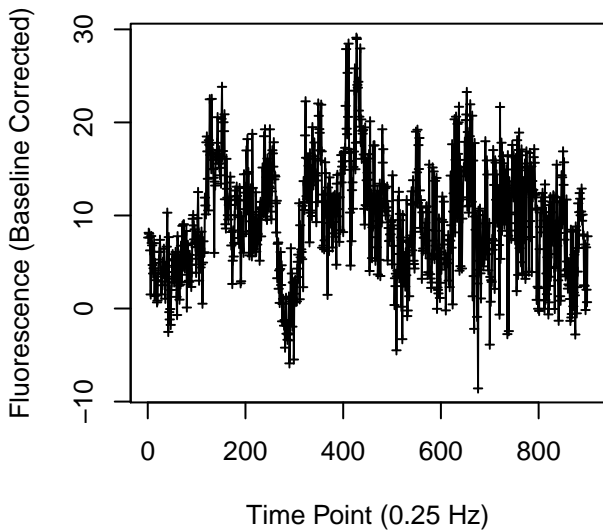

**Cell 256**

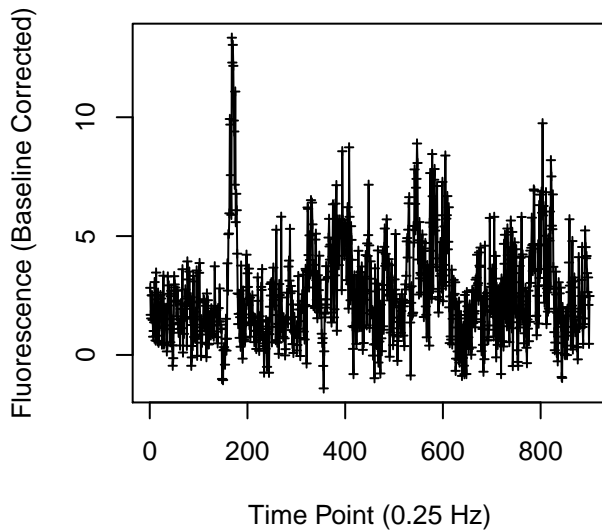

**Cell 257**

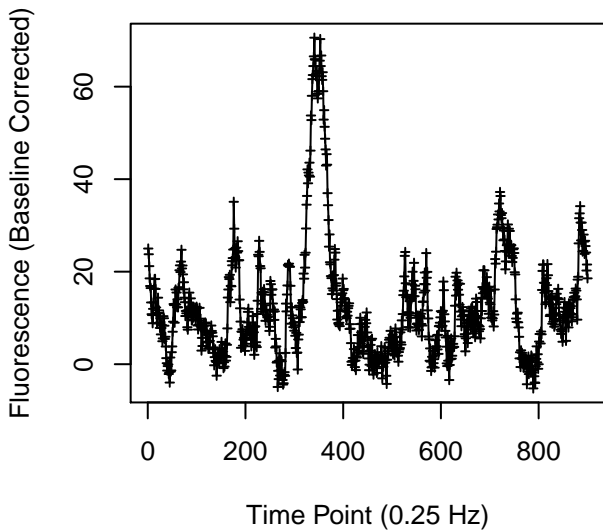

**Cell 258**

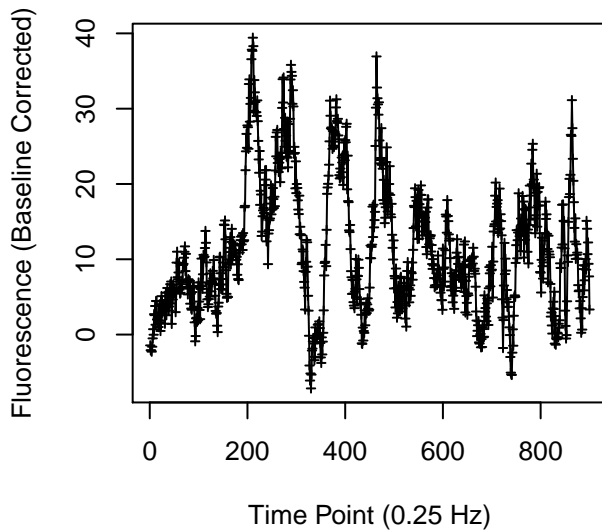

**Cell 259**

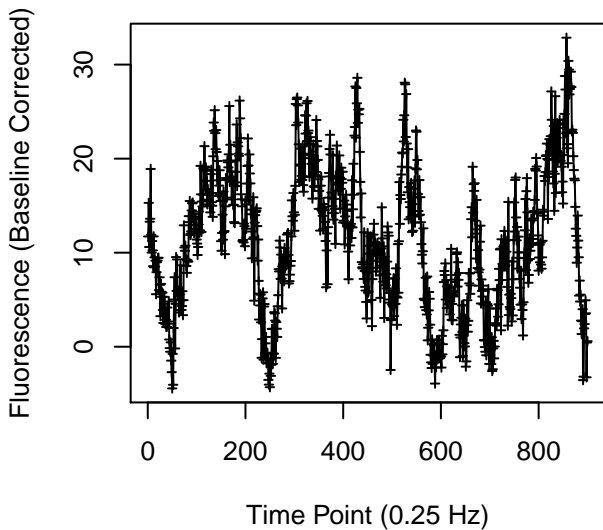

**Cell 260**

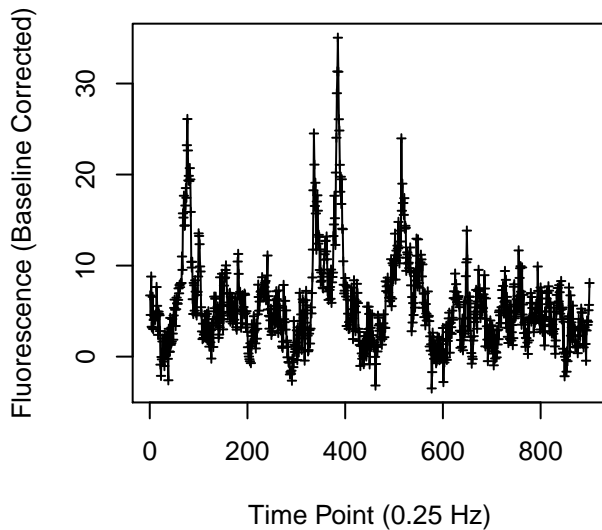

**Cell 261**

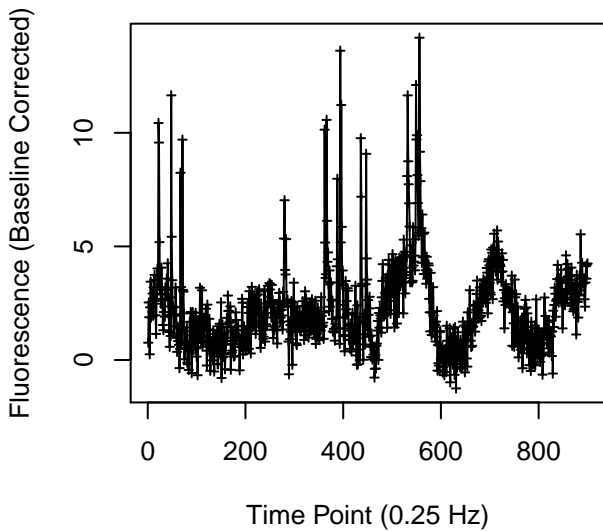

**Cell 262**

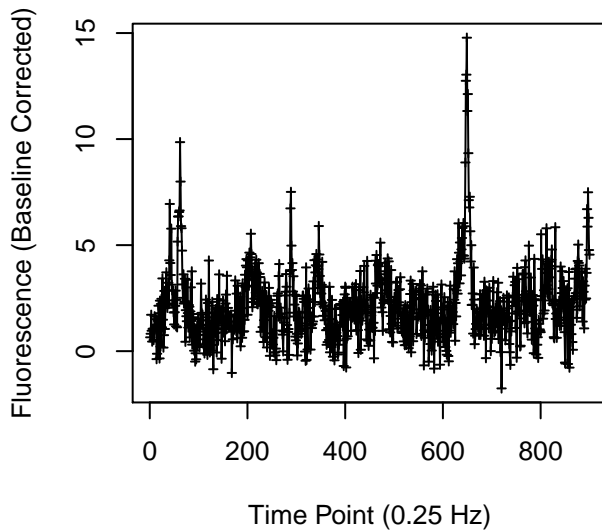

**Cell 263**

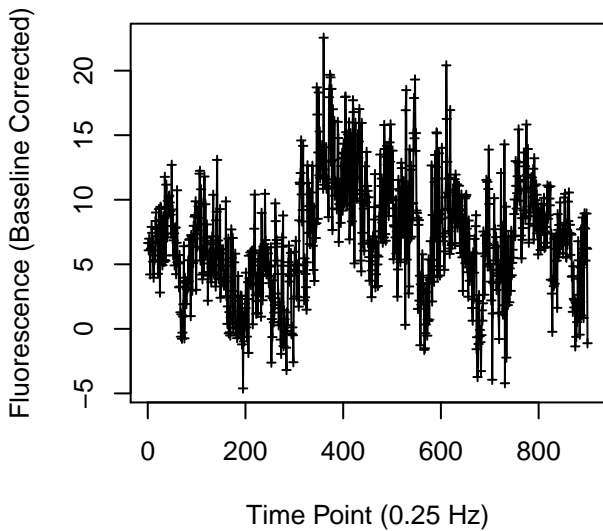

**Cell 264**

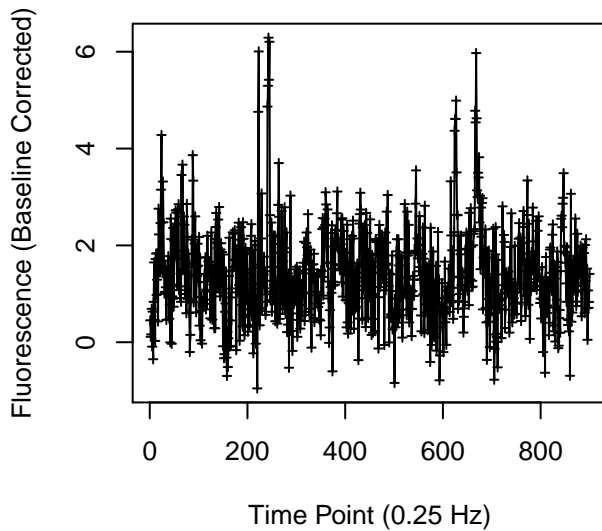

**Cell 265**

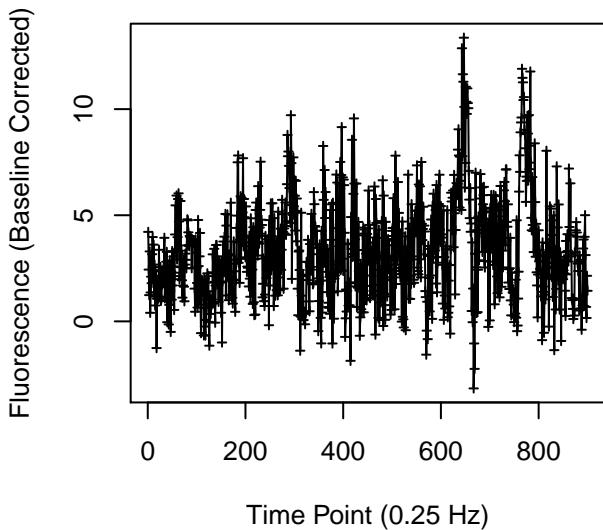

**Cell 266**

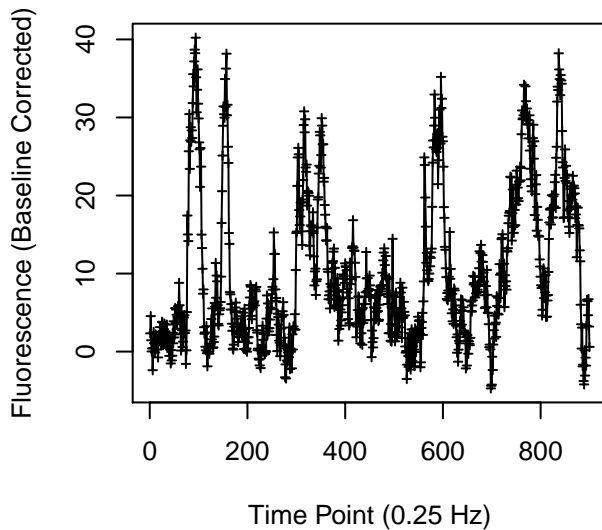

**Cell 267**

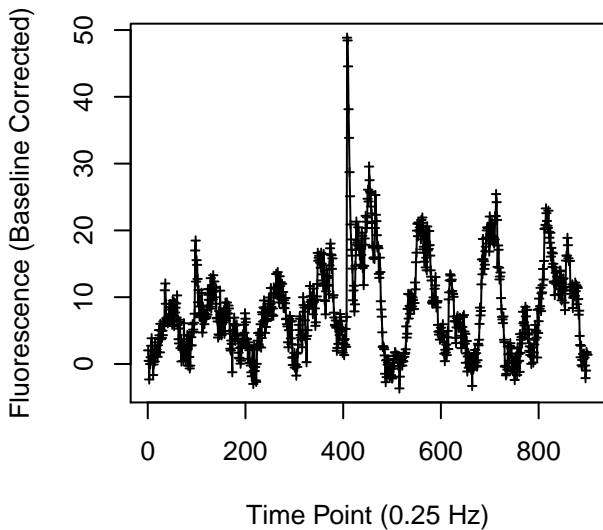

**Cell 268**

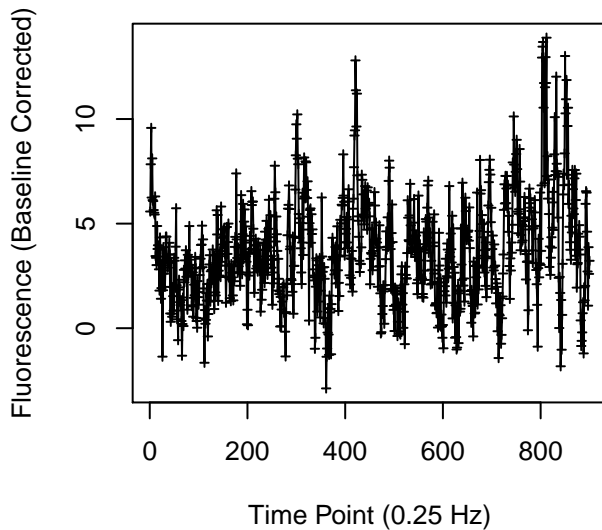

**Cell 269**

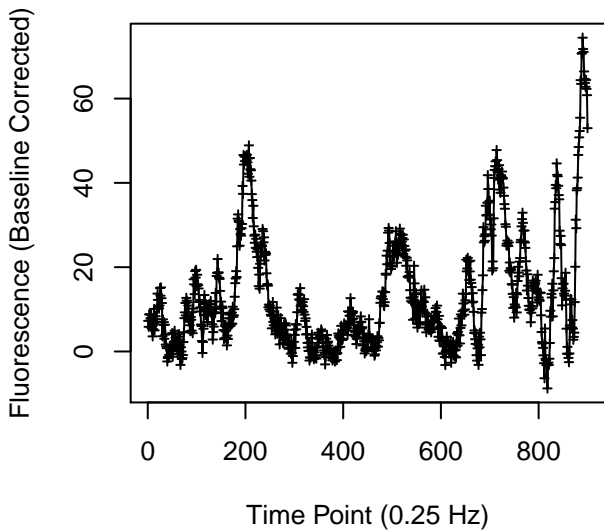

**Cell 270**

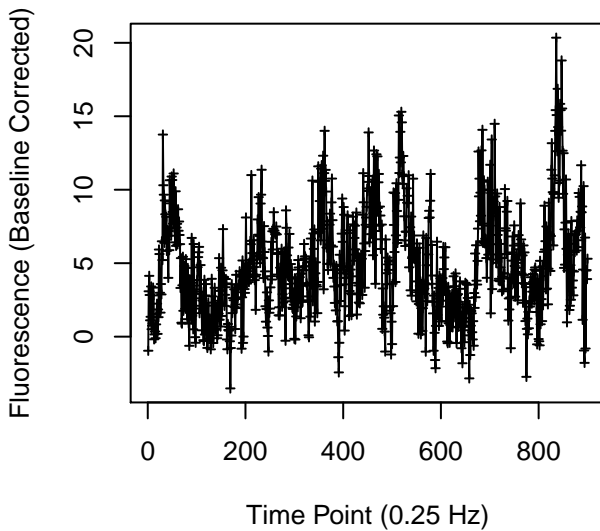

**Cell 271**

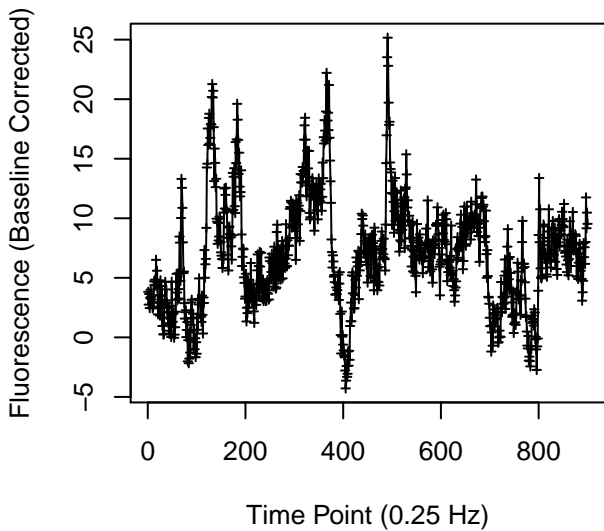

**Cell 272**

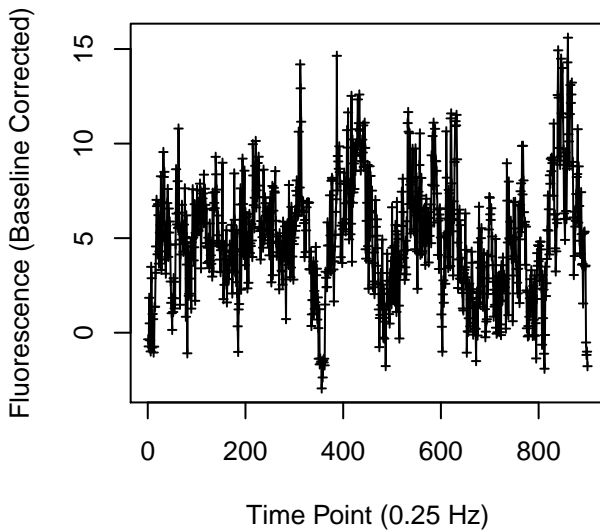

**Cell 273**

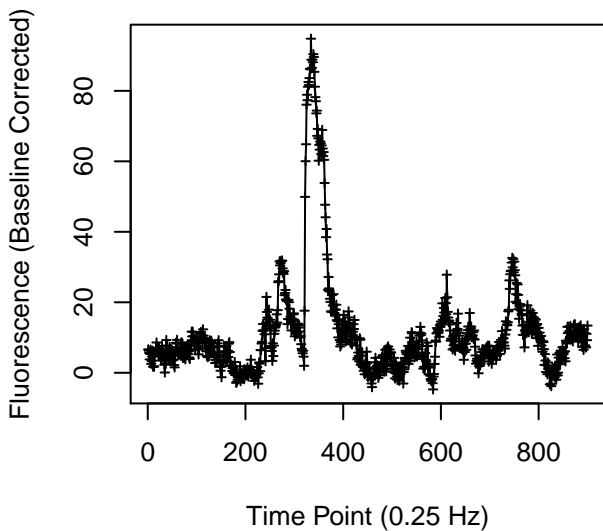

**Cell 274**

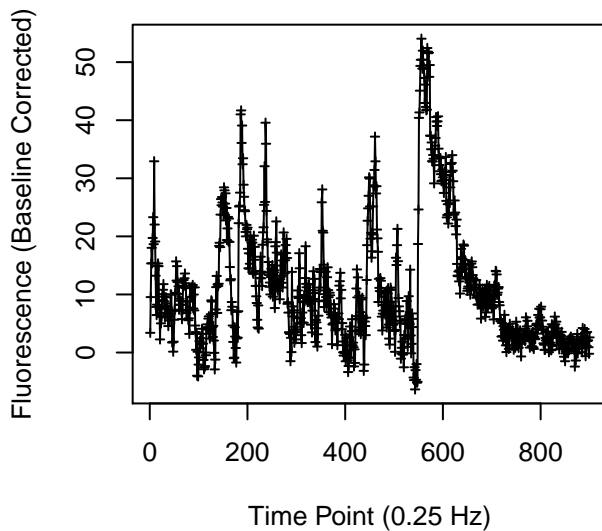

**Cell 275**

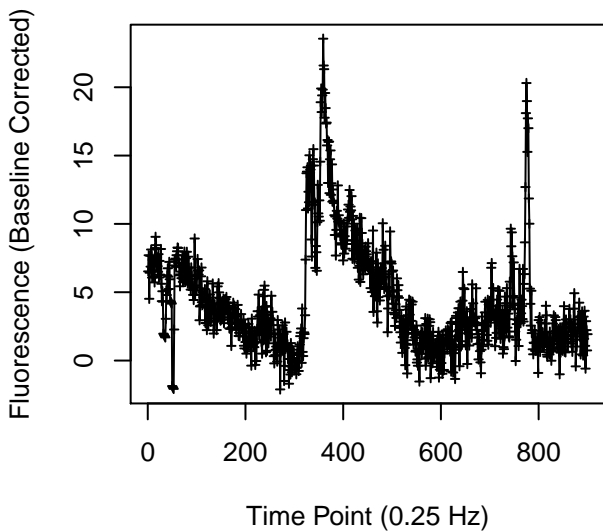

**Cell 276**

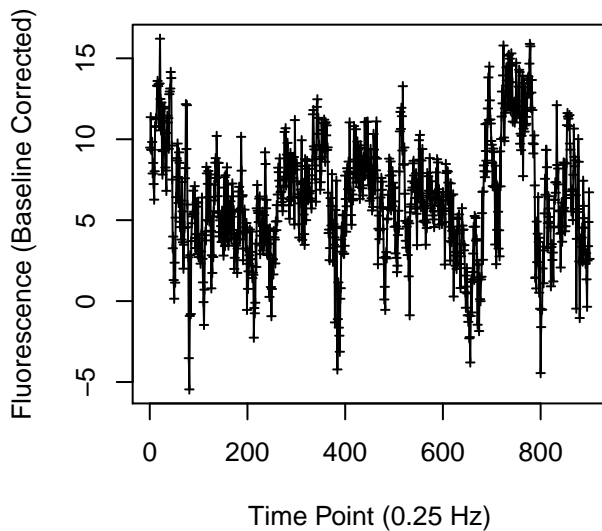

**Cell 277**

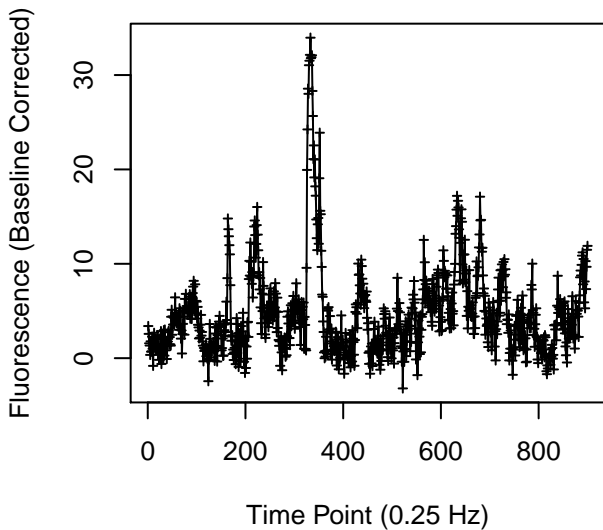

**Cell 278**

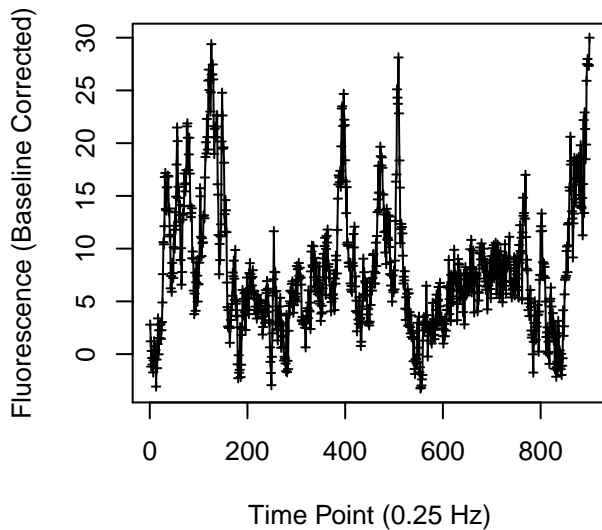

**Cell 279**

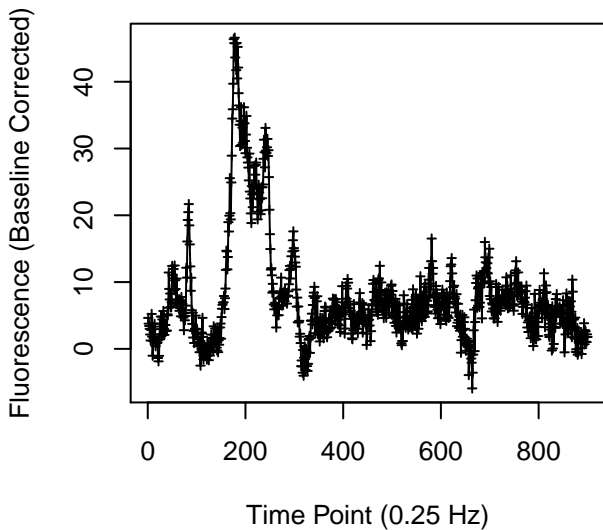

**Cell 280**

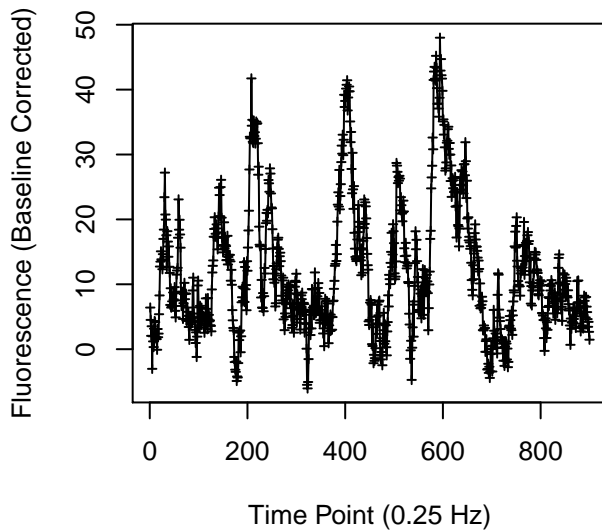

**Cell 281**

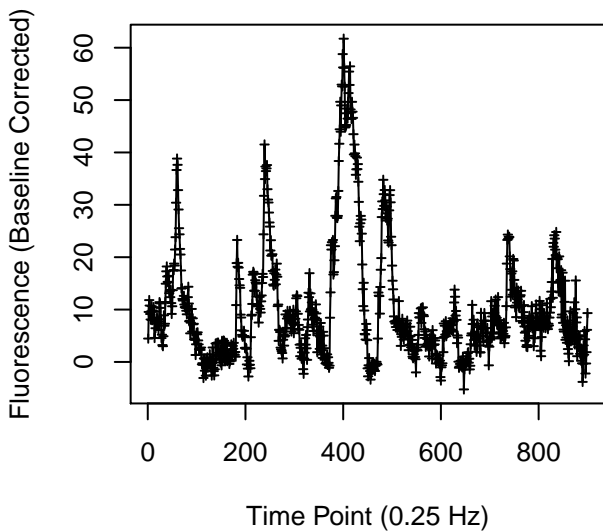

**Cell 282**

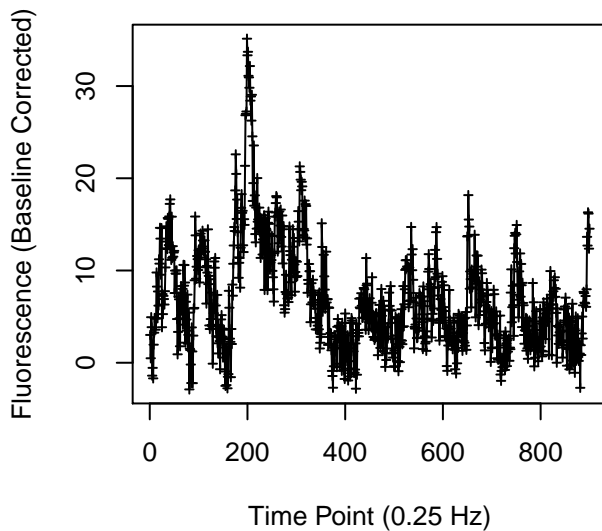

**Cell 283**

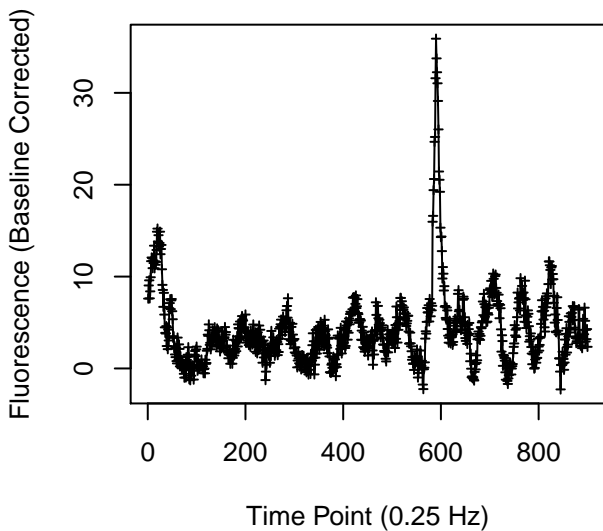

**Cell 284**

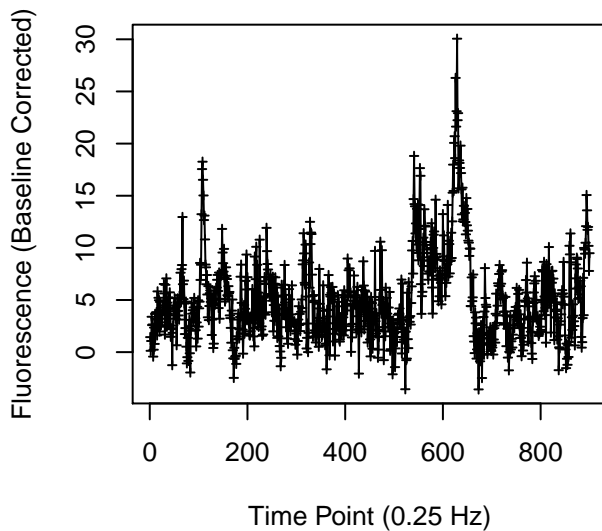

**Cell 285**

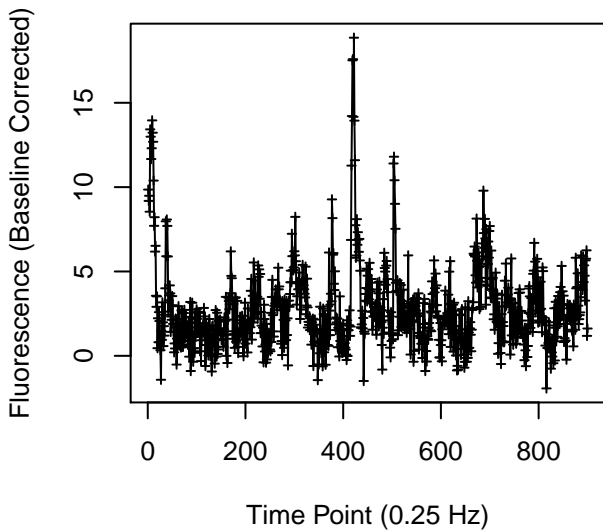

**Cell 286**

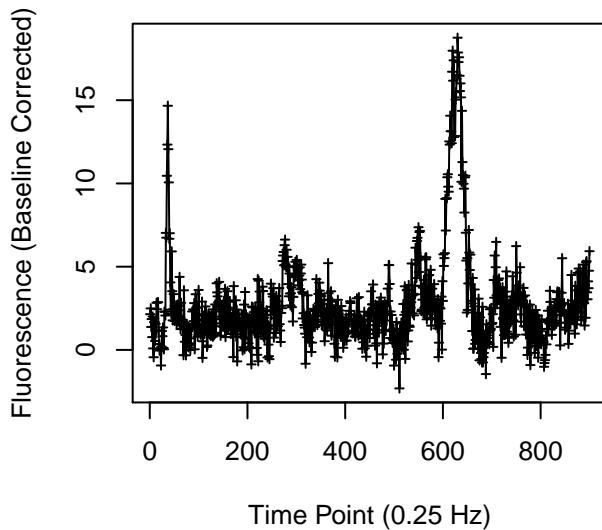

**Cell 287**

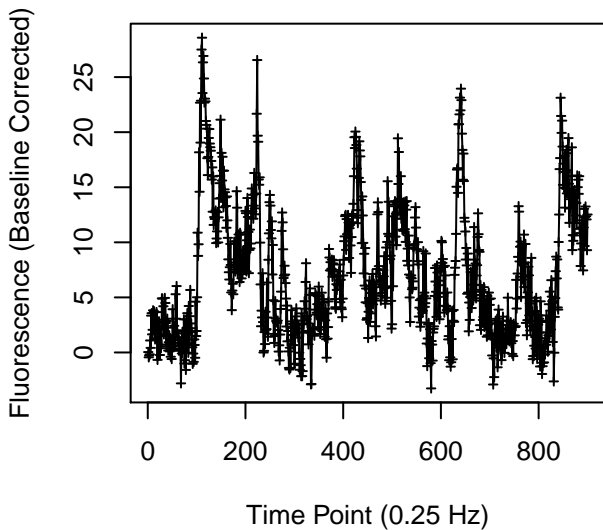

**Cell 288**

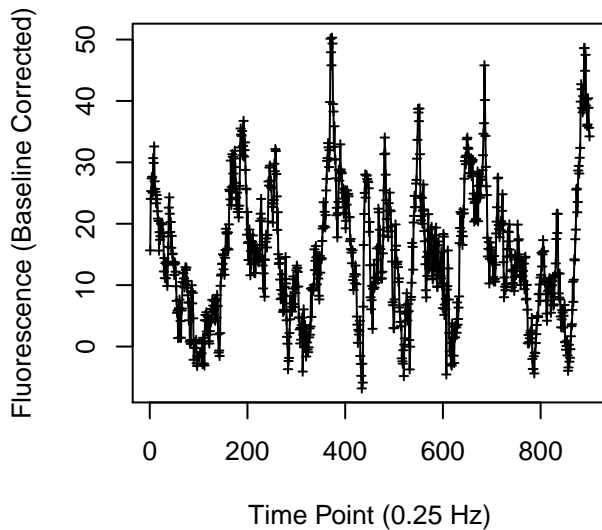

**Cell 289**

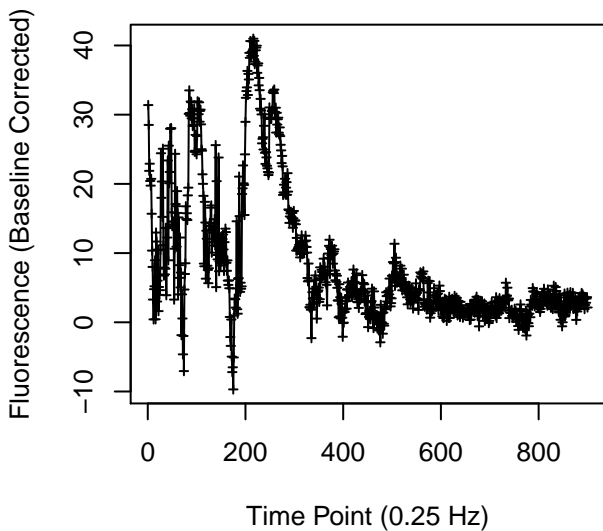

**Cell 290**

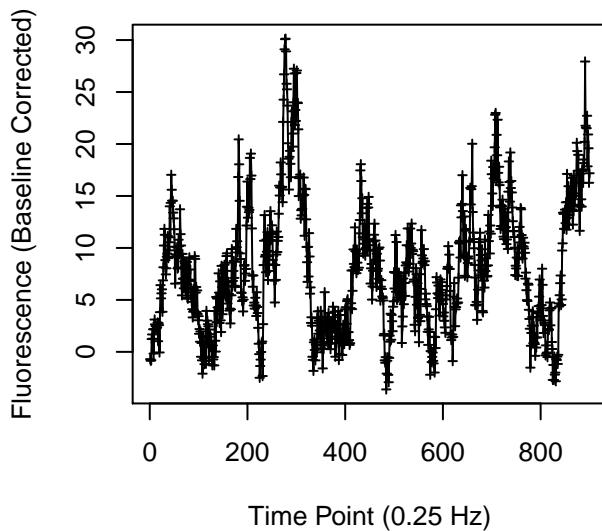

**Cell 291**

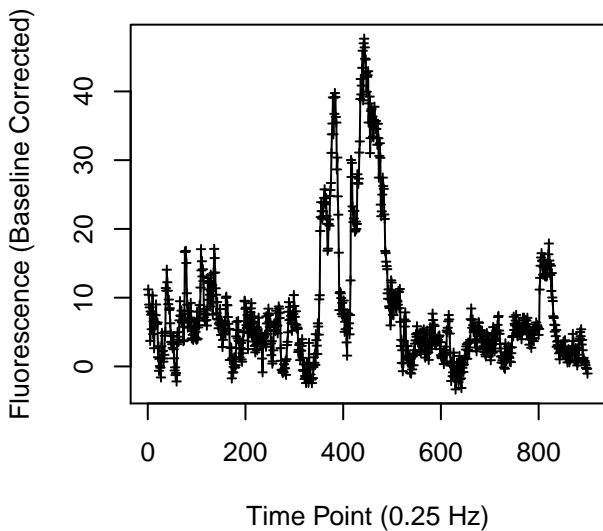

**Cell 292**

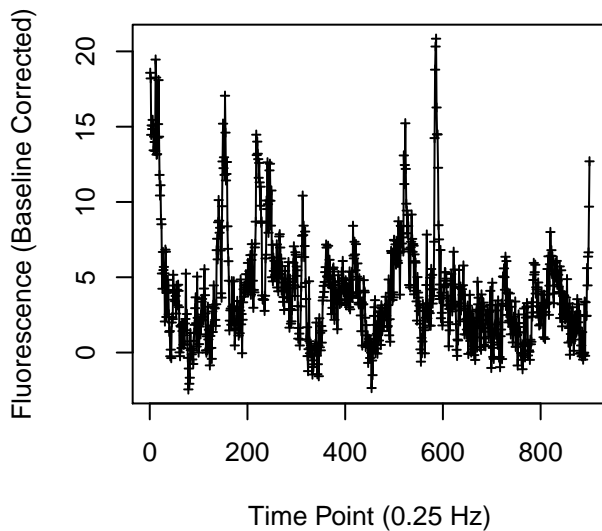

**Cell 293**

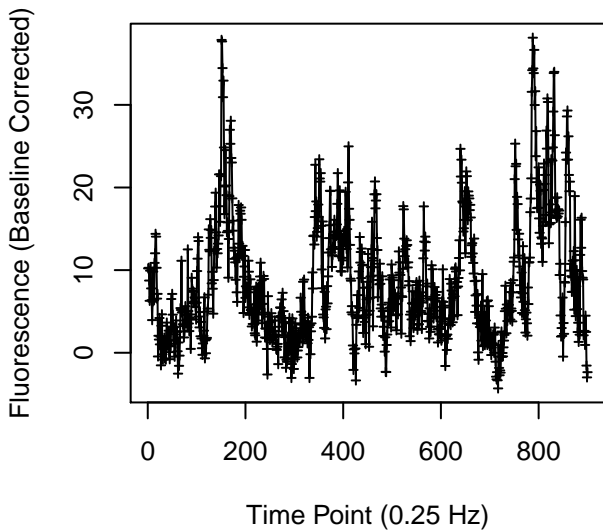

**Cell 294**

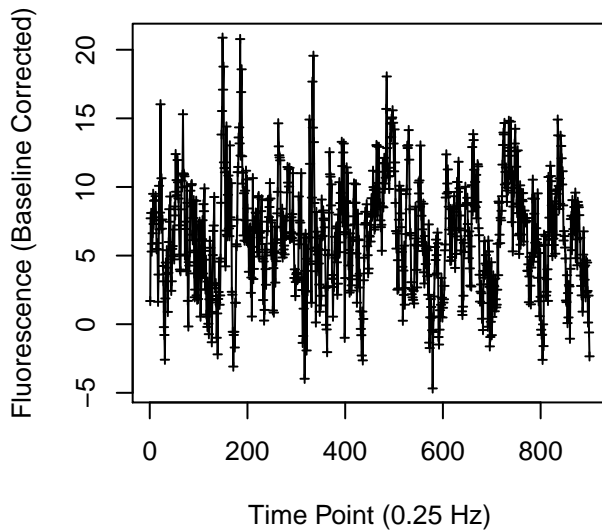

**Cell 295**

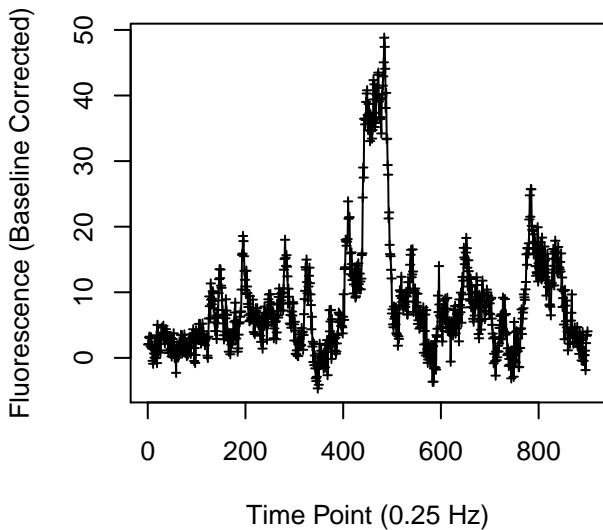

**Cell 296**

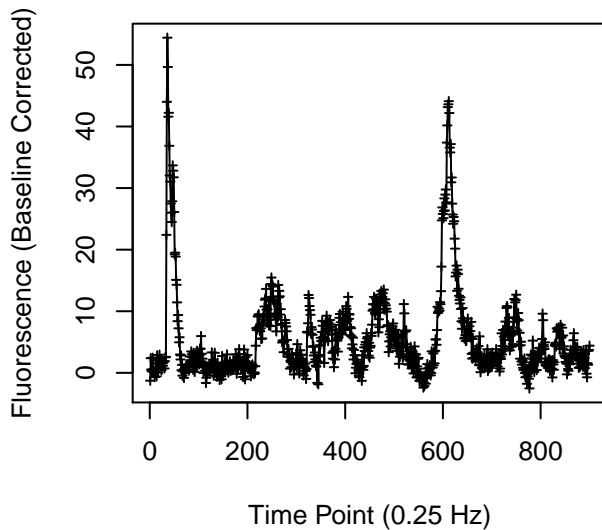

**Cell 297**

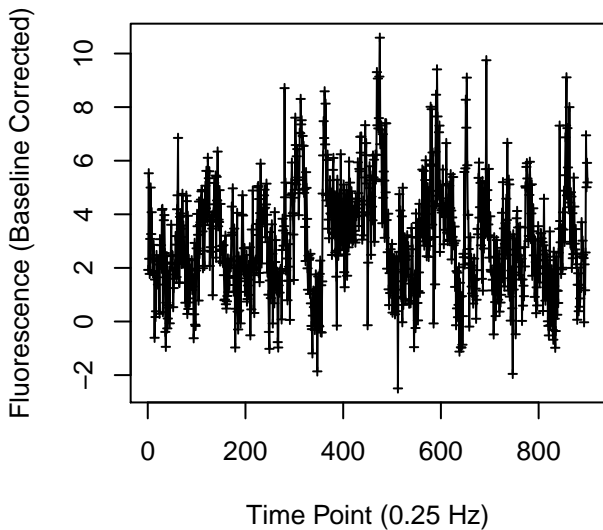

**Cell 298**

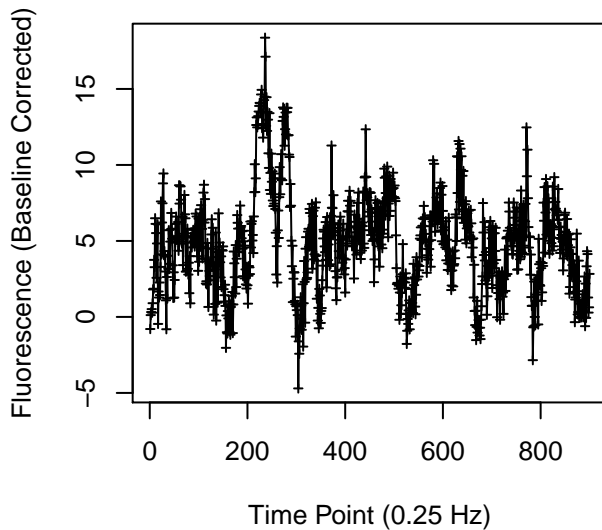

**Cell 299**

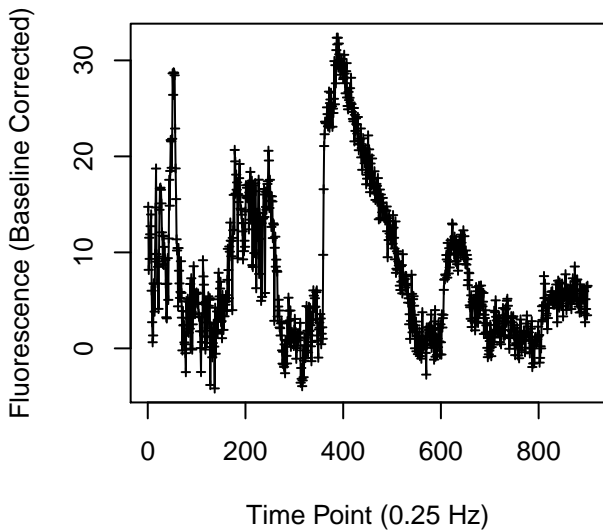

**Cell 300**

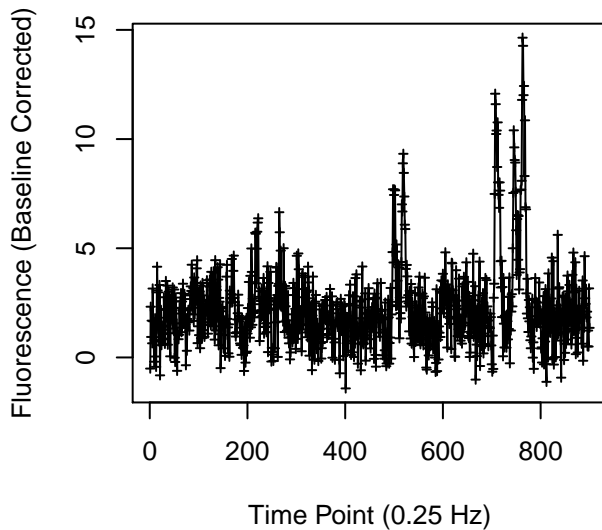

**Cell 301**

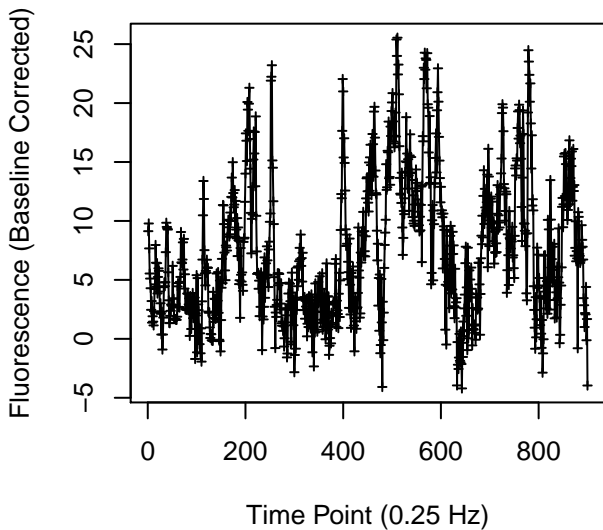

**Cell 302**

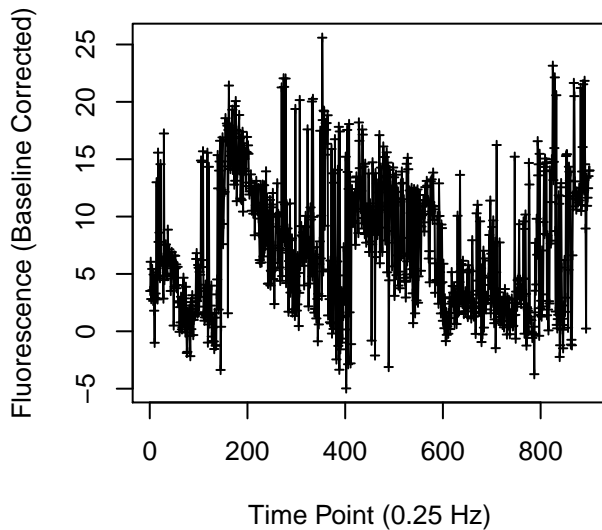

**Cell 303**

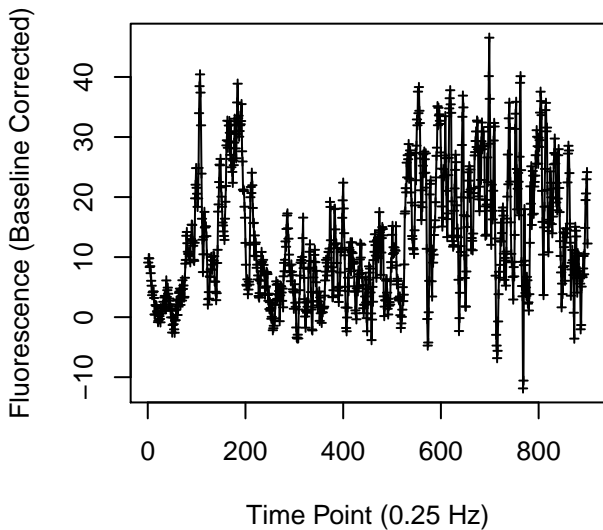

**Cell 304**

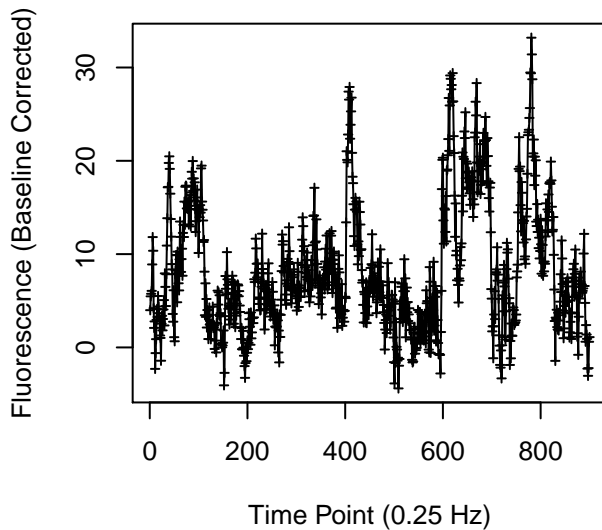

**Cell 305**

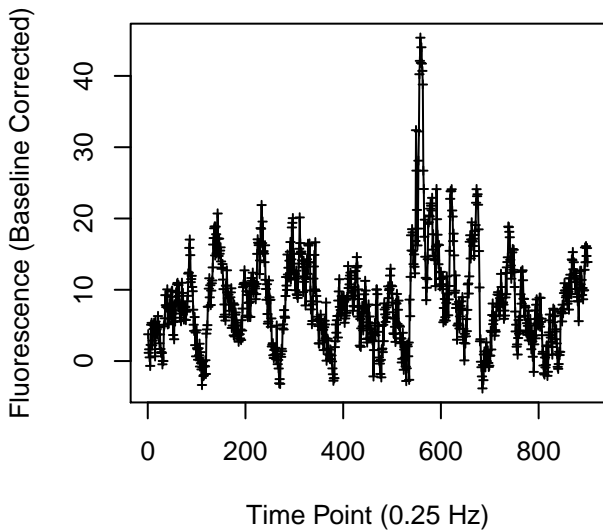

**Cell 306**

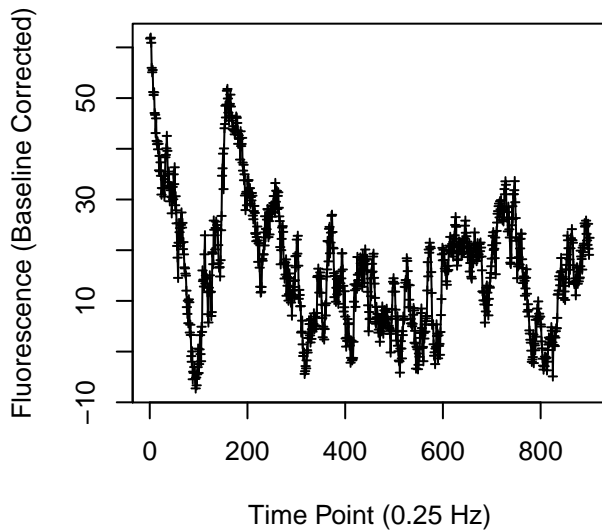

**Cell 307**

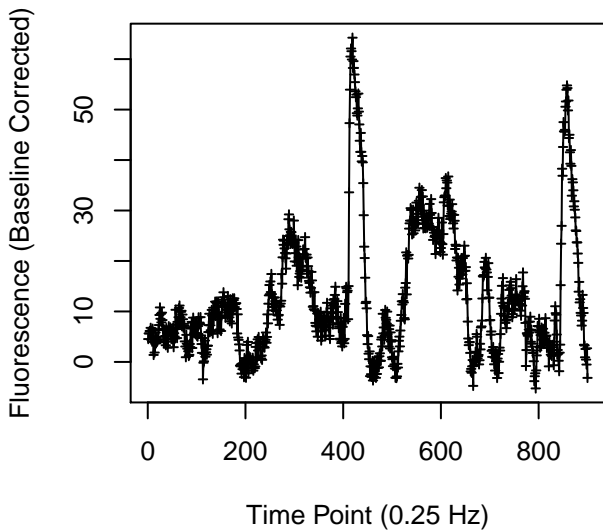

**Cell 308**

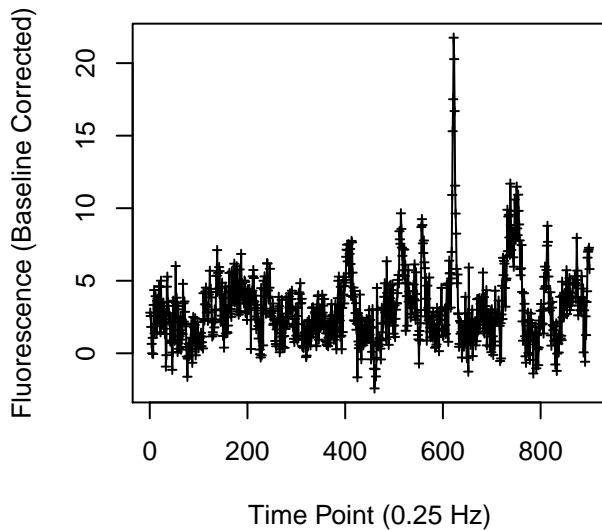

**Cell 309**

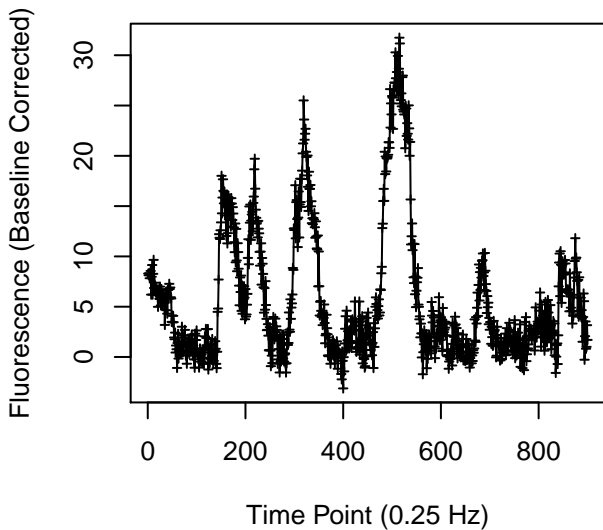

**Cell 310**

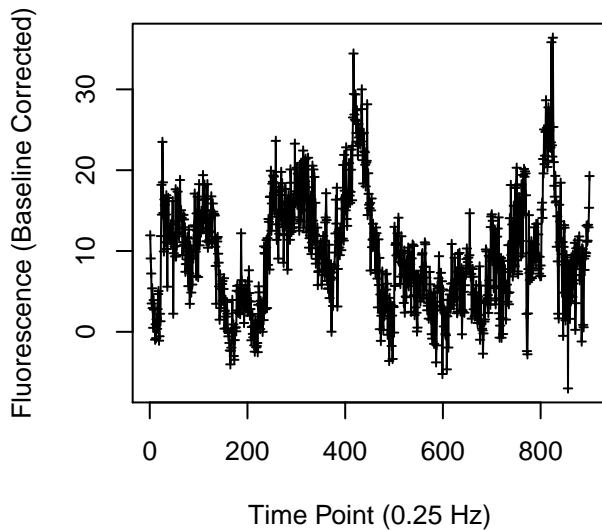

**Cell 311**

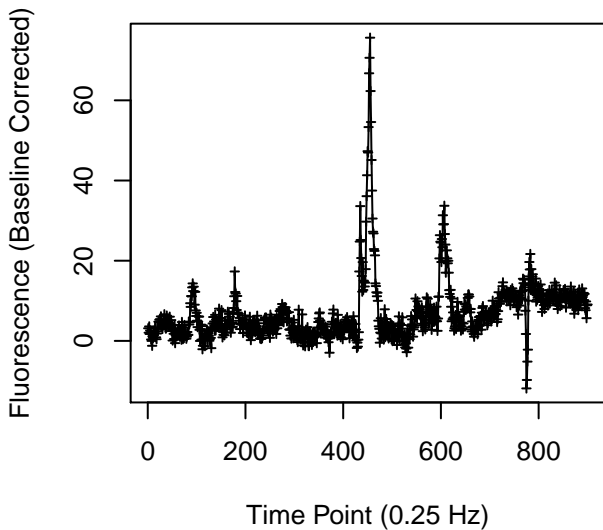

**Cell 312**

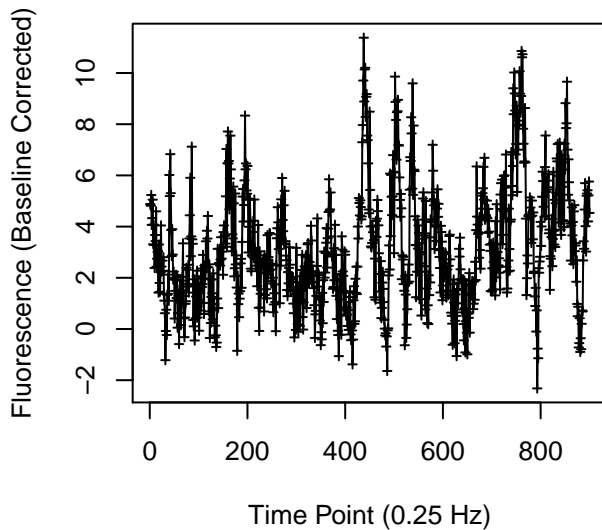

**Cell 313**

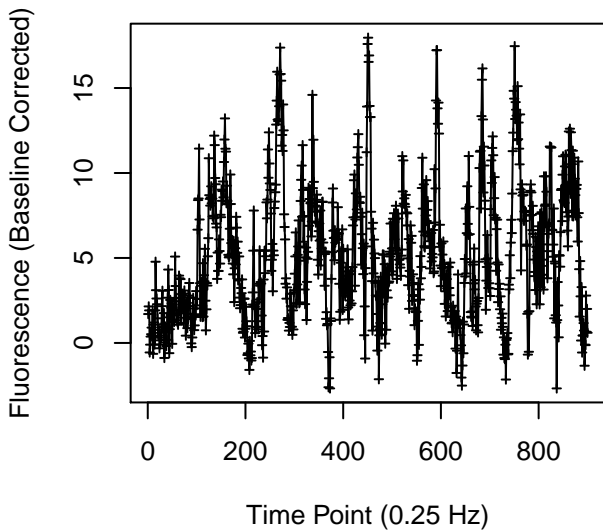

**Cell 314**

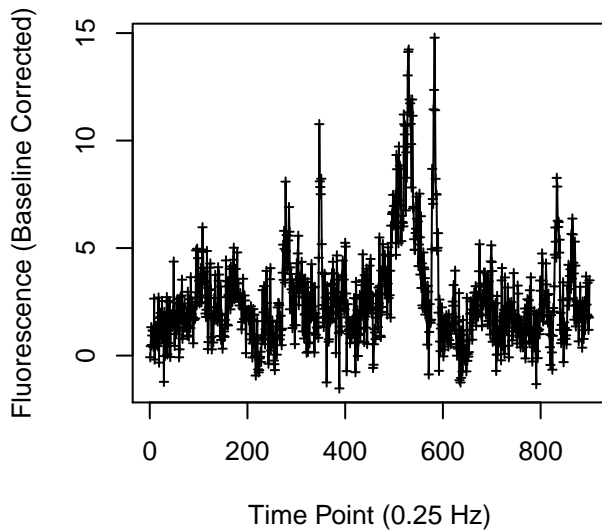

**Cell 315**

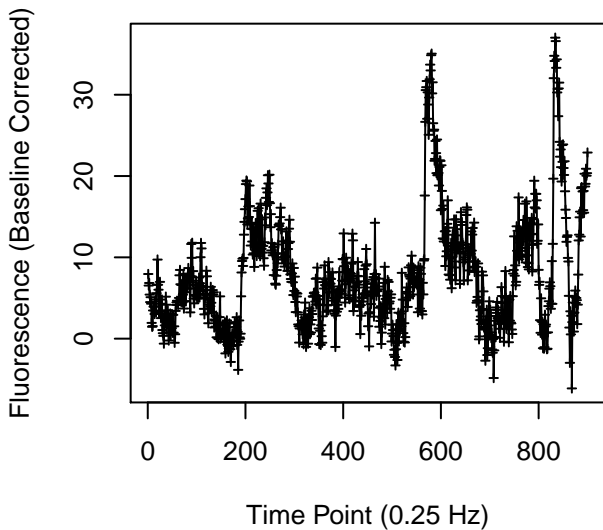

**Cell 316**

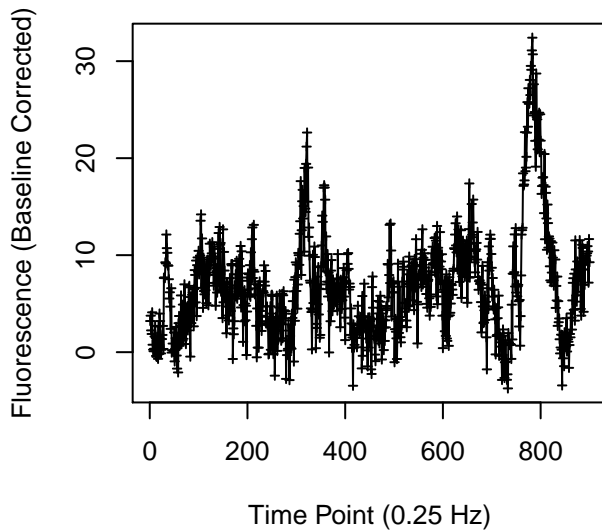

**Cell 317**

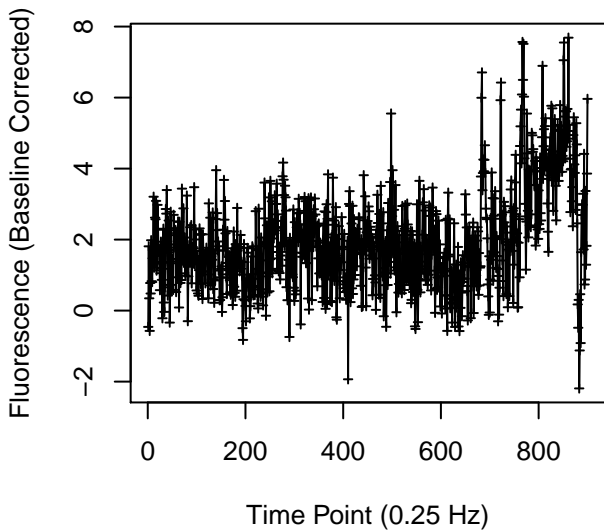

**Cell 318**

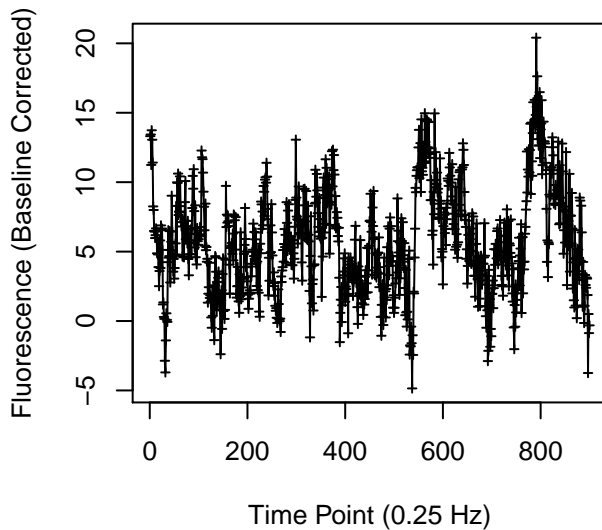

**Cell 319**

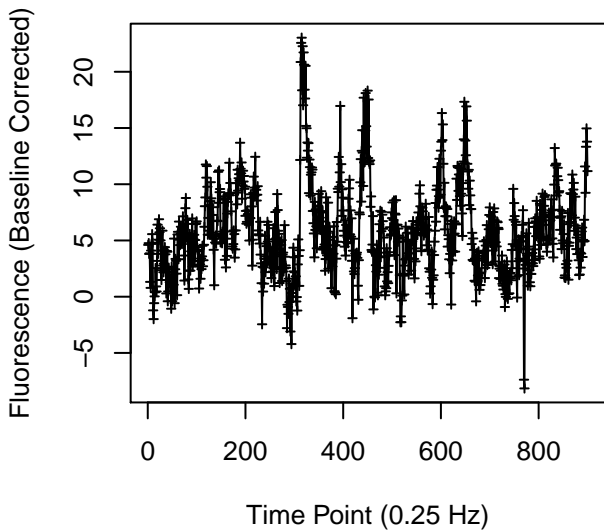

**Cell 320**

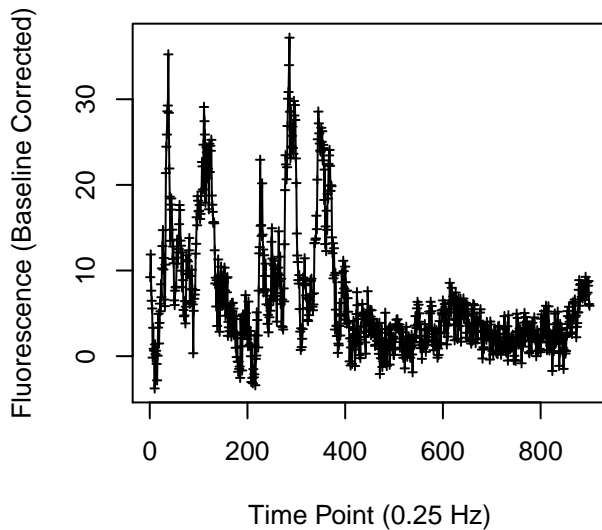

**Cell 321**

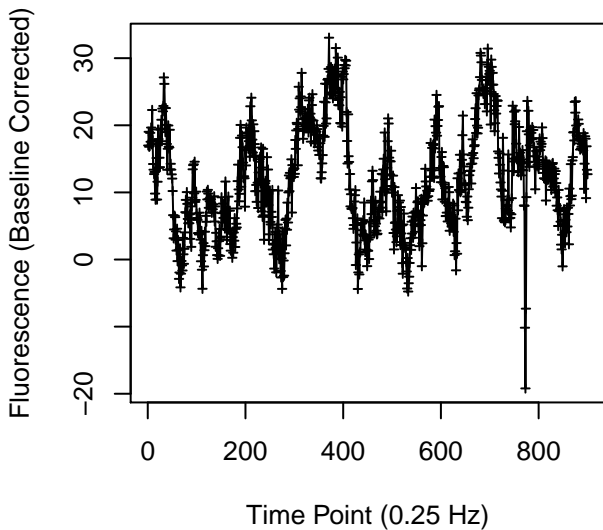

**Cell 322**

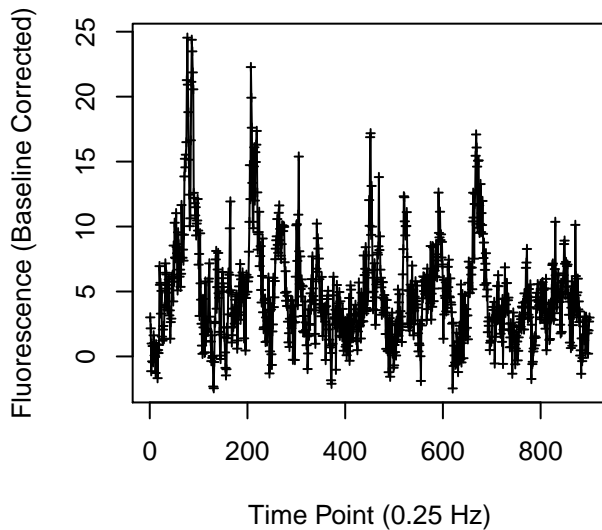

**Cell 323**

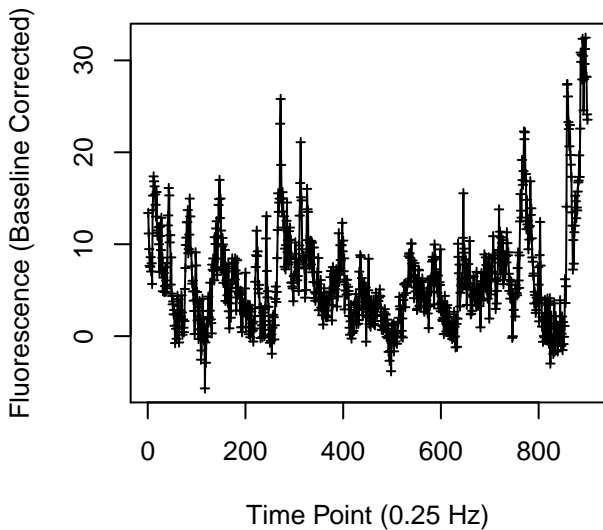

**Cell 324**

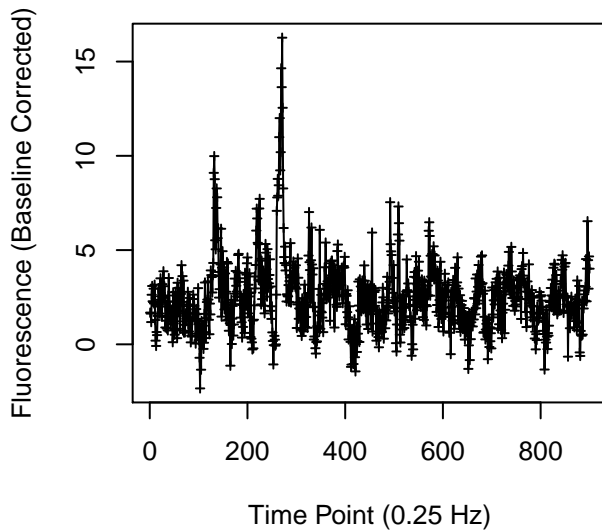

**Cell 325**

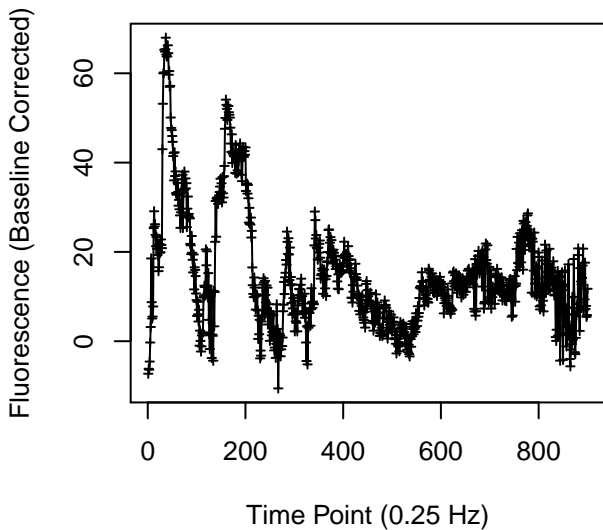

**Cell 326**

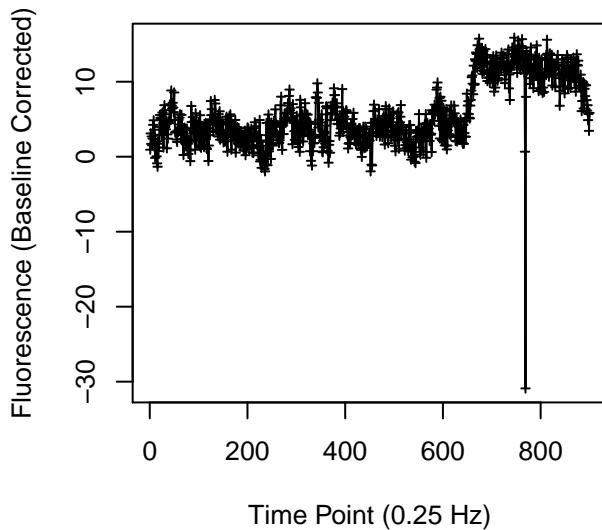

**Cell 327**

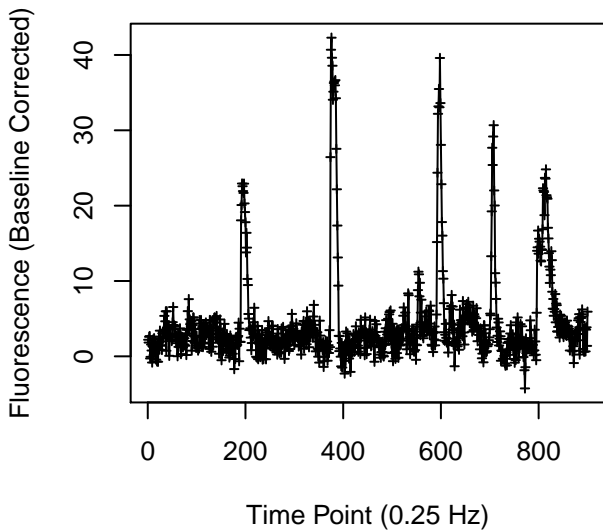

**Cell 328**

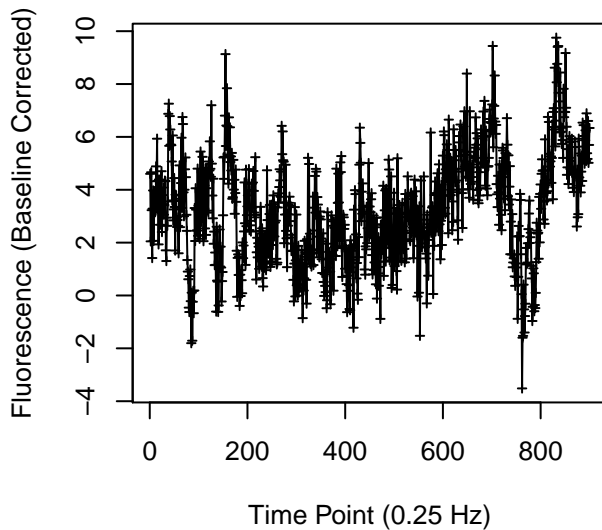

**Cell 329**

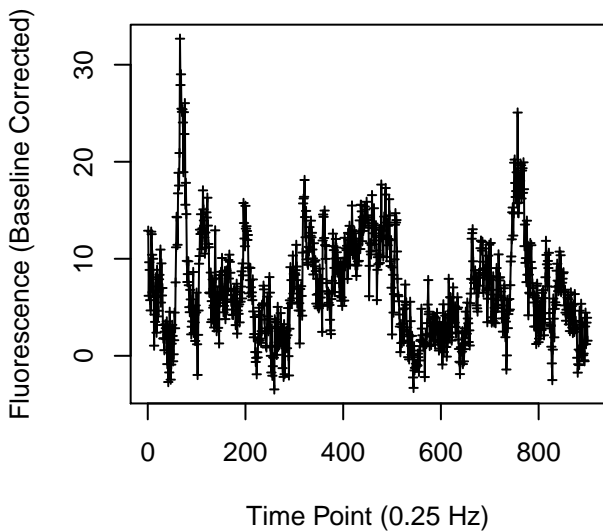

**Cell 330**

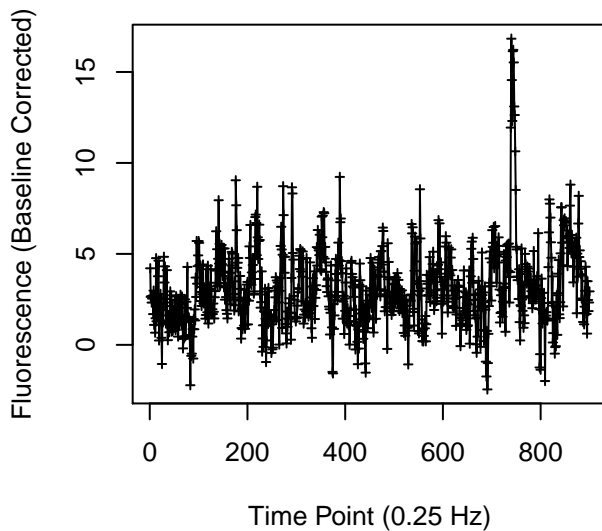

**Cell 331**

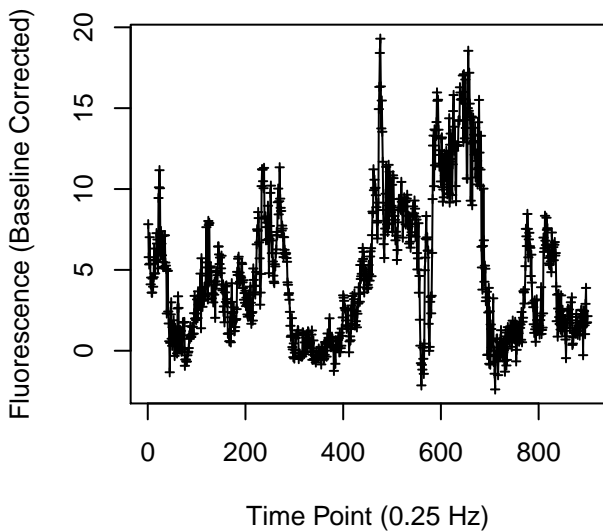

**Cell 332**

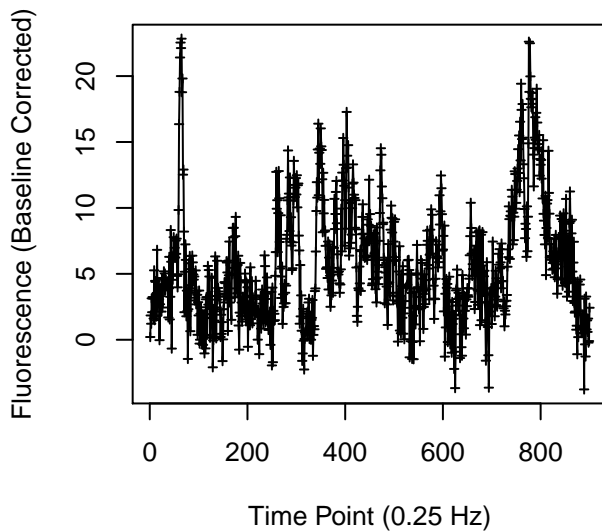

**Cell 333**

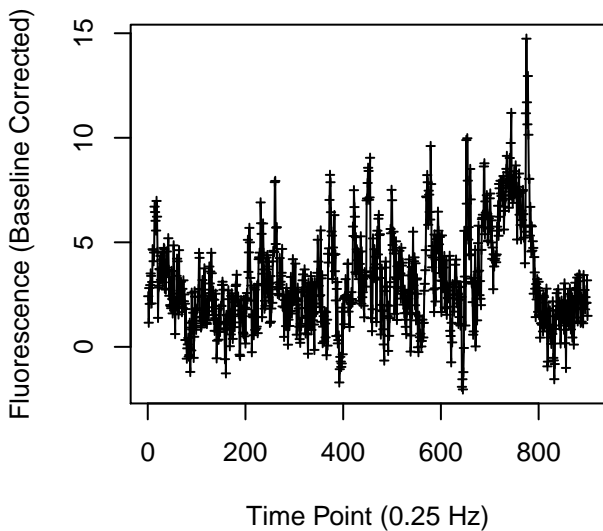

**Cell 334**

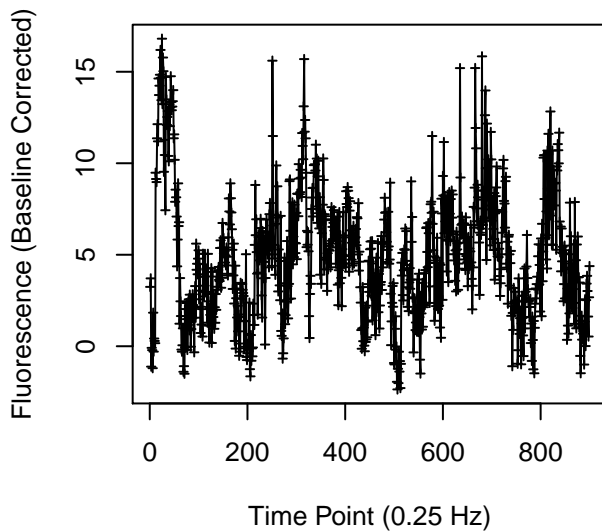

**Cell 335**

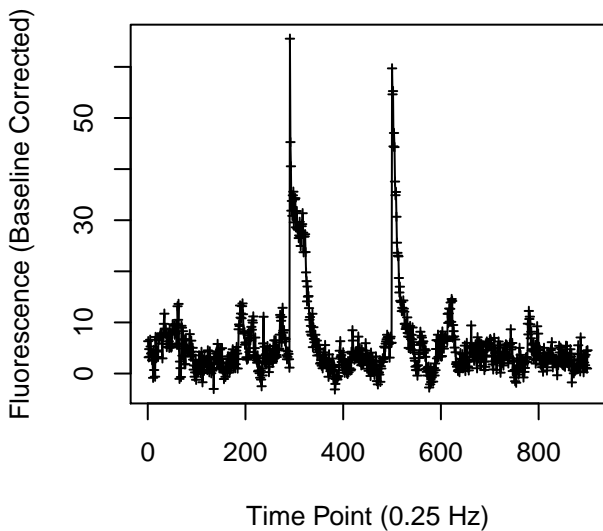

**Cell 336**

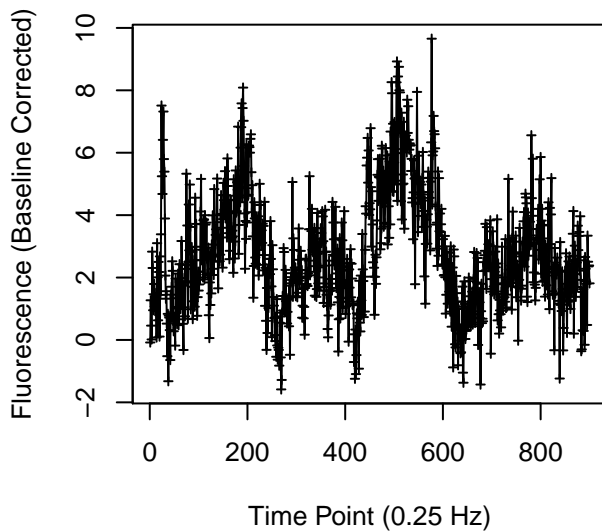

**Cell 337**

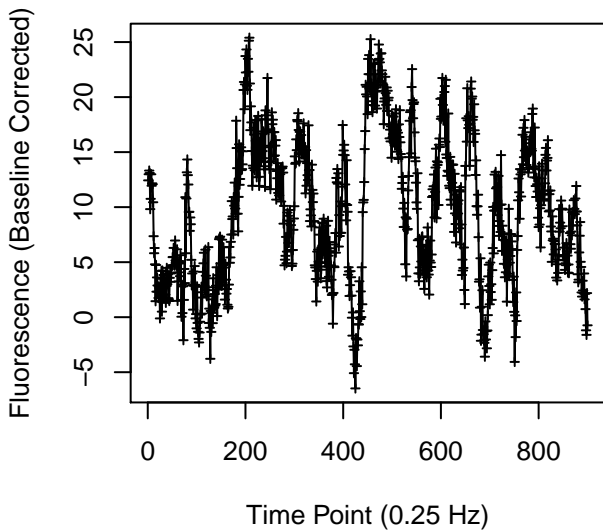

**Cell 338**

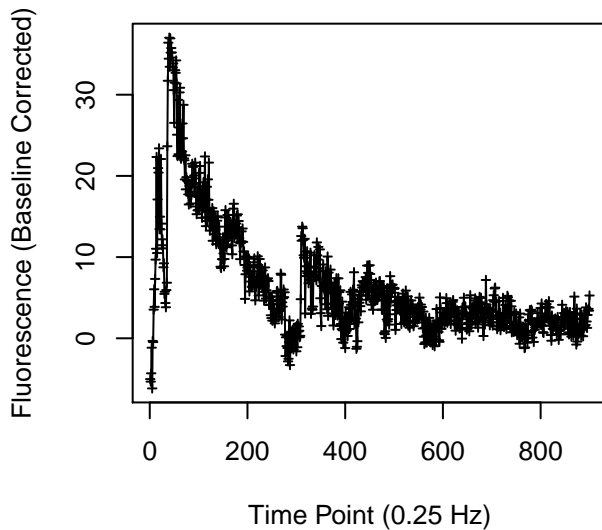

**Cell 339**

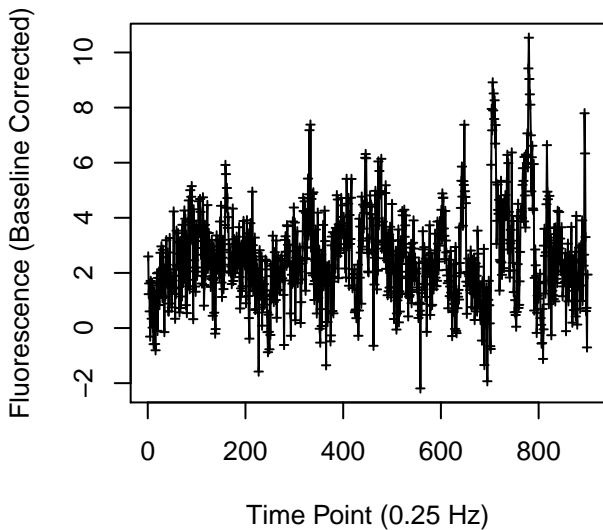

**Cell 340**

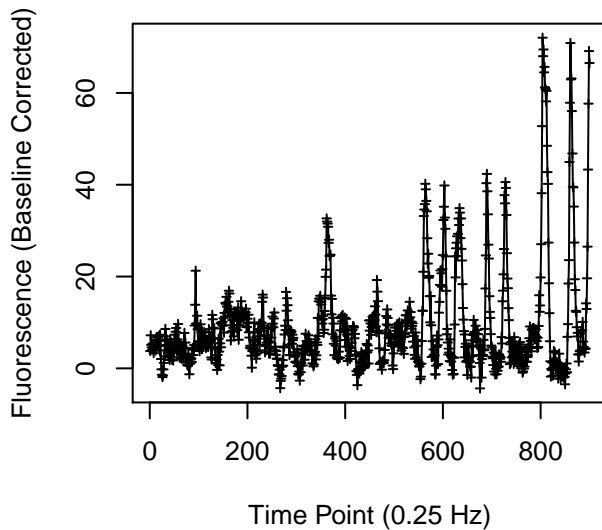

**Cell 341**

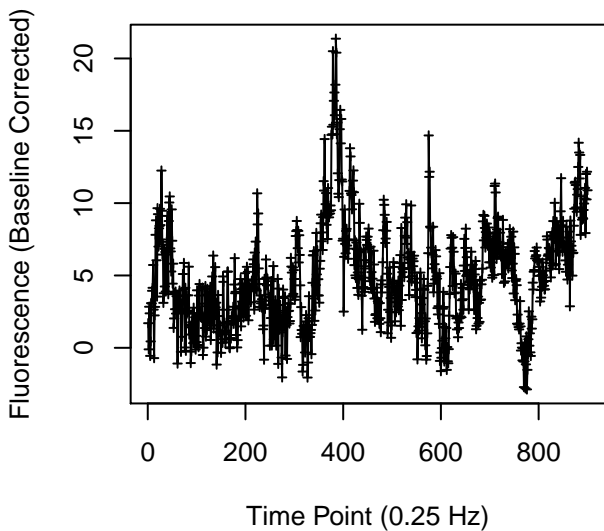

**Cell 342**

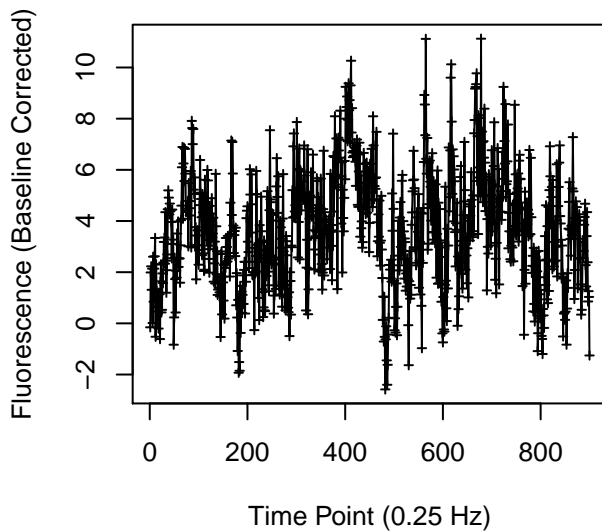

**Cell 343**

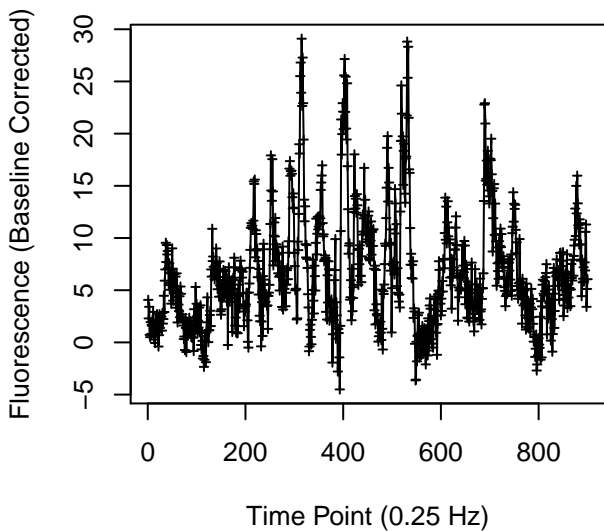

**Cell 344**

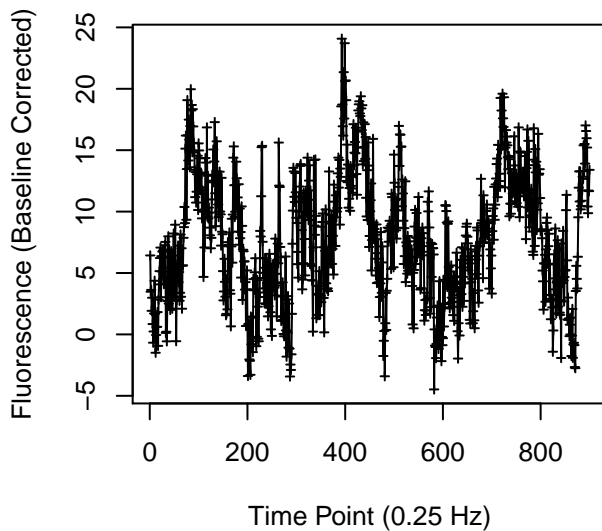

**Cell 345**

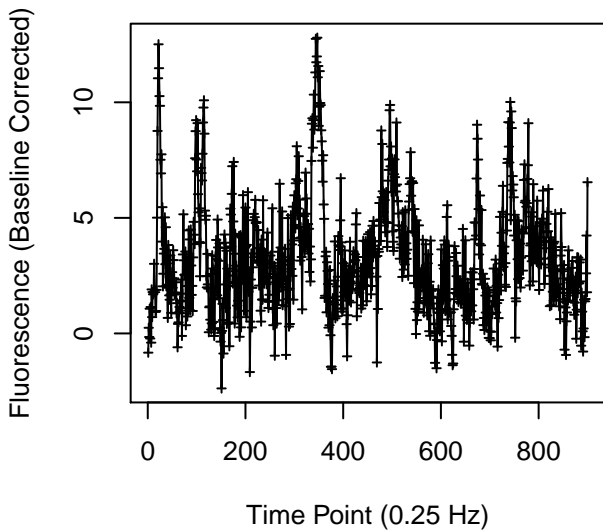

**Cell 346**

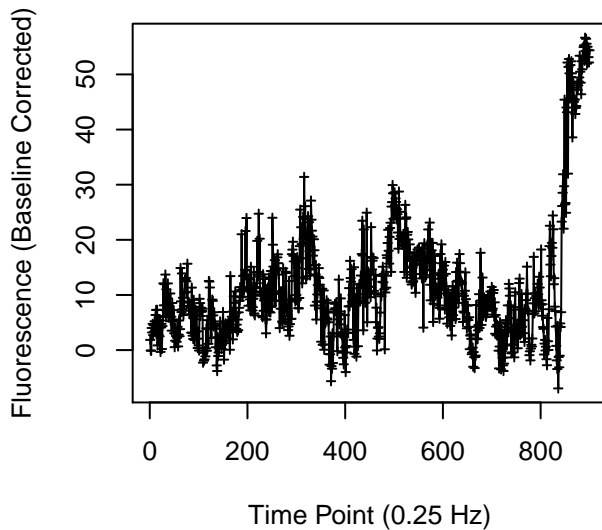

**Cell 347**

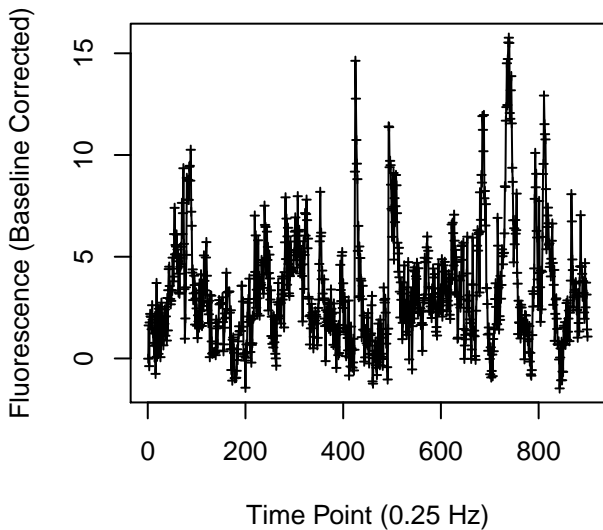

**Cell 348**

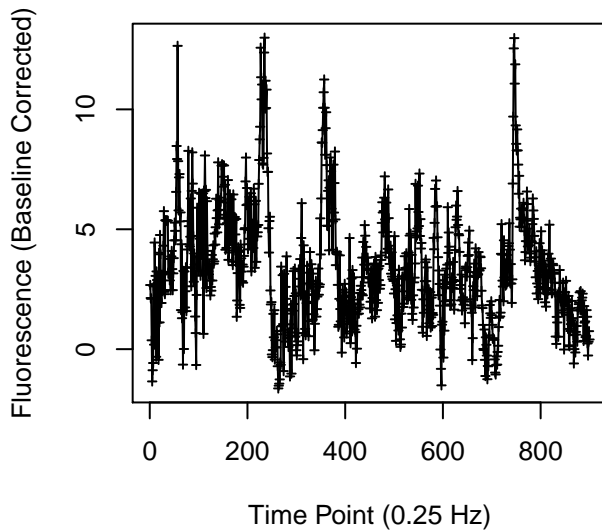

**Cell 349**

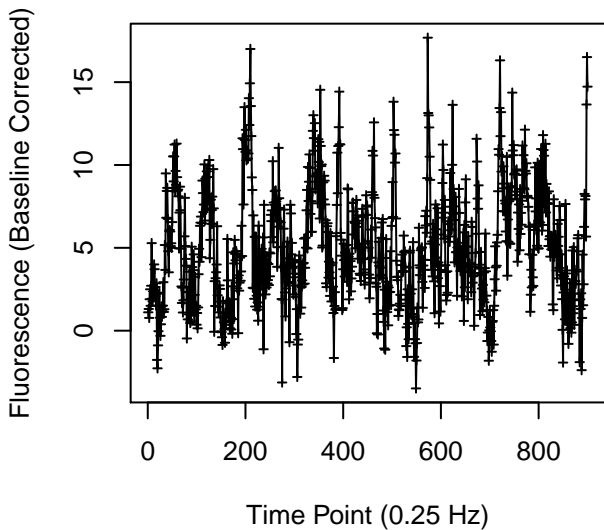

**Cell 350**

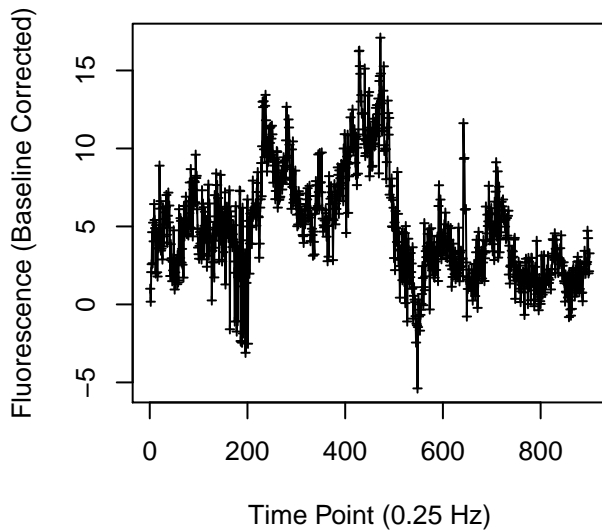

**Cell 351**

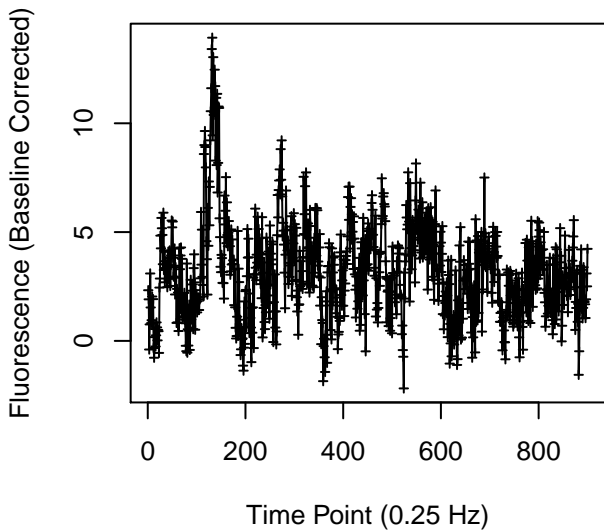

**Cell 352**

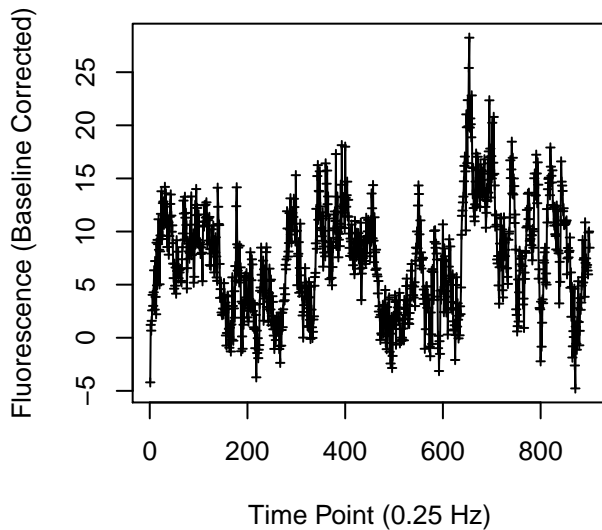

**Cell 353**

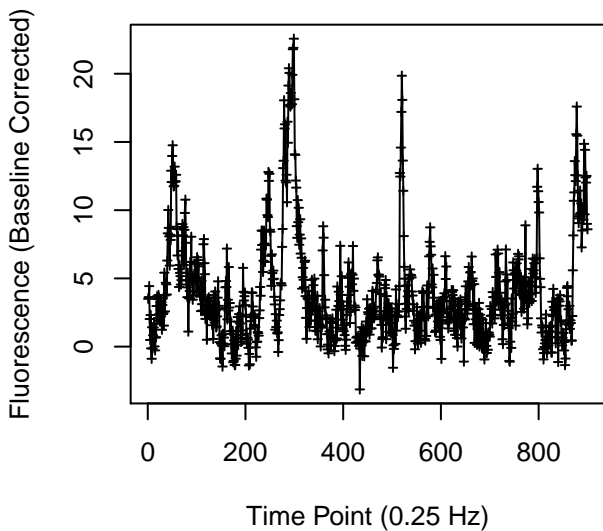

**Cell 354**

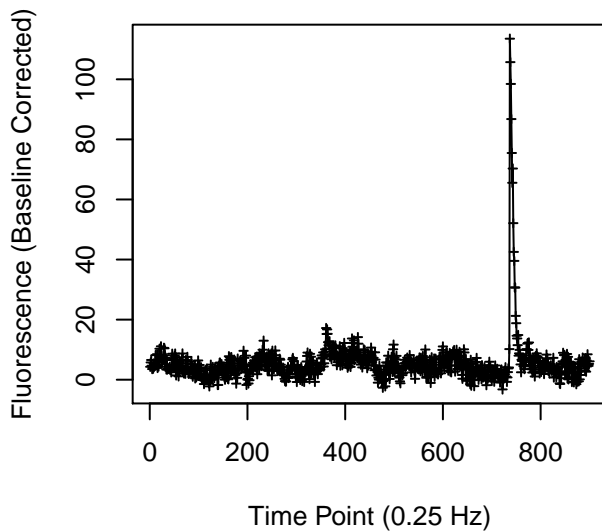

**Cell 355**

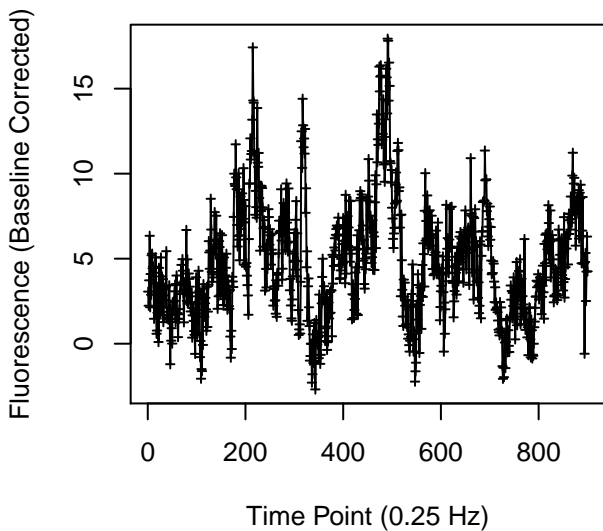

**Cell 356**

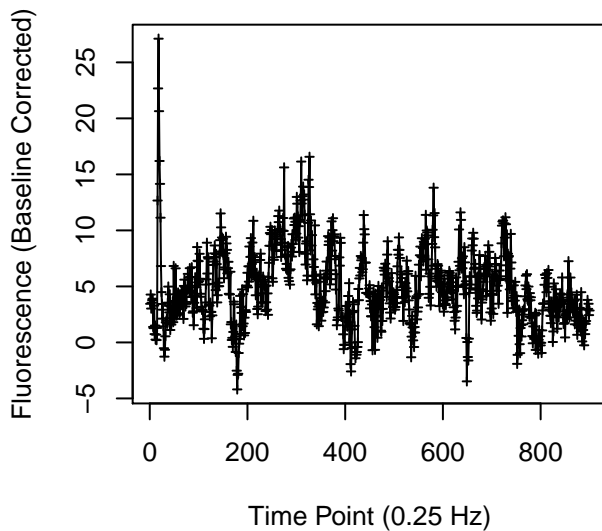

**Cell 357**

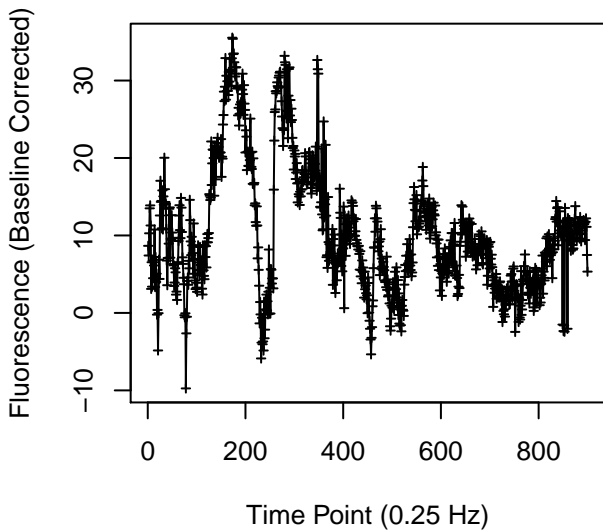

**Cell 358**

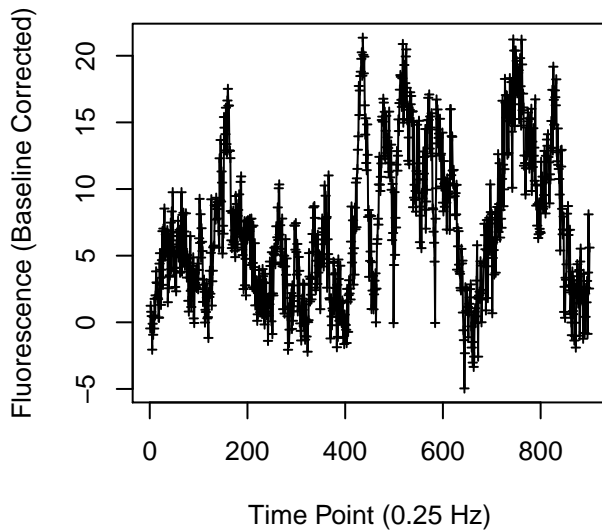

**Cell 359**

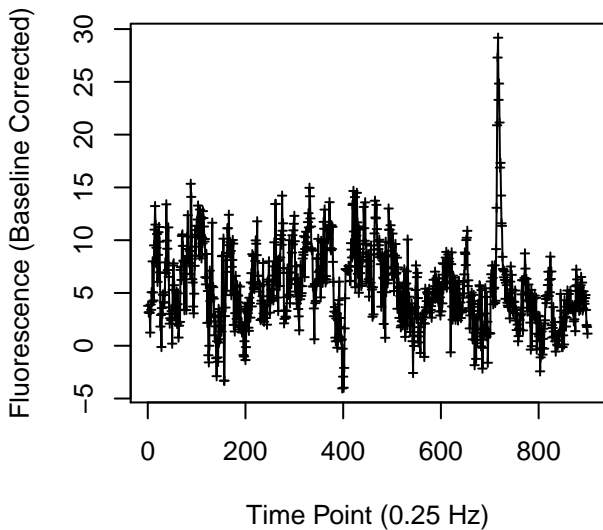

**Cell 360**

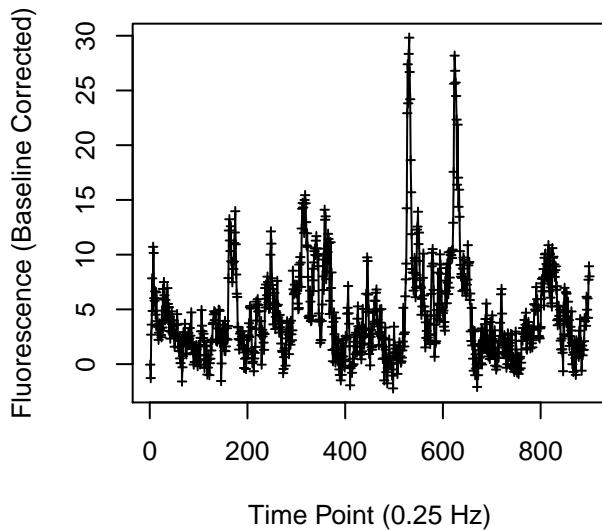

**Cell 361**

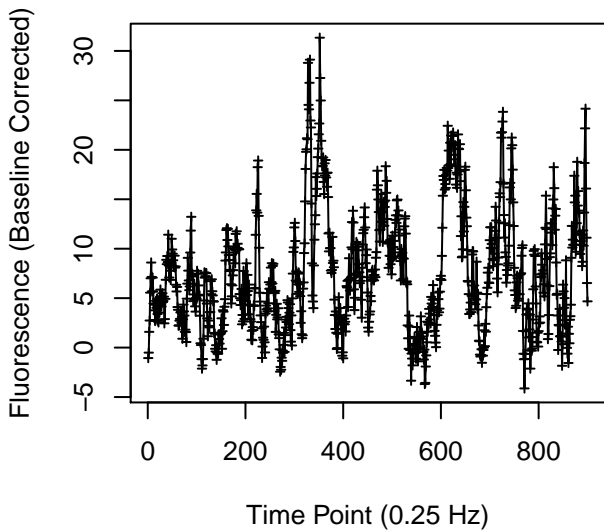

**Cell 362**

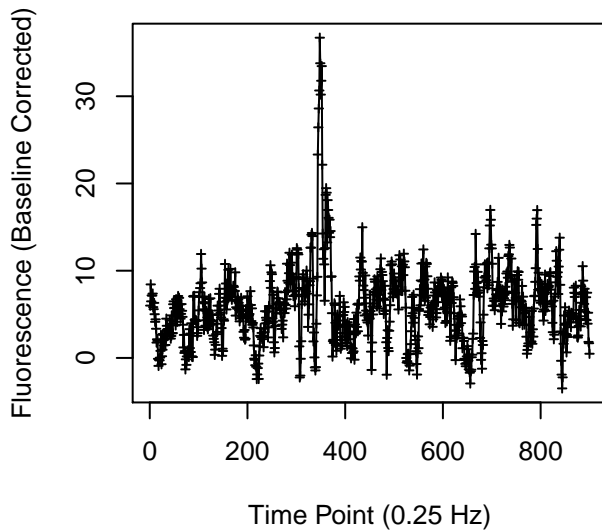

**Cell 363**

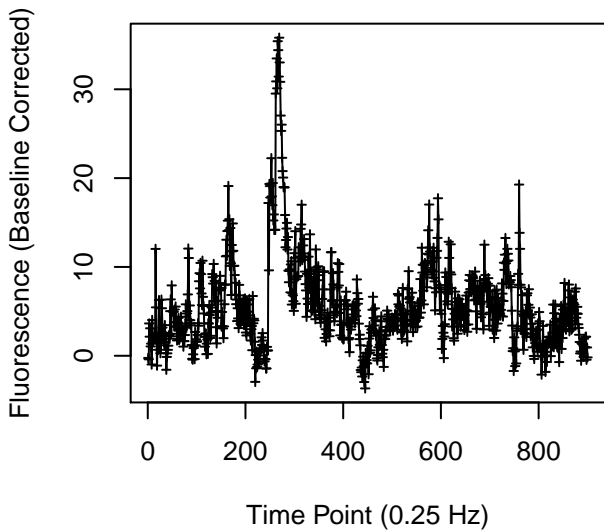

**Cell 364**

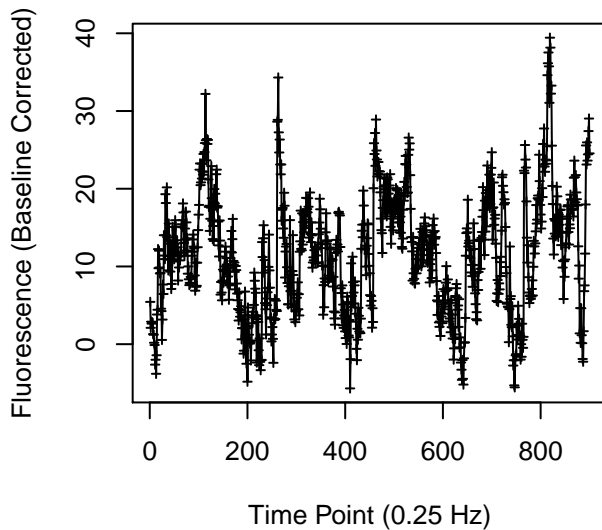

**Cell 365**

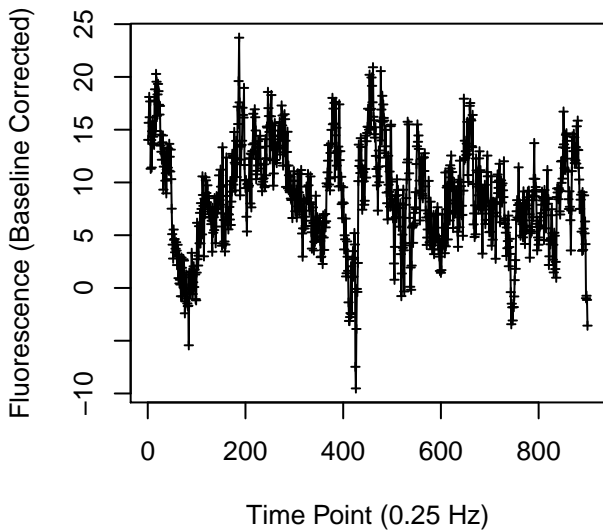

**Cell 366**

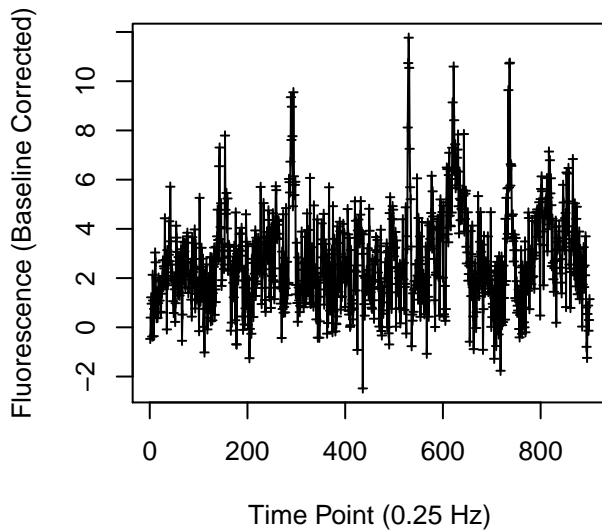

**Cell 367**

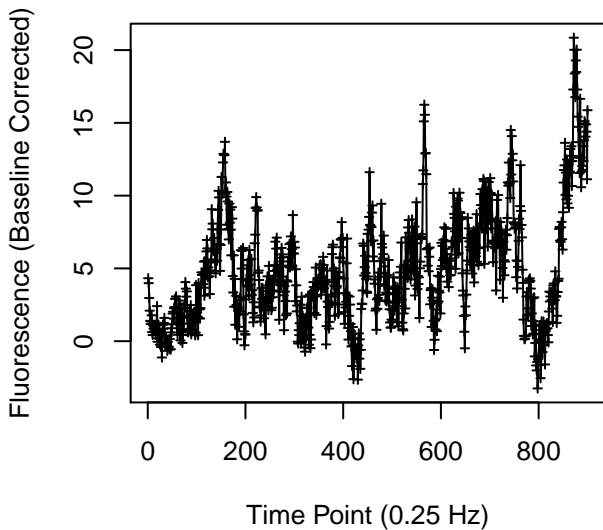

**Cell 368**

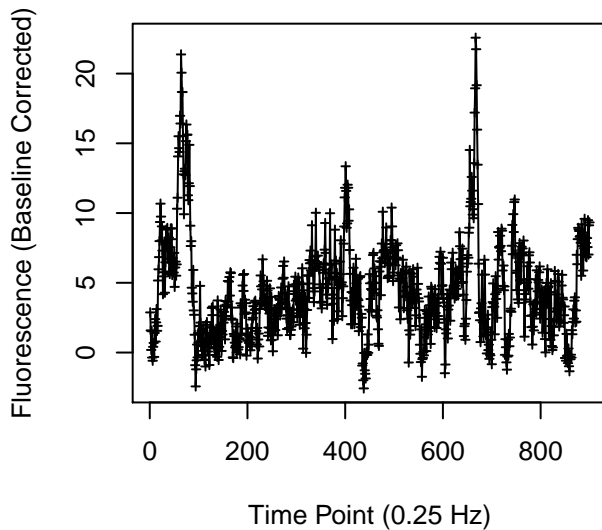

**Cell 369**

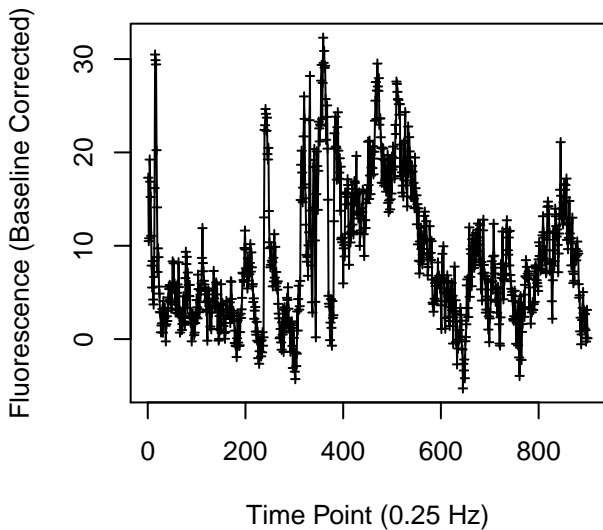

**Cell 370**

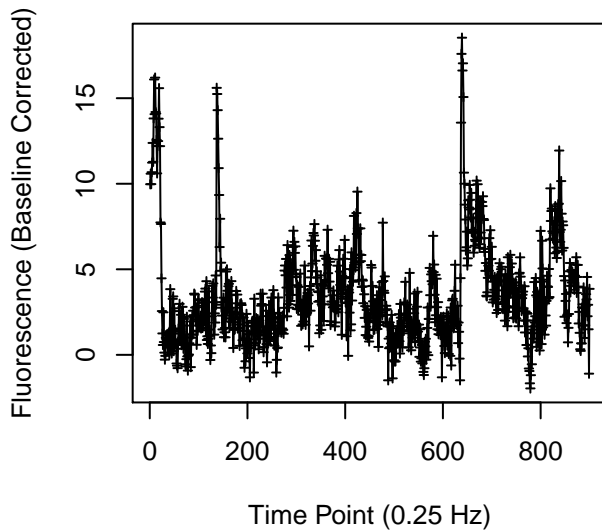

**Cell 371**

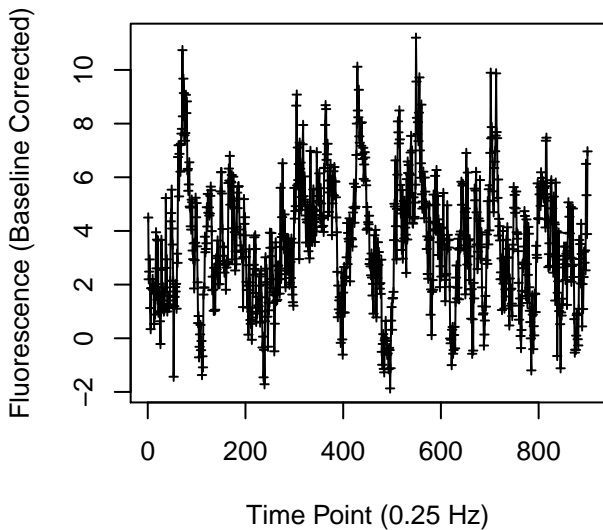

**Cell 372**

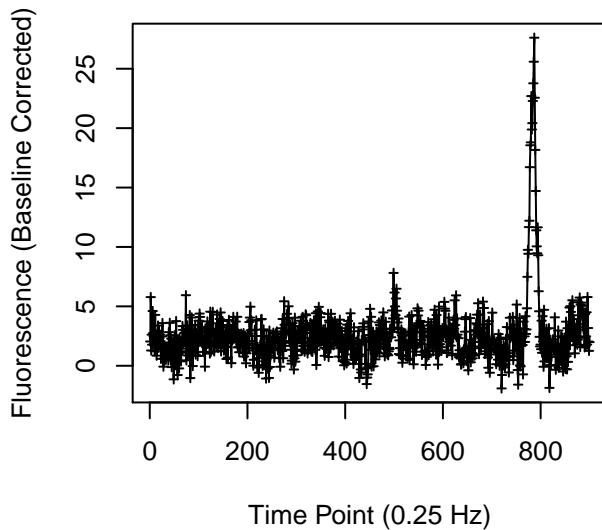

**Cell 373**

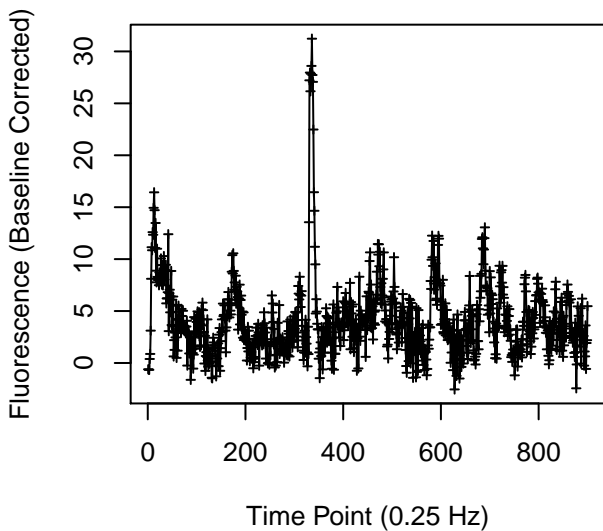

**Cell 374**

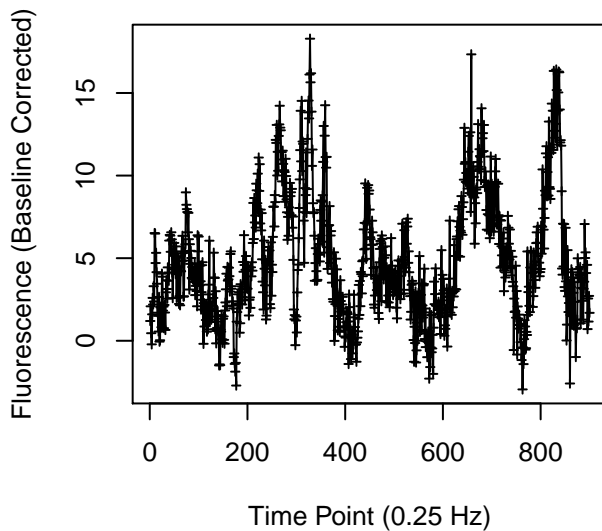

**Cell 375**

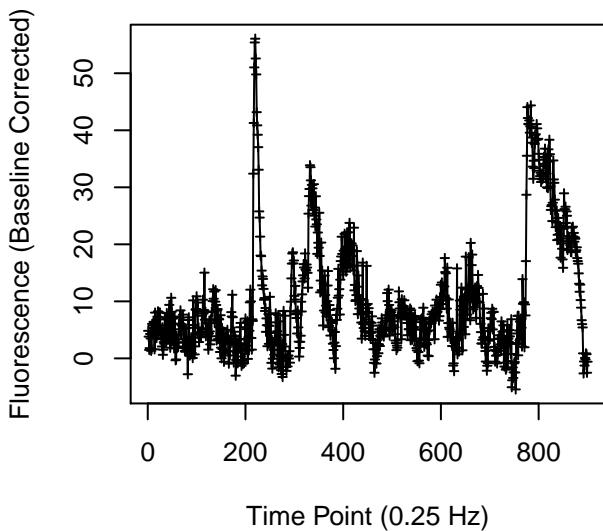

**Cell 376**

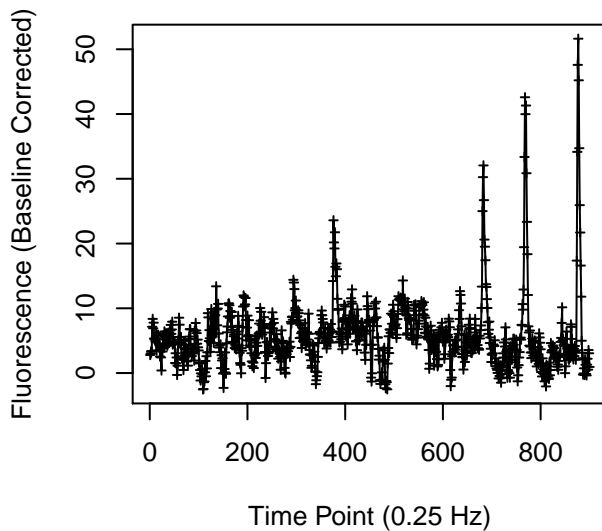

**Cell 377**

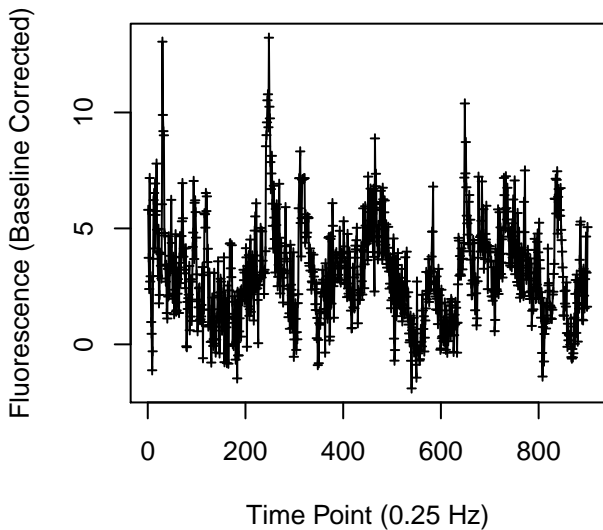

**Cell 378**

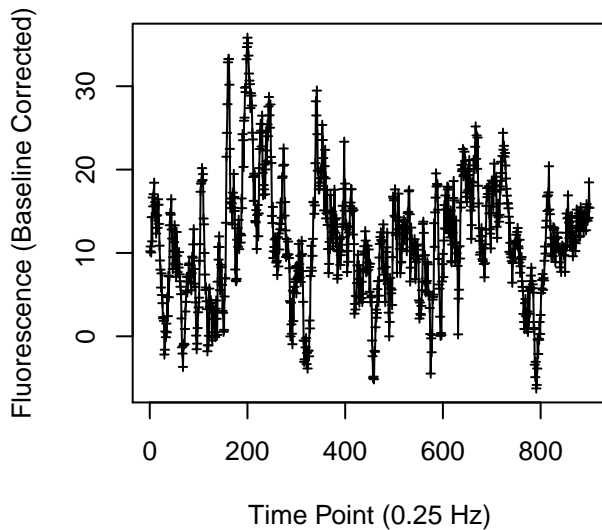

**Cell 379**

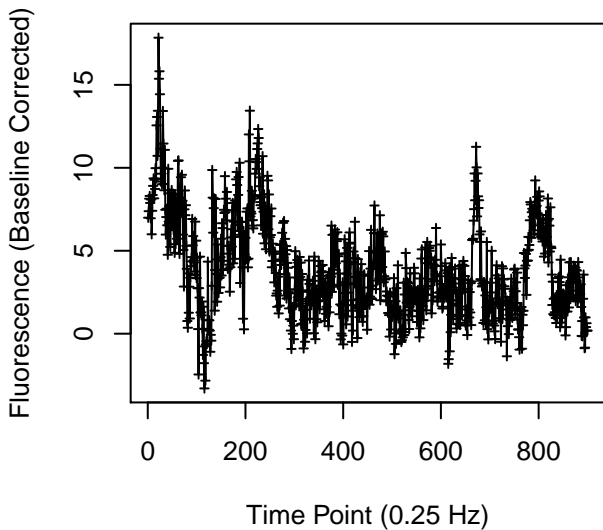

**Cell 380**

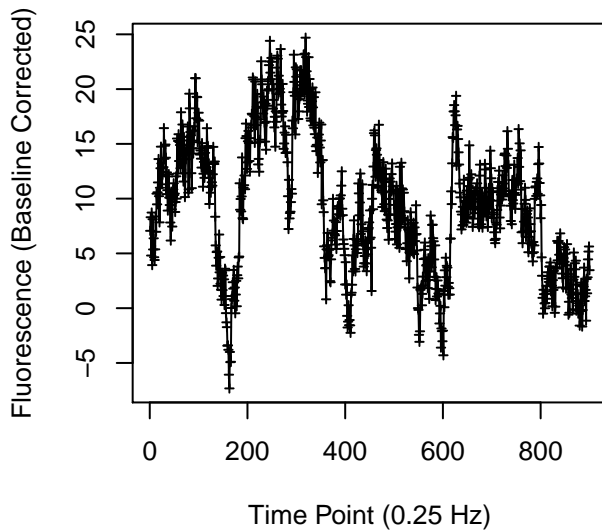

**Cell 381**

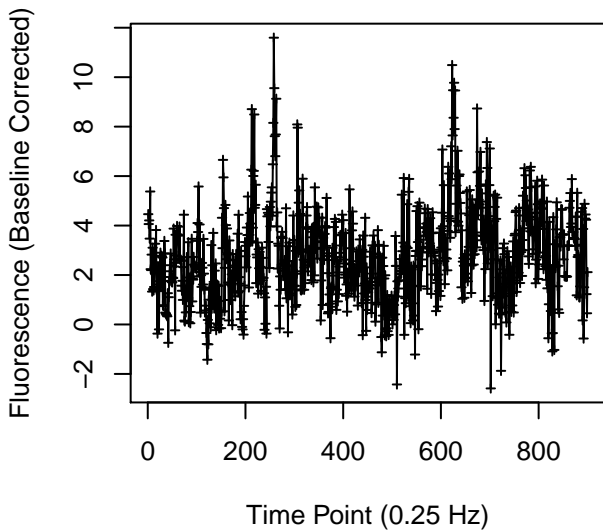

**Cell 382**

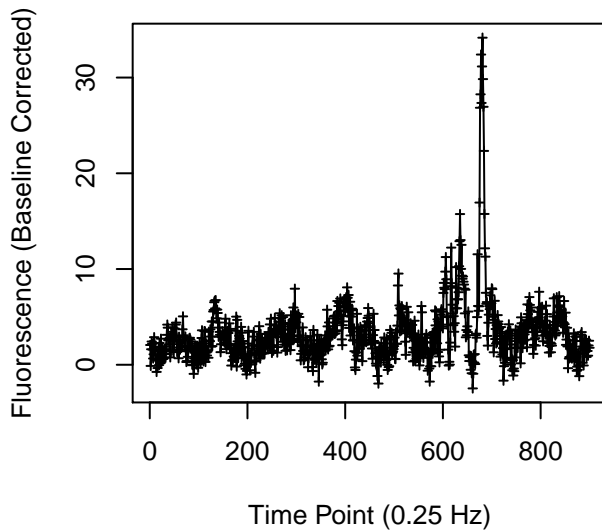

**Cell 383**

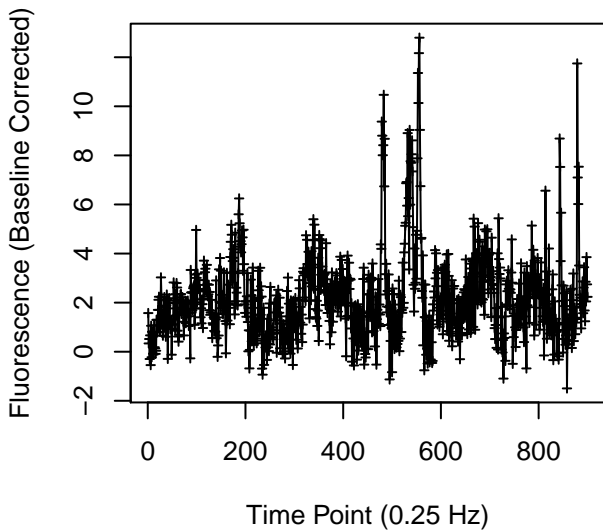

**Cell 384**

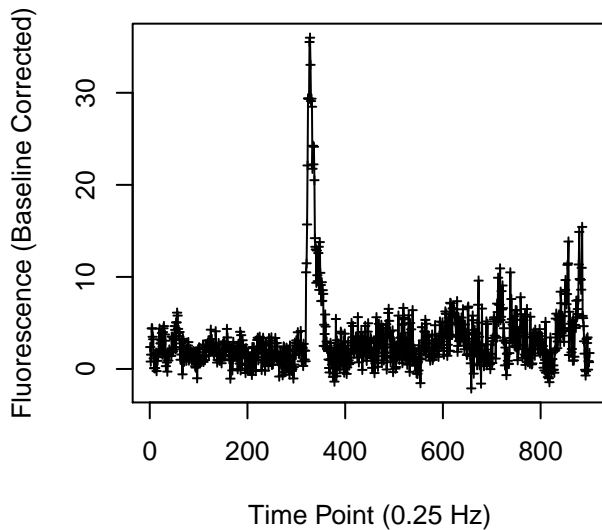

**Cell 385**

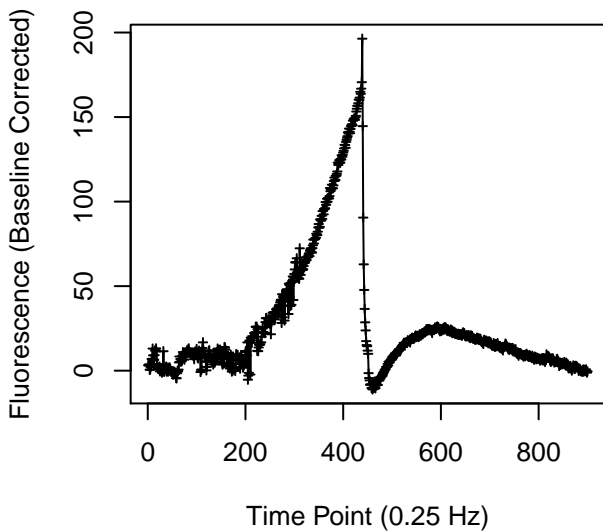

**Cell 386**

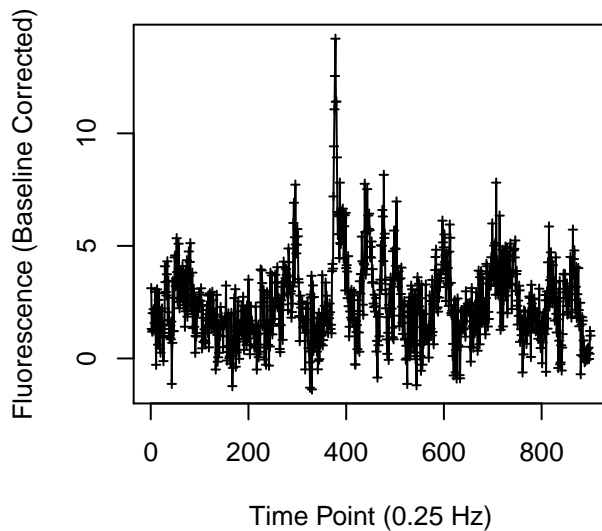

**Cell 387**

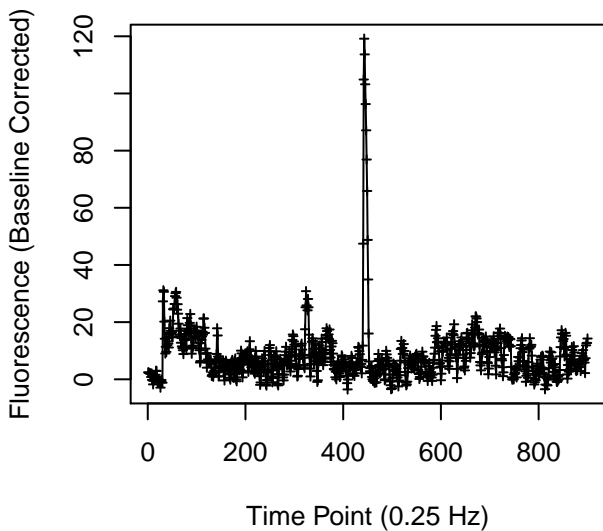

**Cell 388**

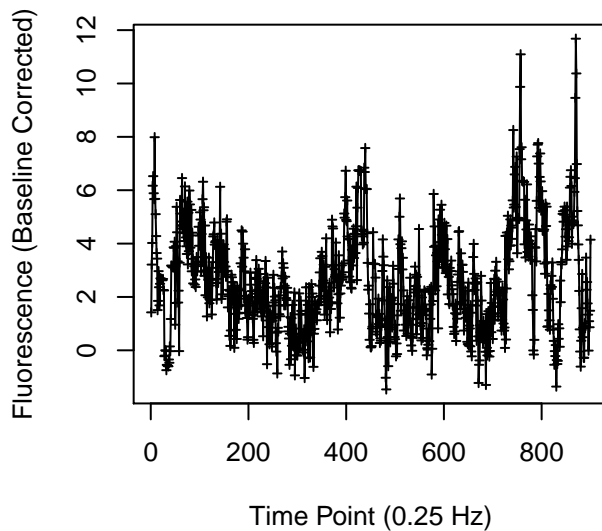

**Cell 389**

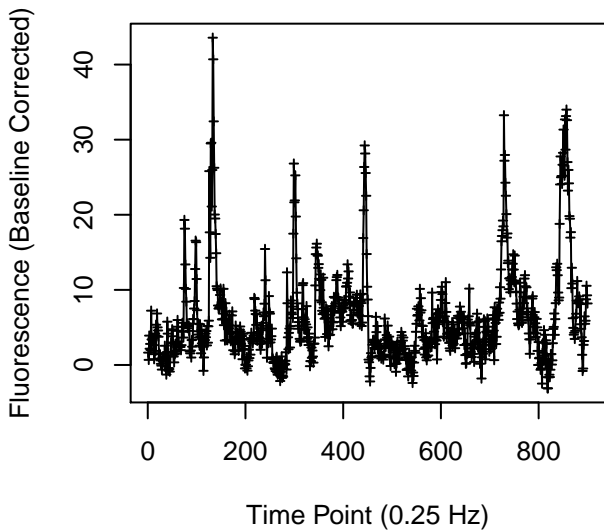

**Cell 390**

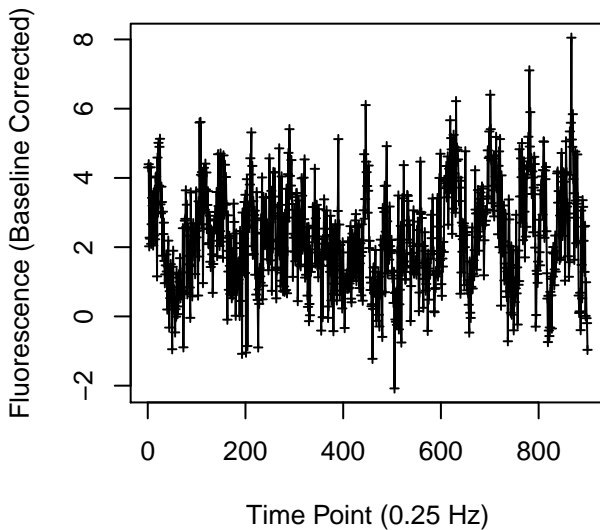

**Cell 391**

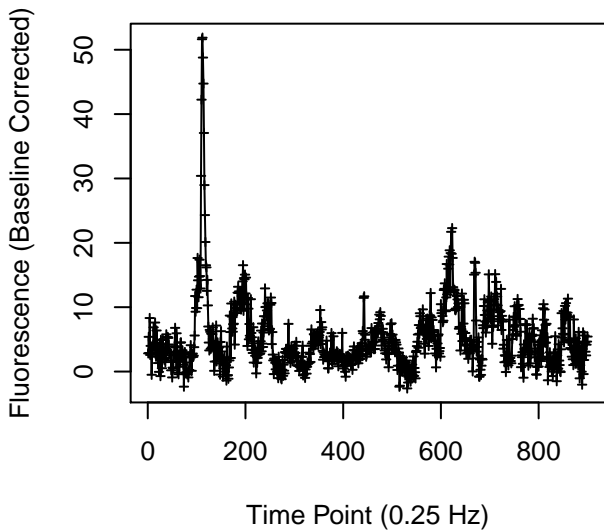

**Cell 392**

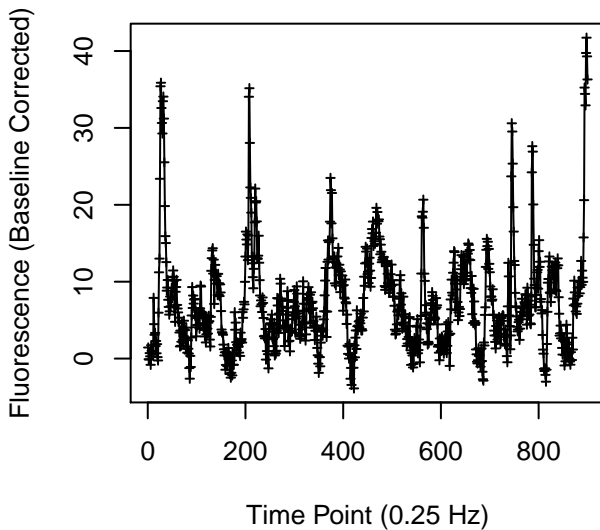

**Cell 393**

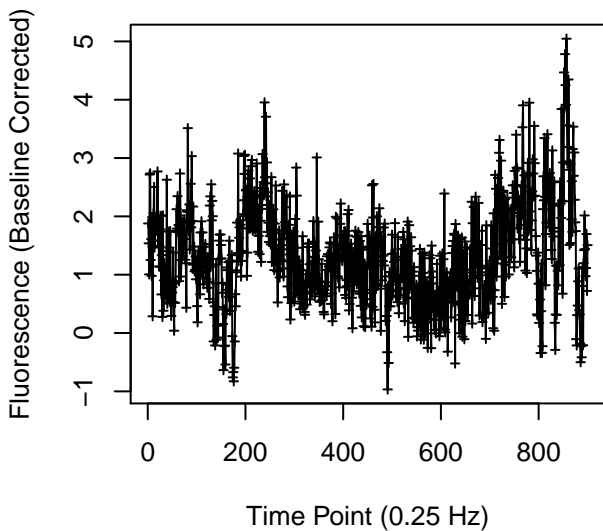

**Cell 394**

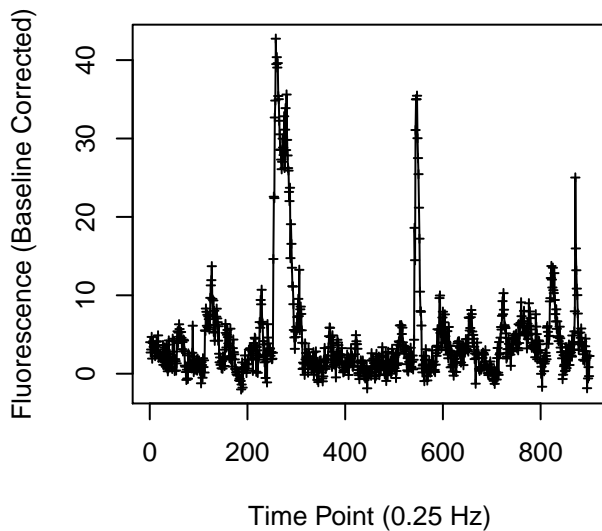

**Cell 395**

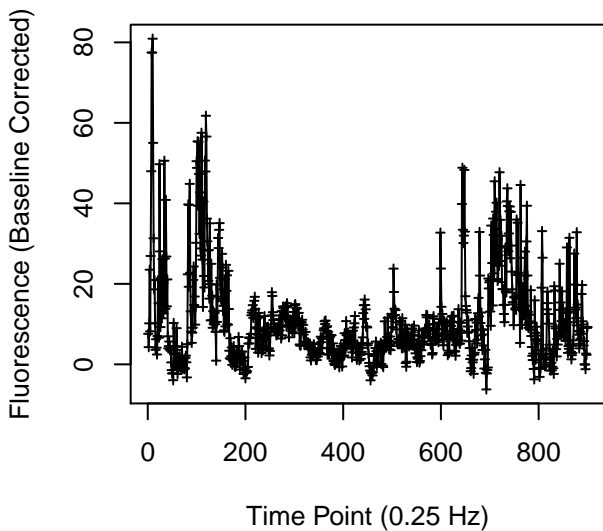

**Cell 396**

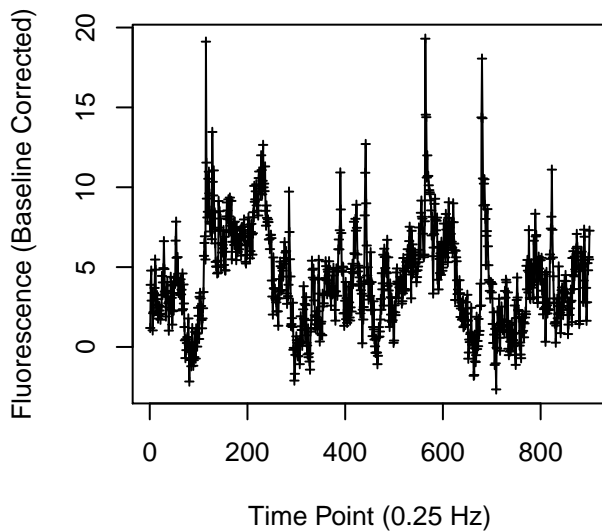

**Cell 397**

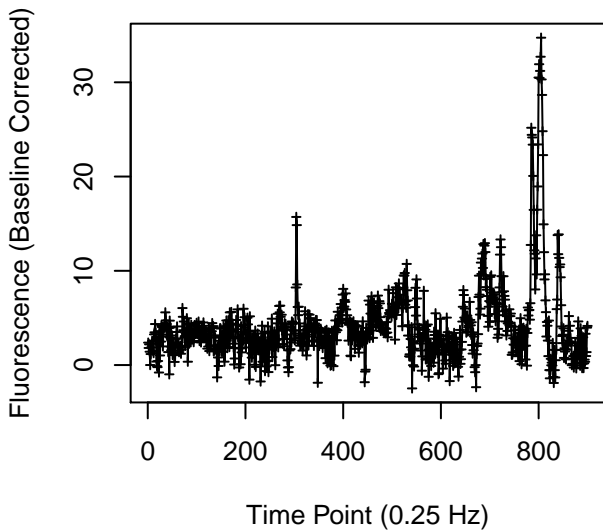

**Cell 398**

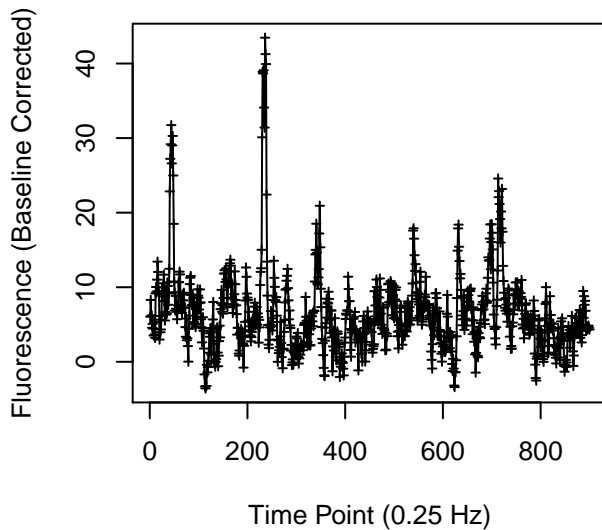

**Cell 399**

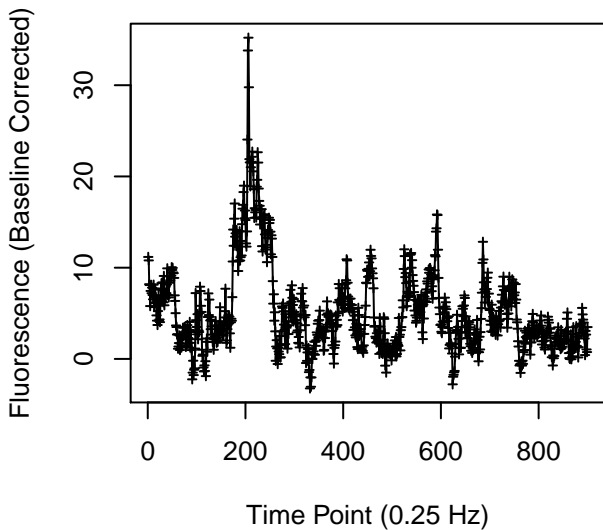

**Cell 400**

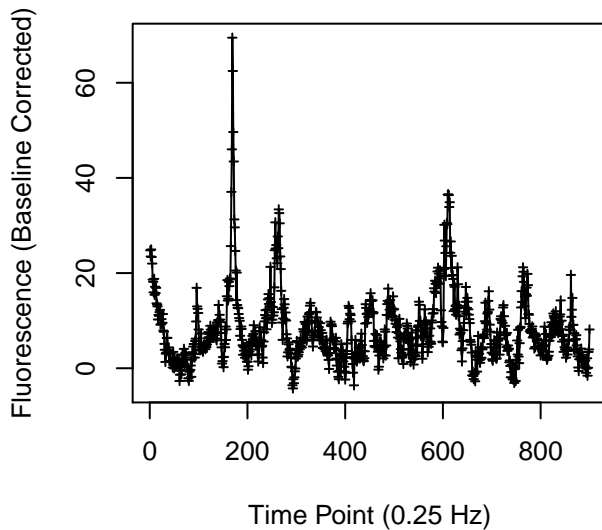

**Cell 401**

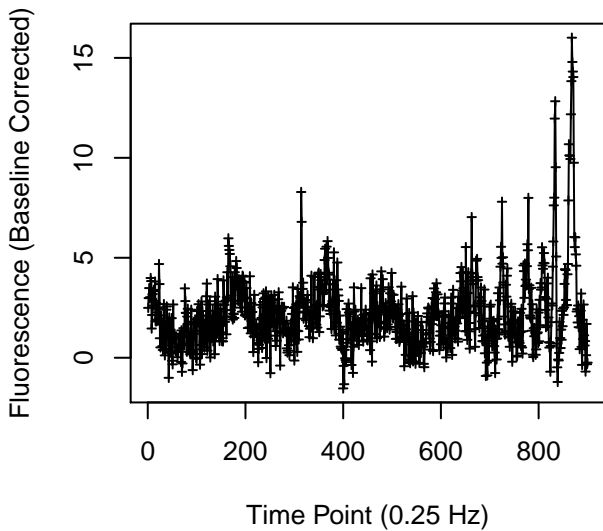

**Cell 402**

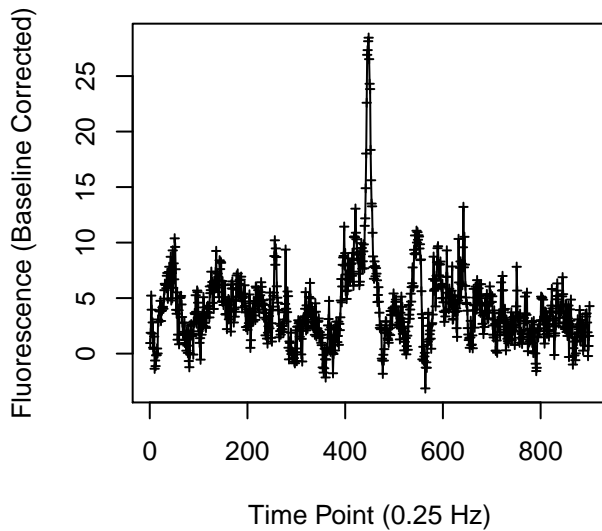

**Cell 403**

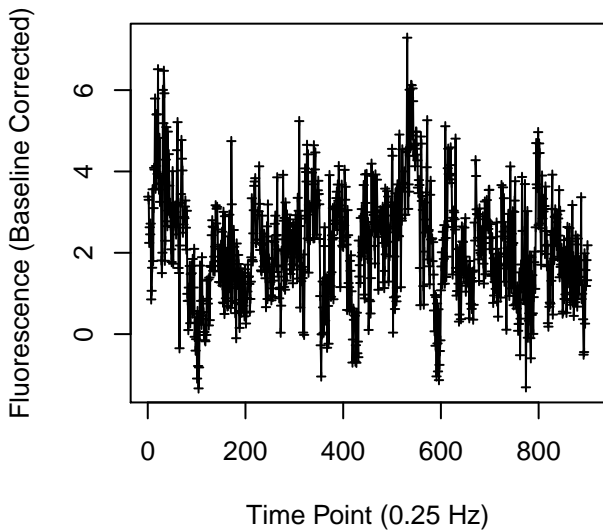

**Cell 404**

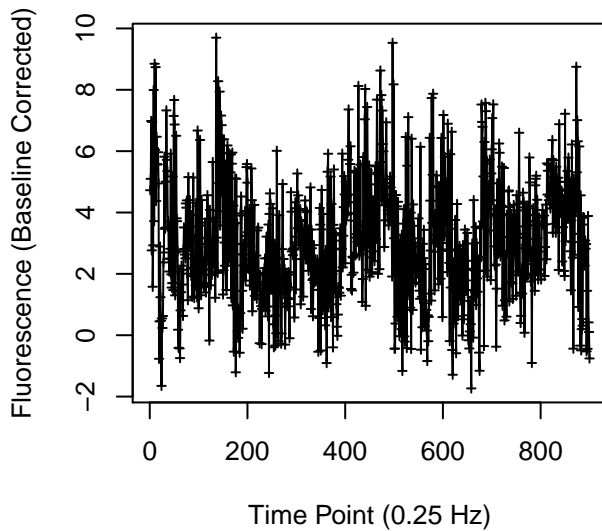

**Cell 405**

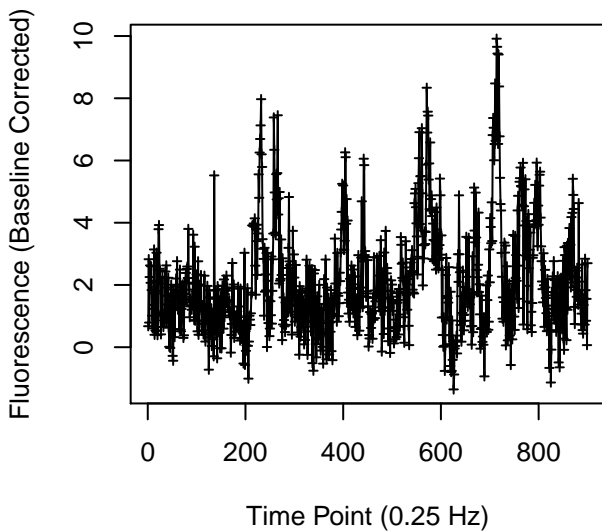

**Cell 406**

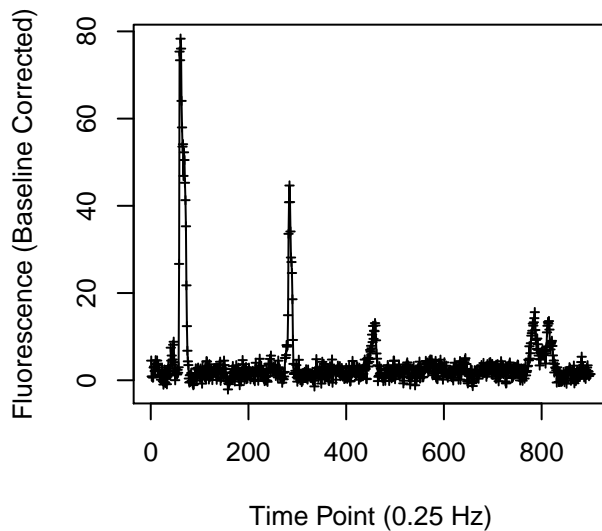

**Cell 407**

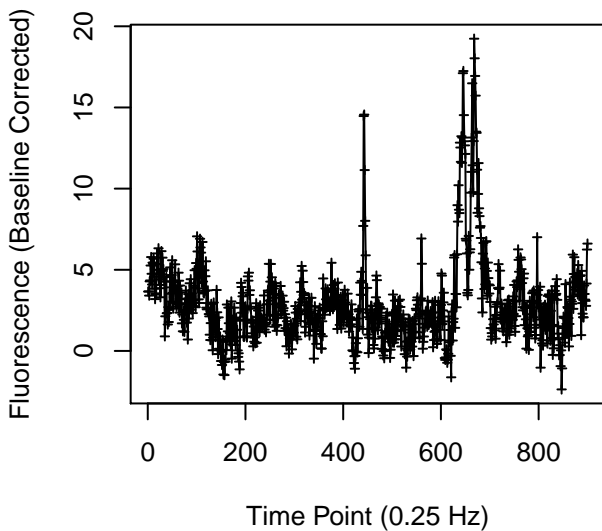

**Cell 408**

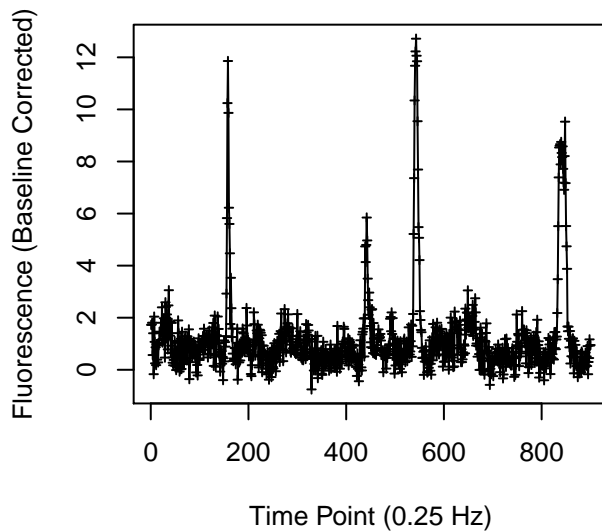

**Cell 409**

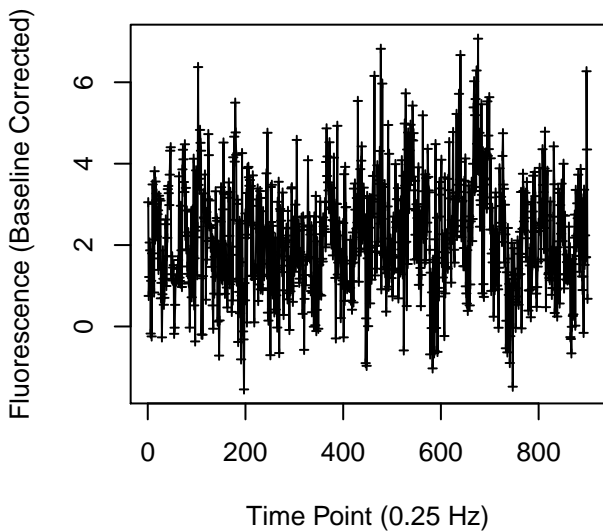

**Cell 410**

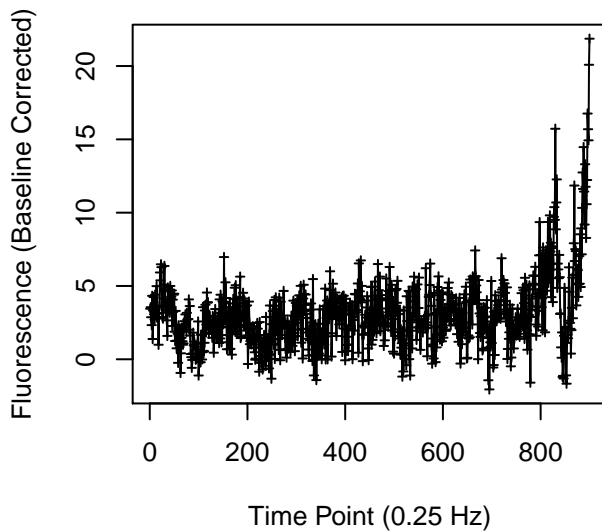

**Cell 411**

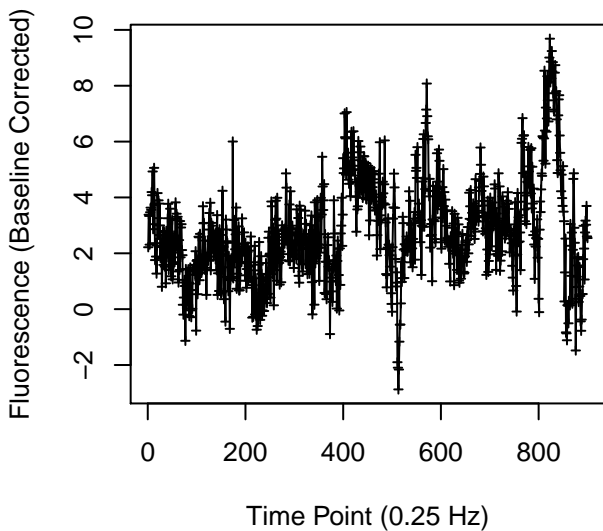

**Cell 412**

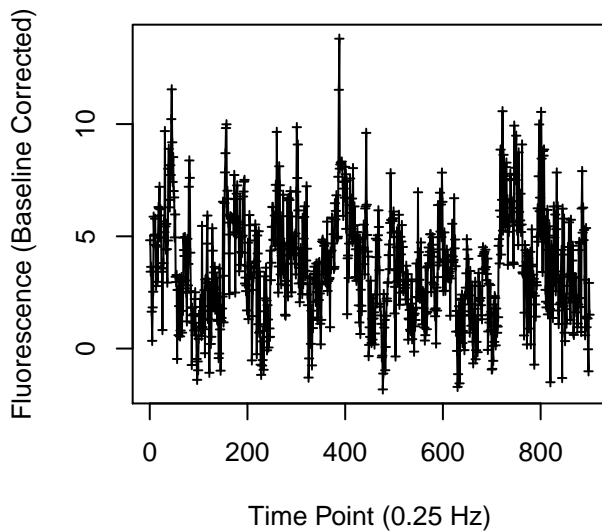

**Cell 413**

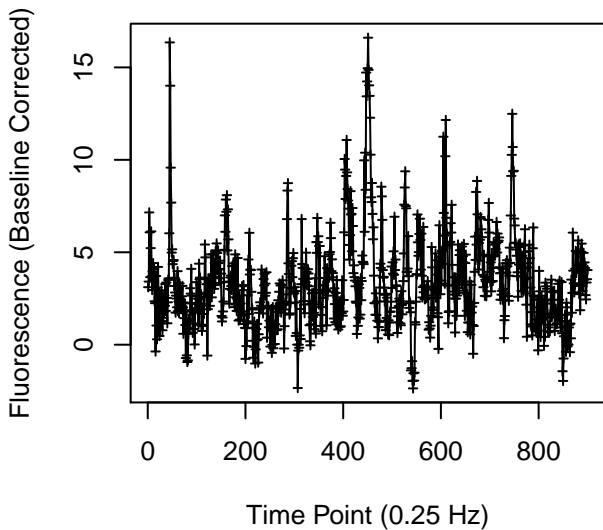

**Cell 414**

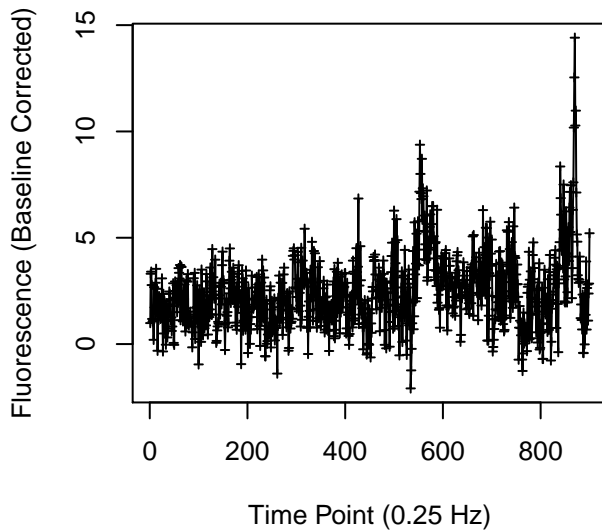

**Cell 415**

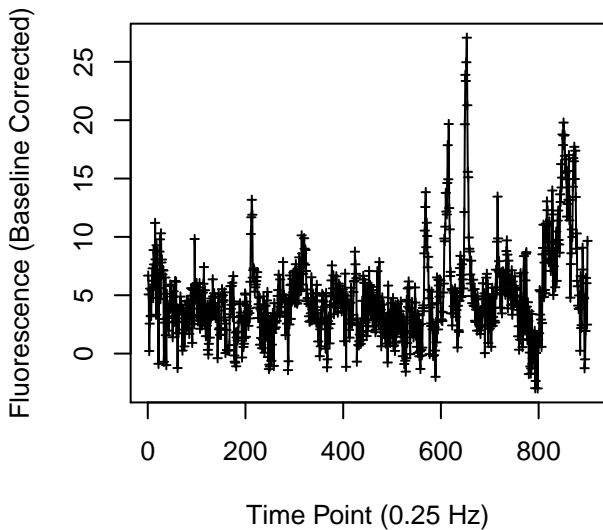

**Cell 416**

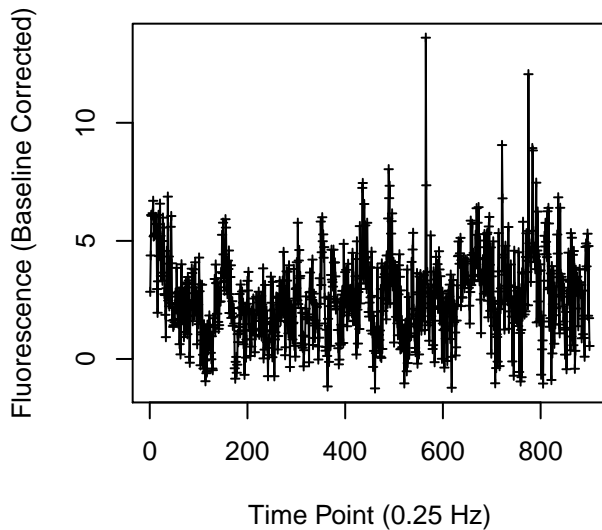

**Cell 417**

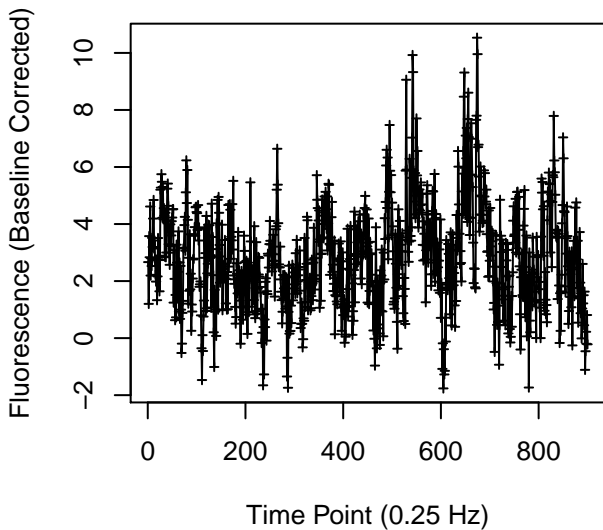

**Cell 418**

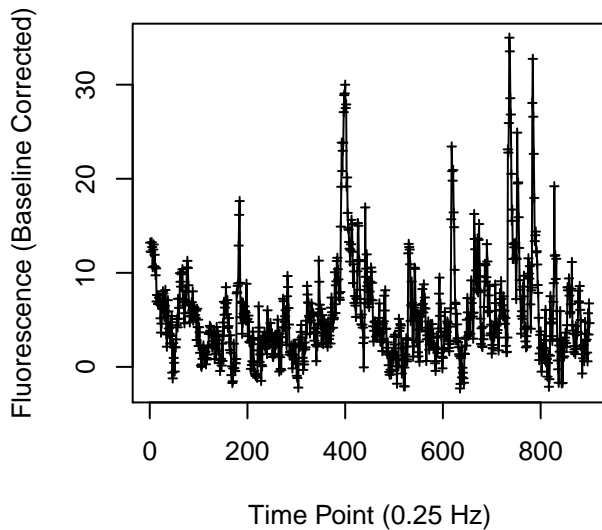

**Cell 419**

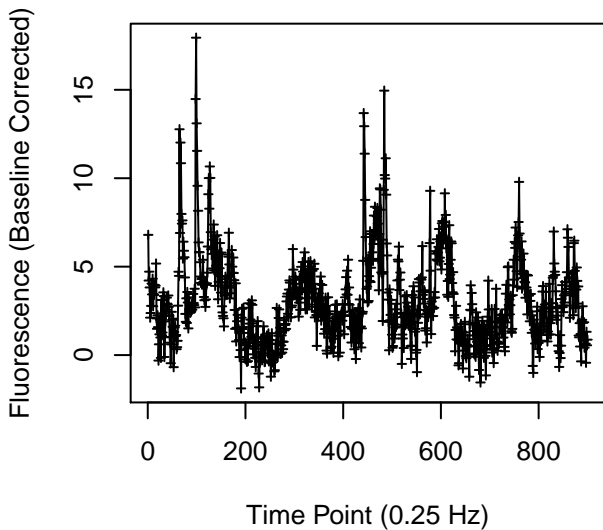

**Cell 420**

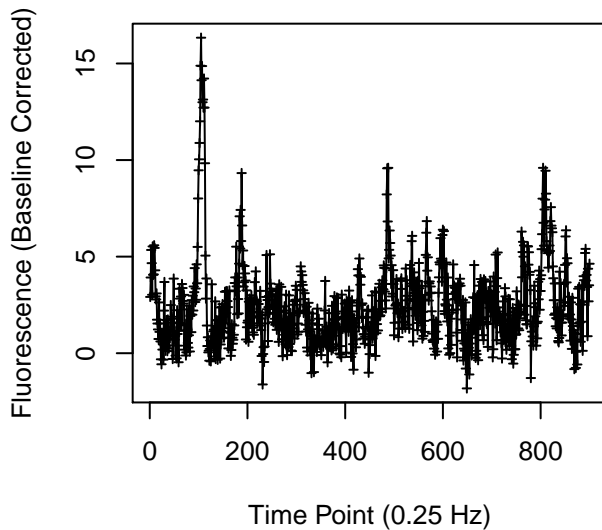

**Cell 421**

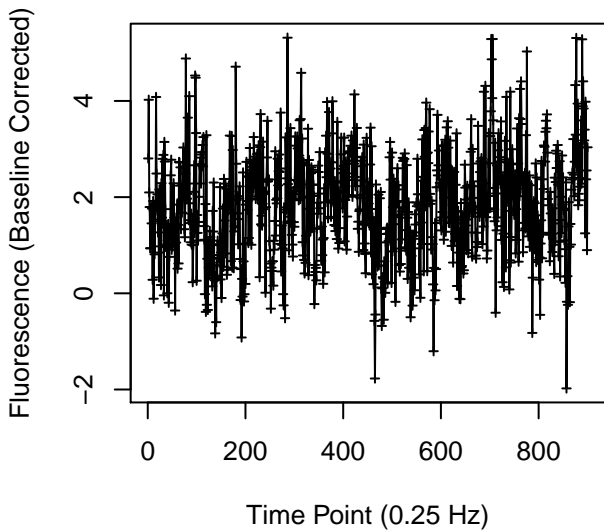

**Cell 422**

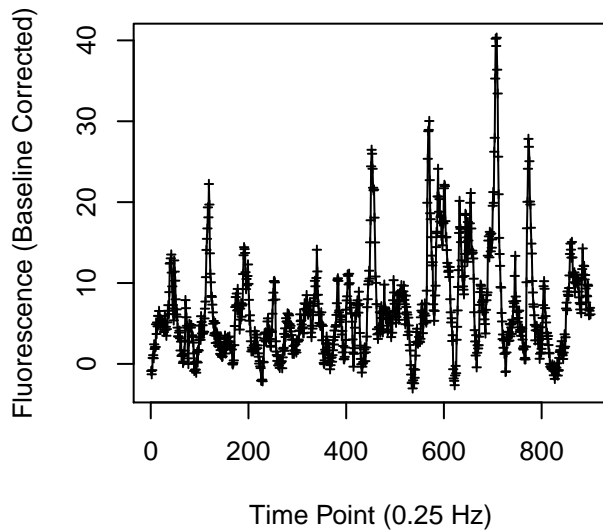

**Cell 423**

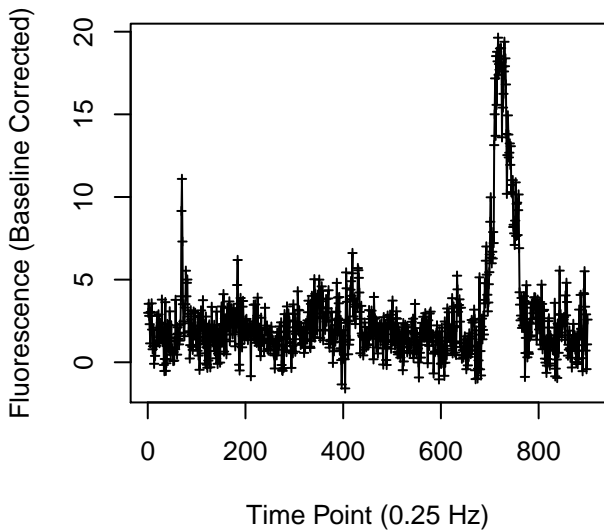

**Cell 424**

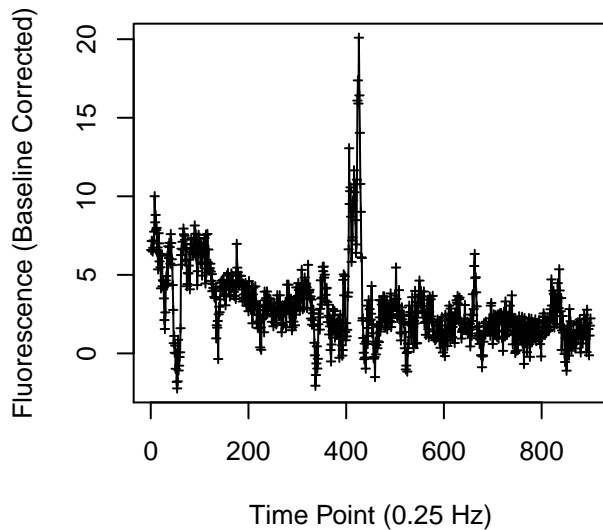

**Cell 425**

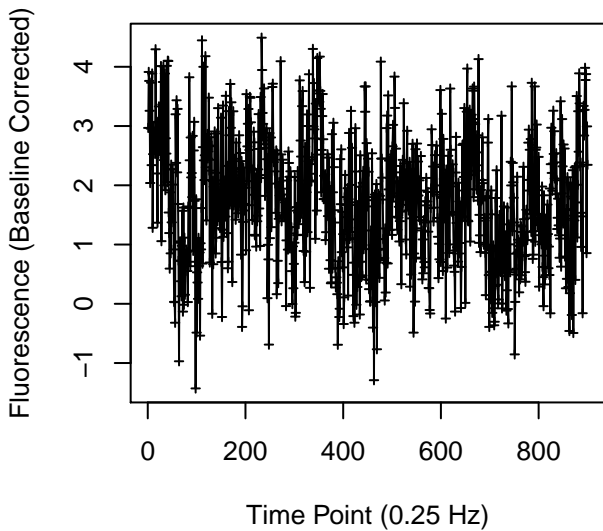

**Cell 426**

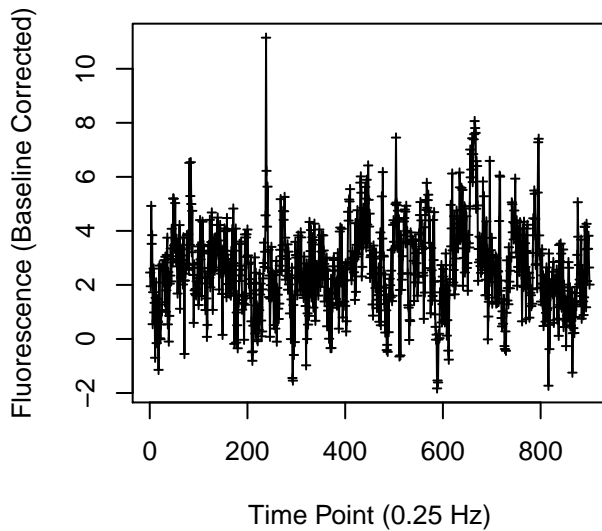

**Cell 427**

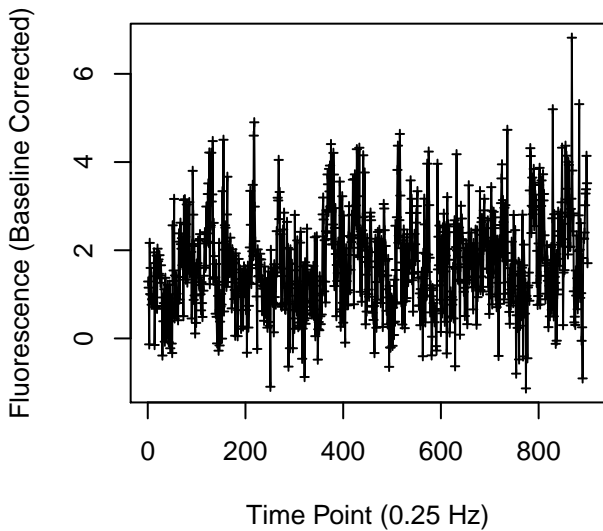

**Cell 428**

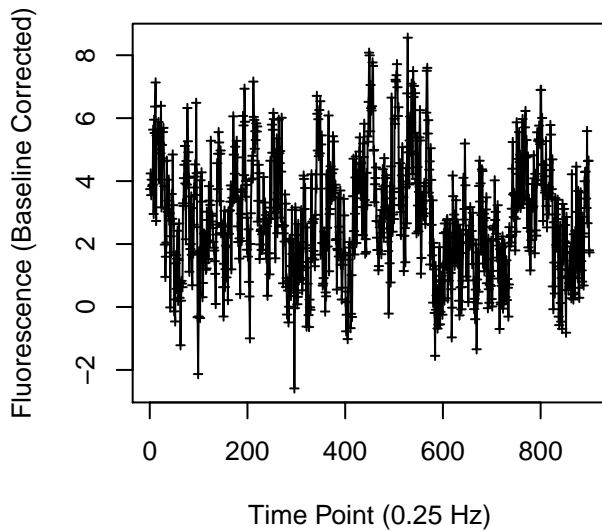

**Cell 429**

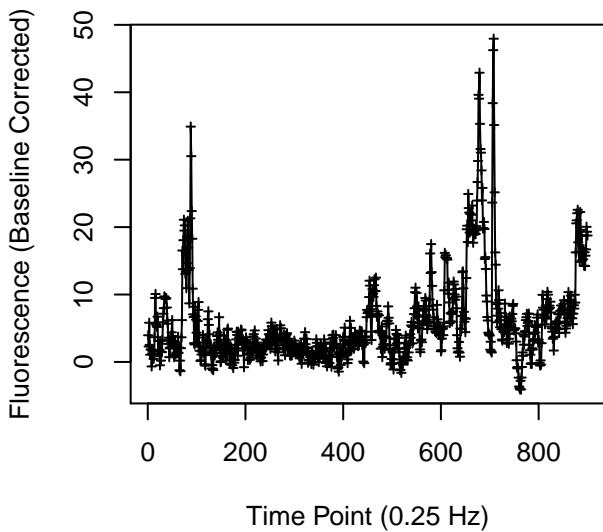

**Cell 430**

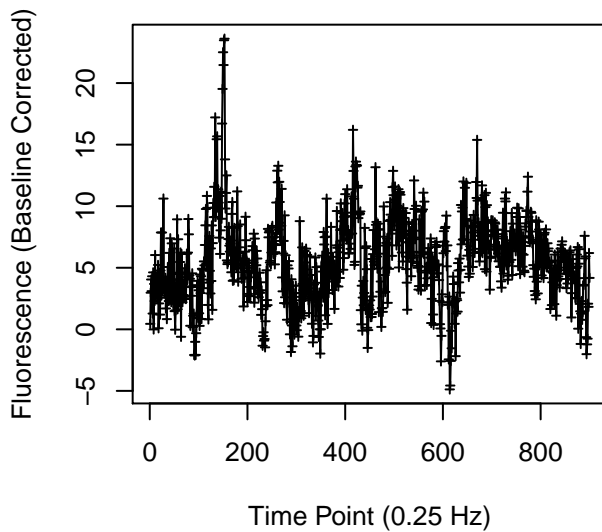

**Cell 431**

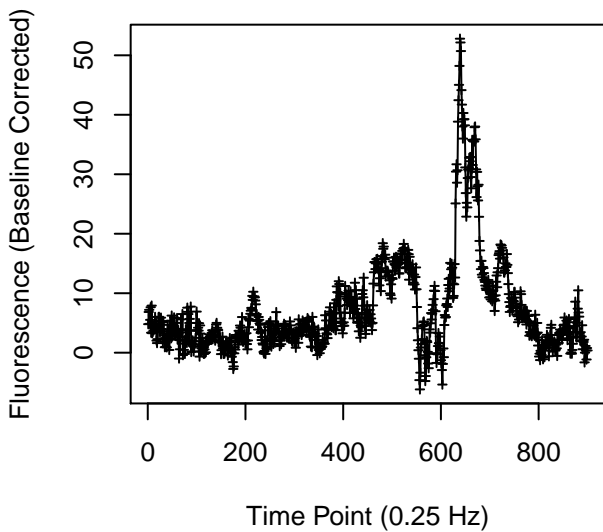

**Cell 432**

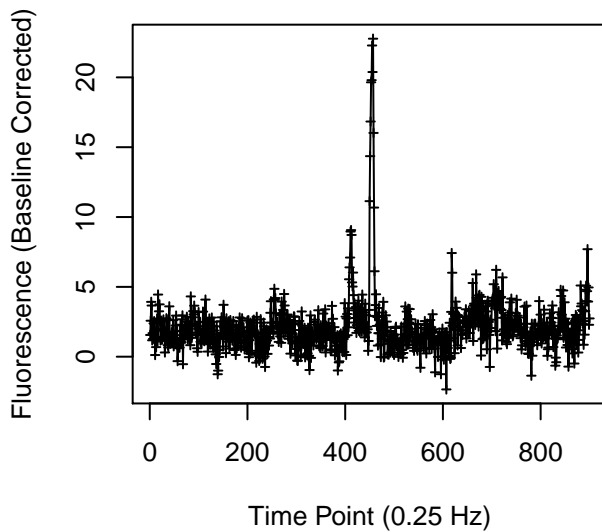

**Cell 433**

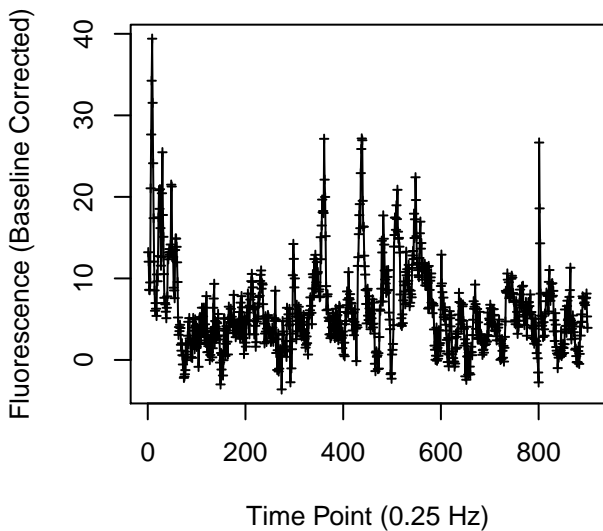

**Cell 434**

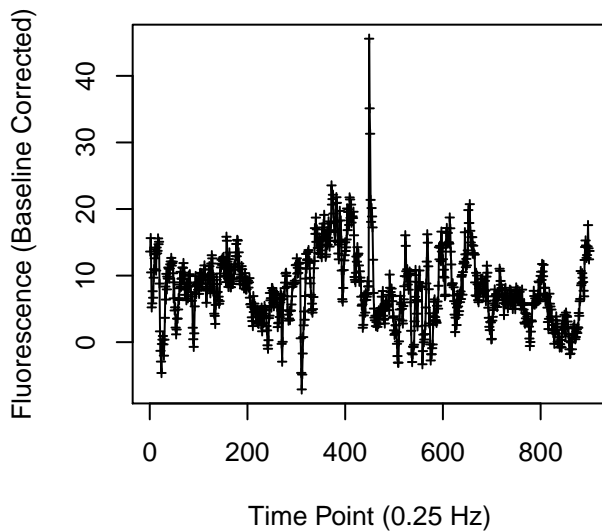

**Cell 435**

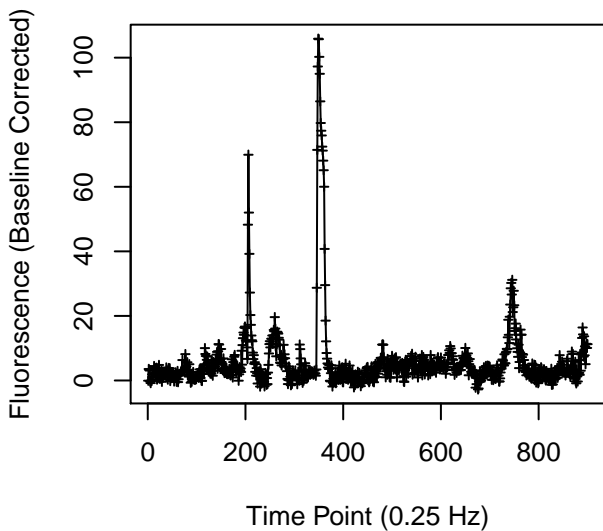

**Cell 436**

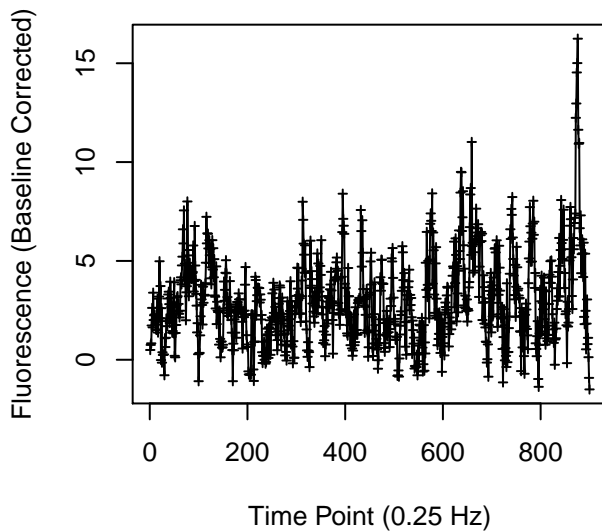

**Cell 437**

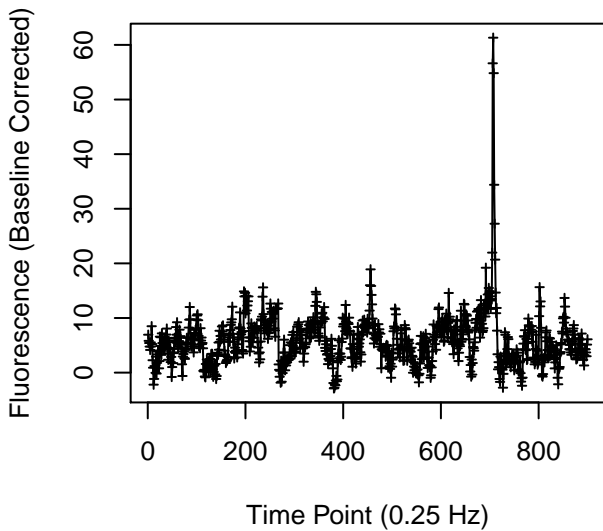

**Cell 438**

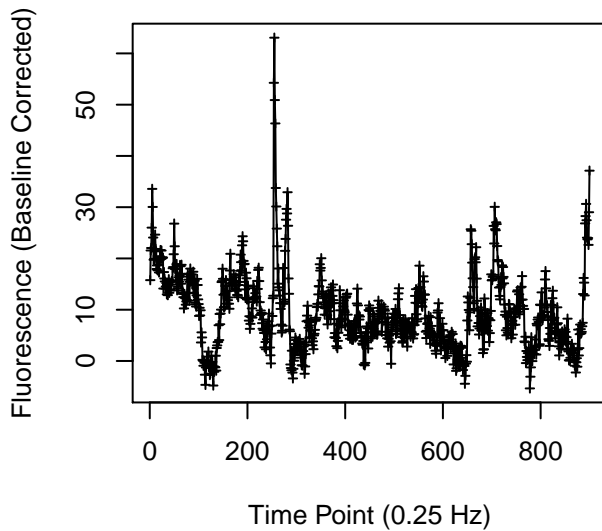

**Cell 439**

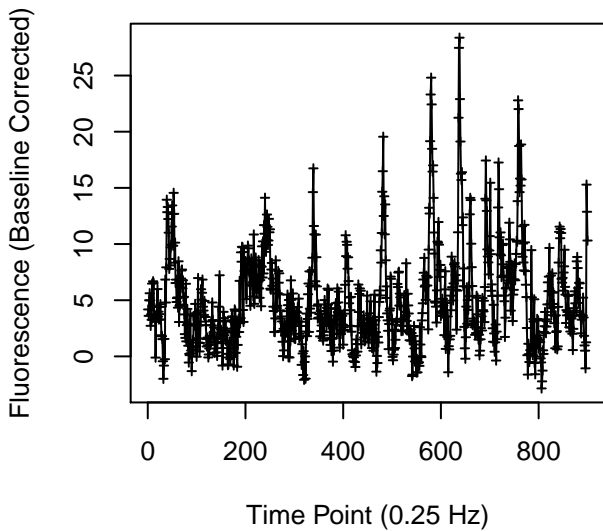

**Cell 440**

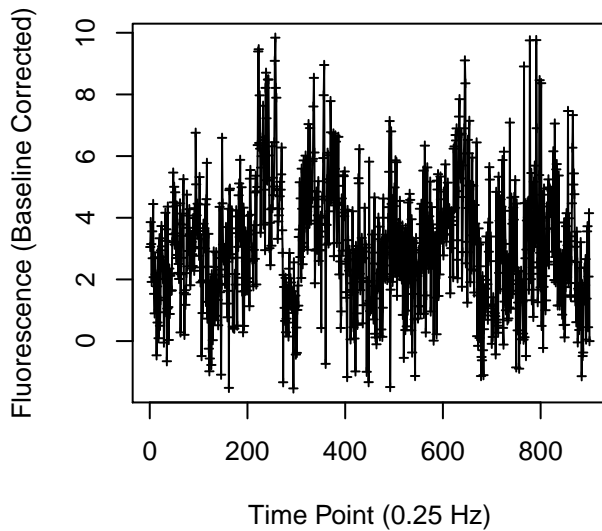

**Cell 441**

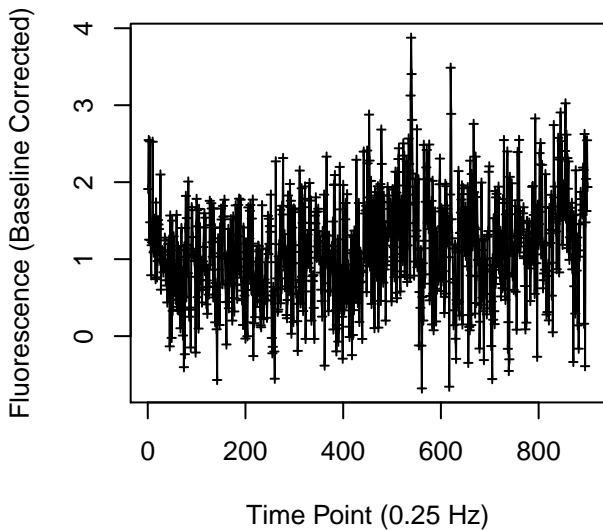

**Cell 442**

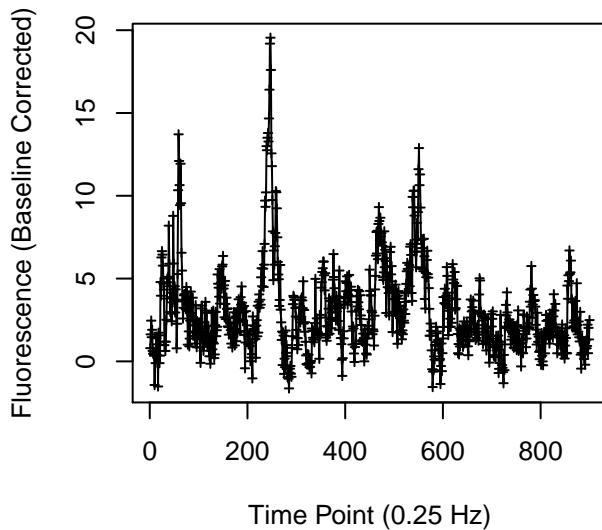

**Cell 443**

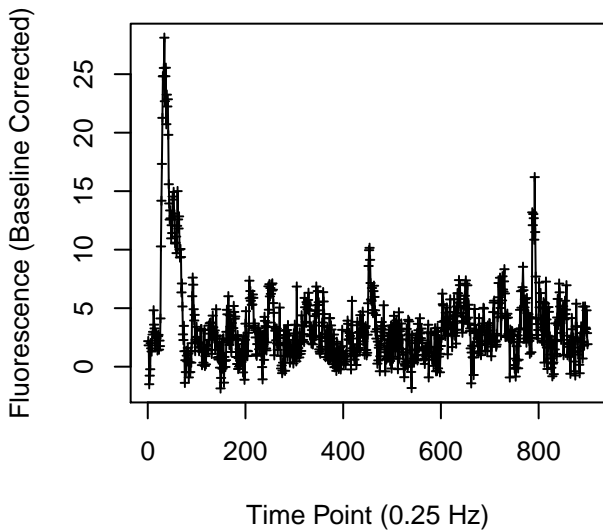

**Cell 444**

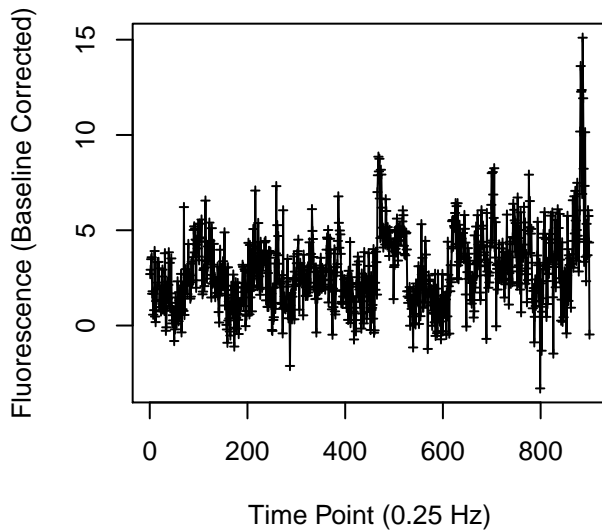

**Cell 445**

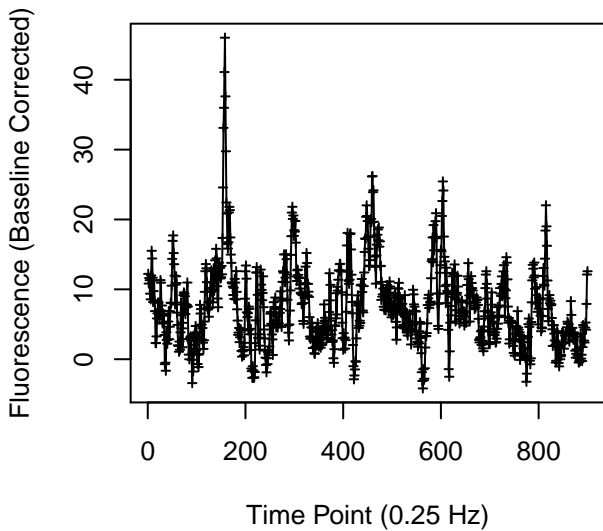

**Cell 446**

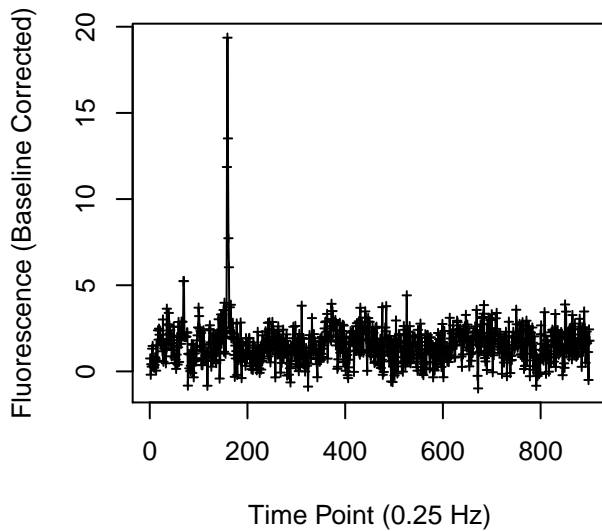

**Cell 447**

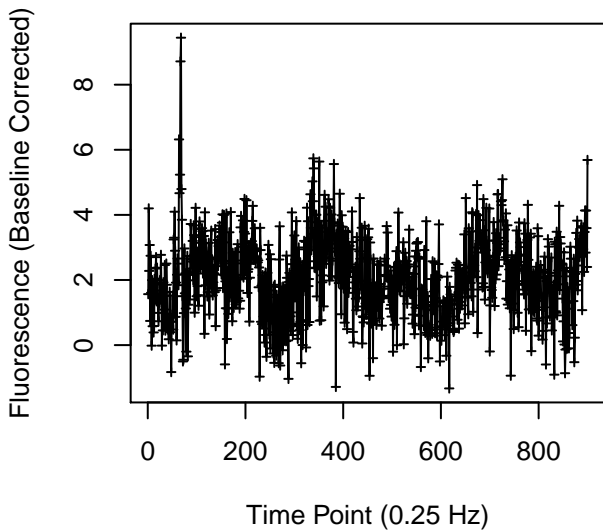

**Cell 448**

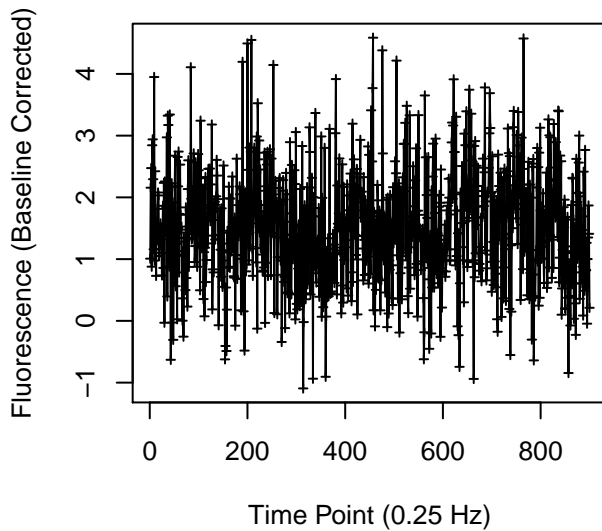

**Cell 449**

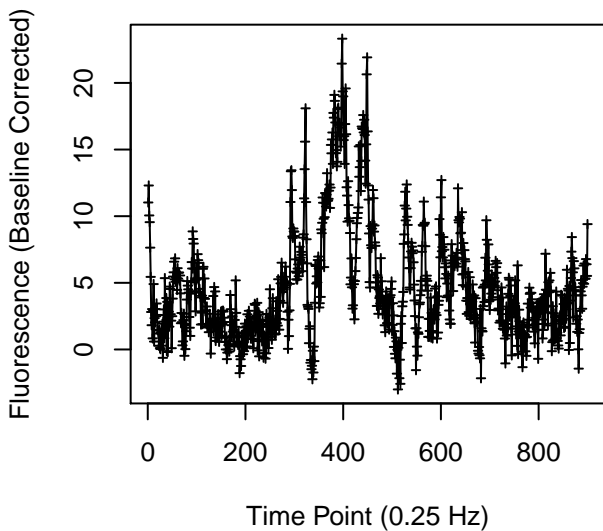

**Cell 450**

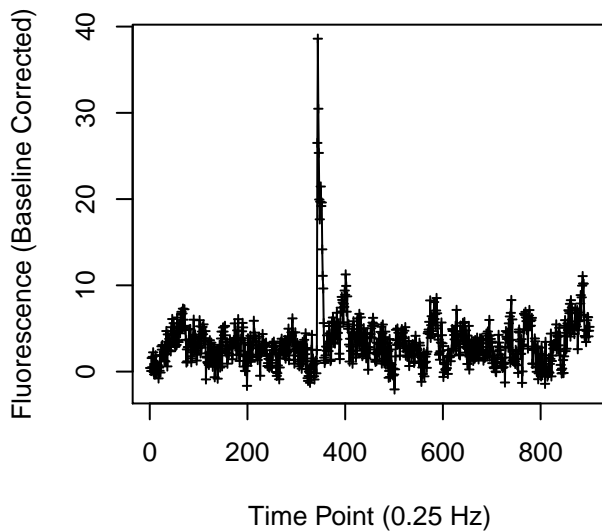

**Cell 451**

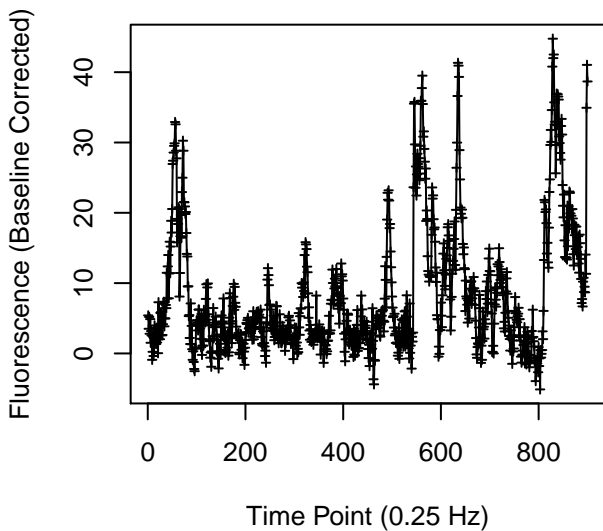

**Cell 452**

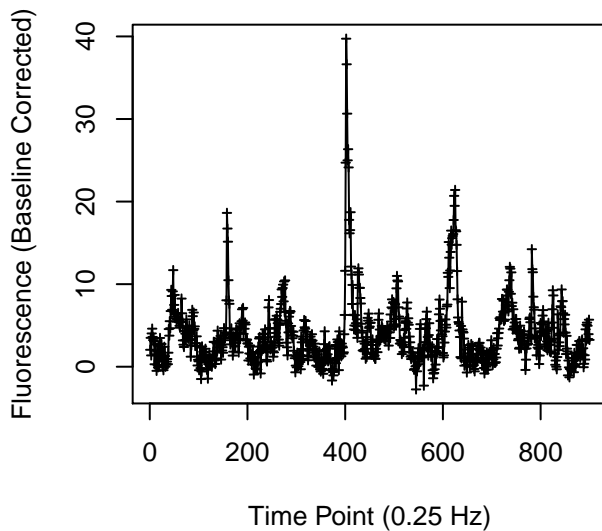

**Cell 453**

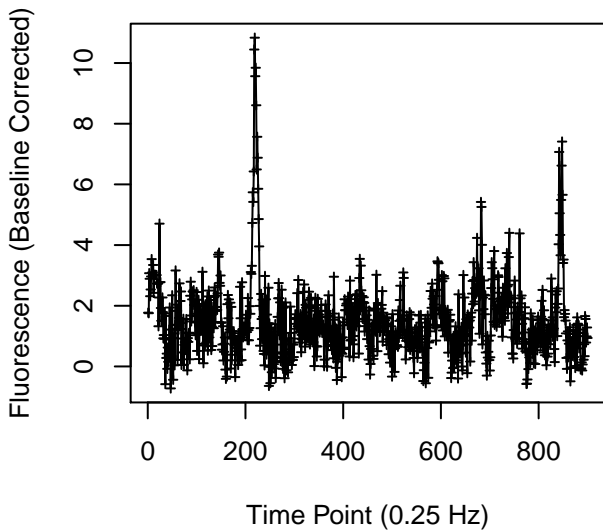

**Cell 454**

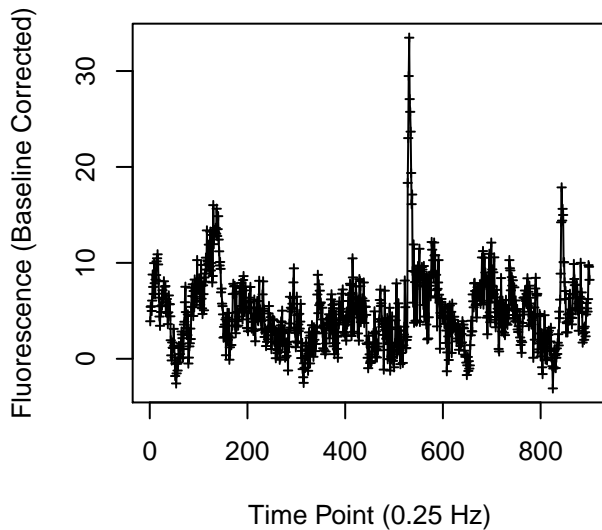

**Cell 455**

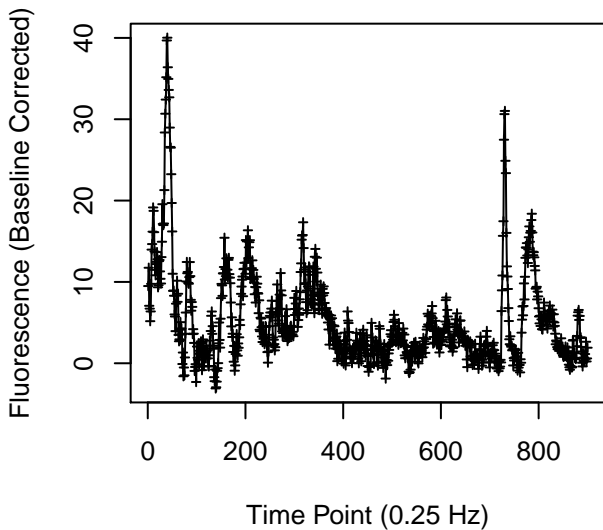

**Cell 456**

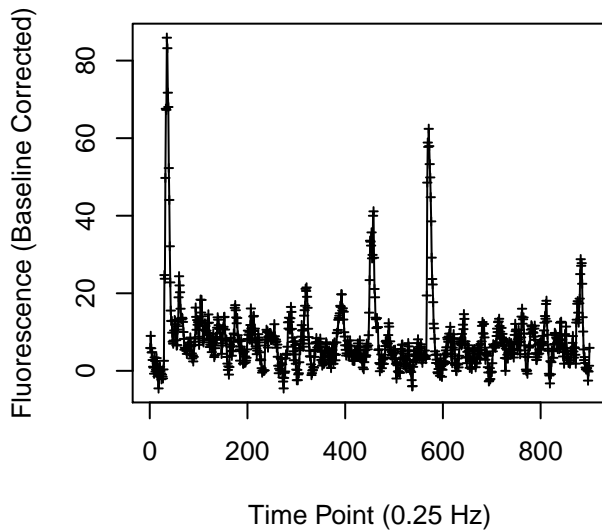

**Cell 457**

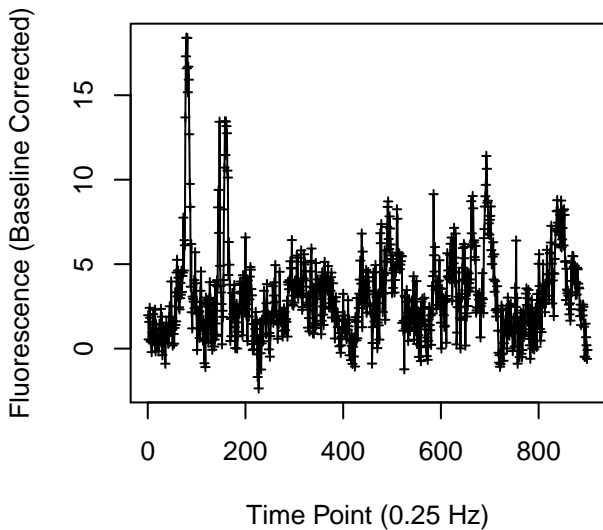

**Cell 458**

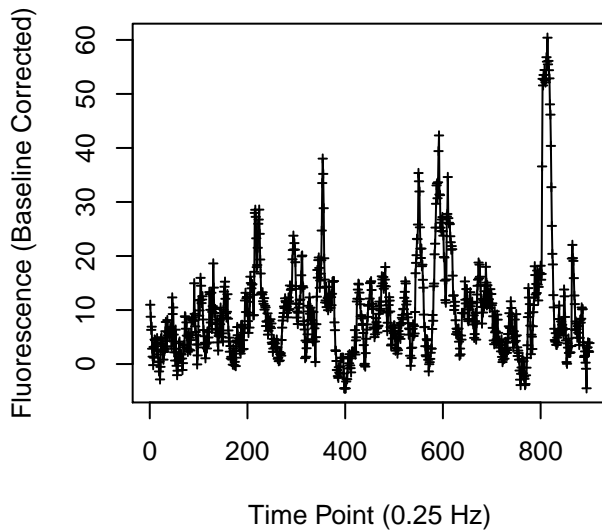

**Cell 459**

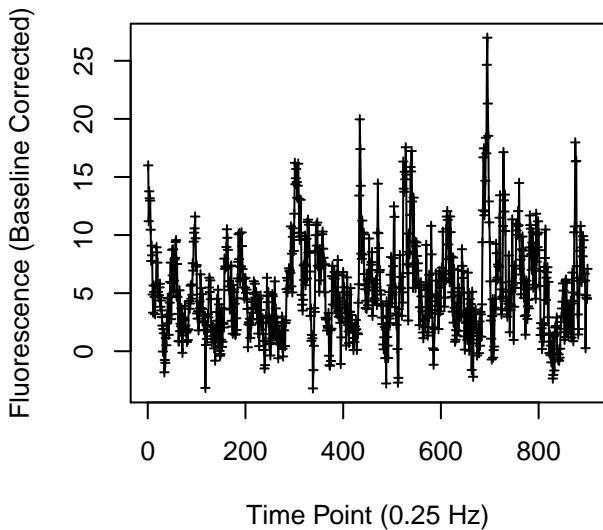

**Cell 460**

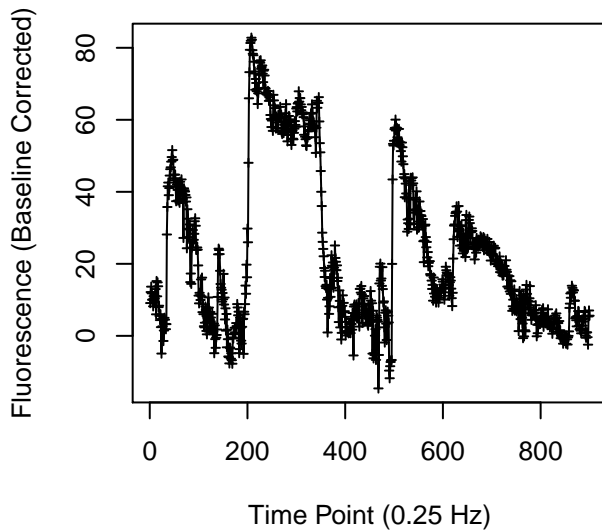

**Cell 461**

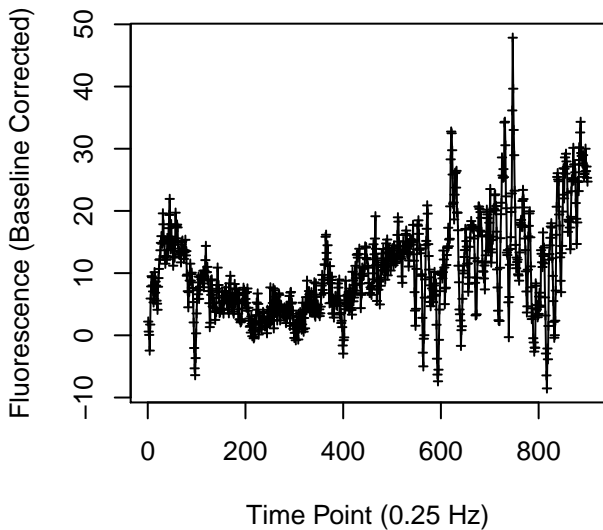

**Cell 462**

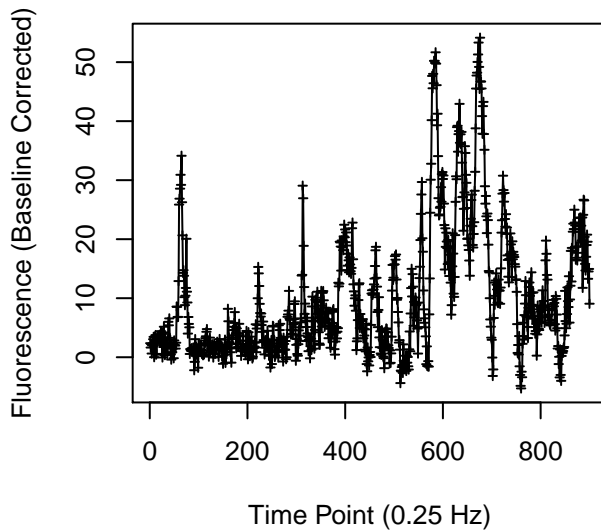

**Cell 463**

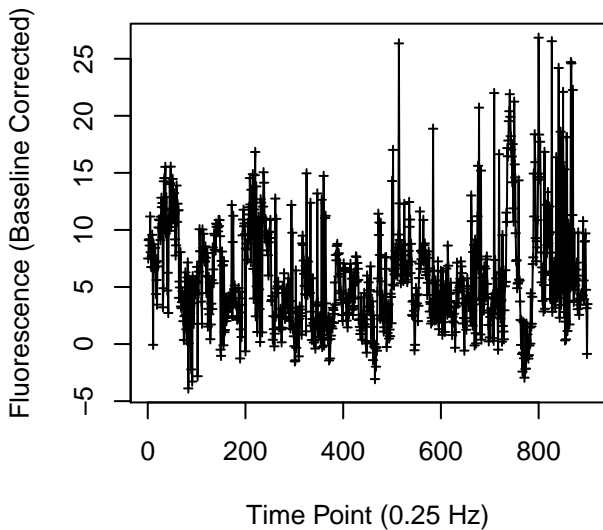

**Cell 464**

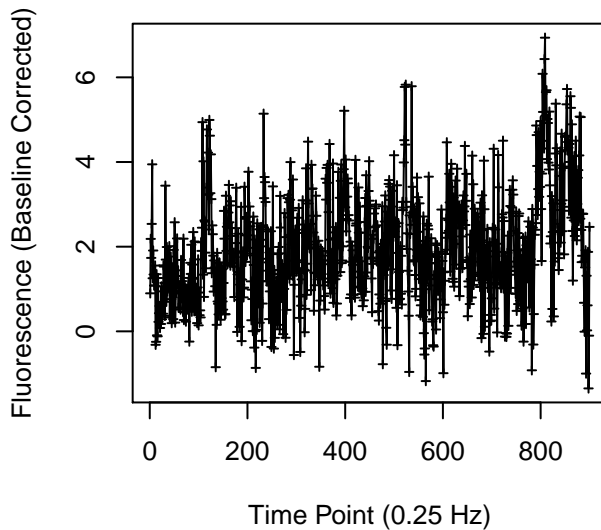

**Cell 465**

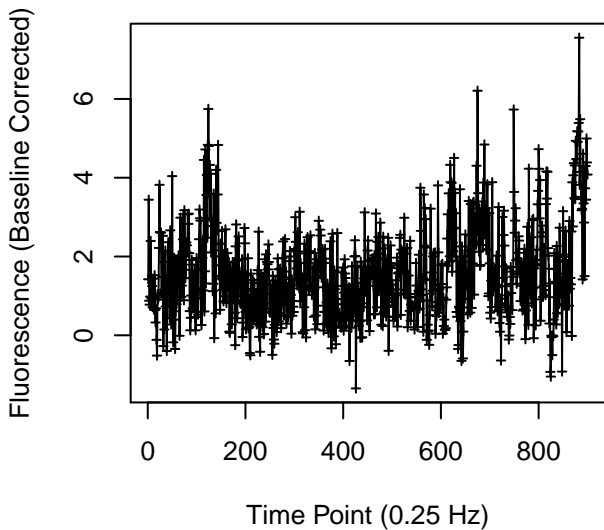

**Cell 466**

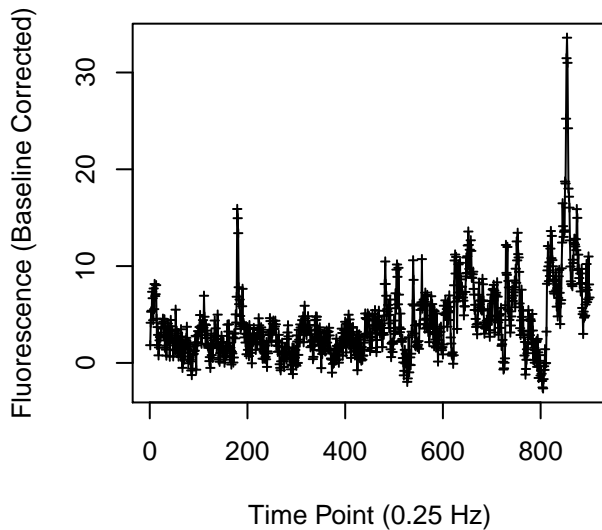

**Cell 467**

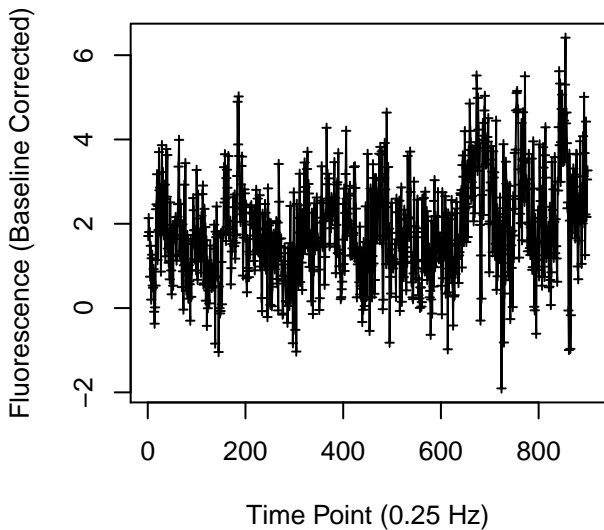

**Cell 468**

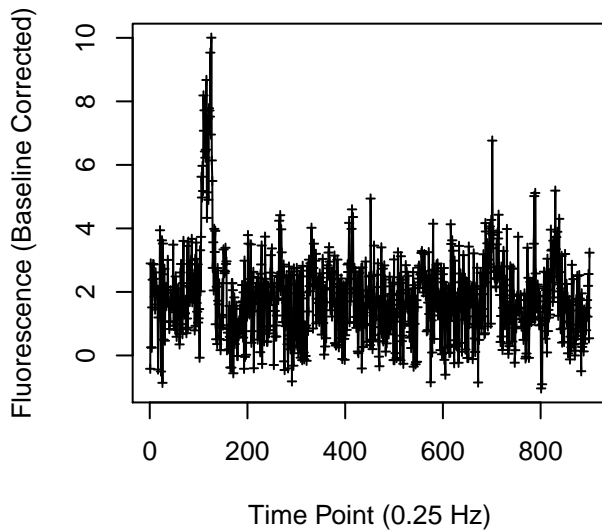

**Cell 469**

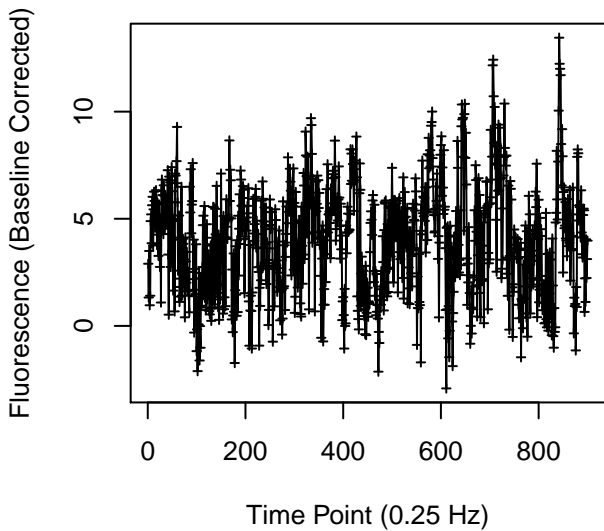

**Cell 470**

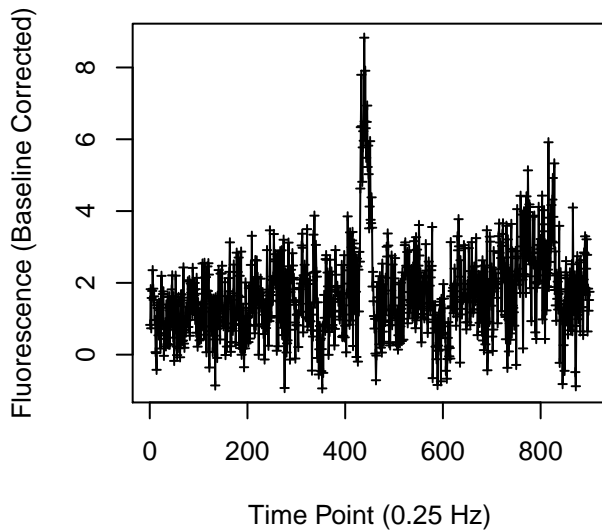

**Cell 471**

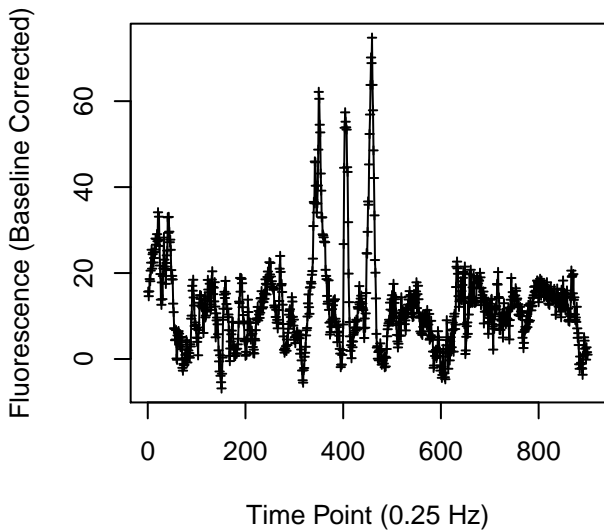

**Cell 472**

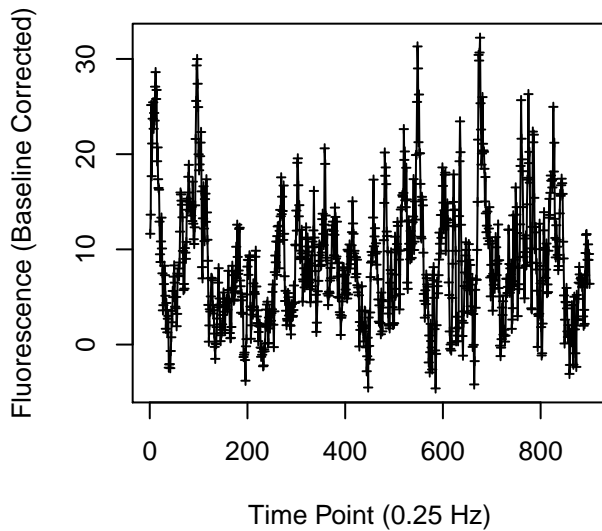

**Cell 473**

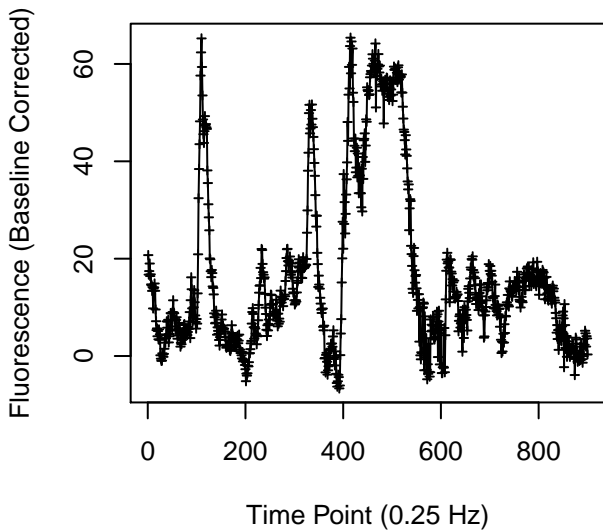

**Cell 474**

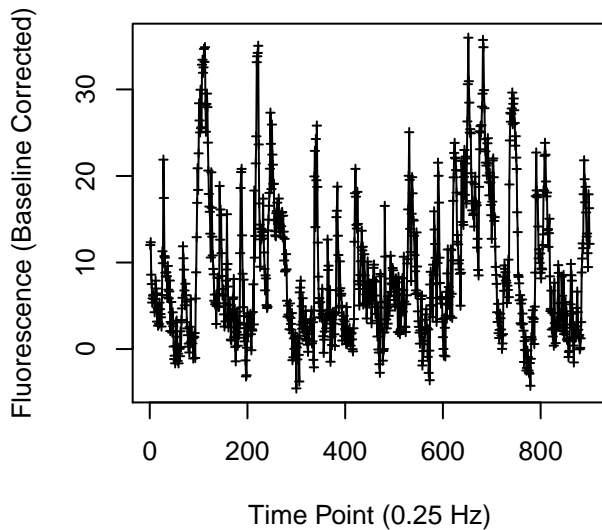

**Cell 475**

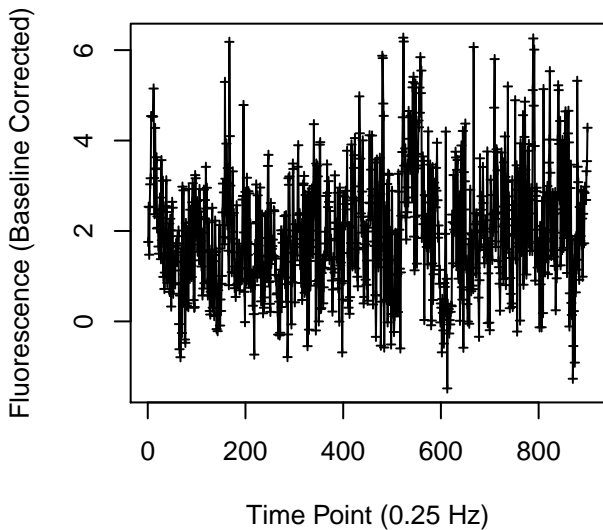

**Cell 476**

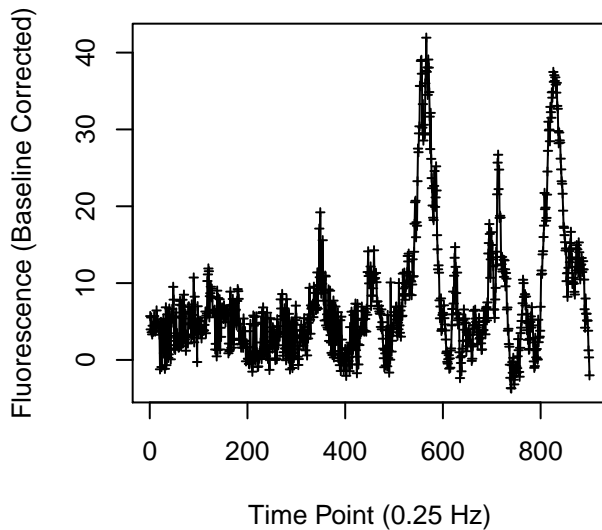

**Cell 477**

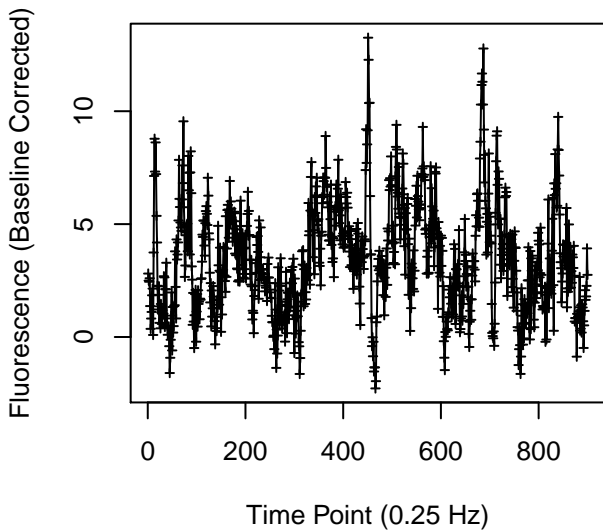

**Cell 478**

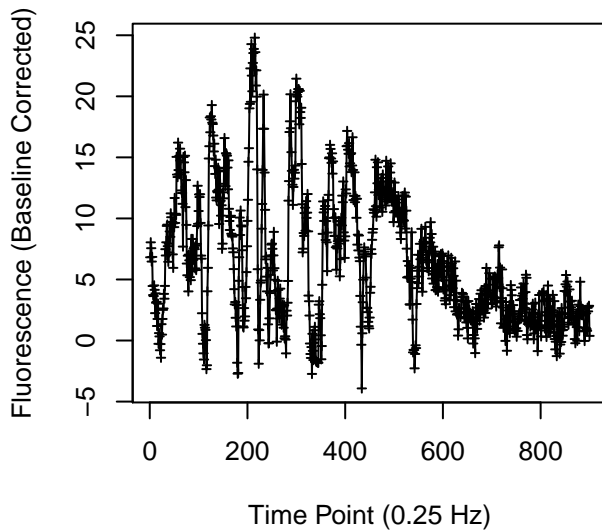

**Cell 479**

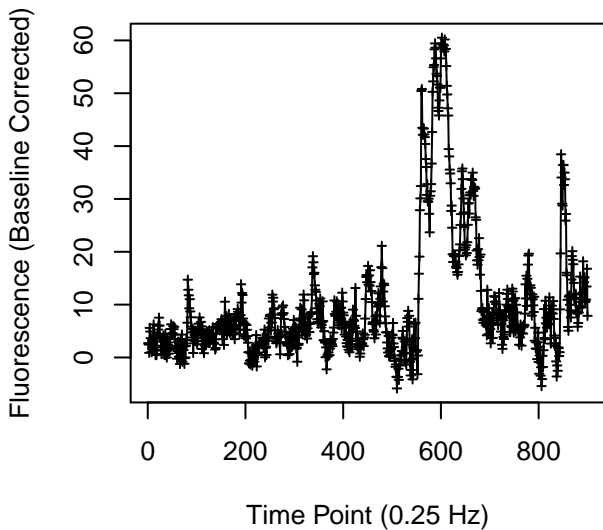

**Cell 480**

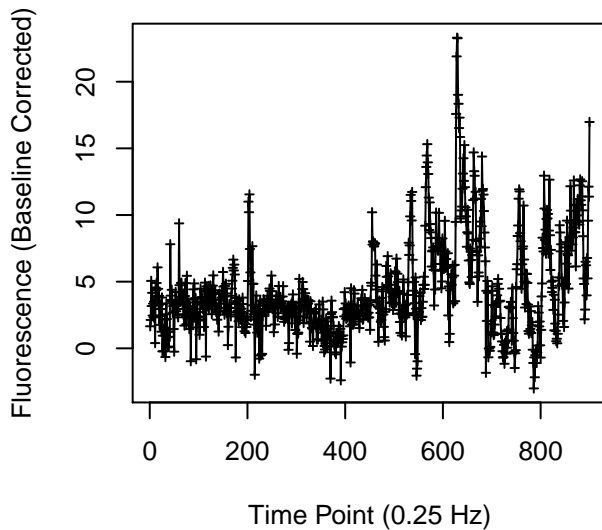

**Cell 481**

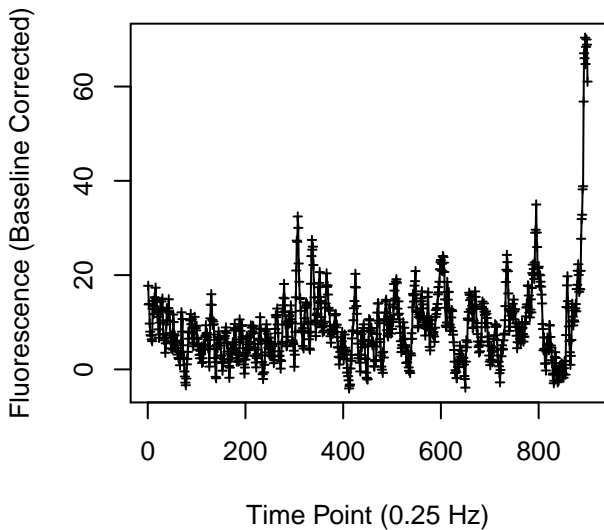

**Cell 482**

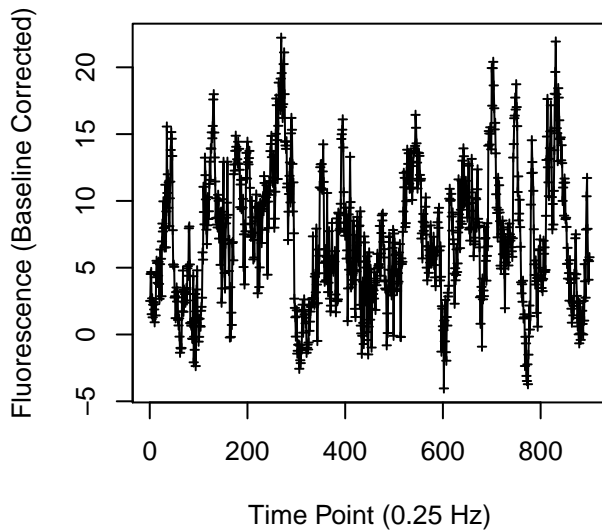

**Cell 483**

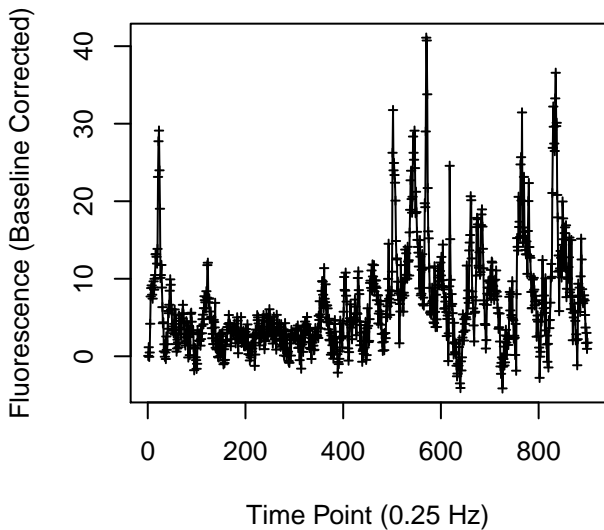

**Cell 484**

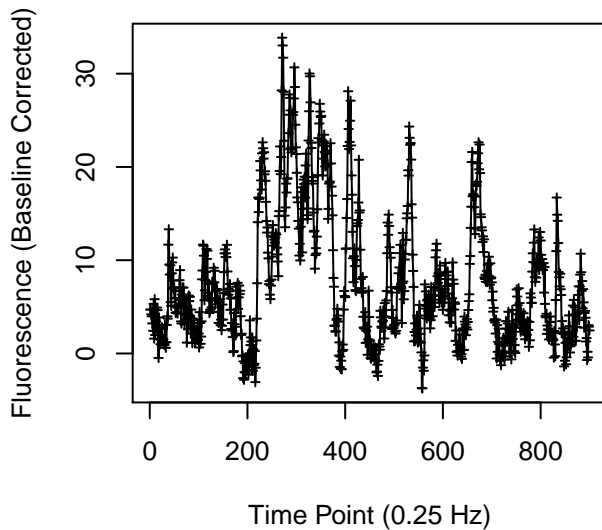

**Cell 485**

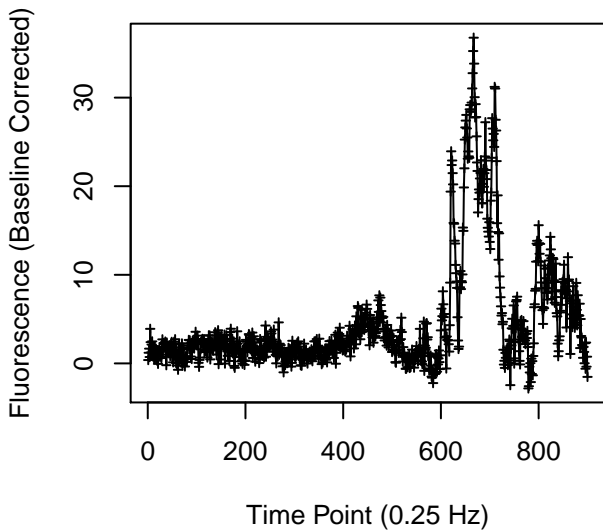

**Cell 486**

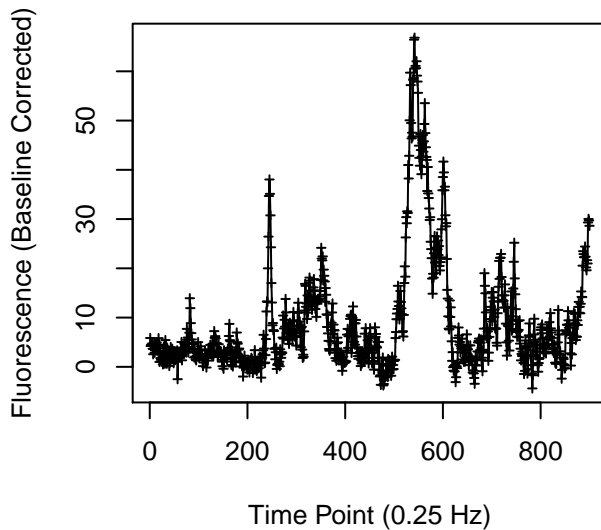

**Cell 487**

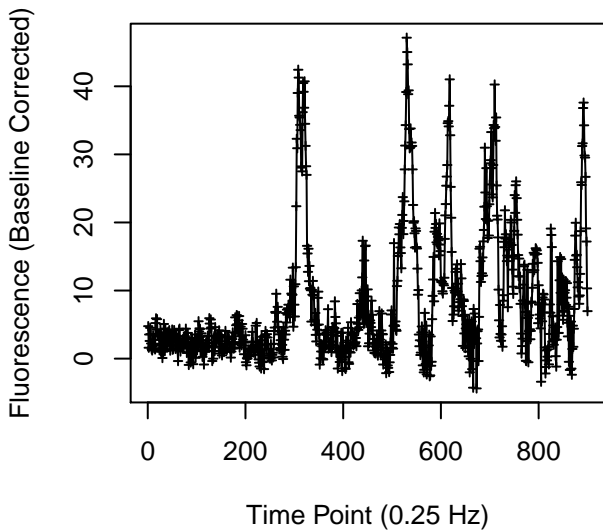

**Cell 488**

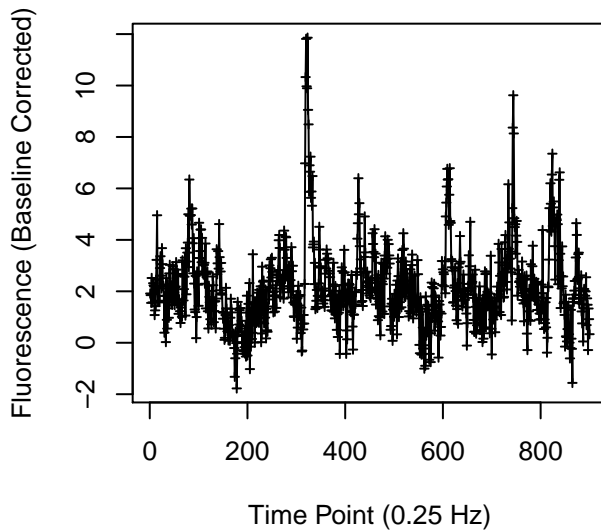

**Cell 489**

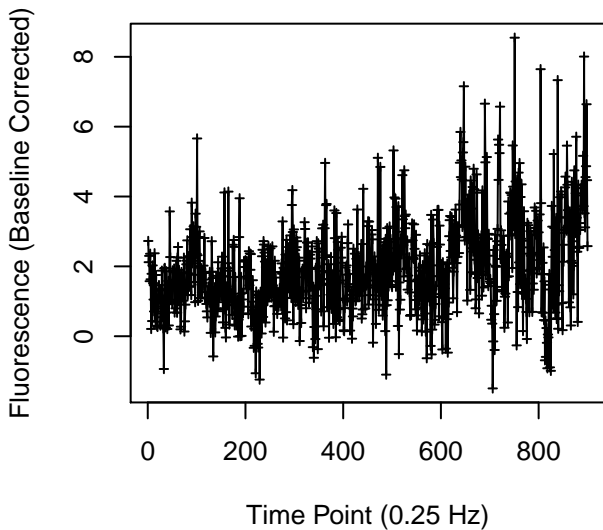

**Cell 490**

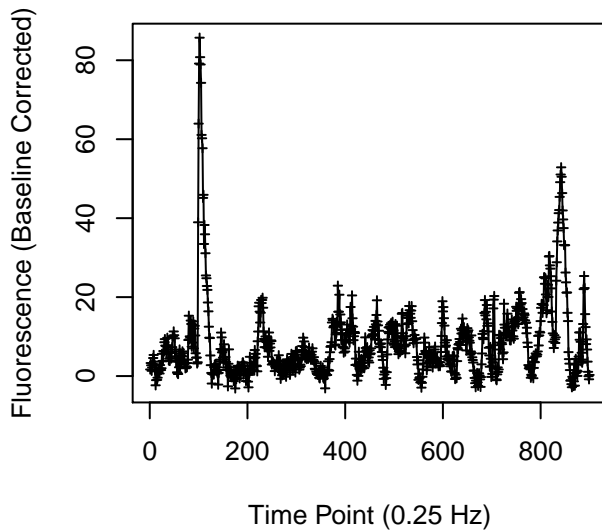

**Cell 491**

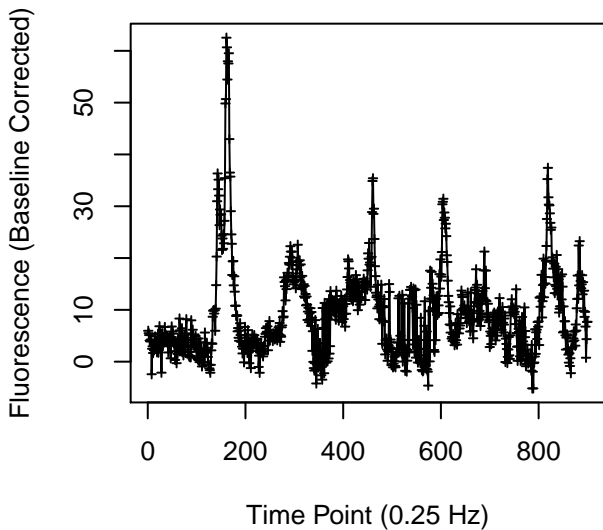

**Cell 492**

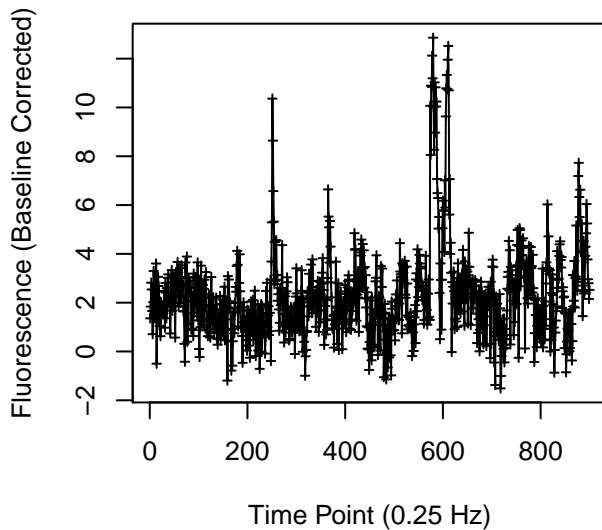

**Cell 493**

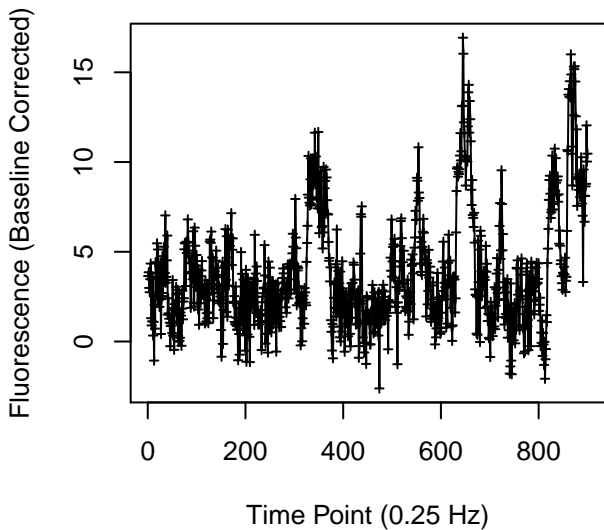

**Cell 494**

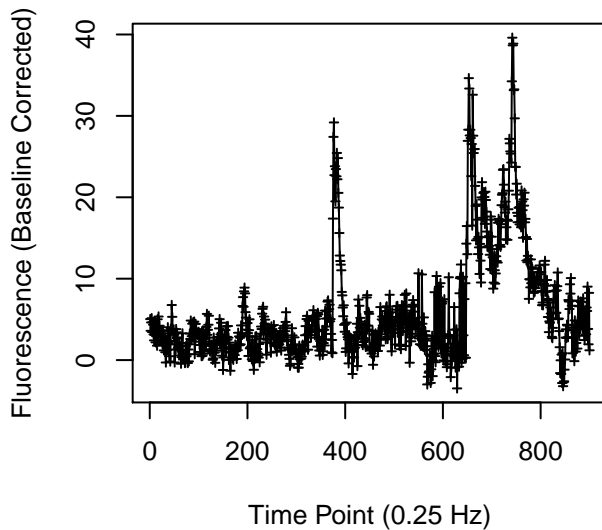

**Cell 495**

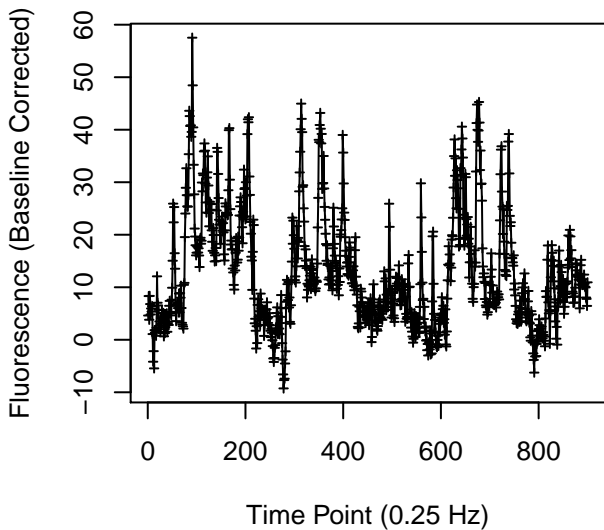

**Cell 496**

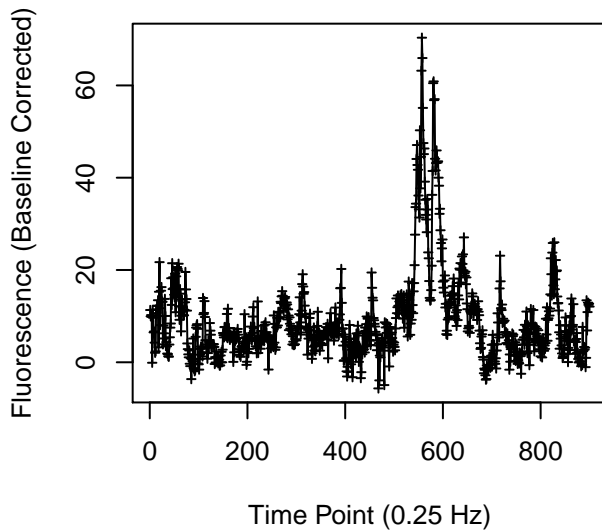

**Cell 497**

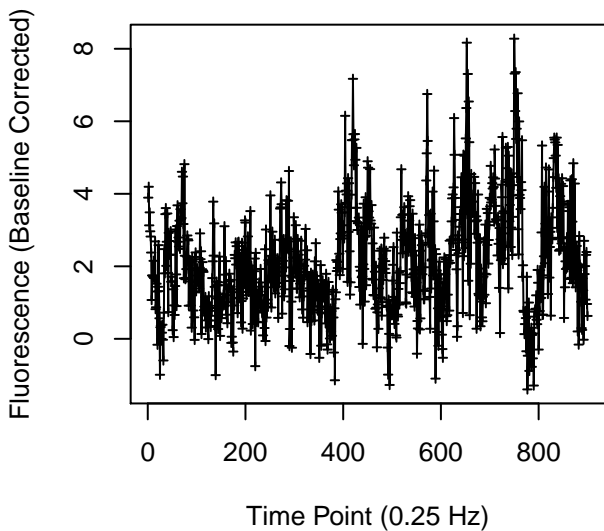

**Cell 498**

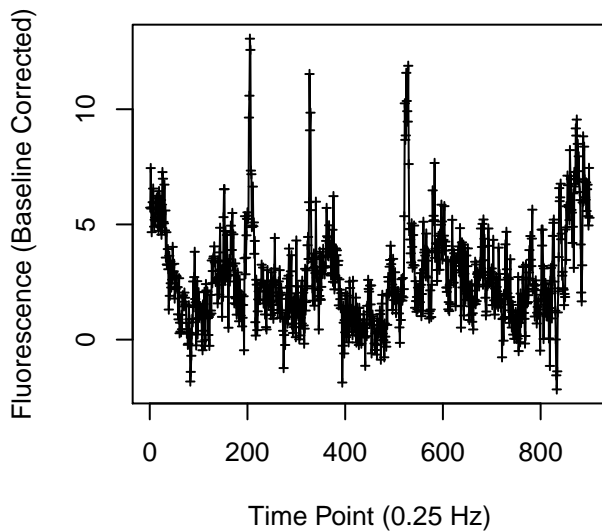

**Cell 499**

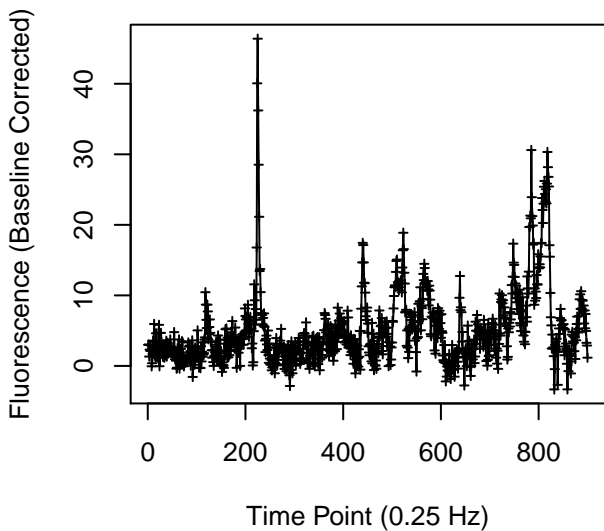

**Cell 500**

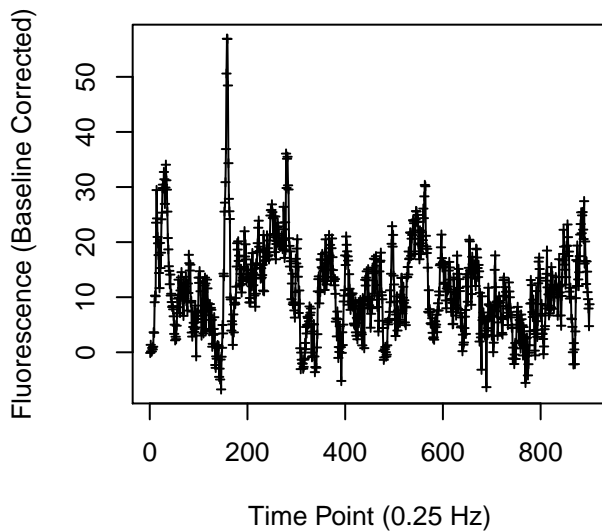

**Cell 501**

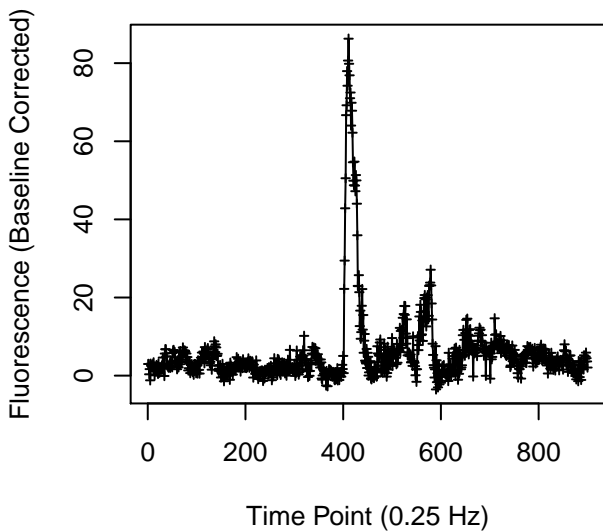

**Cell 502**

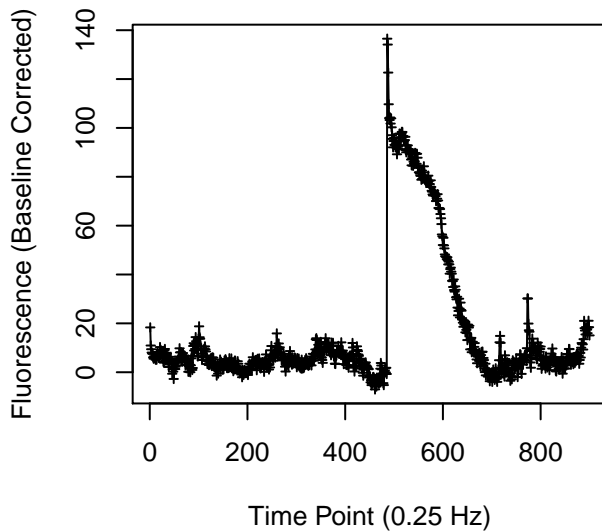

**Cell 503**

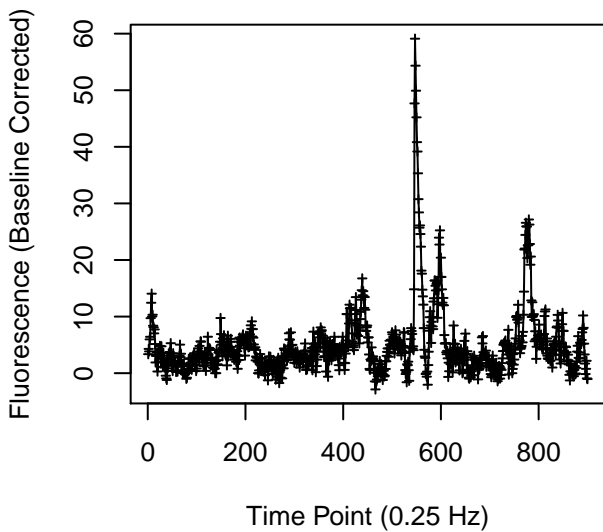

**Cell 504**

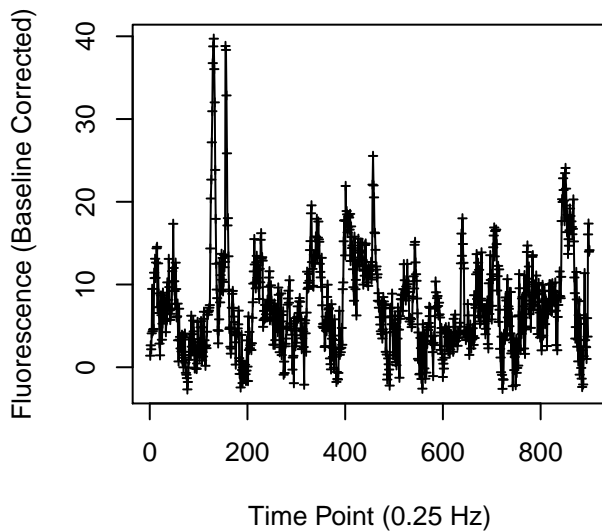

**Cell 505**

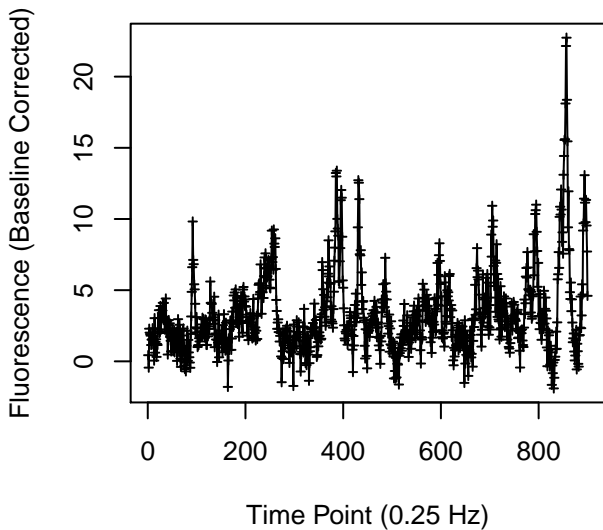

**Cell 506**

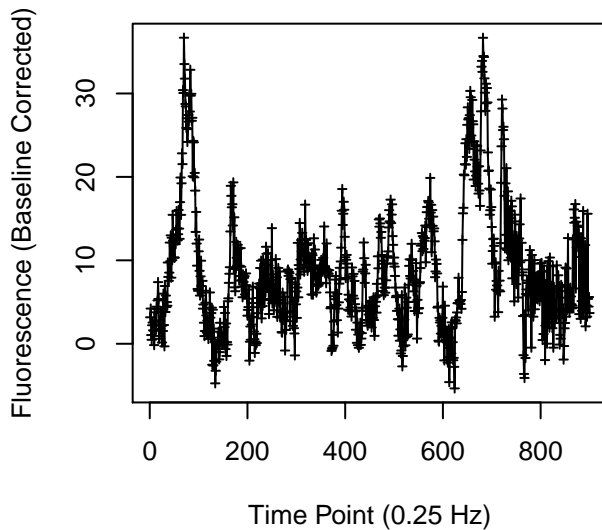

**Cell 507**

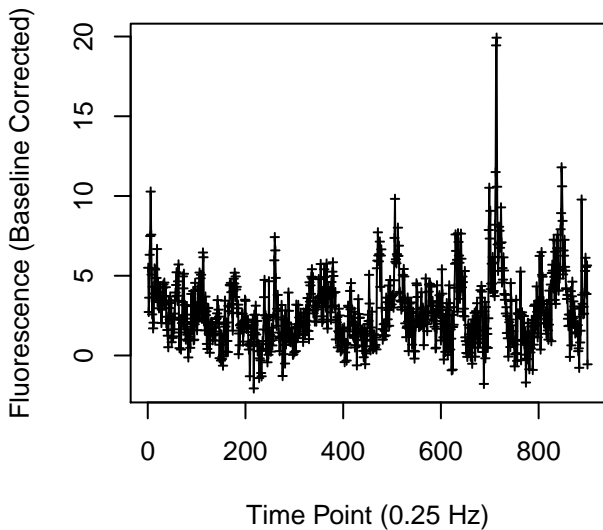

**Cell 508**

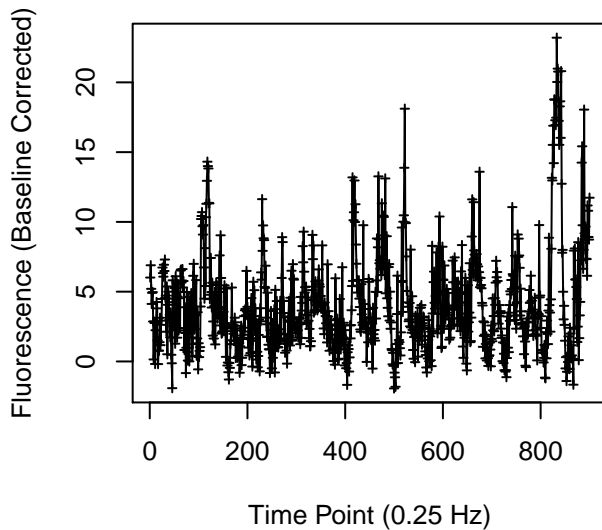

**Cell 509**

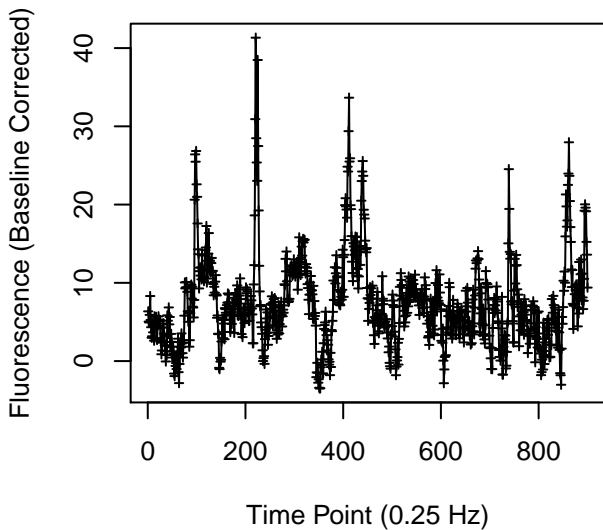

**Cell 510**

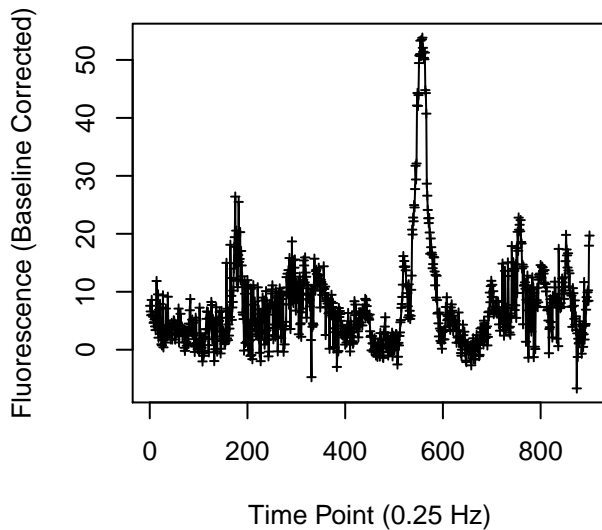

**Cell 511**

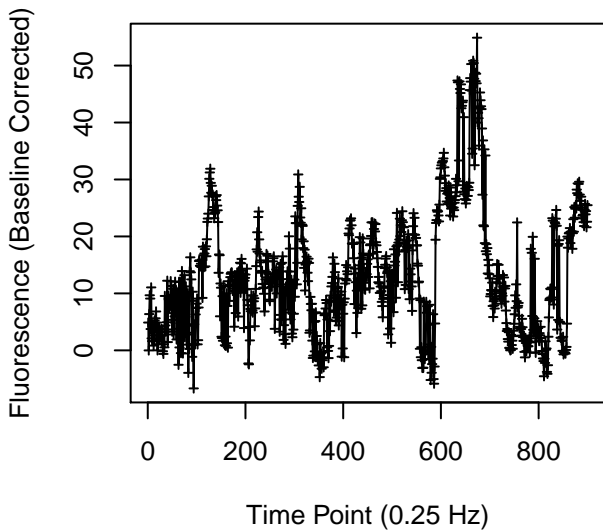

**Cell 512**

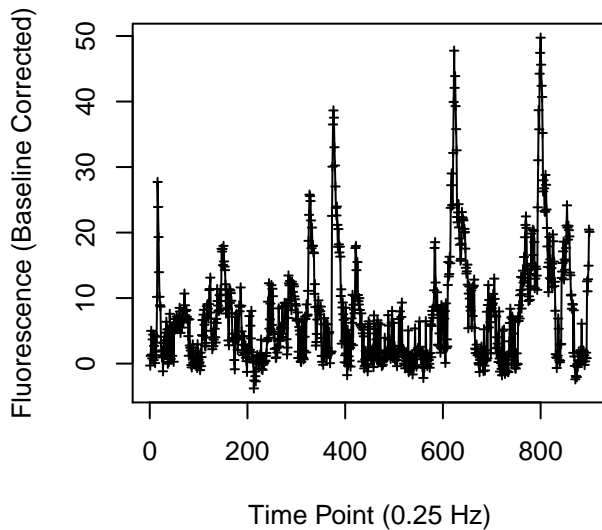

**Cell 513**

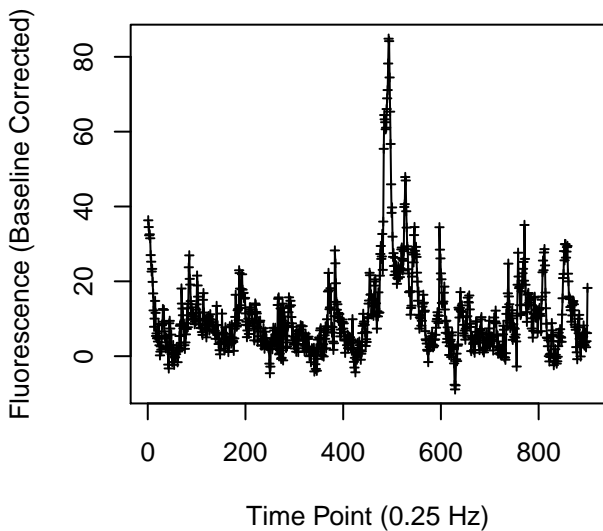

**Cell 514**

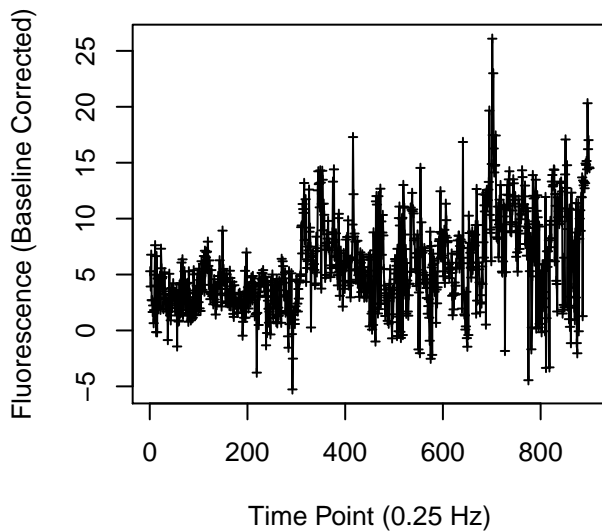

**Cell 515**

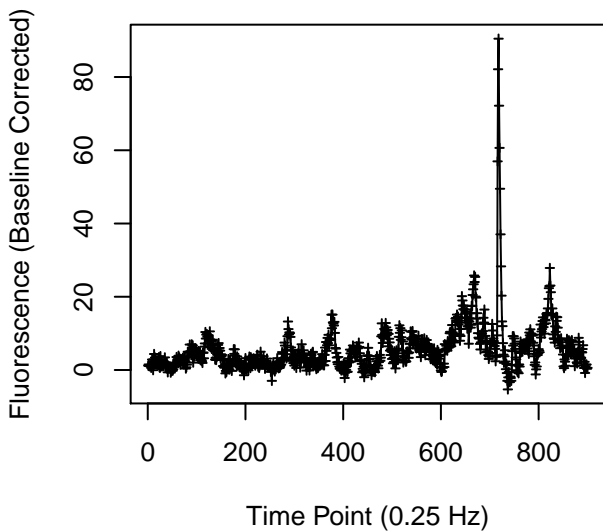

**Cell 516**

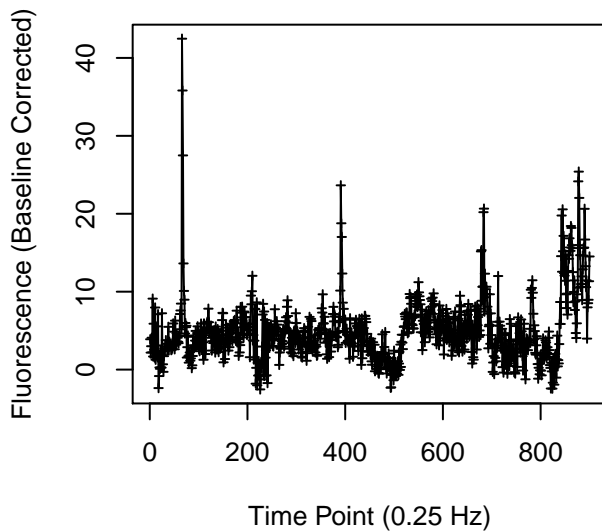

**Cell 517**

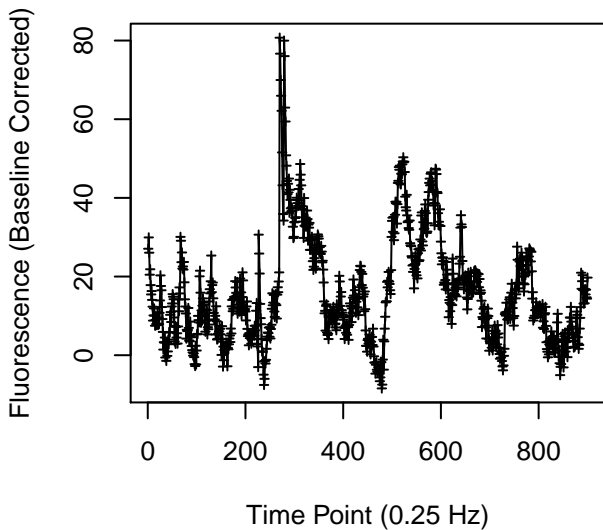

**Cell 518**

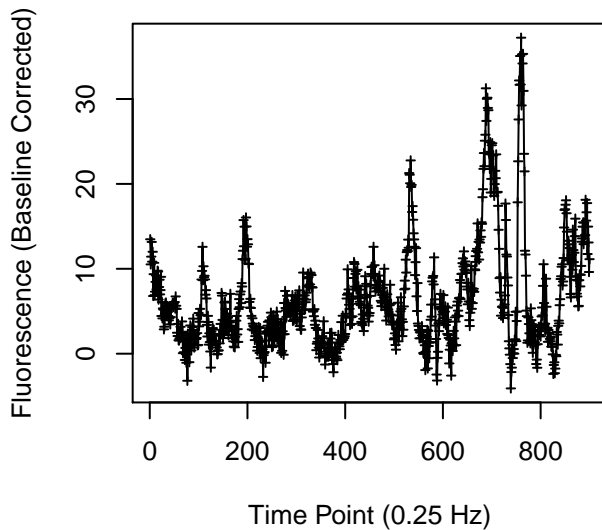

**Cell 519**

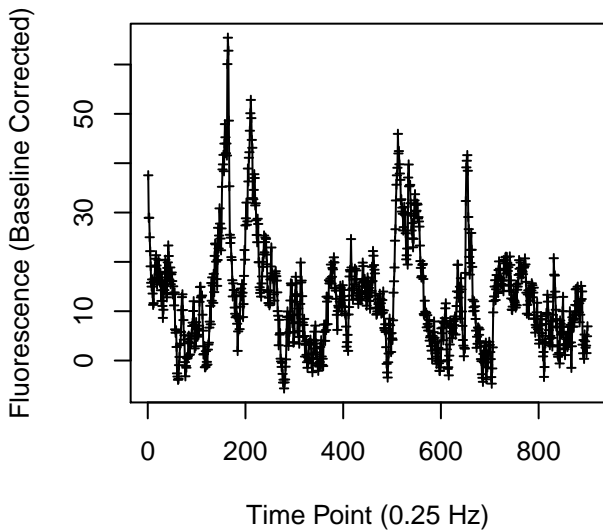

**Cell 520**

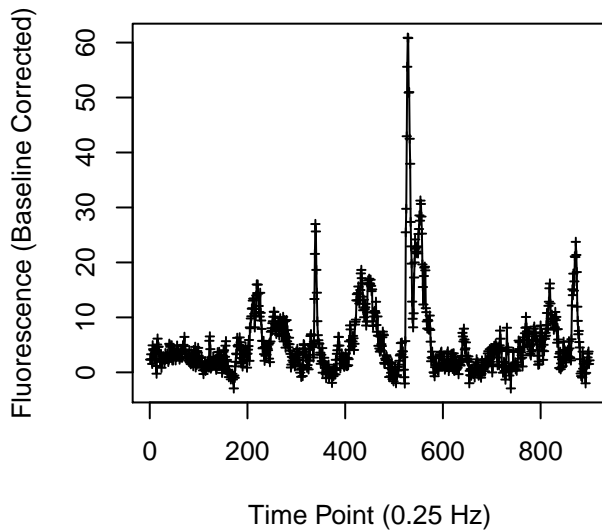

**Cell 521**

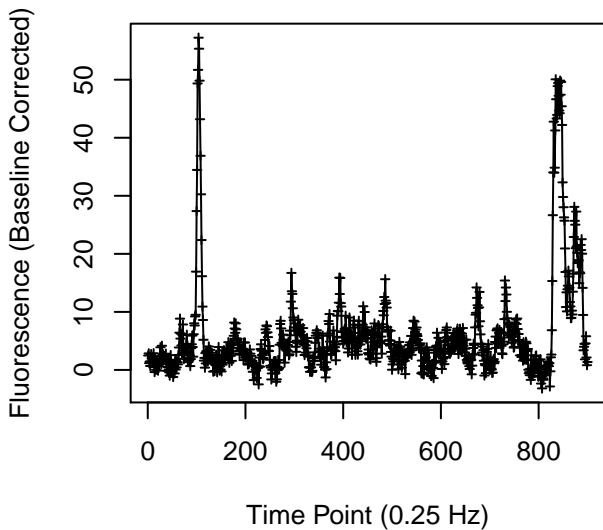

**Cell 522**

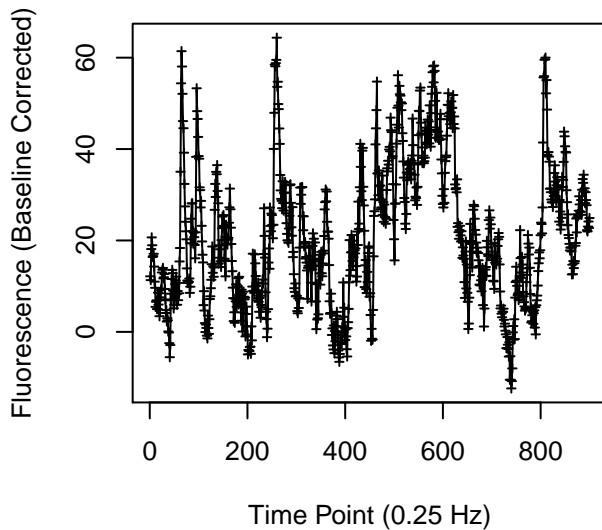

**Cell 523**

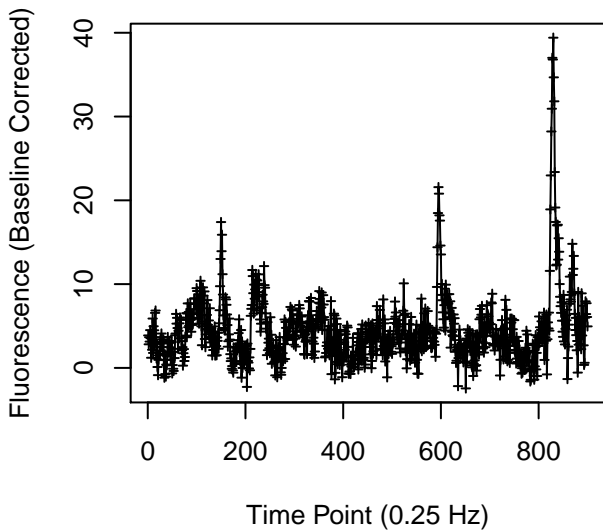

**Cell 524**

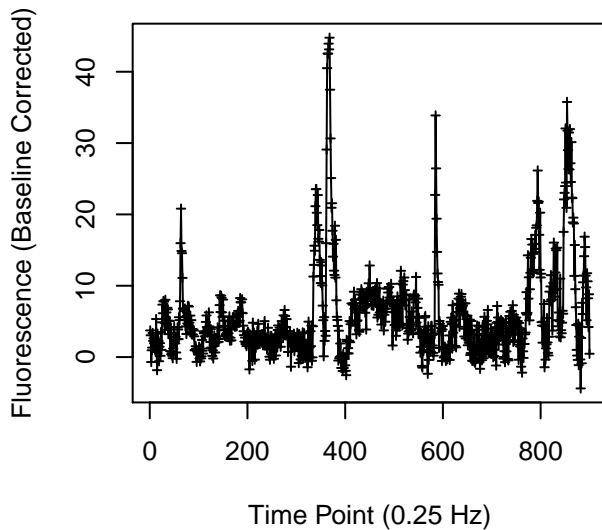

**Cell 525**

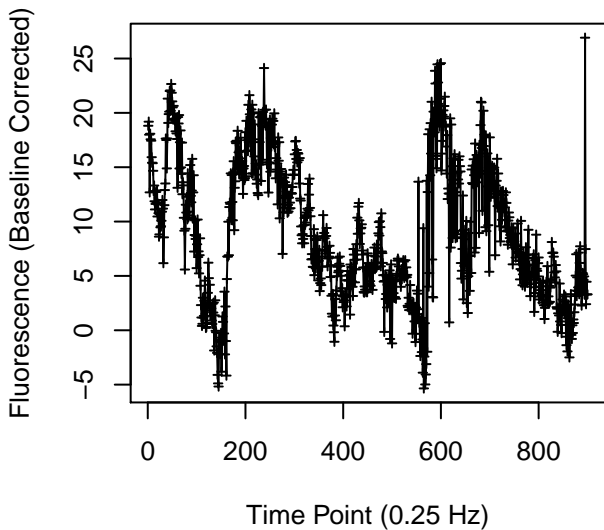

**Cell 526**

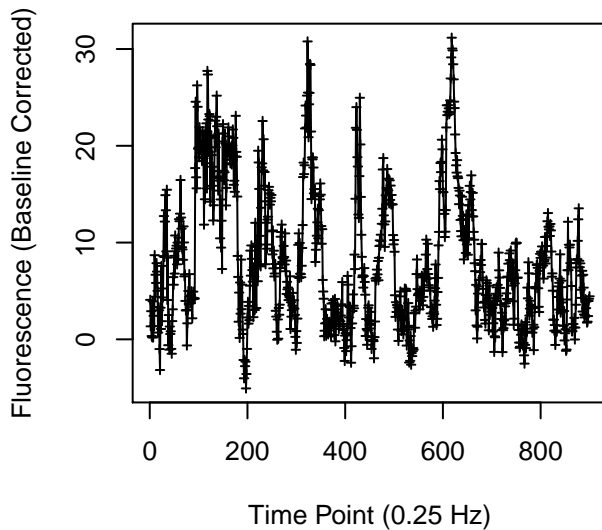

**Cell 527**

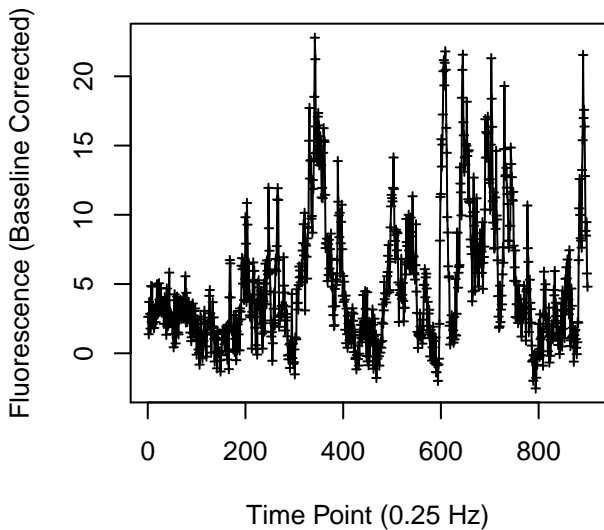

**Cell 528**

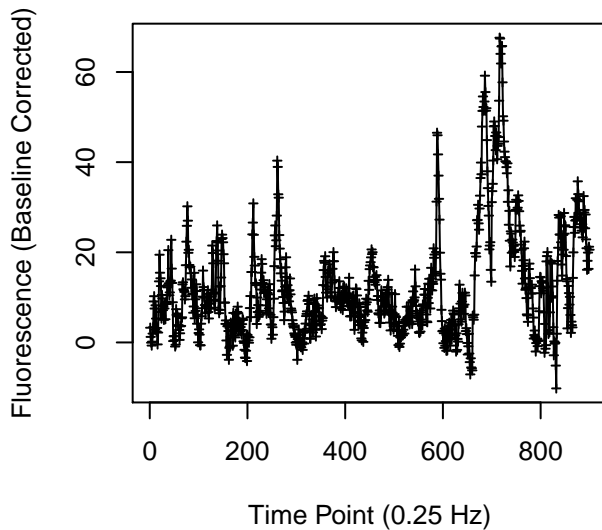

**Cell 529**

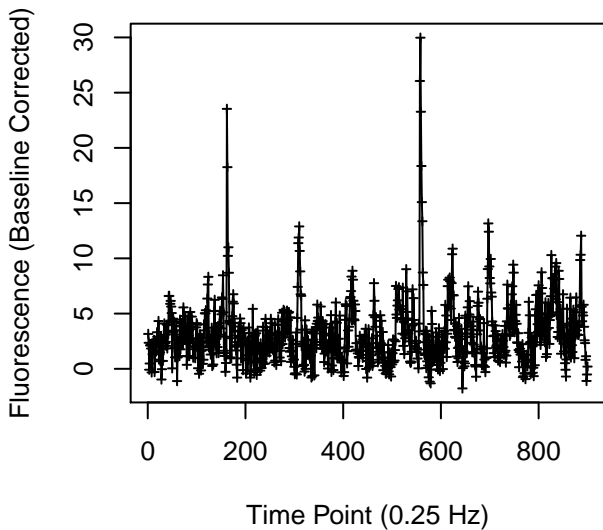

**Cell 530**

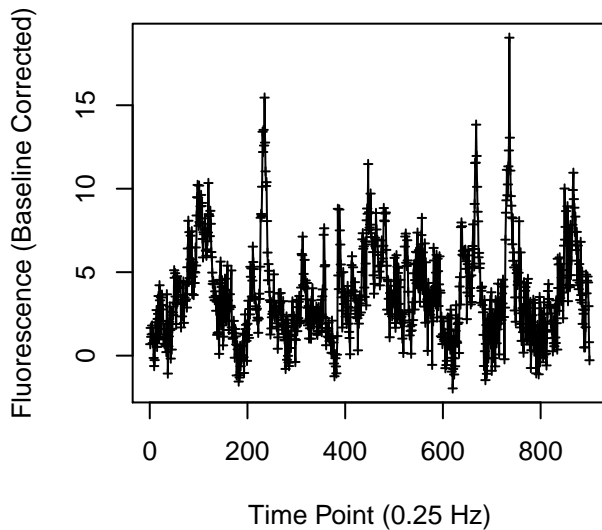

**Cell 531**

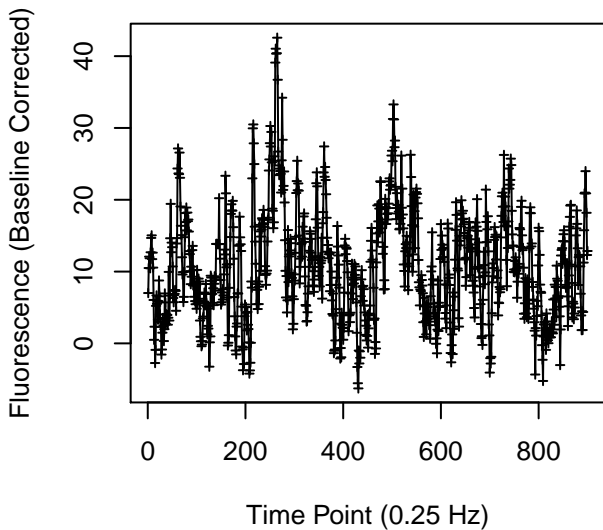

**Cell 532**

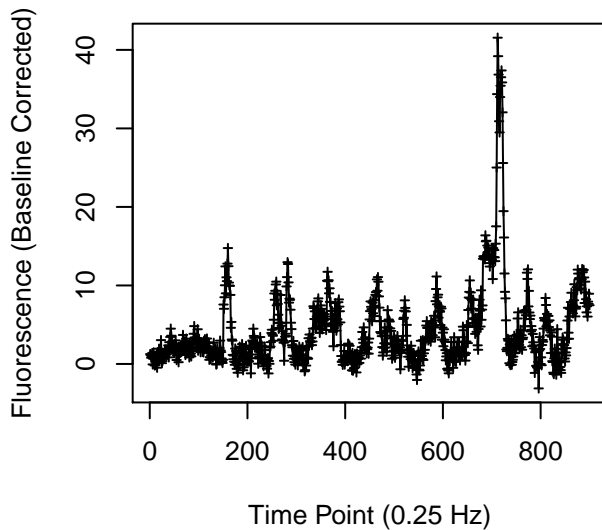

**Cell 533**

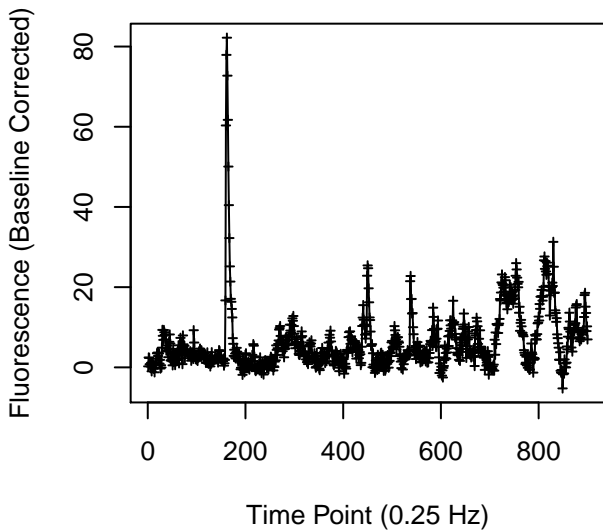

**Cell 534**

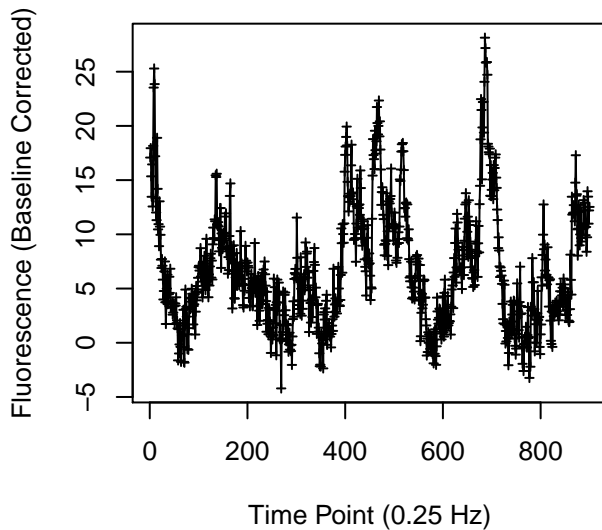

**Cell 535**

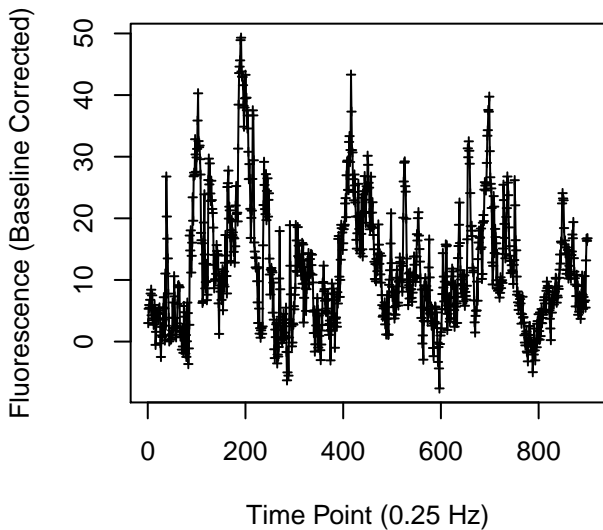

**Cell 536**

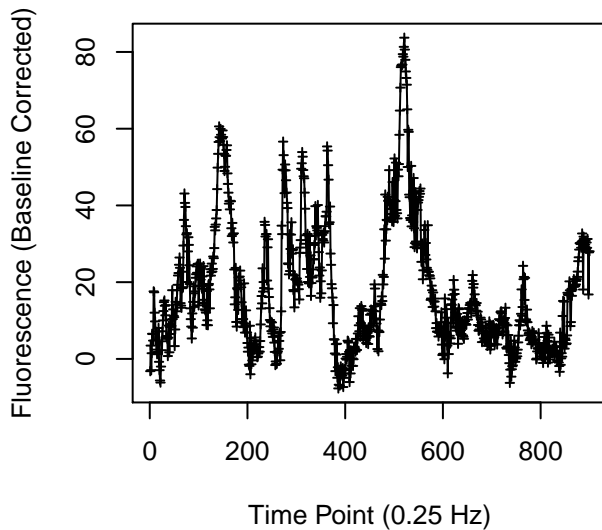

**Cell 537**

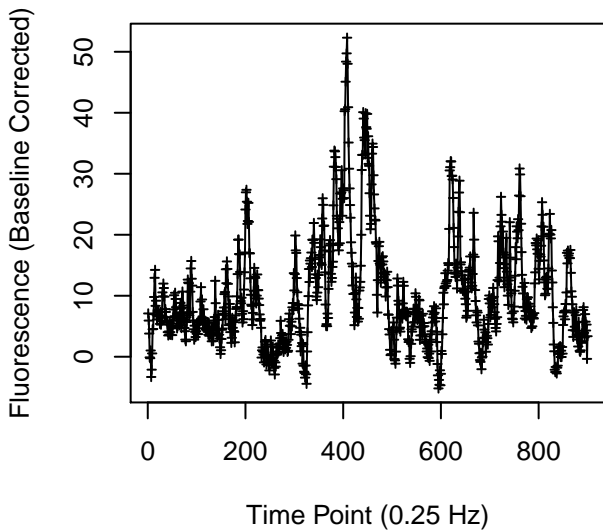

**Cell 538**

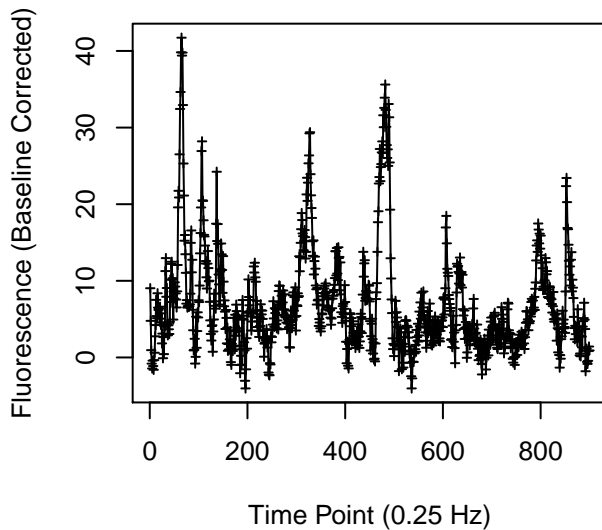

**Cell 539**

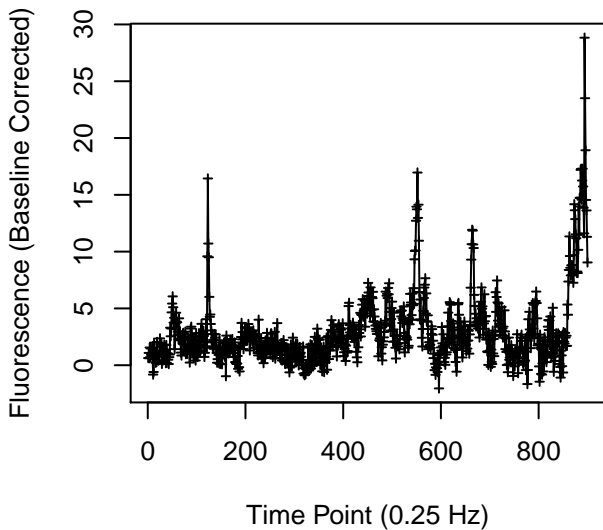

**Cell 540**

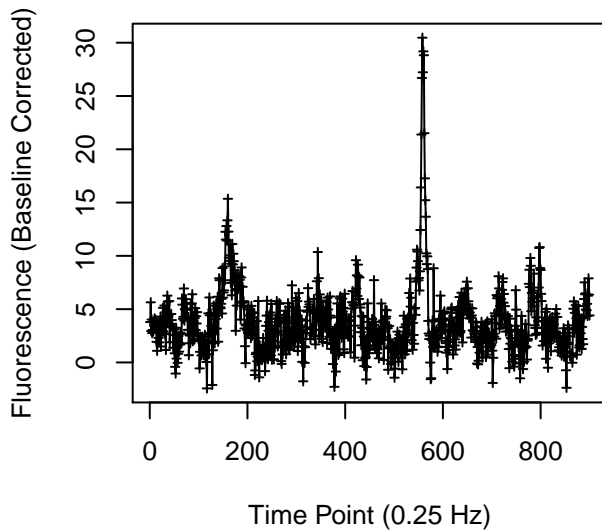

**Cell 541**

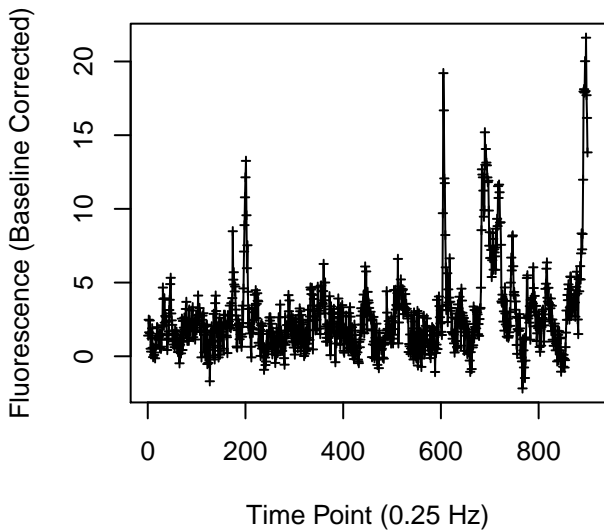

**Cell 542**

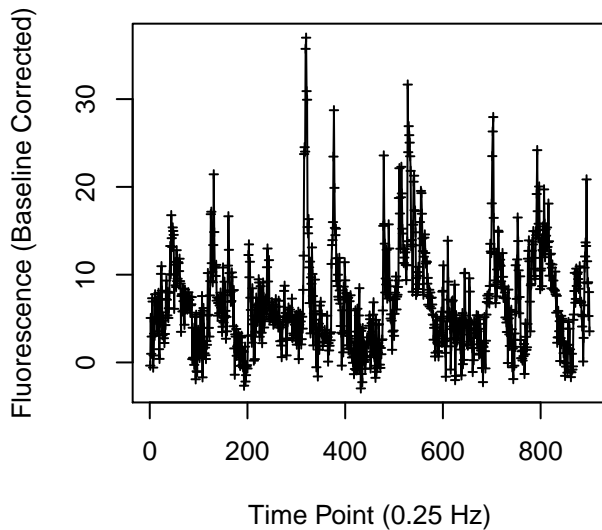

**Cell 543**

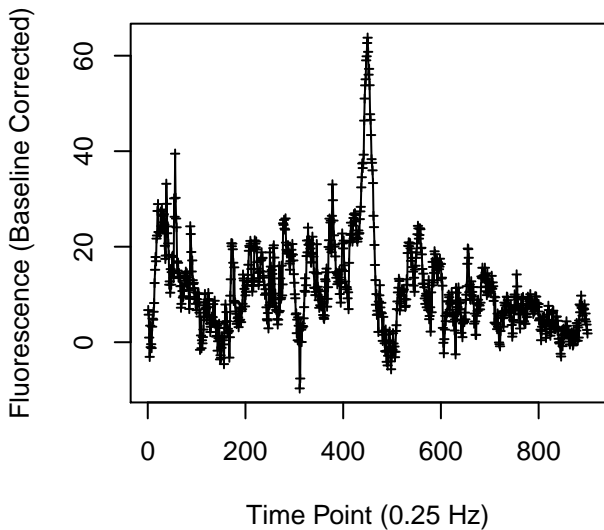

**Cell 544**

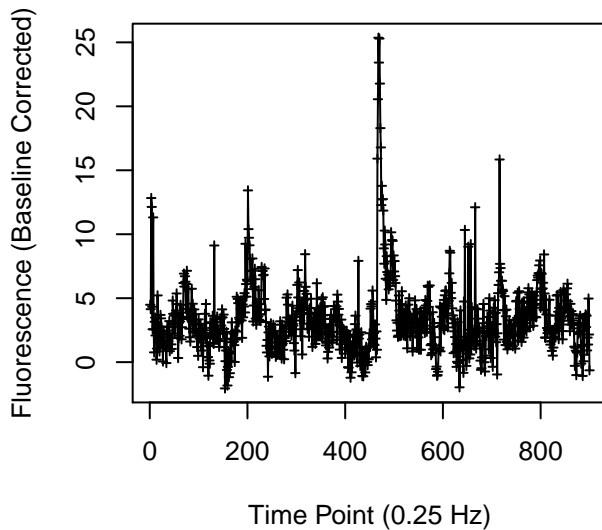

**Cell 545**

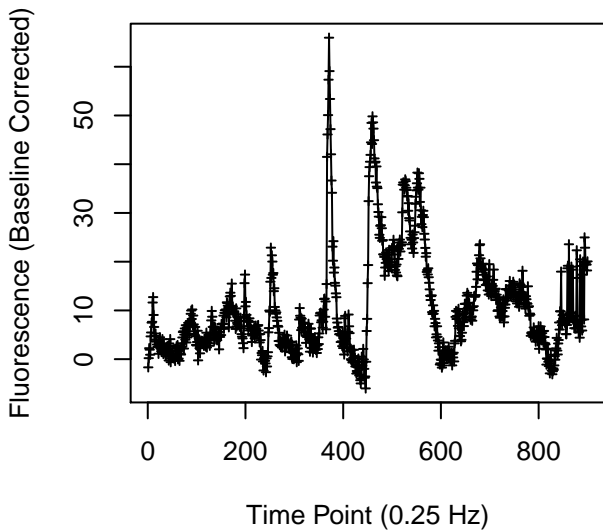

**Cell 546**

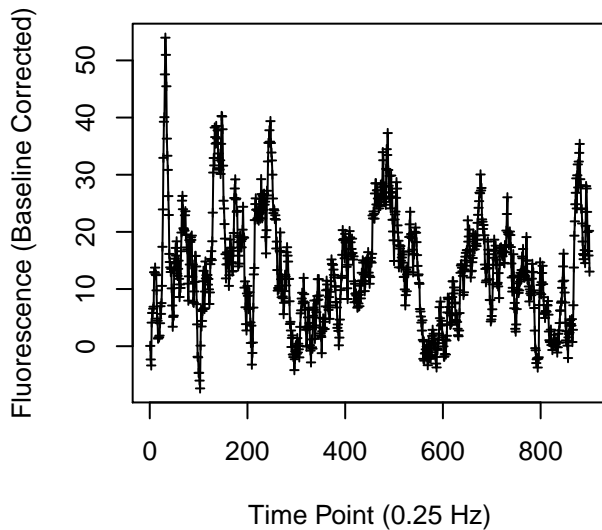

**Cell 547**

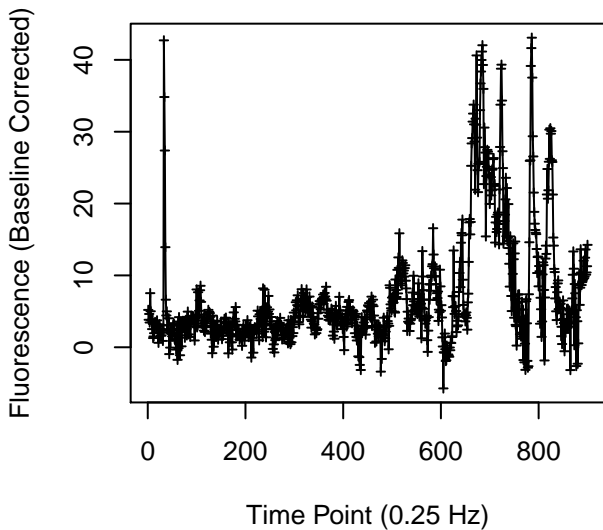

**Cell 548**

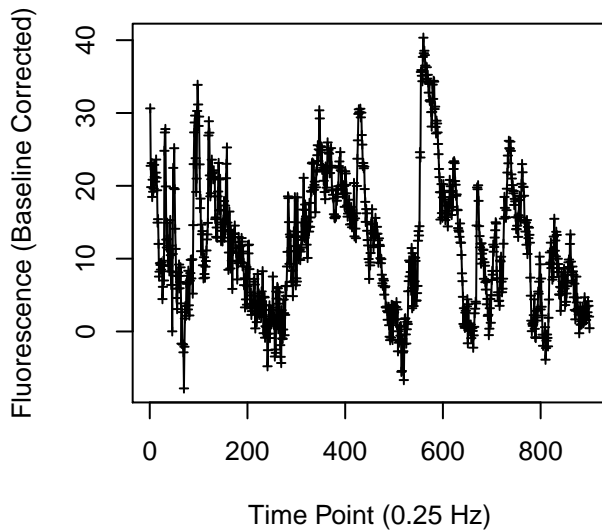

**Cell 549**

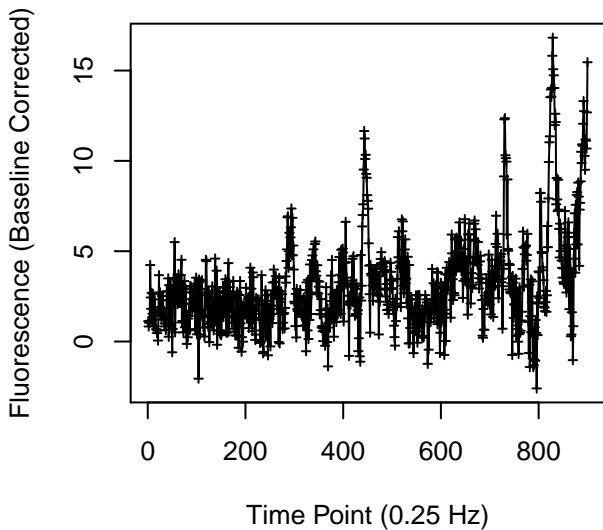

**Cell 550**

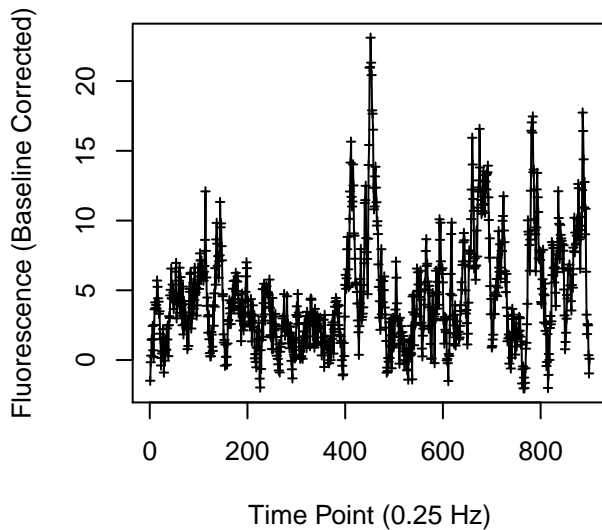

**Cell 551**

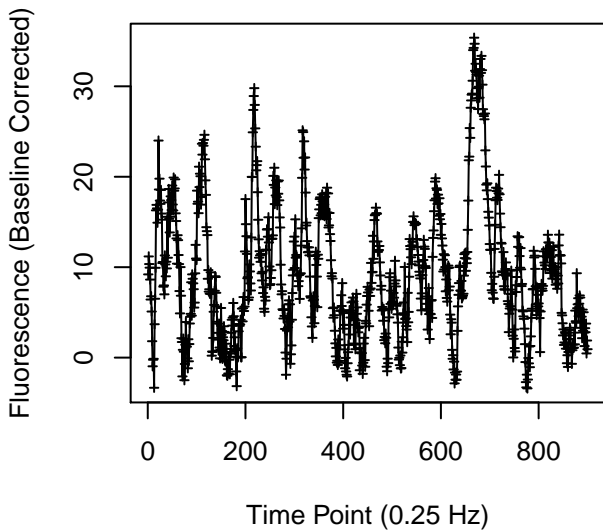

**Cell 552**

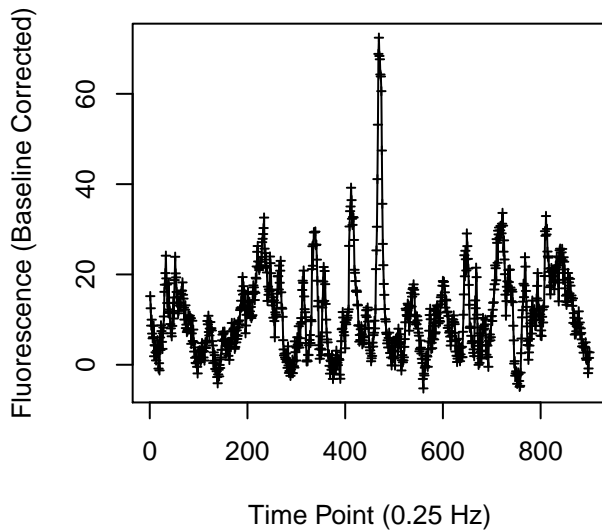

**Cell 553**

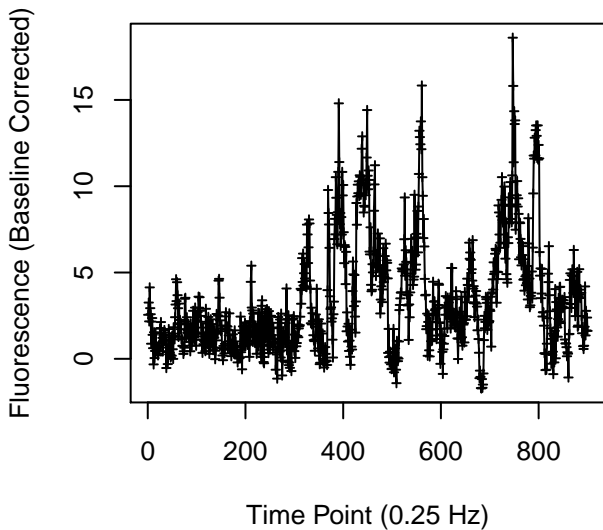

**Cell 554**

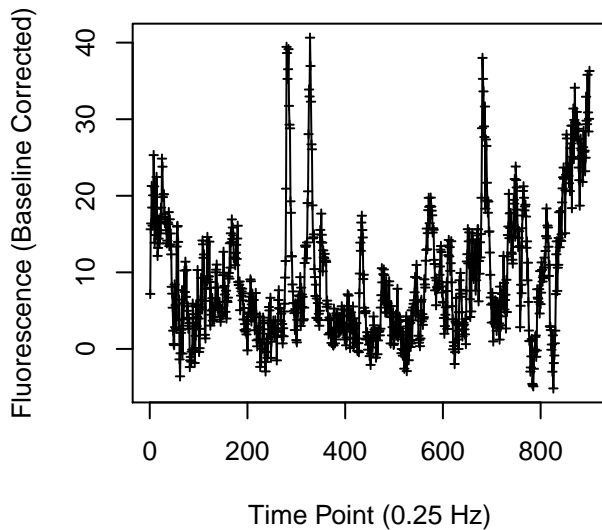

**Cell 555**

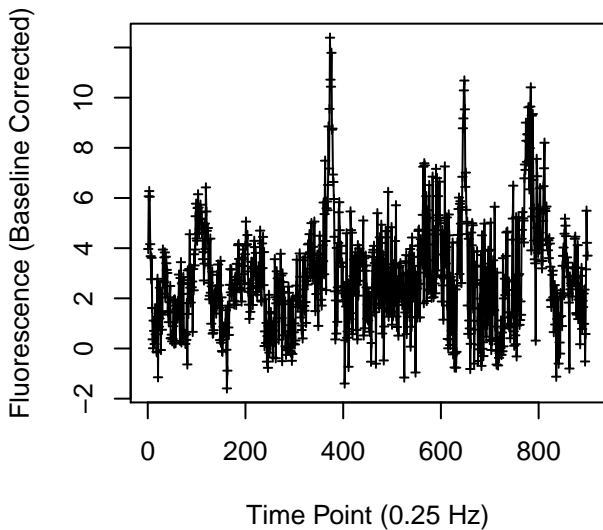

**Cell 556**

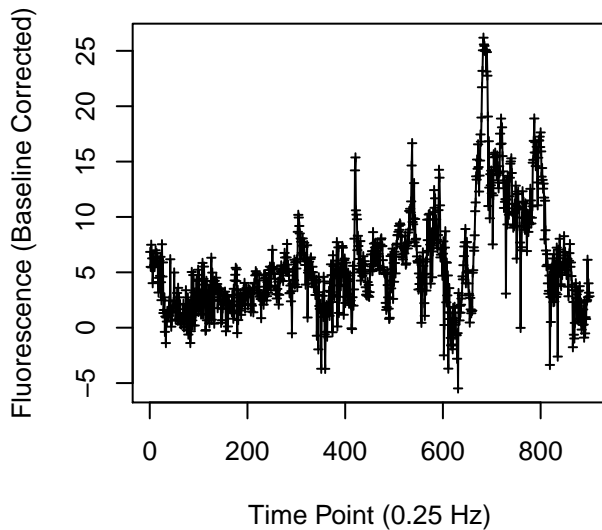

**Cell 557**

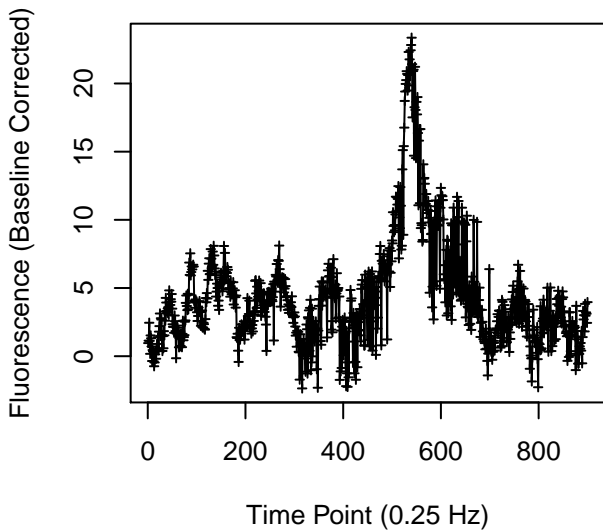

**Cell 558**

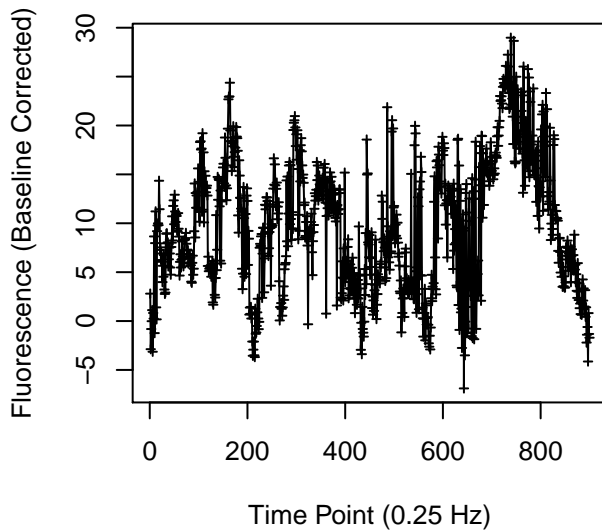

**Cell 559**

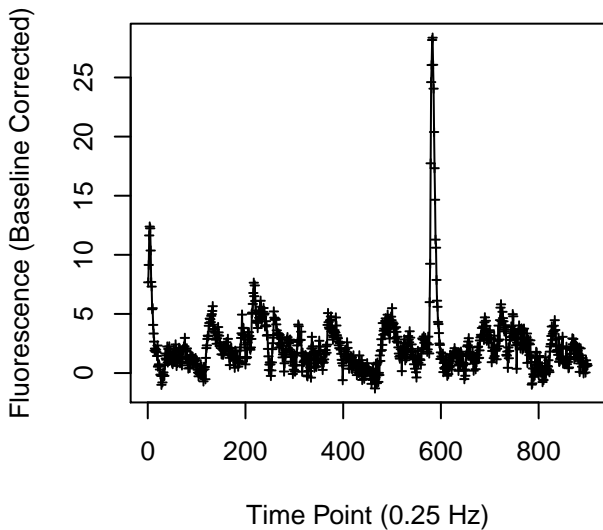

**Cell 560**

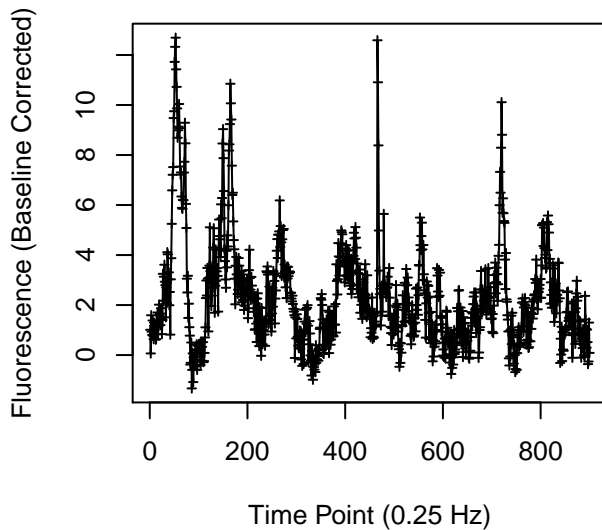

**Cell 561**

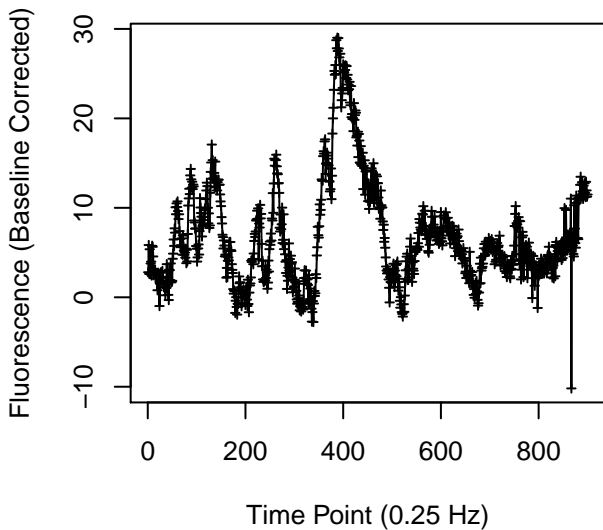

**Cell 562**

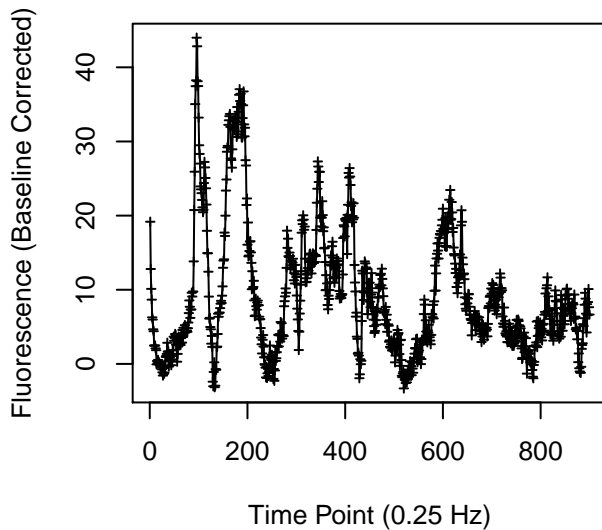

**Cell 563**

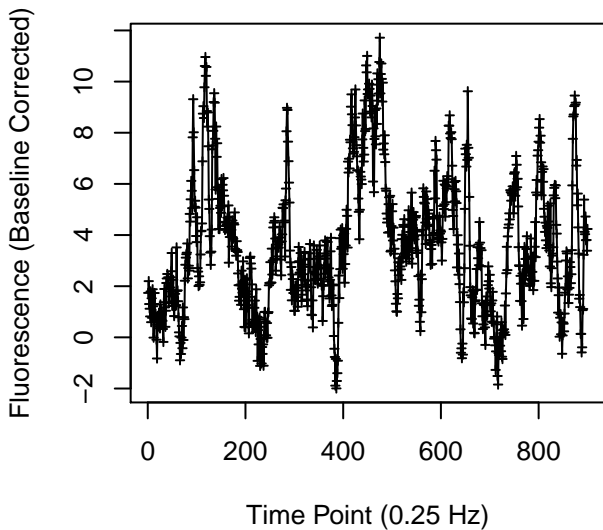

**Cell 564**

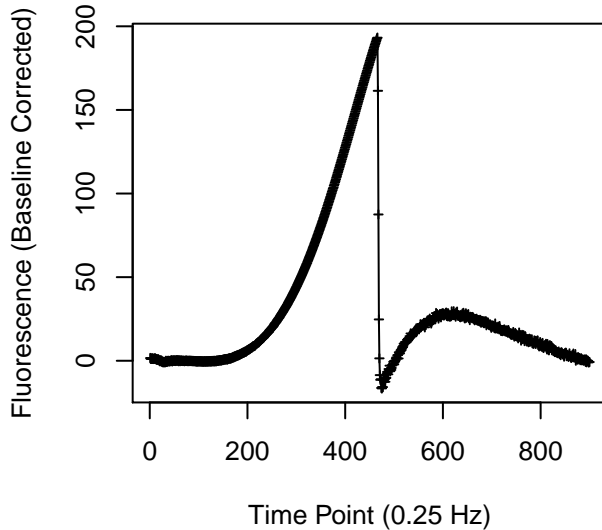

**Cell 565**

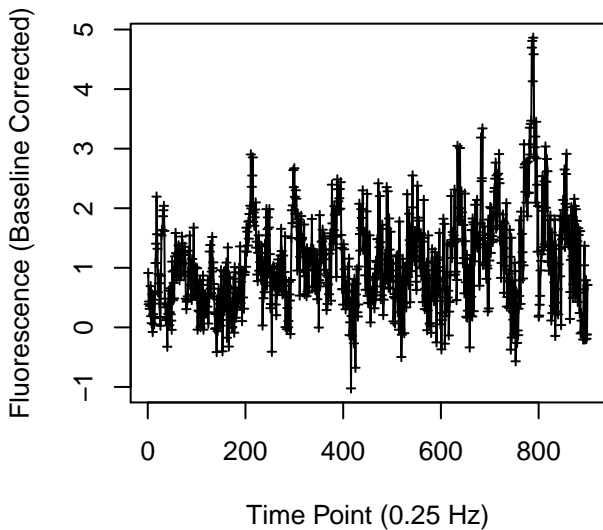

**Cell 566**

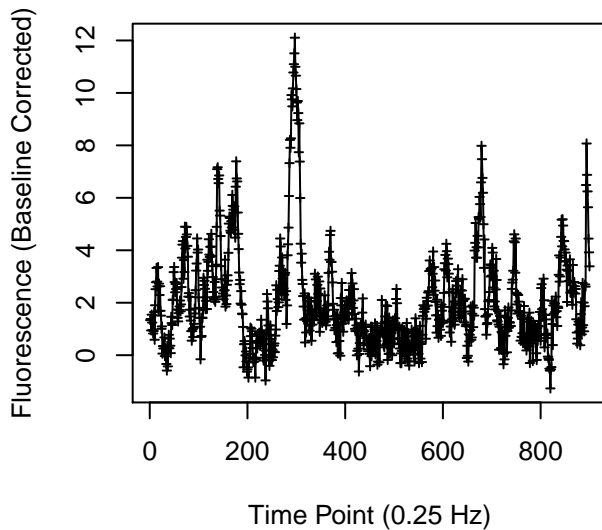

**Cell 567**

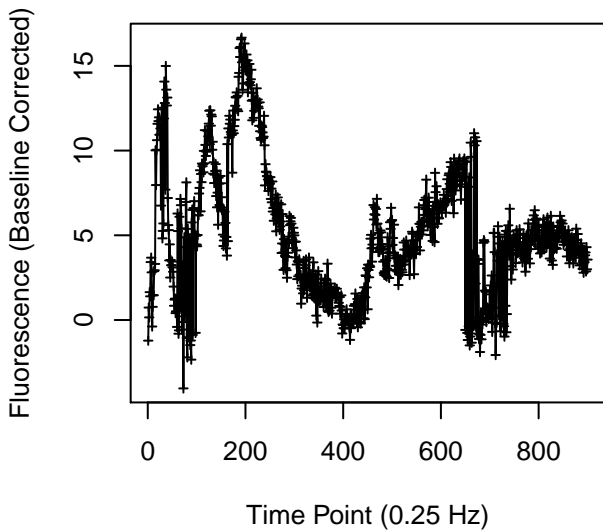

**Cell 568**

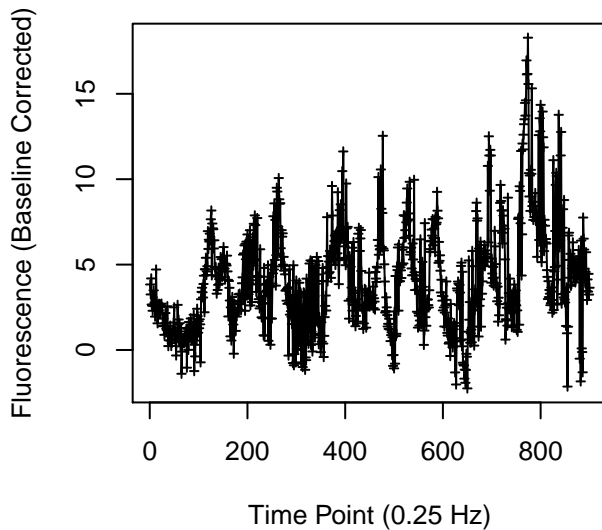

**Cell 569**

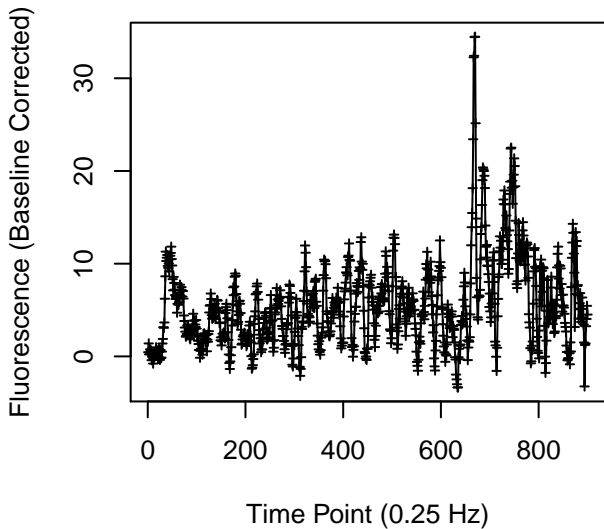

**Cell 570**

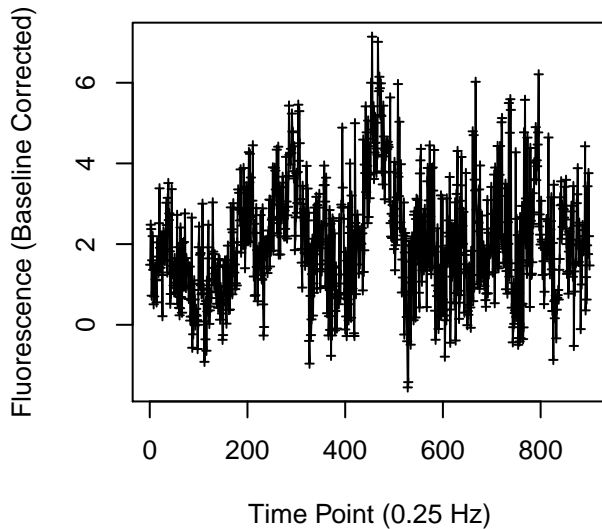

**Cell 571**

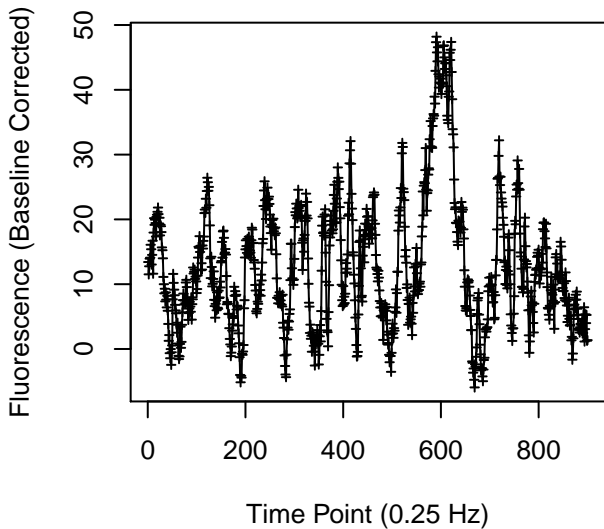

**Cell 572**

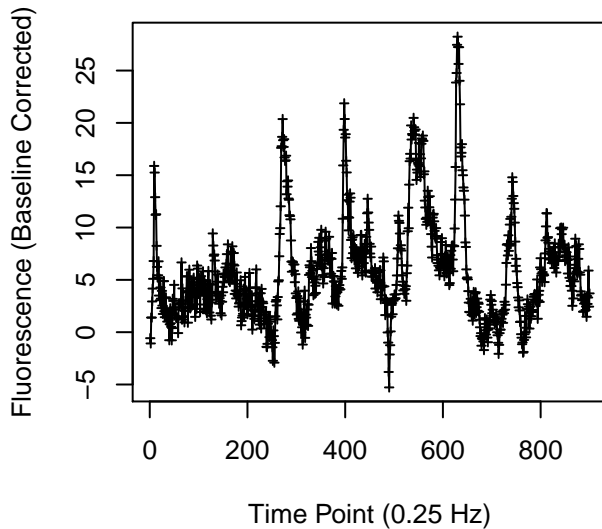

**Cell 573**

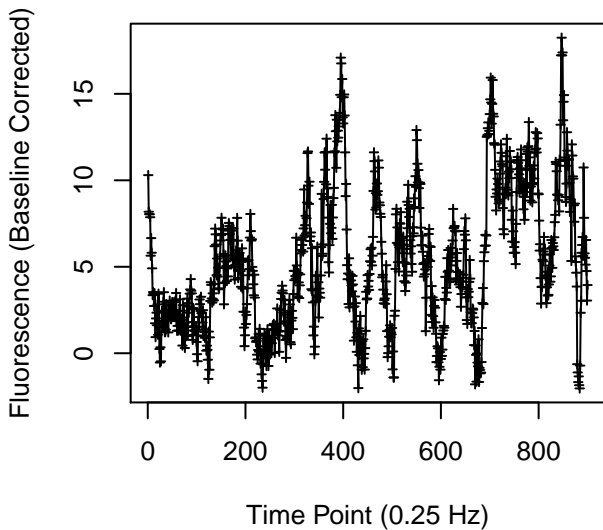

**Cell 574**

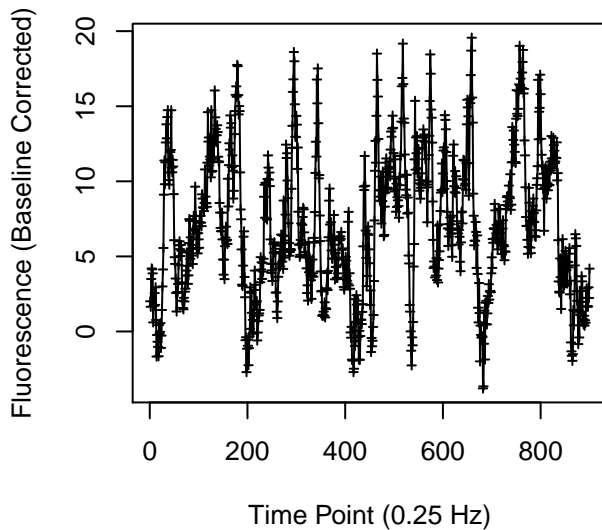

**Cell 575**

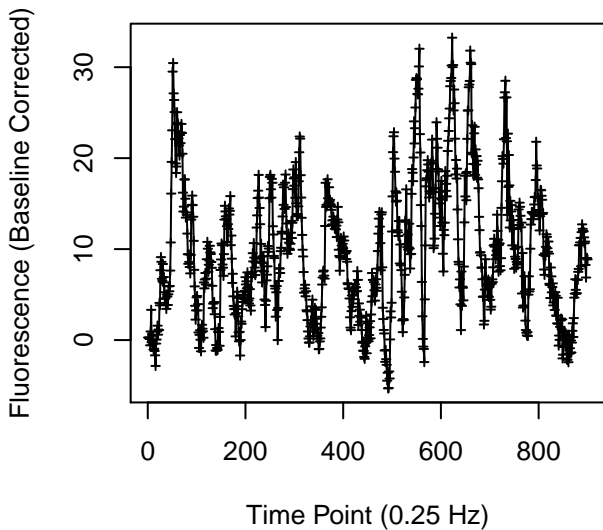

**Cell 576**

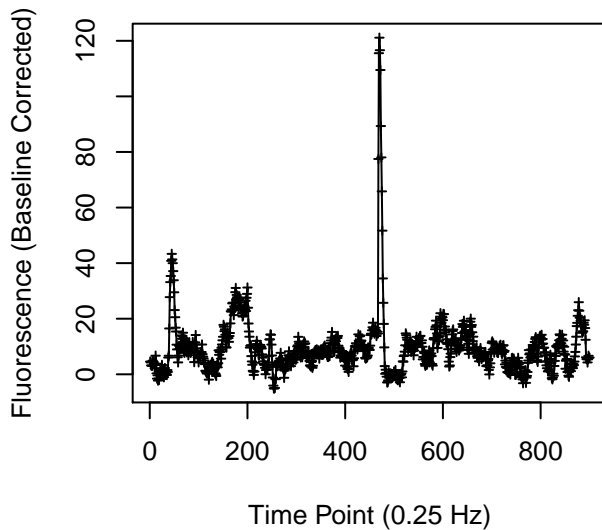

**Cell 577**

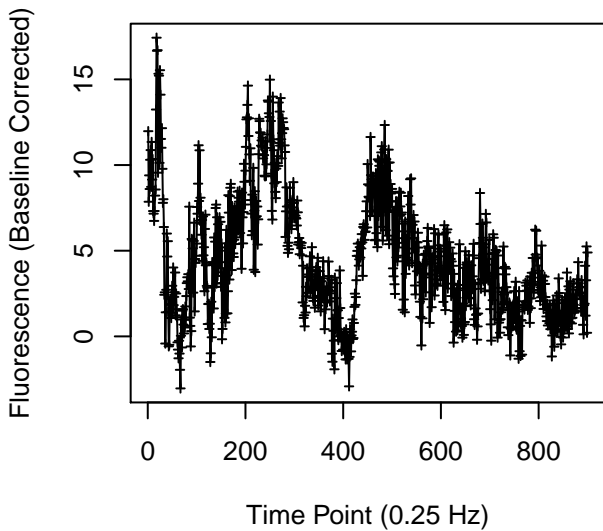

**Cell 578**

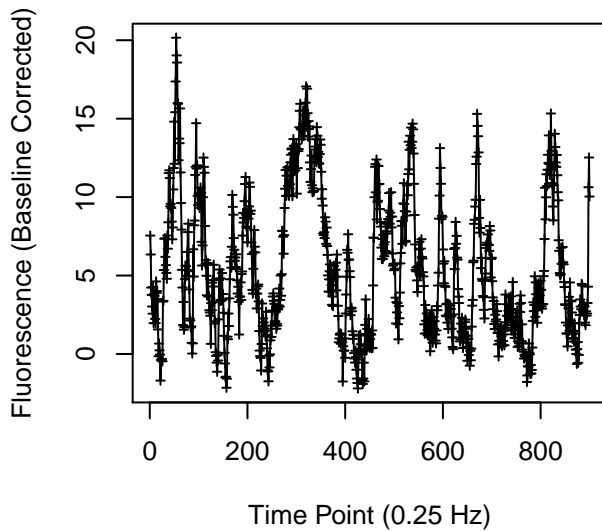

**Cell 579**

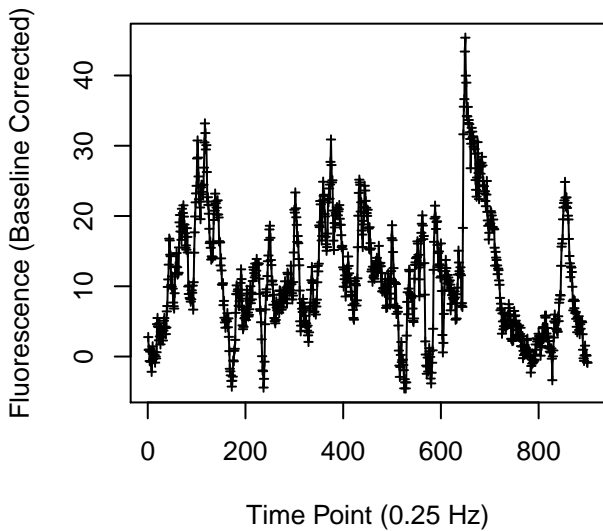

**Cell 580**

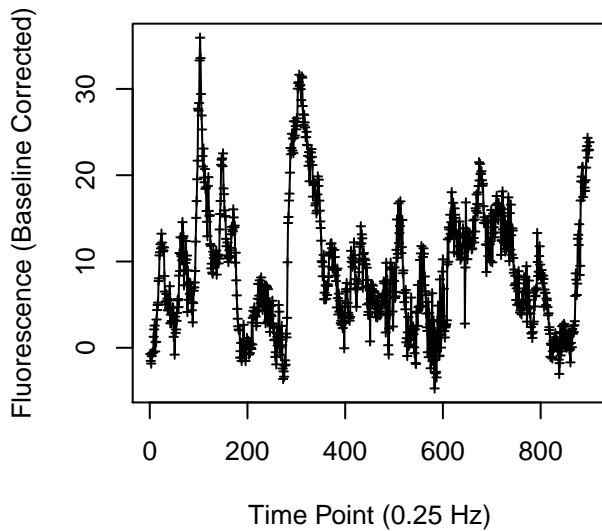

**Cell 581**

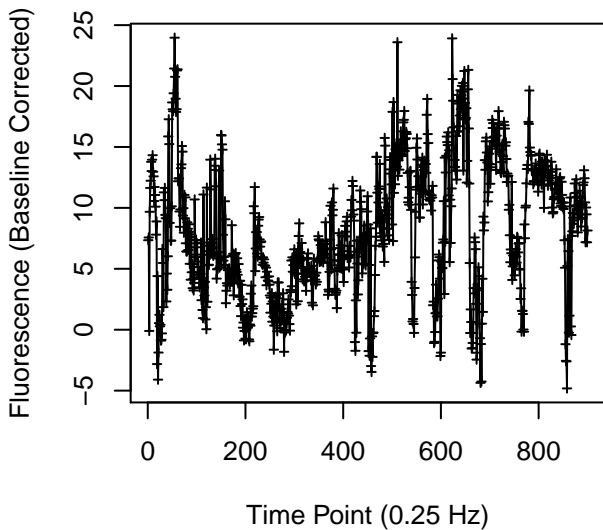

**Cell 582**

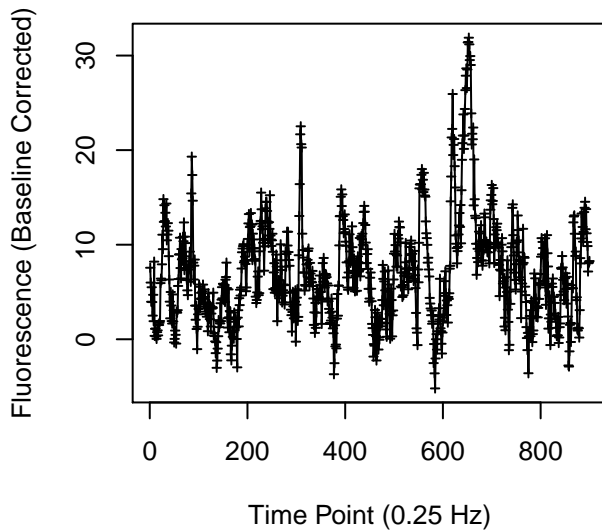

**Cell 583**

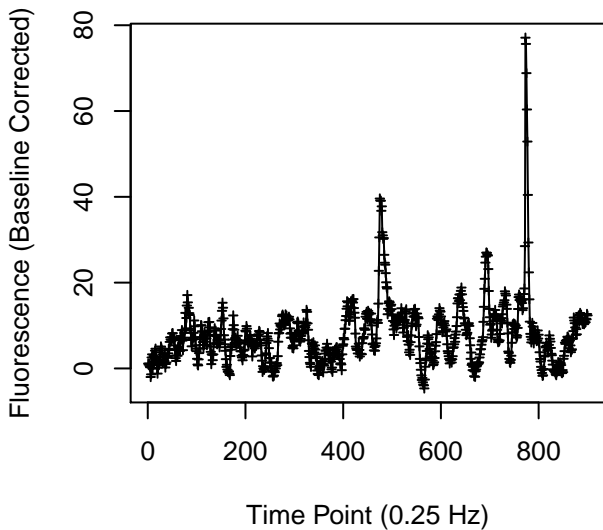

**Cell 584**

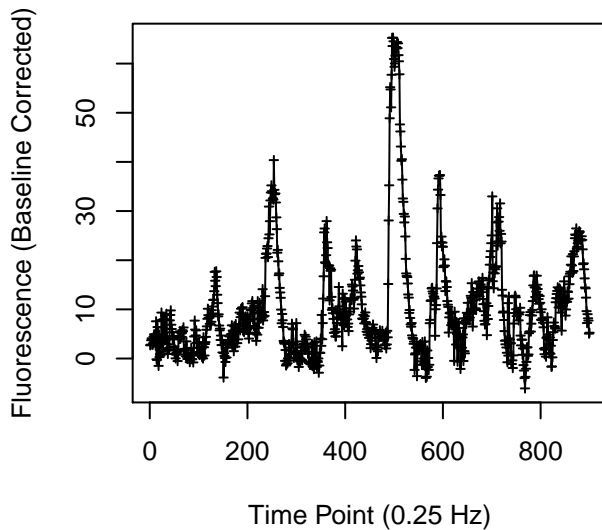

**Cell 585**

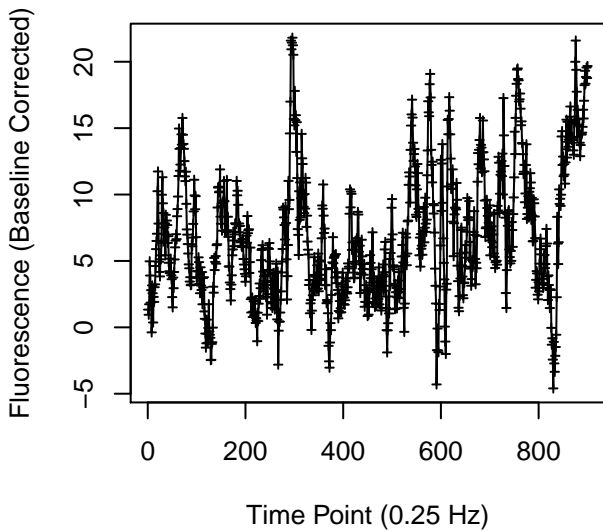

**Cell 586**

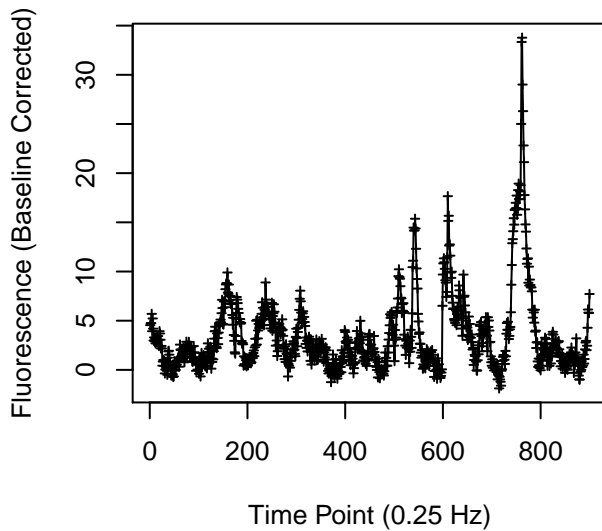

**Cell 587**

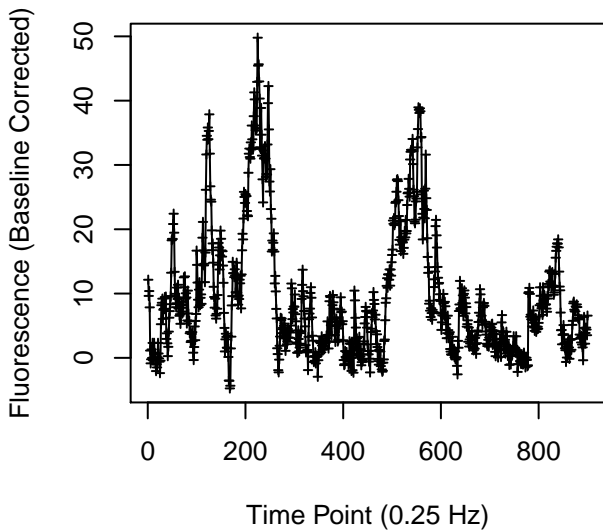

**Cell 588**

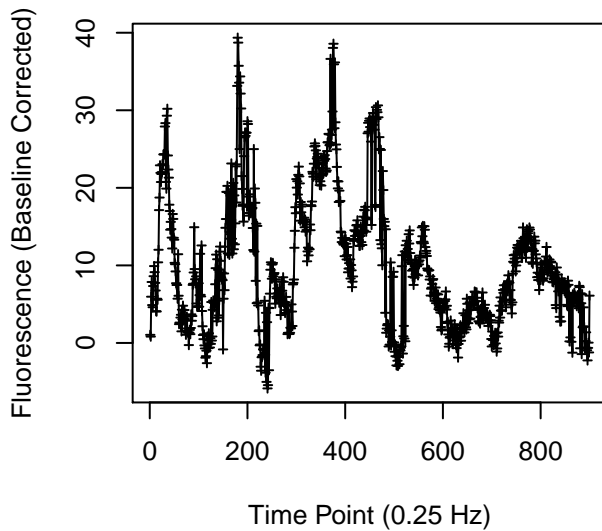

**Cell 589**

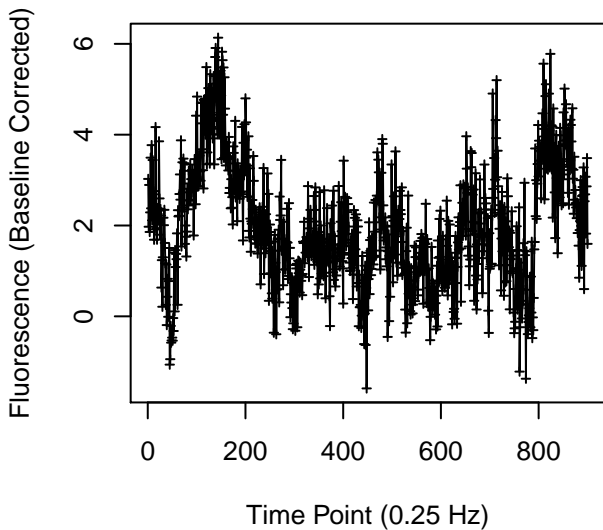

**Cell 590**

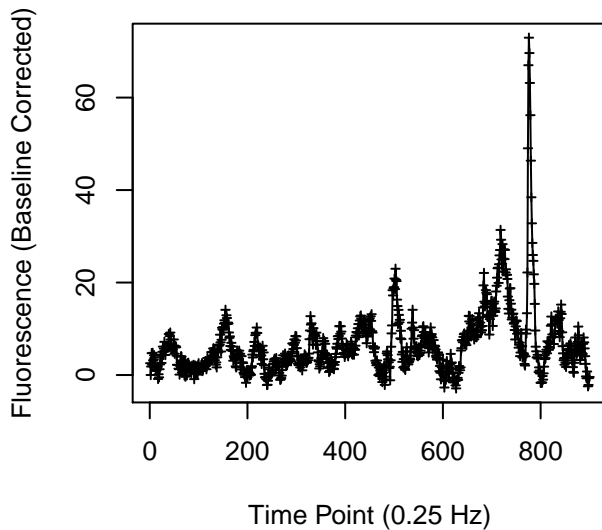

**Cell 591**

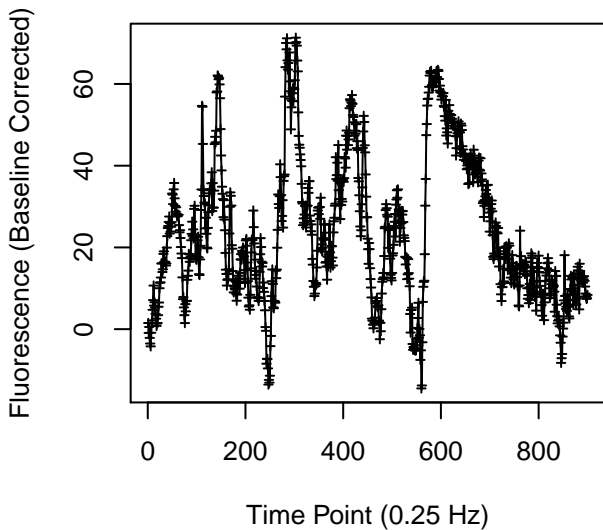

**Cell 592**

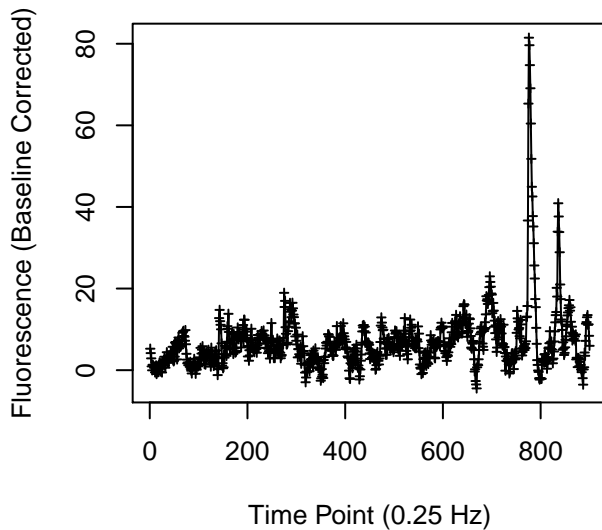

**Cell 593**

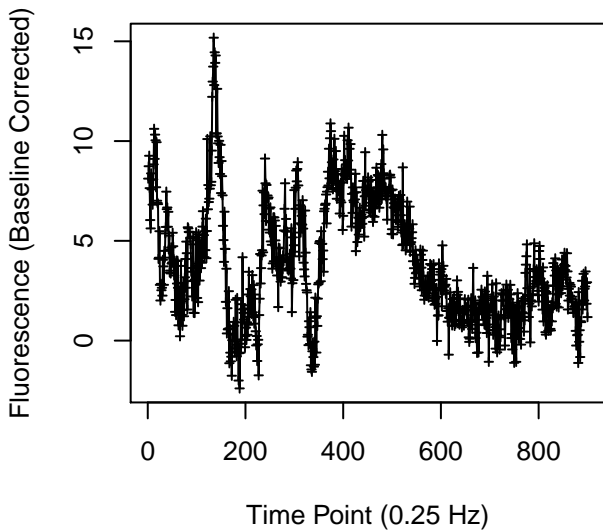

**Cell 594**

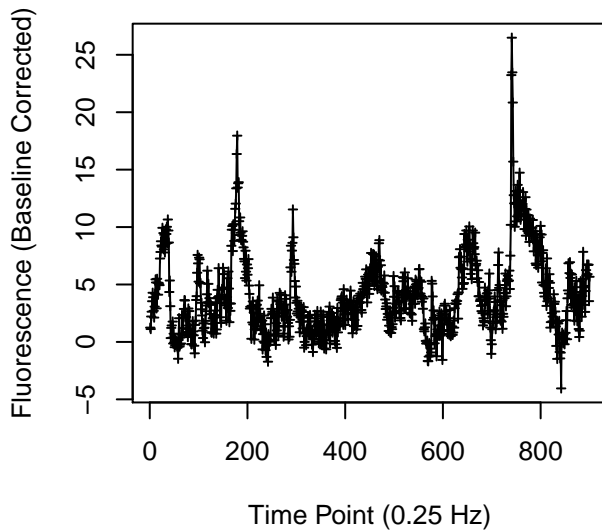

**Cell 595**

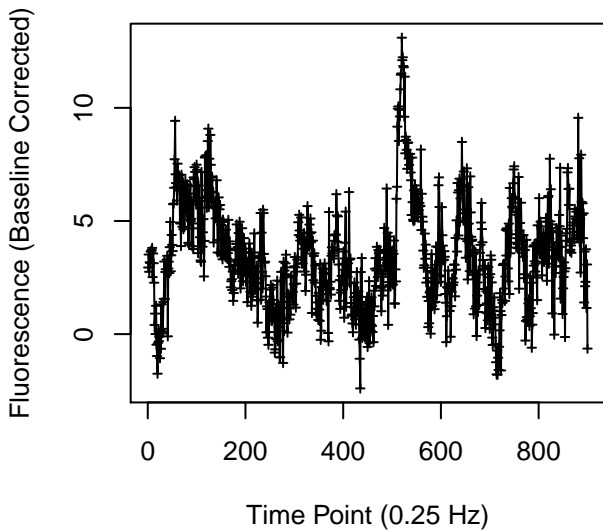

**Cell 596**

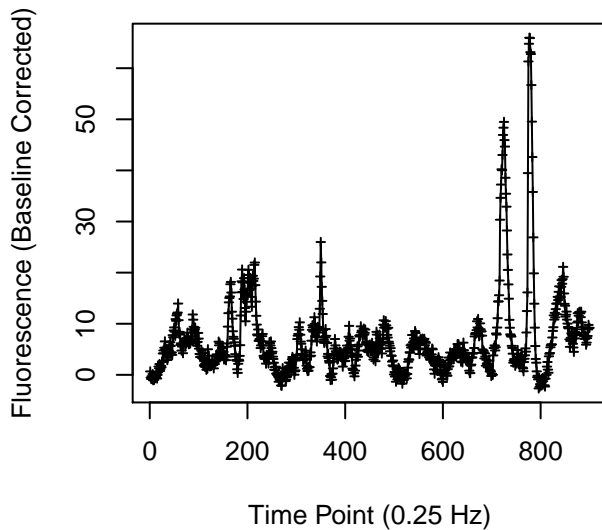

**Cell 597**

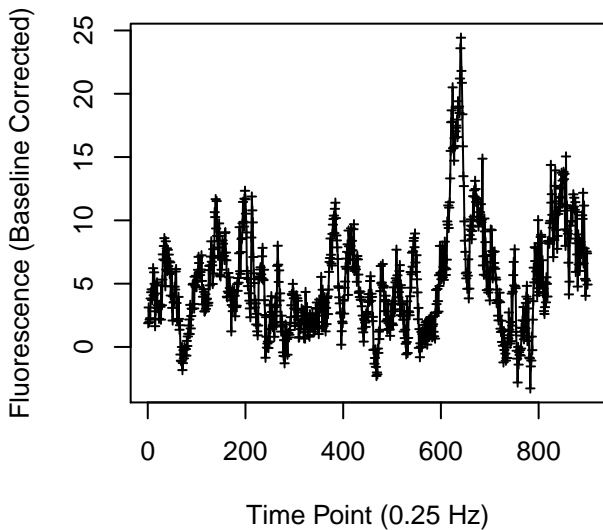

**Cell 598**

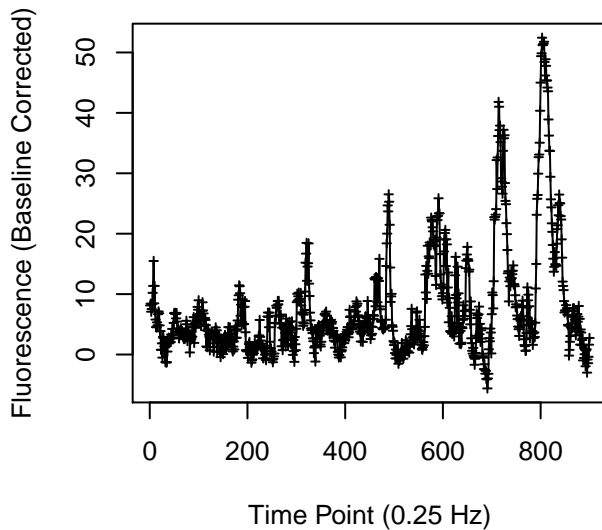

**Cell 599**

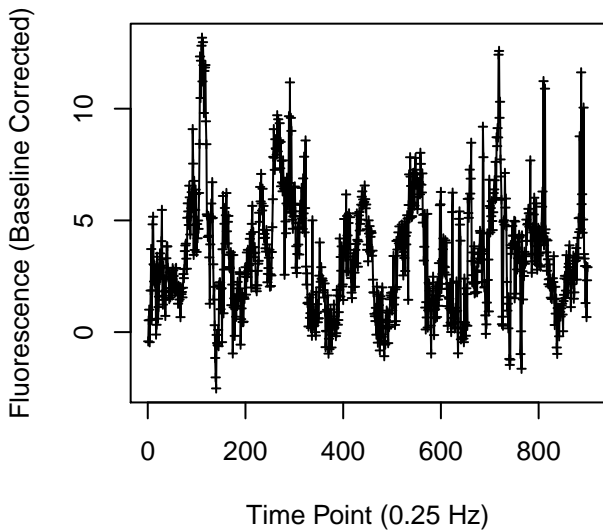

**Cell 600**

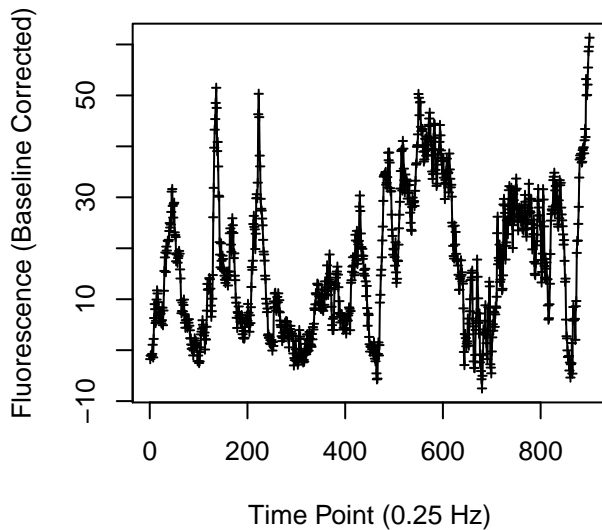

**Cell 601**

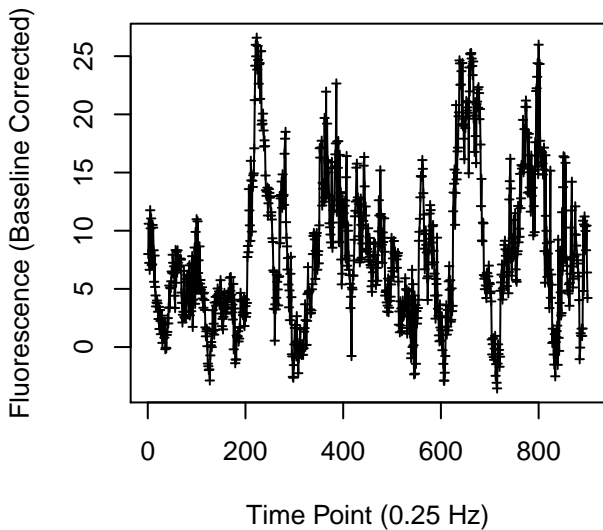

**Cell 602**

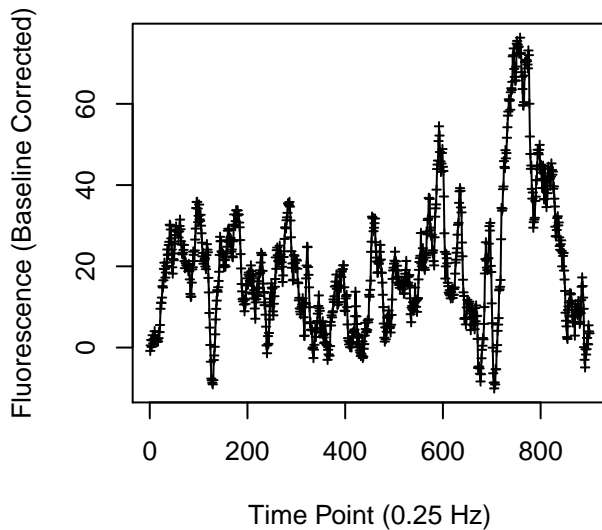

**Cell 603**

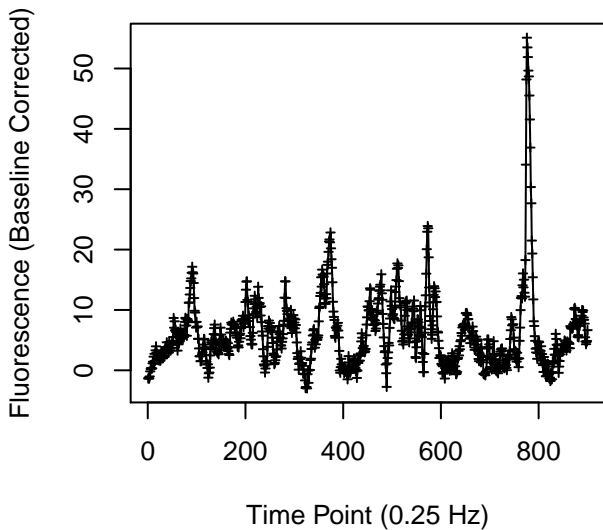

**Cell 604**

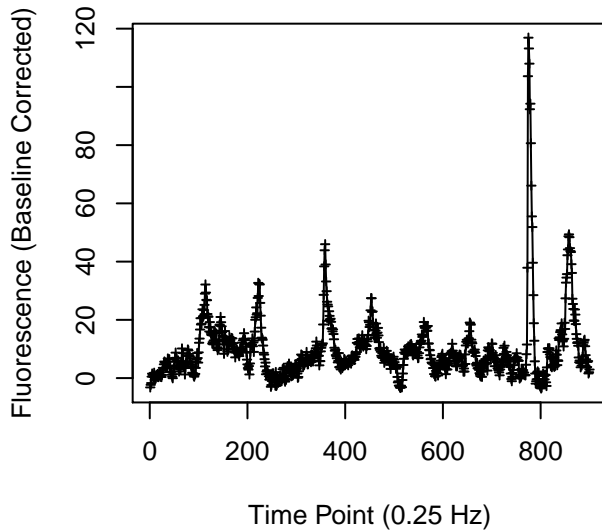

**Cell 605**

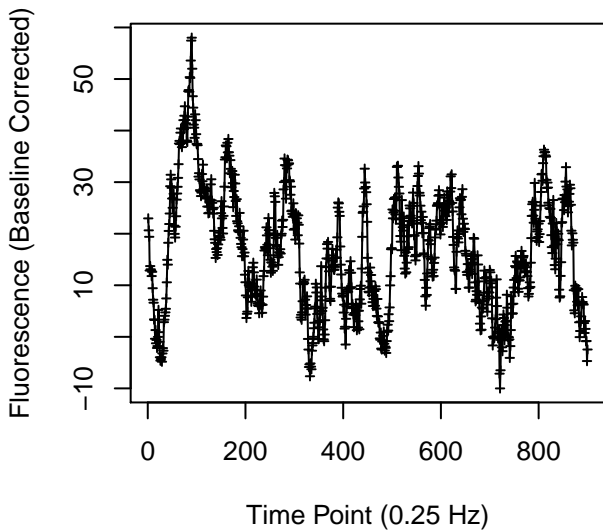

**Cell 606**

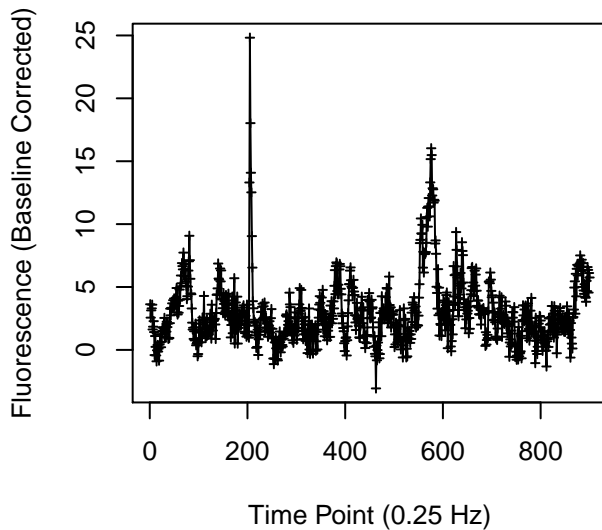

**Cell 607**

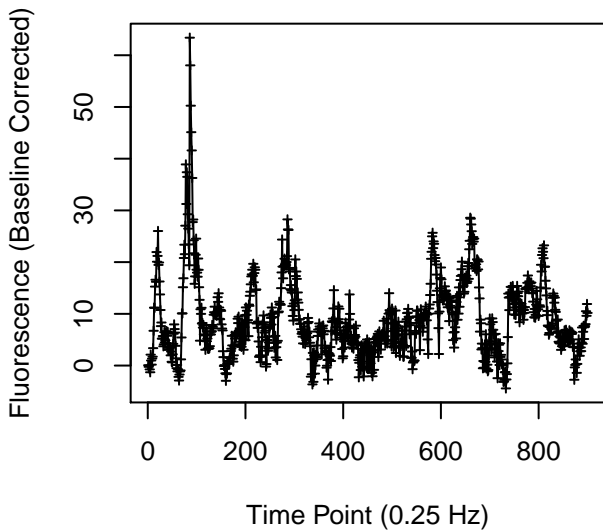

**Cell 608**

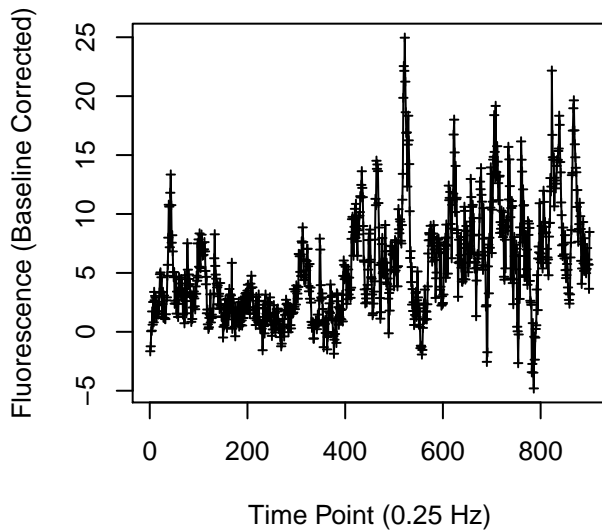

**Cell 609**

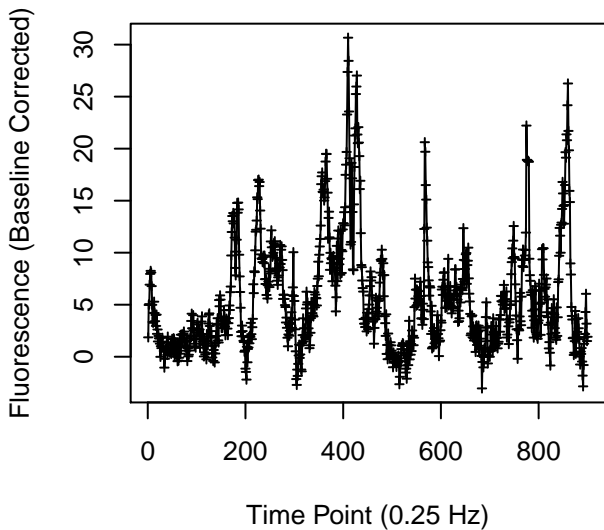

**Cell 610**

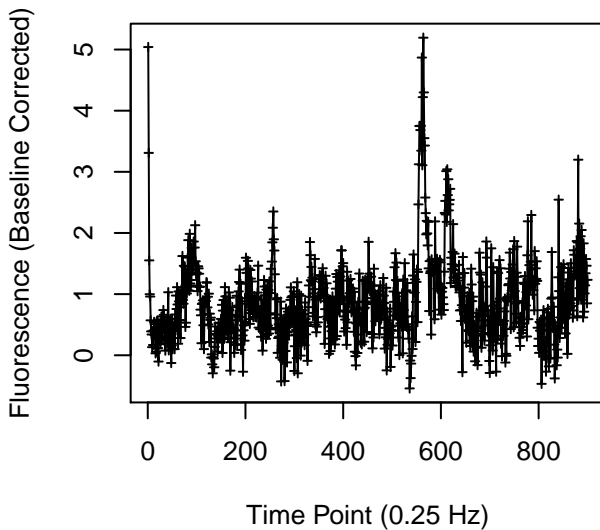

**Cell 611**

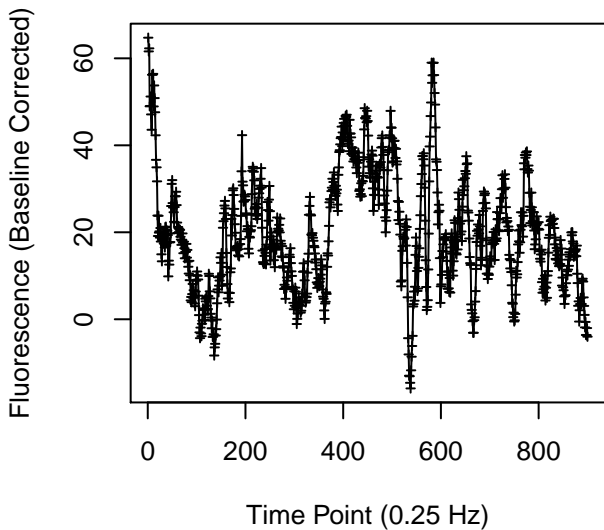

**Cell 612**

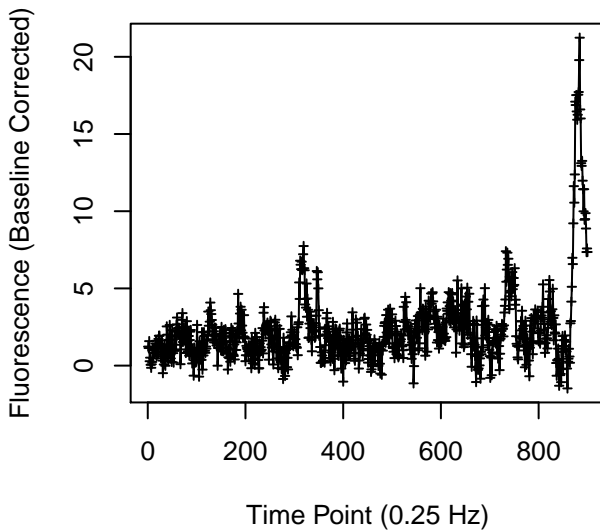

**Cell 613**

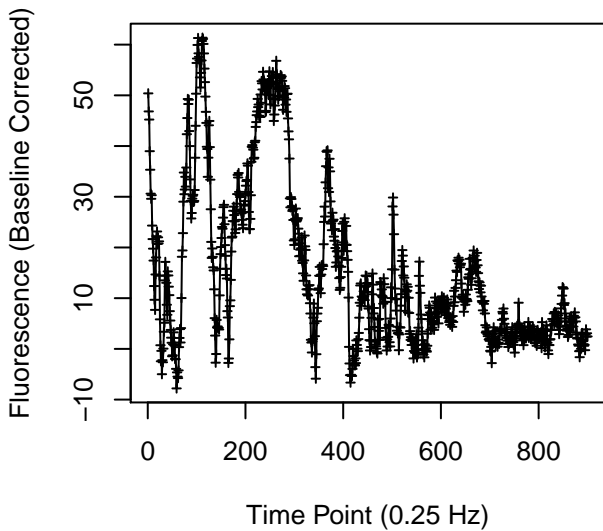

**Cell 614**

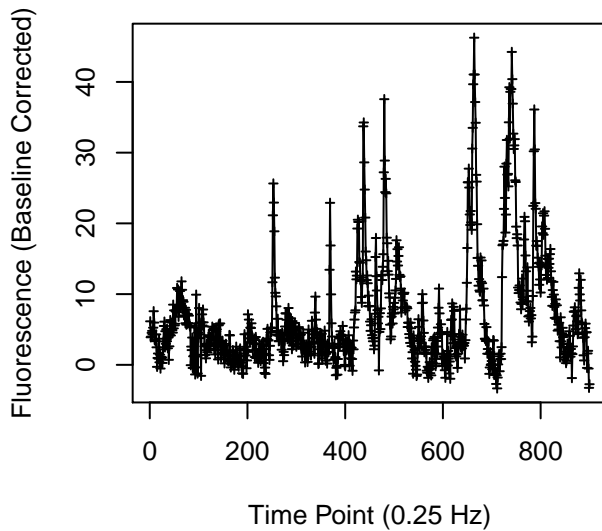

**Cell 615**

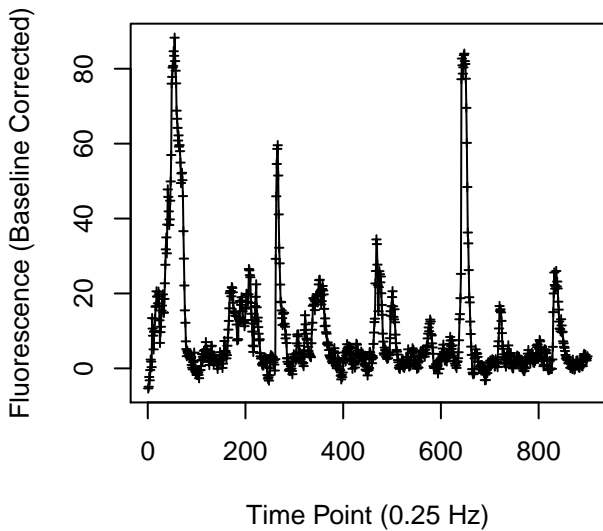

**Cell 616**

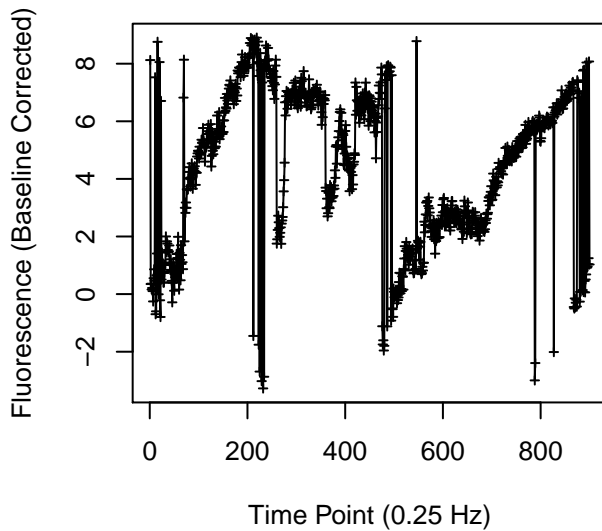

**Cell 617**

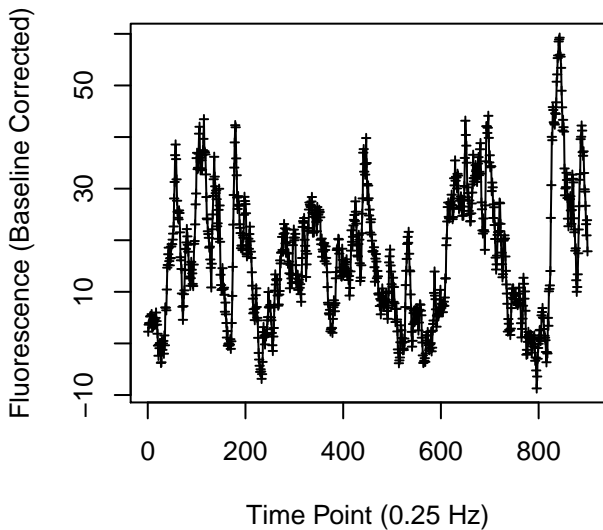

**Cell 618**

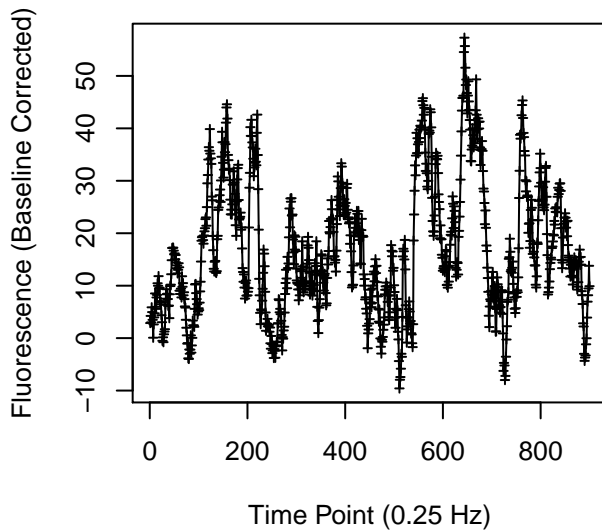

**Cell 619**

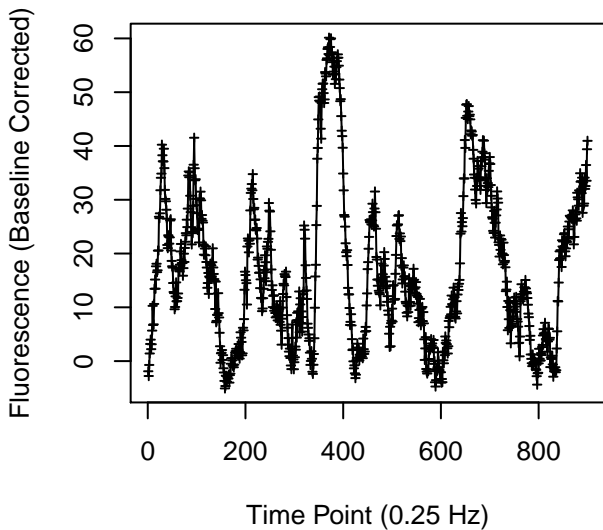

**Cell 620**

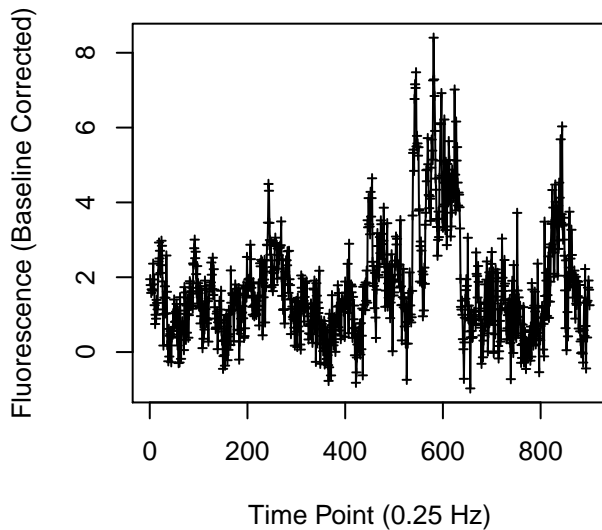

**Cell 621**

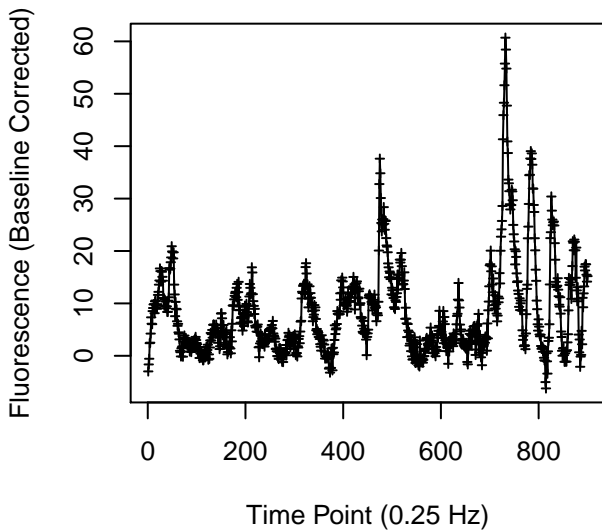

**Cell 622**

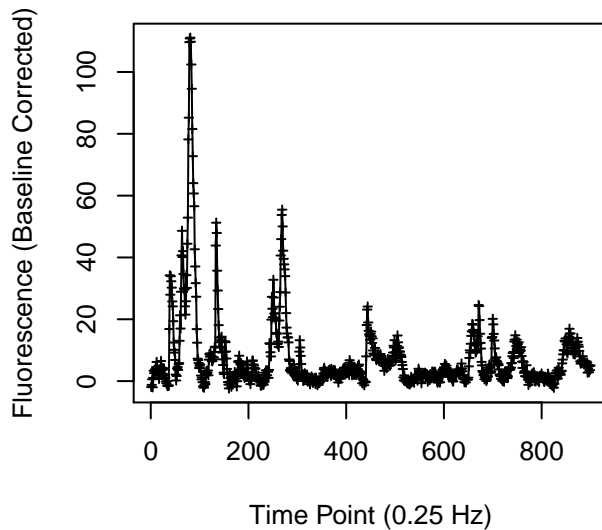

**Cell 623**

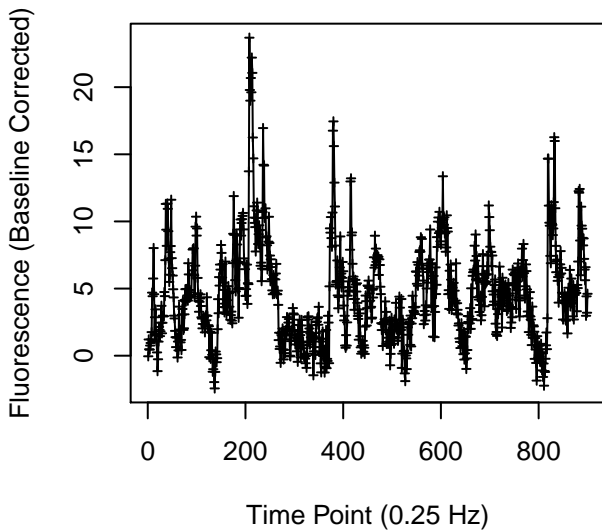

**Cell 624**

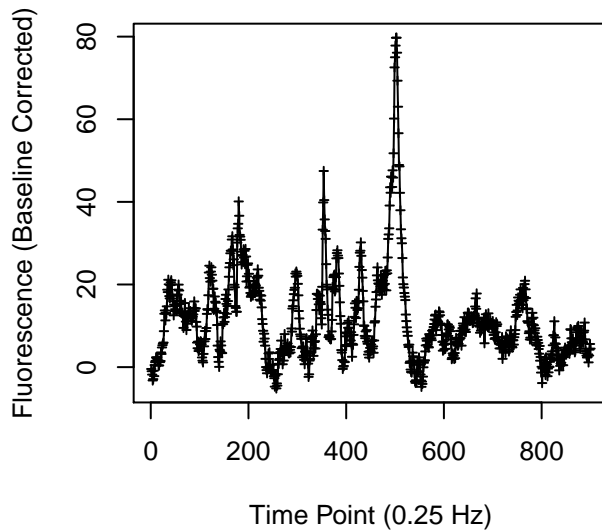

**Cell 625**

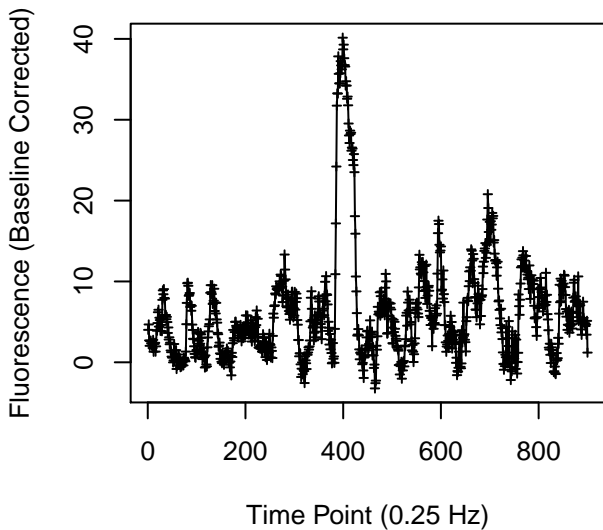

**Cell 626**

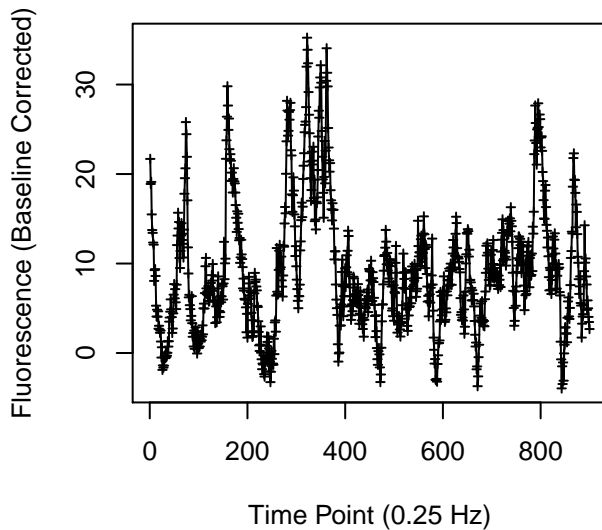

**Cell 627**

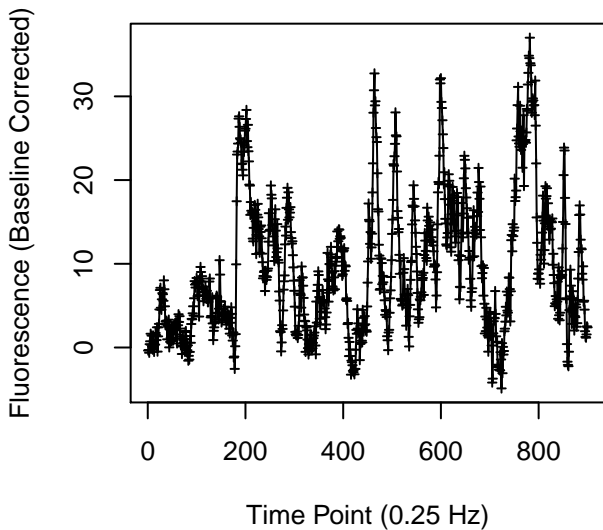

**Cell 628**

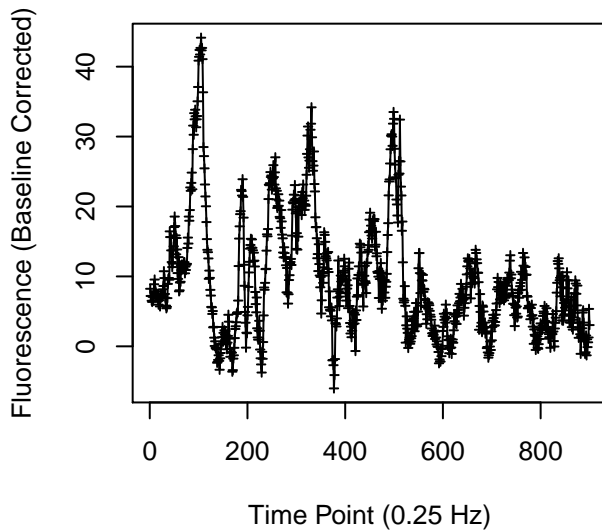

**Cell 629**

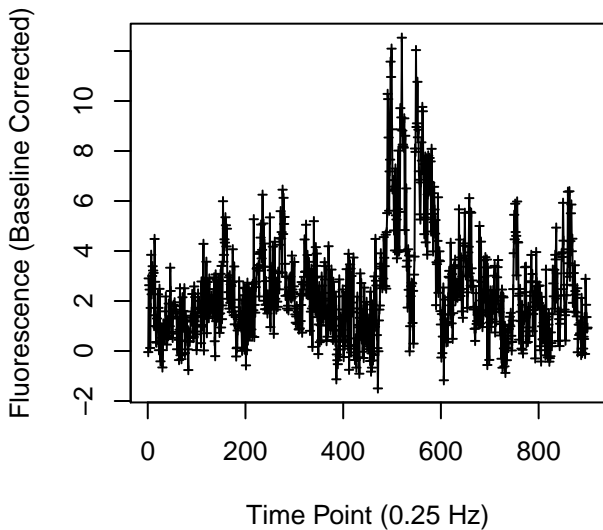

**Cell 630**

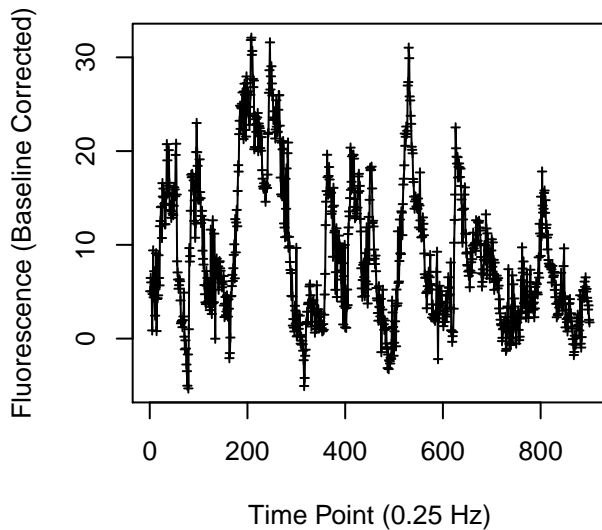

**Cell 631**

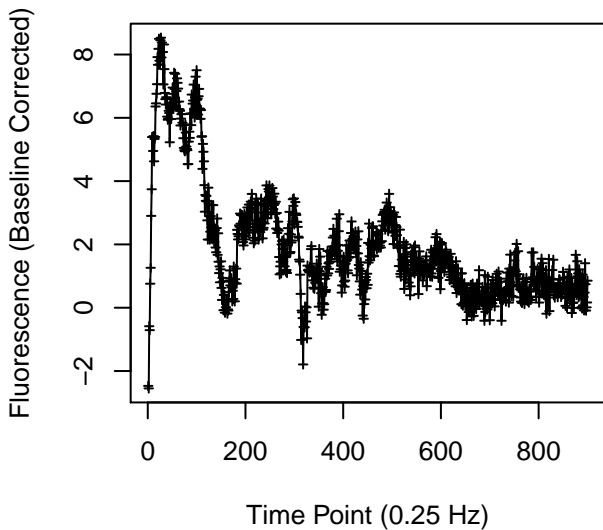

**Cell 632**

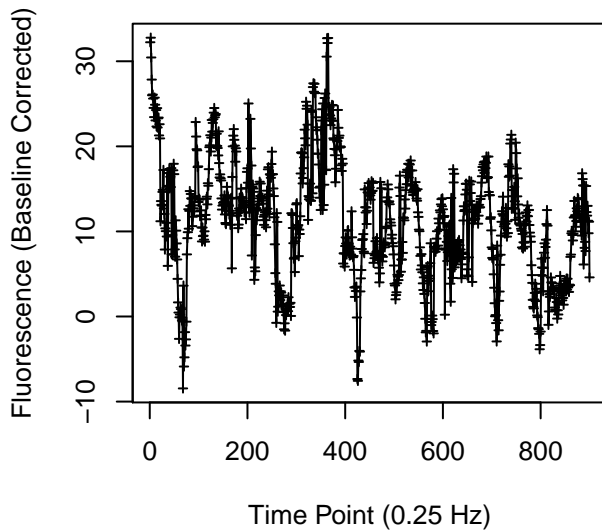

**Cell 633**

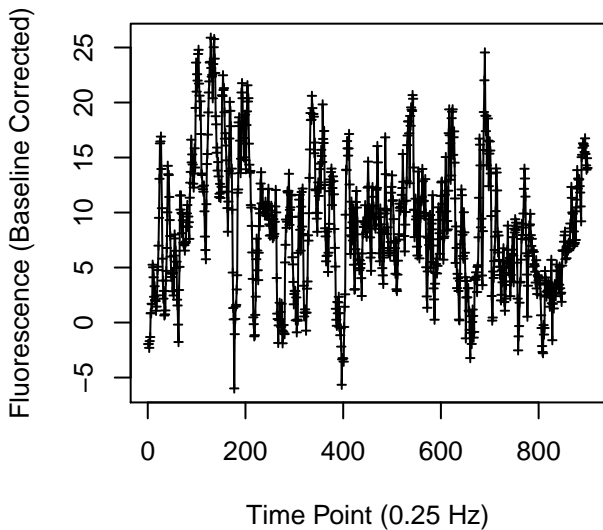

**Cell 634**

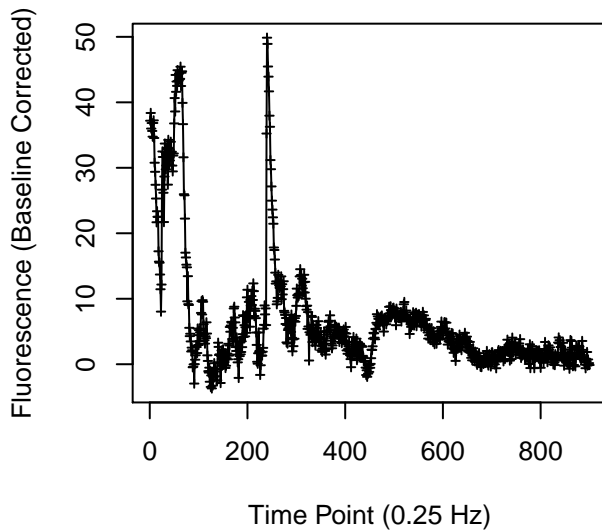

**Cell 635**

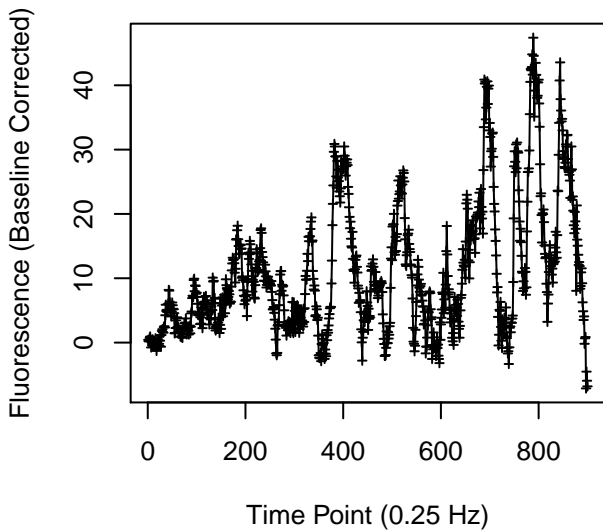

**Cell 636**

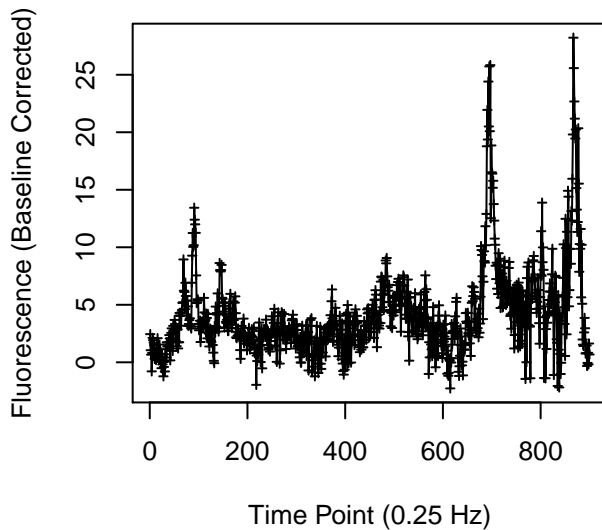

**Cell 637**

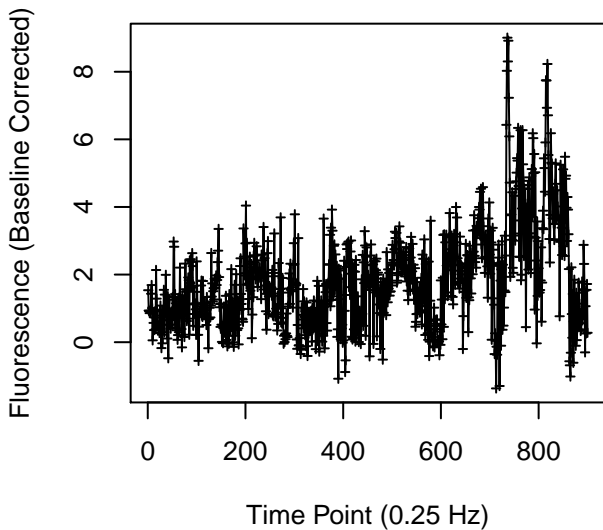

**Cell 638**

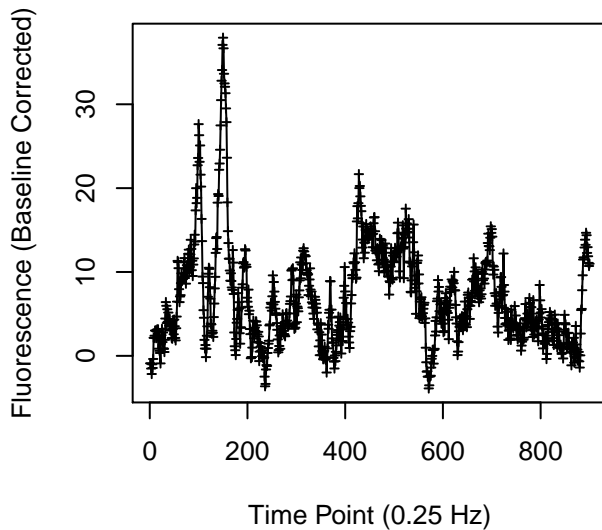

**Cell 639**

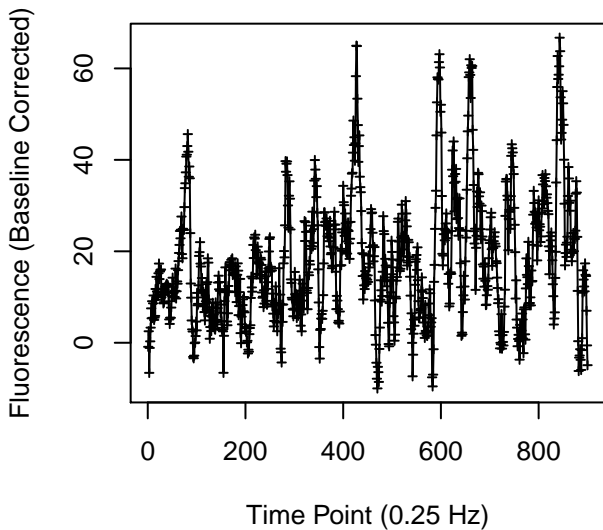

**Cell 640**

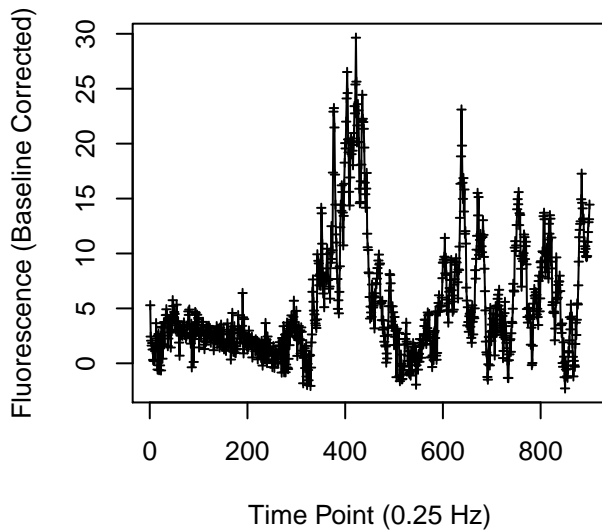

**Cell 641**

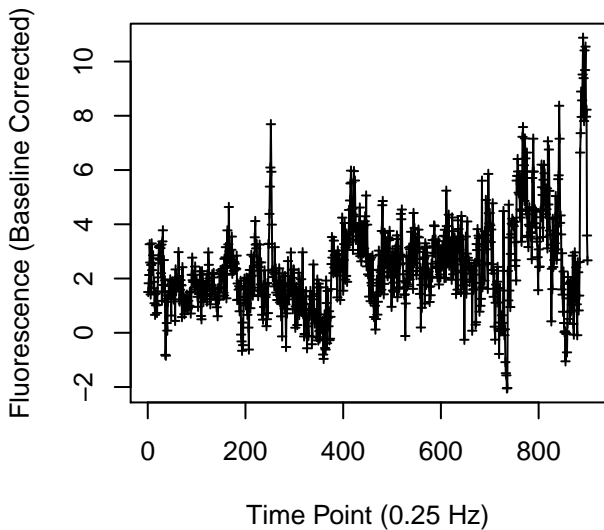

**Cell 642**

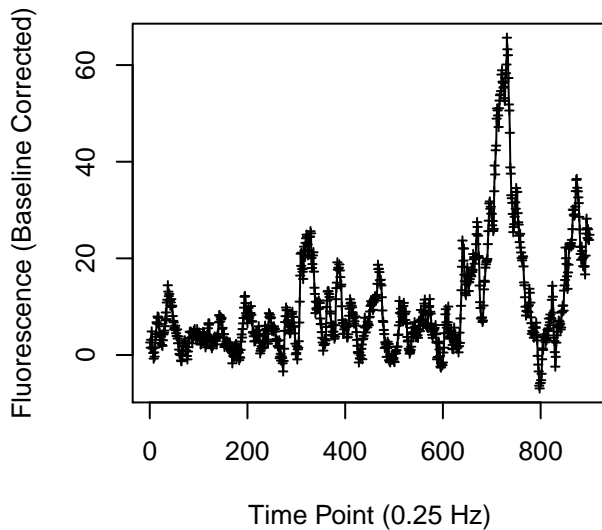

**Cell 643**

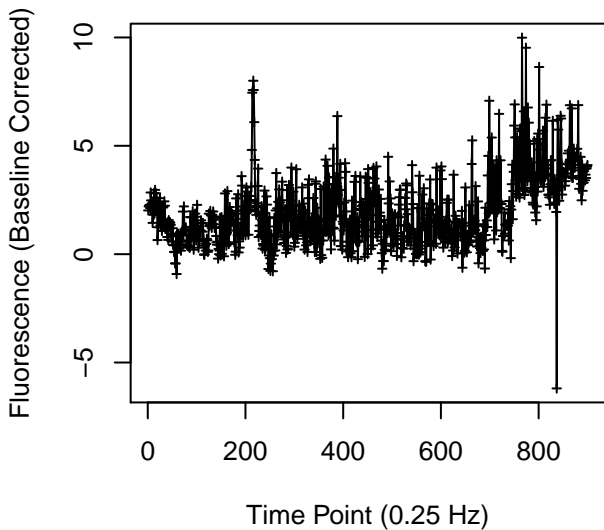

**Cell 644**

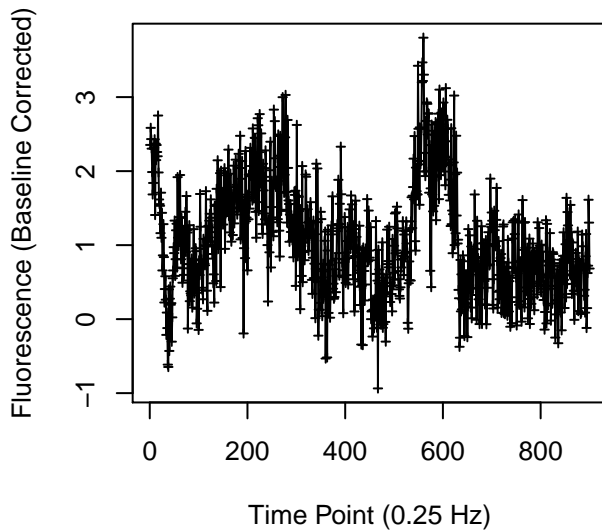

**Cell 645**

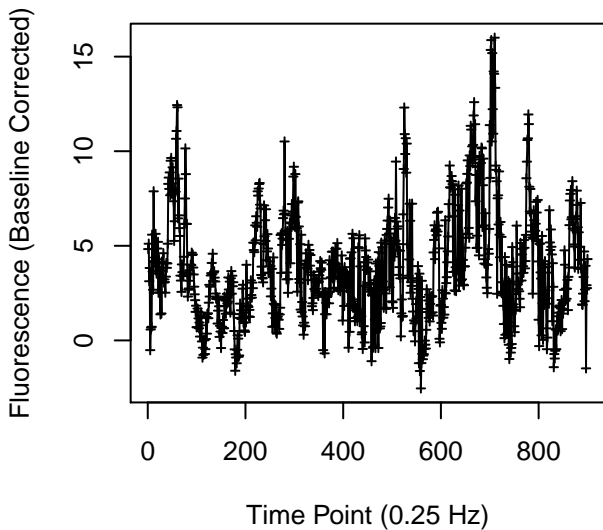

**Cell 646**

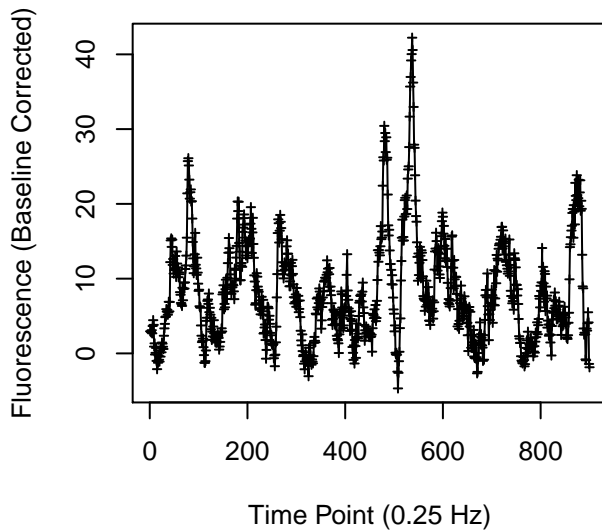

**Cell 647**

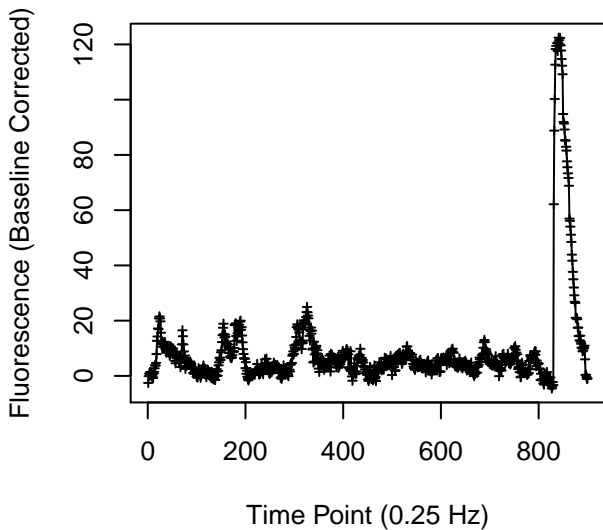

**Cell 648**

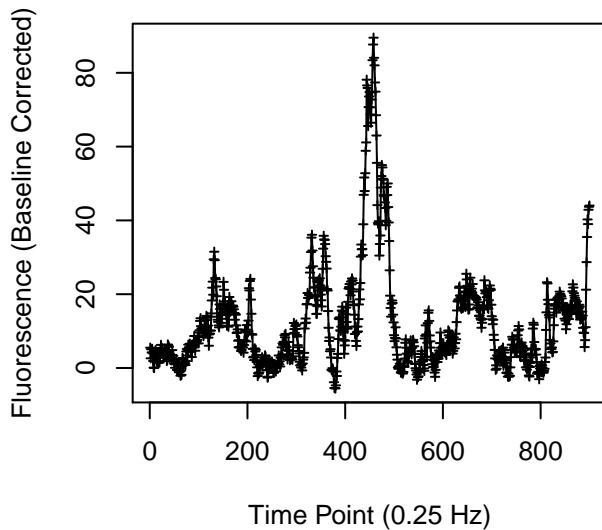

**Cell 649**

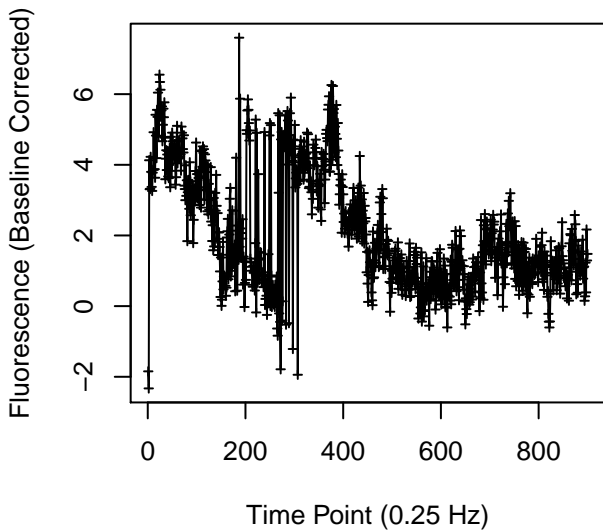

**Cell 650**

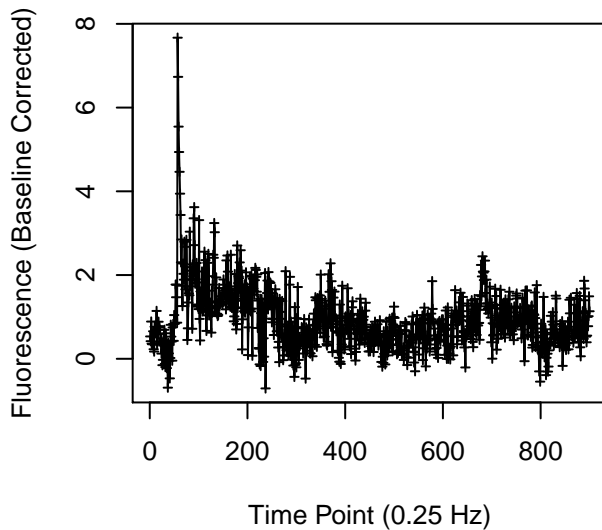

**Cell 651**

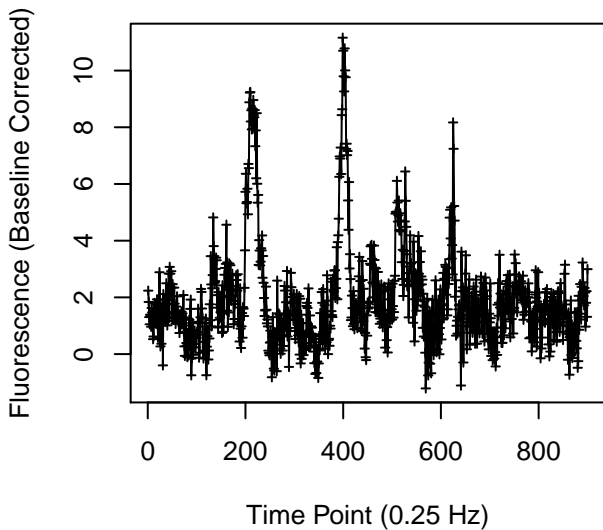

**Cell 652**

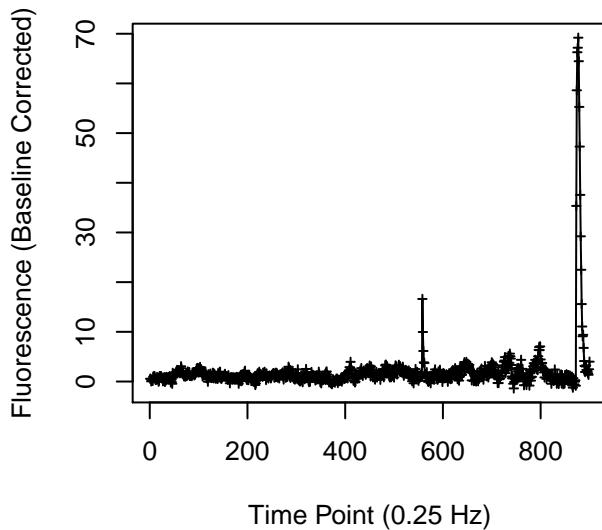

**Cell 653**

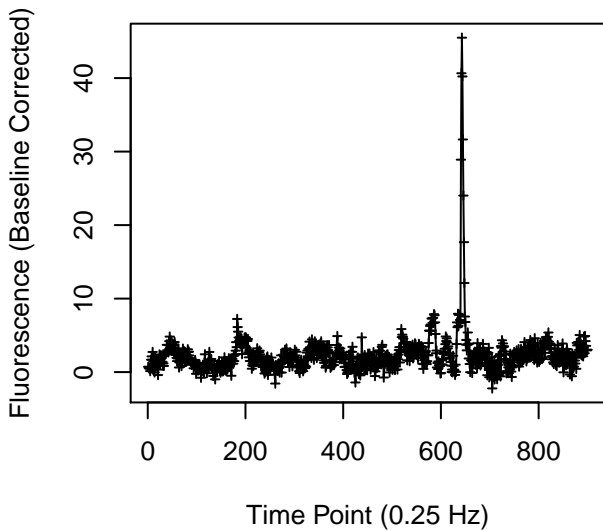

**Cell 654**

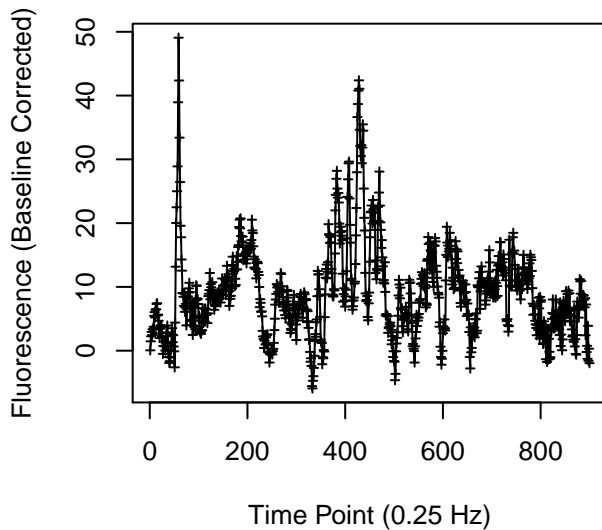

**Cell 655**

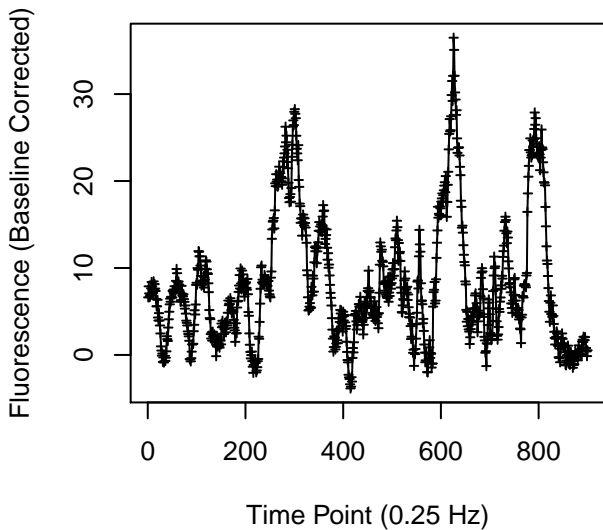

**Cell 656**

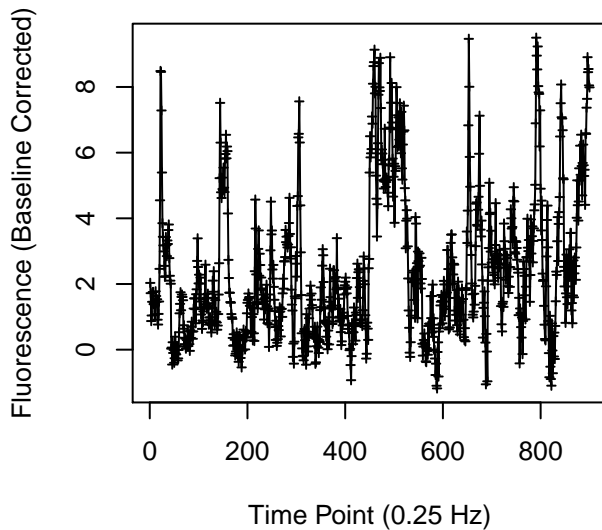

**Cell 657**

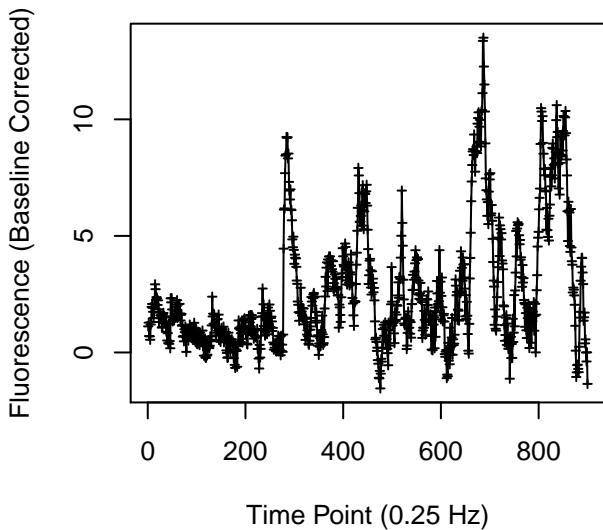

**Cell 658**

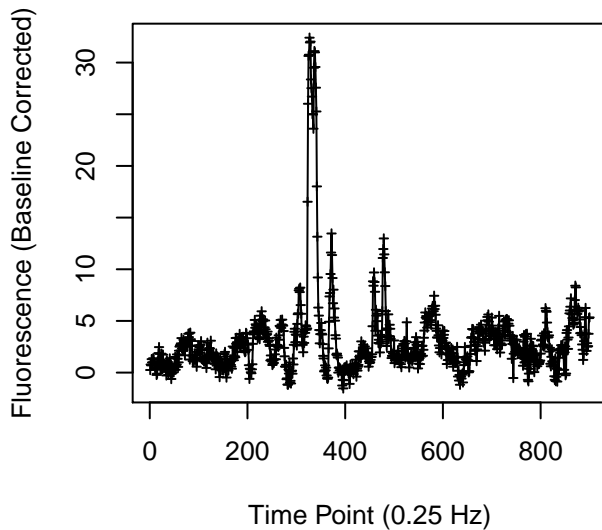

**Cell 659**

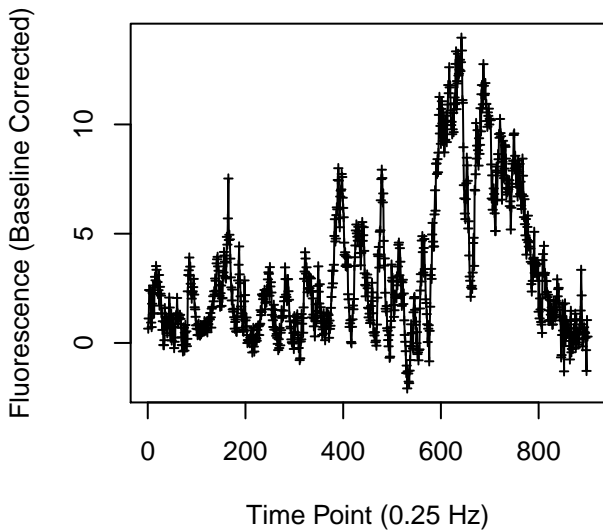

**Cell 660**

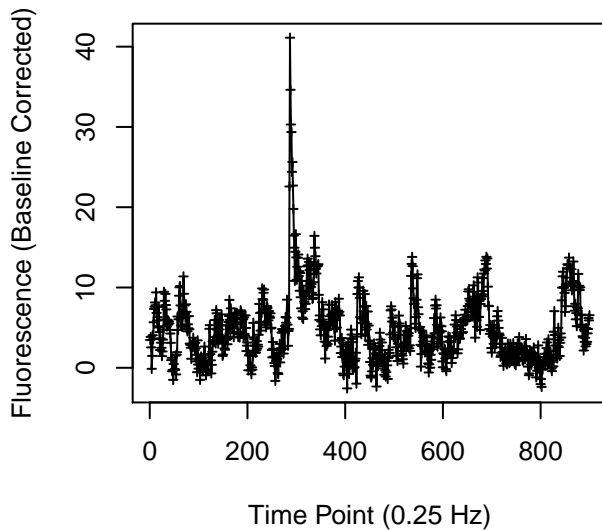

**Cell 661**

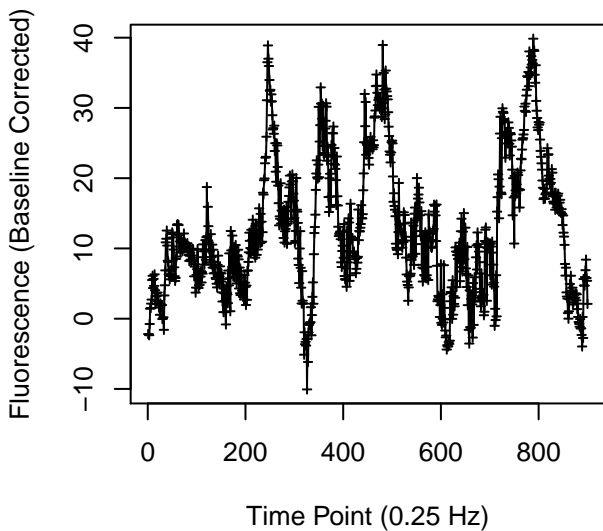

**Cell 662**

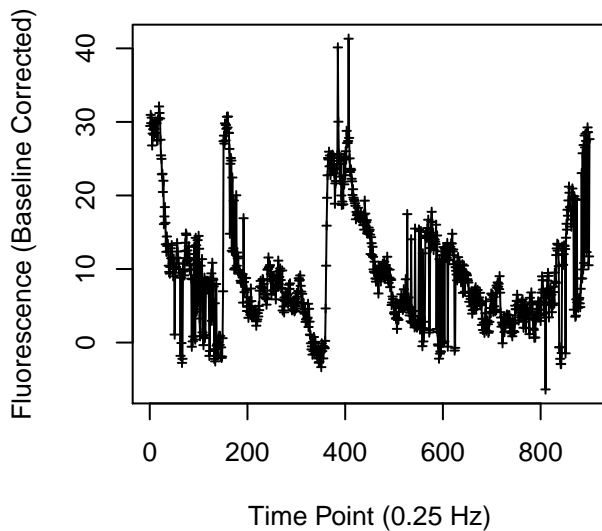

**Cell 663**

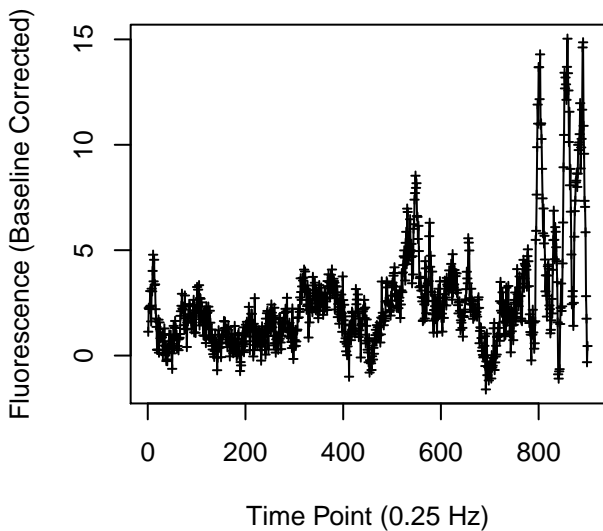

**Cell 664**

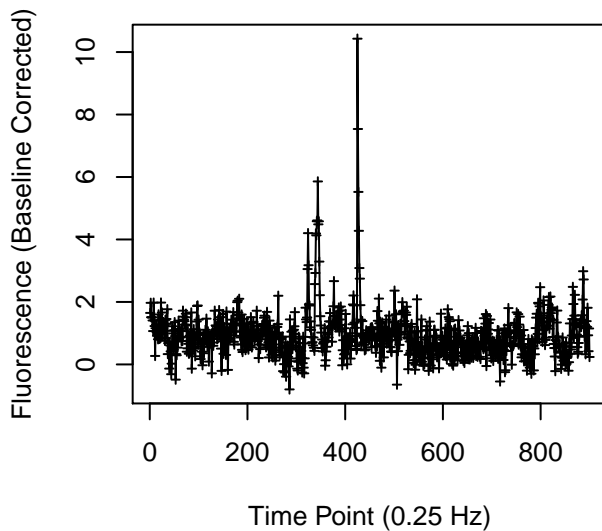

**Cell 665**

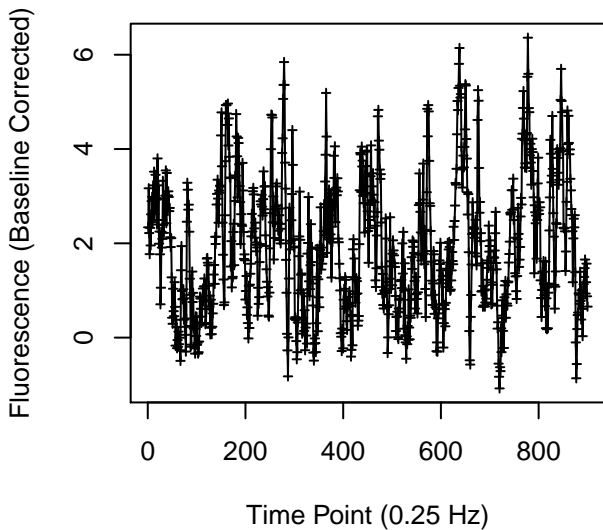

**Cell 666**

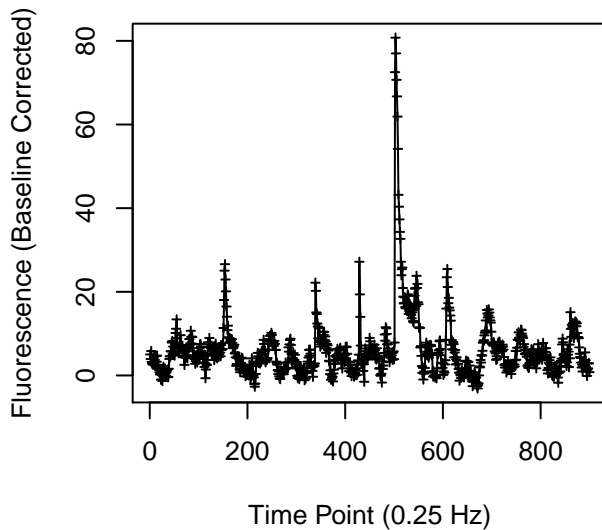

**Cell 667**

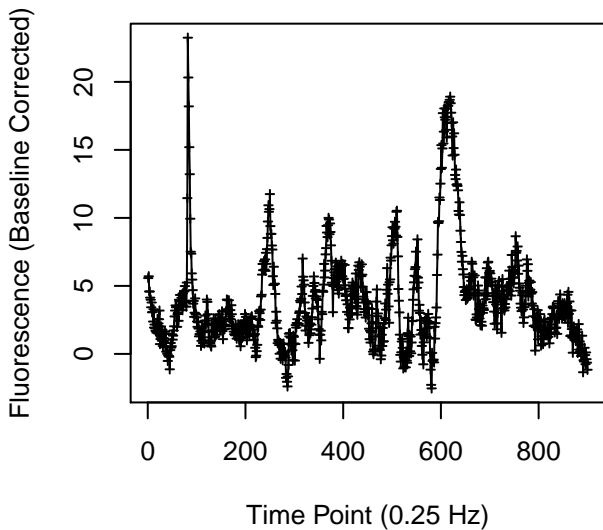

**Cell 668**

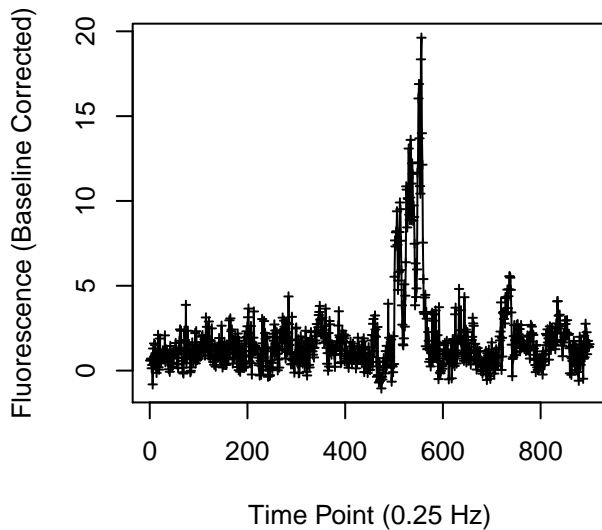

**Cell 669**

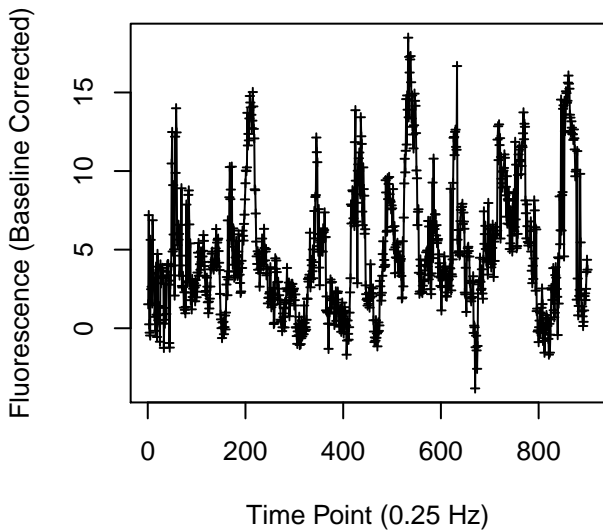

**Cell 670**

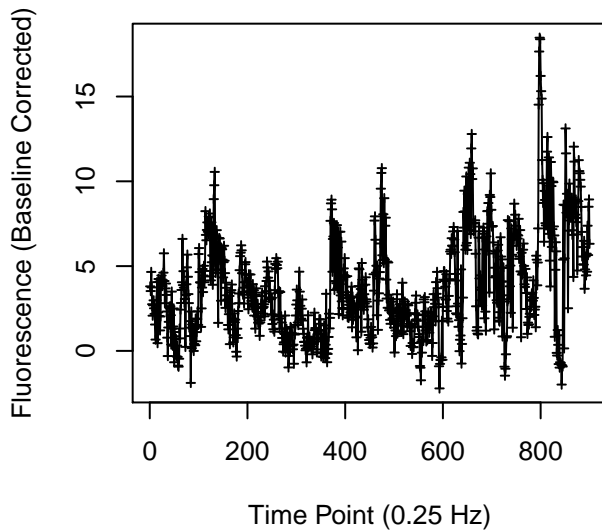

**Cell 671**

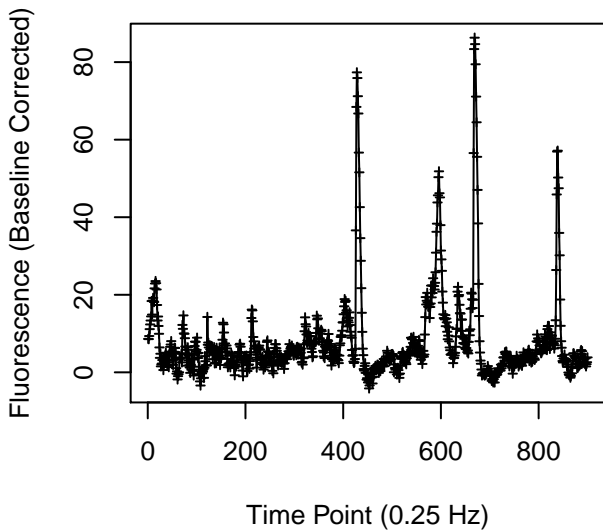

**Cell 672**

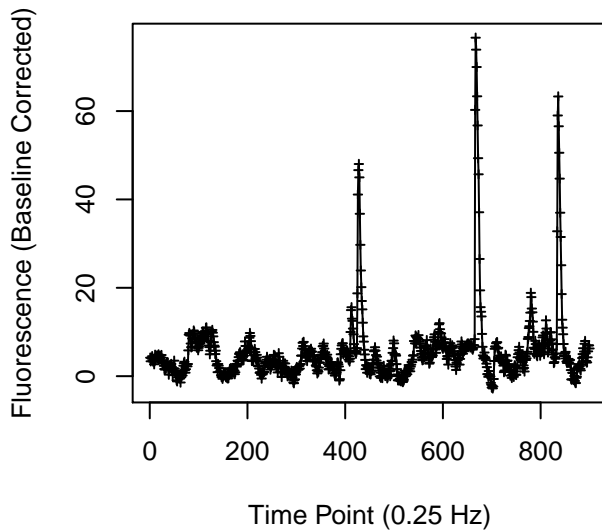

**Cell 673**

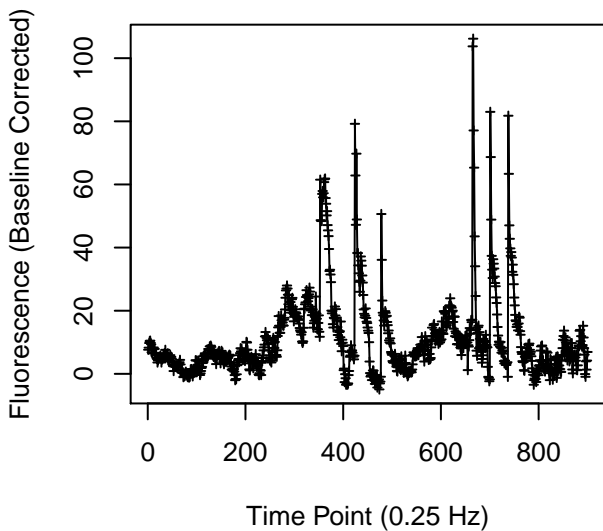

**Cell 674**

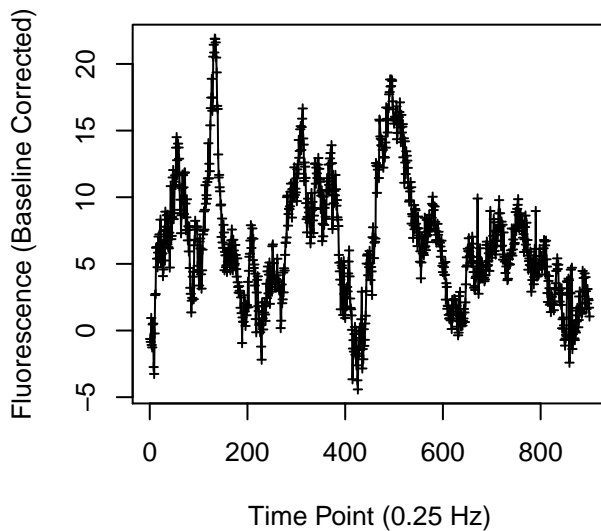

**Cell 675**

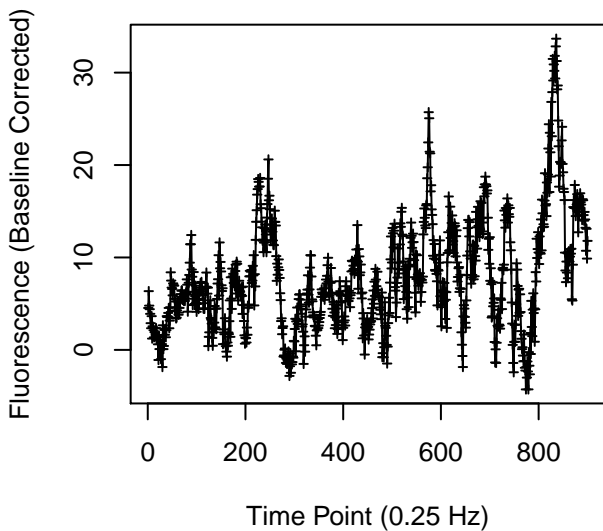

**Cell 676**

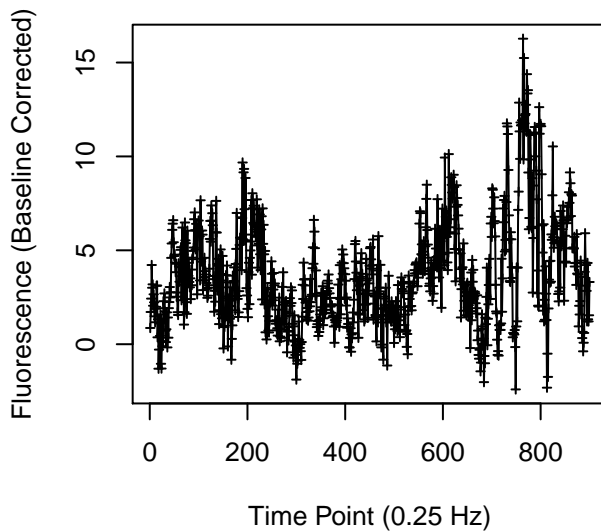

**Cell 677**

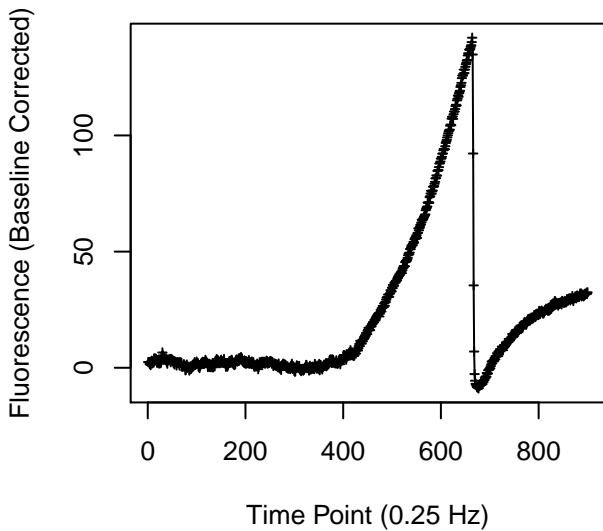

**Cell 678**

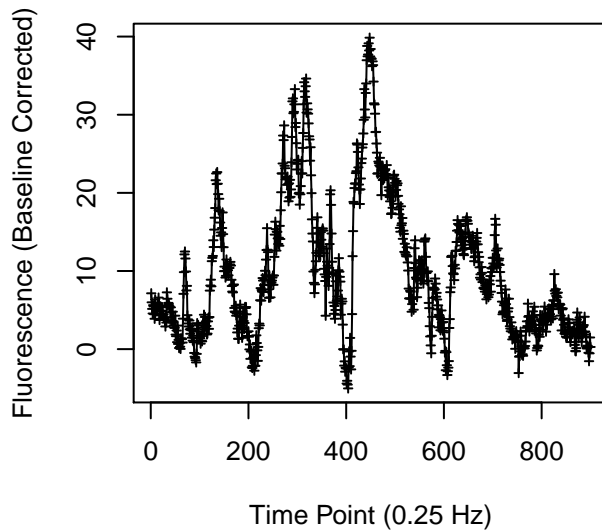

**Cell 679**

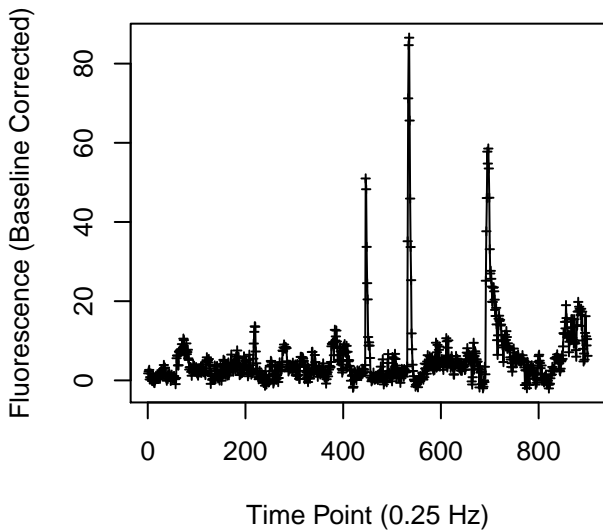

**Cell 680**

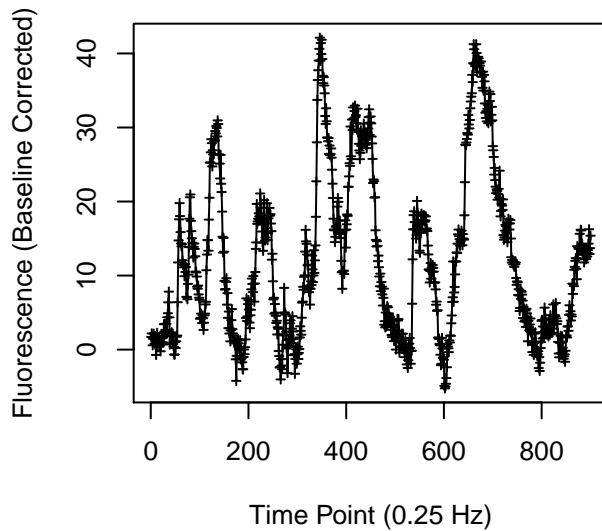

**Cell 681**

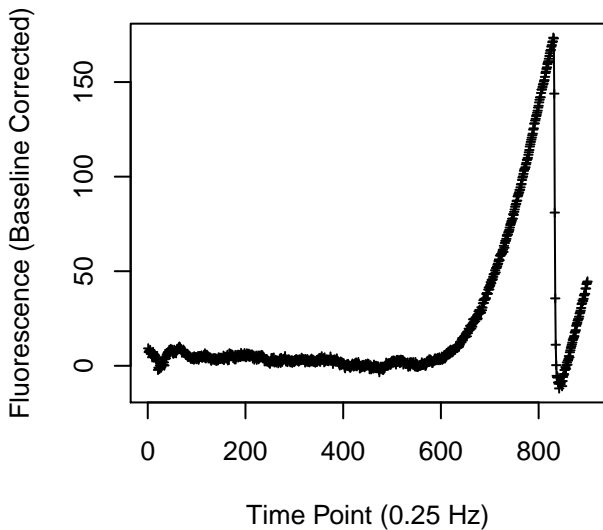

**Cell 682**

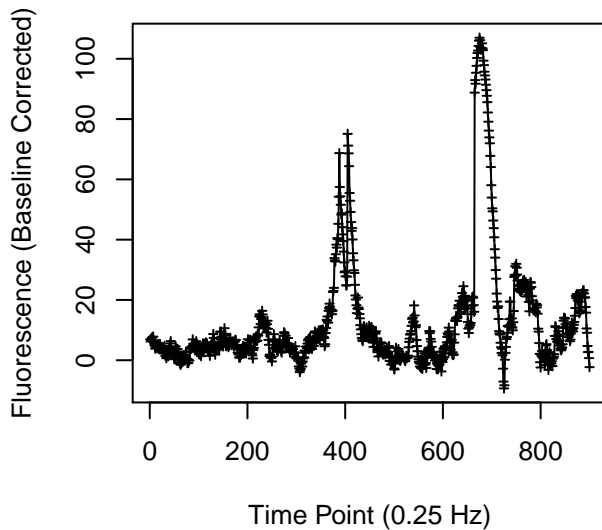

**Cell 683**

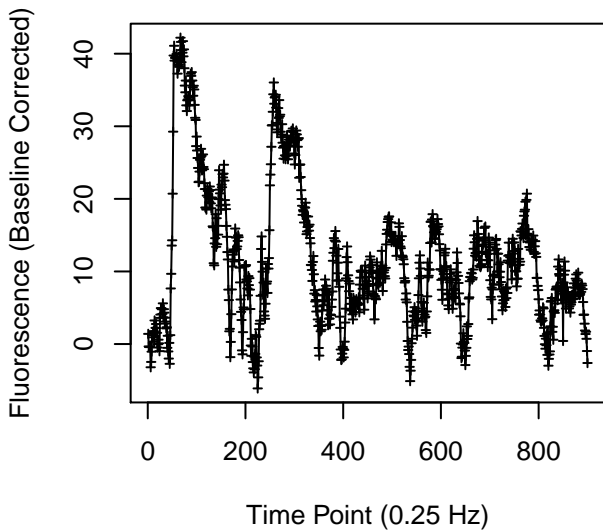

**Cell 684**

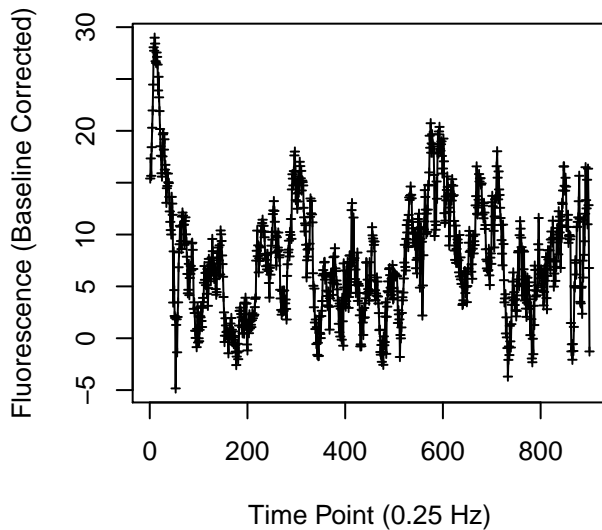

**Cell 685**

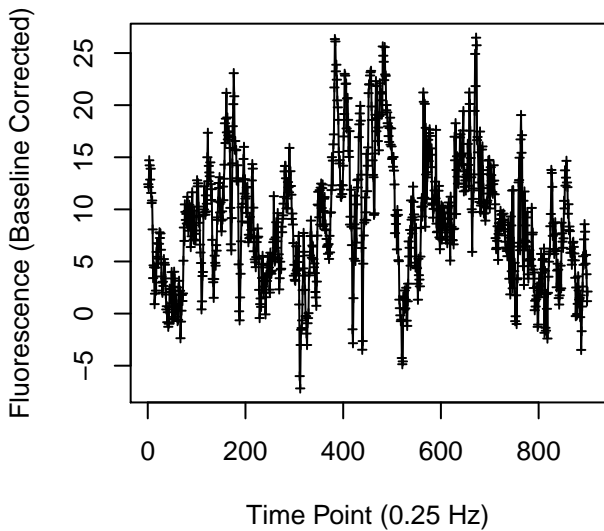

**Cell 686**

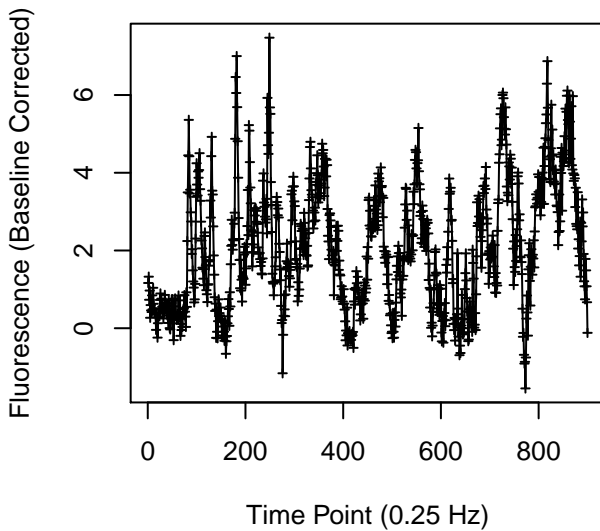

**Cell 687**

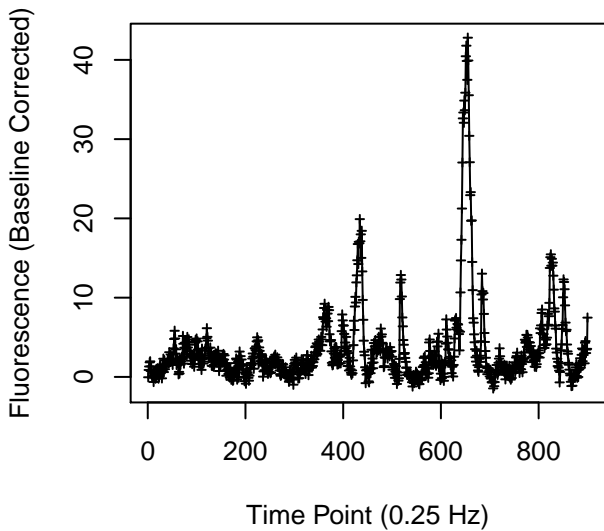

**Cell 688**

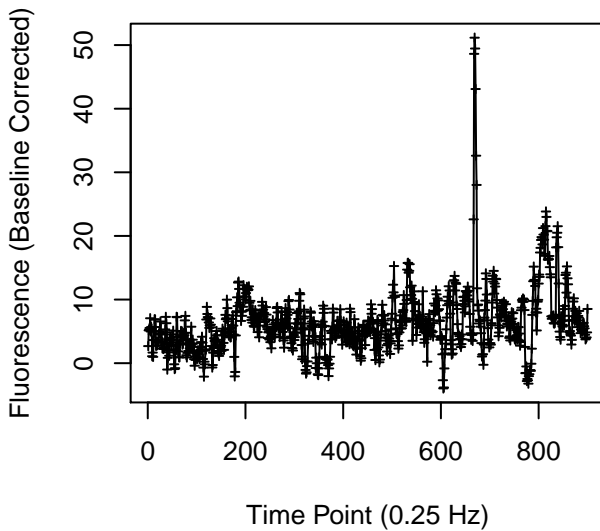

**Cell 689**

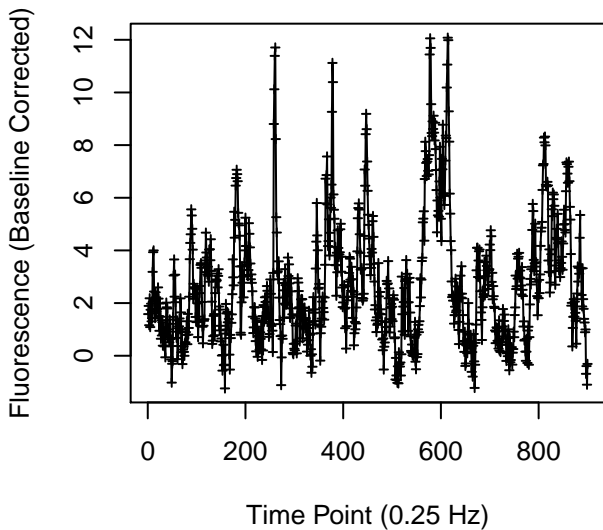

**Cell 690**

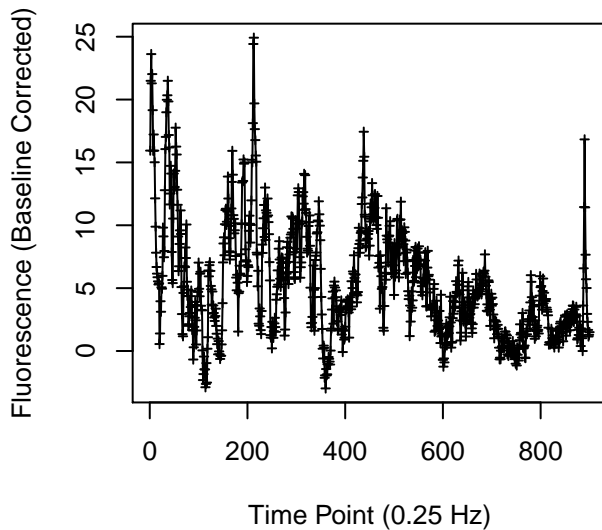

**Cell 691**

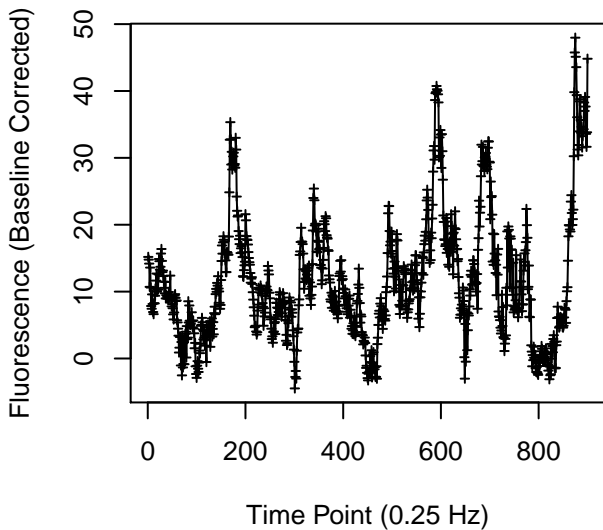

**Cell 692**

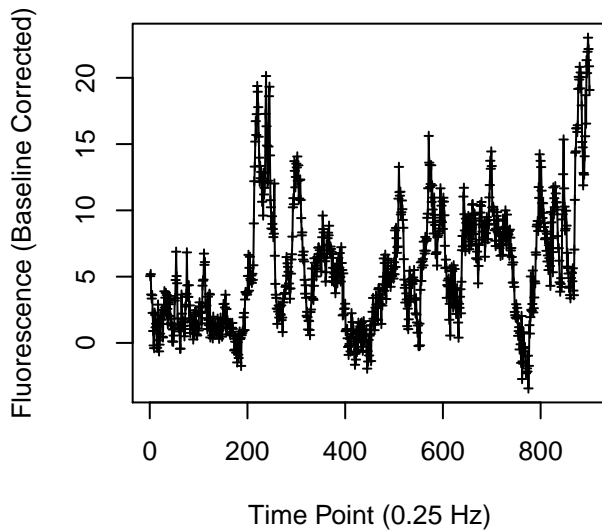

**Cell 693**

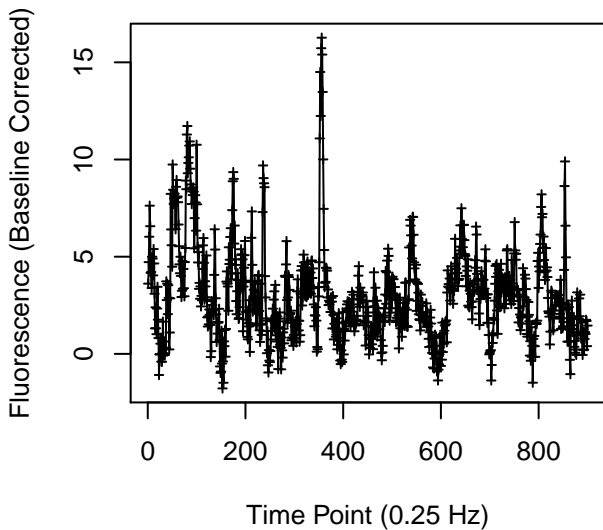

**Cell 694**

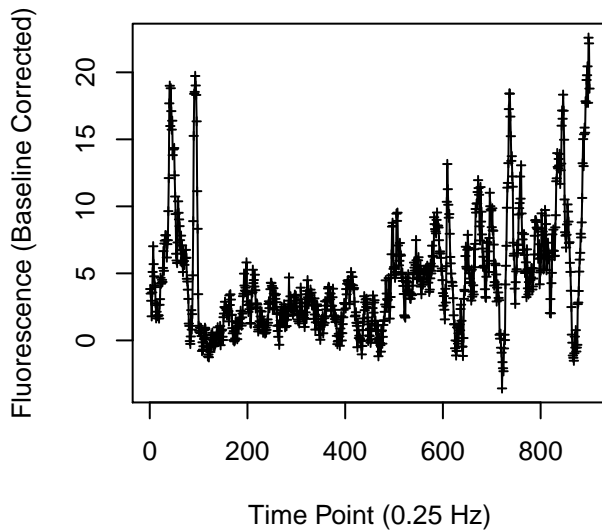

**Cell 695**

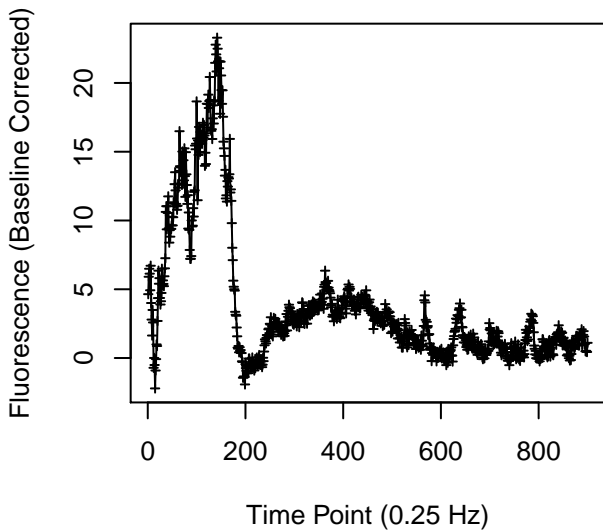

**Cell 696**

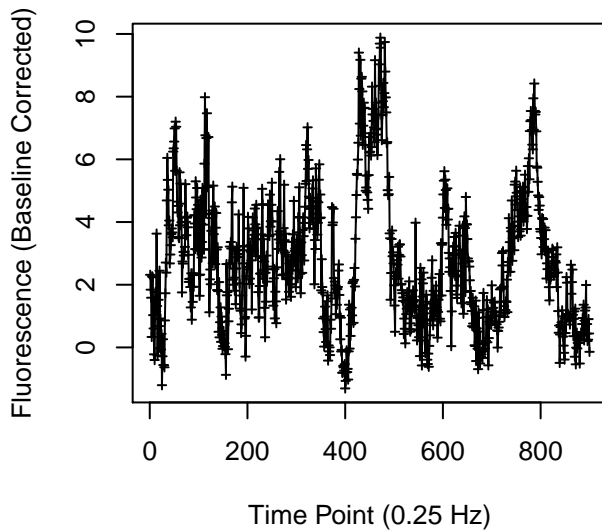

**Cell 697**

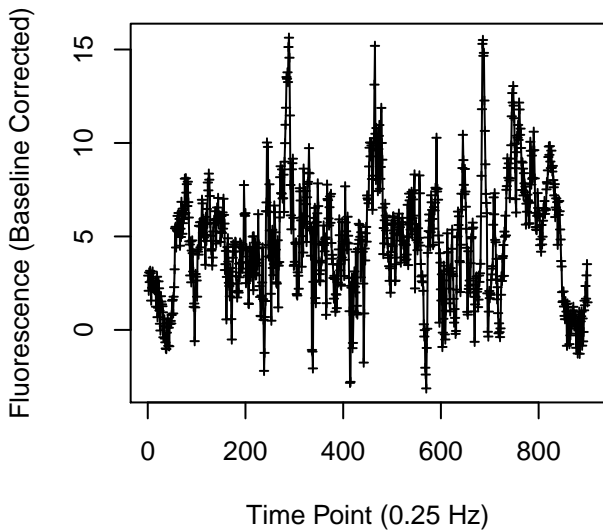

**Cell 698**

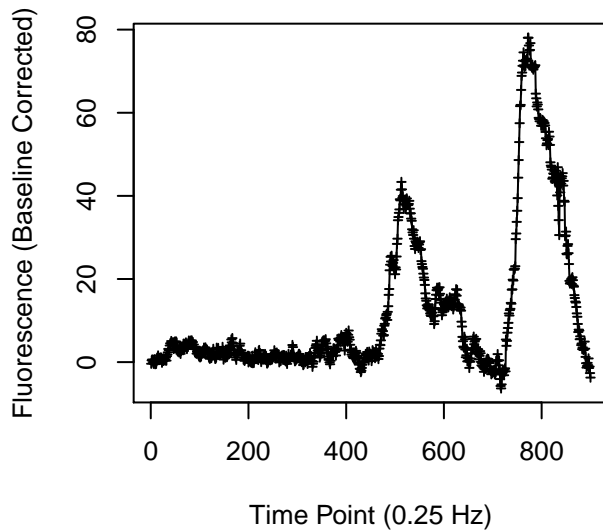

**Cell 699**

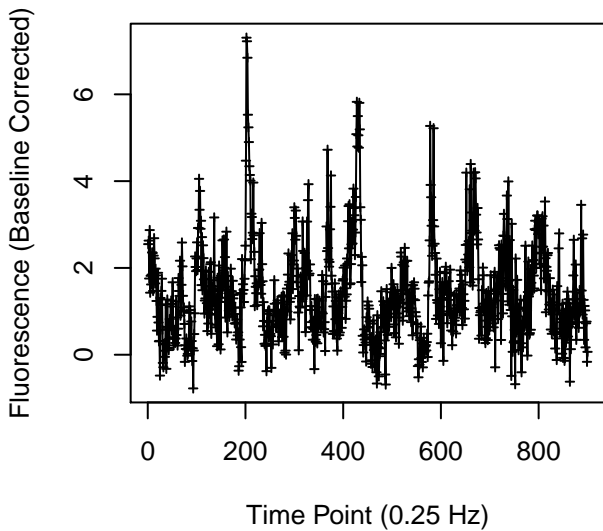

**Cell 700**

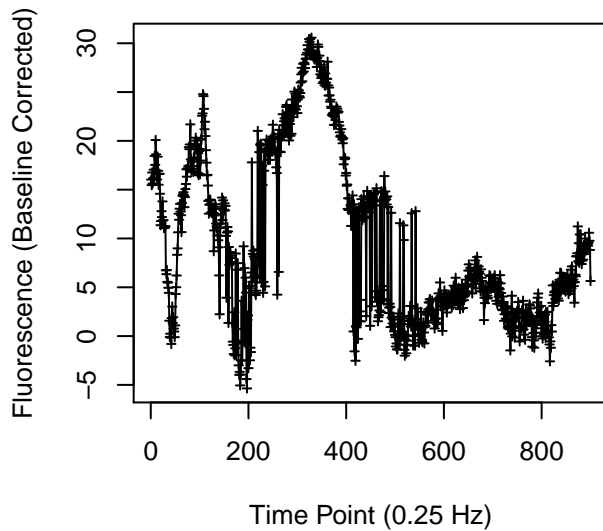

**Cell 701**

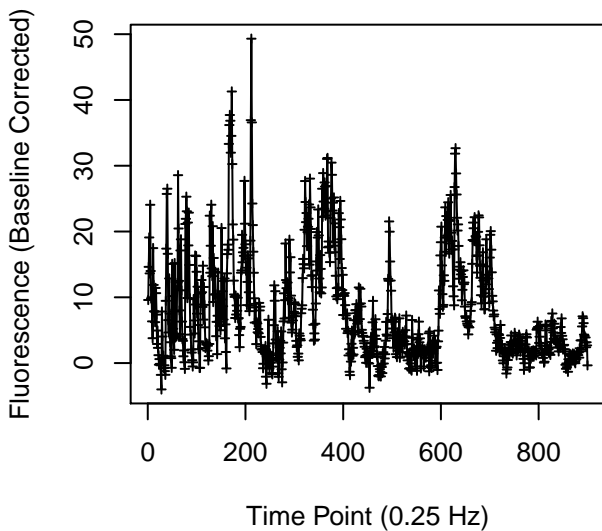

**Cell 702**

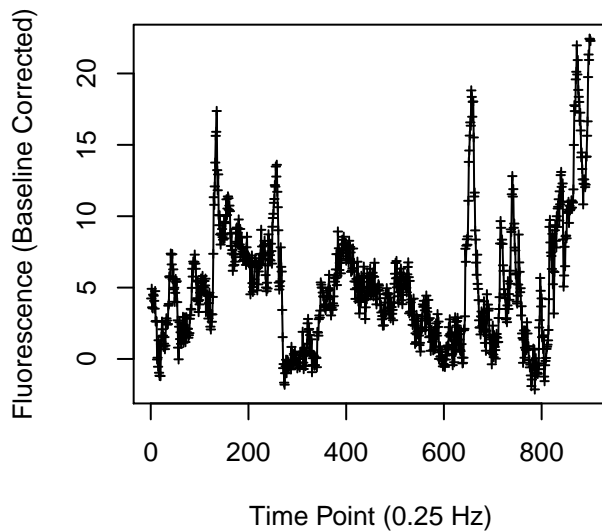

**Cell 703**

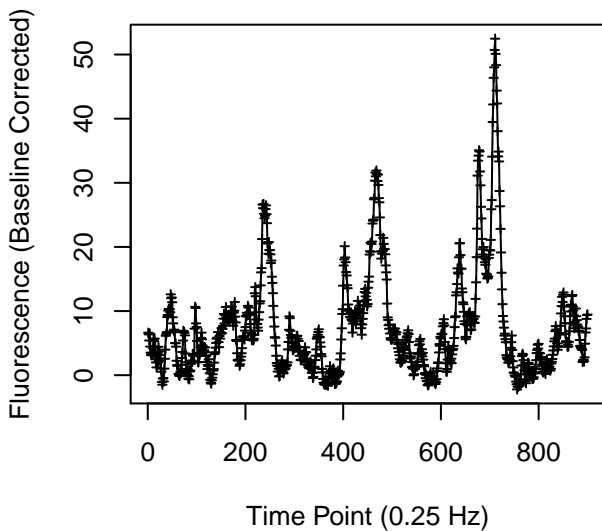

**Cell 704**

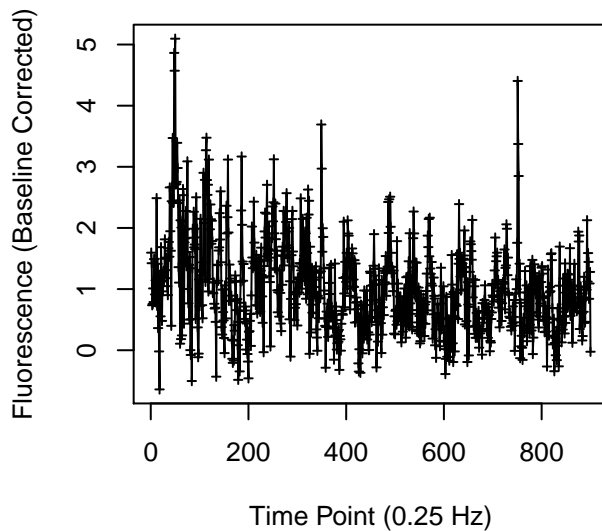

**Cell 705**

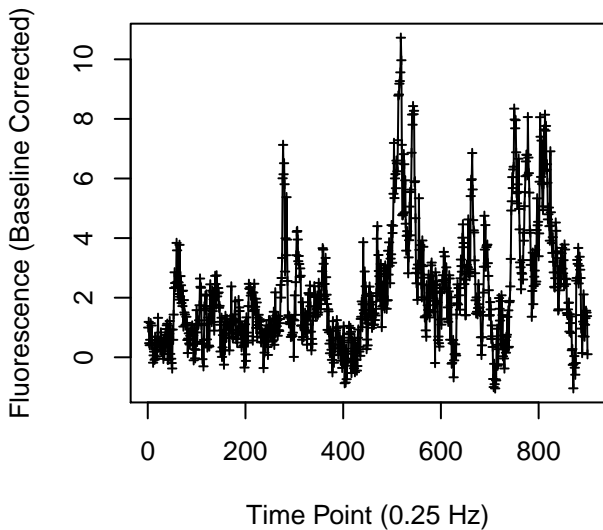

**Cell 706**

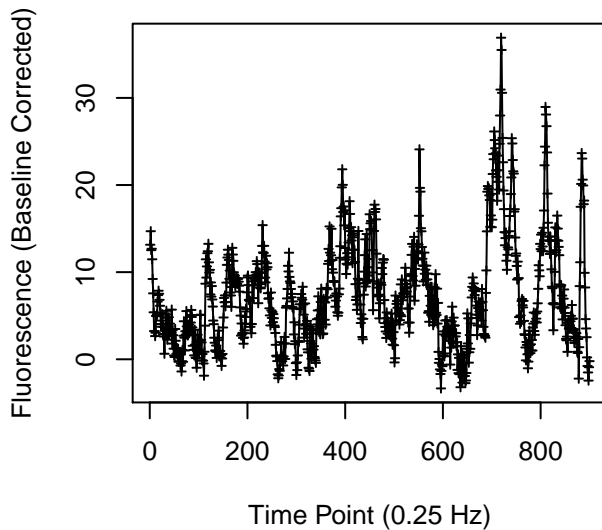

**Cell 707**

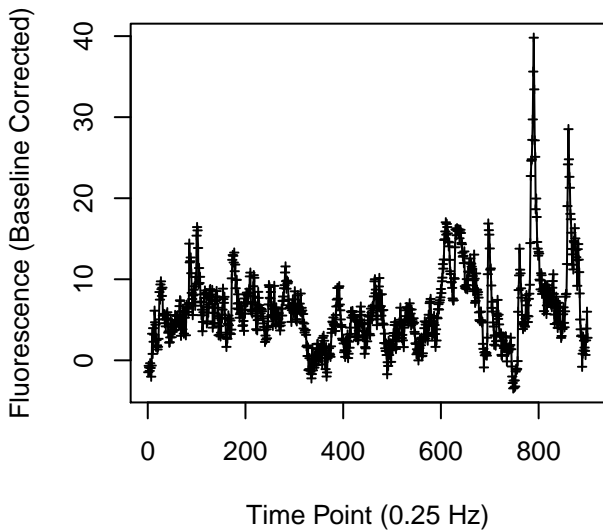

**Cell 708**

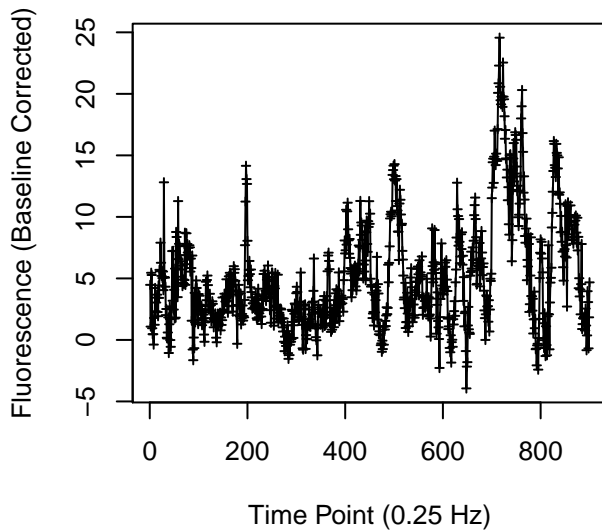

**Cell 709**

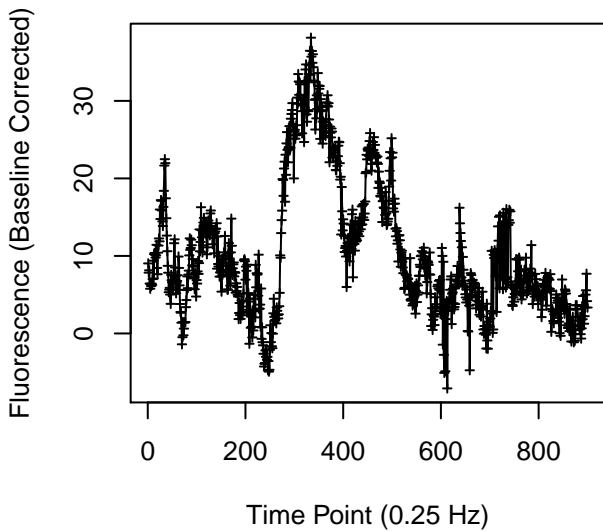

**Cell 710**

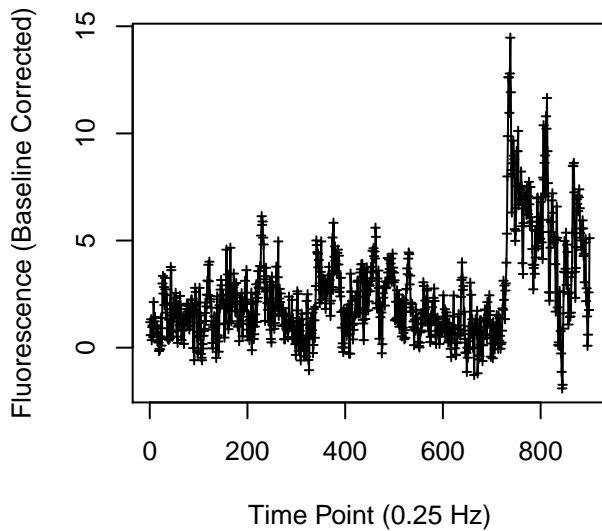

**Cell 711**

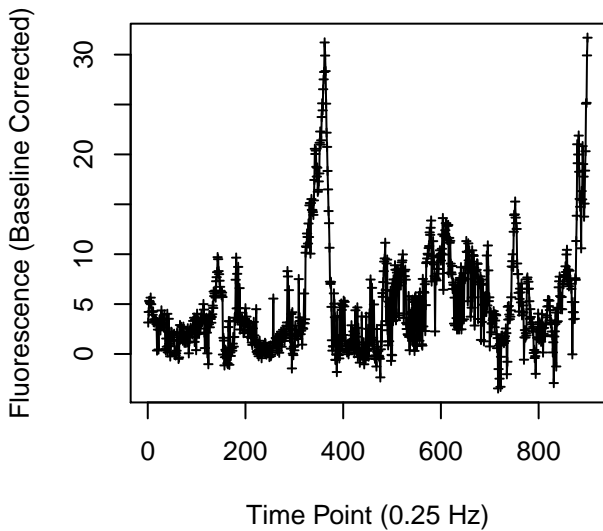

**Cell 712**

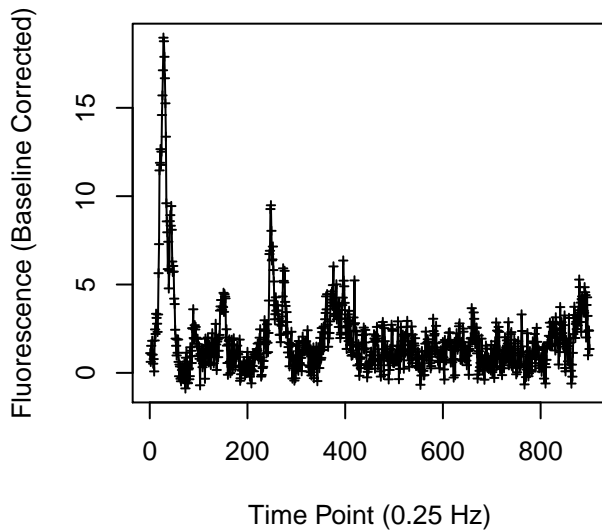

**Cell 713**

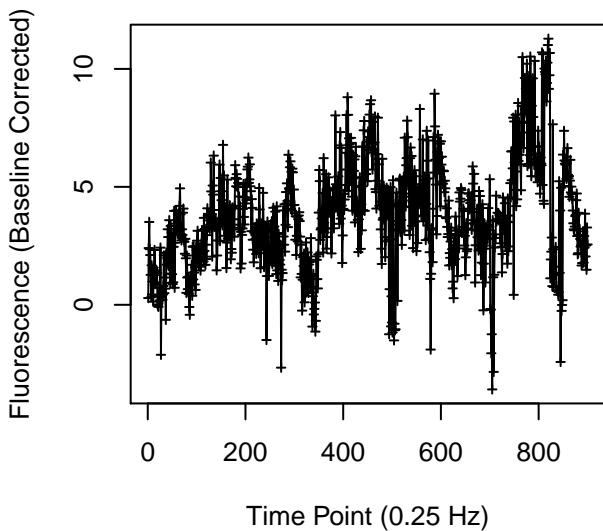

**Cell 714**

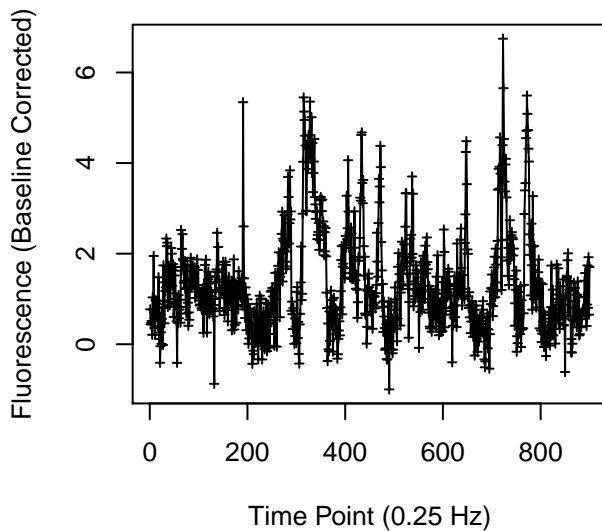

**Cell 715**

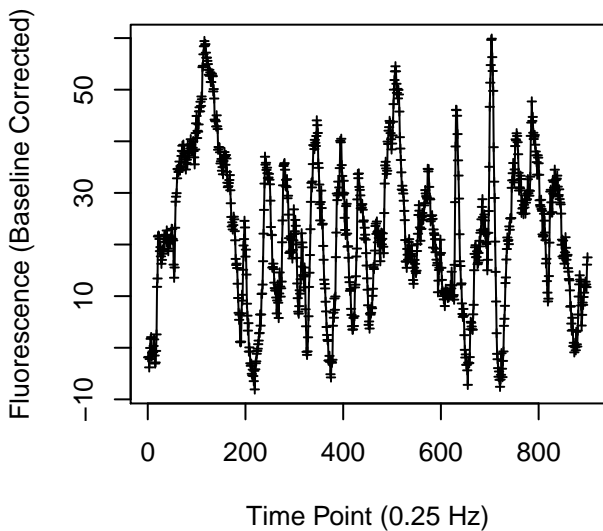

**Cell 716**

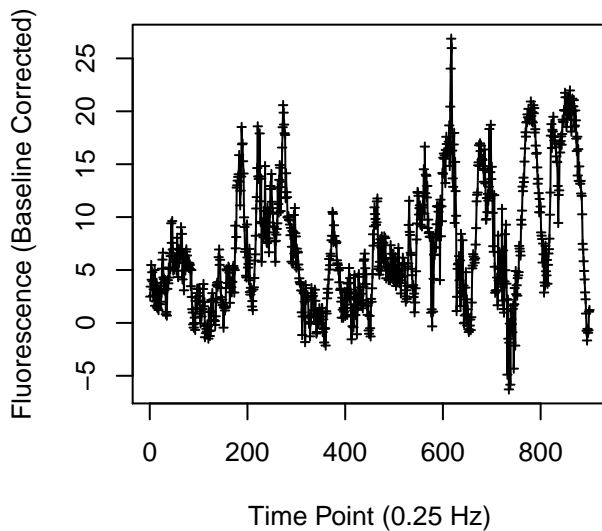

**Cell 717**

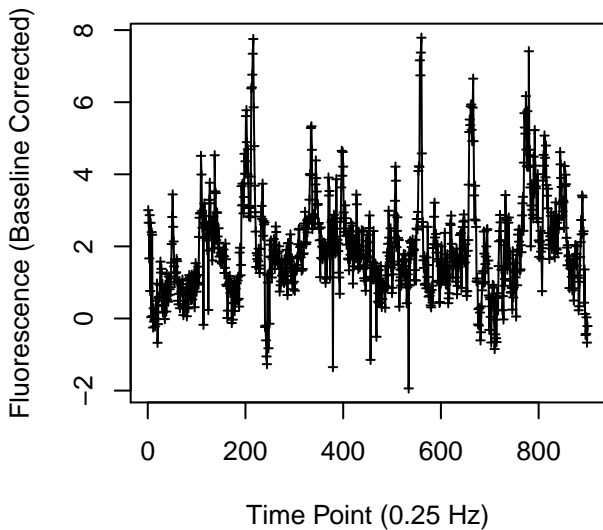

**Cell 718**

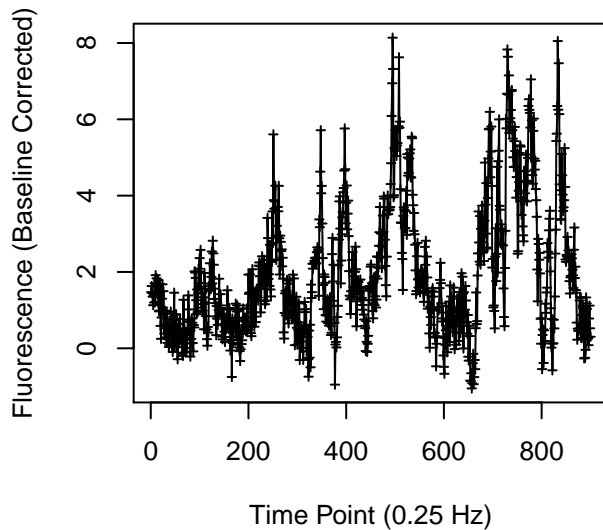

**Cell 719**

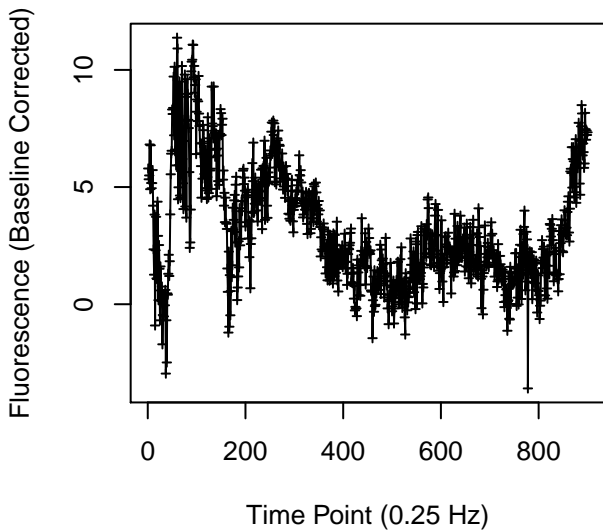

**Cell 720**

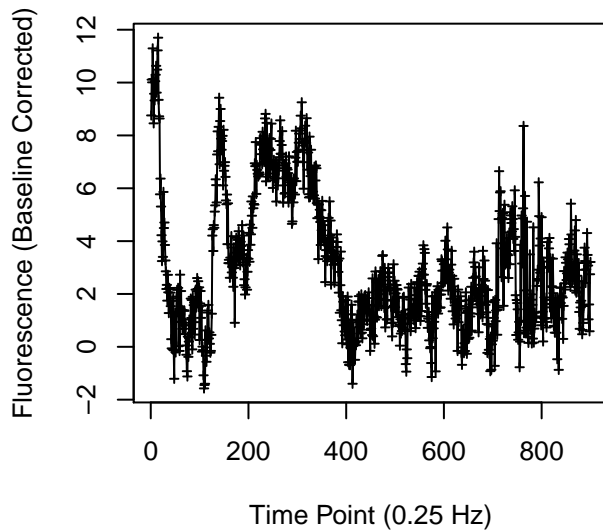

**Cell 721**

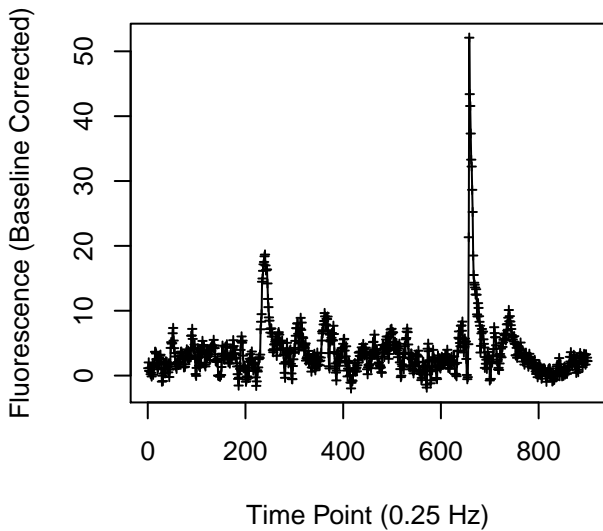

**Cell 722**

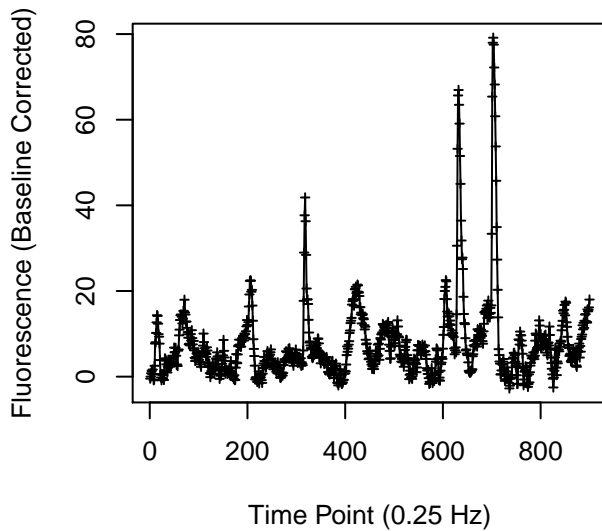

**Cell 723**

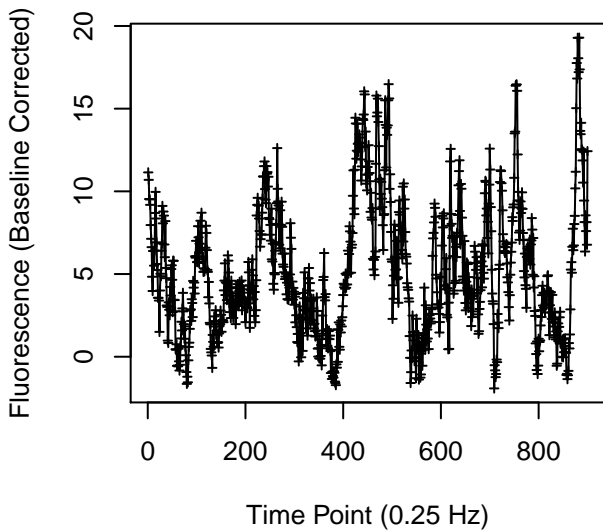

**Cell 724**

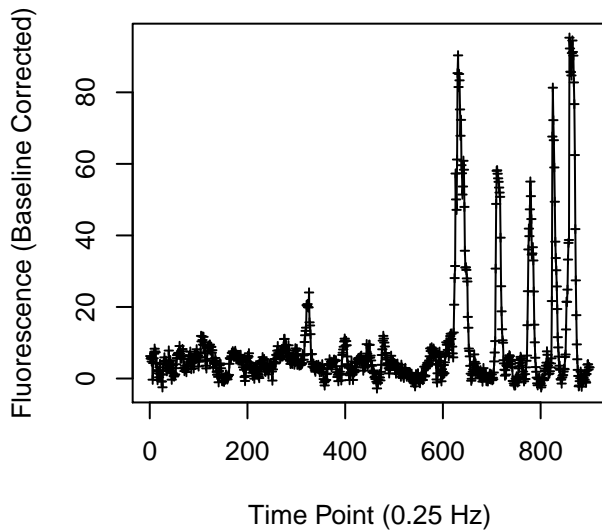

**Cell 725**

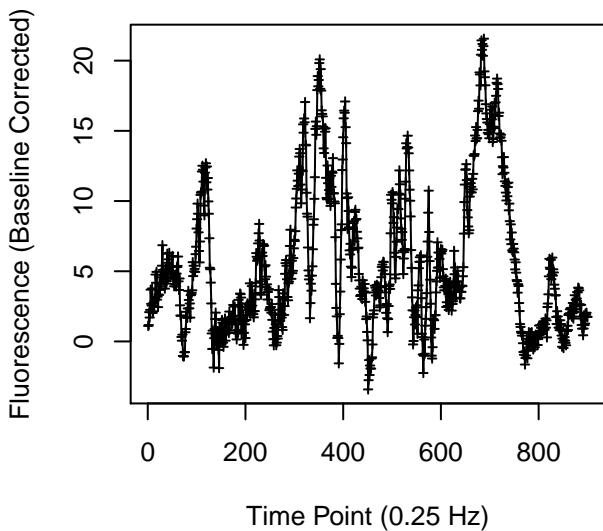

**Cell 726**

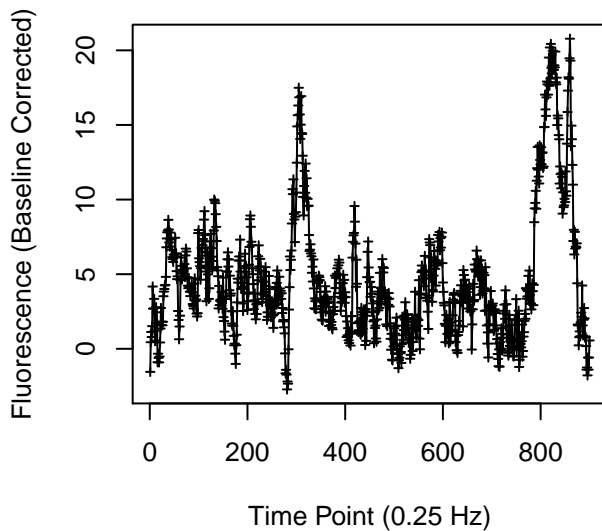

**Cell 727**

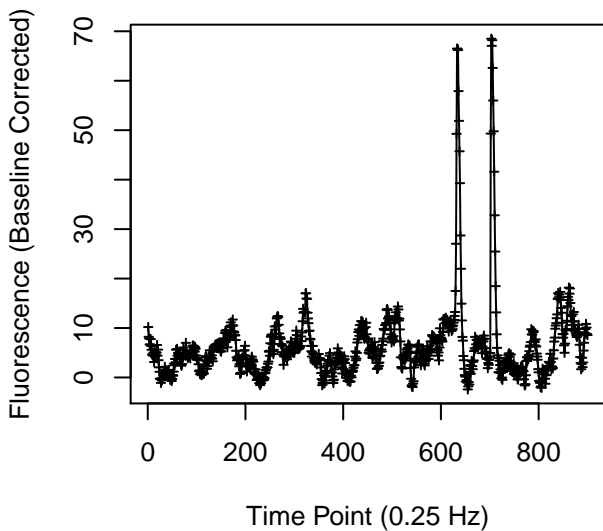

**Cell 728**

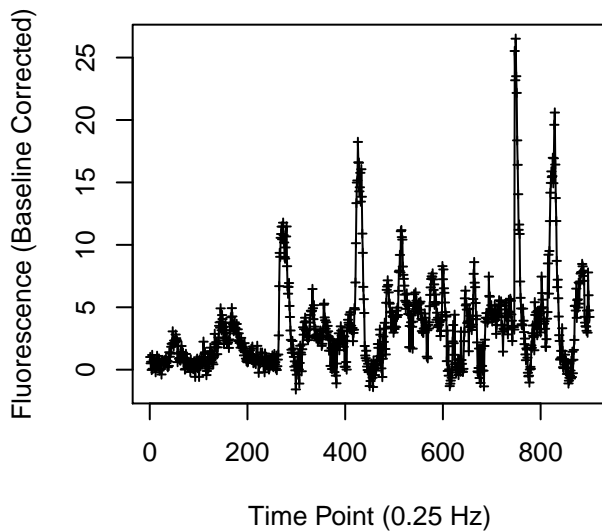

**Cell 729**

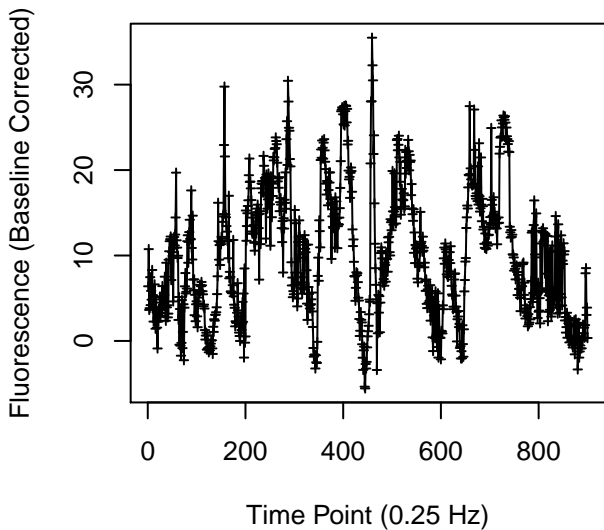

**Cell 730**

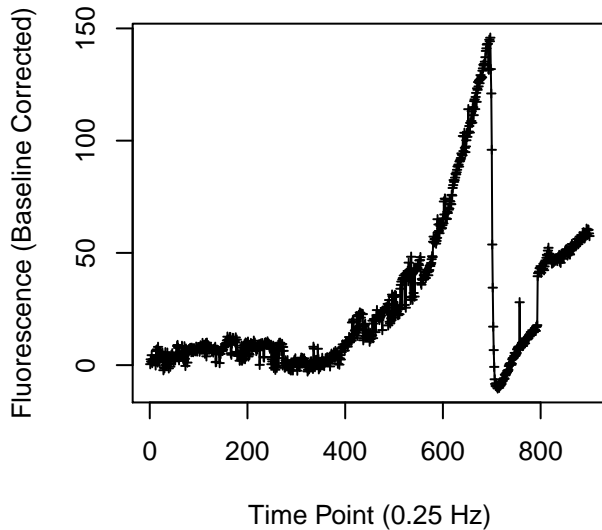

**Cell 731**

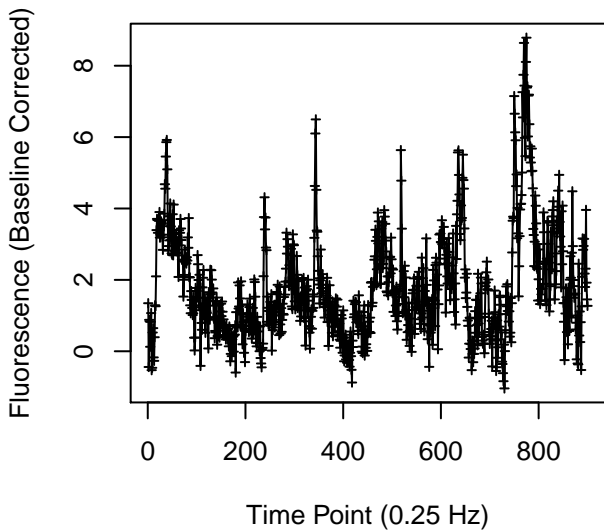

**Cell 732**

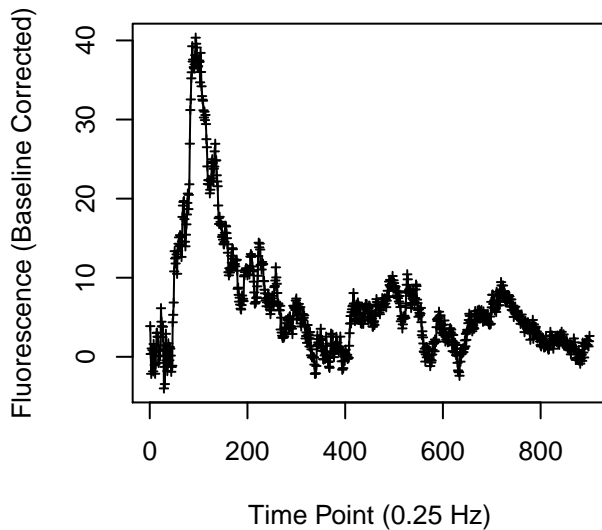

**Cell 733**

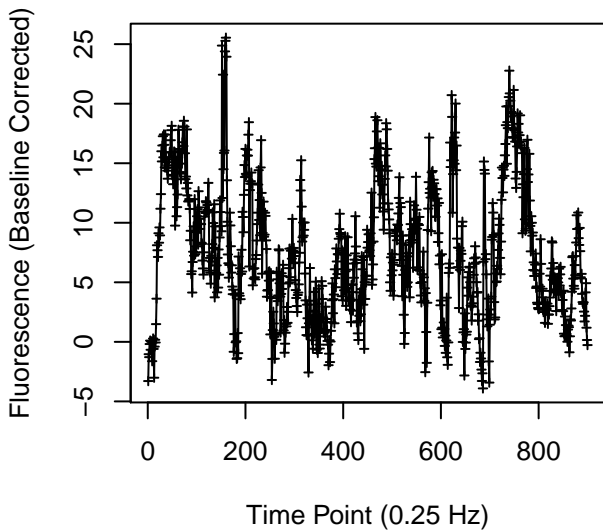

**Cell 734**

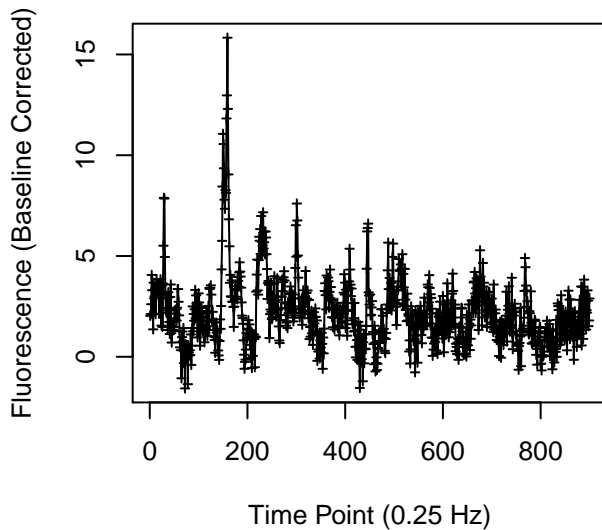

**Cell 735**

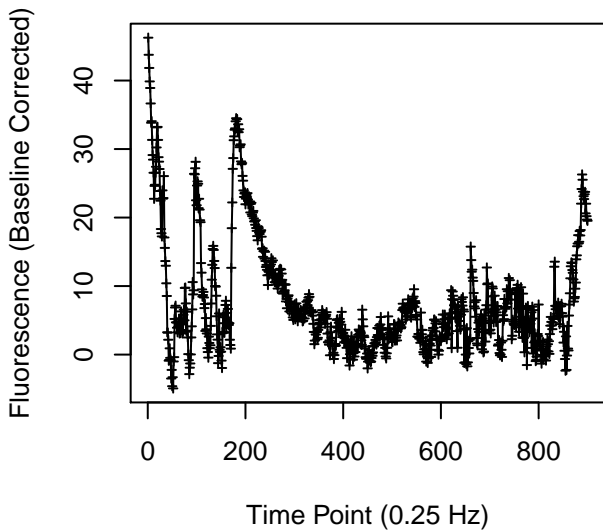

**Cell 736**

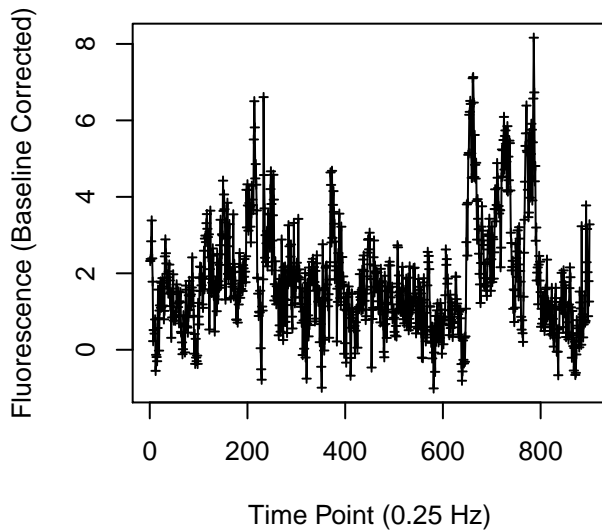

**Cell 737**

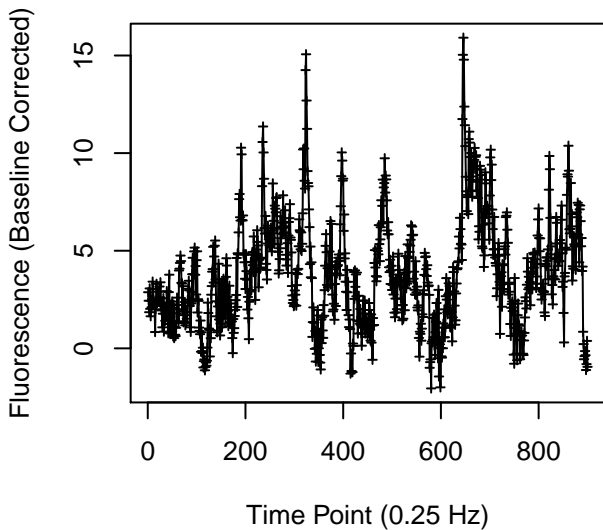

**Cell 738**

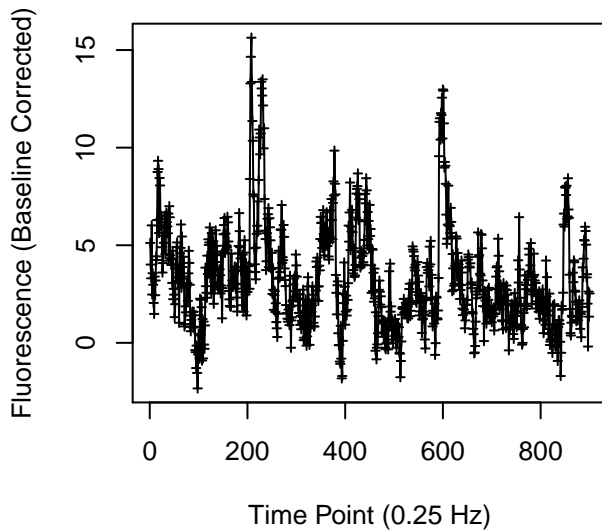

**Cell 739**

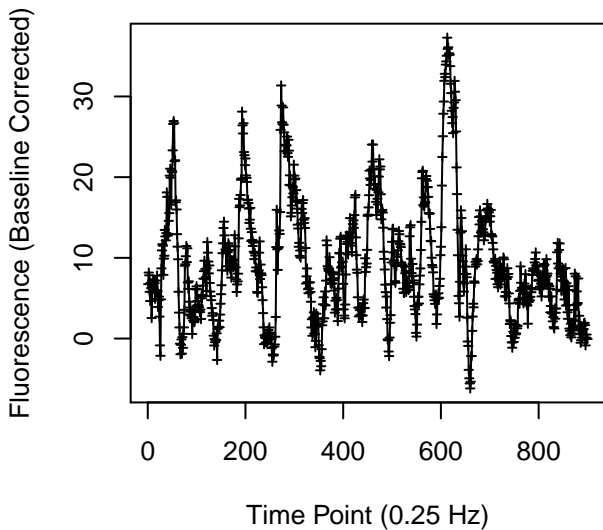

**Cell 740**

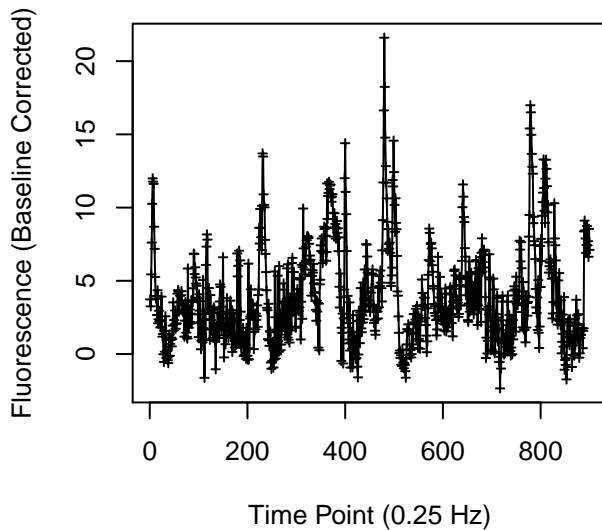

**Cell 741**

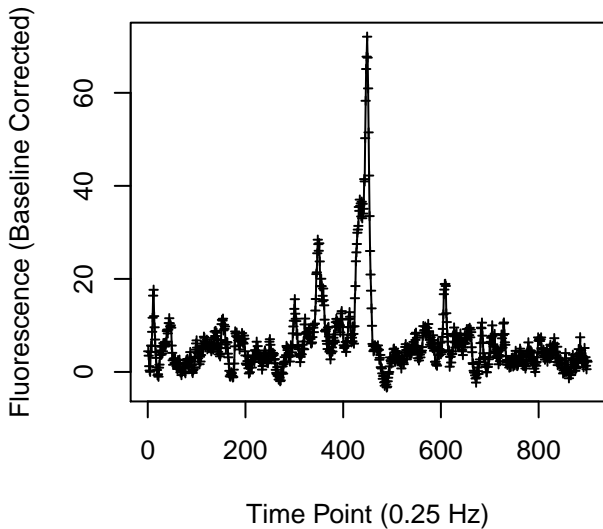

**Cell 742**

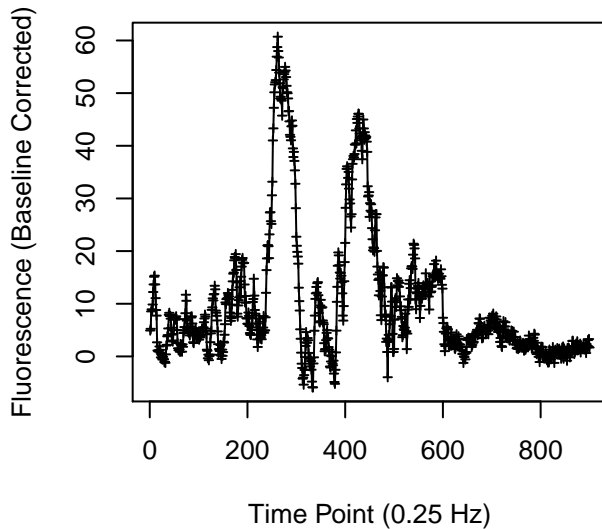

**Cell 743**

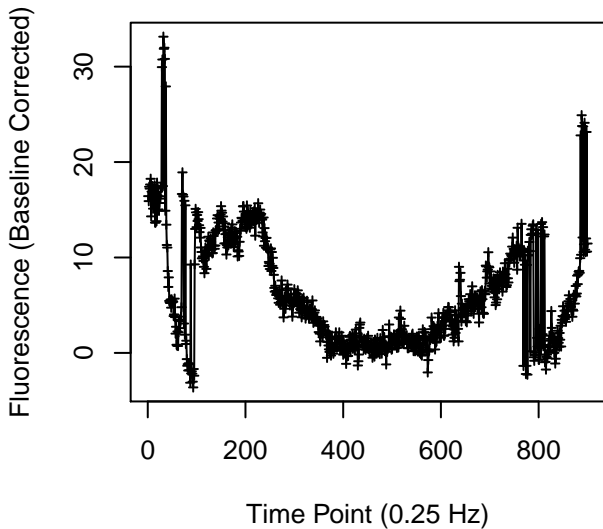

**Cell 744**

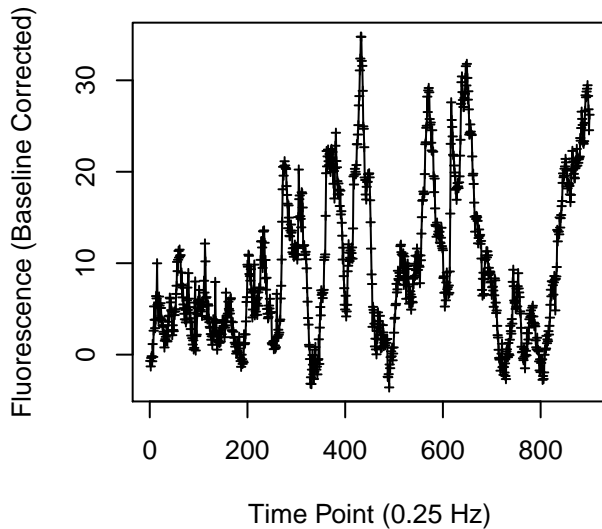

**Cell 745**

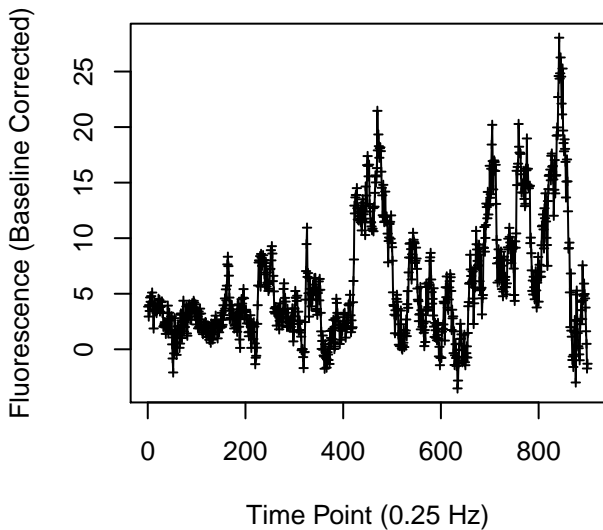

**Cell 746**

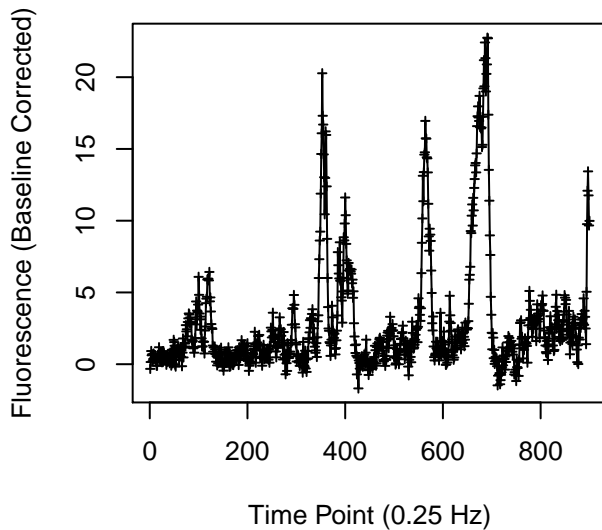

**Cell 747**

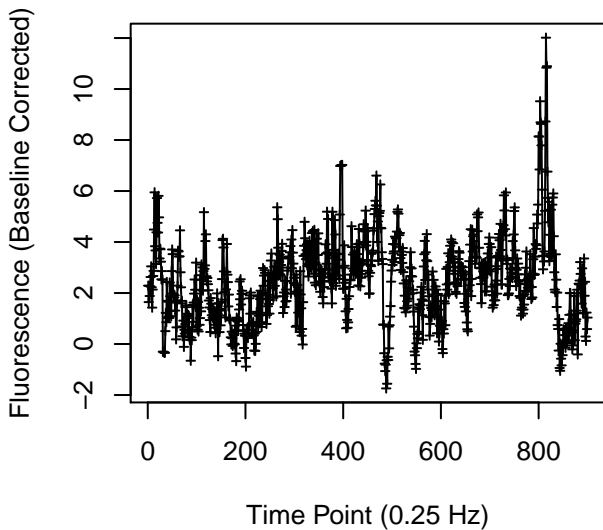

**Cell 748**

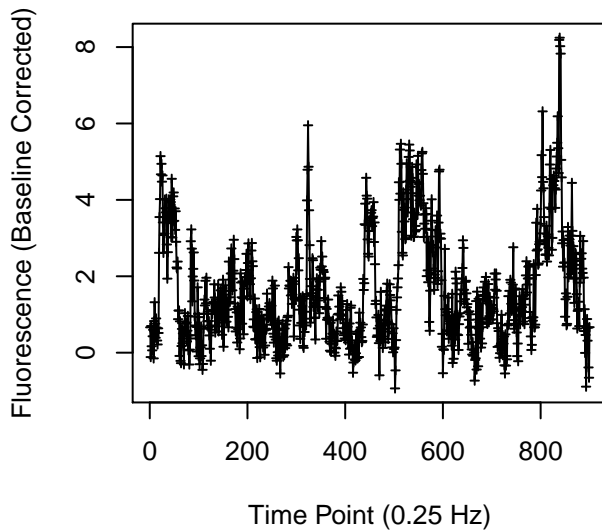

**Cell 749**

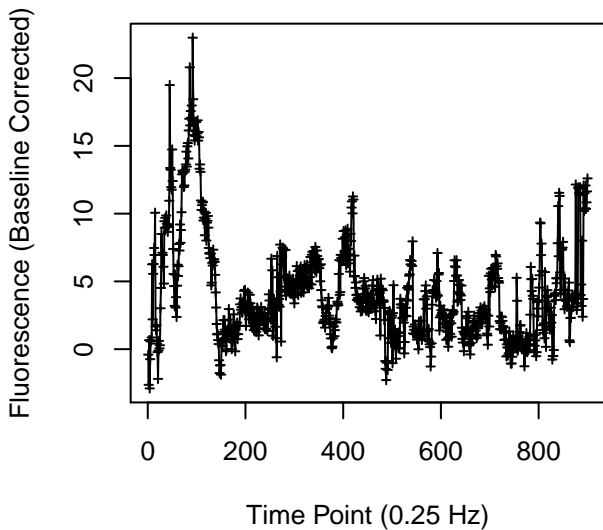

**Cell 750**

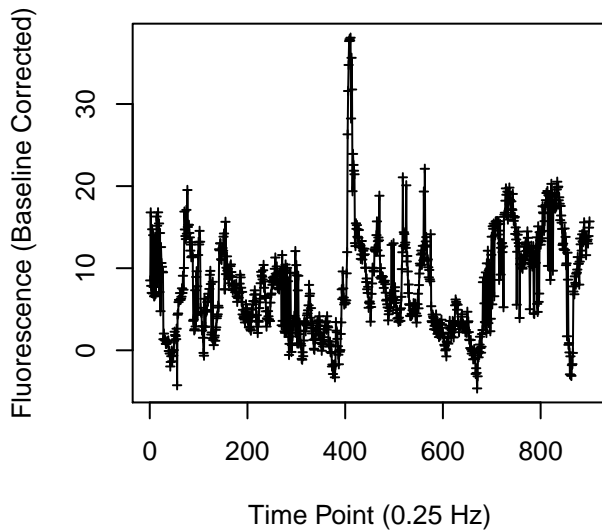

**Cell 751**

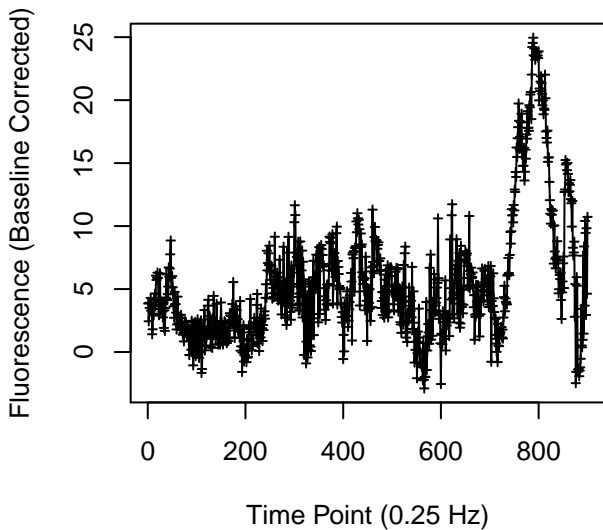

**Cell 752**

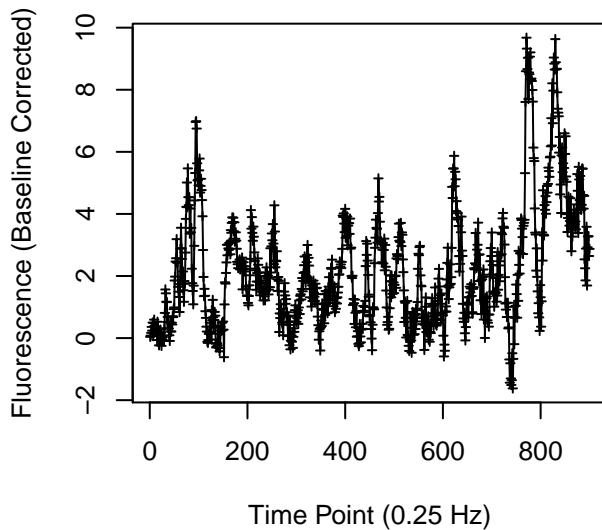

**Cell 753**

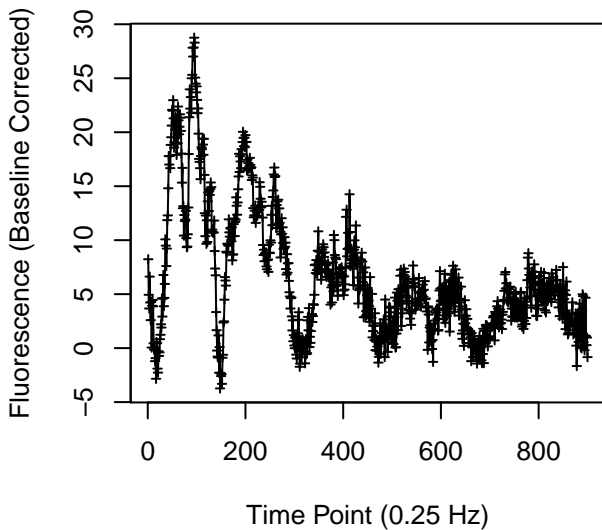

**Cell 754**

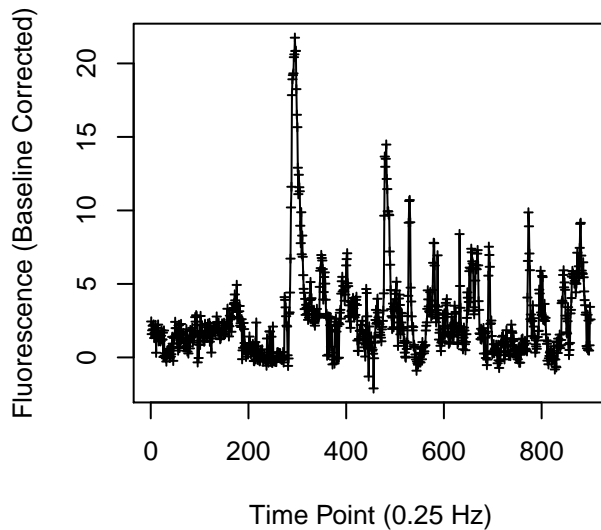

**Cell 755**

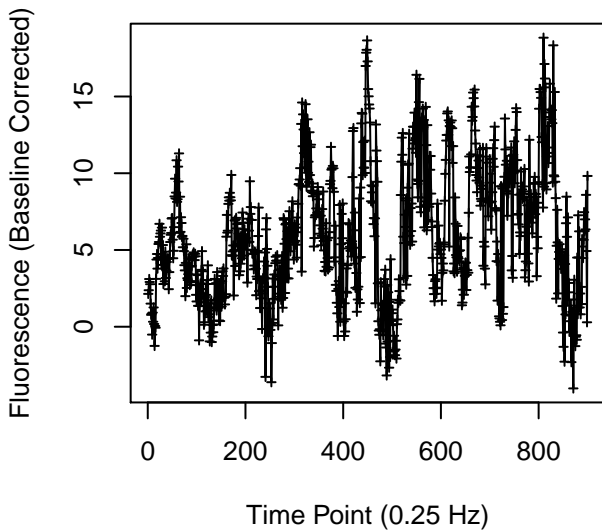

**Cell 756**

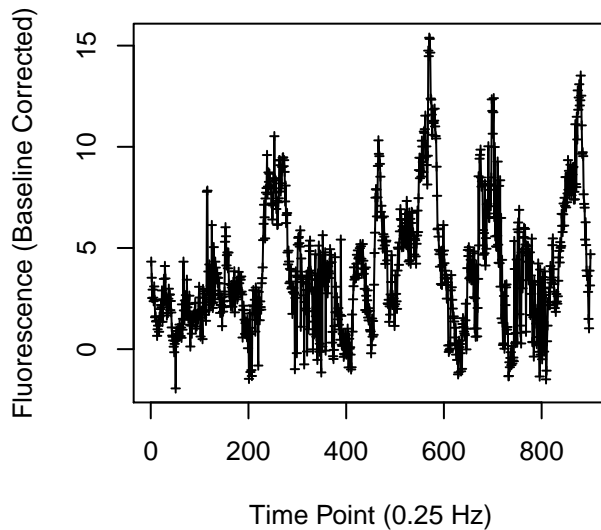

**Cell 757**

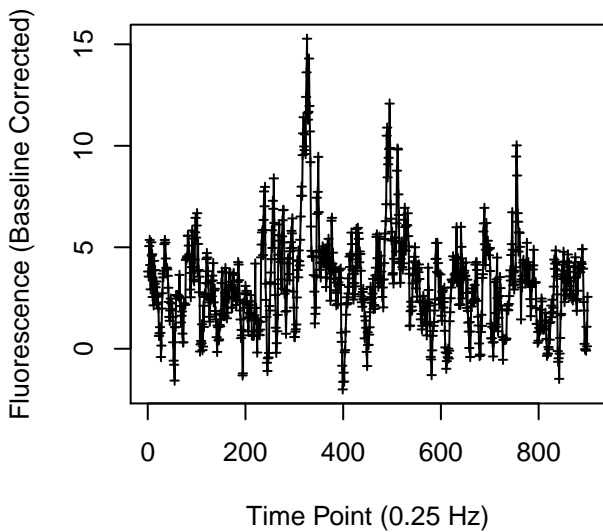

Supplement: S3 File — (PDF) [file pone.0168342.s010.pdf]
