# Supplementary material for: A Markovian Entropy Measure for the Analysis of Calcium Activity Time Series
Source: PLOS journal article supplement (doi:10.1371/journal.pone.0168342), 2016-12-15

**Cell 1**

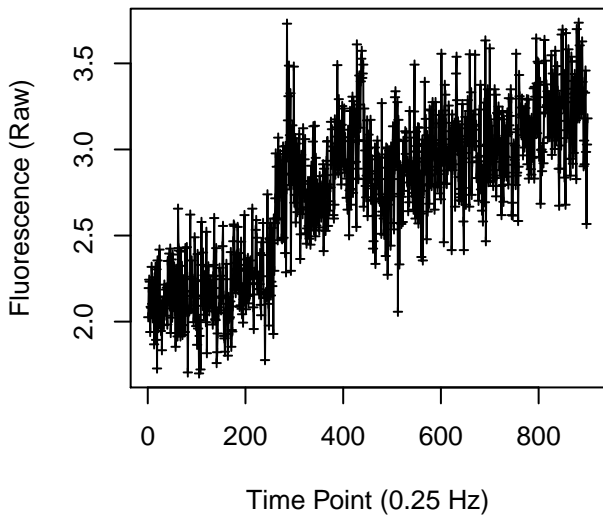

**Cell 2**

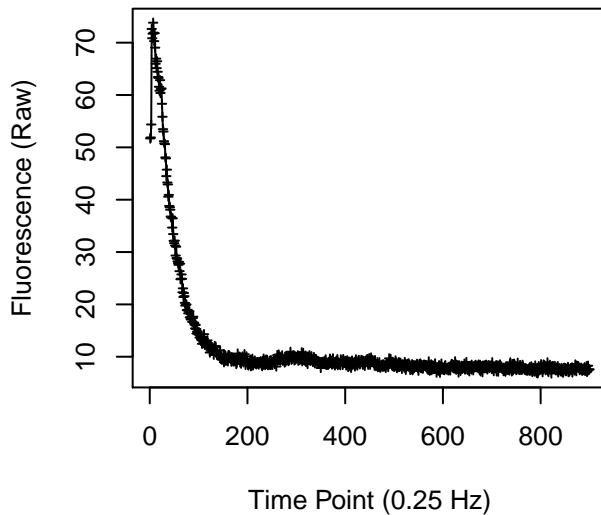

**Cell 3**

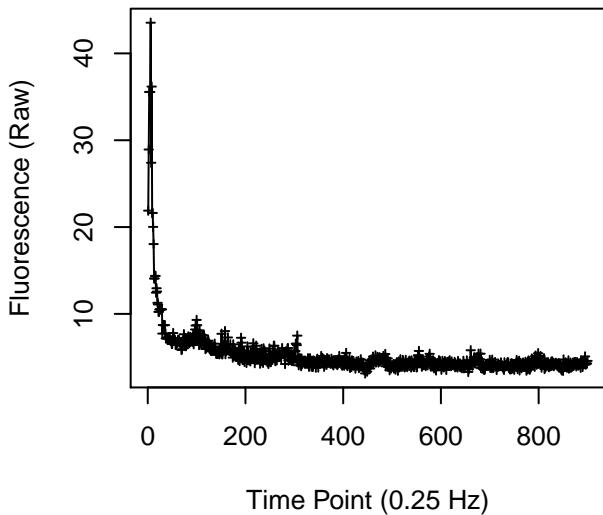

**Cell 4**

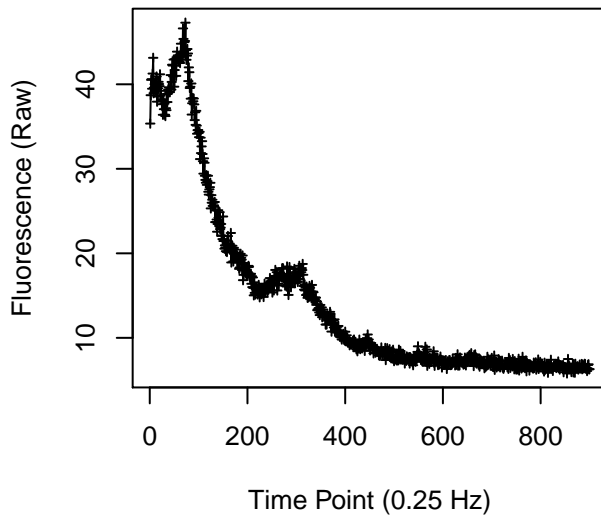

**Cell 5**

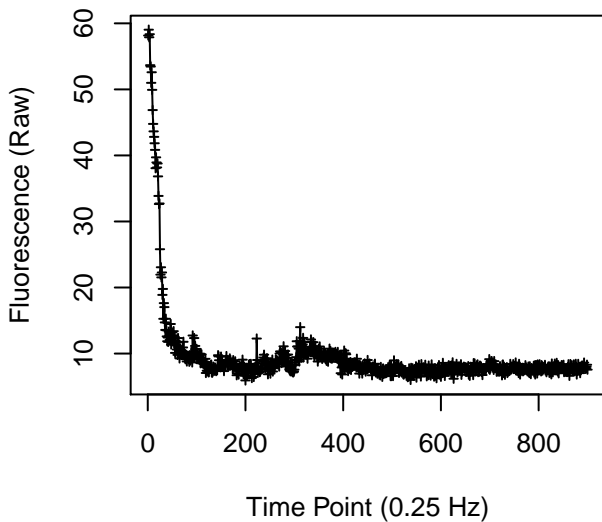

**Cell 6**

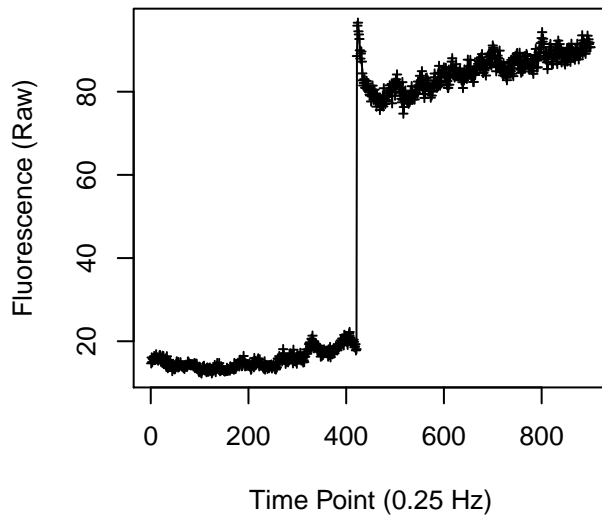

**Cell 7**

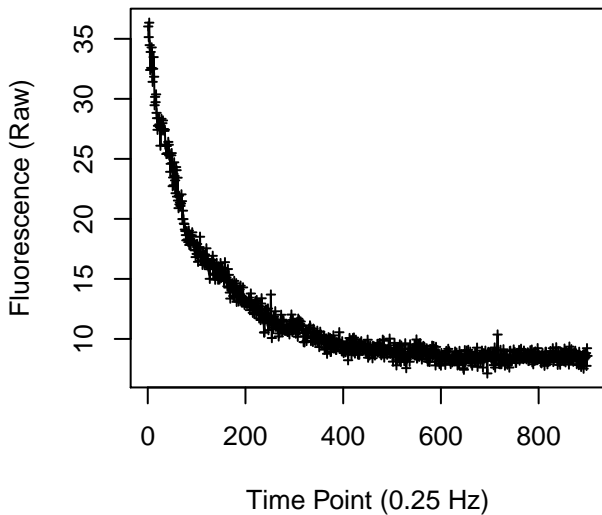

**Cell 8**

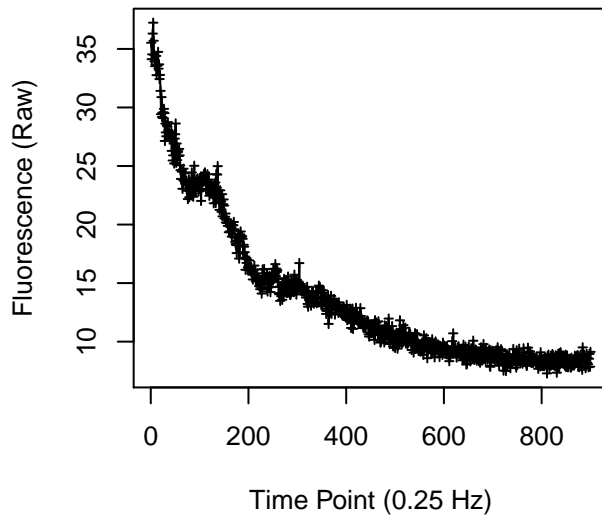



**Cell 9**

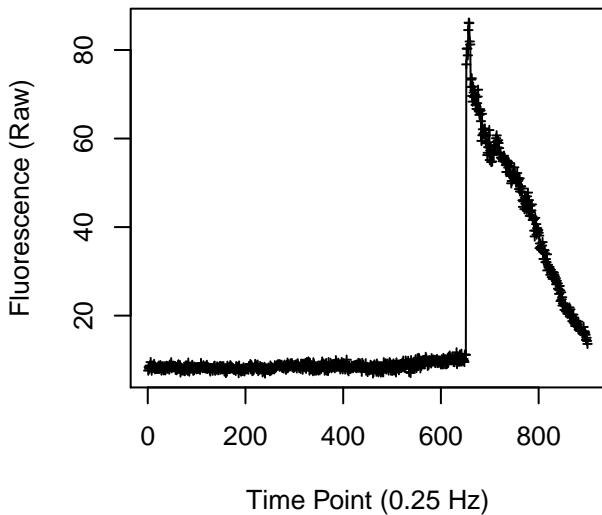

**Cell 10**

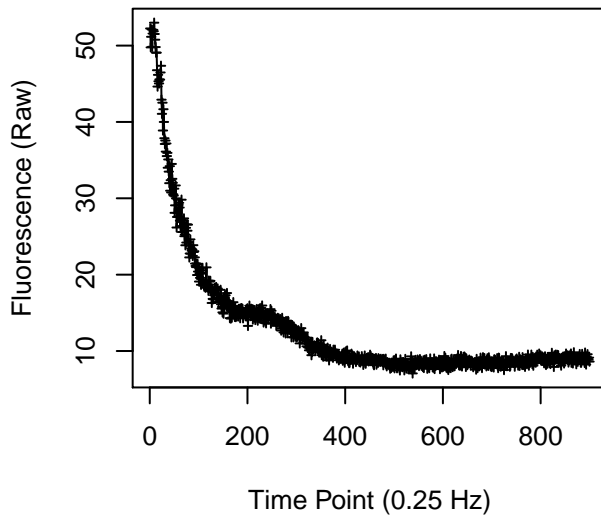

**Cell 11**

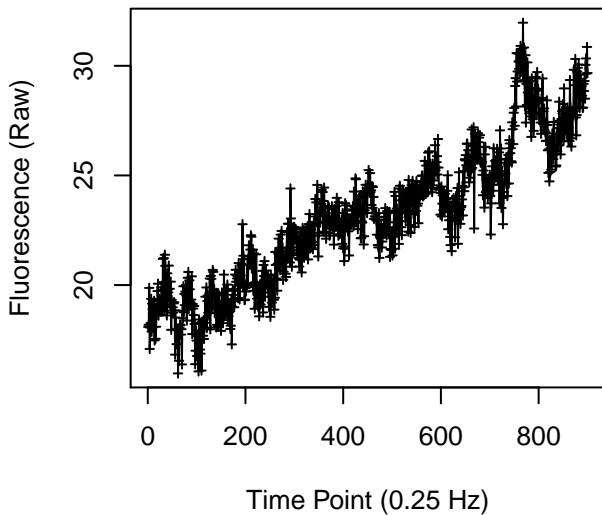

**Cell 12**

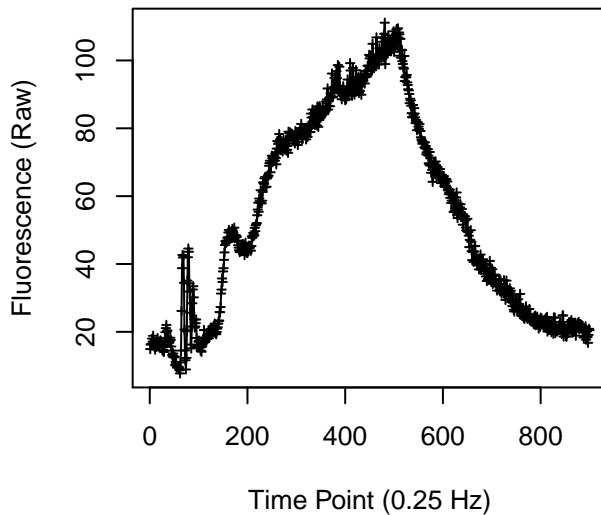

**Cell 13**

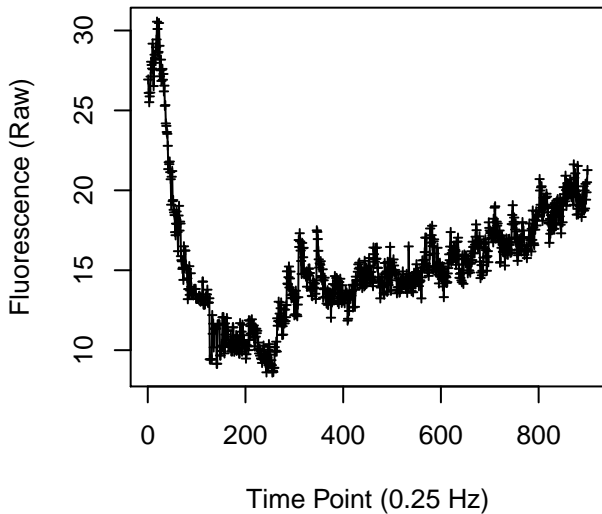

**Cell 14**

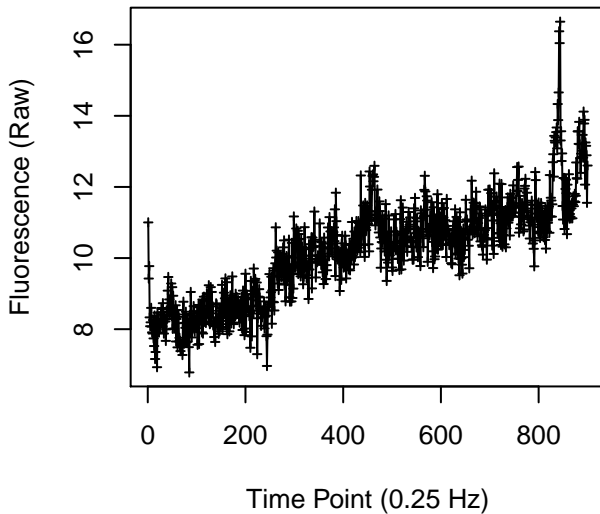

**Cell 15**

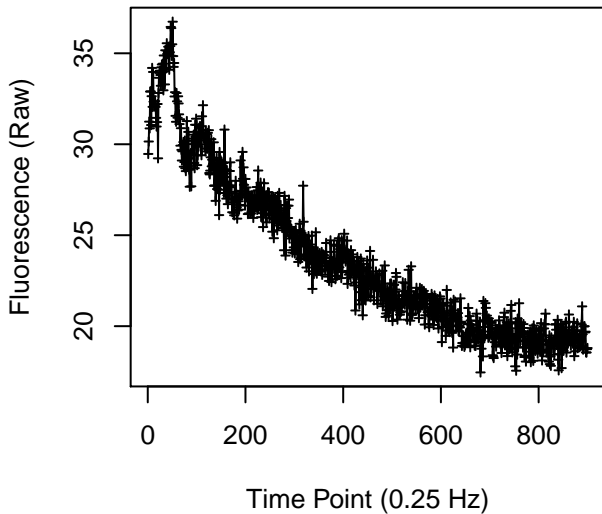

**Cell 16**

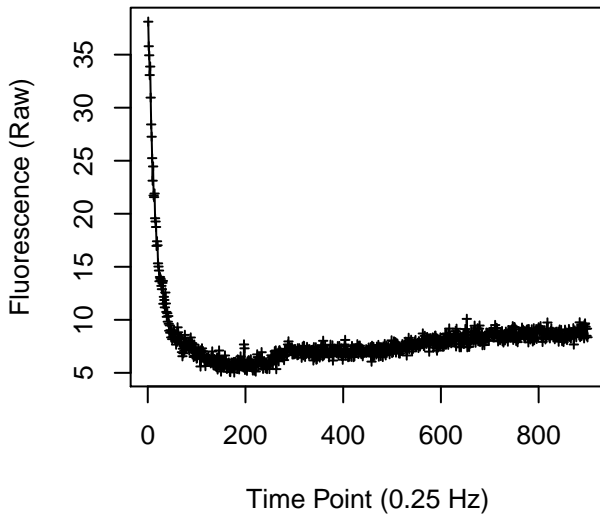

**Cell 17**

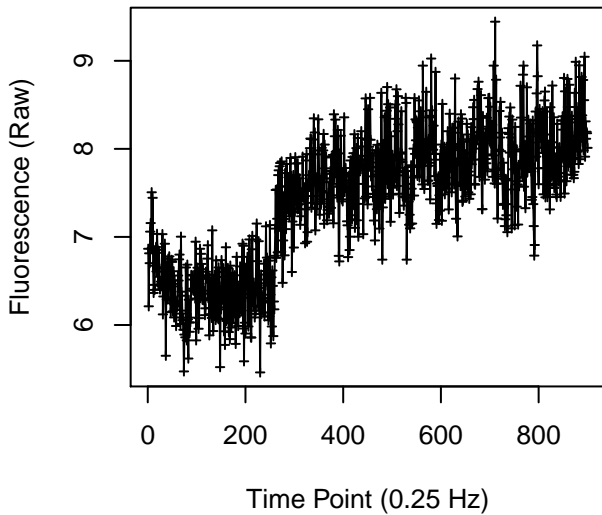

**Cell 18**

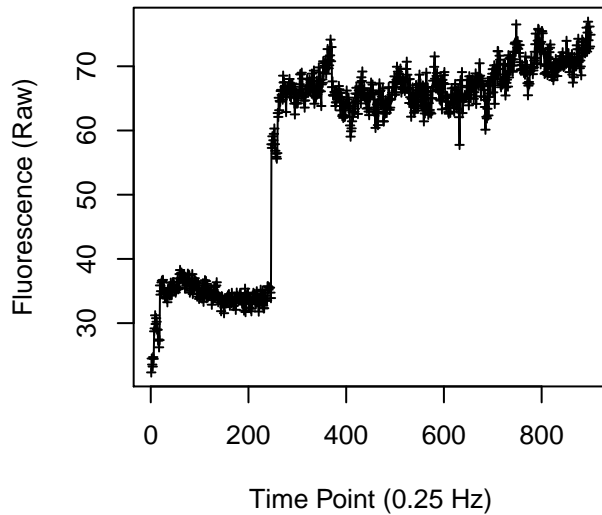

**Cell 19**

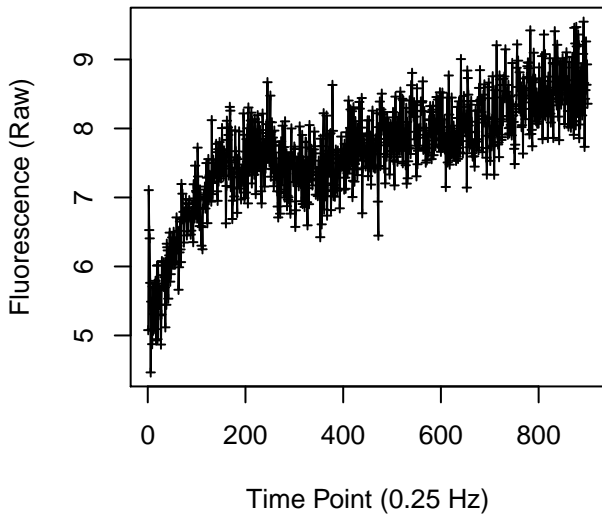

**Cell 20**

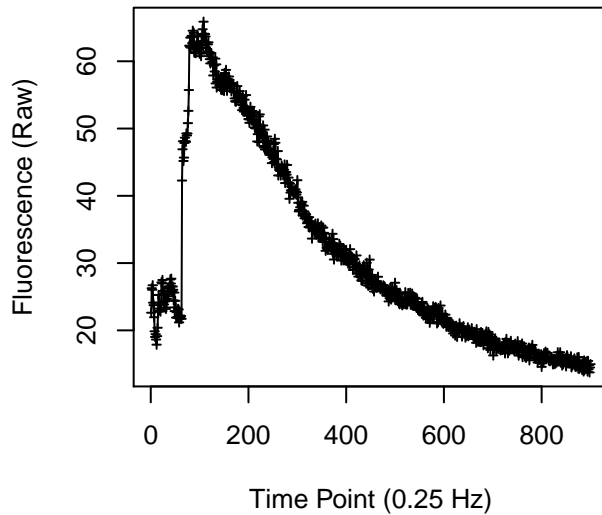

**Cell 21**

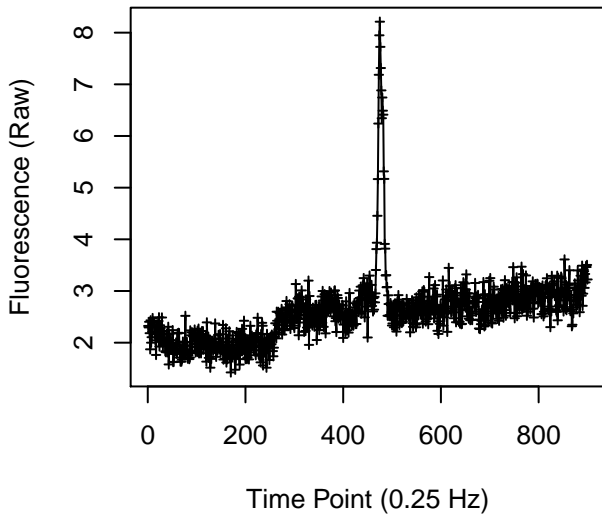

**Cell 22**

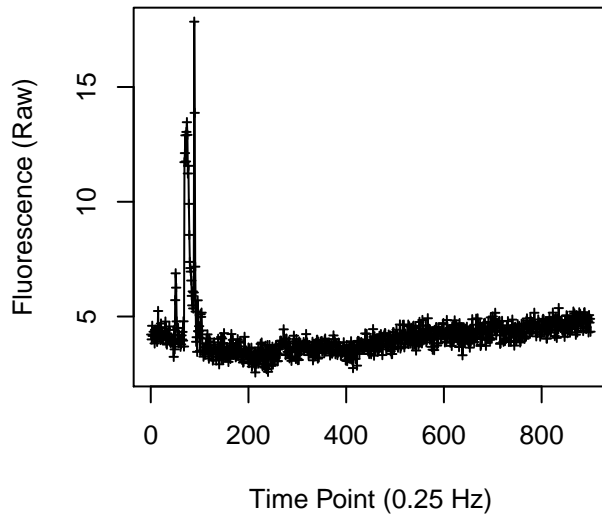

**Cell 23**

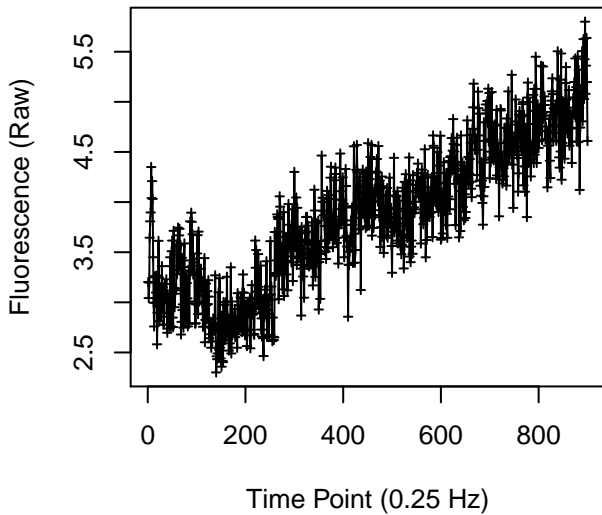

**Cell 24**

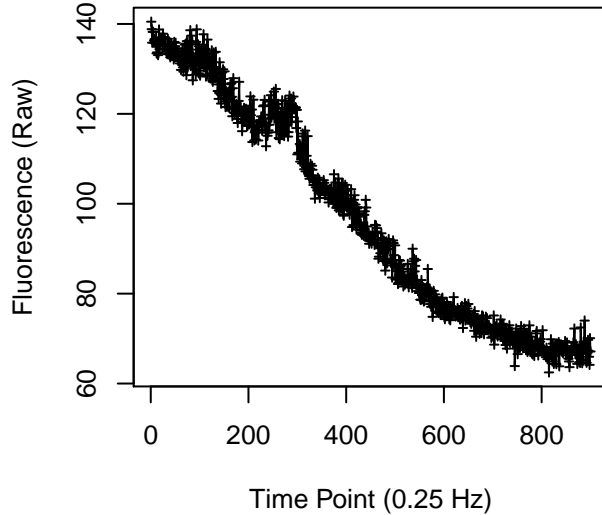

**Cell 25**

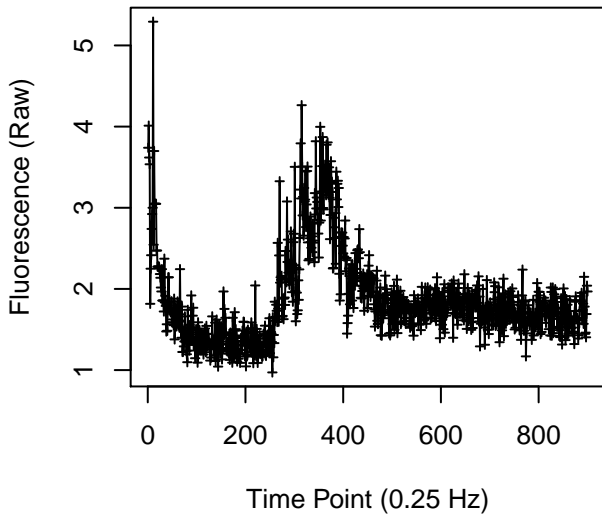

**Cell 26**

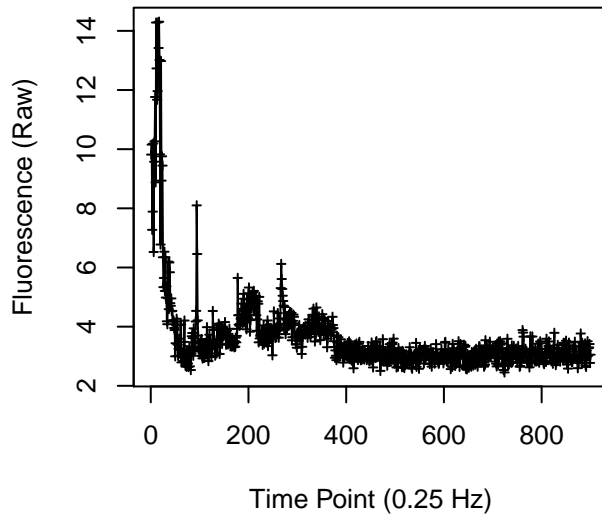

**Cell 27**

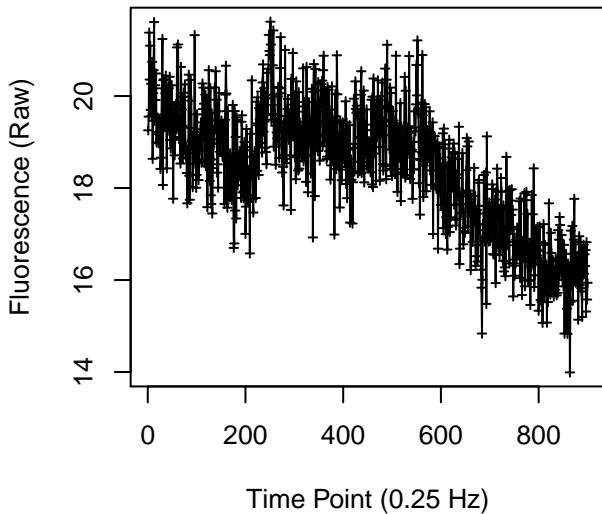

**Cell 28**

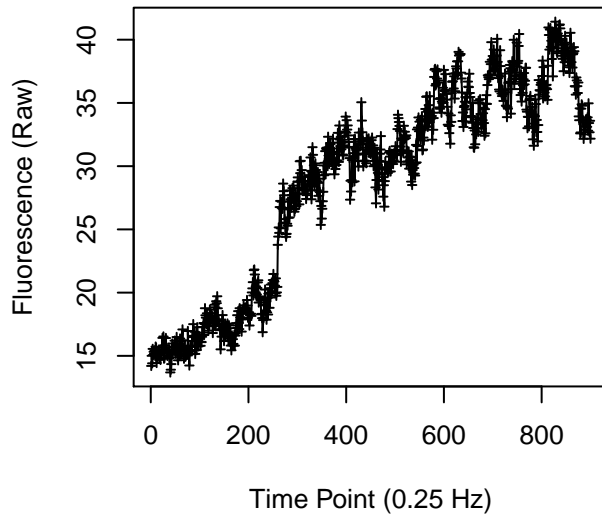

**Cell 29**

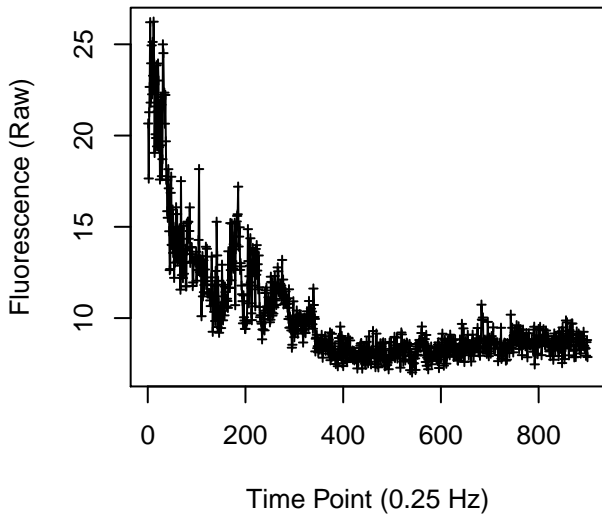

**Cell 30**

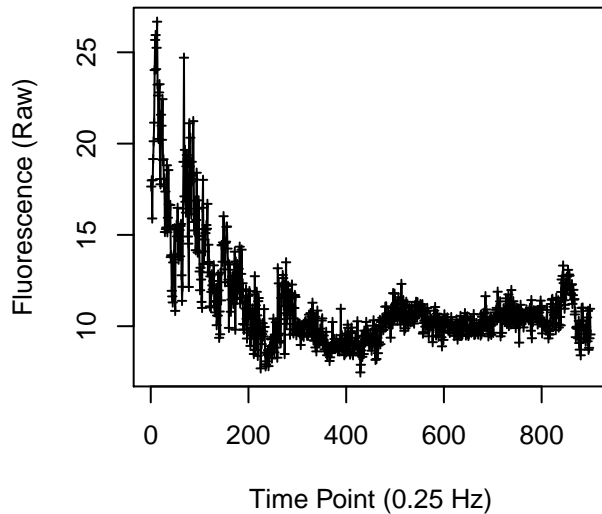

**Cell 31**

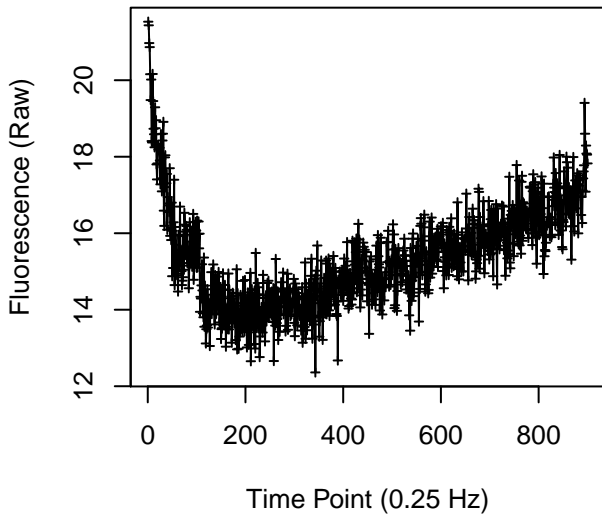

**Cell 32**

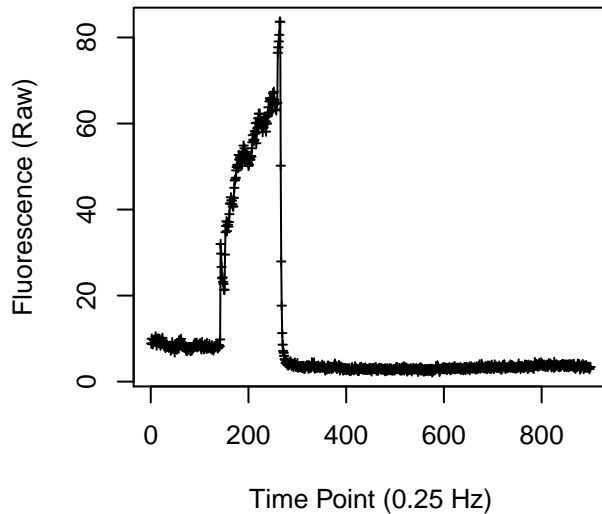

**Cell 33**

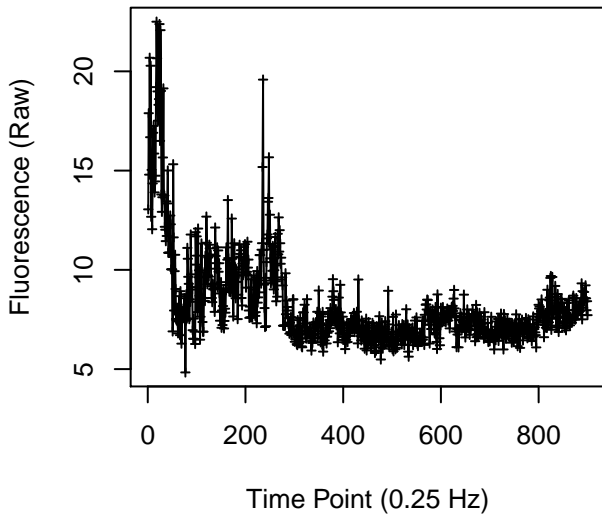

**Cell 34**

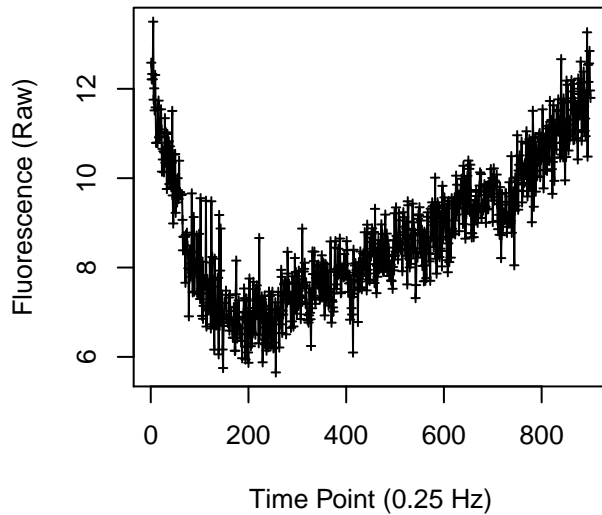

**Cell 35**

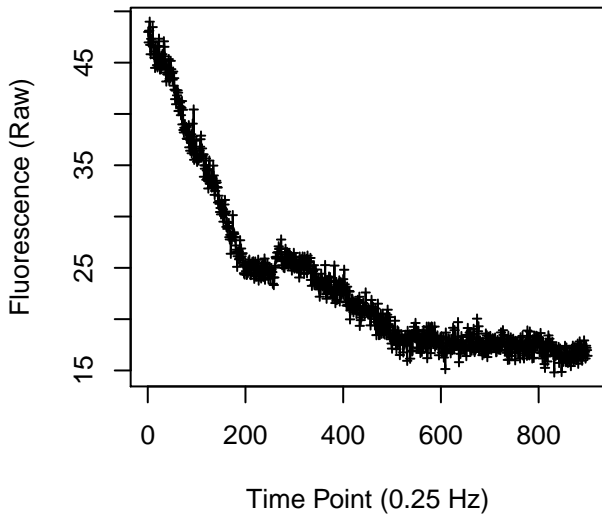

**Cell 36**

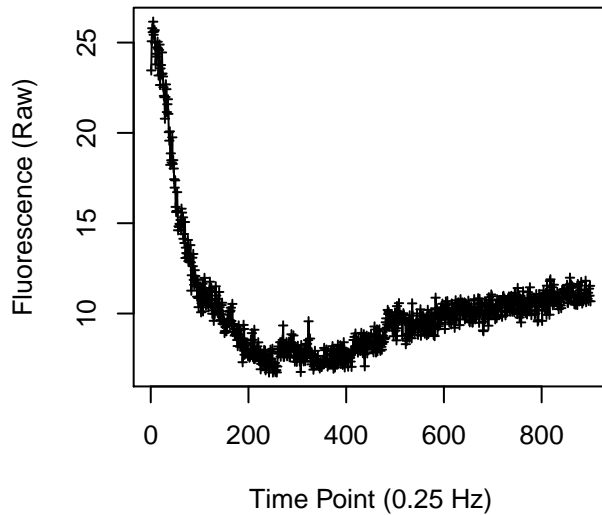

**Cell 37**

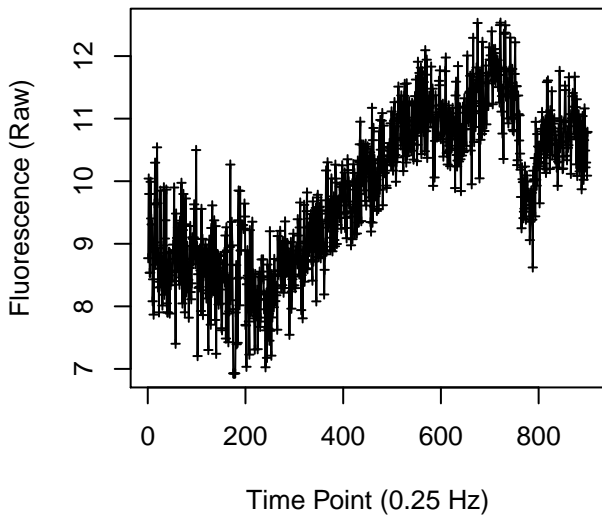

**Cell 38**

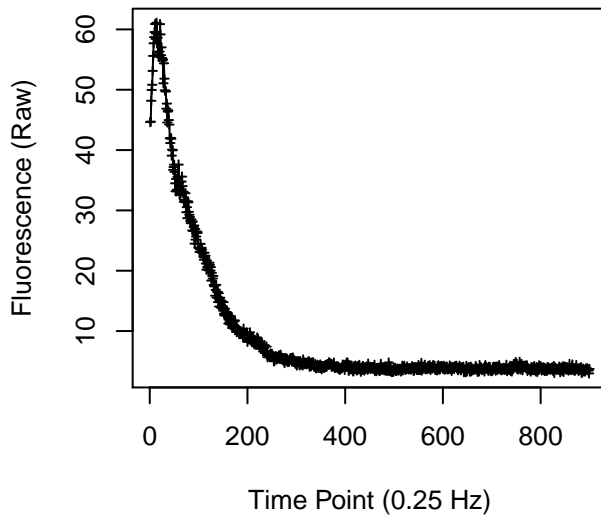

**Cell 39**

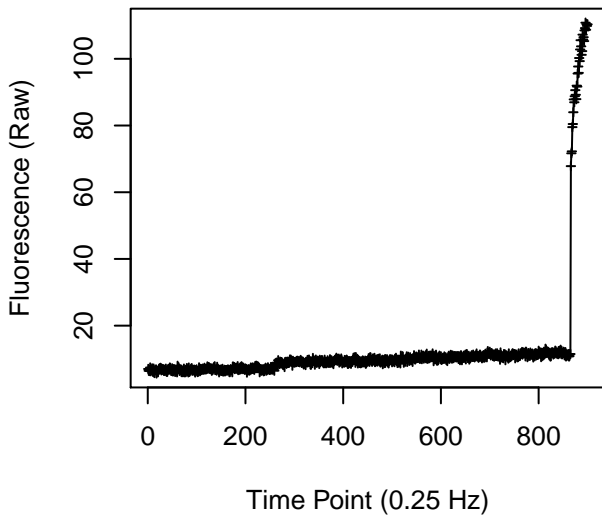

**Cell 40**

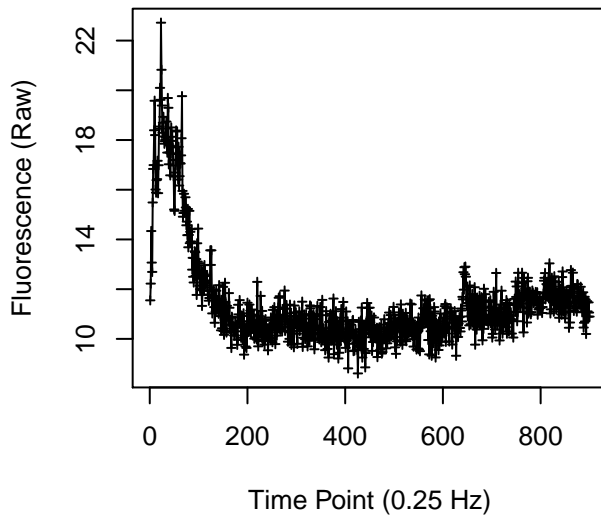



**Cell 41**

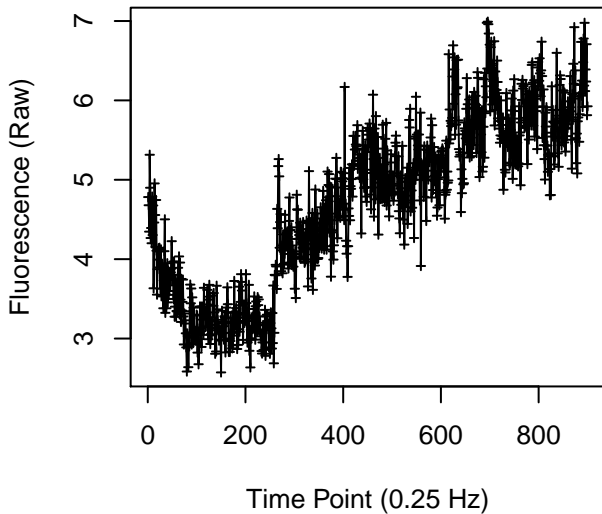

**Cell 42**

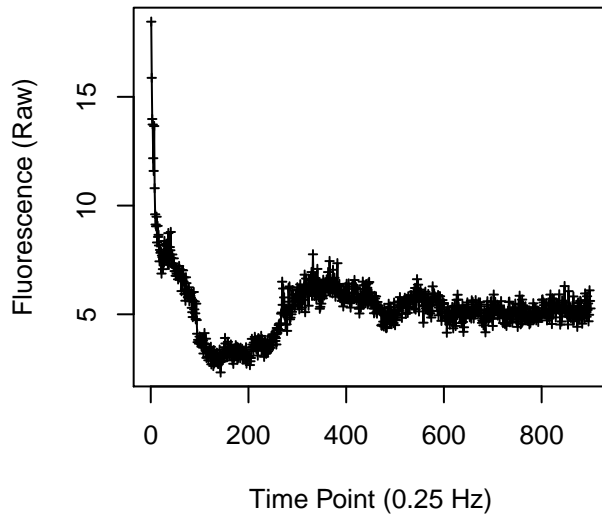

**Cell 43**

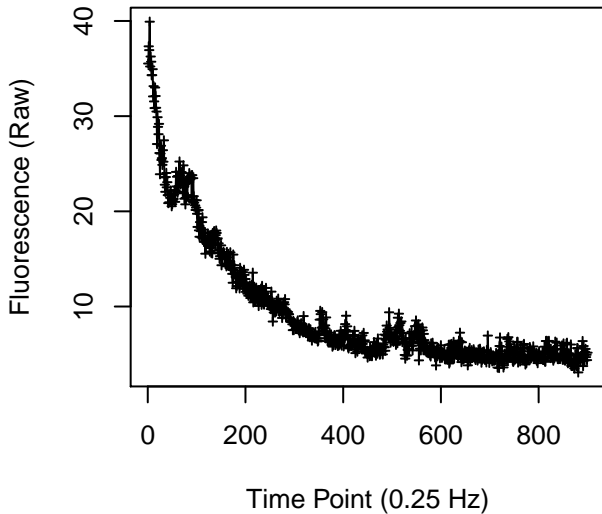

**Cell 44**

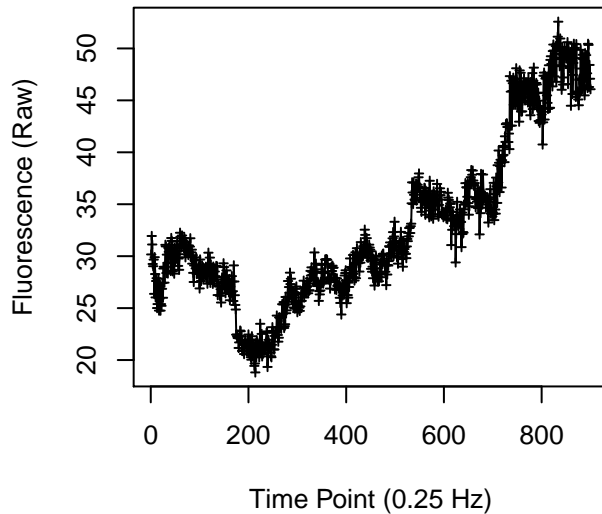

**Cell 45**

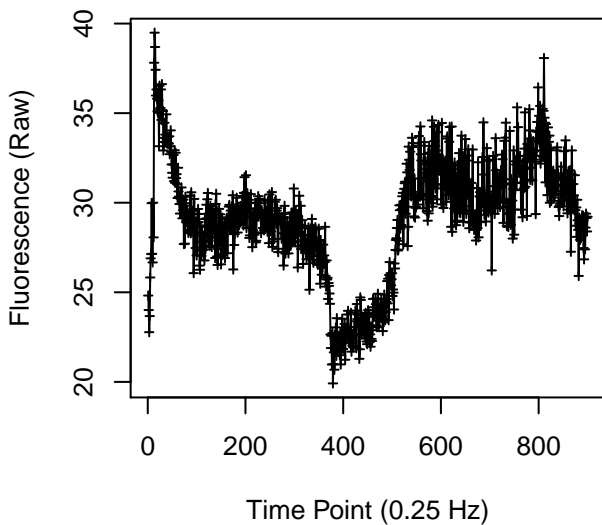

**Cell 46**

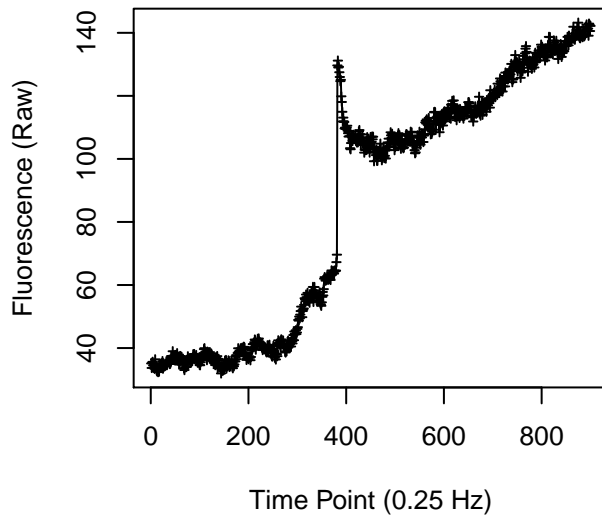

**Cell 47**

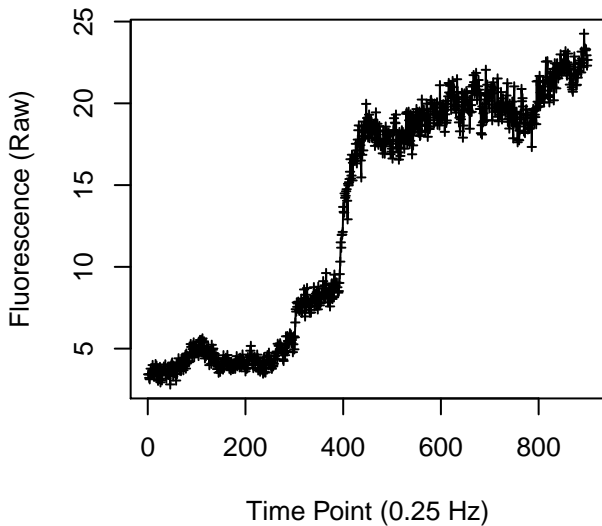

**Cell 48**

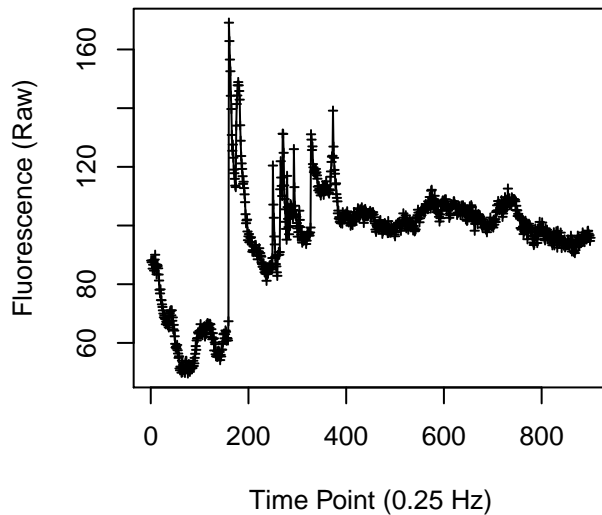

**Cell 49**

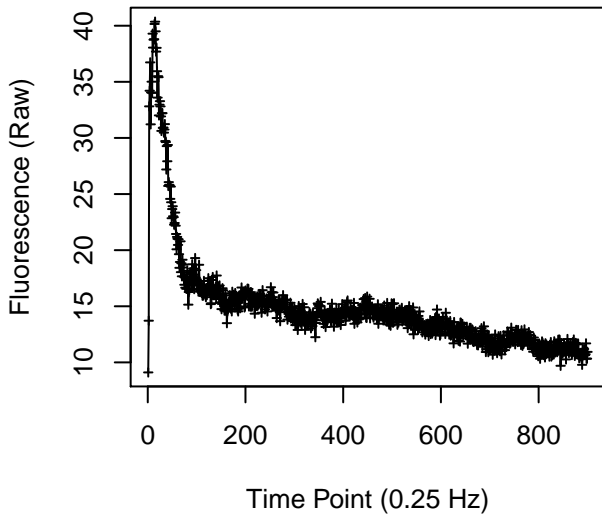

**Cell 50**

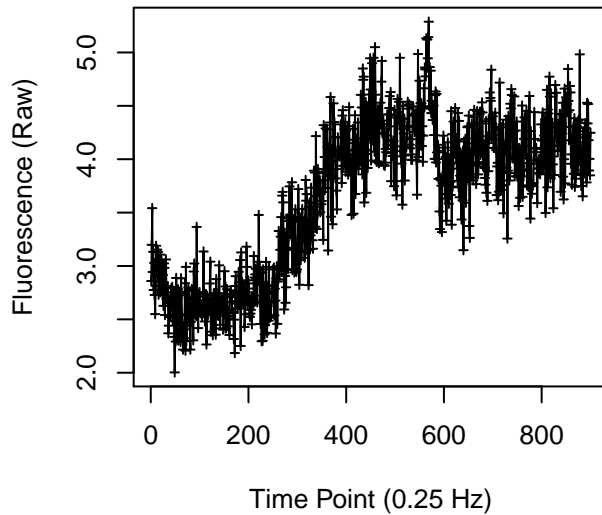

**Cell 51**

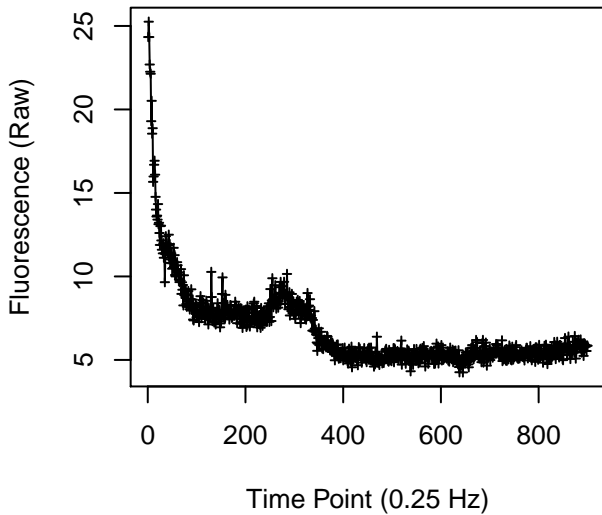

**Cell 52**

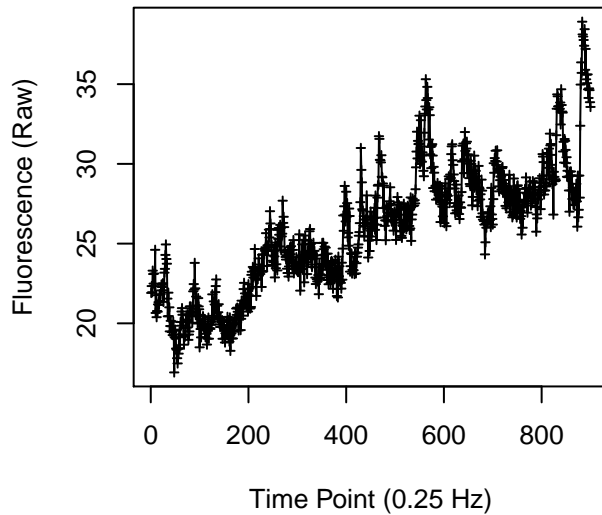

**Cell 53**

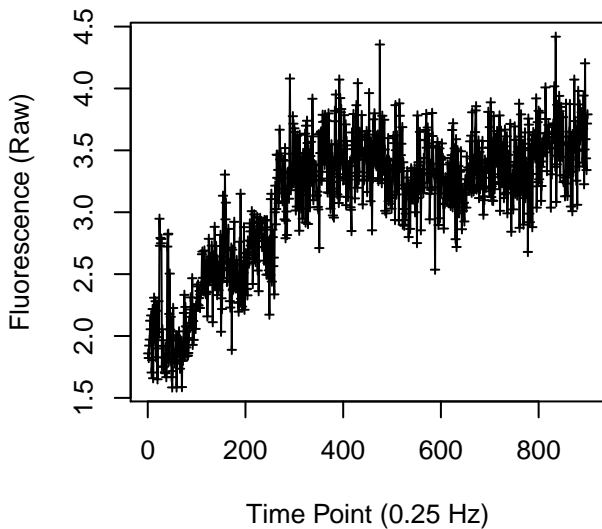

**Cell 54**

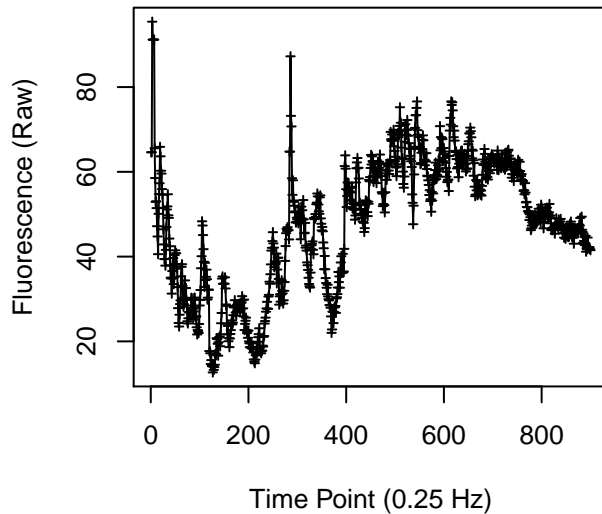

**Cell 55**

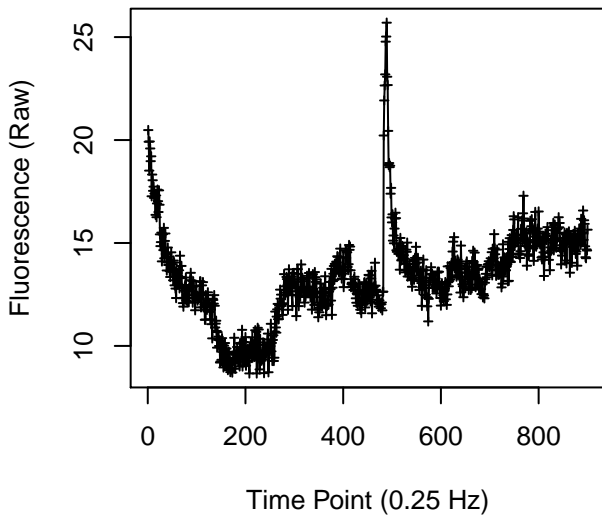

**Cell 56**

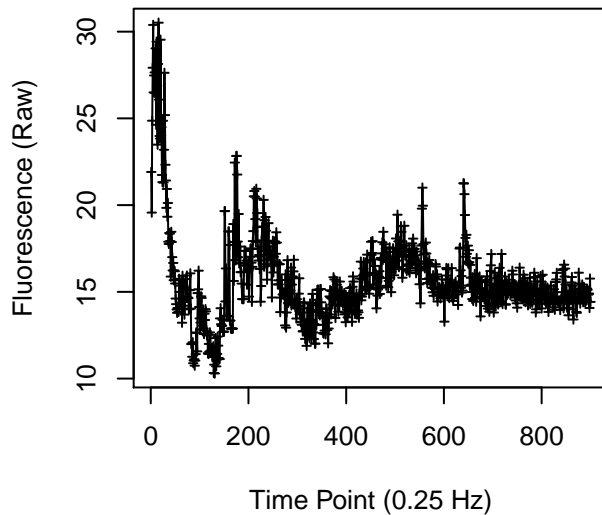

**Cell 57**

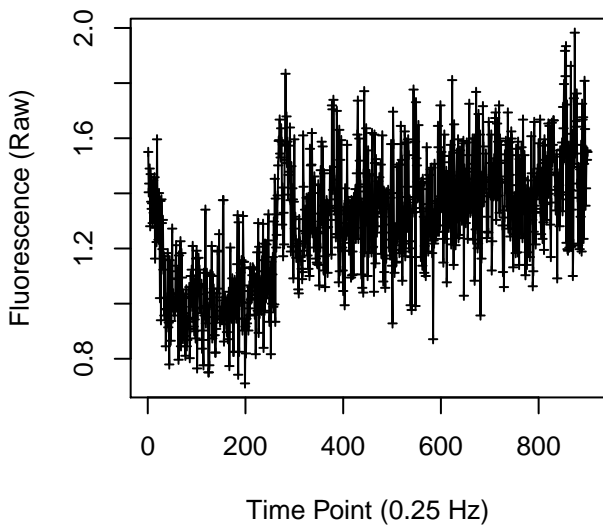

**Cell 58**

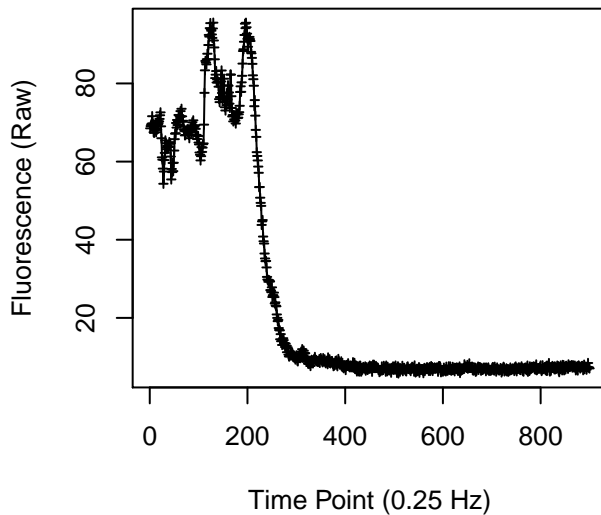

**Cell 59**

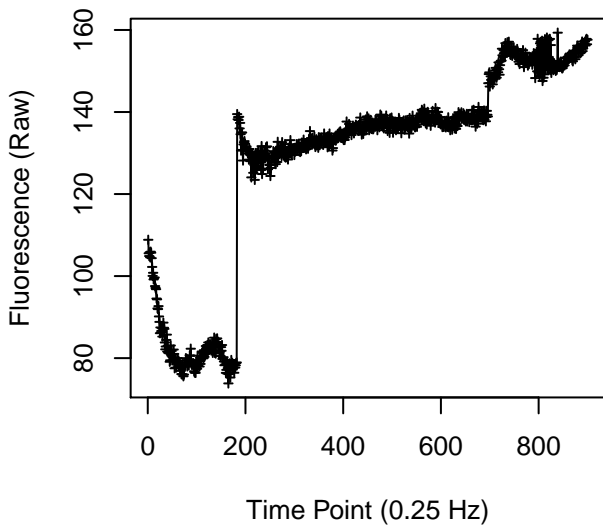

**Cell 60**

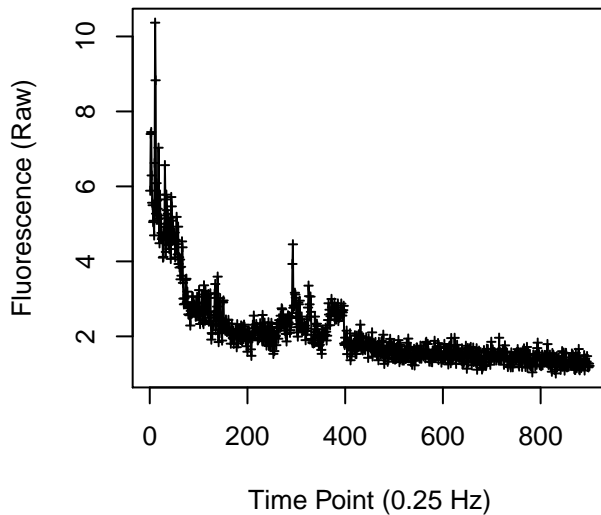

**Cell 61**

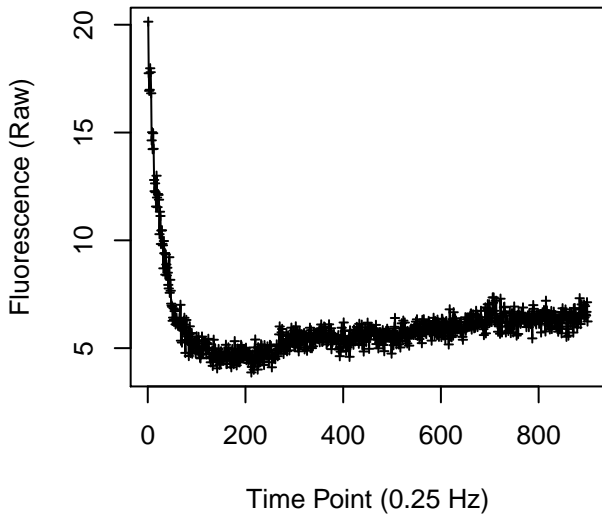

**Cell 62**

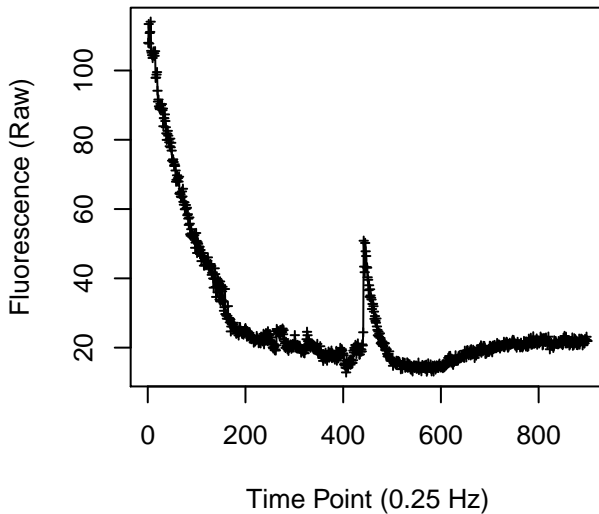

**Cell 63**

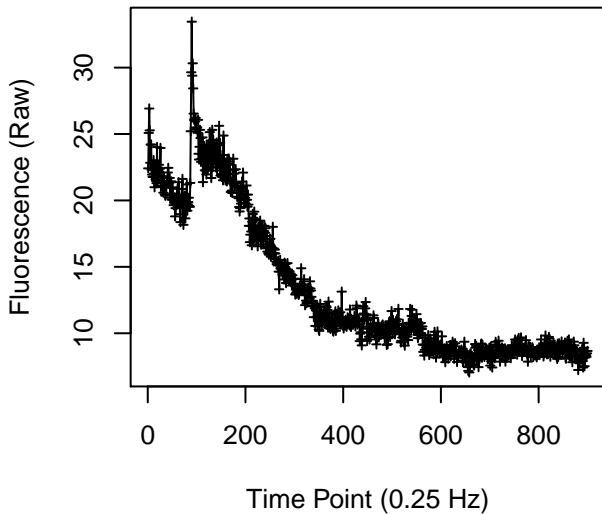

**Cell 64**

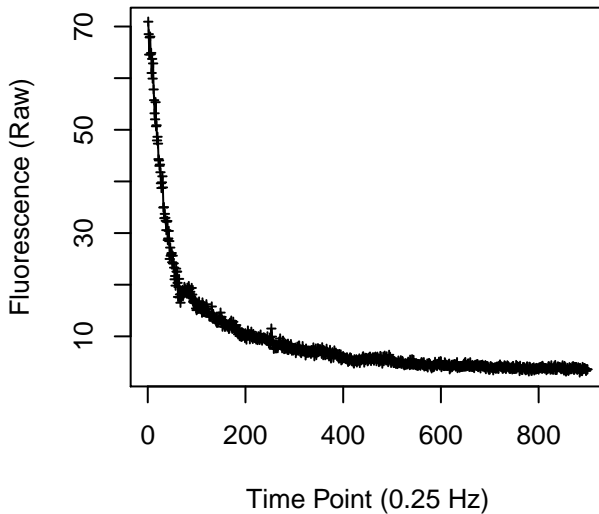

**Cell 65**

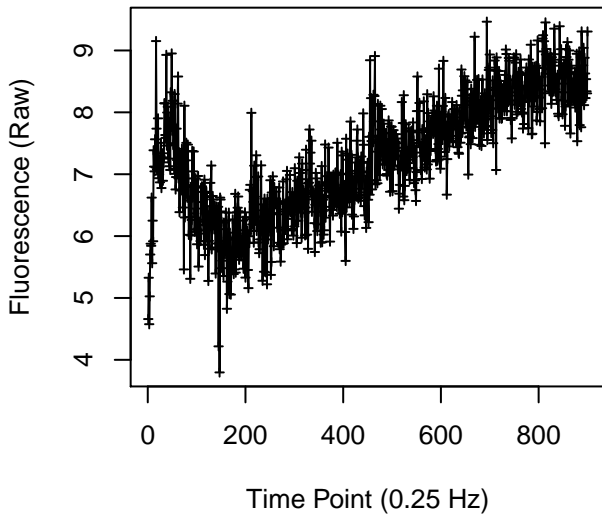

**Cell 66**

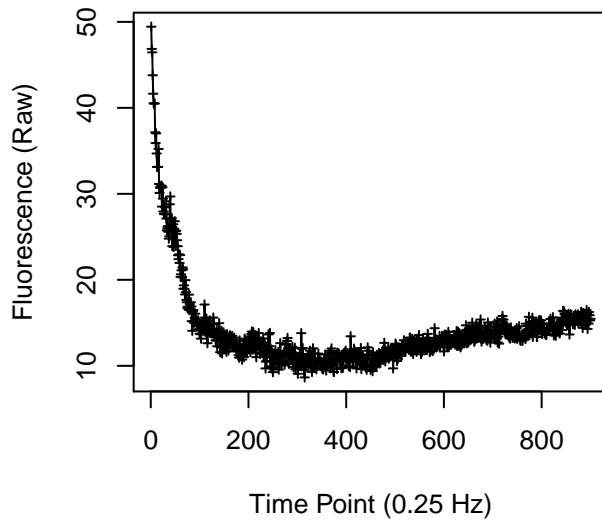

**Cell 67**

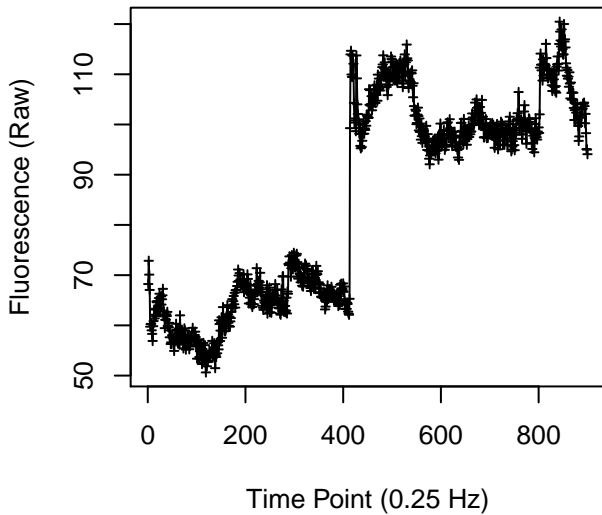

**Cell 68**

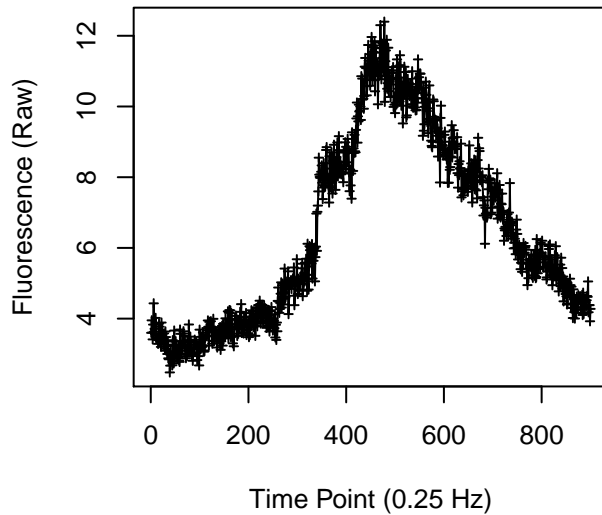

**Cell 69**

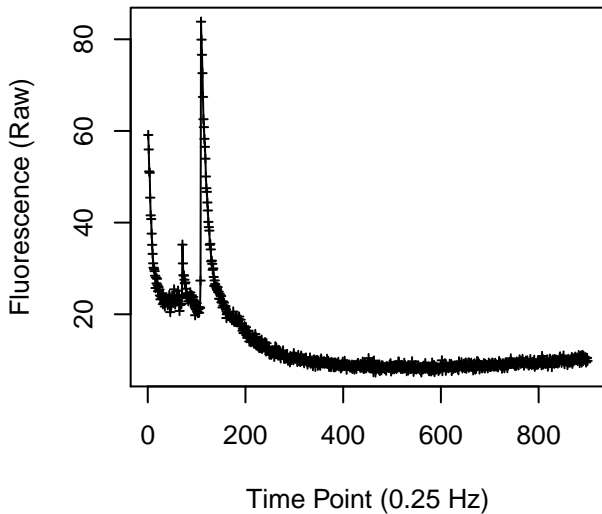

**Cell 70**

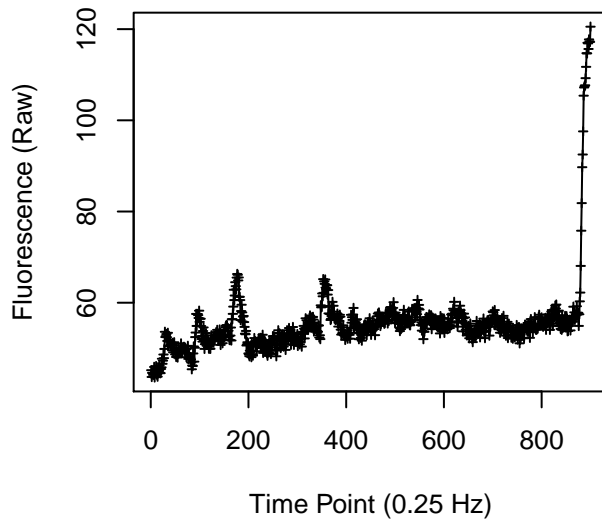

**Cell 71**

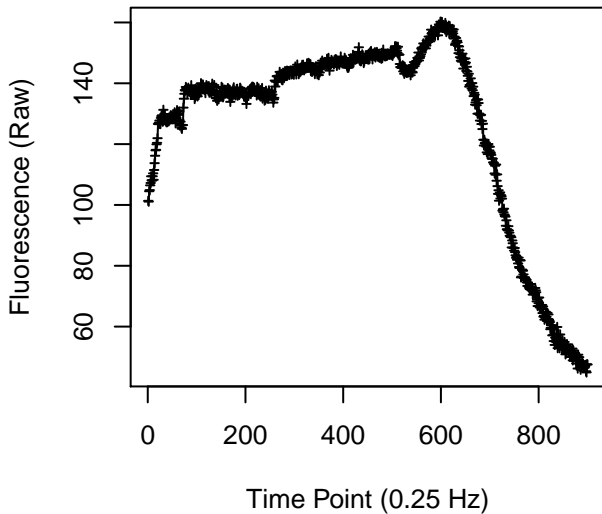

**Cell 72**

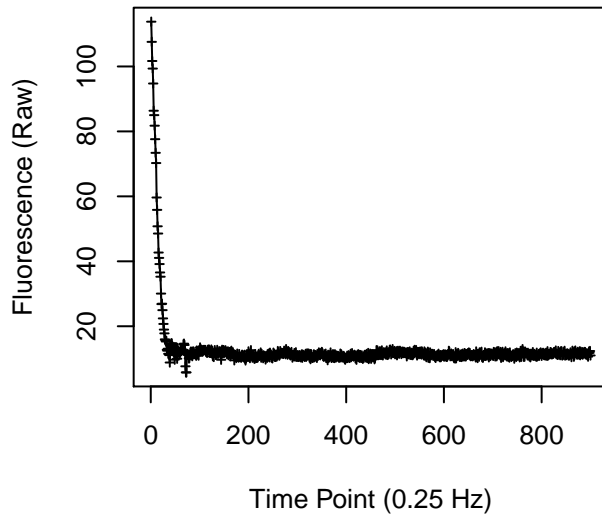



**Cell 73**

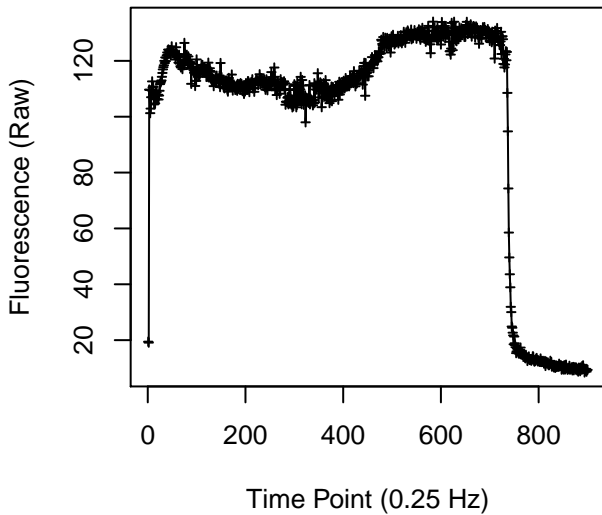

**Cell 74**

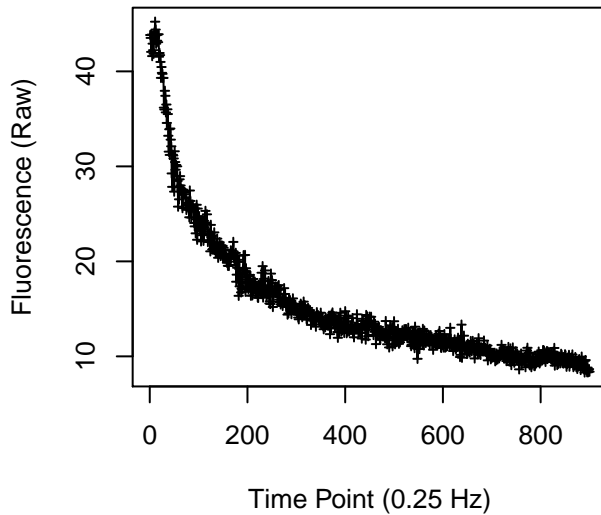

**Cell 75**

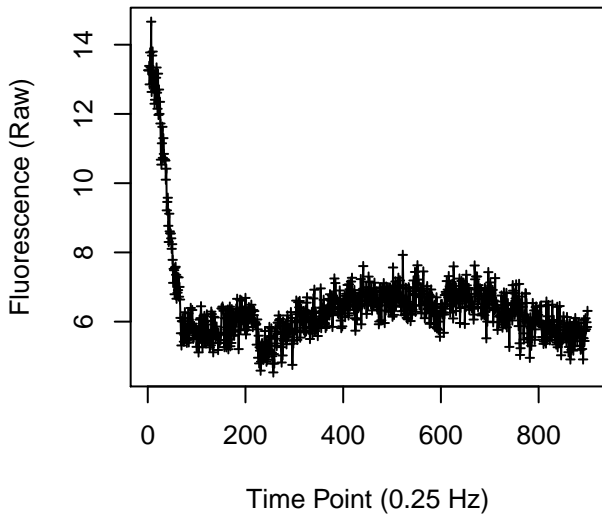

**Cell 76**

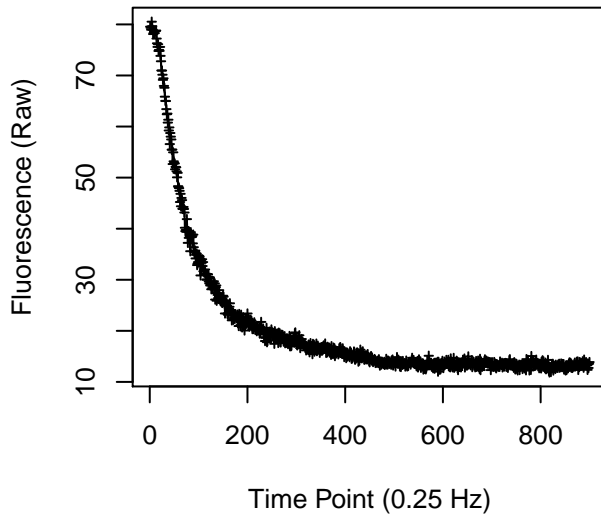

**Cell 77**

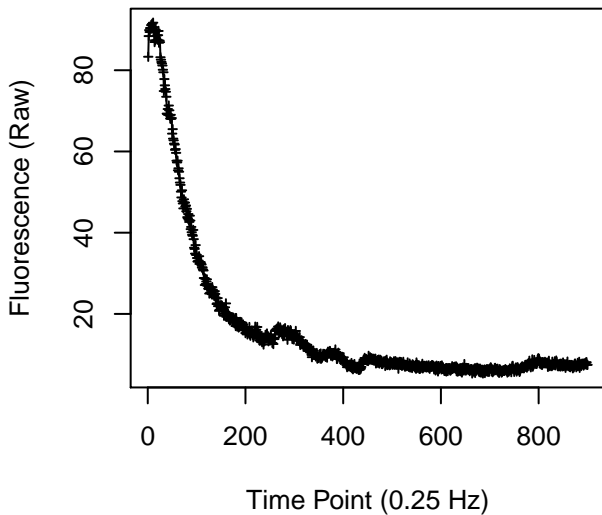

**Cell 78**

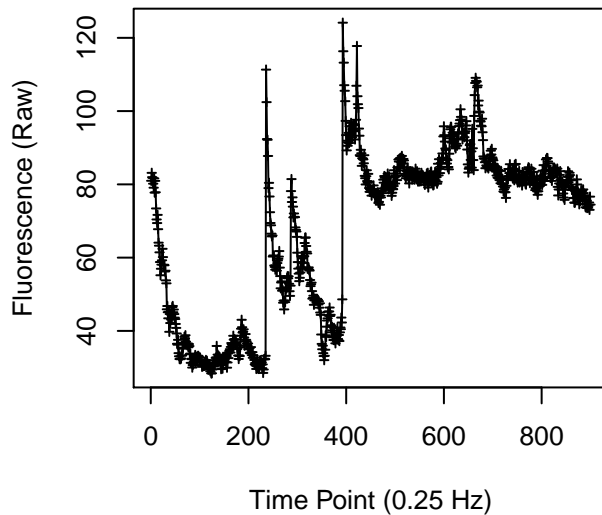

**Cell 79**

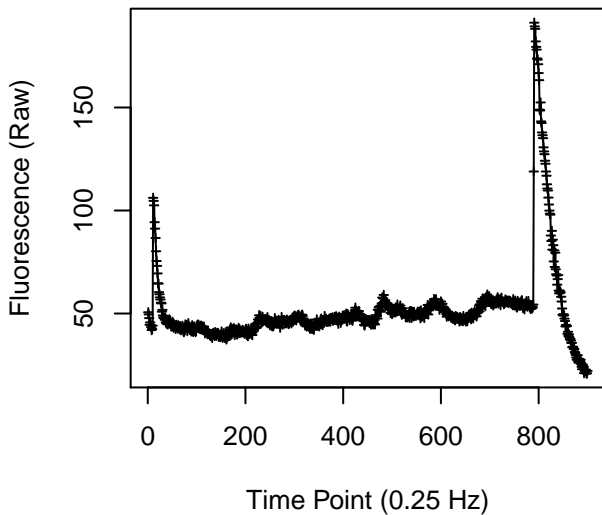

**Cell 80**

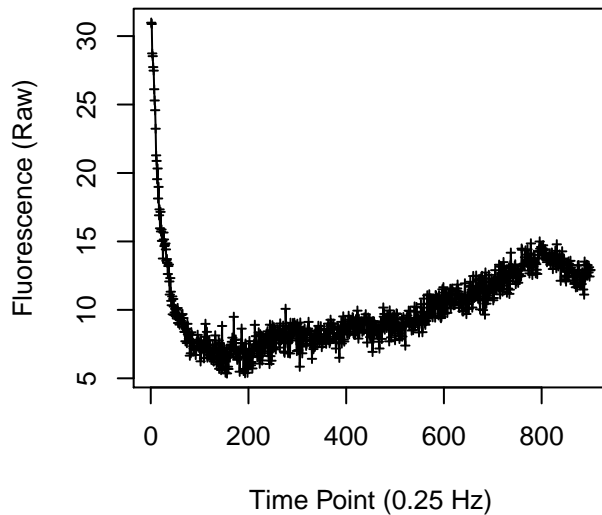

**Cell 81**

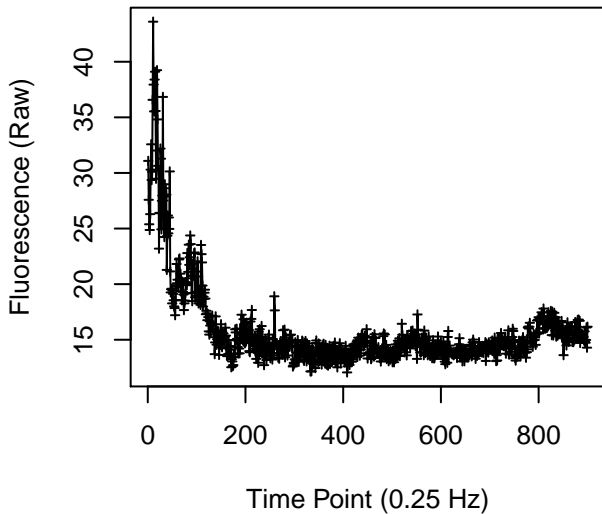

**Cell 82**

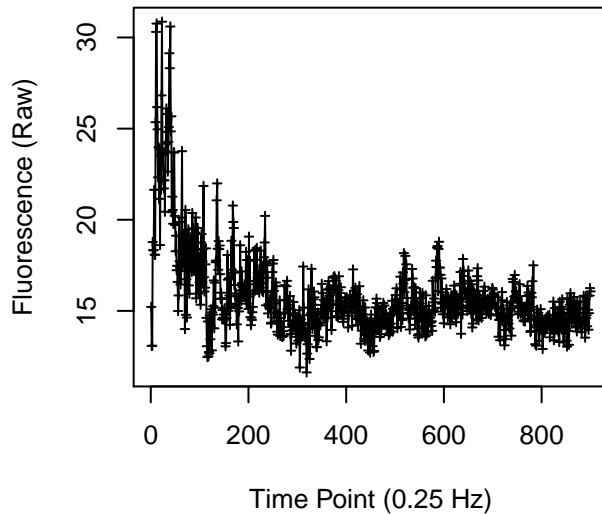

**Cell 83**

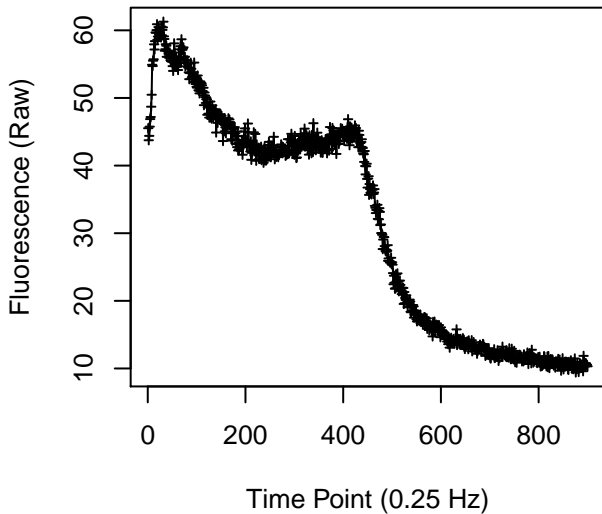

**Cell 84**

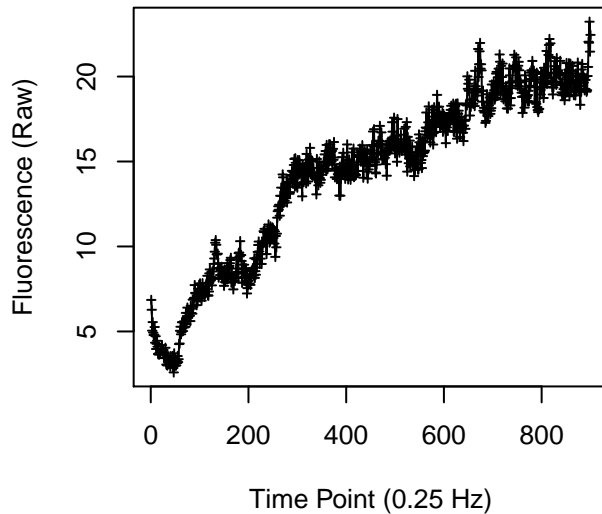

**Cell 85**

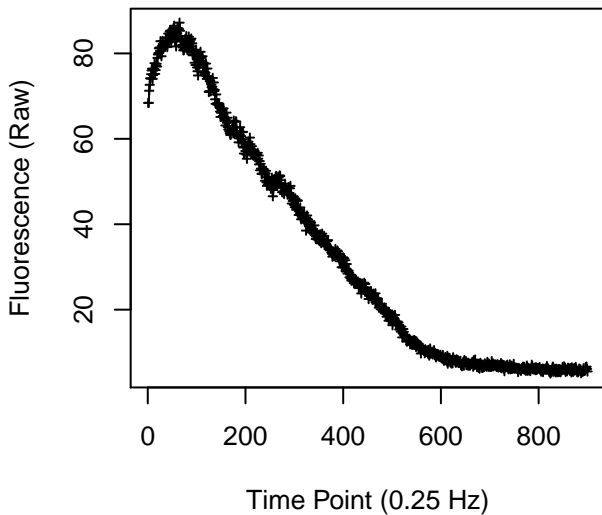

**Cell 86**

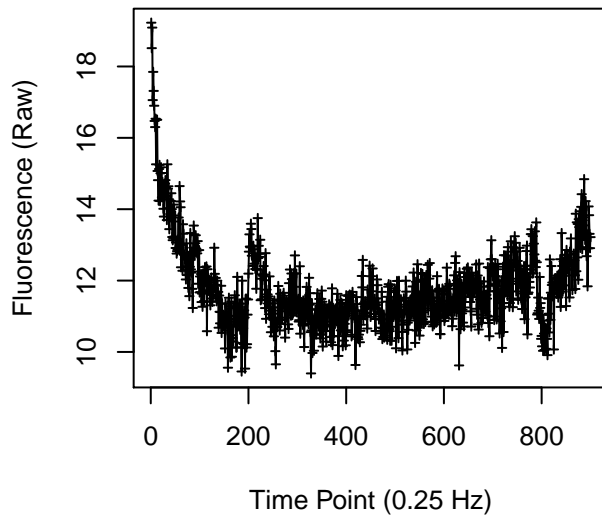

**Cell 87**

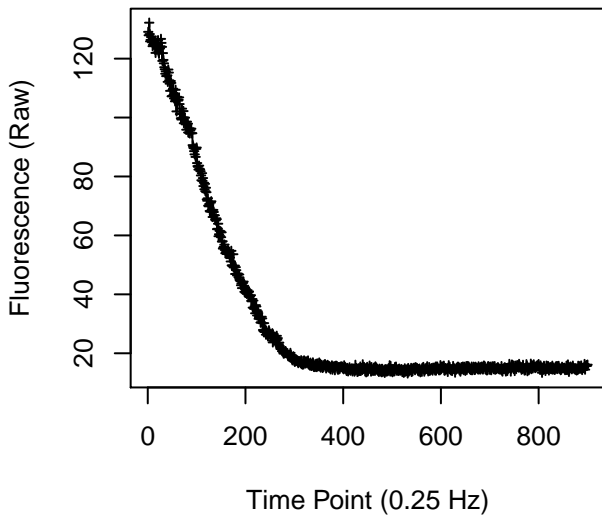

**Cell 88**

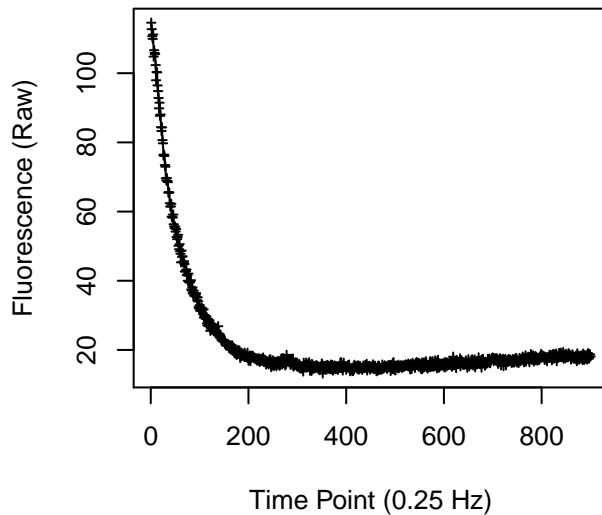

**Cell 89**

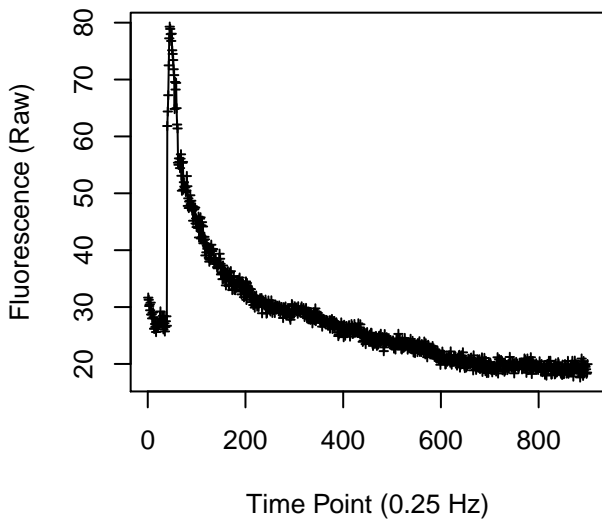

**Cell 90**

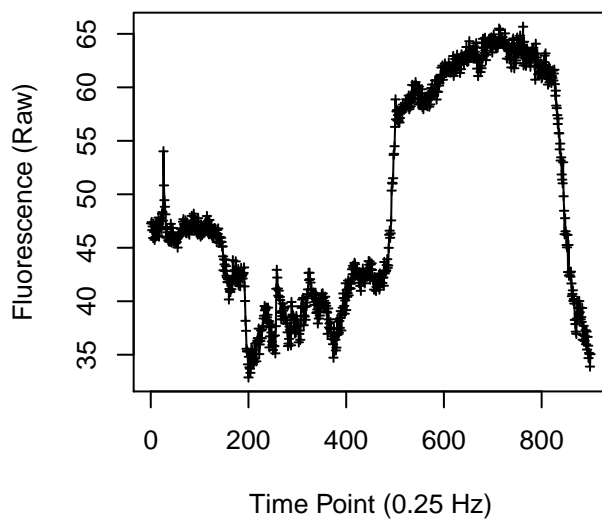

**Cell 91**

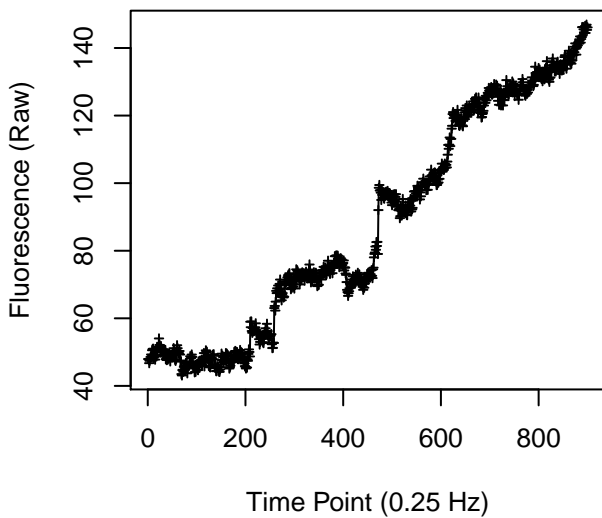

**Cell 92**

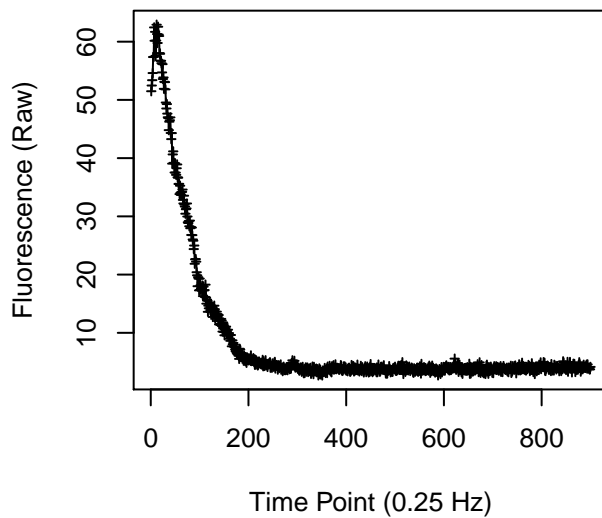

**Cell 93**

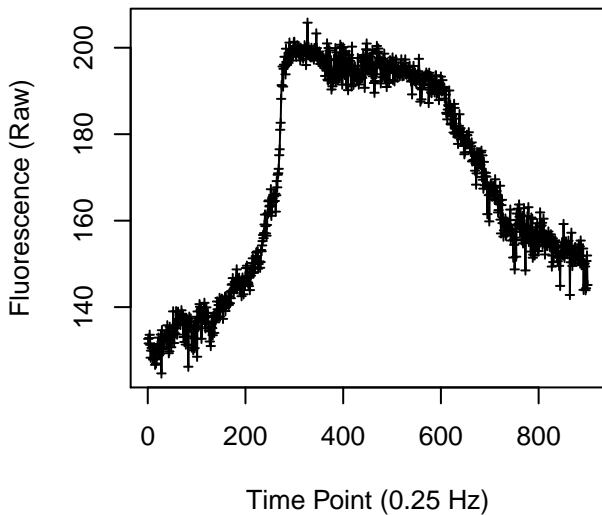

**Cell 94**

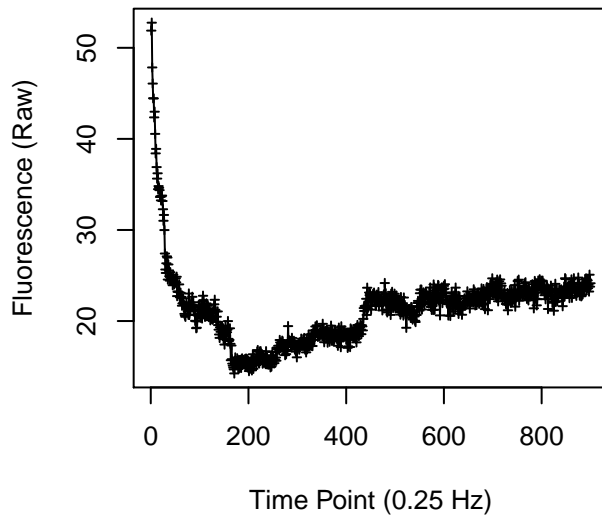

**Cell 95**

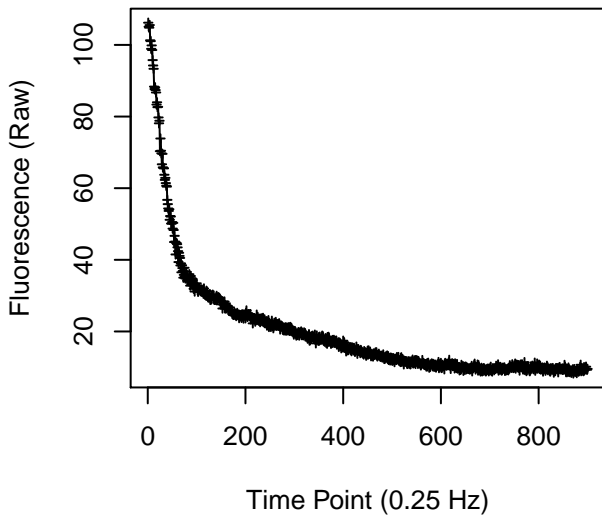

**Cell 96**

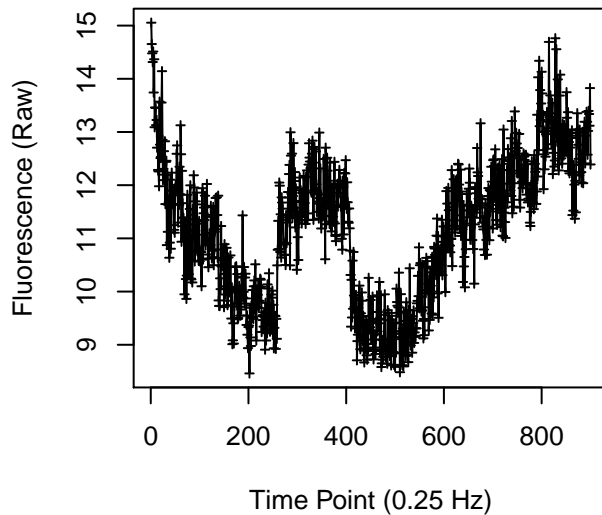

**Cell 97**

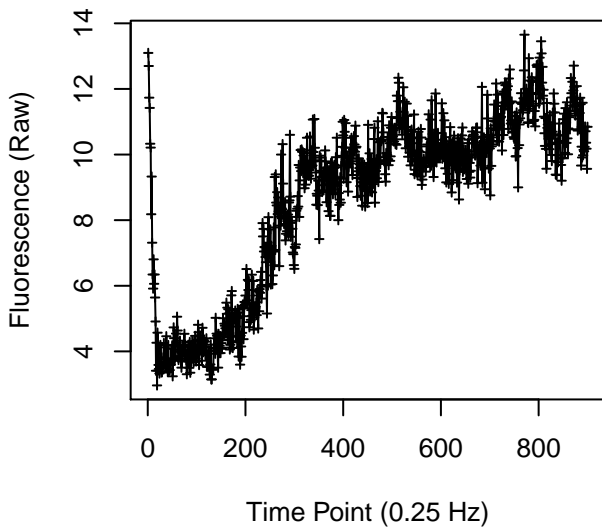

**Cell 98**

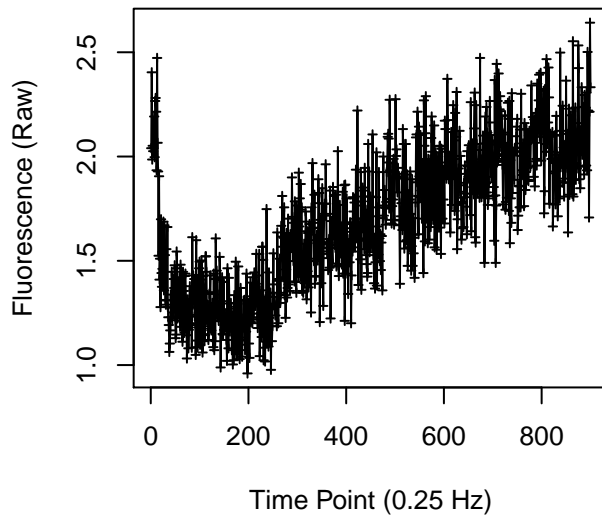

**Cell 99**

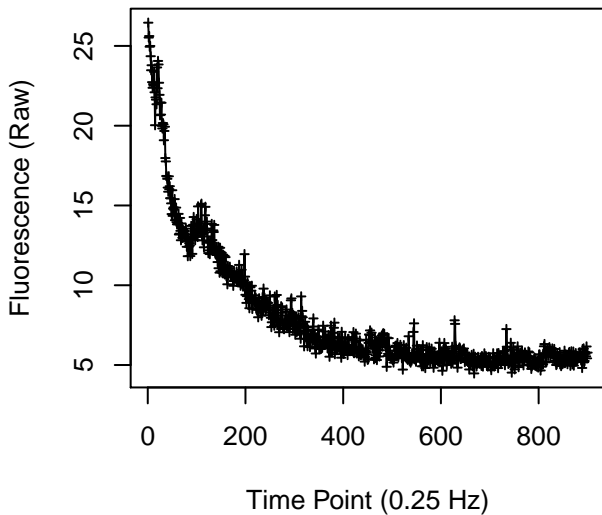

**Cell 100**

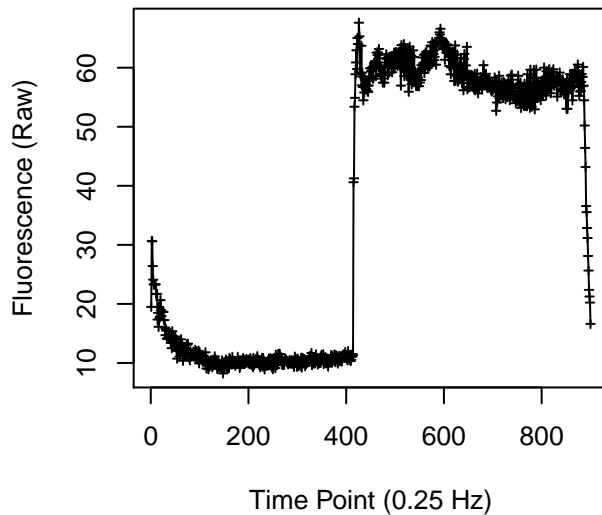

**Cell 101**

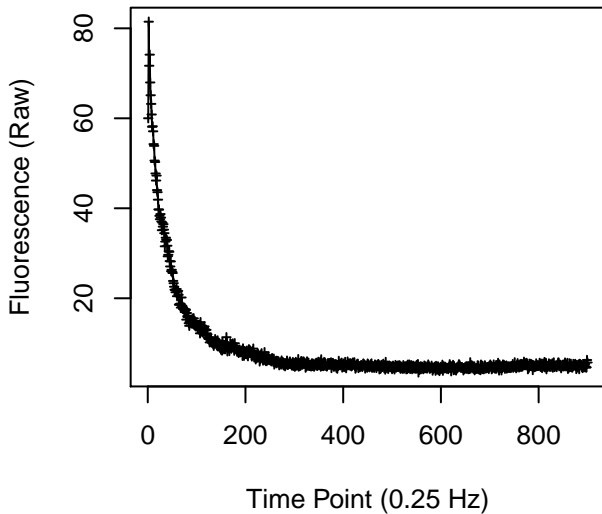

**Cell 102**

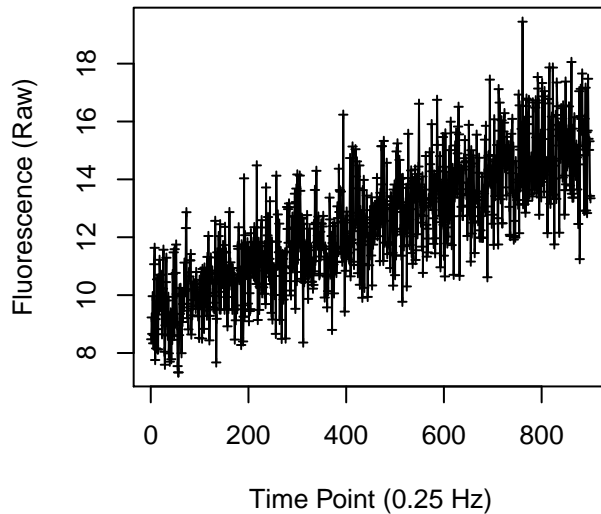

**Cell 103**

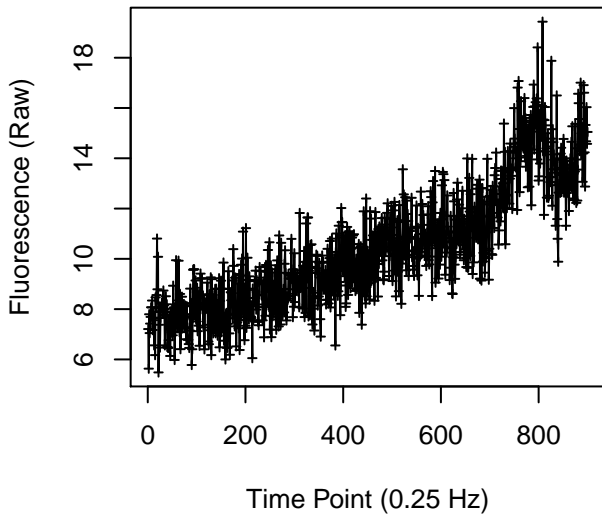

**Cell 104**

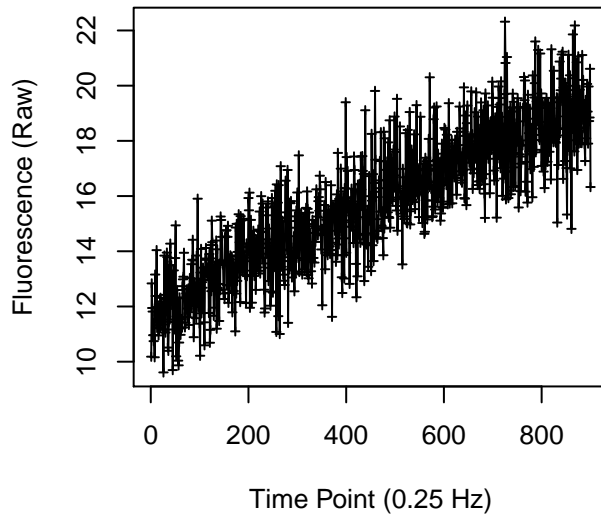



**Cell 105**

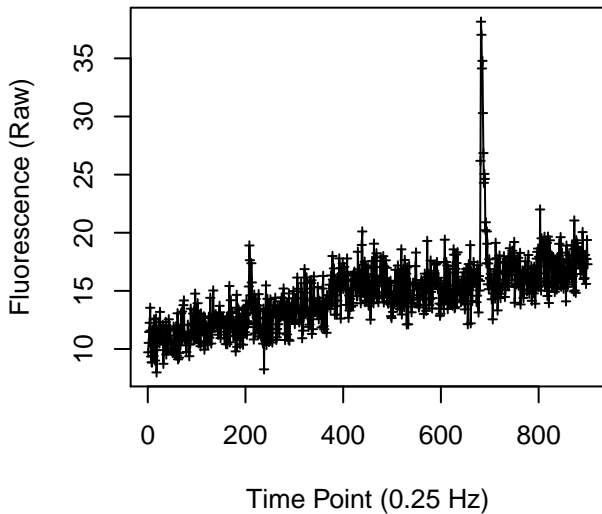

**Cell 106**

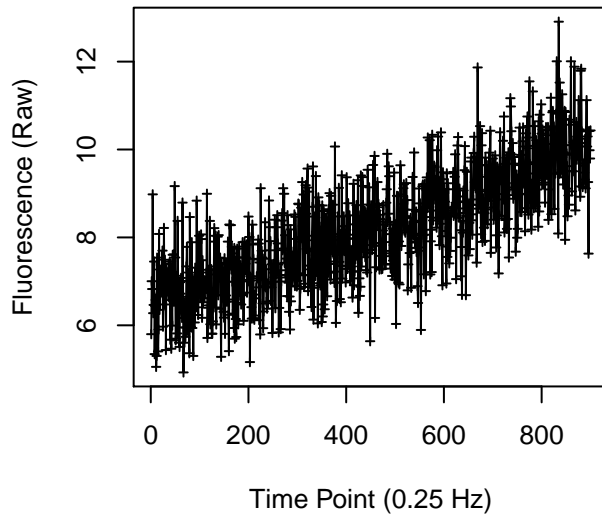

**Cell 107**

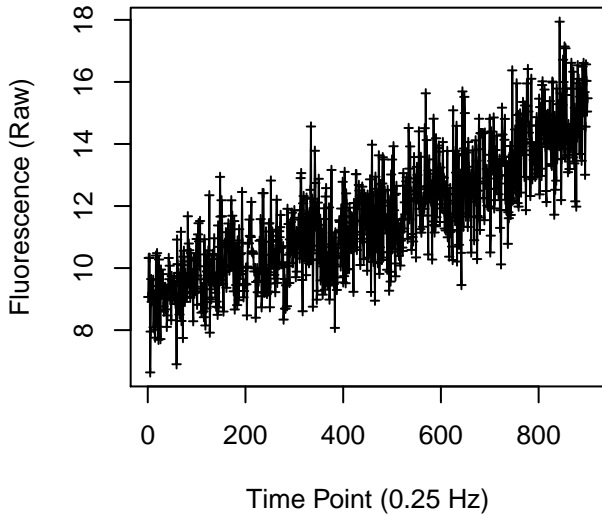

**Cell 108**

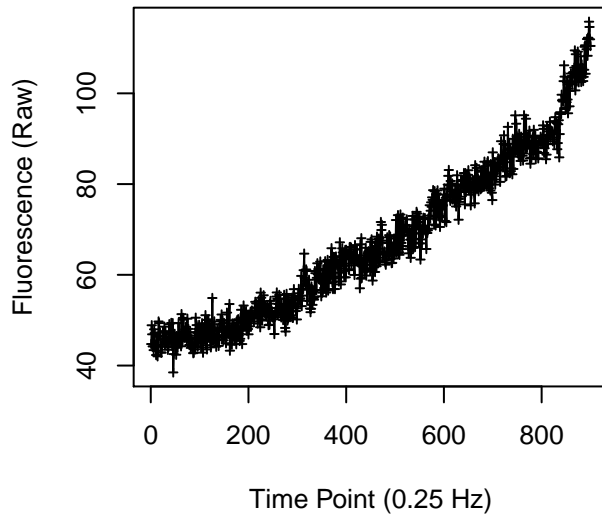

**Cell 109**

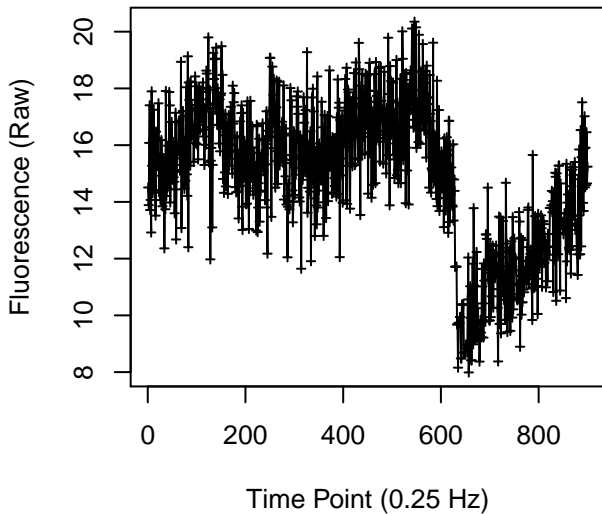

**Cell 110**

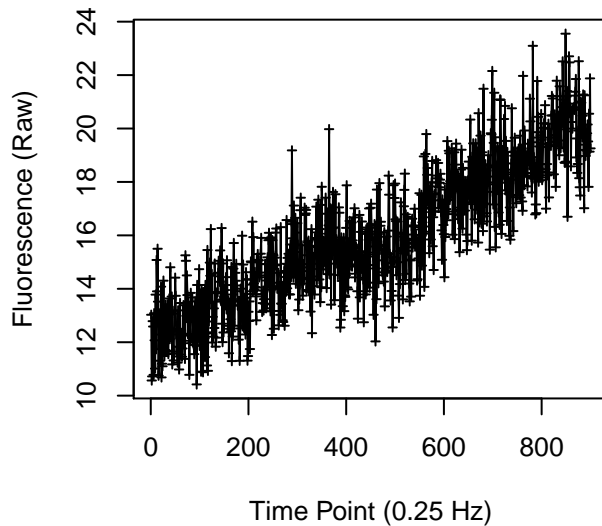

**Cell 111**

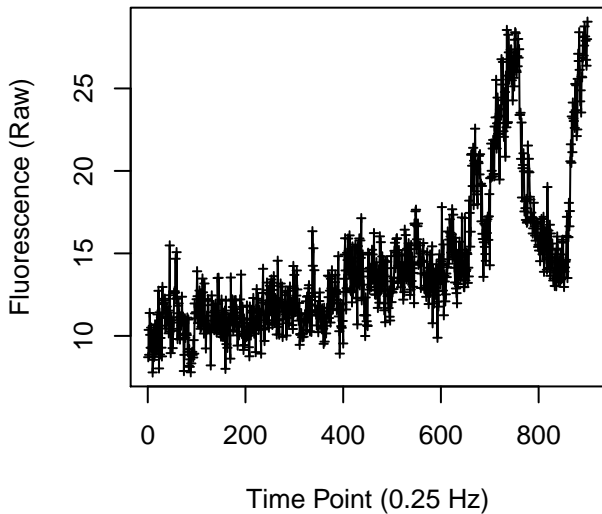

**Cell 112**

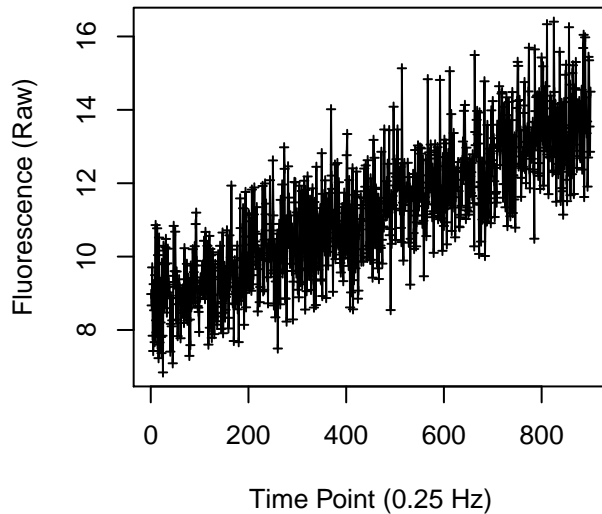

**Cell 113**

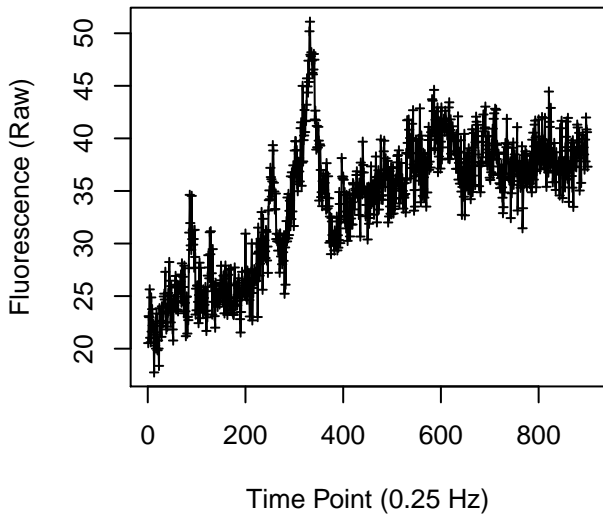

**Cell 114**

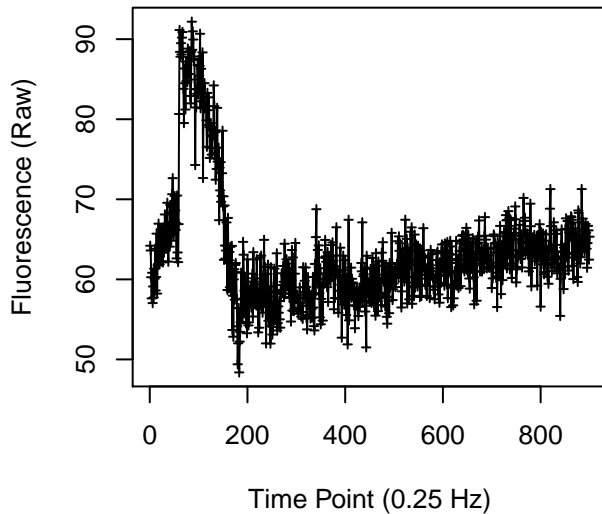

**Cell 115**

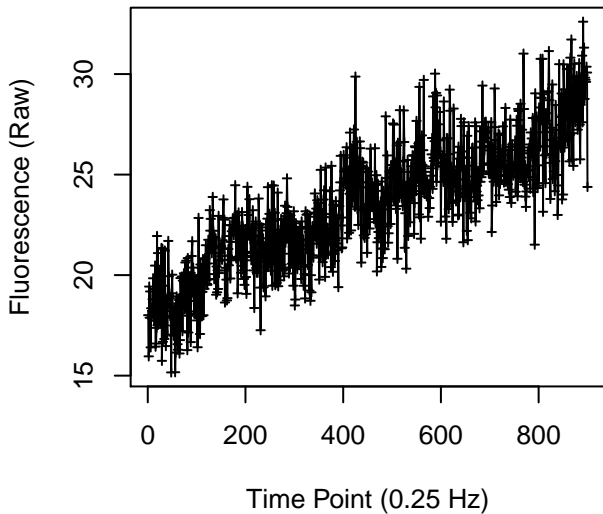

**Cell 116**

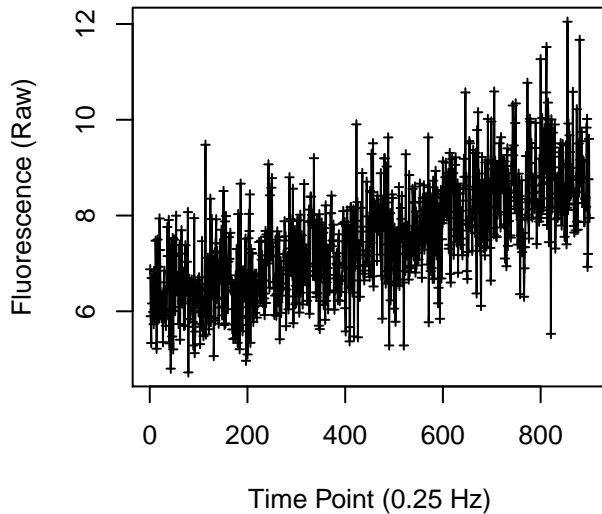

**Cell 117**

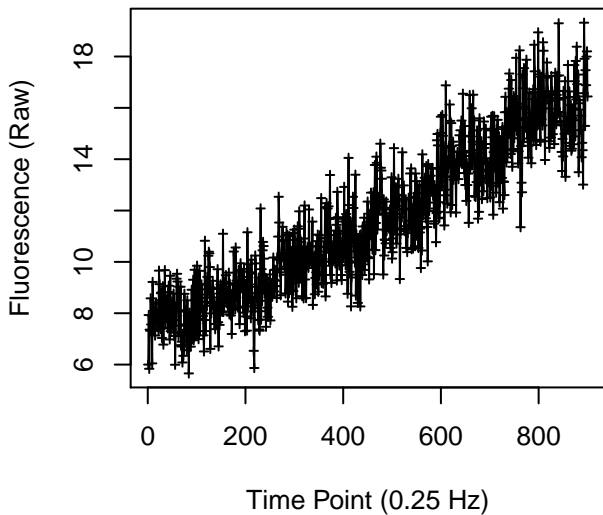

**Cell 118**

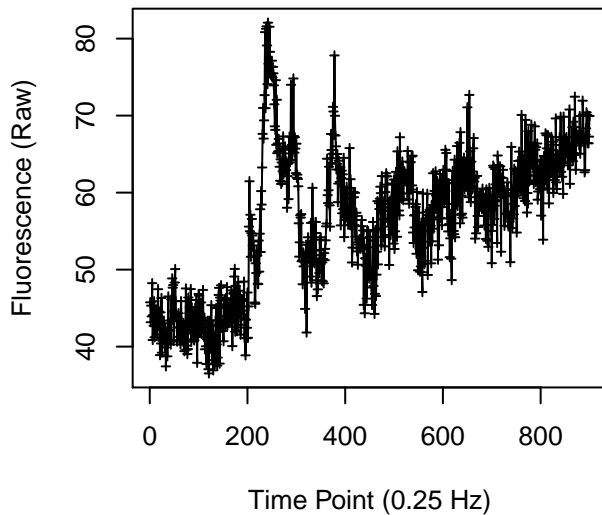

**Cell 119**

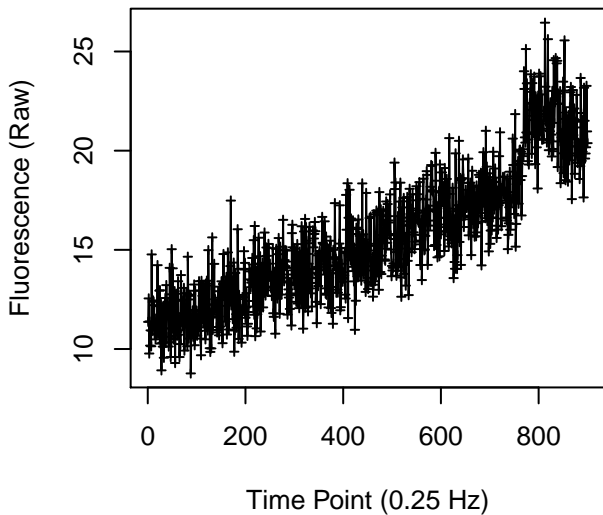

**Cell 120**

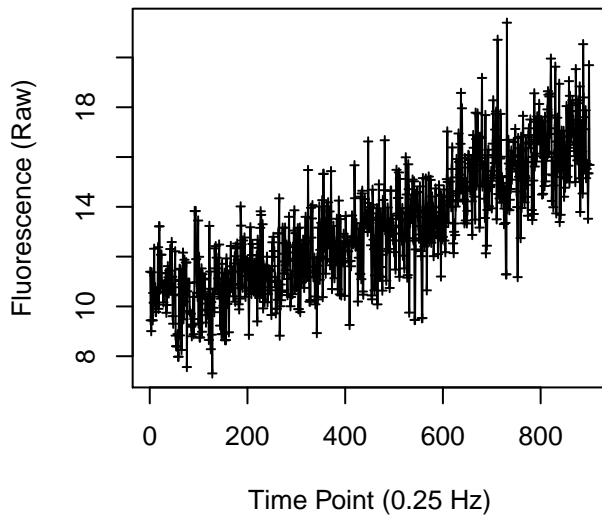

**Cell 121**

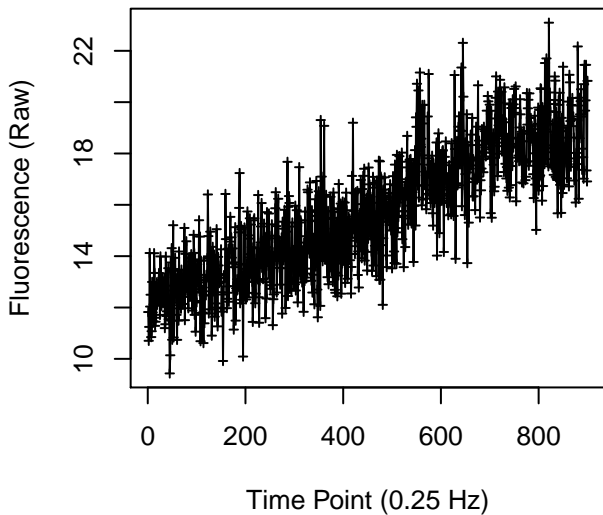

**Cell 122**

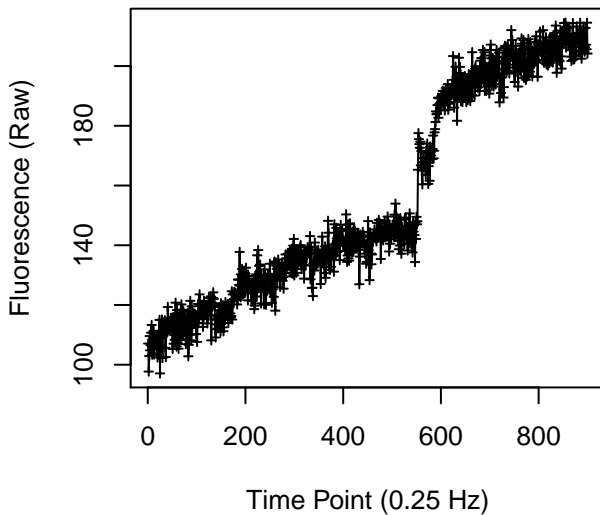

**Cell 123**

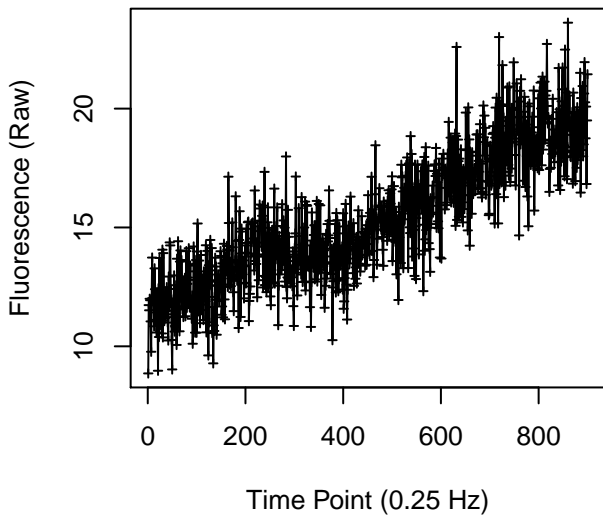

**Cell 124**

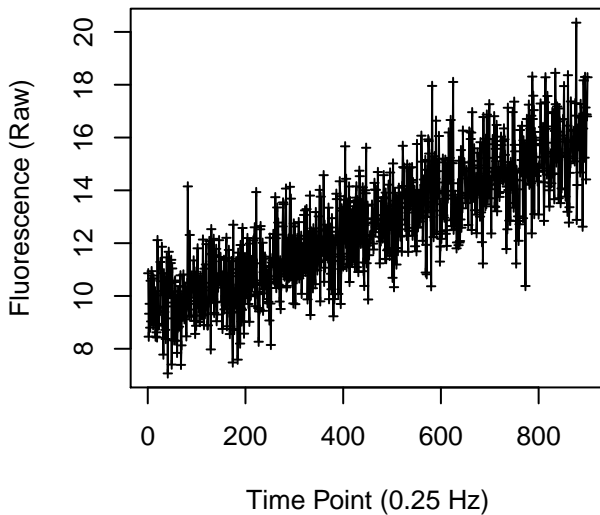

**Cell 125**

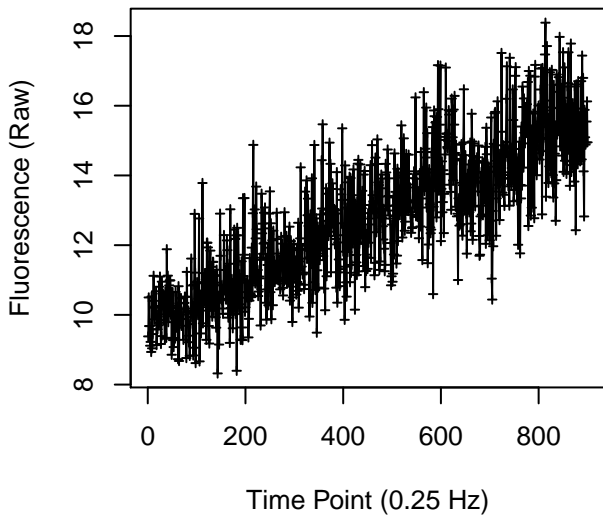

**Cell 126**

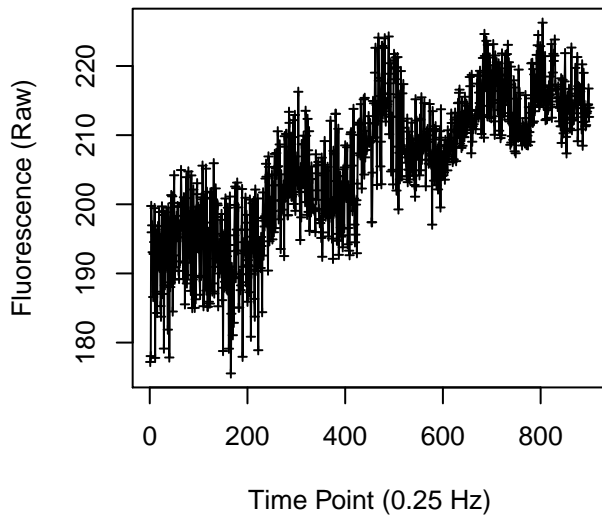

**Cell 127**

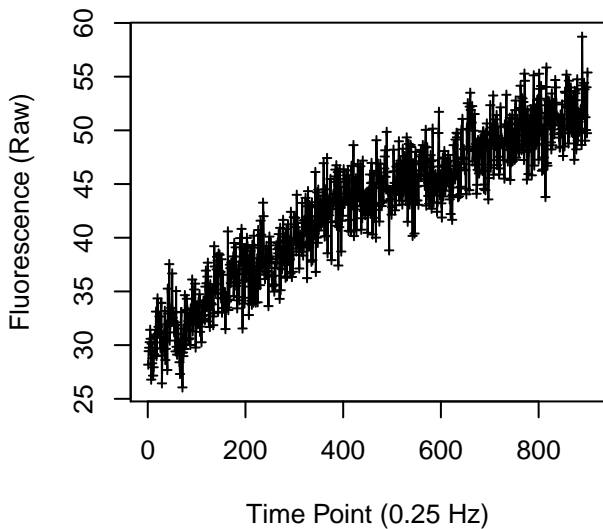

**Cell 128**

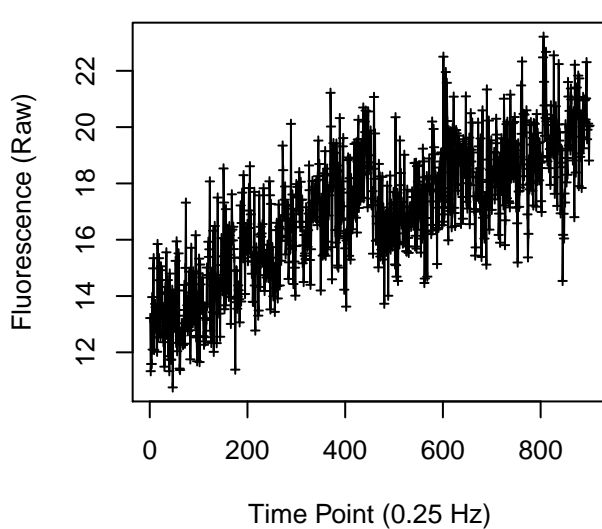

**Cell 129**

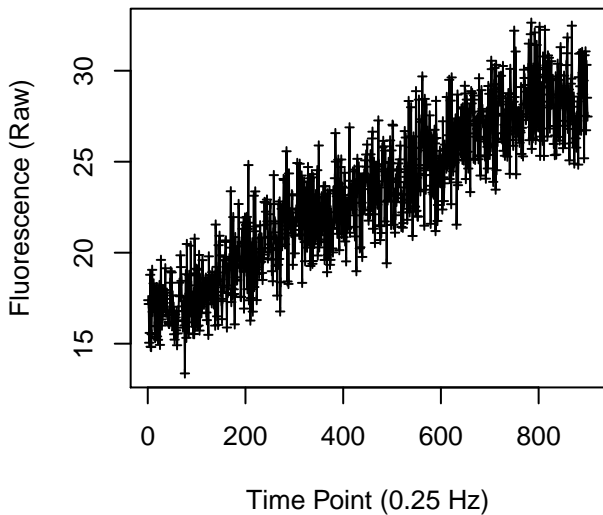

**Cell 130**

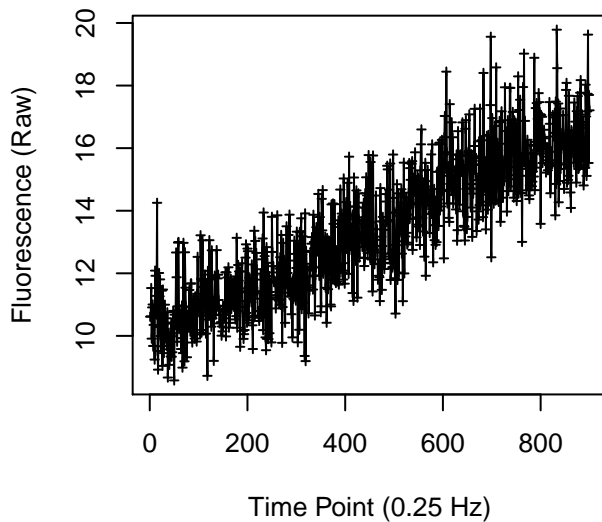

**Cell 131**

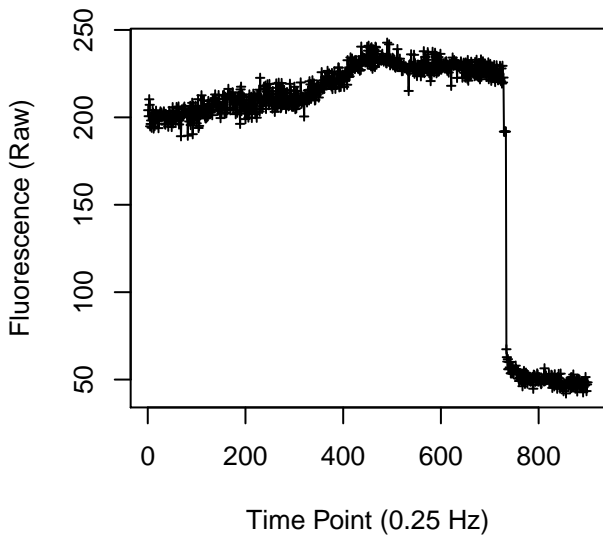

**Cell 132**

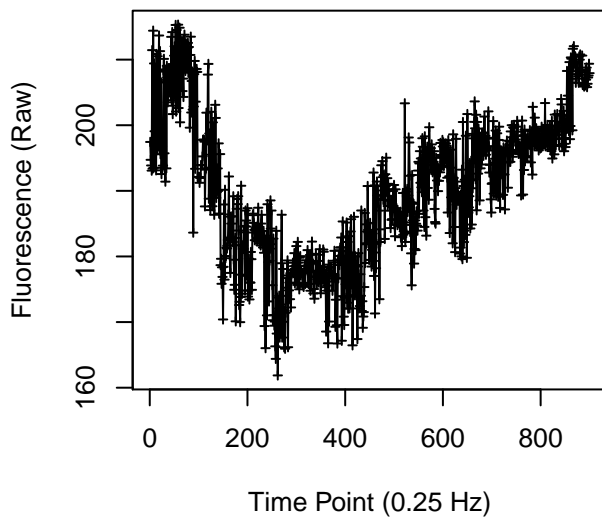

**Cell 133**

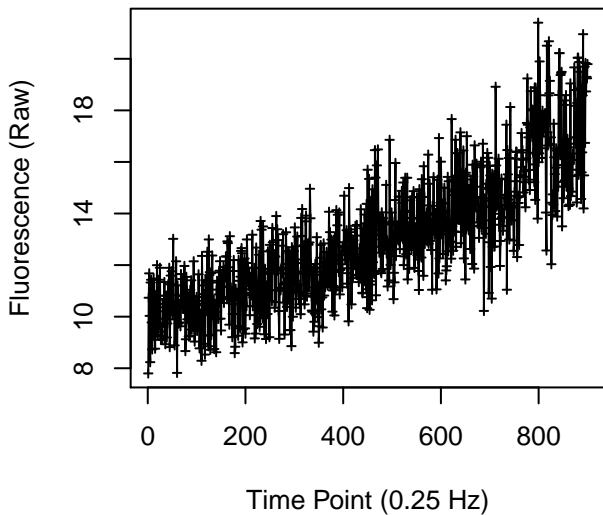

**Cell 134**

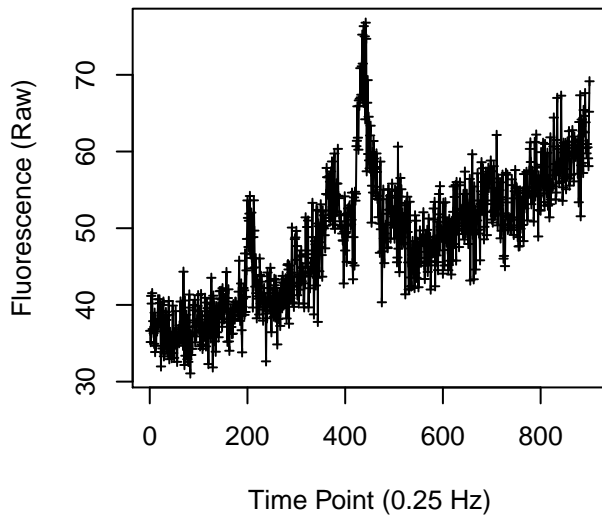

**Cell 135**

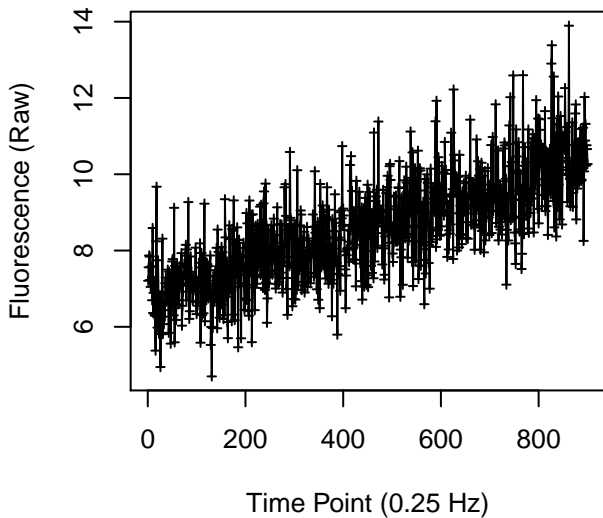

**Cell 136**

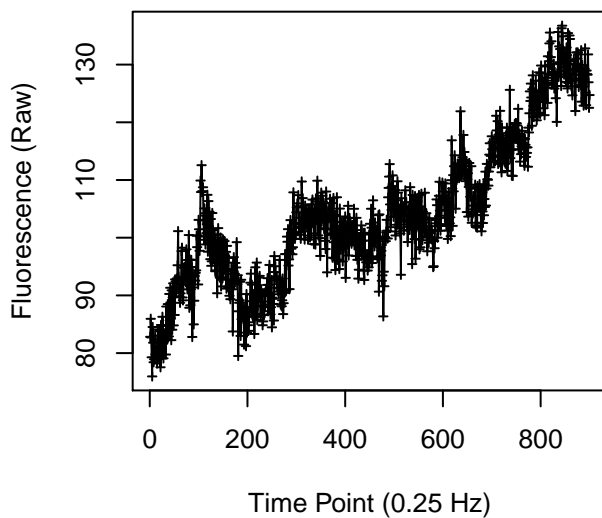



**Cell 137**

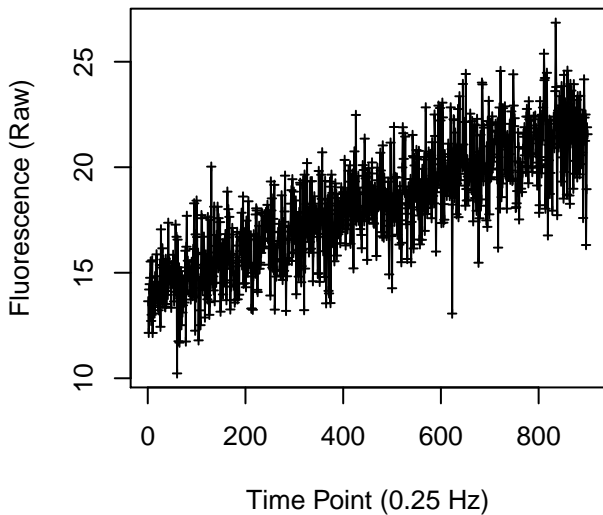

**Cell 138**

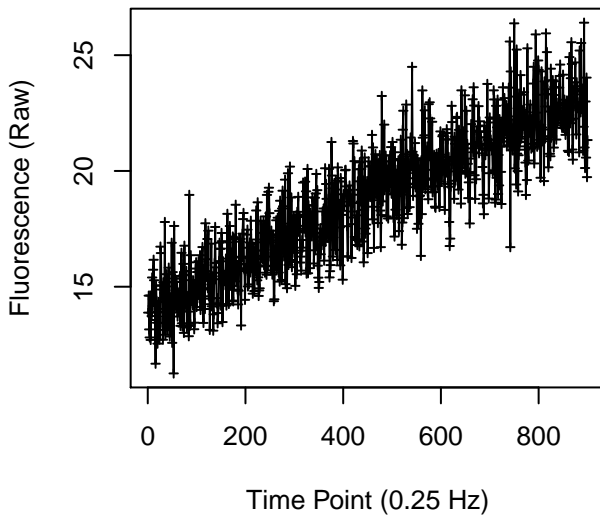

**Cell 139**

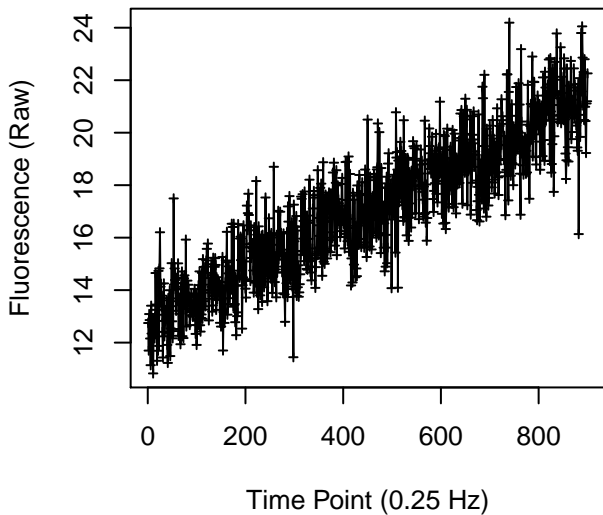

**Cell 140**

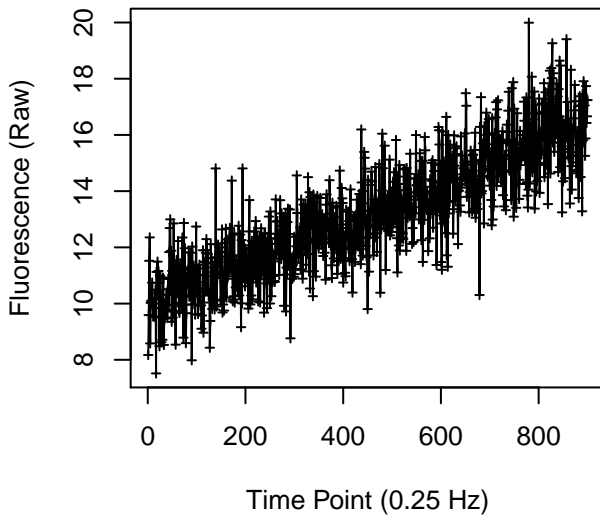

**Cell 141**

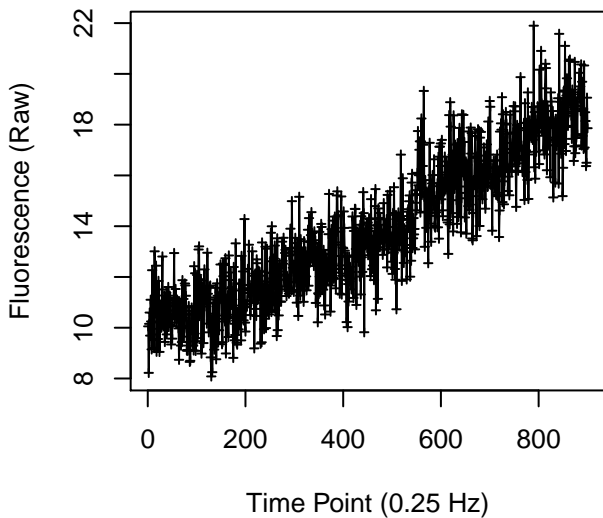

**Cell 142**

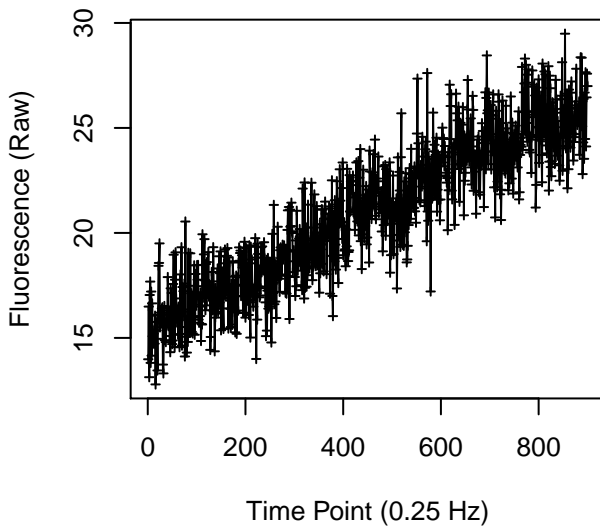

**Cell 143**

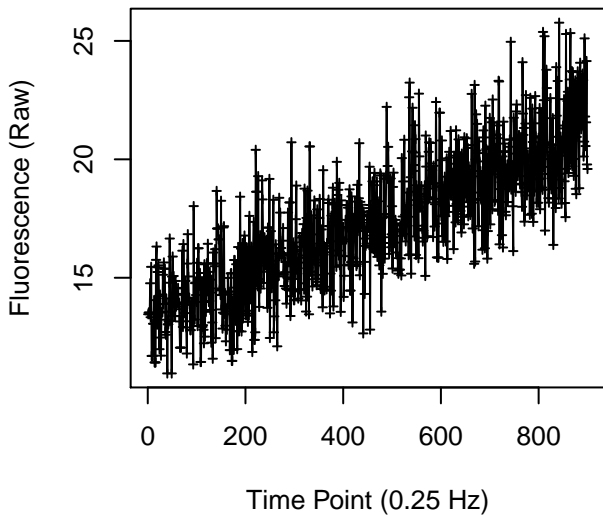

**Cell 144**

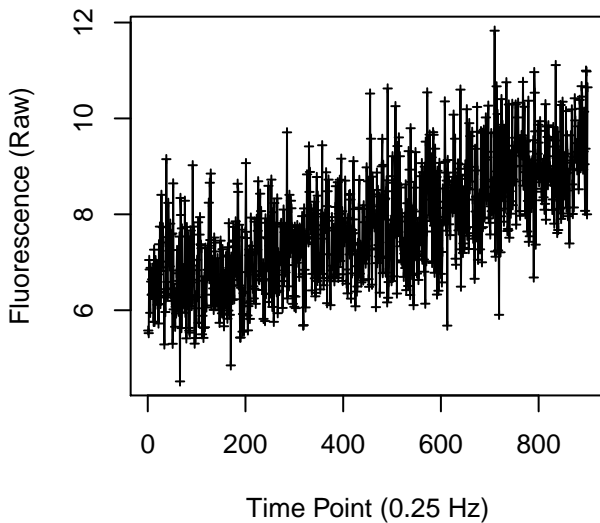

**Cell 145**

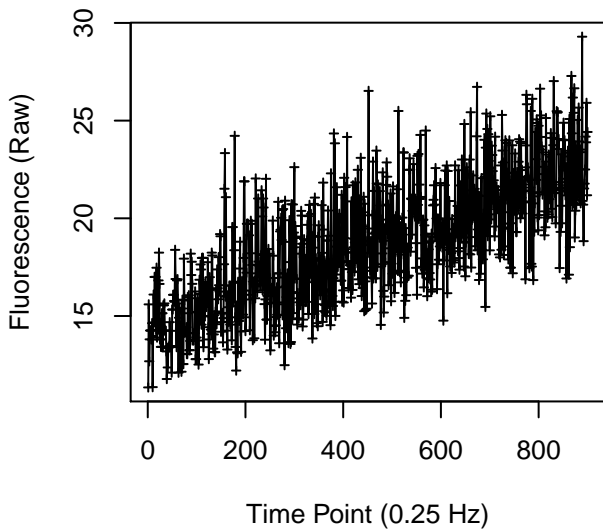

**Cell 146**

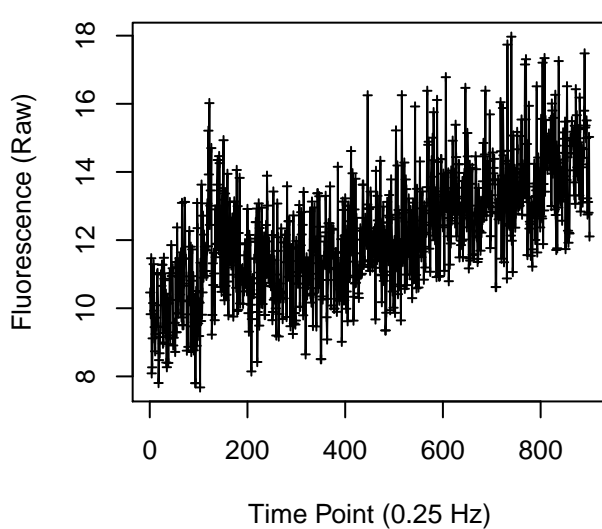

**Cell 147**

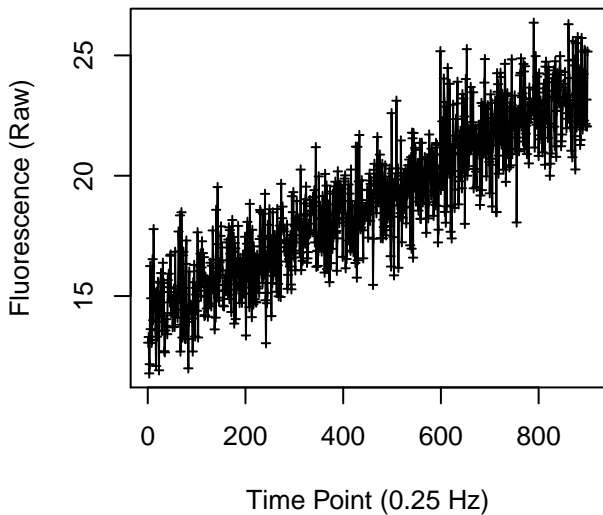

**Cell 148**

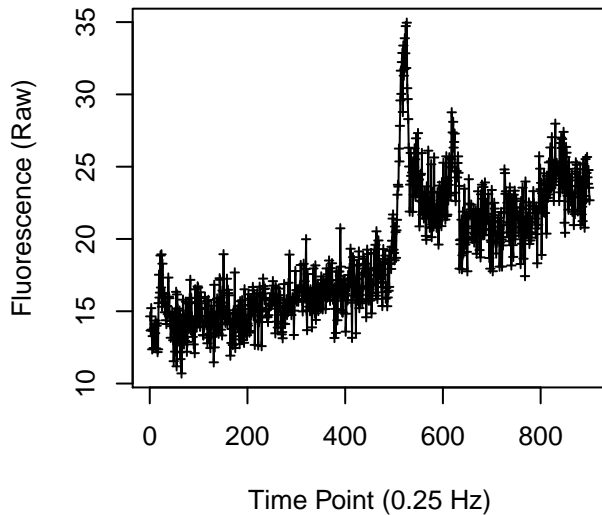

**Cell 149**

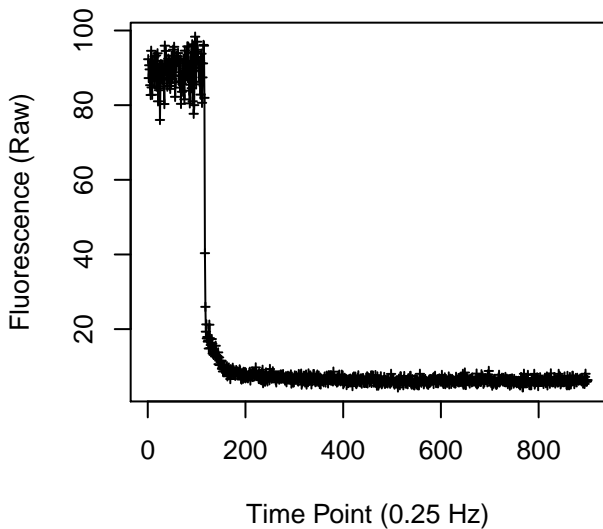

**Cell 150**

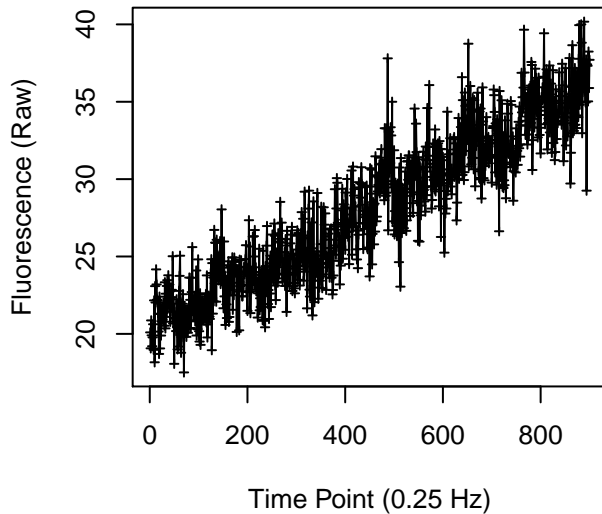

**Cell 151**

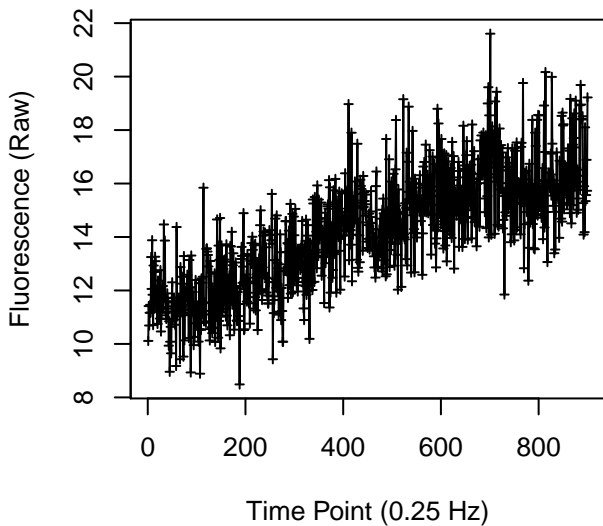

**Cell 152**

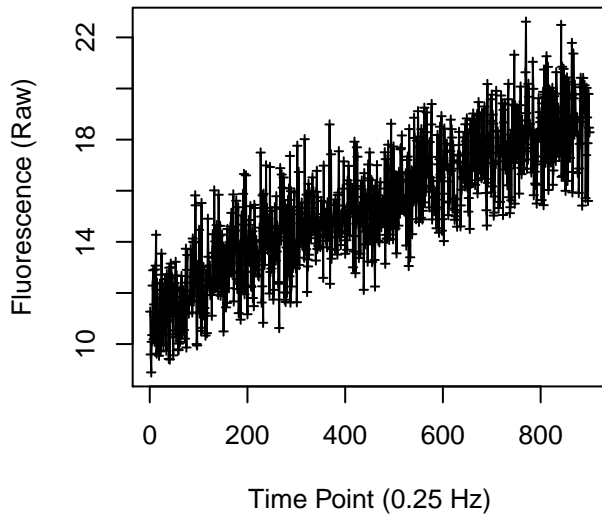

**Cell 153**

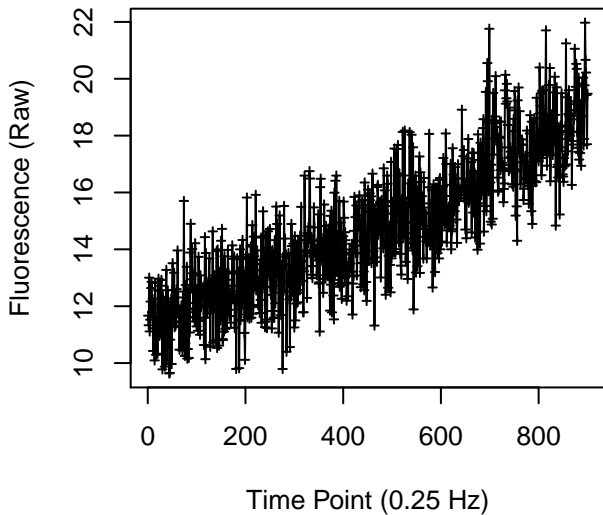

**Cell 154**

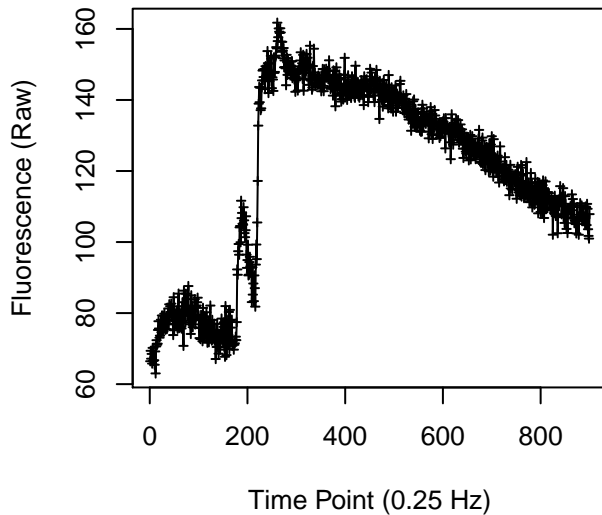

**Cell 155**

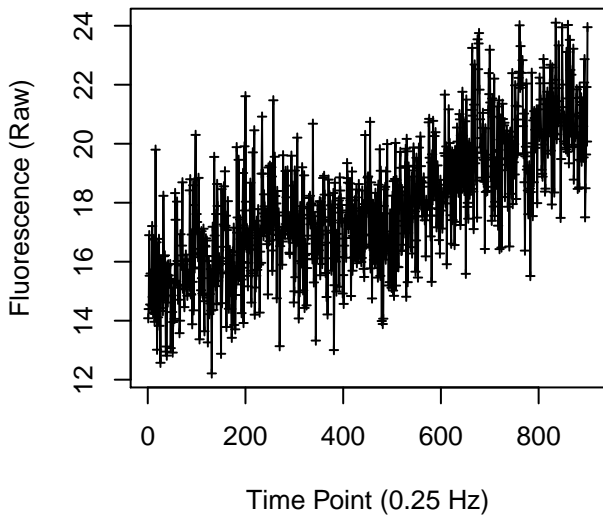

**Cell 156**

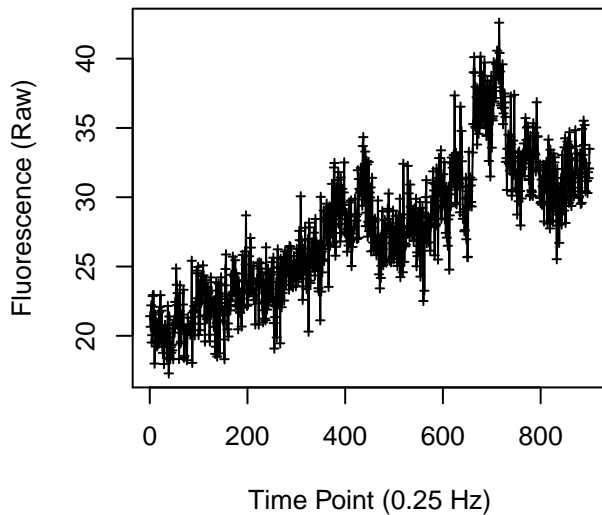

**Cell 157**

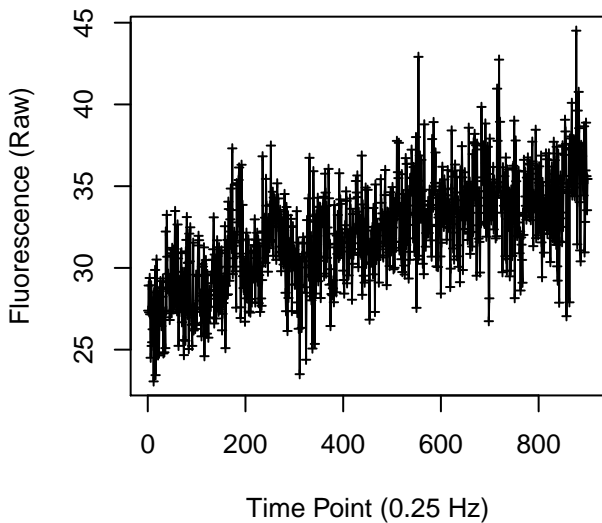

**Cell 158**

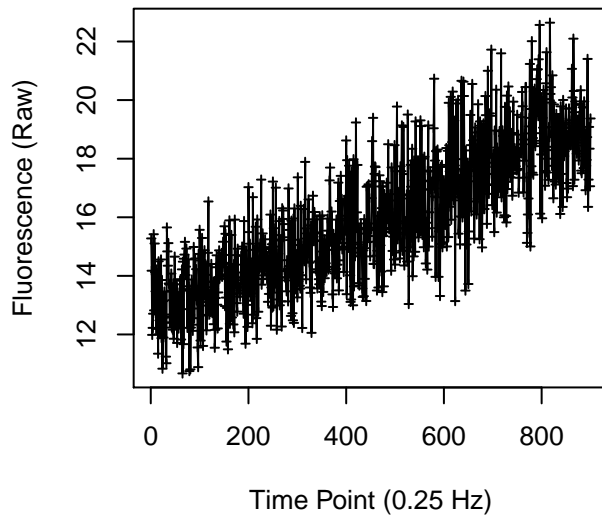

**Cell 159**

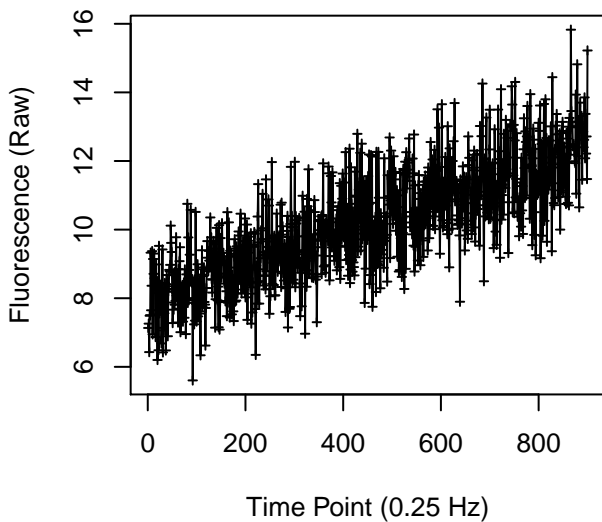

**Cell 160**

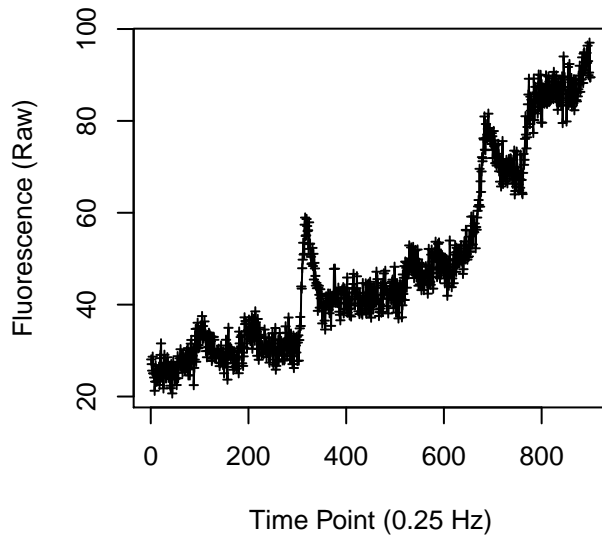

**Cell 161**

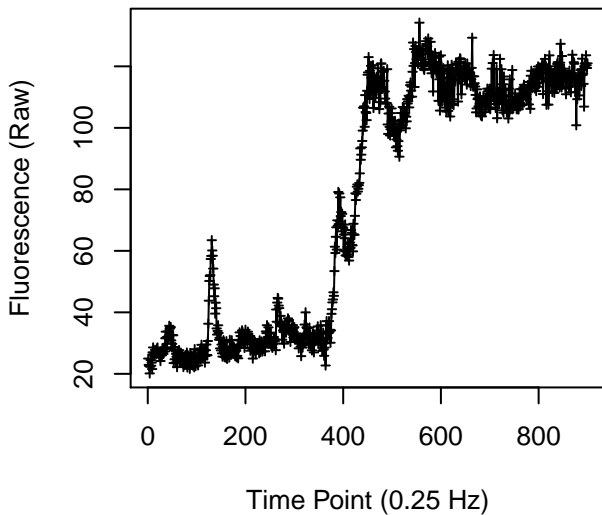

**Cell 162**

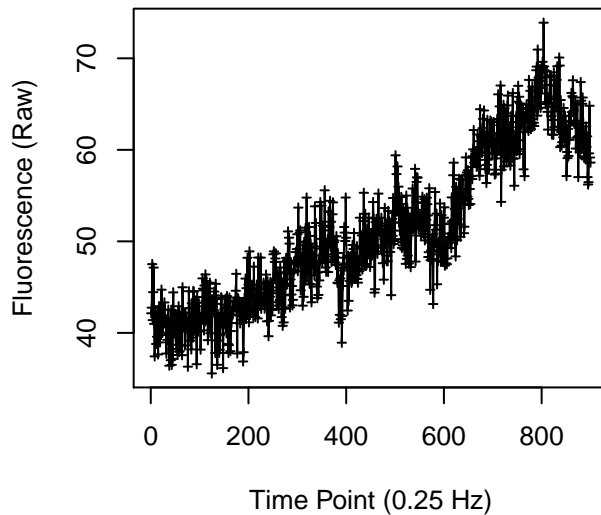

**Cell 163**

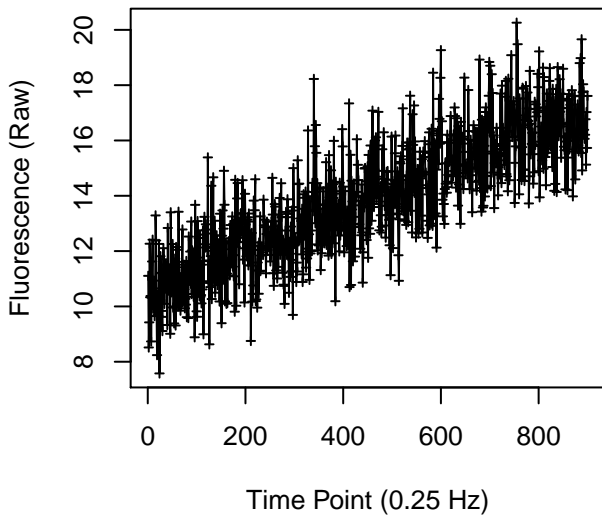

**Cell 164**

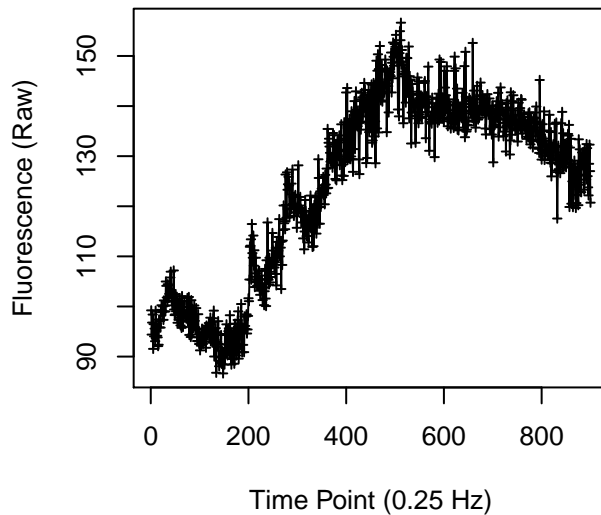

**Cell 165**

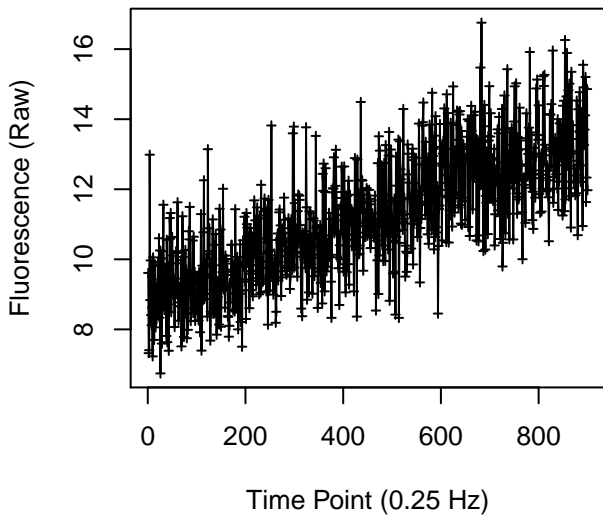

**Cell 166**

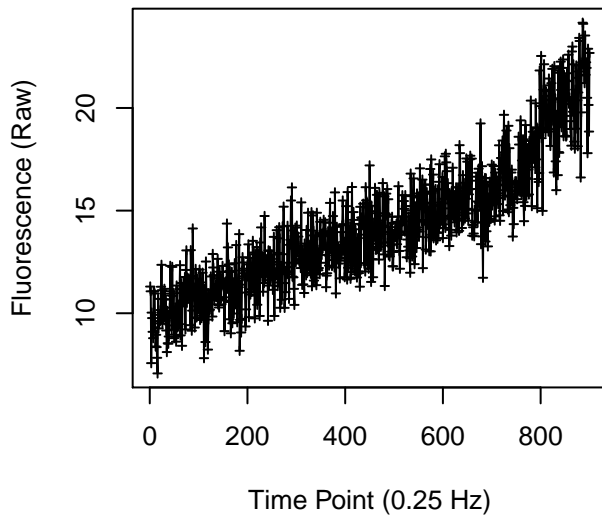

**Cell 167**

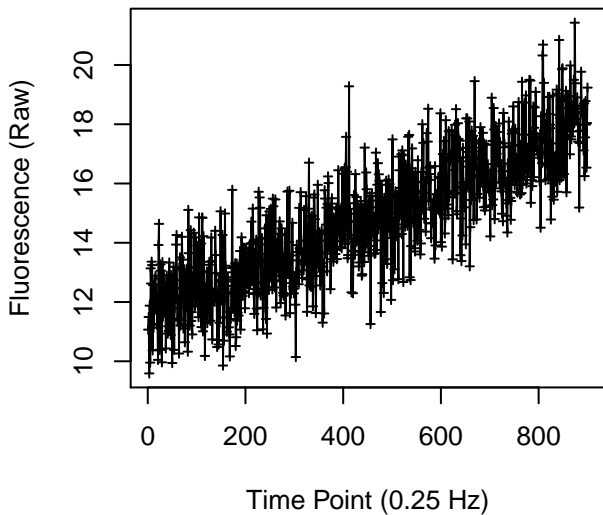

**Cell 168**

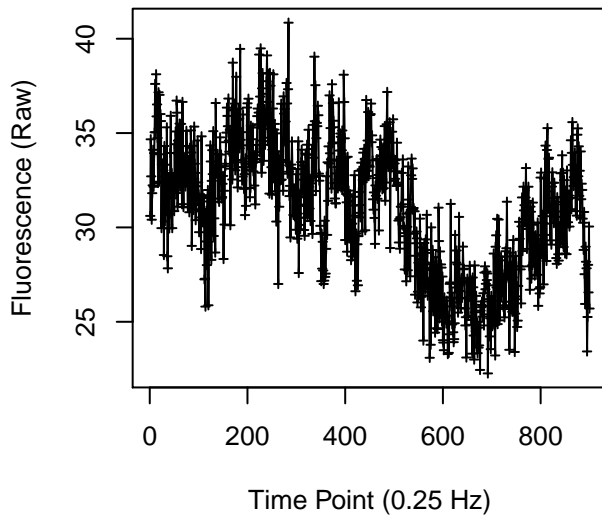



**Cell 169**

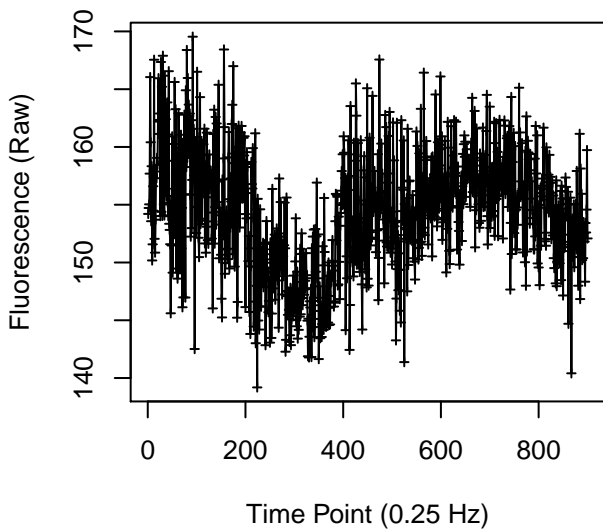

**Cell 170**

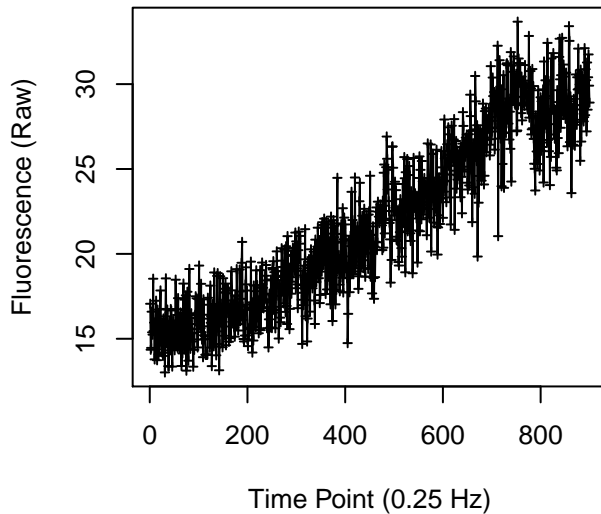

**Cell 171**

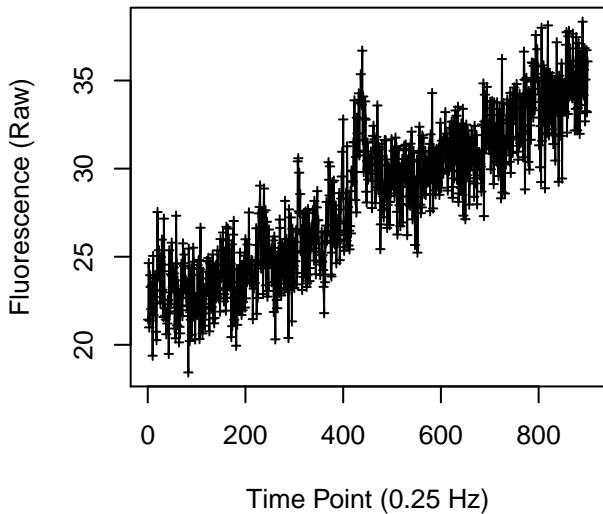

**Cell 172**

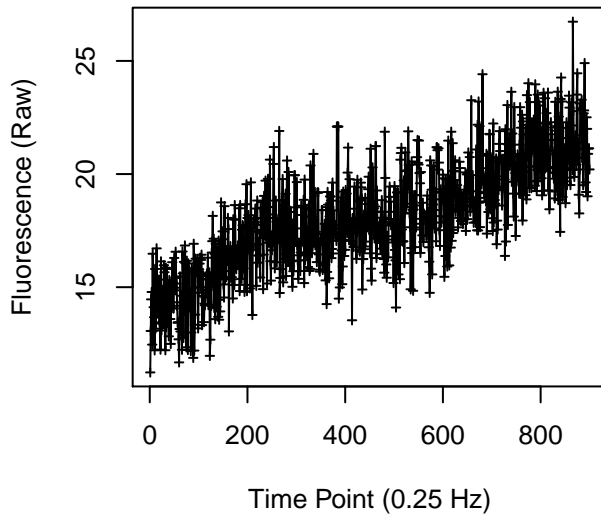

**Cell 173**

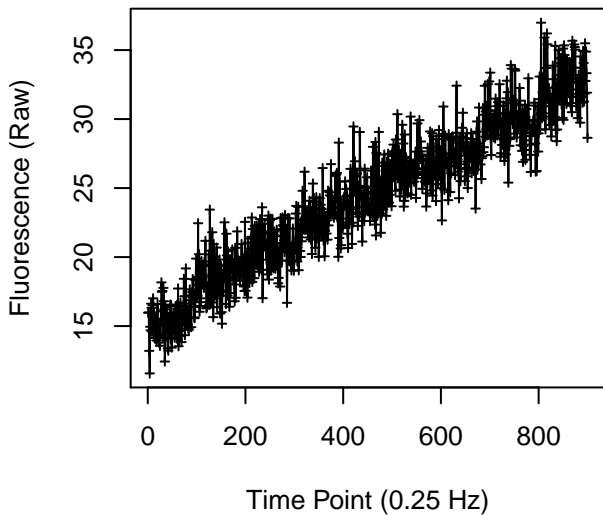

**Cell 174**

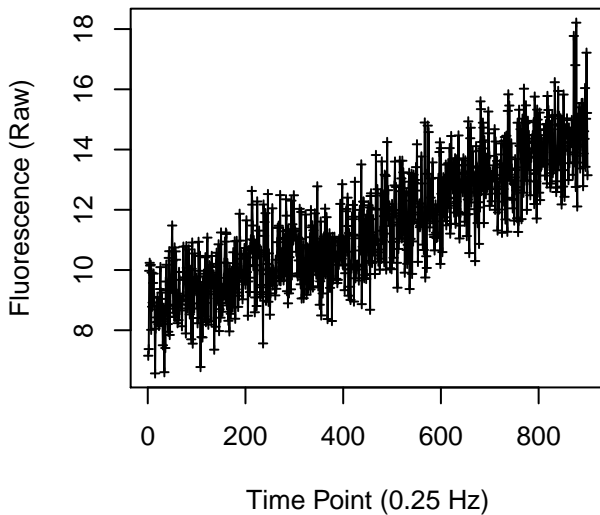

**Cell 175**

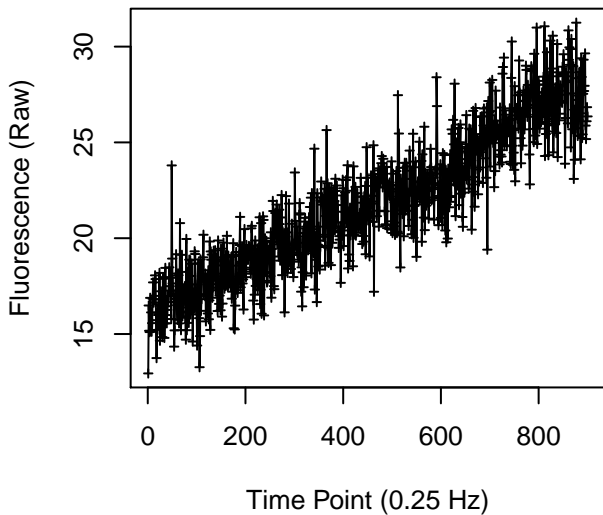

**Cell 176**

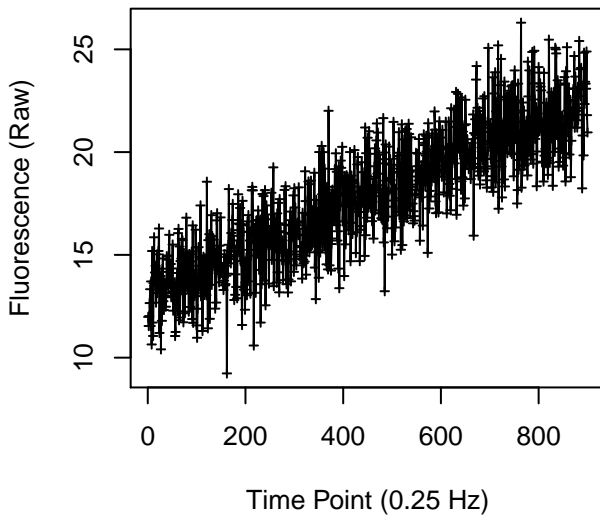

**Cell 177**

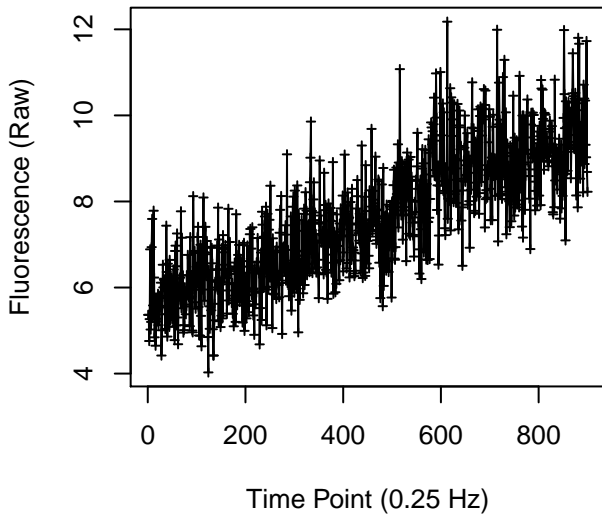

**Cell 178**

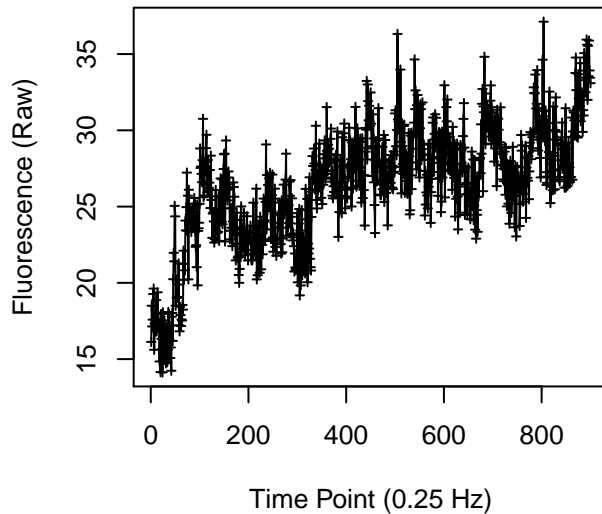

**Cell 179**

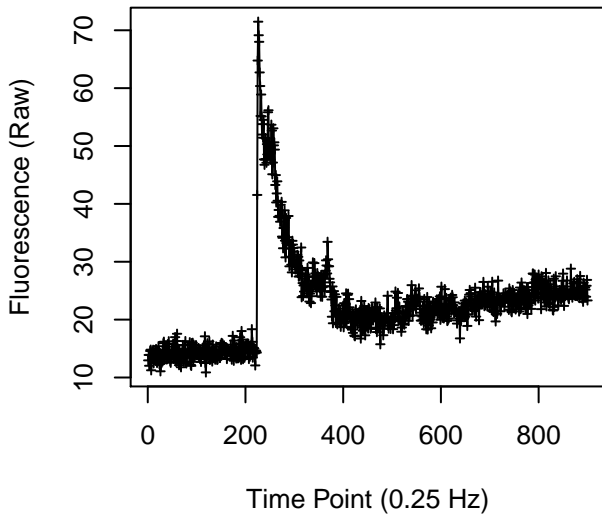

**Cell 180**

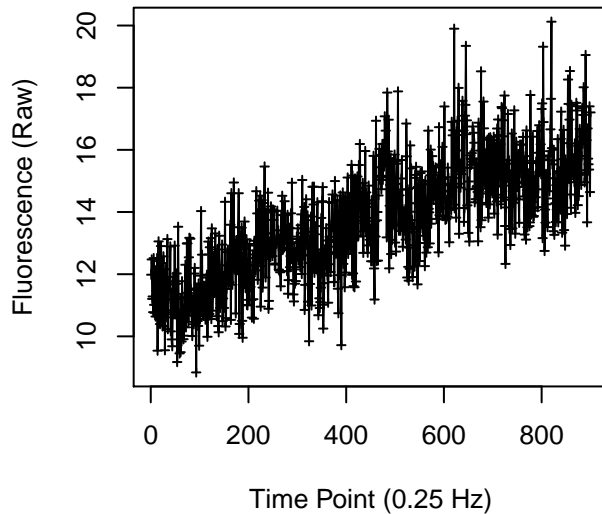

**Cell 181**

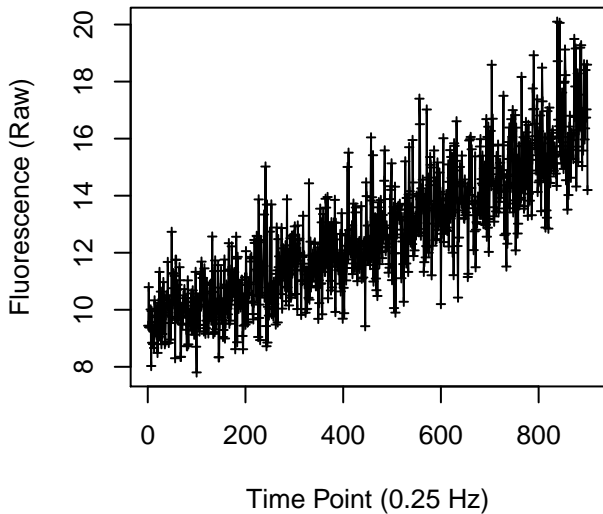

**Cell 182**

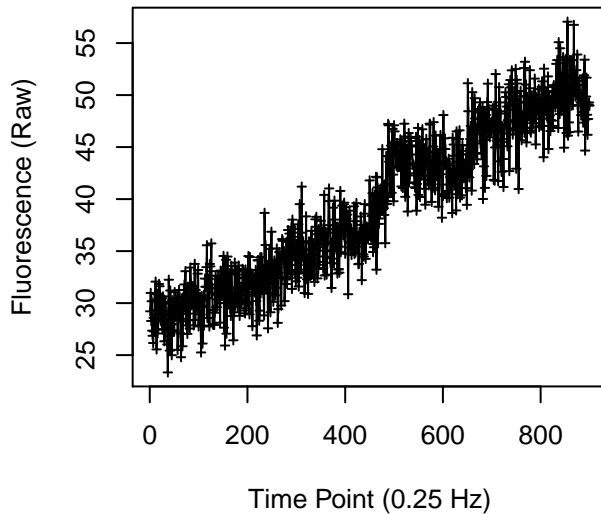

**Cell 183**

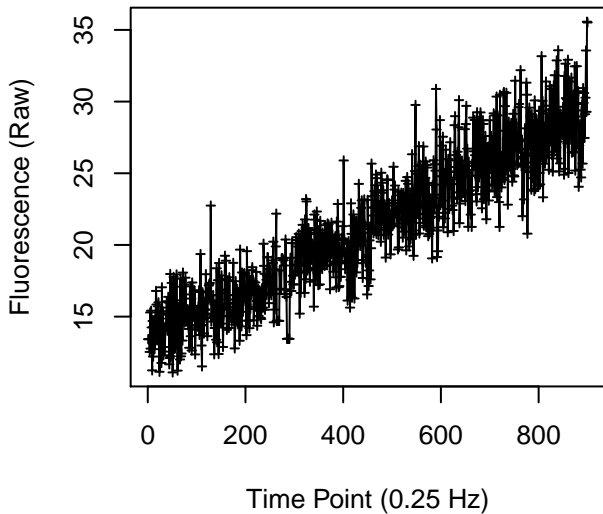

**Cell 184**

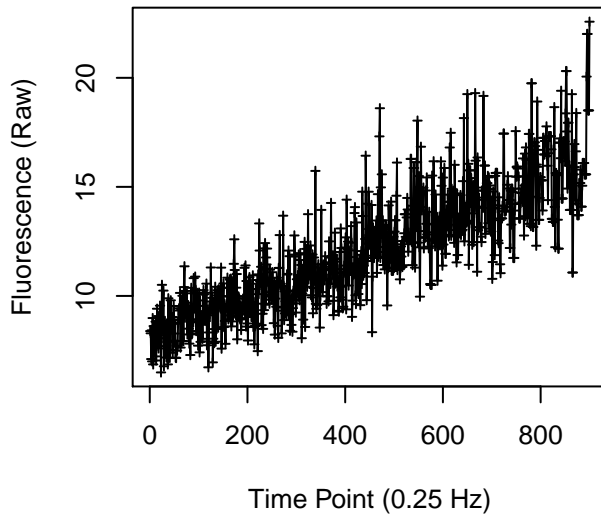

**Cell 185**

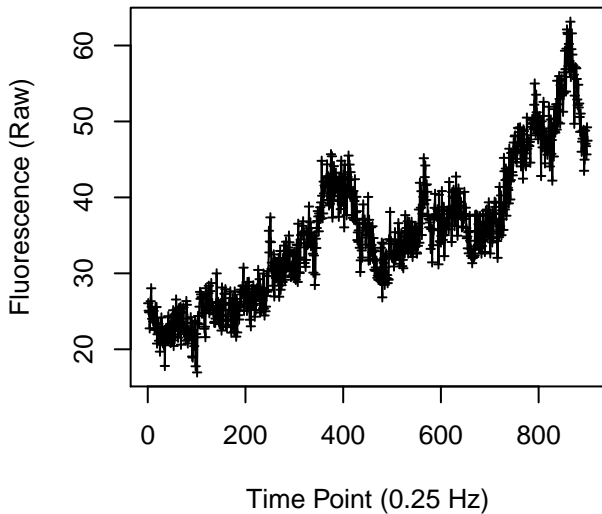

**Cell 186**

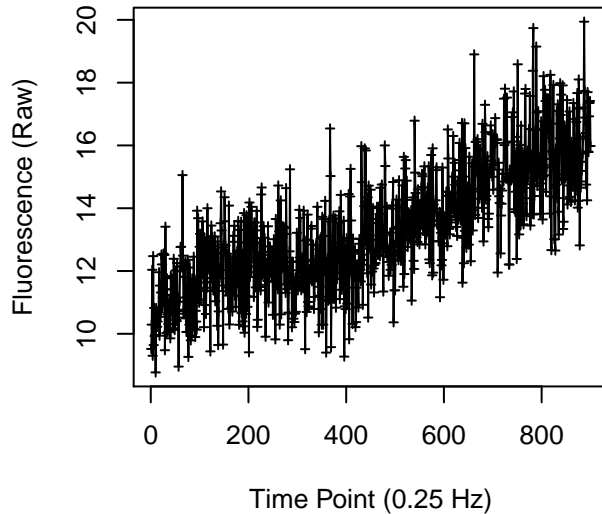

**Cell 187**

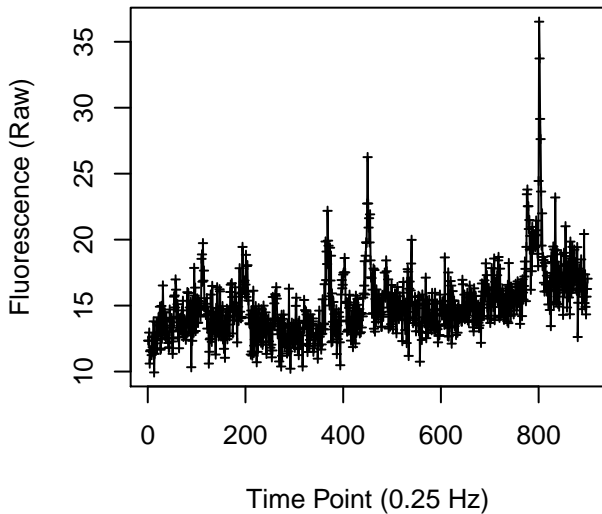

**Cell 188**

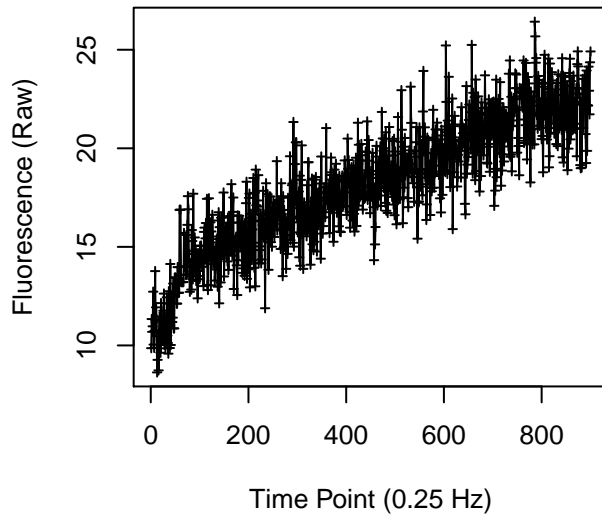

**Cell 189**

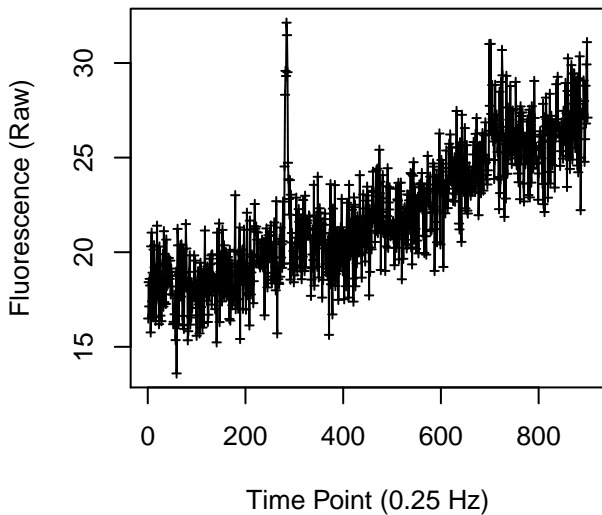

**Cell 190**

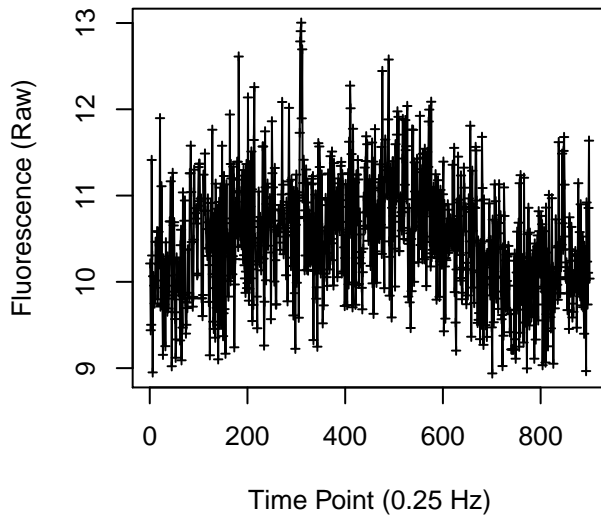

**Cell 191**

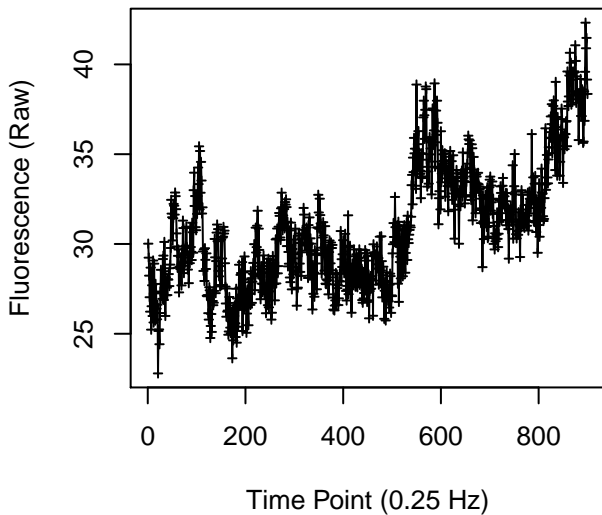

**Cell 192**

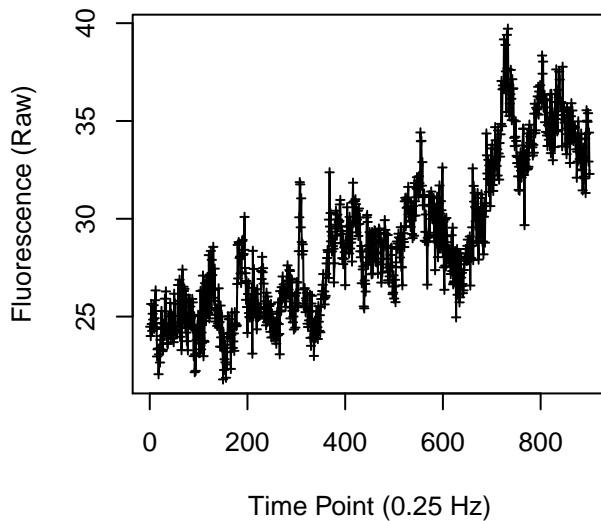

**Cell 193**

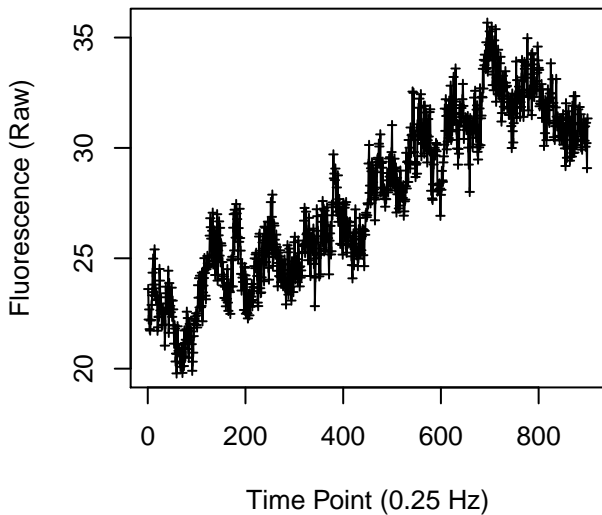

**Cell 194**

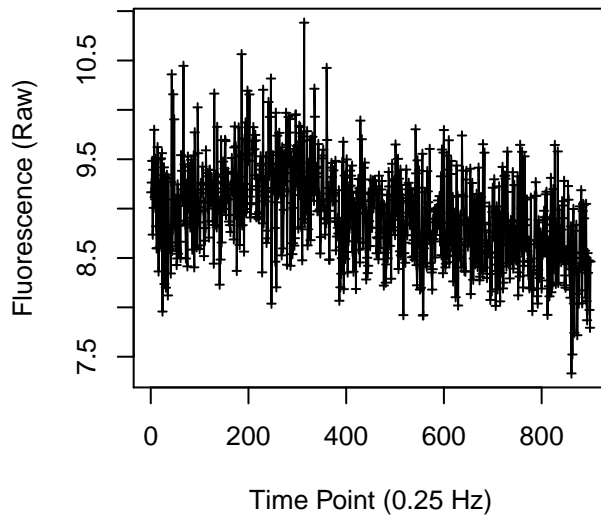

**Cell 195**

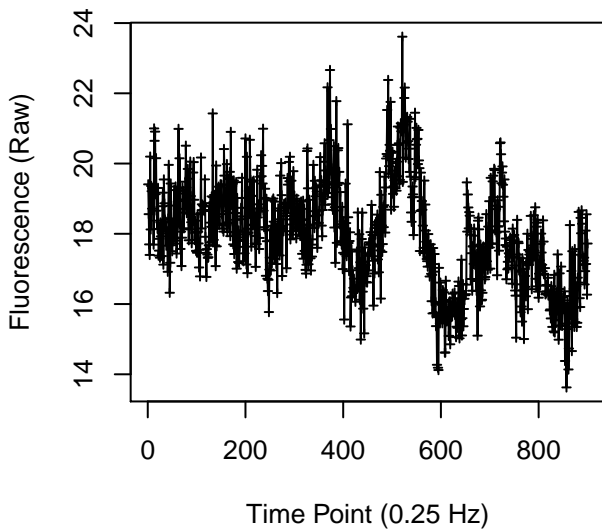

**Cell 196**

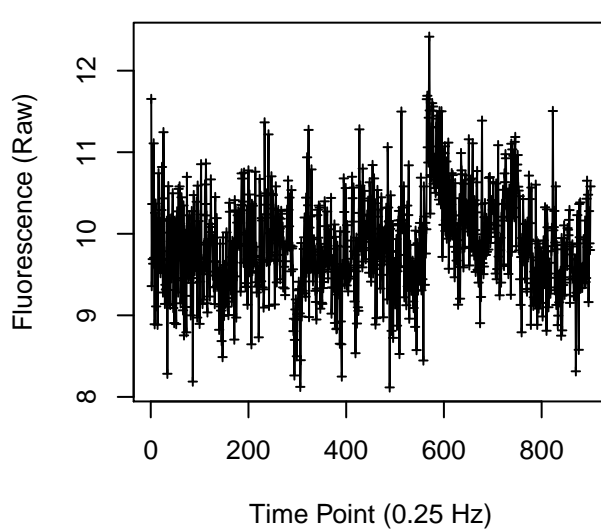

**Cell 197**

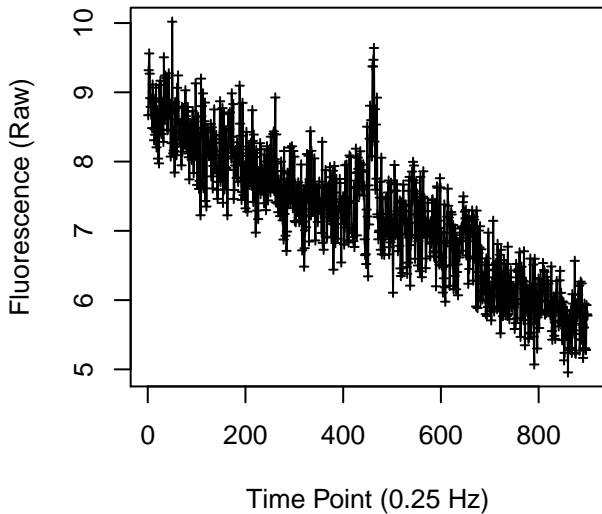

**Cell 198**

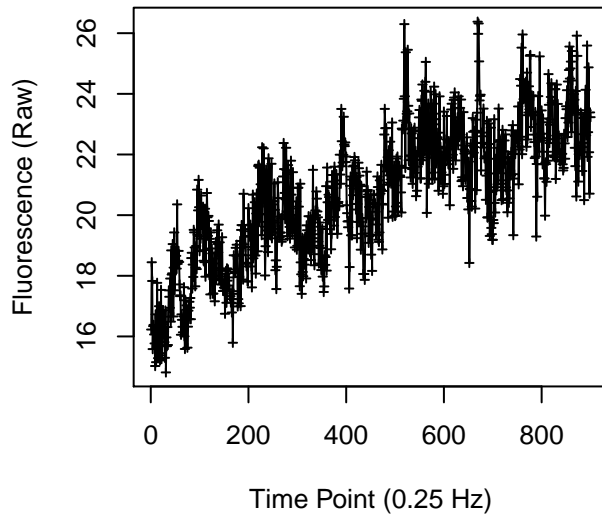

**Cell 199**

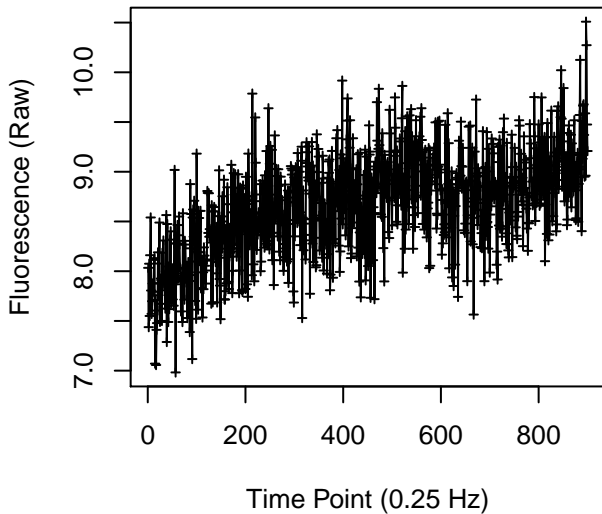

**Cell 200**

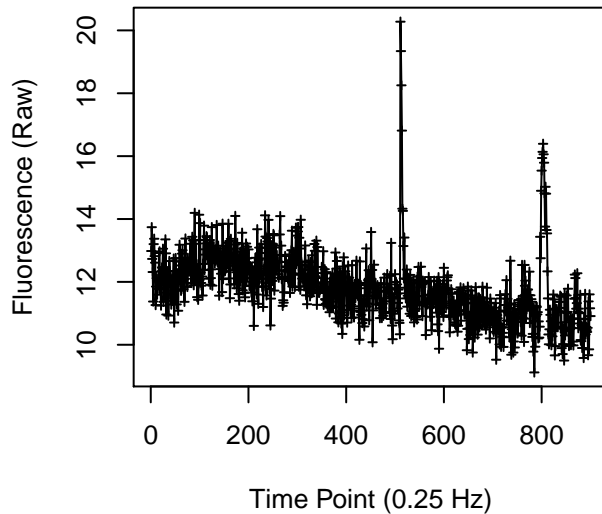



**Cell 201**

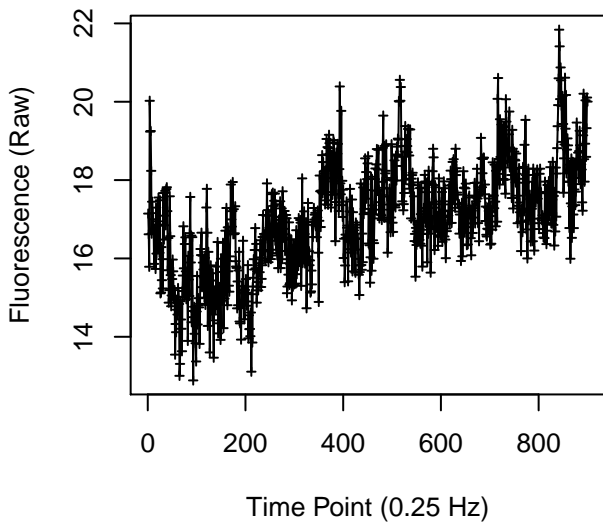

**Cell 202**

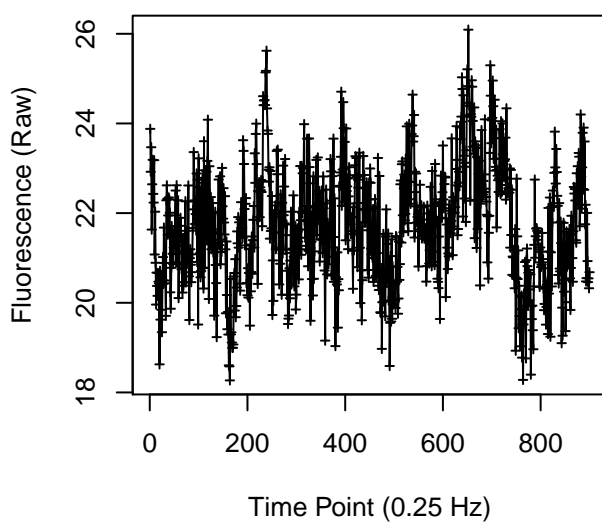

**Cell 203**

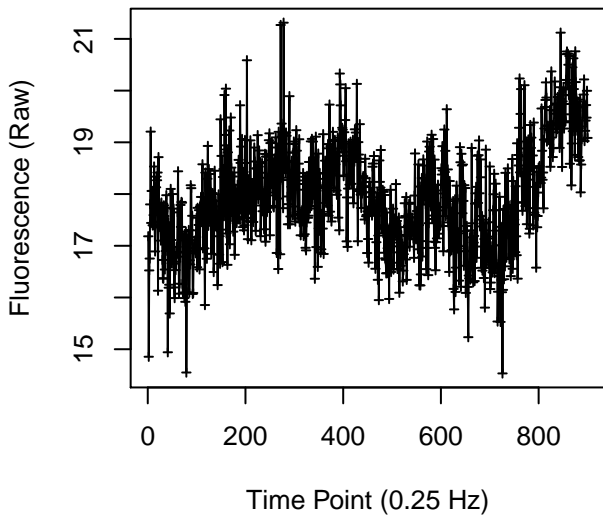

**Cell 204**

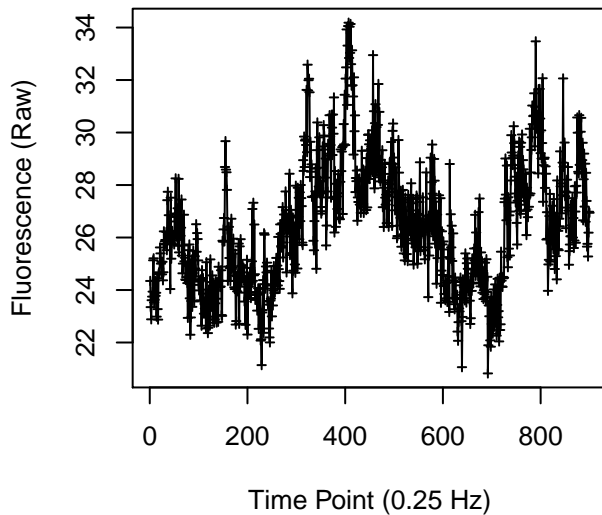

**Cell 205**

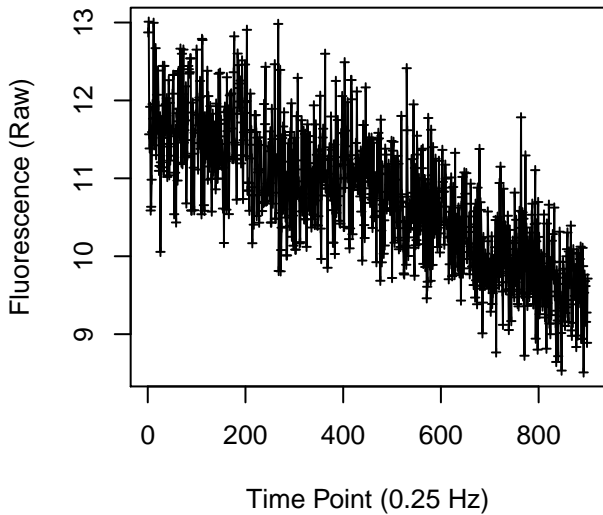

**Cell 206**

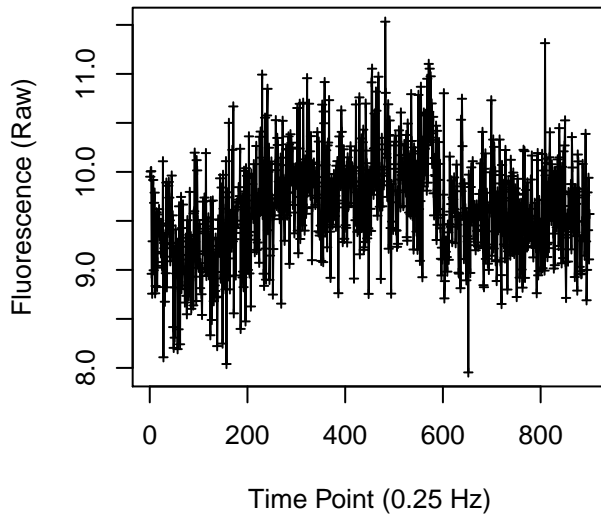

**Cell 207**

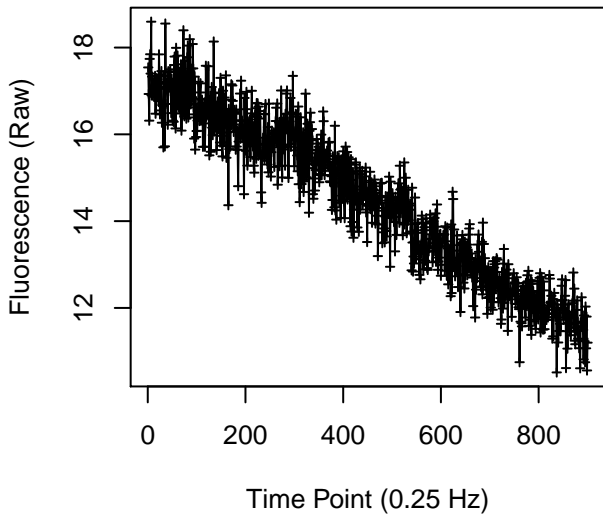

**Cell 208**

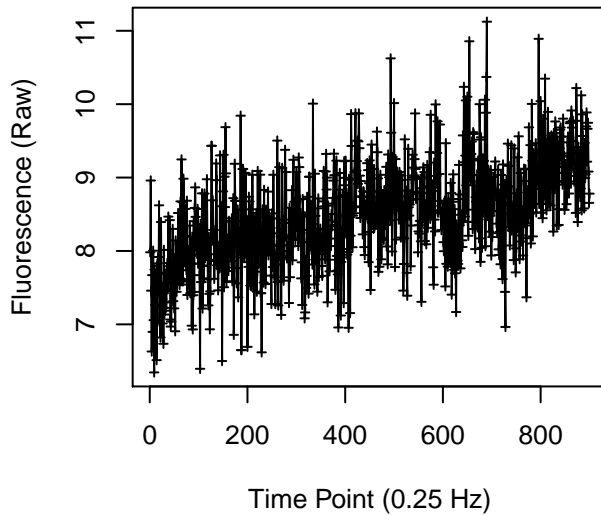

**Cell 209**

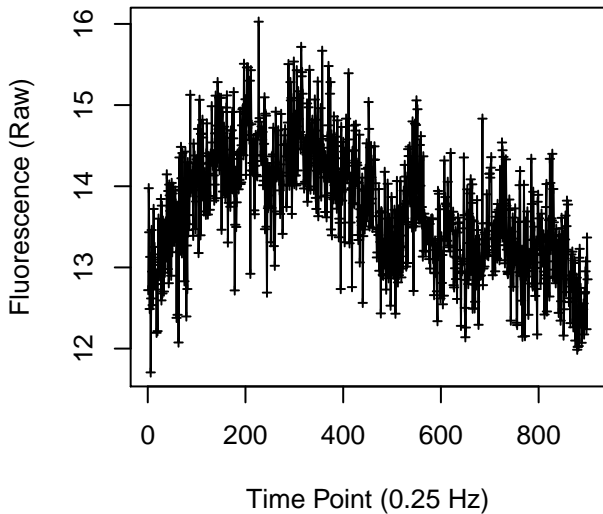

**Cell 210**

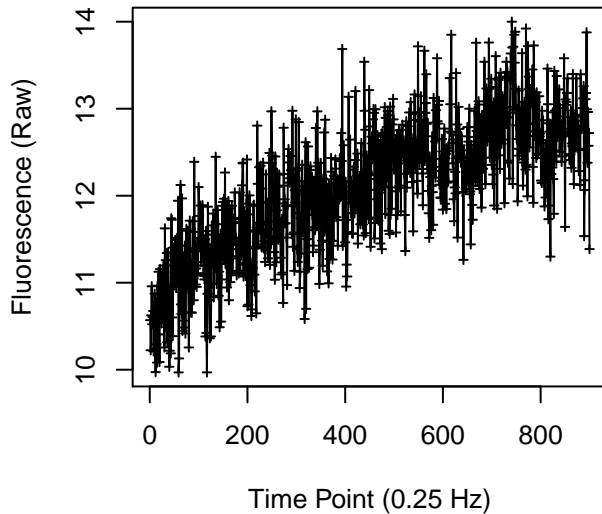

**Cell 211**

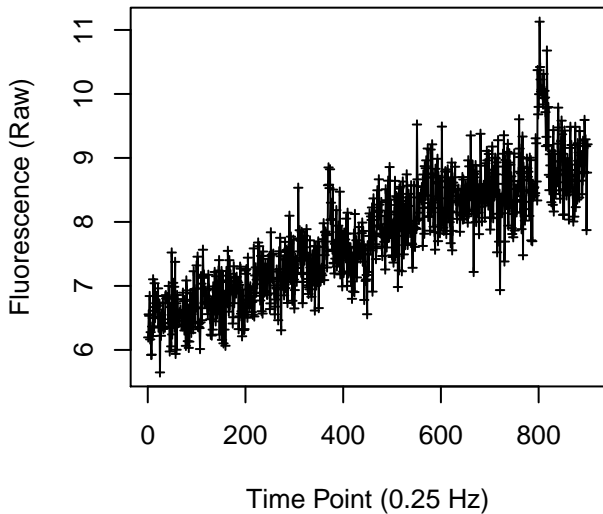

**Cell 212**

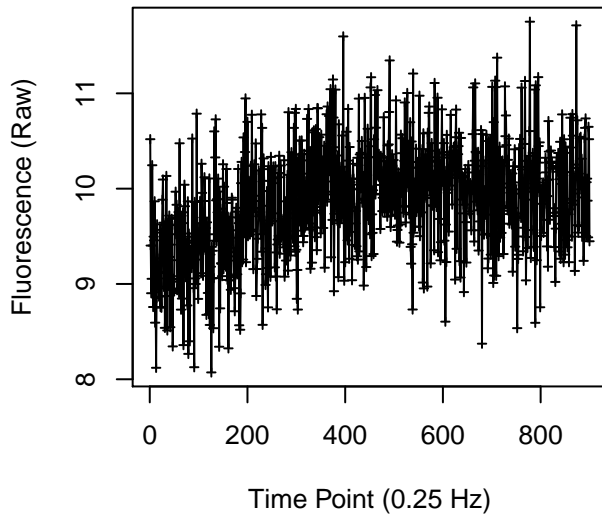

**Cell 213**

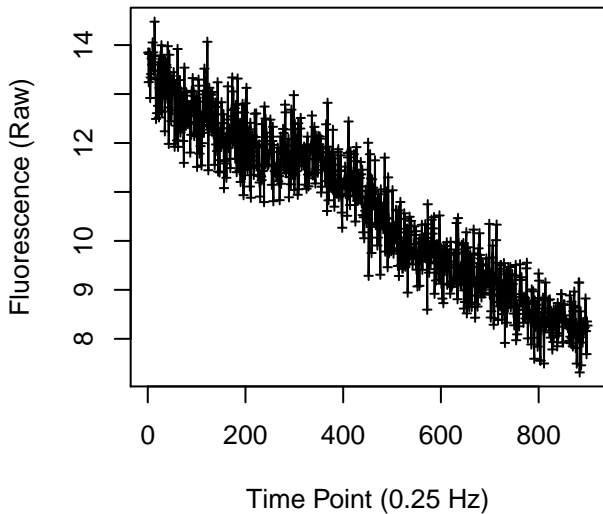

**Cell 214**

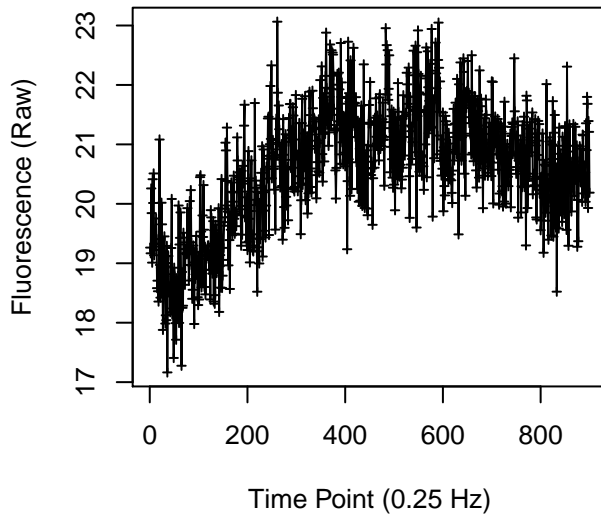

**Cell 215**

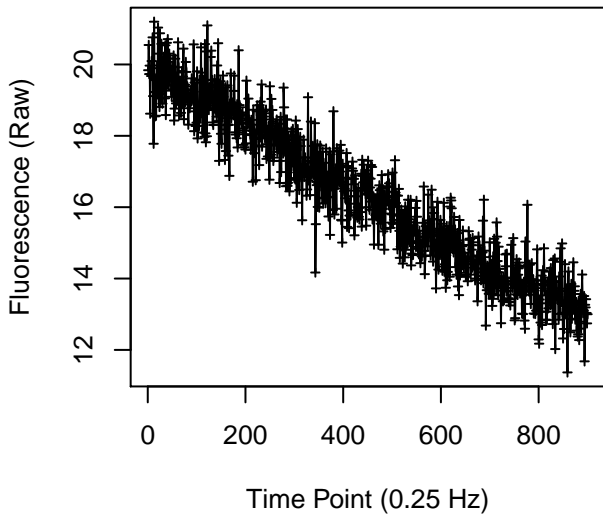

**Cell 216**

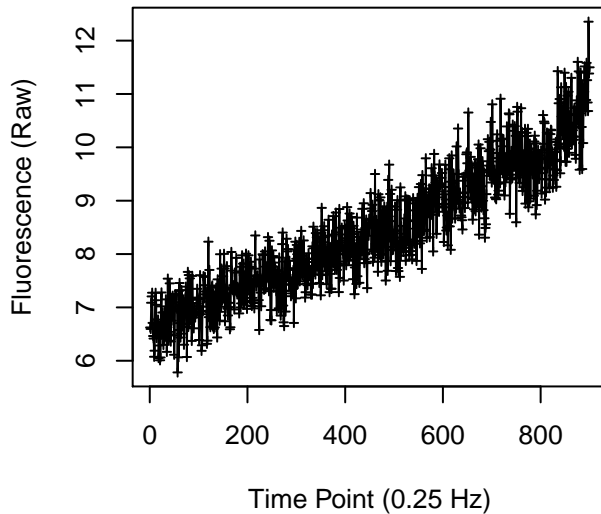

**Cell 217**

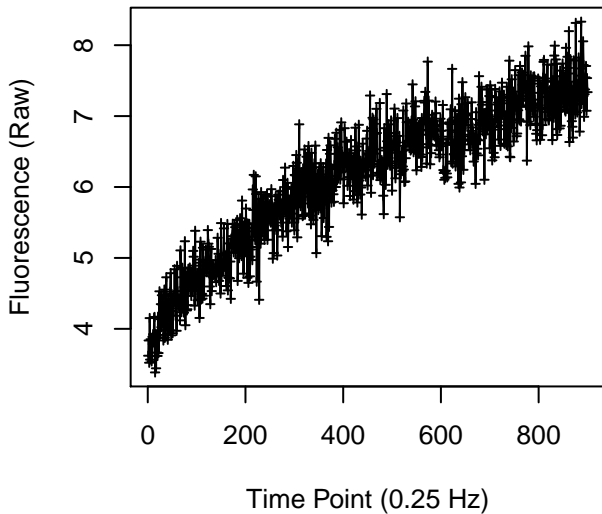

**Cell 218**

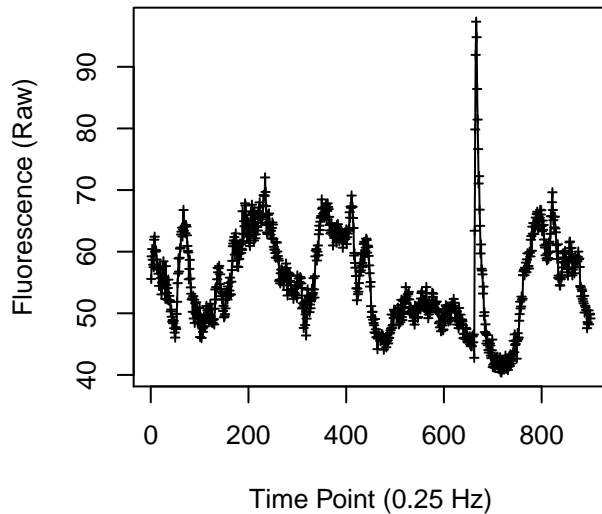

**Cell 219**

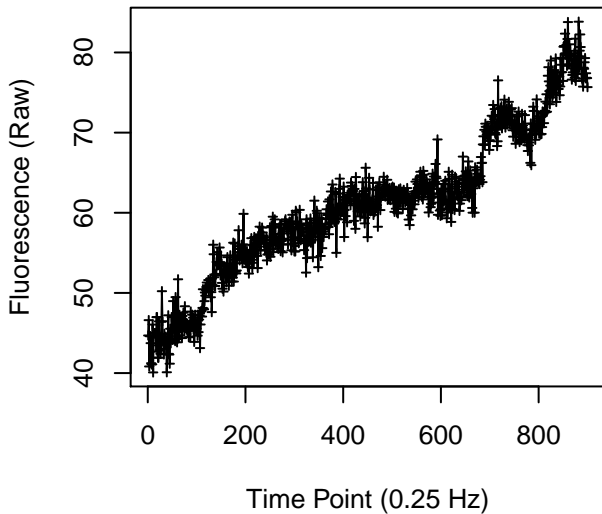

**Cell 220**

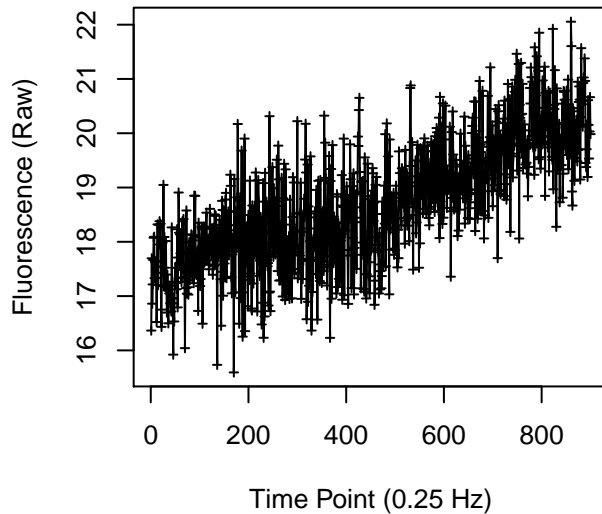

**Cell 221**

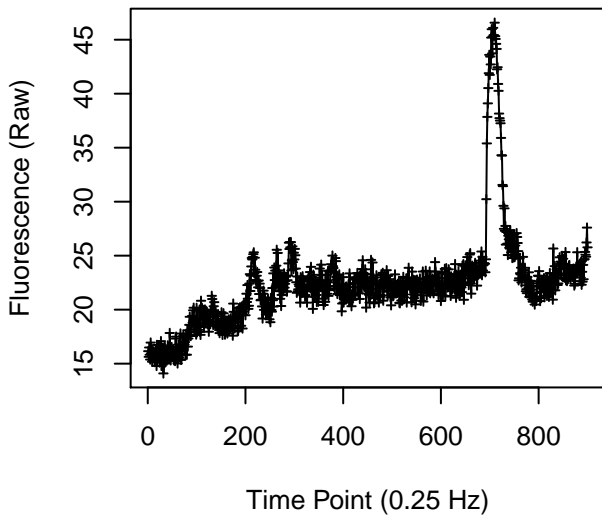

**Cell 222**

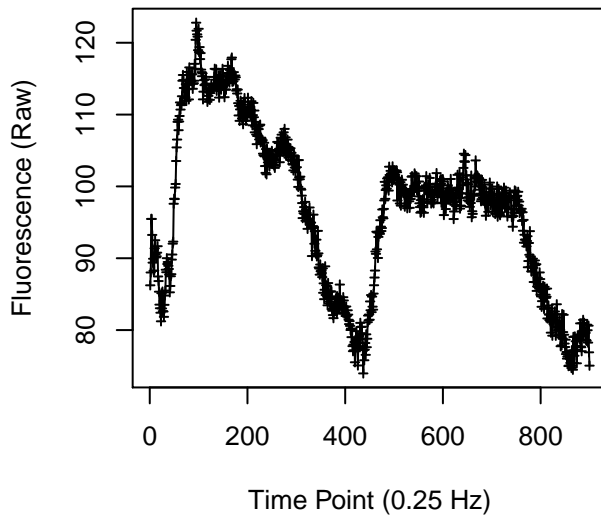

**Cell 223**

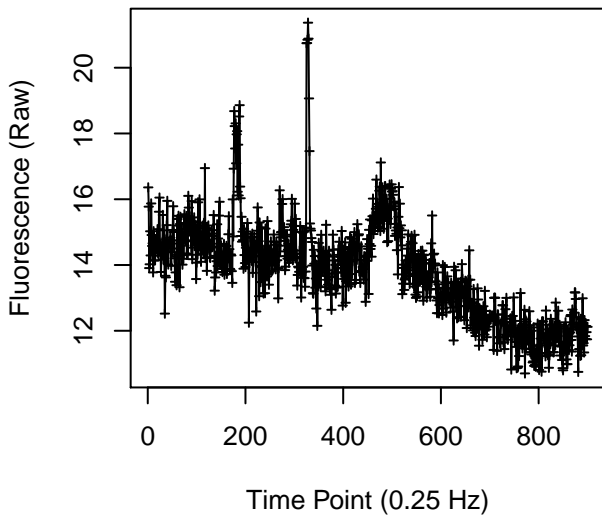

**Cell 224**

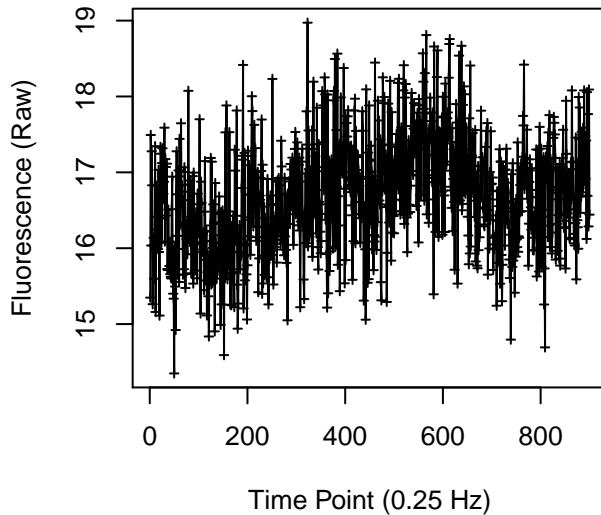

**Cell 225**

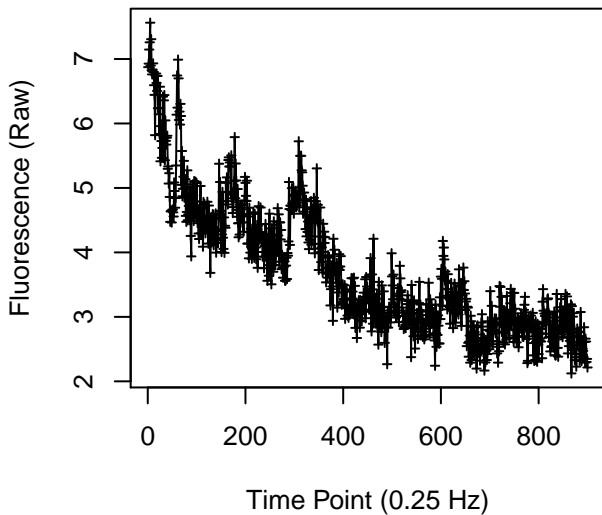

**Cell 226**

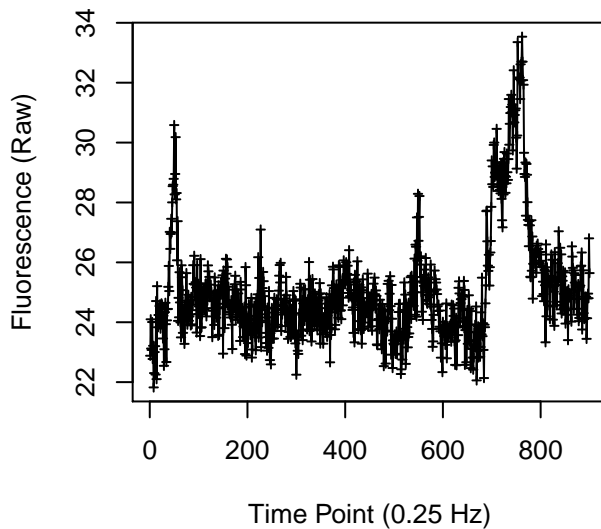

**Cell 227**

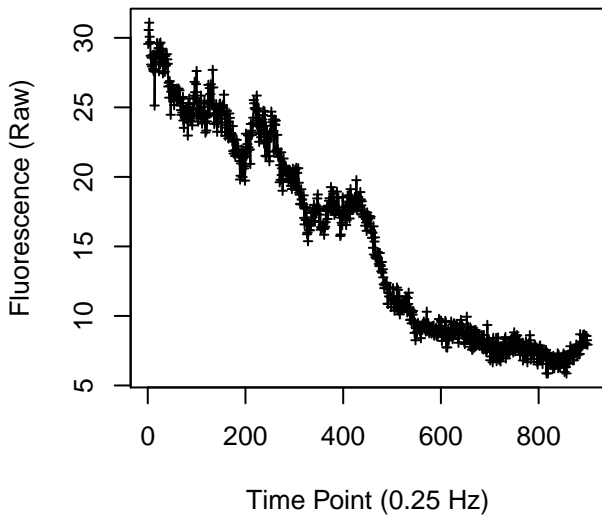

**Cell 228**

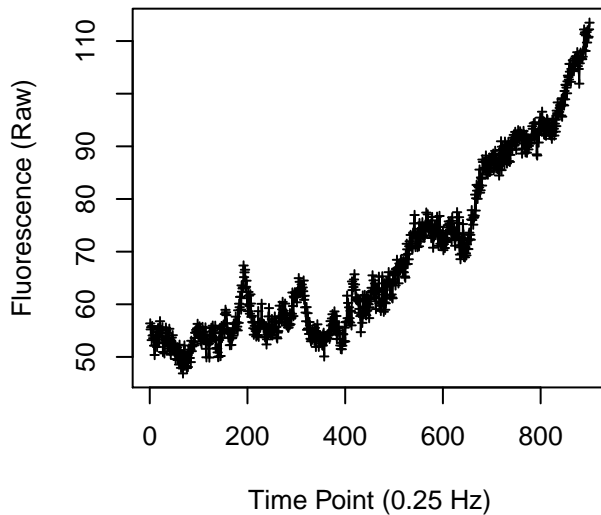

**Cell 229**

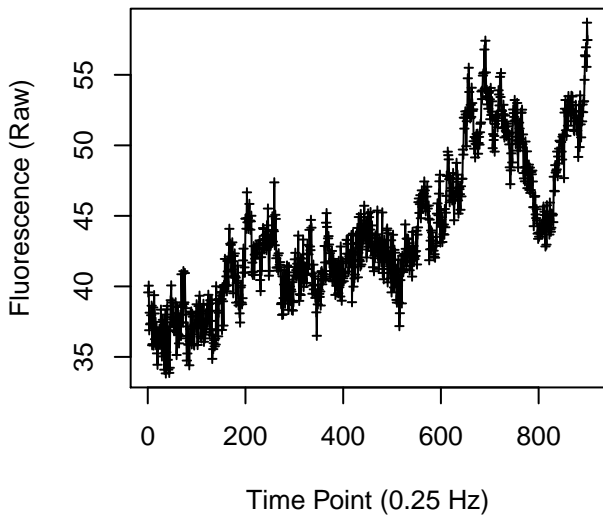

**Cell 230**

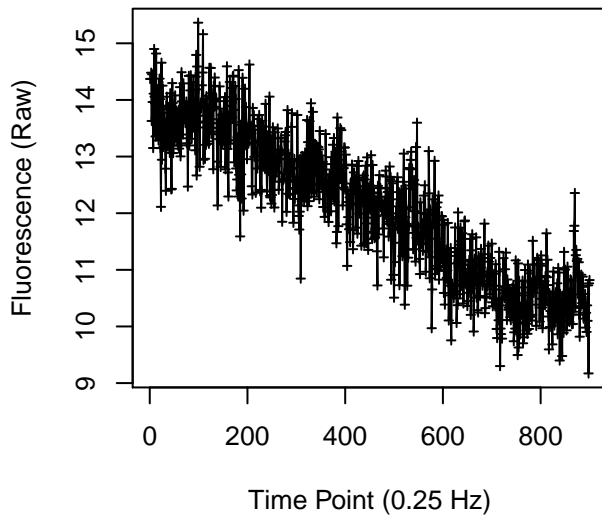

**Cell 231**

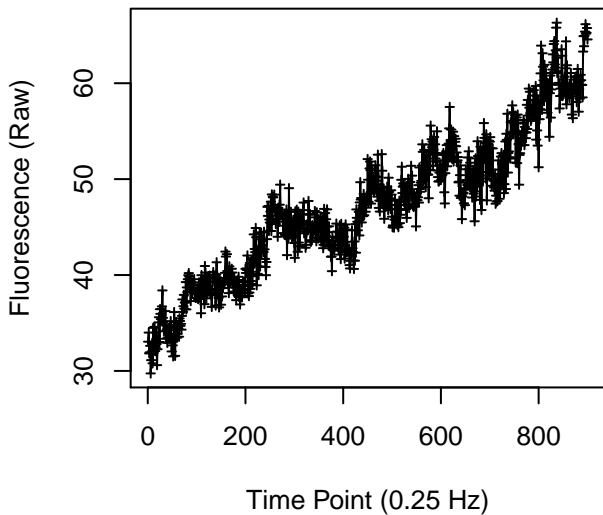

**Cell 232**

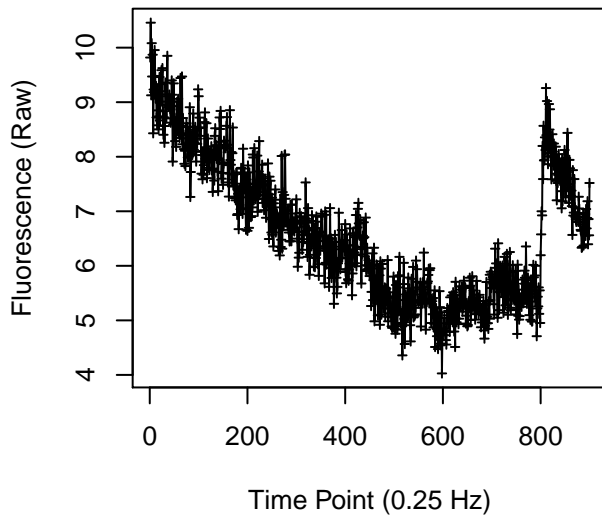



**Cell 233**

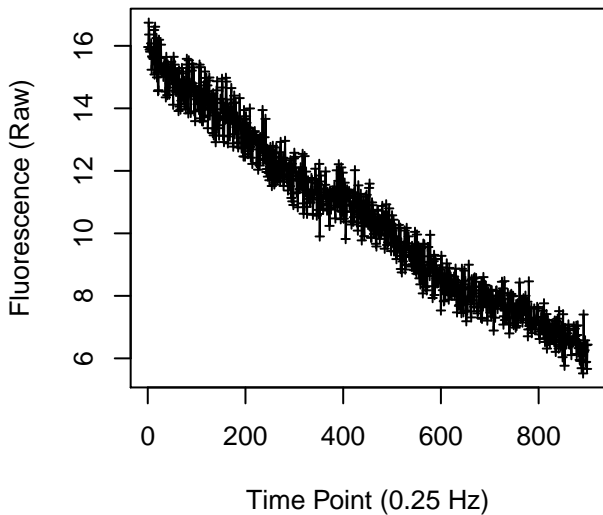

**Cell 234**

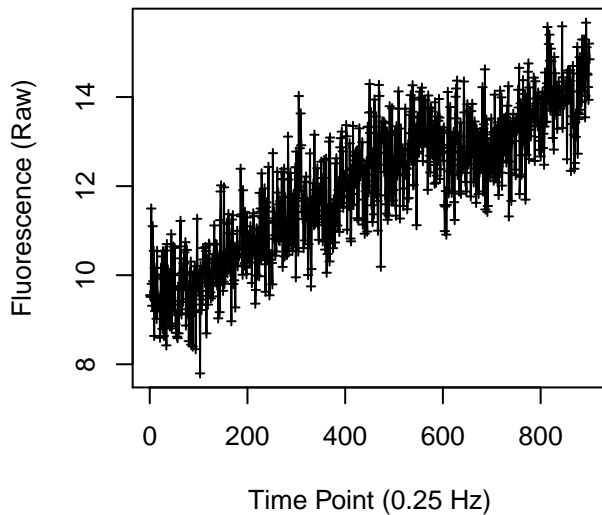

**Cell 235**

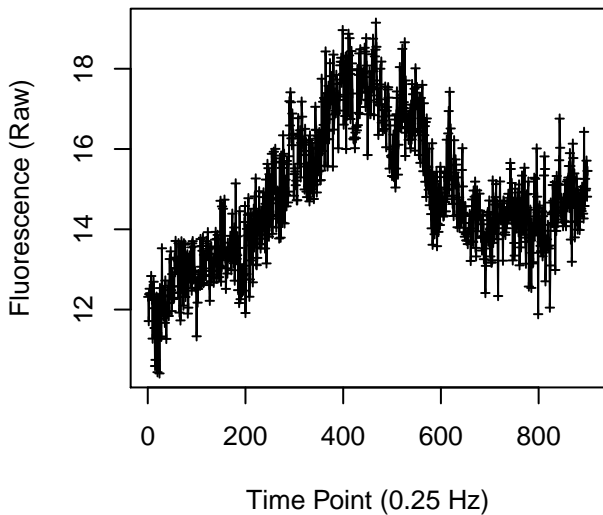

**Cell 236**

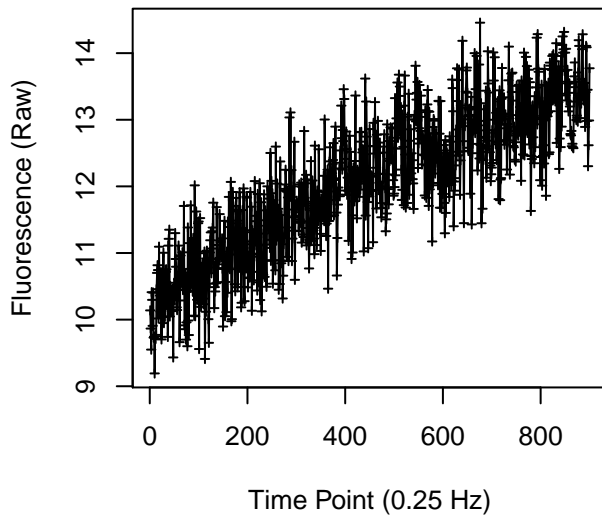

**Cell 237**

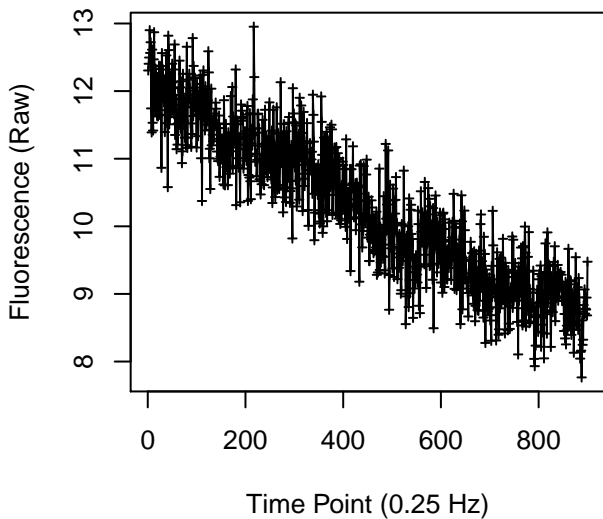

**Cell 238**

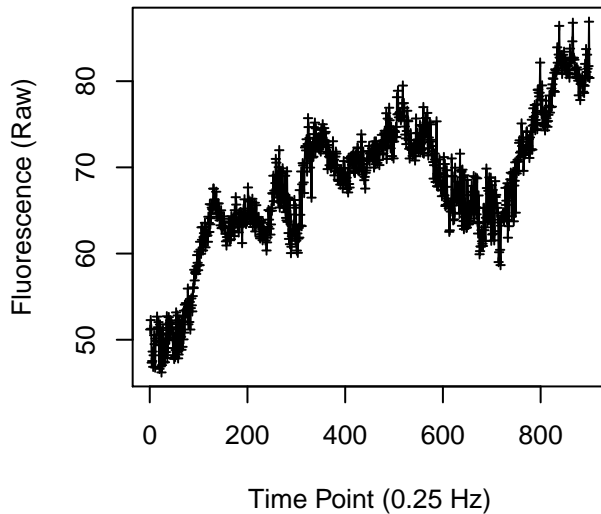

**Cell 239**

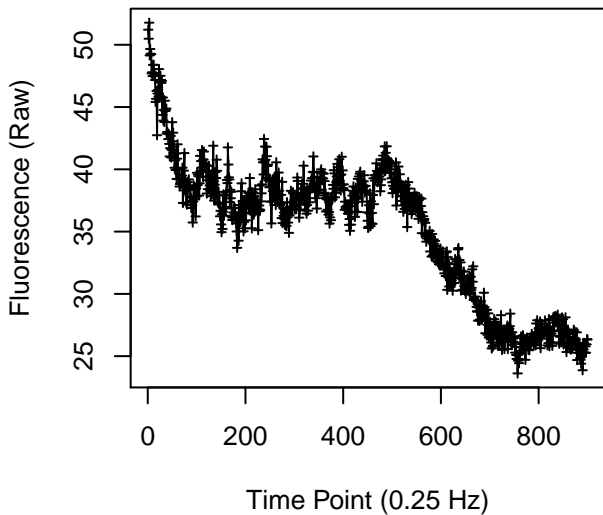

**Cell 240**

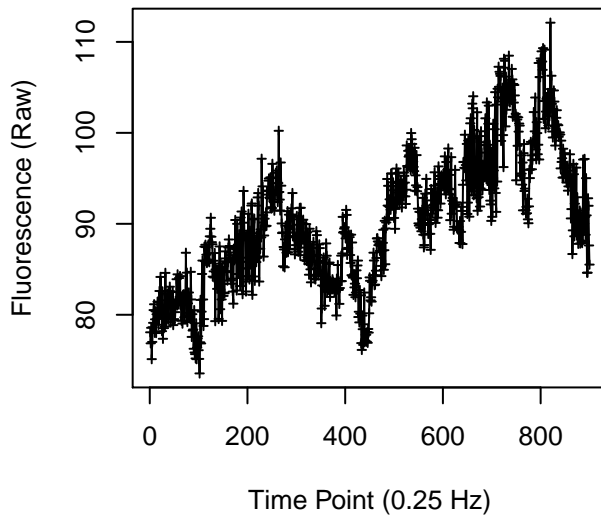

**Cell 241**

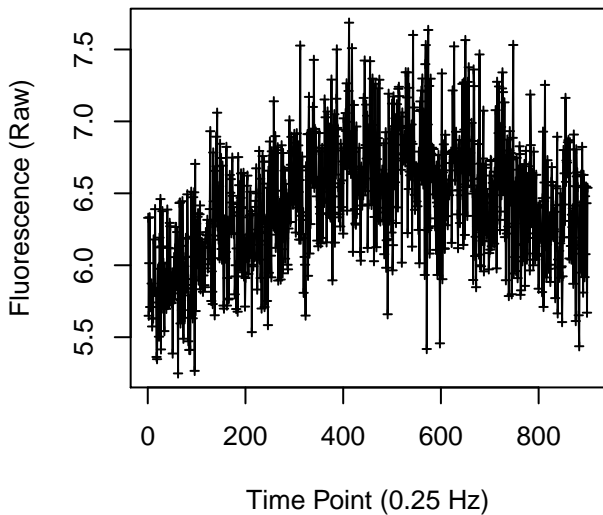

**Cell 242**

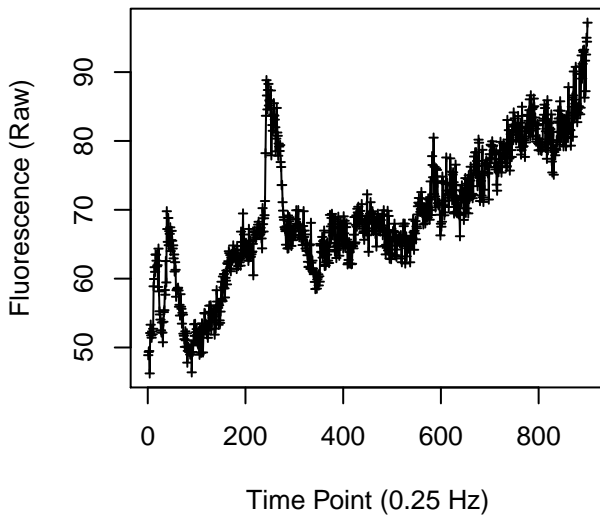

**Cell 243**

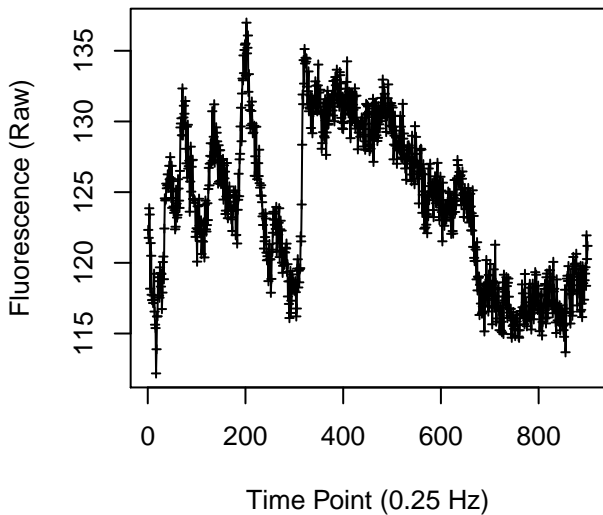

**Cell 244**

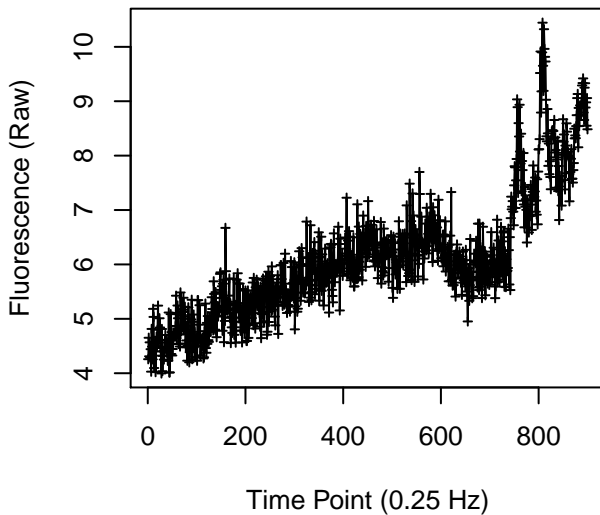

**Cell 245**

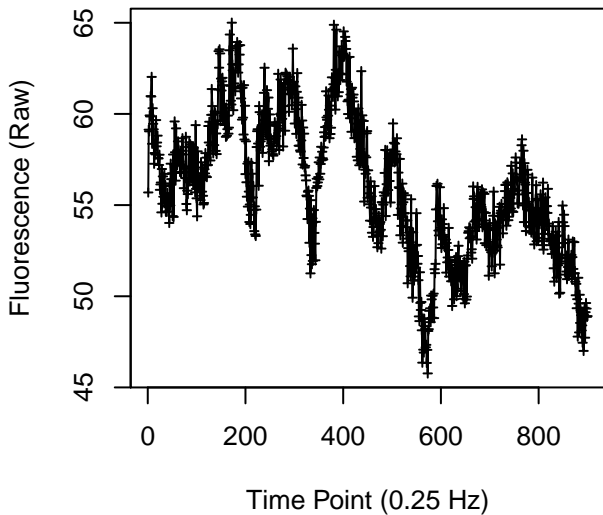

**Cell 246**

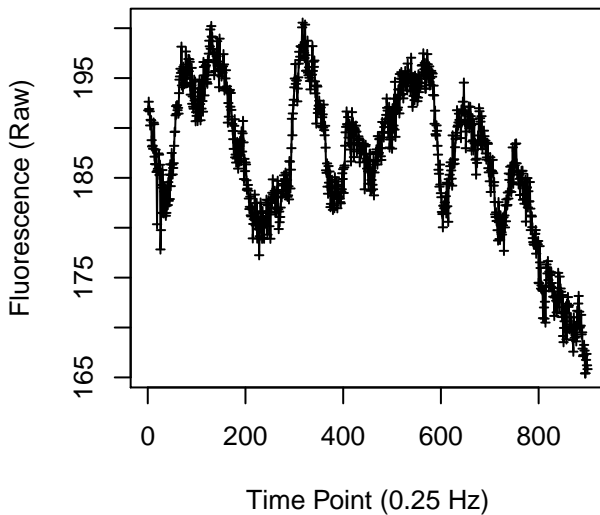

**Cell 247**

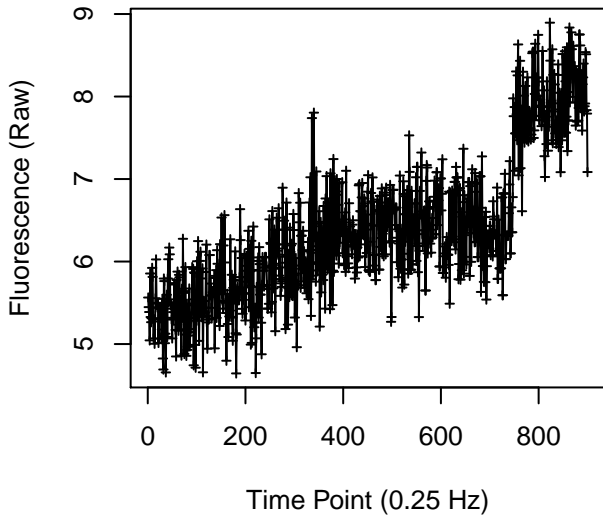

**Cell 248**

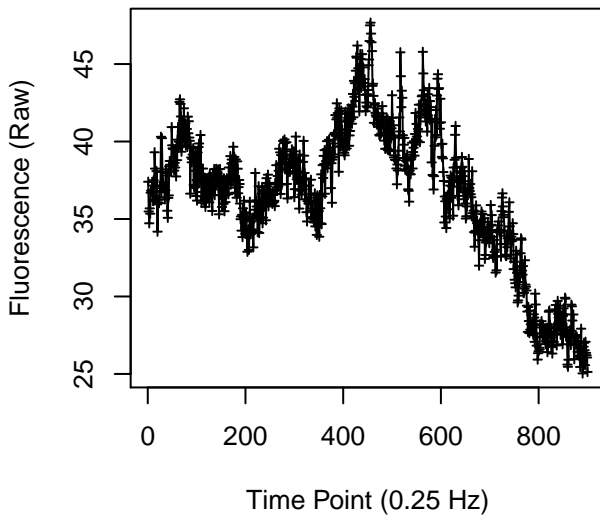

**Cell 249**

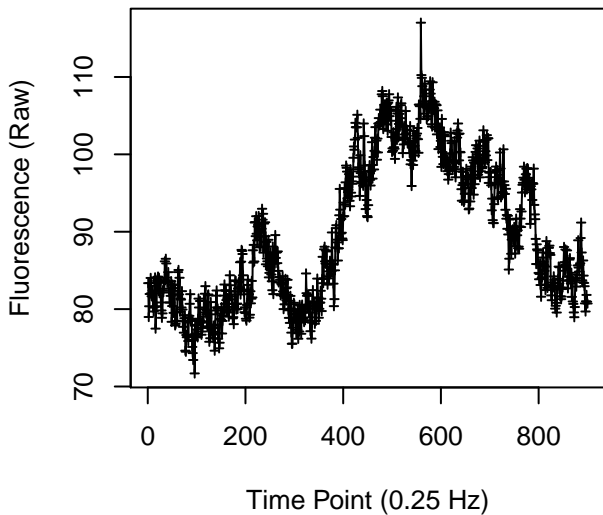

**Cell 250**

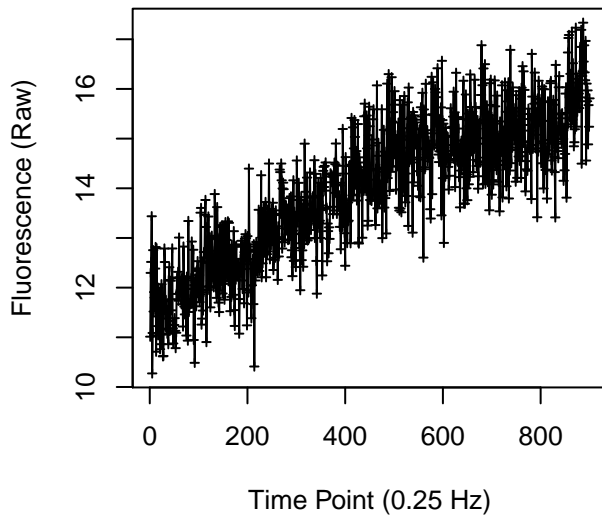

**Cell 251**

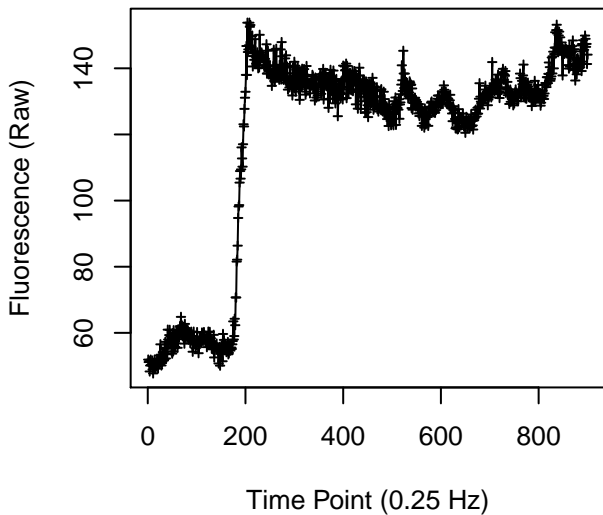

**Cell 252**

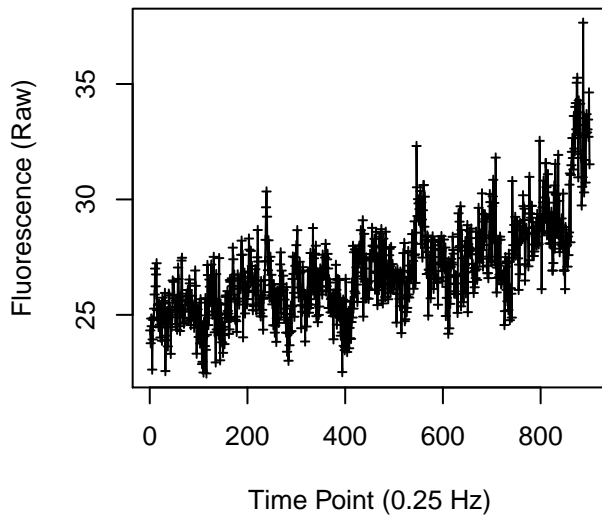

**Cell 253**

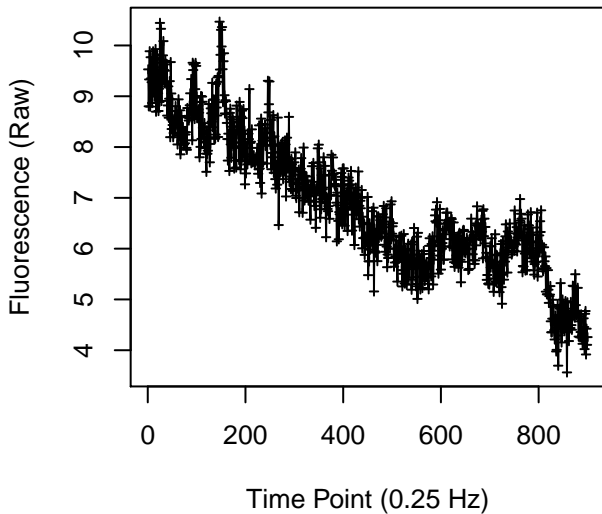

**Cell 254**

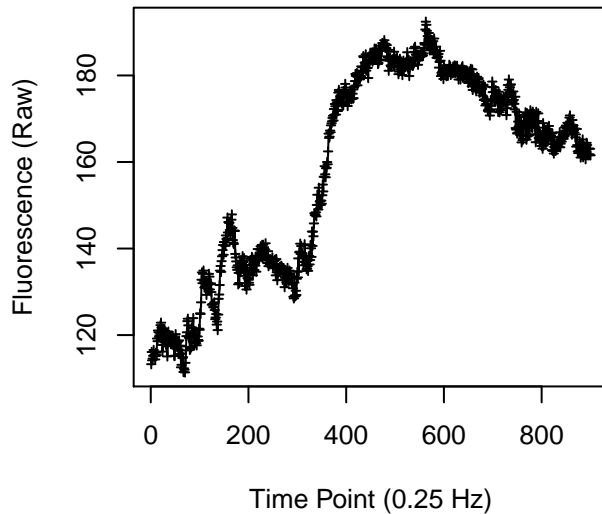

**Cell 255**

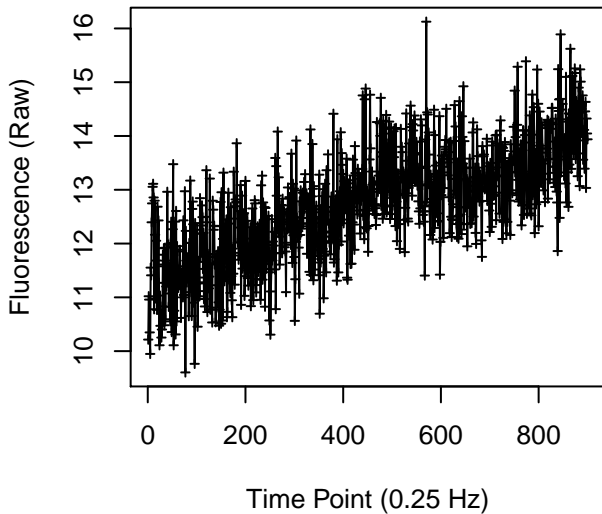

**Cell 256**

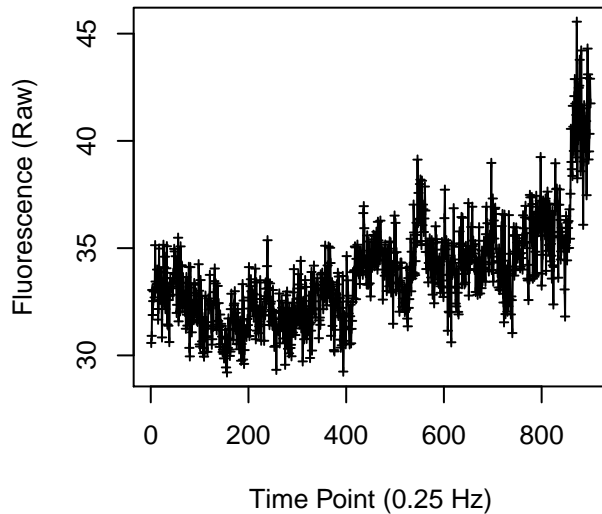

**Cell 257**

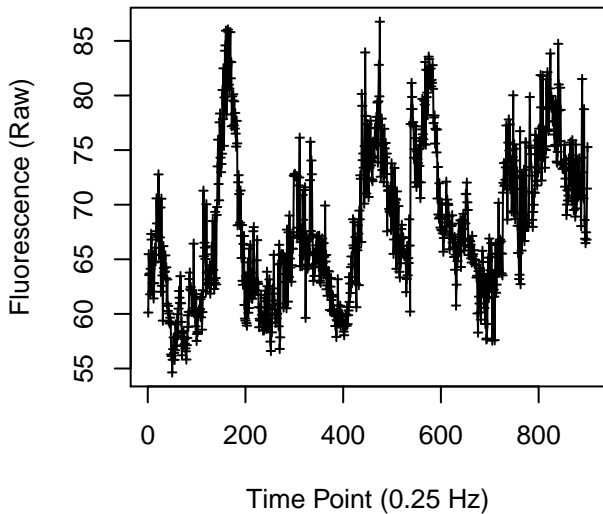

**Cell 258**

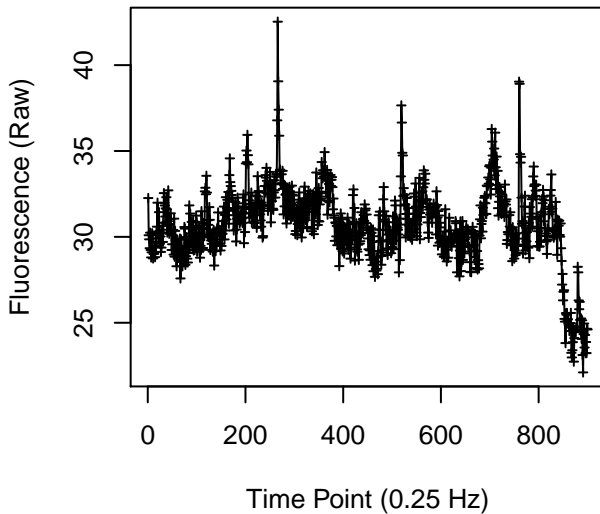

**Cell 259**

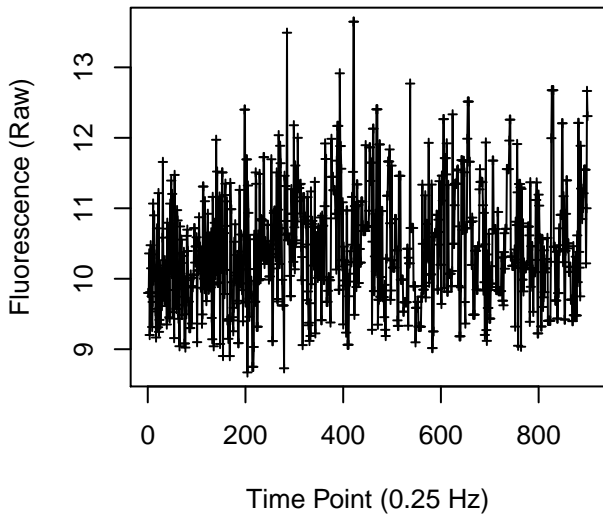

**Cell 260**

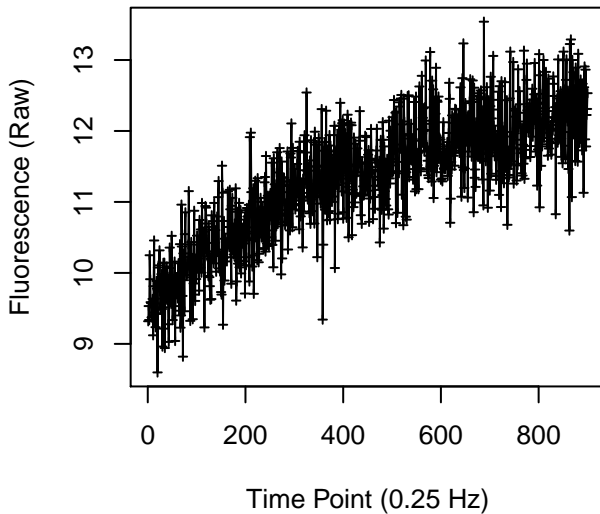

**Cell 261**

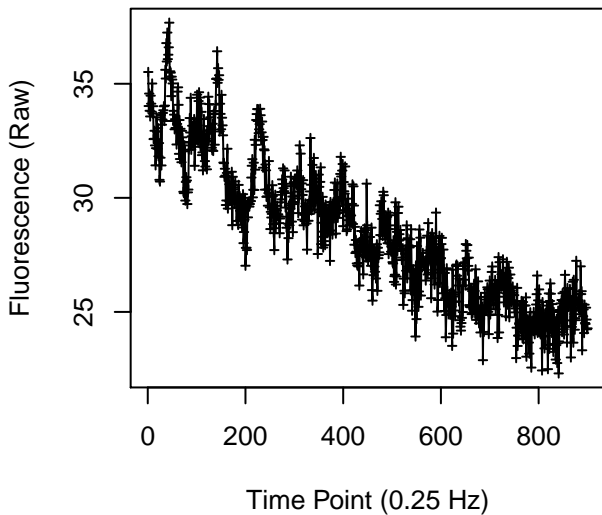

**Cell 262**

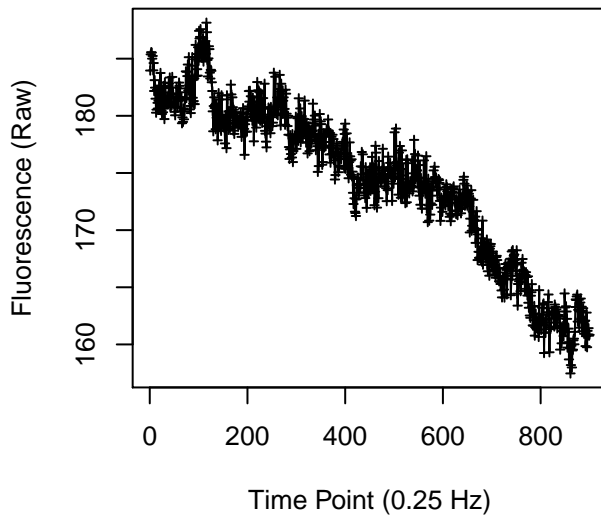

**Cell 263**

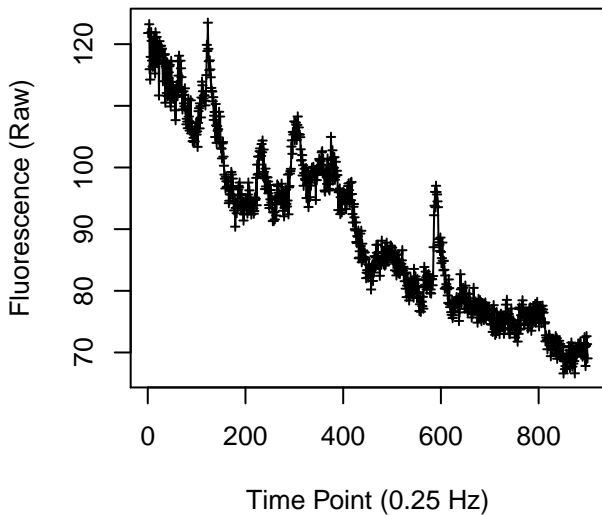

**Cell 264**

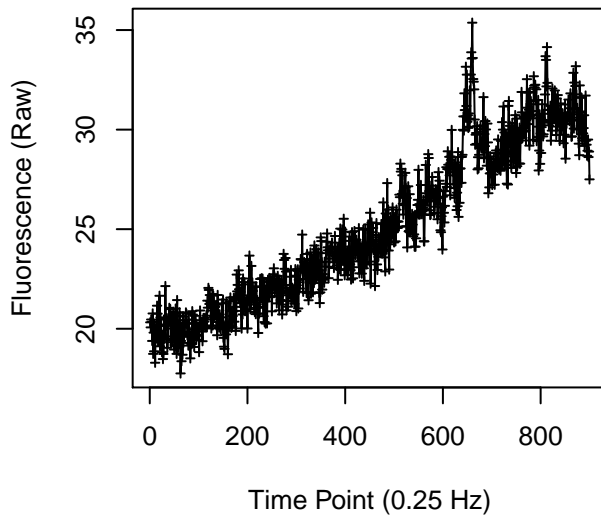



**Cell 265**

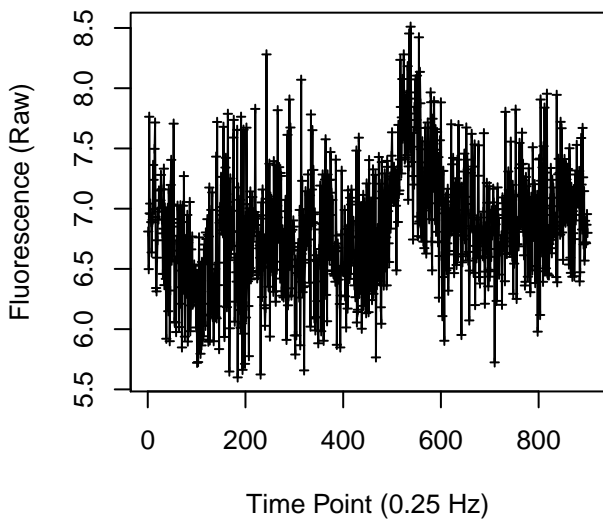

**Cell 266**

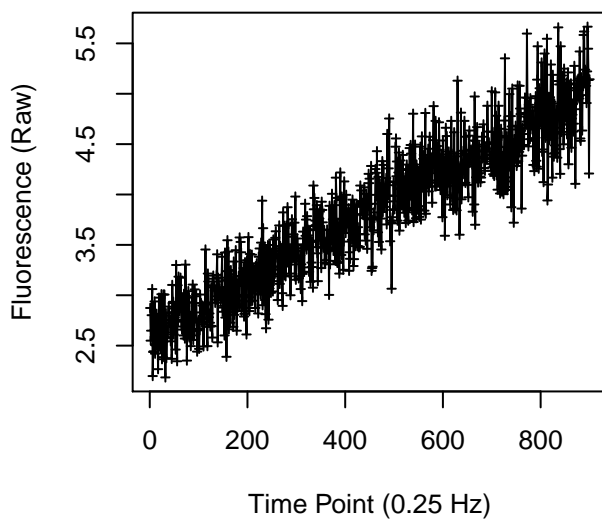

**Cell 267**

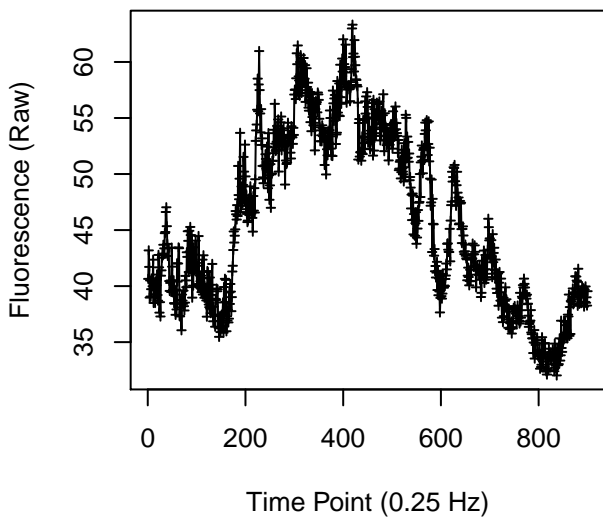

**Cell 268**

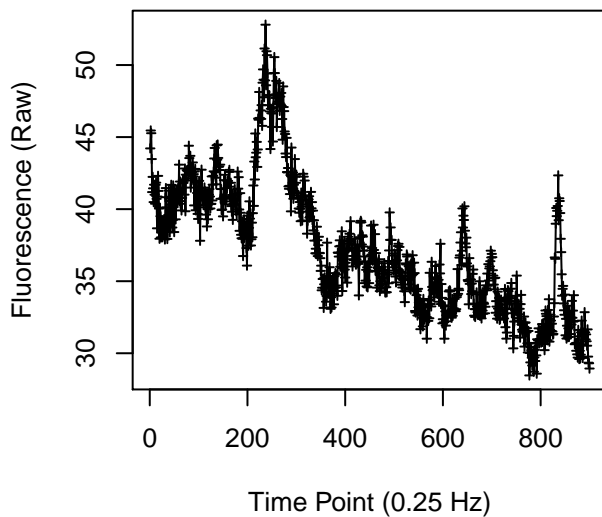

**Cell 269**

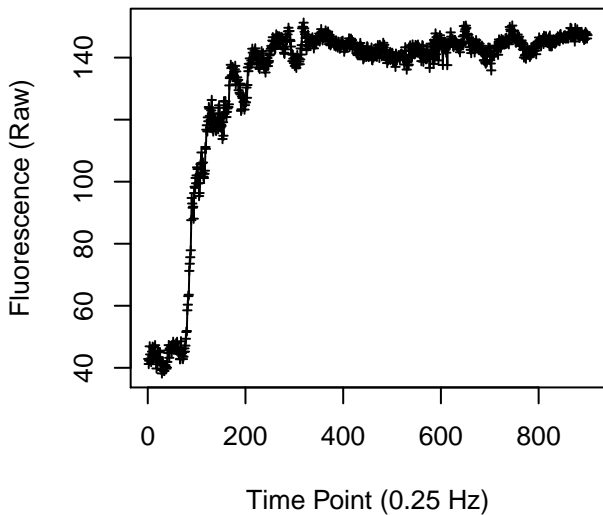

**Cell 270**

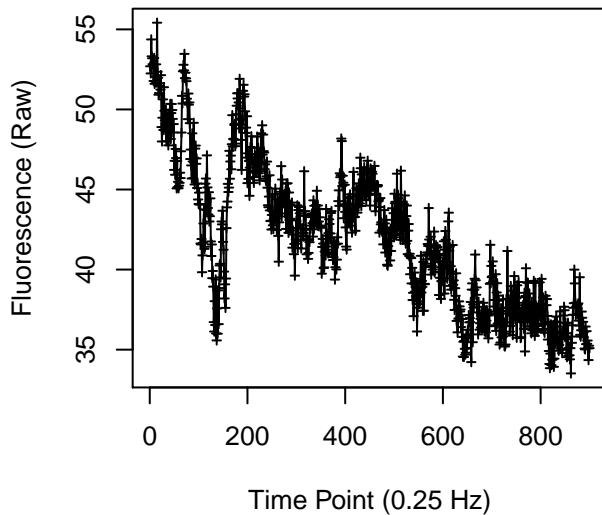

**Cell 271**

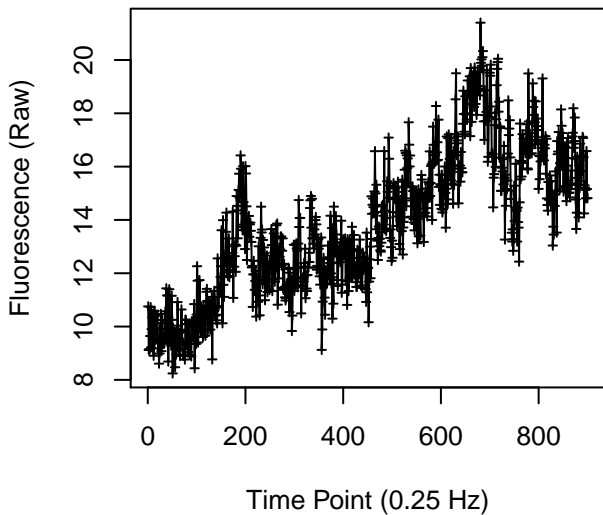

**Cell 272**

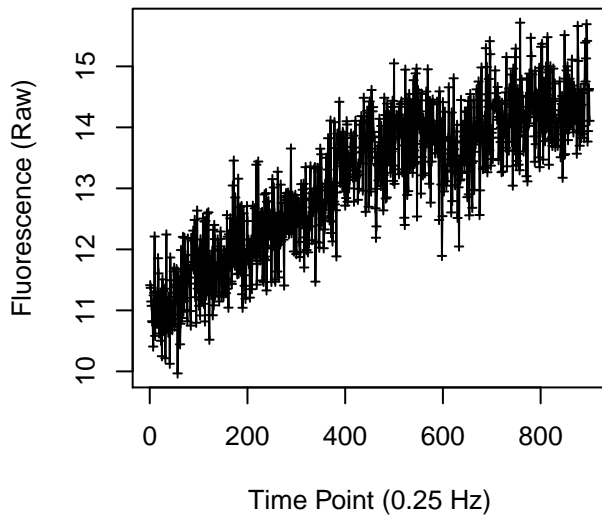

**Cell 273**

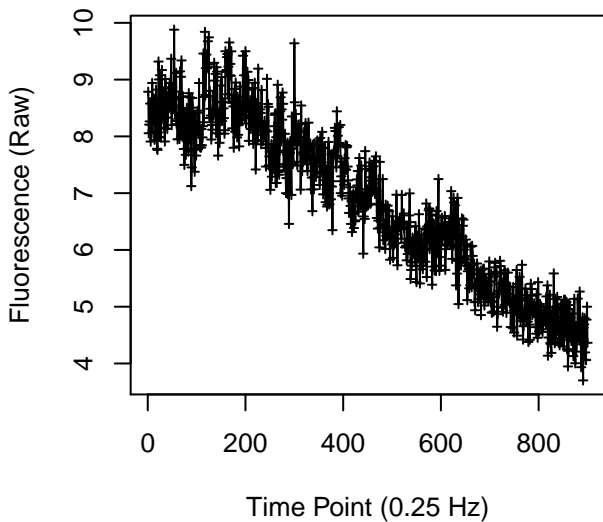

**Cell 274**

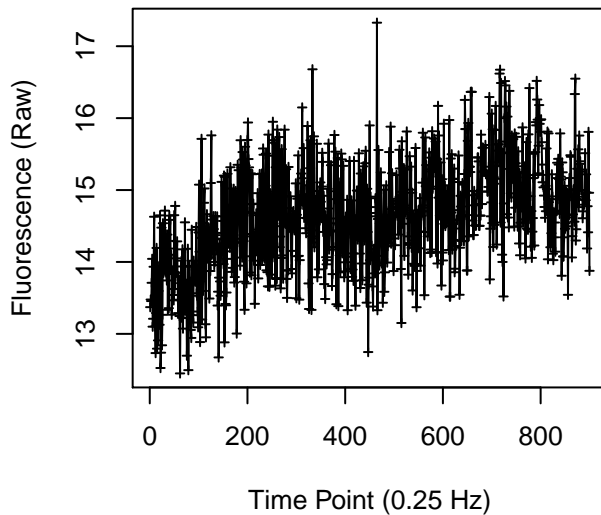

**Cell 275**

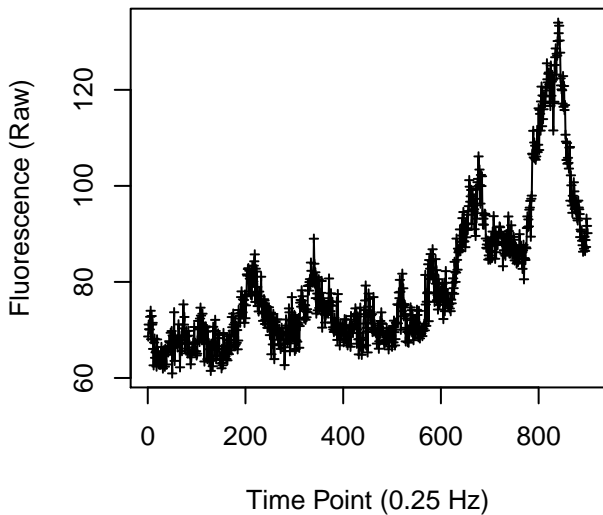

**Cell 276**

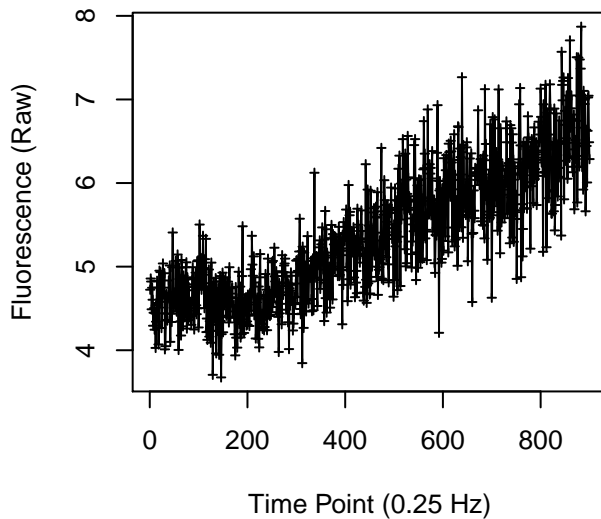

**Cell 277**

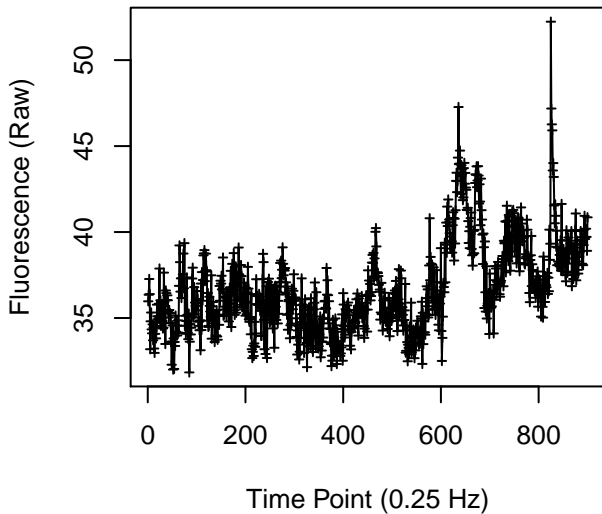

**Cell 278**

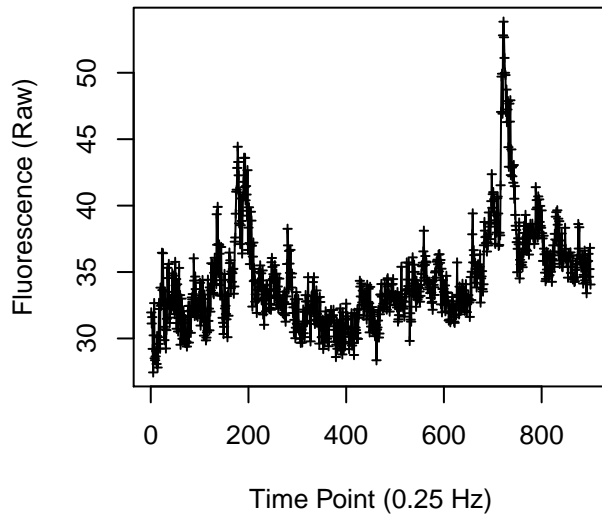

**Cell 279**

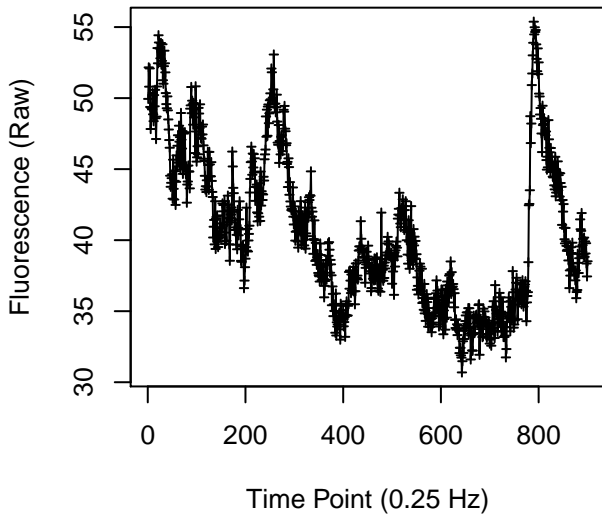

**Cell 280**

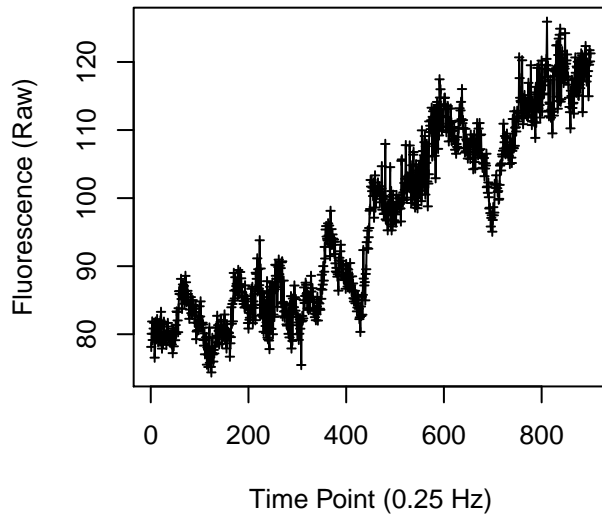

**Cell 281**

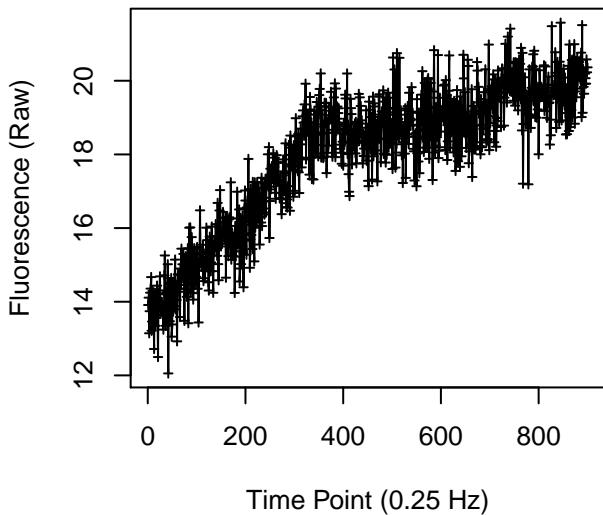

**Cell 282**

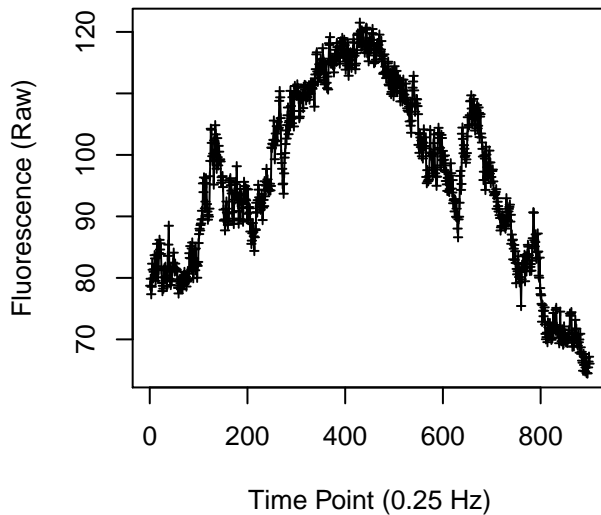

**Cell 283**

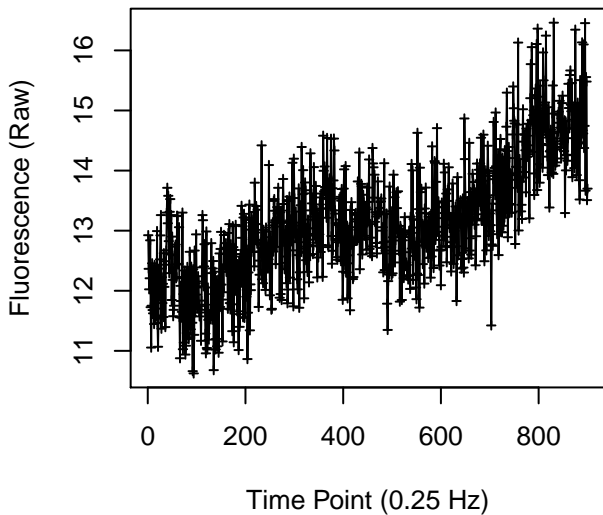

**Cell 284**

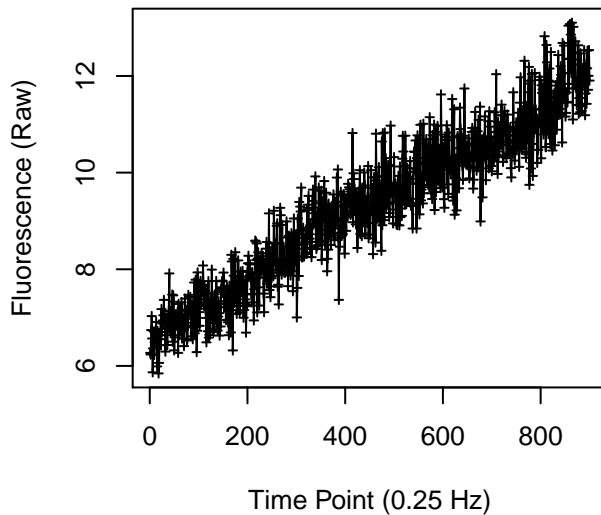

**Cell 285**

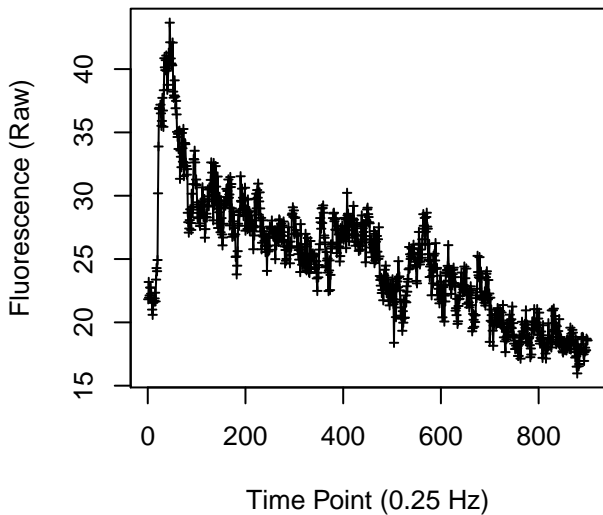

**Cell 286**

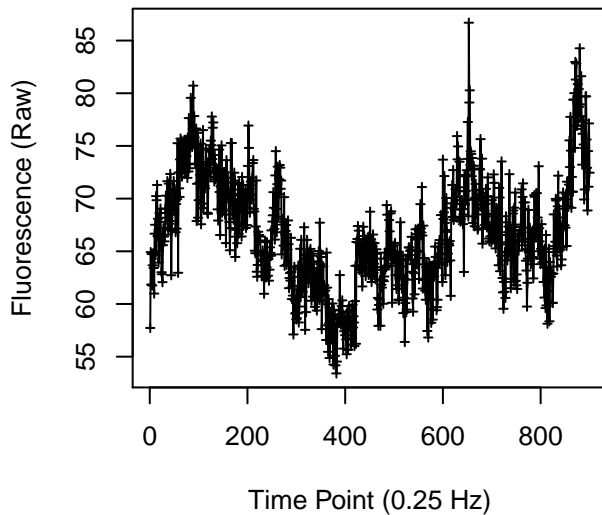

**Cell 287**

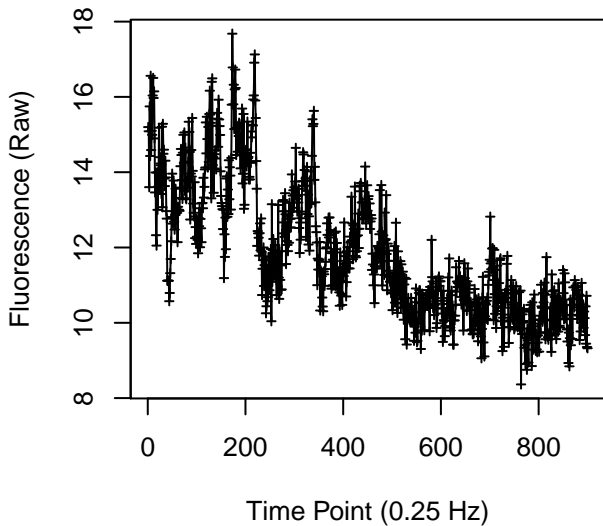

**Cell 288**

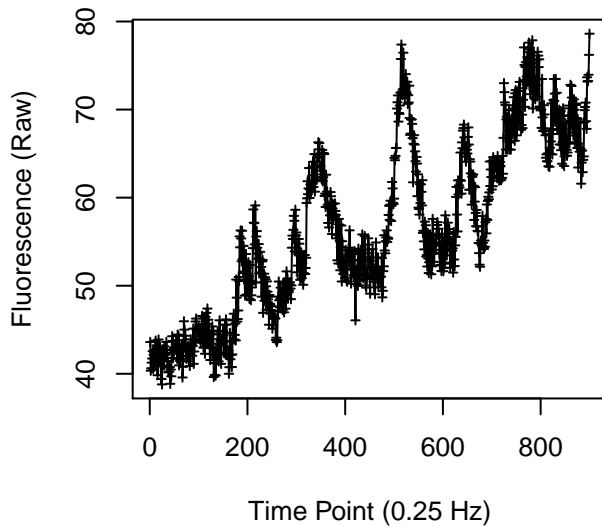

**Cell 289**

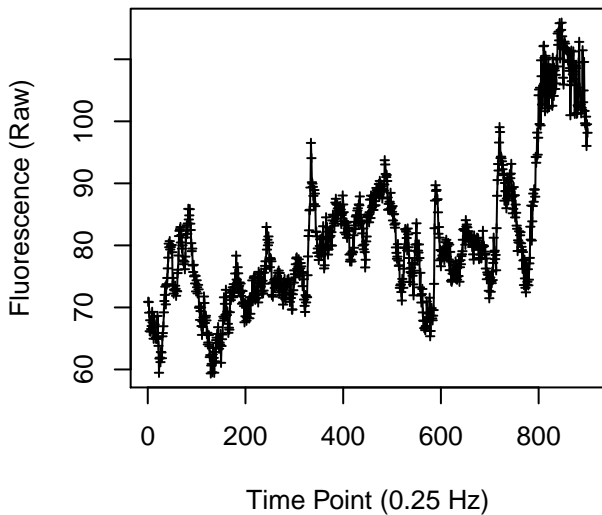

**Cell 290**

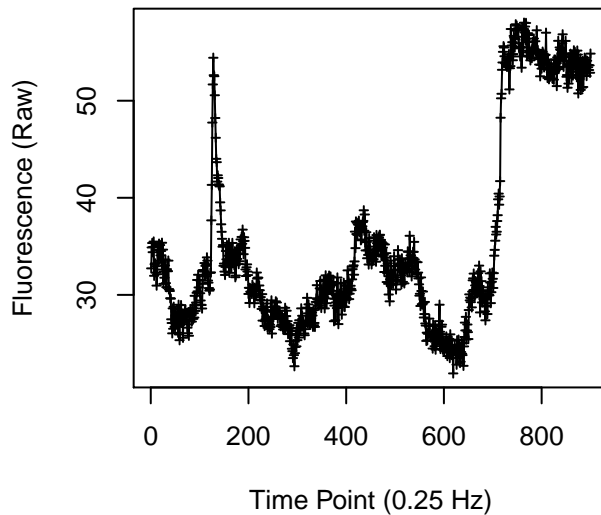

**Cell 291**

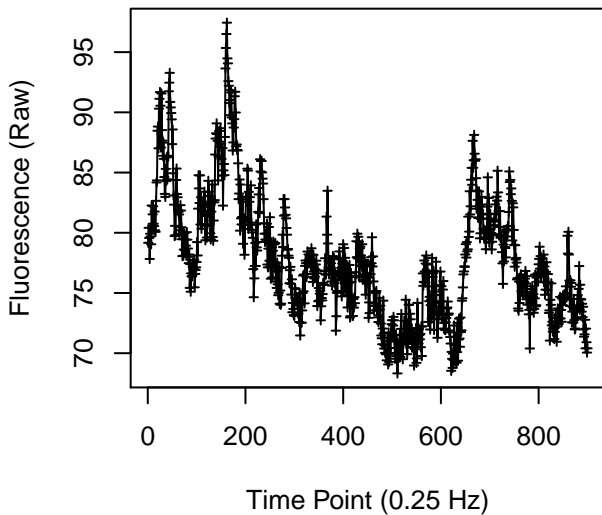

**Cell 292**

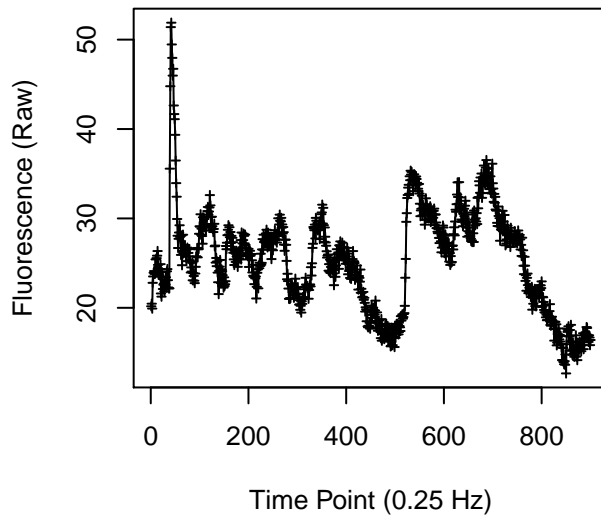

**Cell 293**

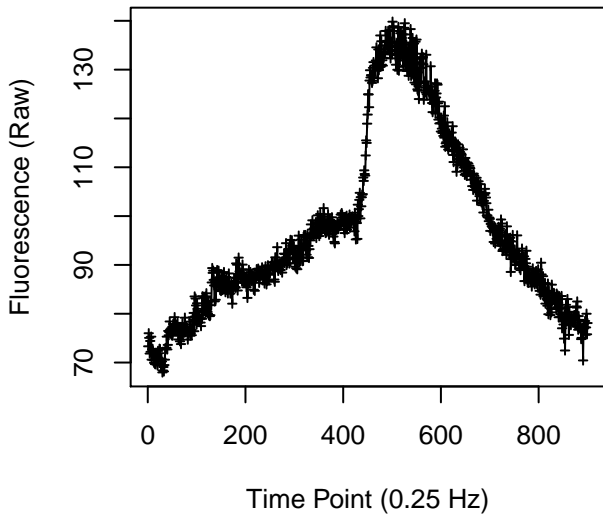

**Cell 294**

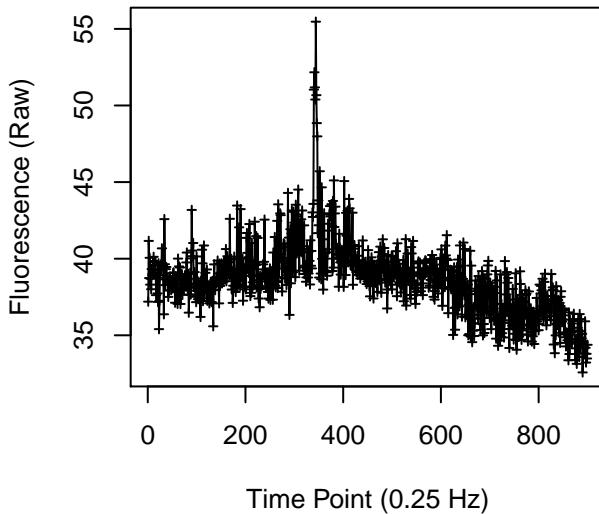

**Cell 295**

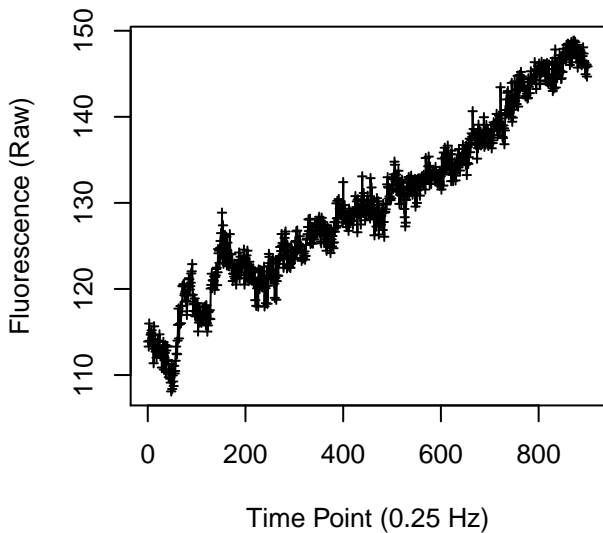

**Cell 296**

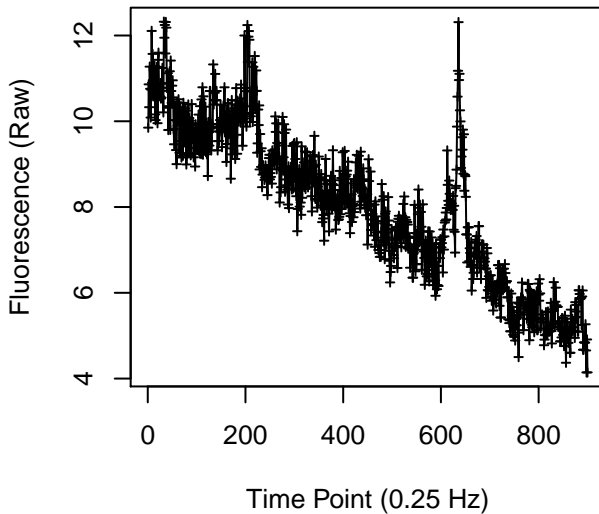



**Cell 297**

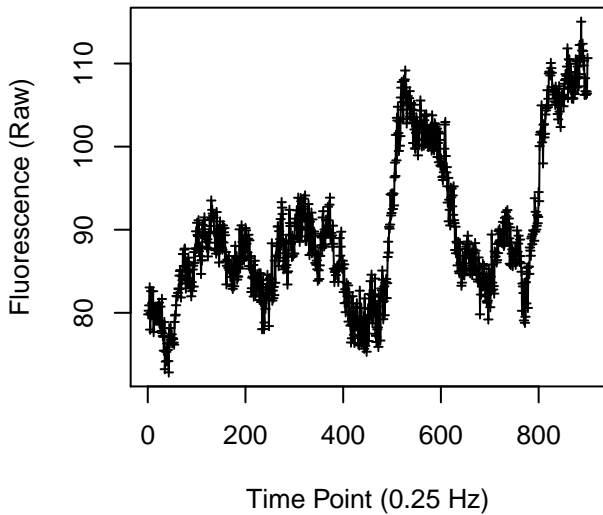

**Cell 298**

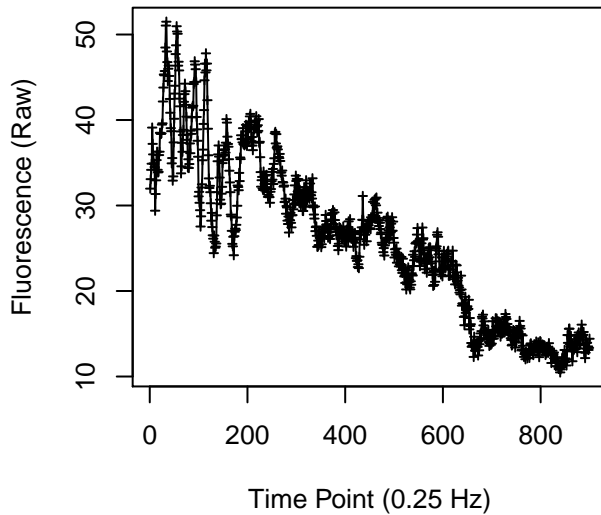

**Cell 299**

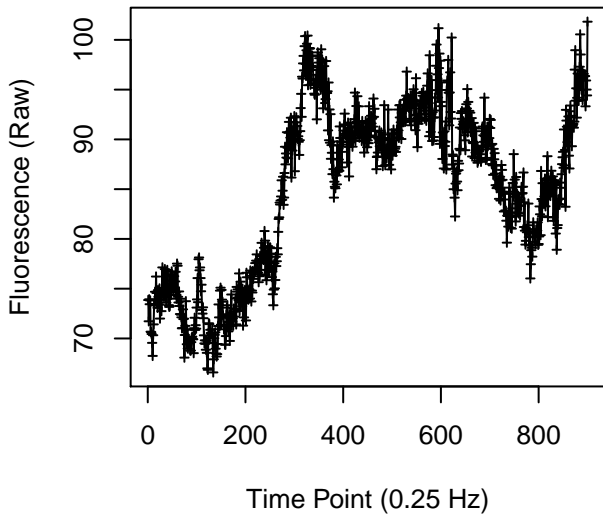

**Cell 300**

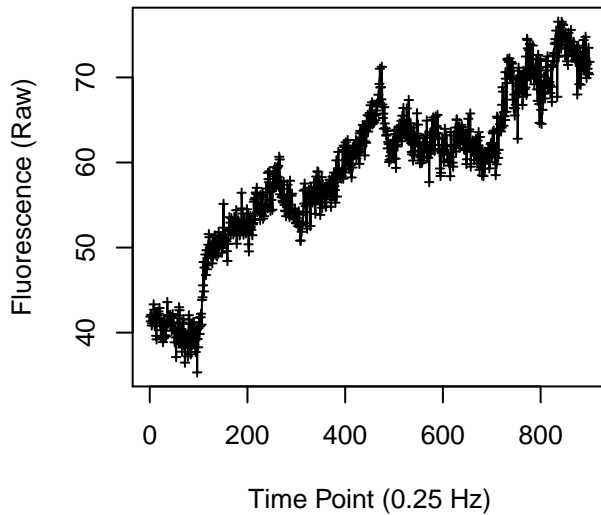

**Cell 301**

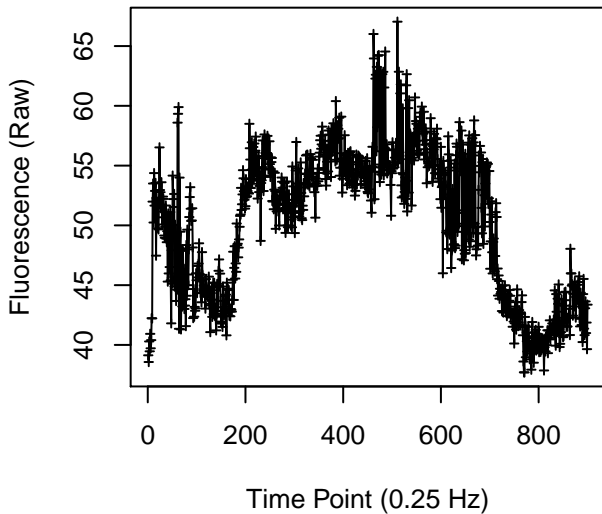

**Cell 302**

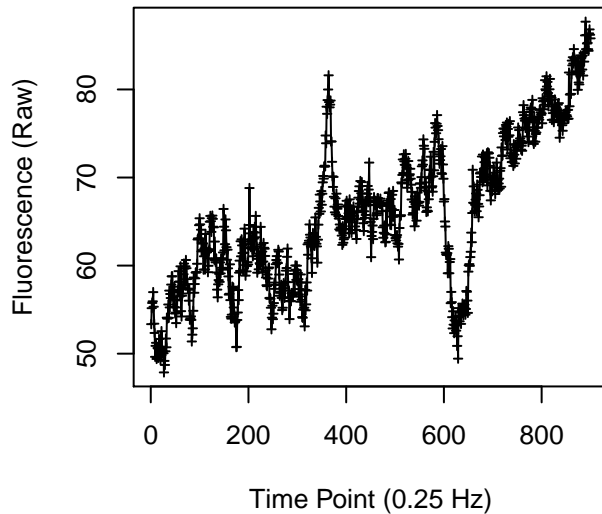

**Cell 303**

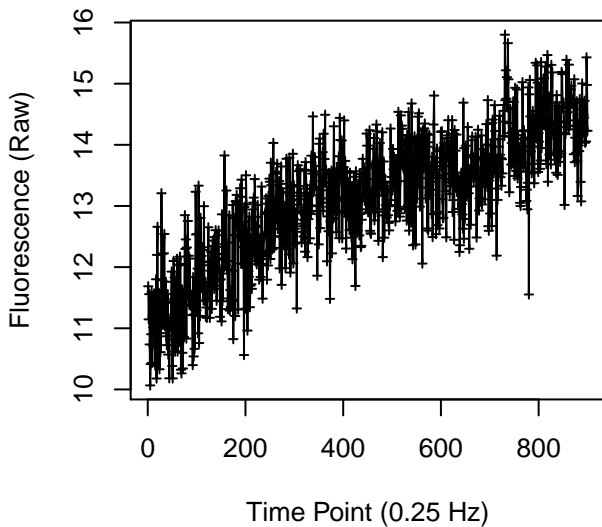

**Cell 304**

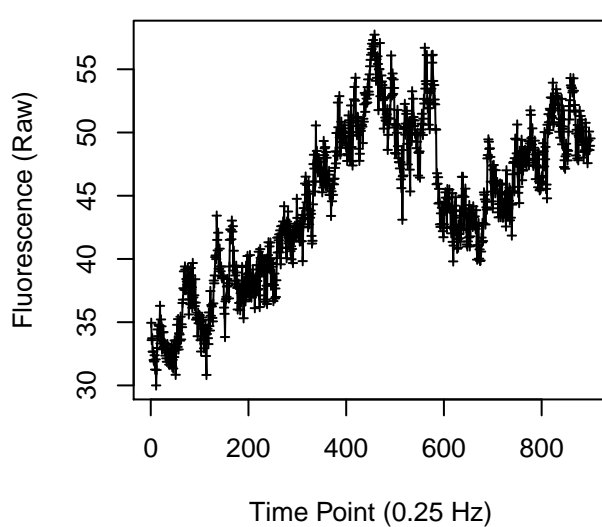

**Cell 305**

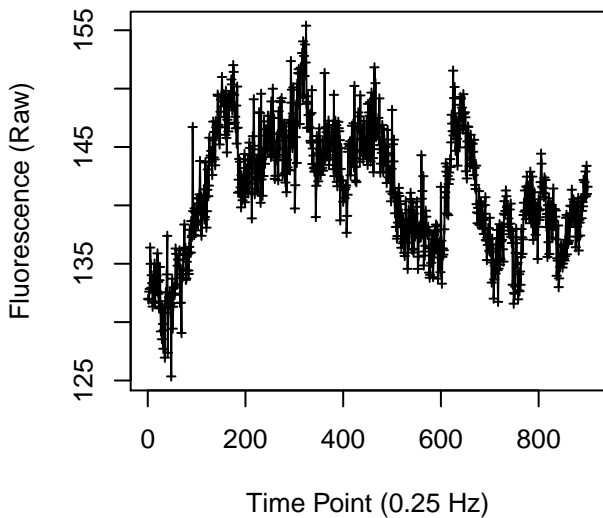

**Cell 306**

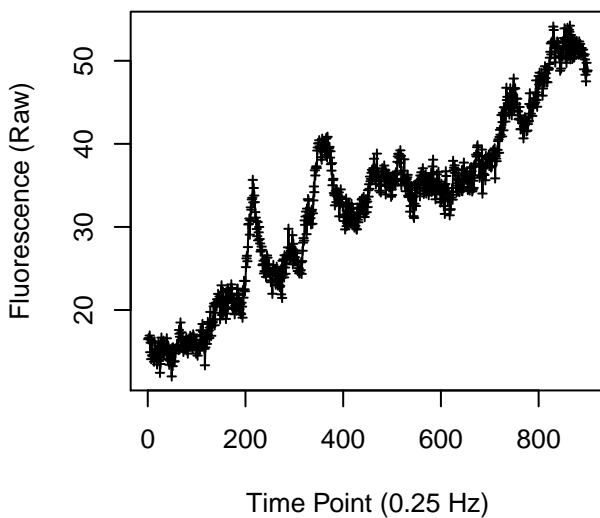

**Cell 307**

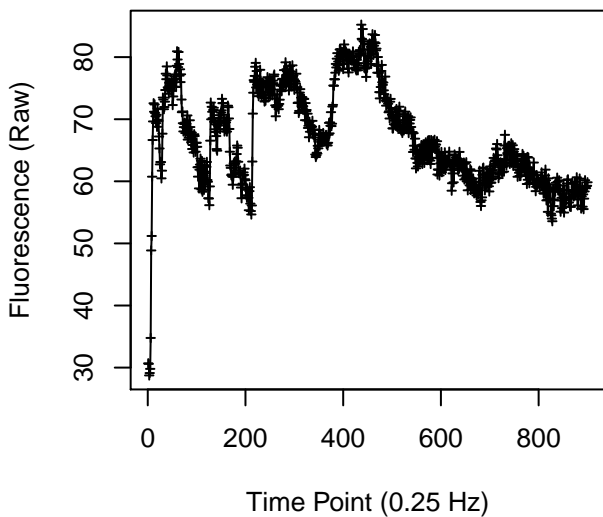

**Cell 308**

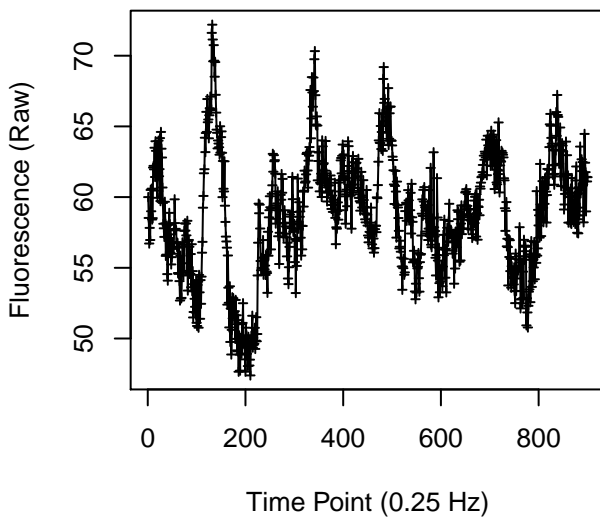

**Cell 309**

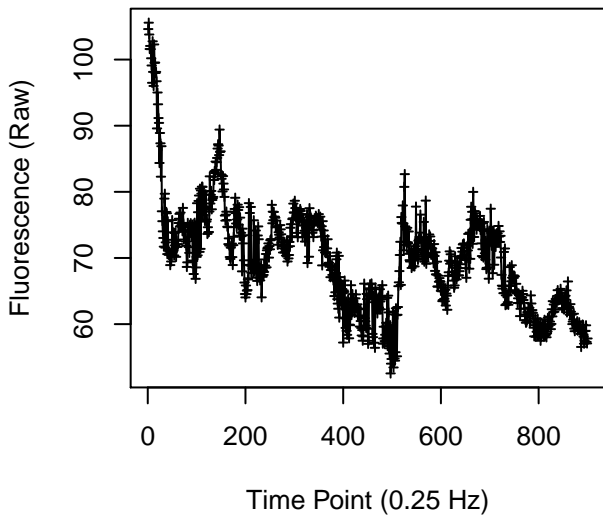

**Cell 310**

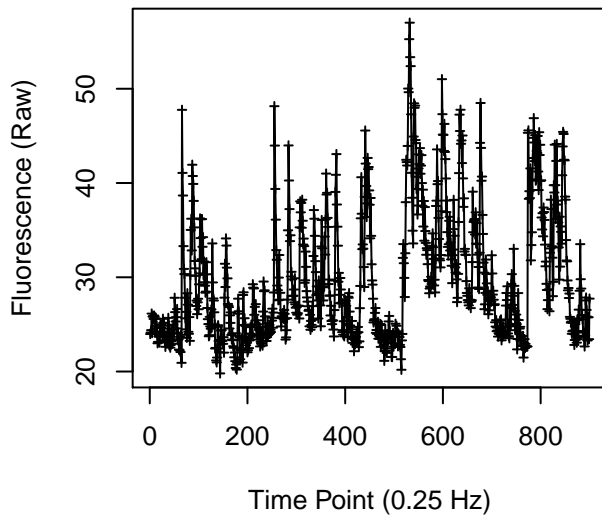

**Cell 311**

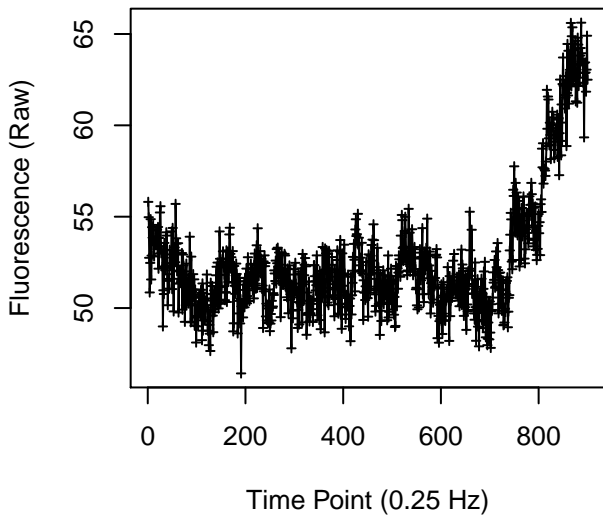

**Cell 312**

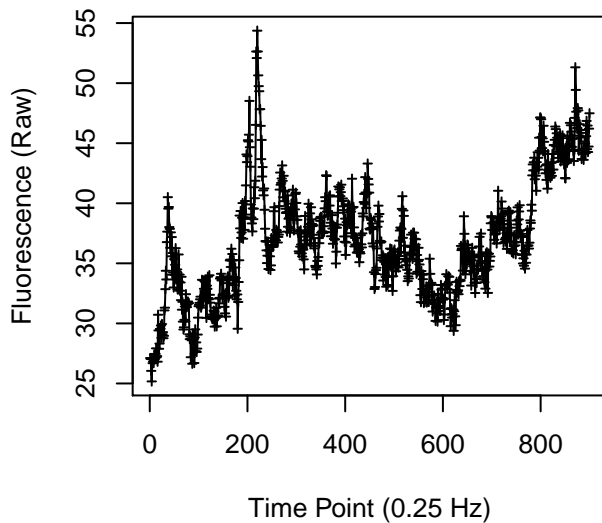

**Cell 313**

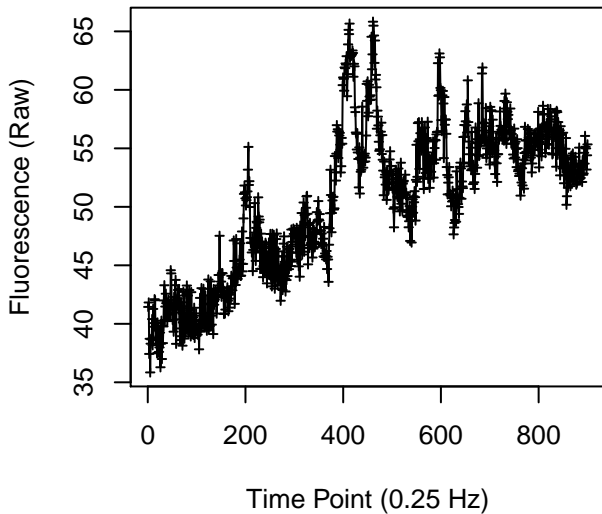

**Cell 314**

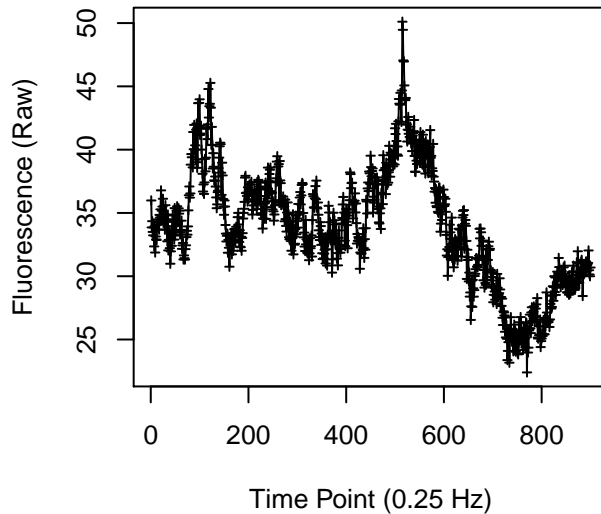

**Cell 315**

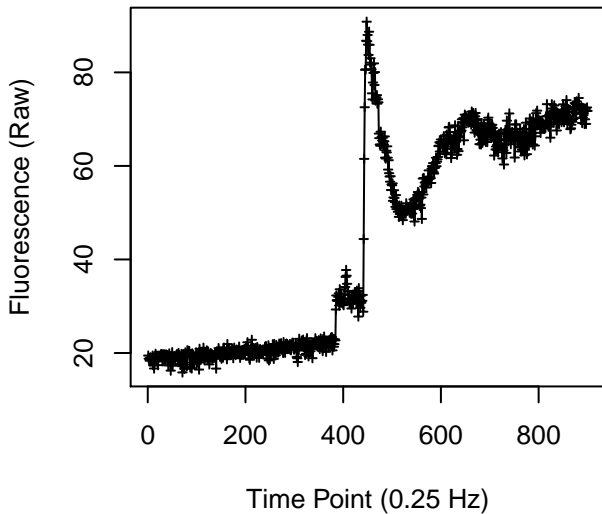

**Cell 316**

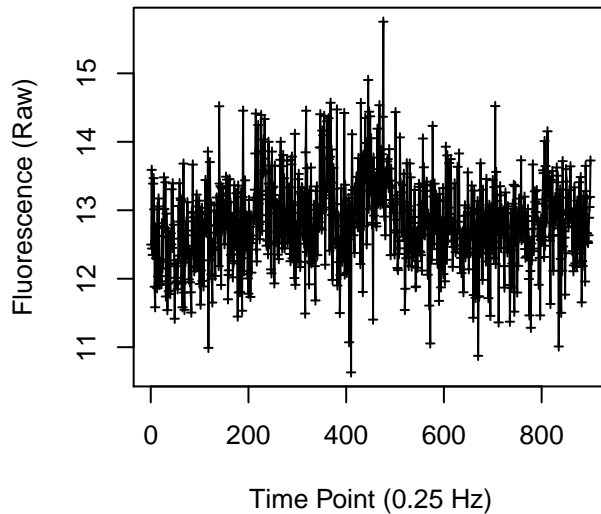

**Cell 317**

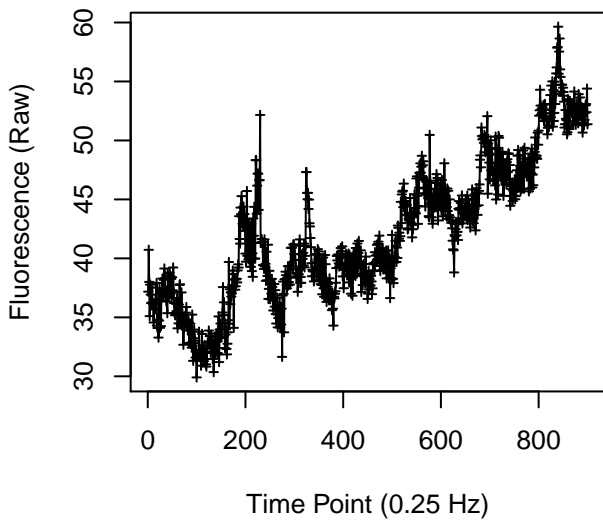

**Cell 318**

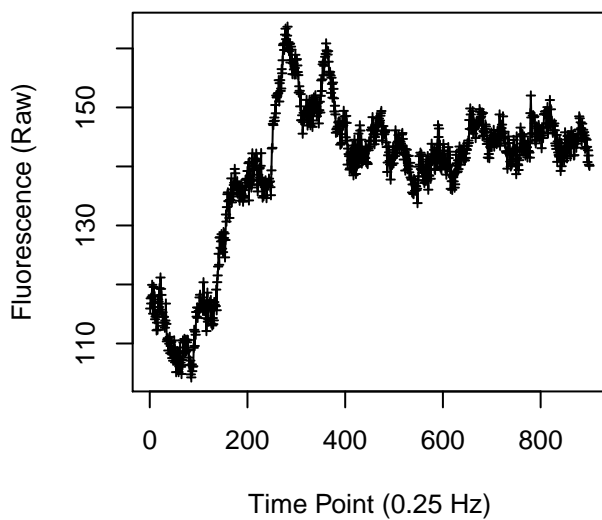

**Cell 319**

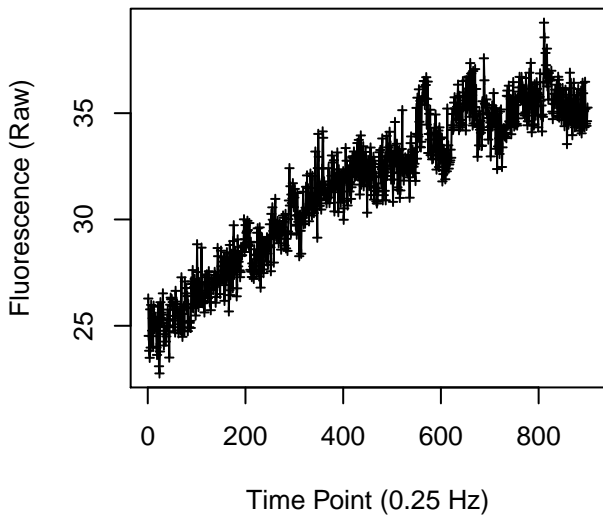

**Cell 320**

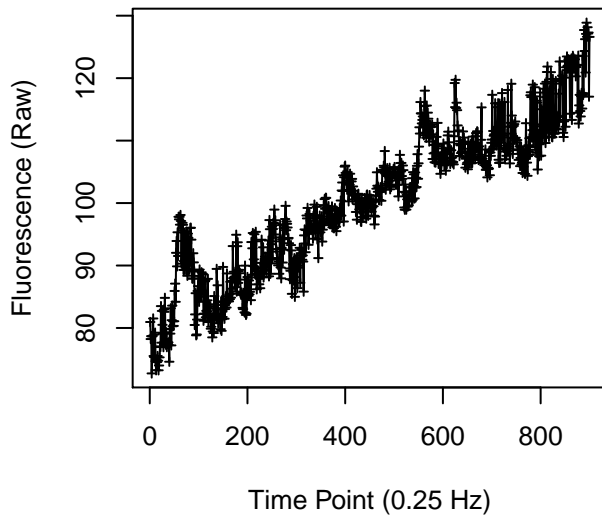

**Cell 321**

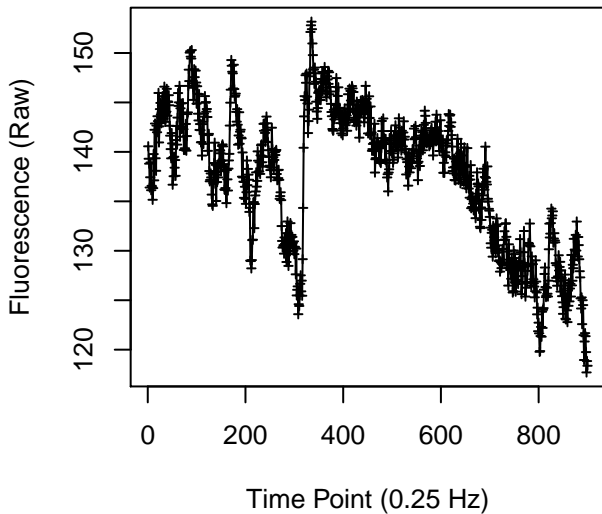

**Cell 322**

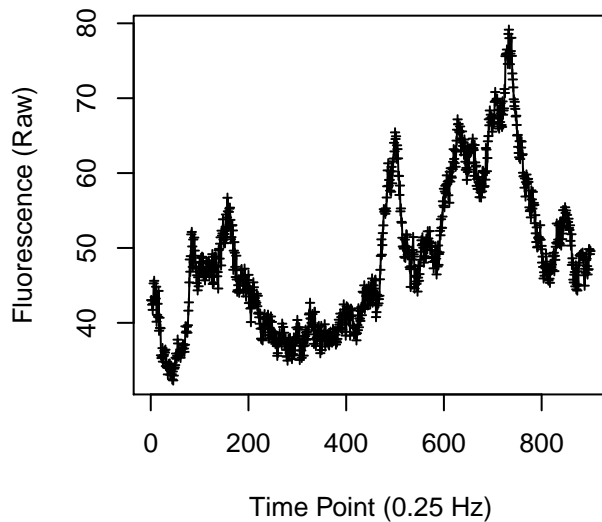

**Cell 323**

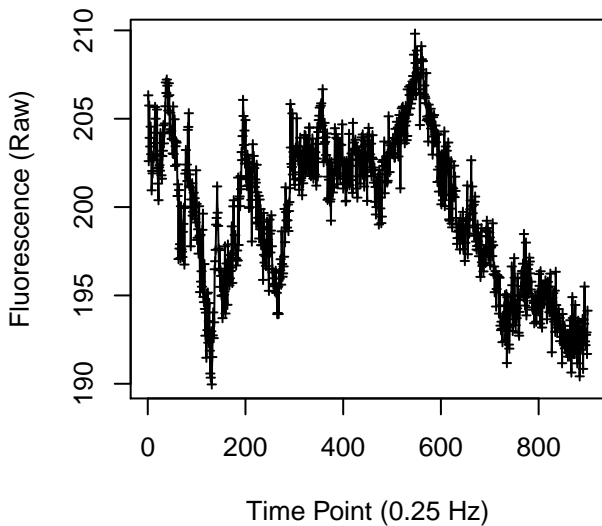

**Cell 324**

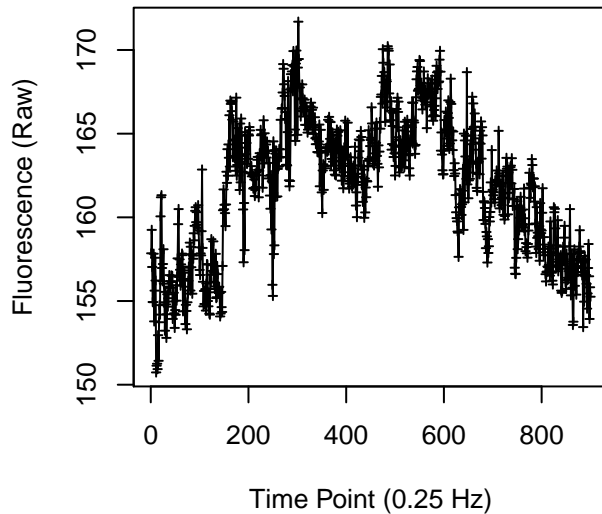

**Cell 325**

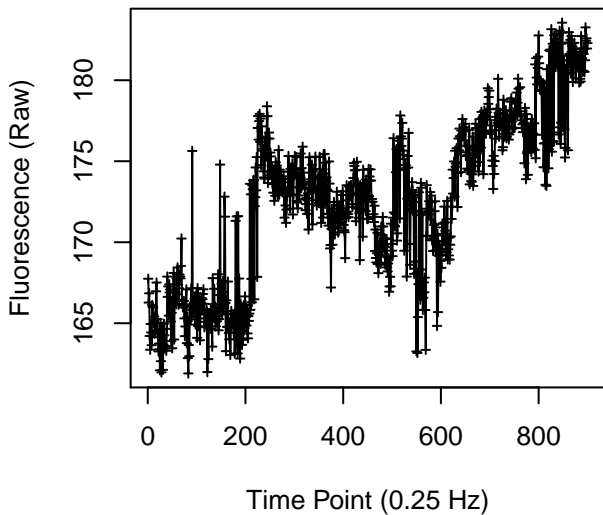

**Cell 326**

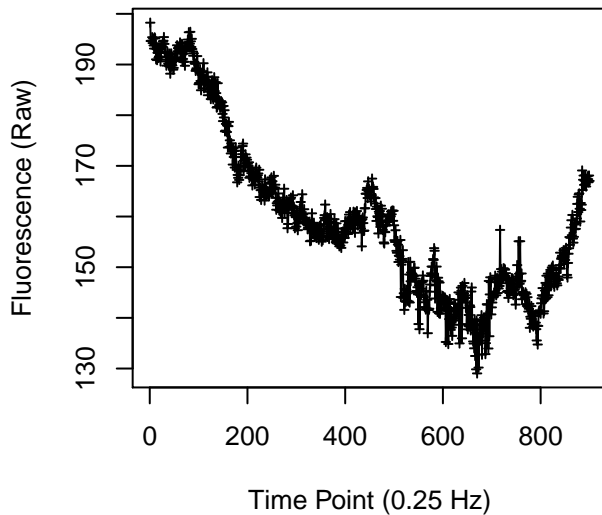

**Cell 327**

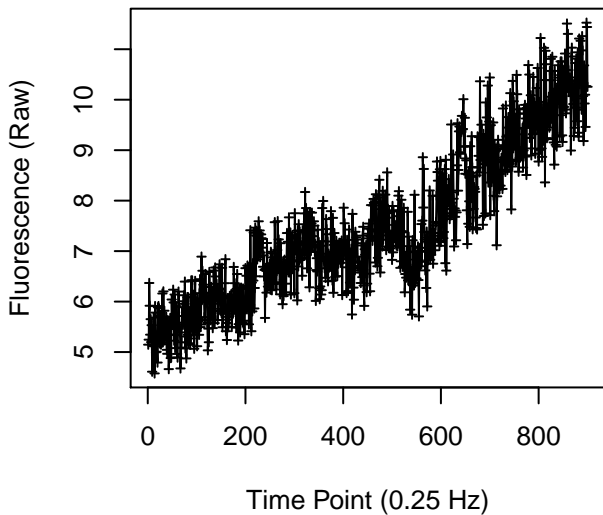

**Cell 328**

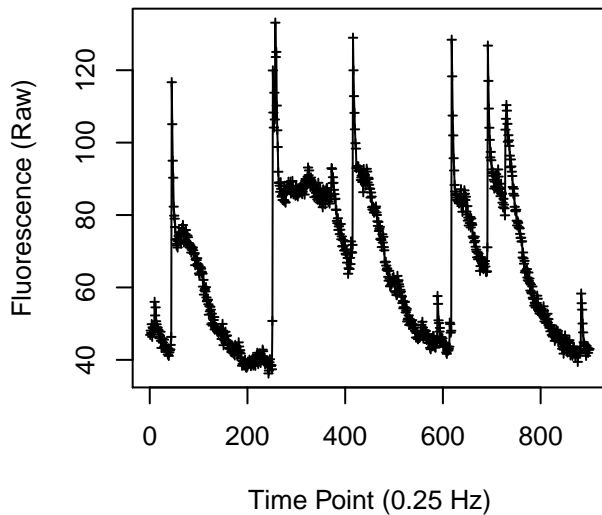



**Cell 329**

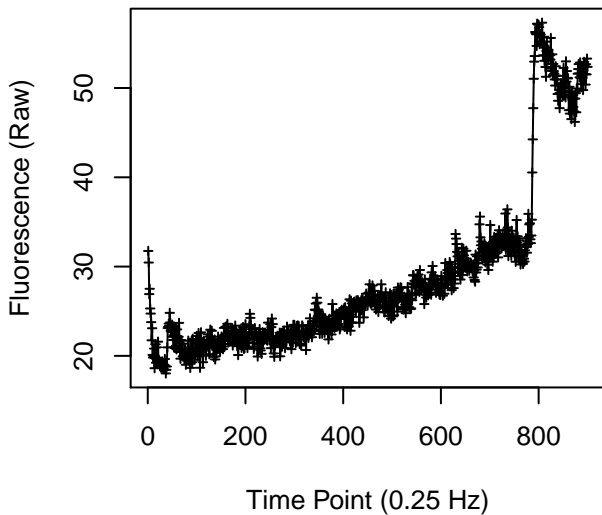

**Cell 330**

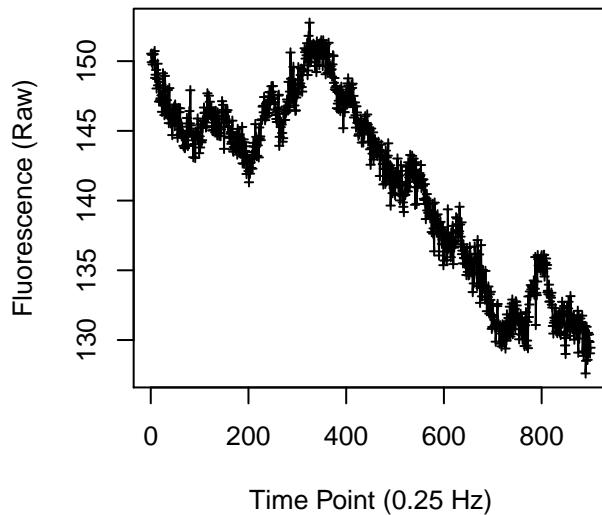

**Cell 331**

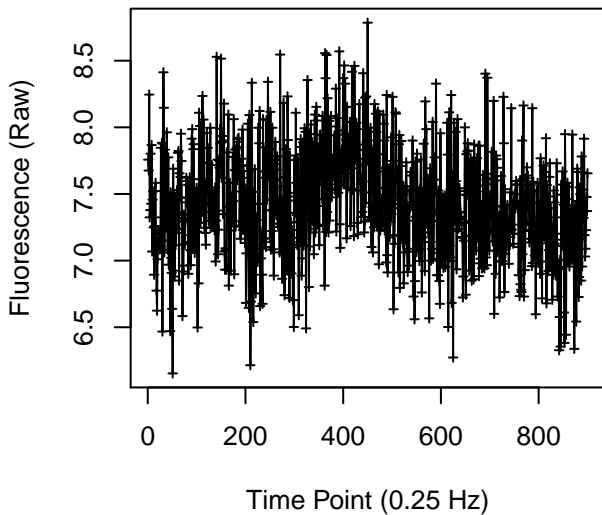

**Cell 332**

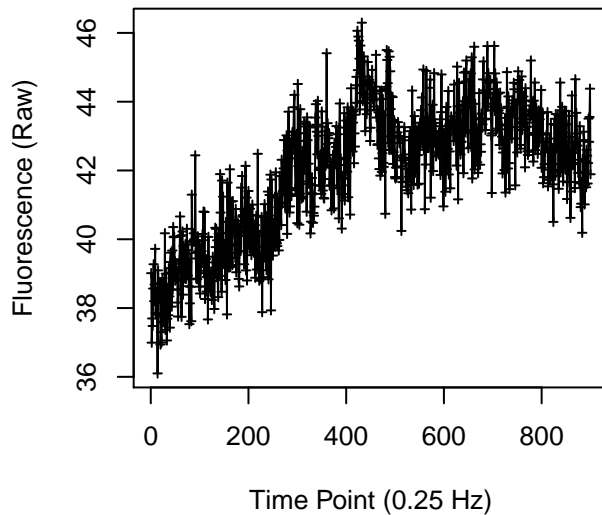

**Cell 333**

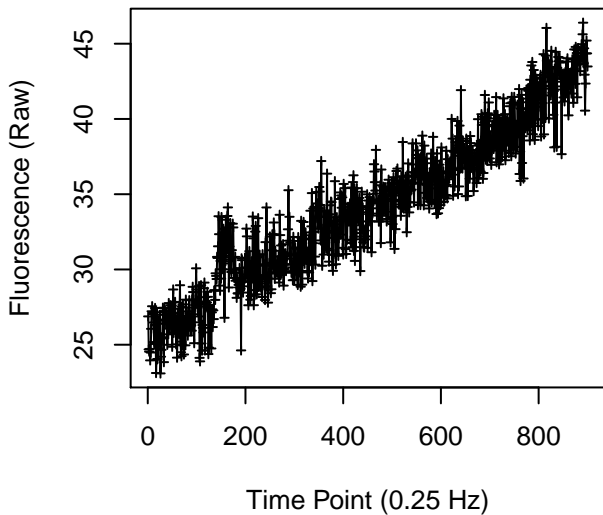

**Cell 334**

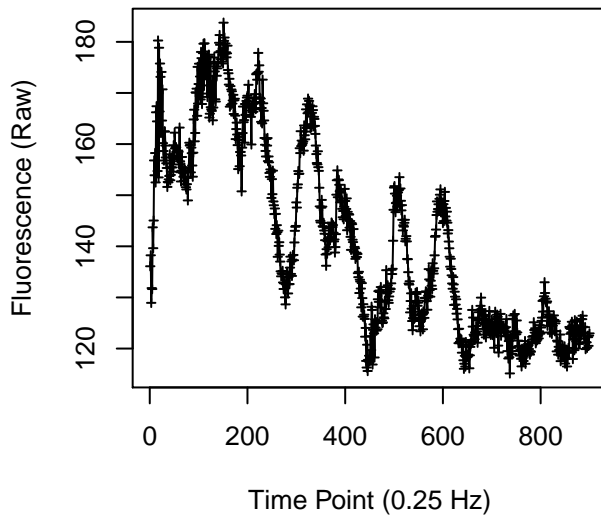

**Cell 335**

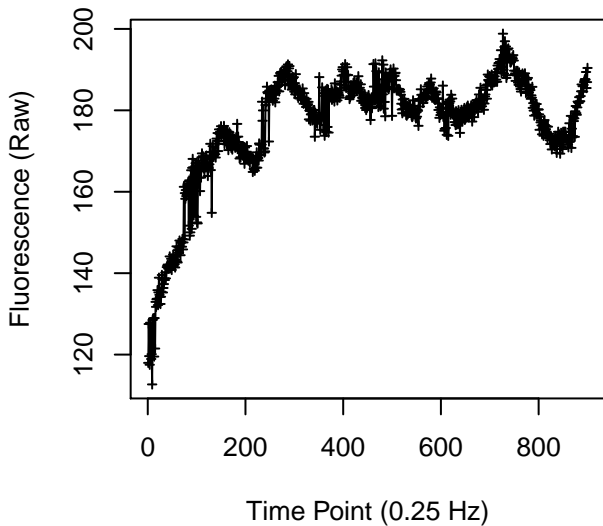

**Cell 336**

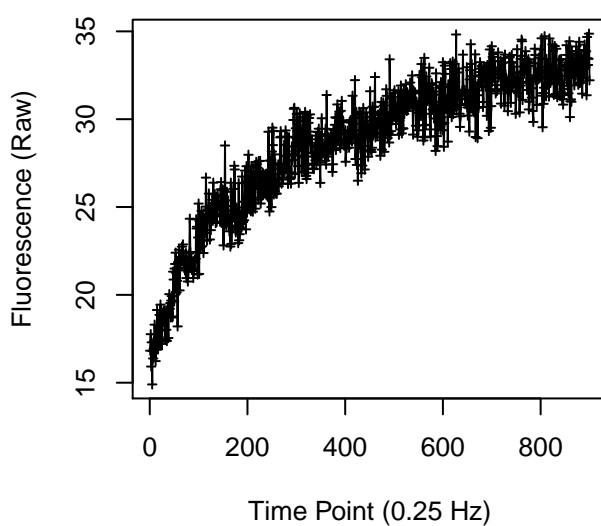

**Cell 337**

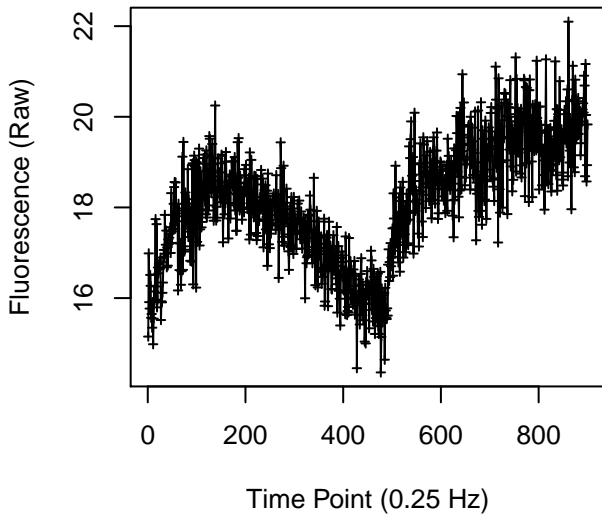

**Cell 338**

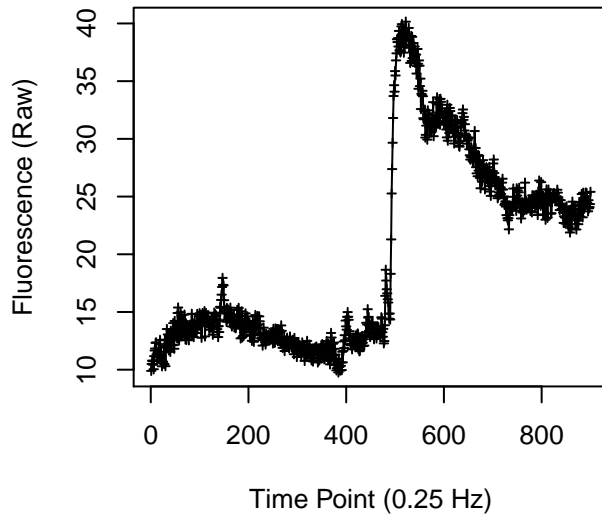

**Cell 339**

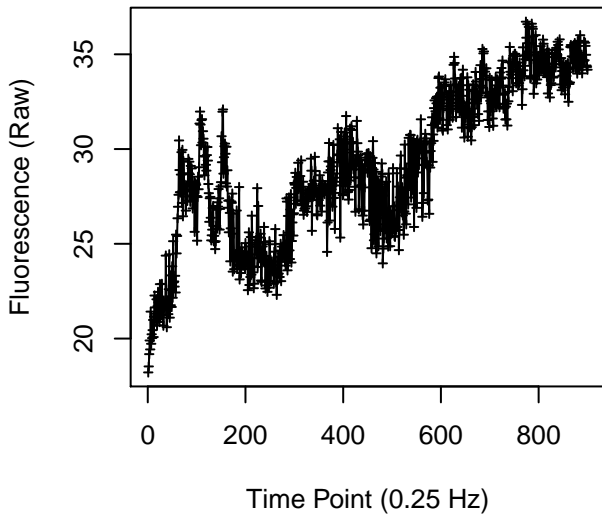

**Cell 340**

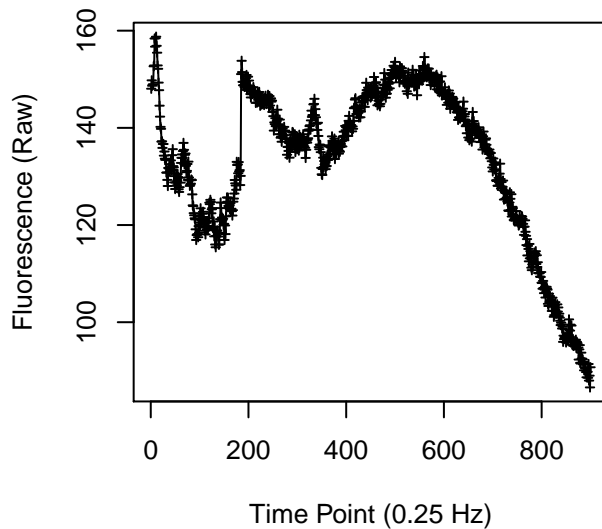

**Cell 341**

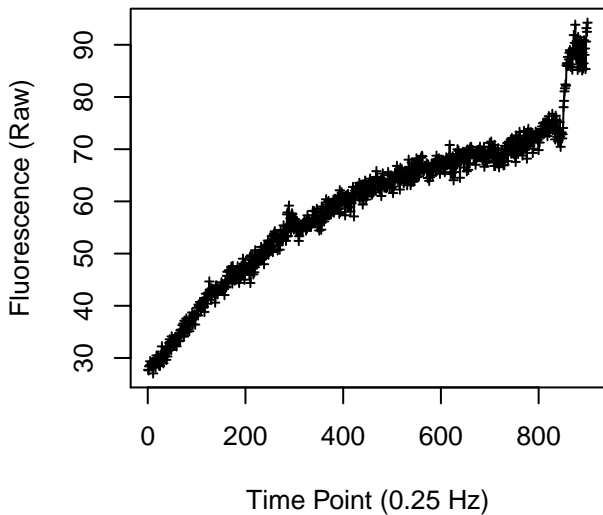

**Cell 342**

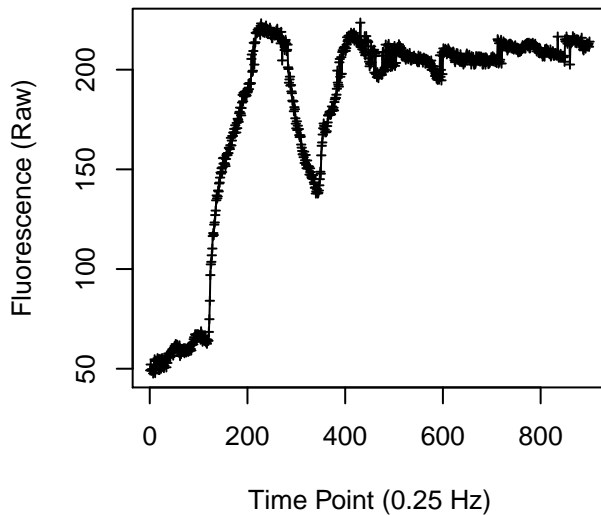

**Cell 343**

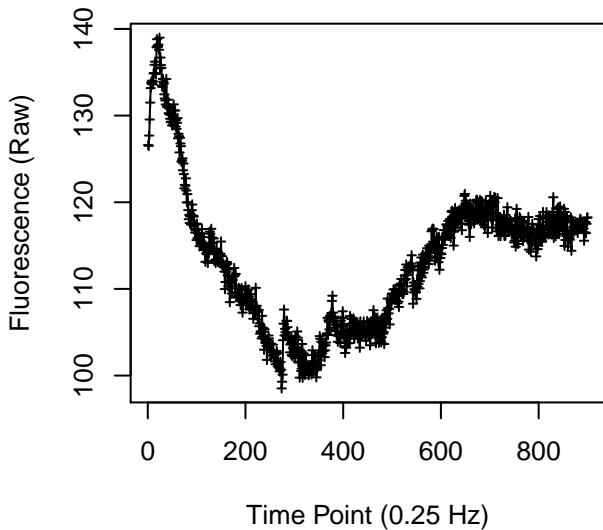

**Cell 344**

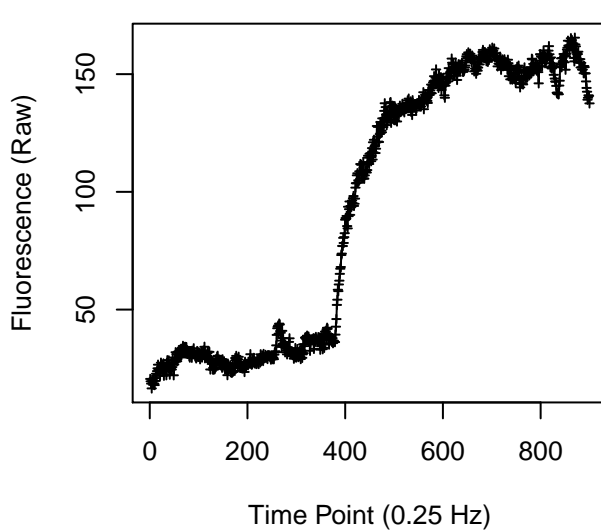

**Cell 345**

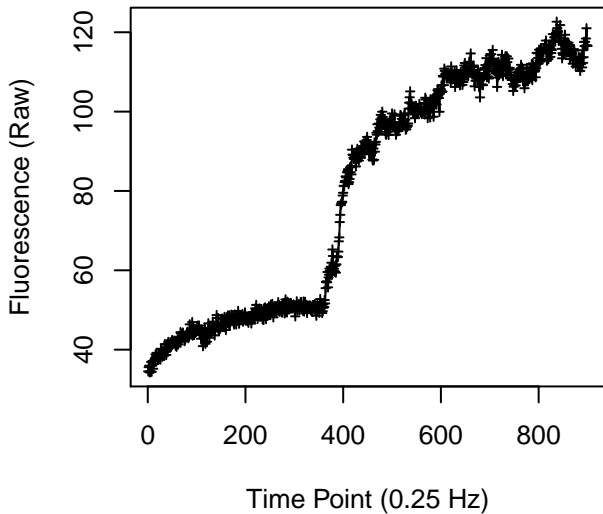

**Cell 346**

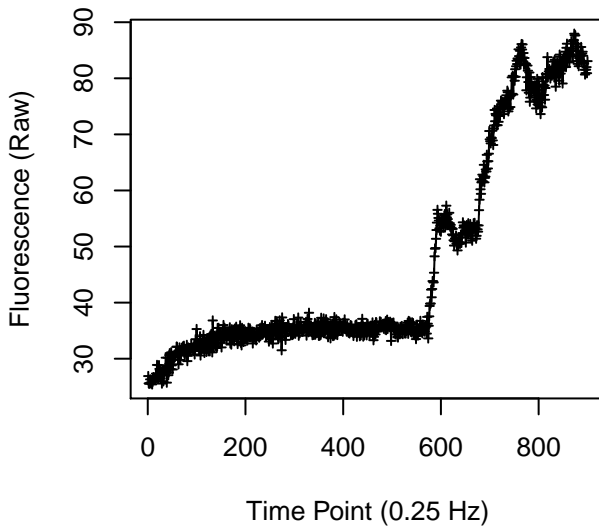

**Cell 347**

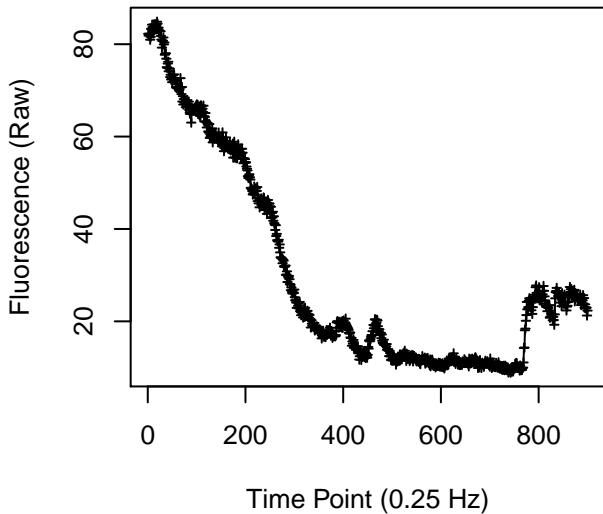

**Cell 348**

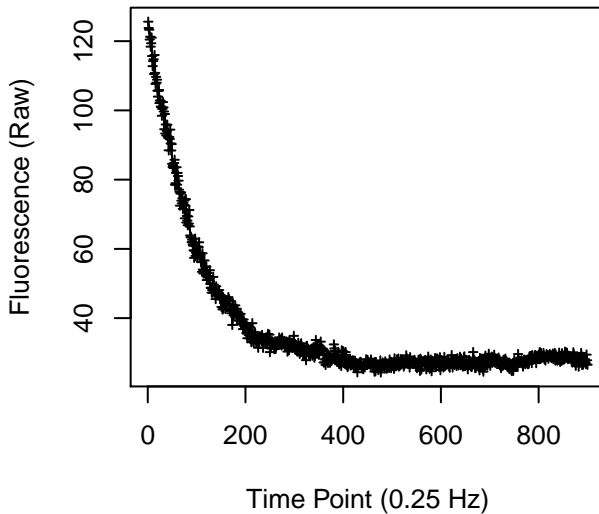

**Cell 349**

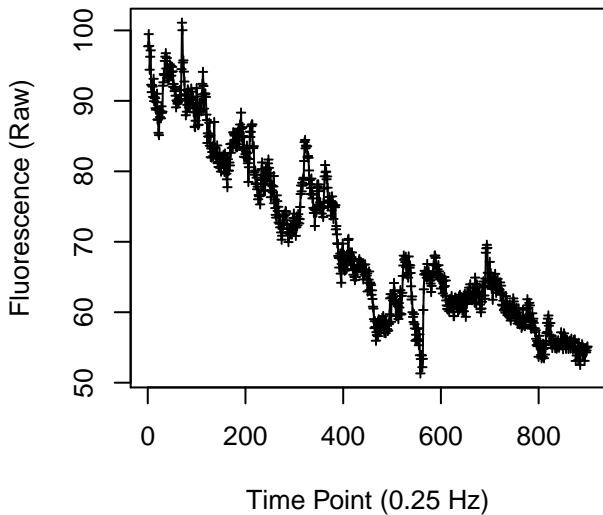

**Cell 350**

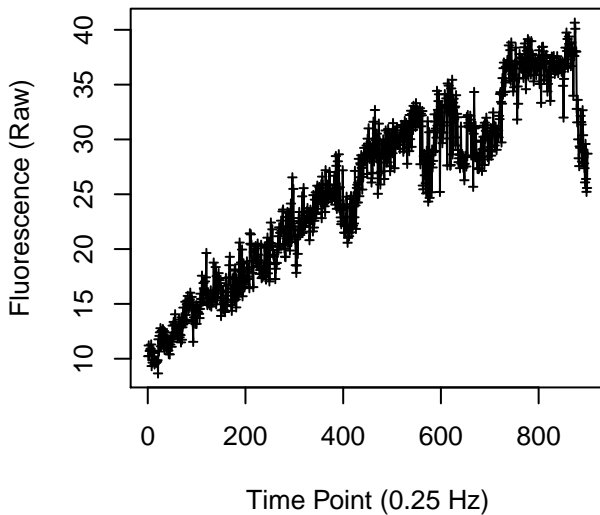

**Cell 351**

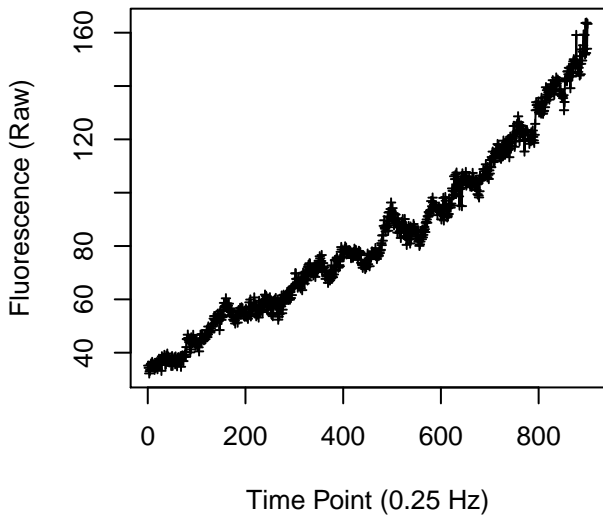

**Cell 352**

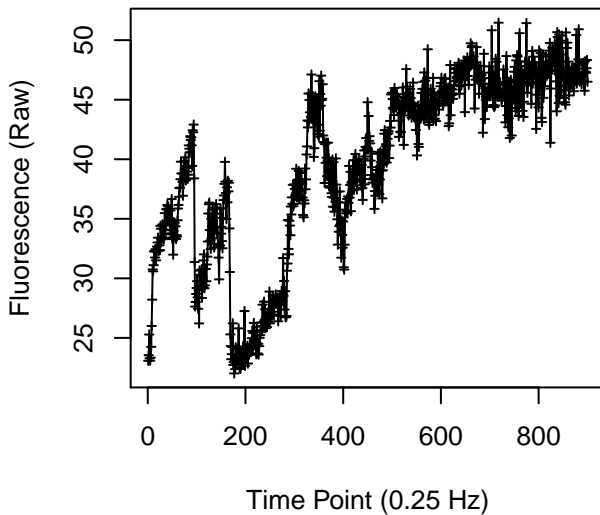

**Cell 353**

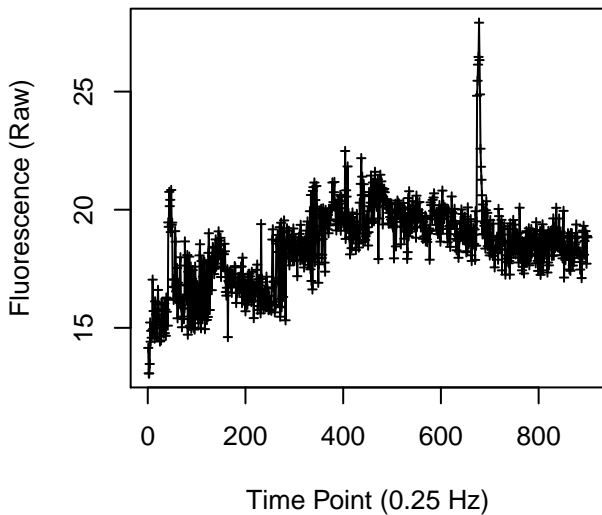

**Cell 354**

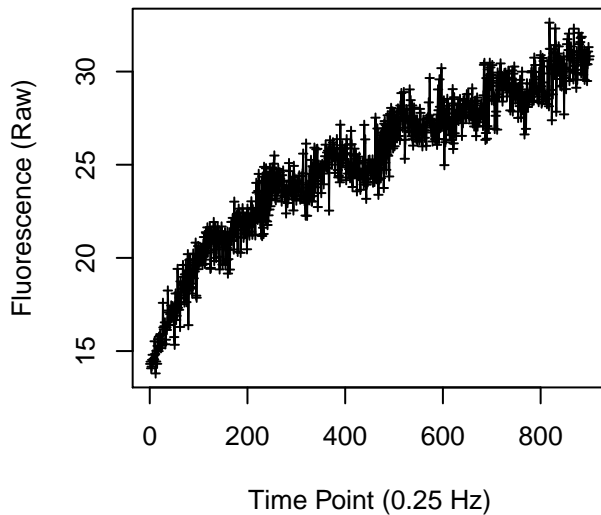

**Cell 355**

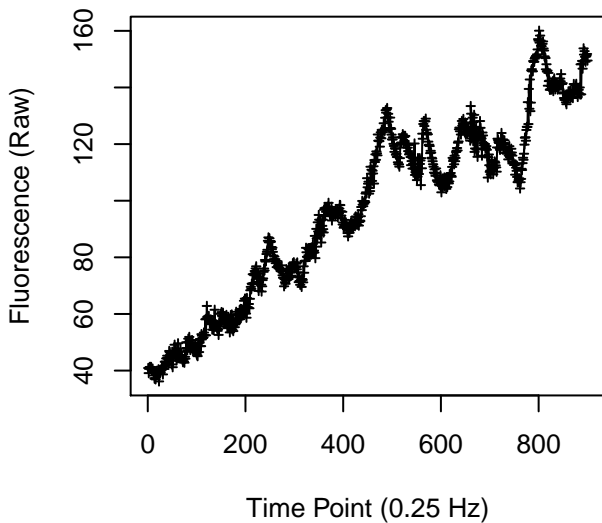

**Cell 356**

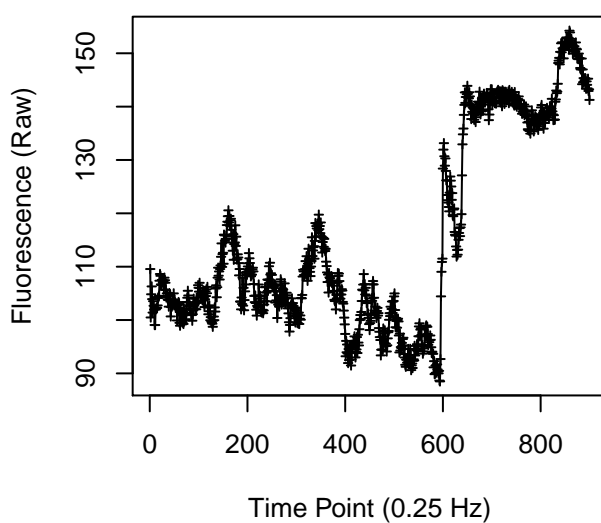

**Cell 357**

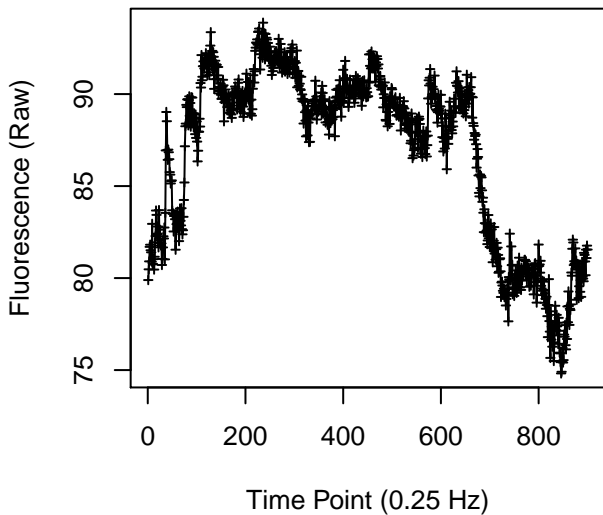

**Cell 358**

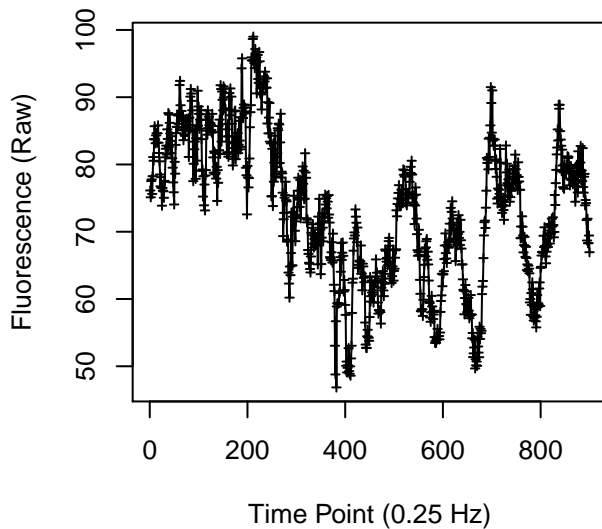

**Cell 359**

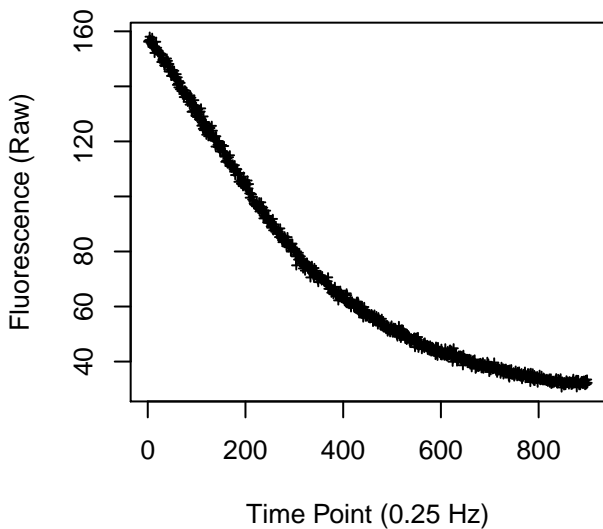

**Cell 360**

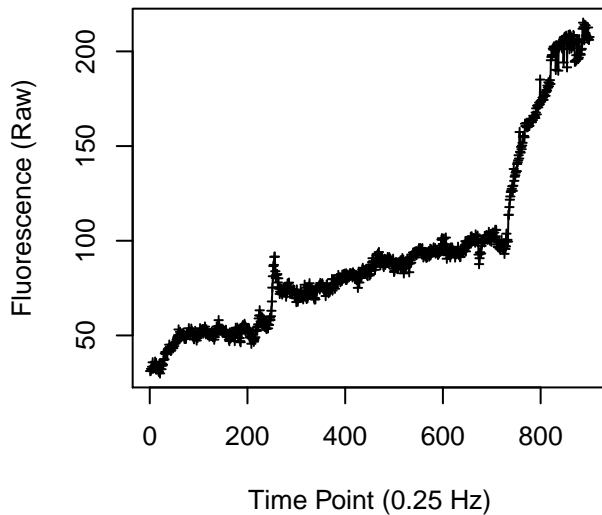



**Cell 361**

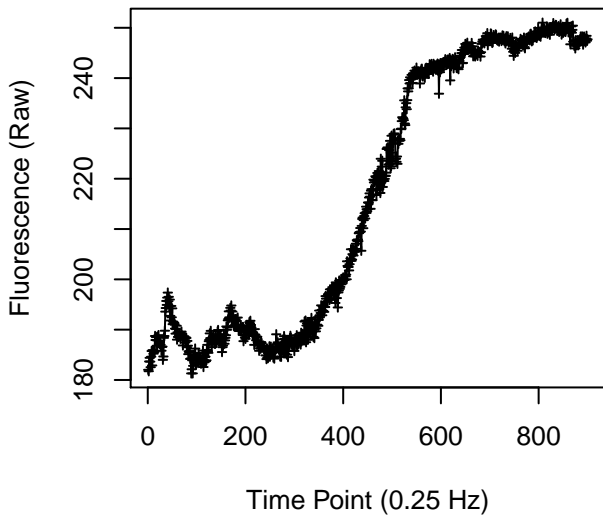

**Cell 362**

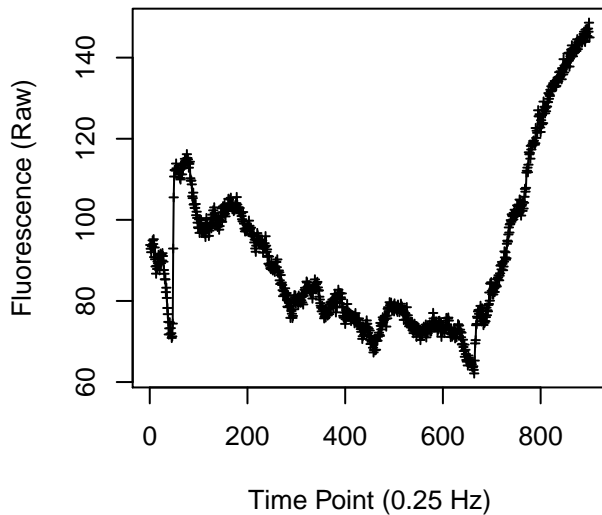

**Cell 363**

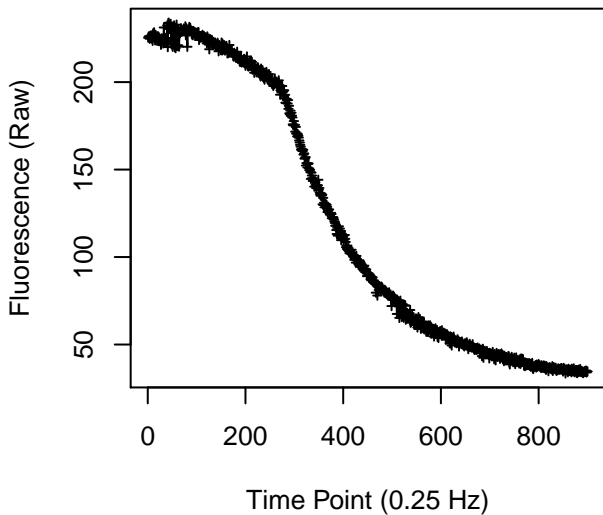

**Cell 364**

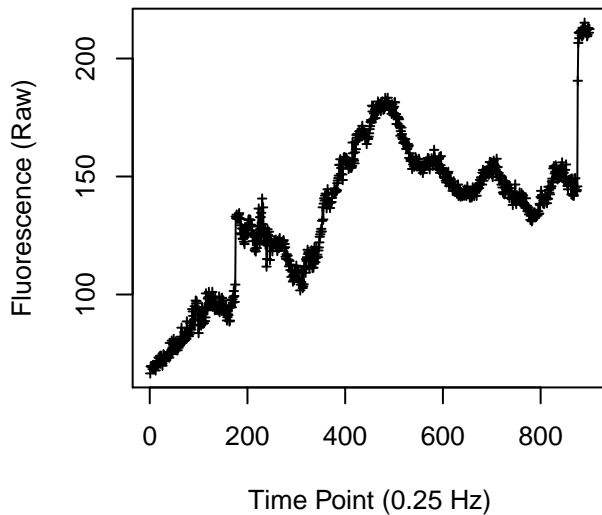

**Cell 365**

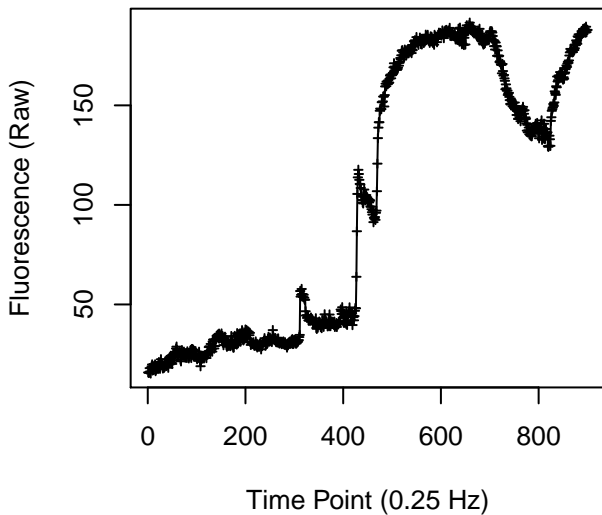

**Cell 366**

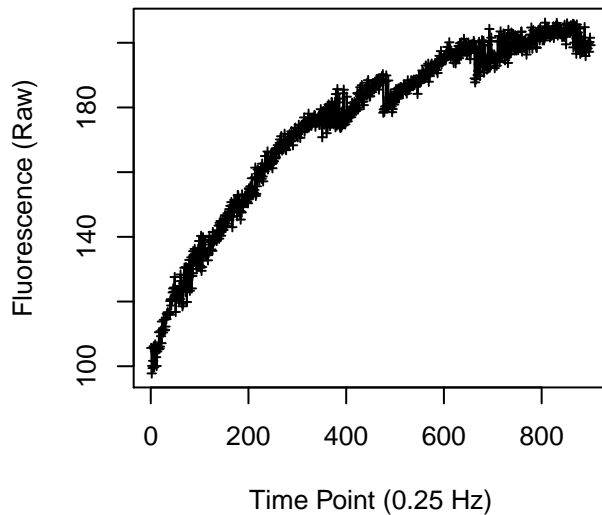

**Cell 367**

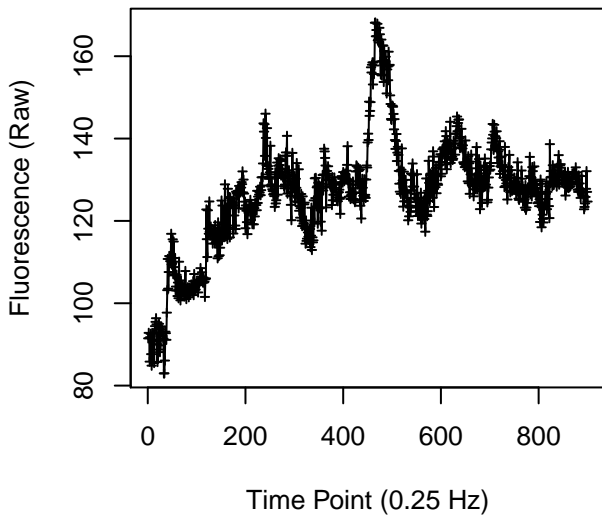

**Cell 368**

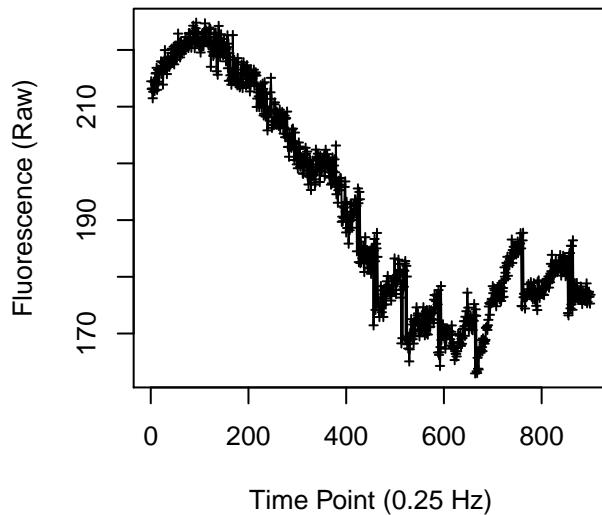

**Cell 369**

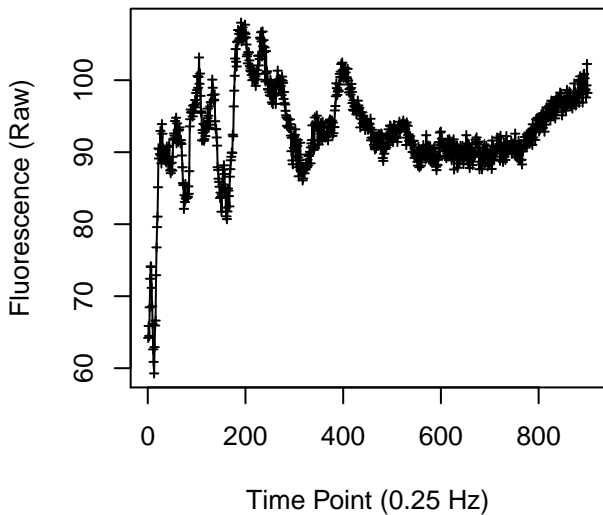

**Cell 370**

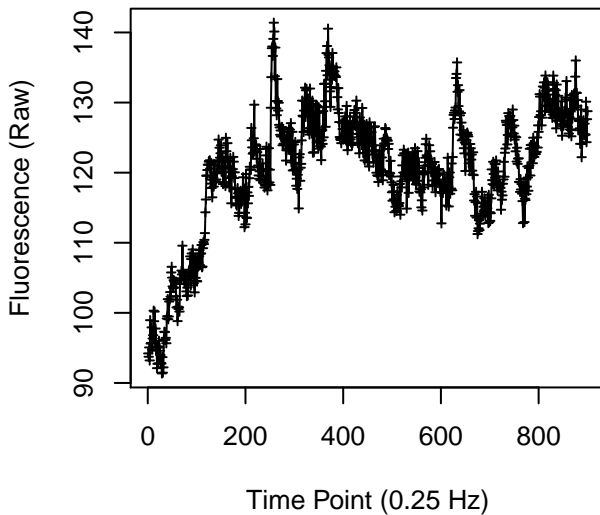

**Cell 371**

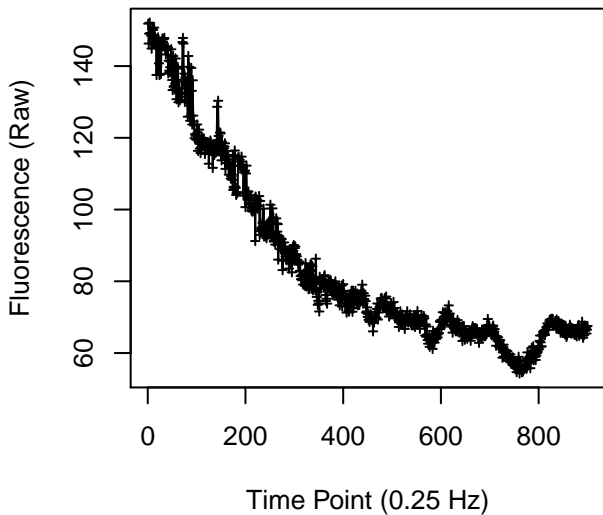

**Cell 372**

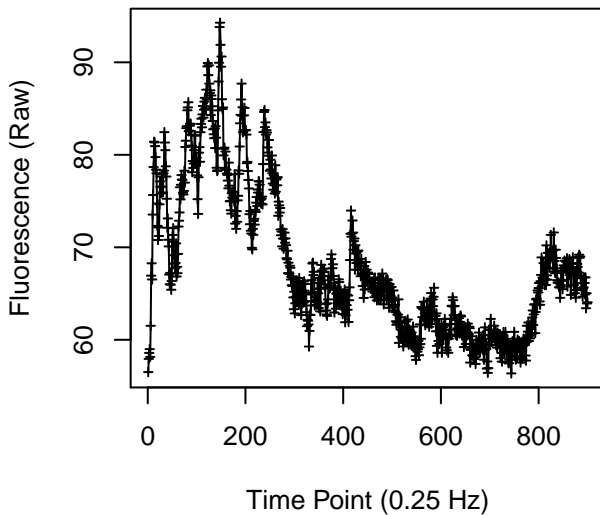

**Cell 373**

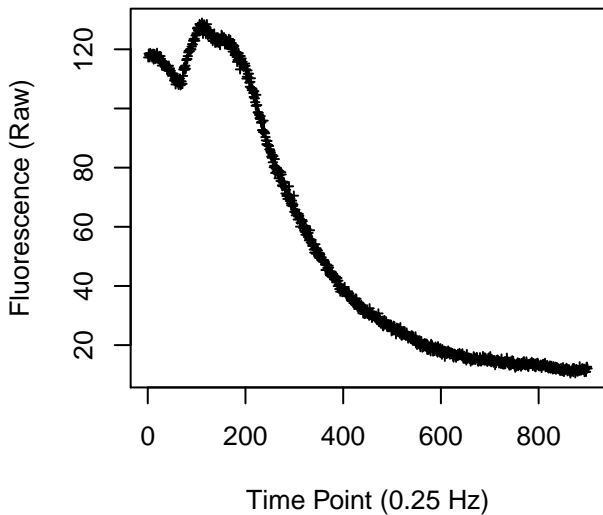

**Cell 374**

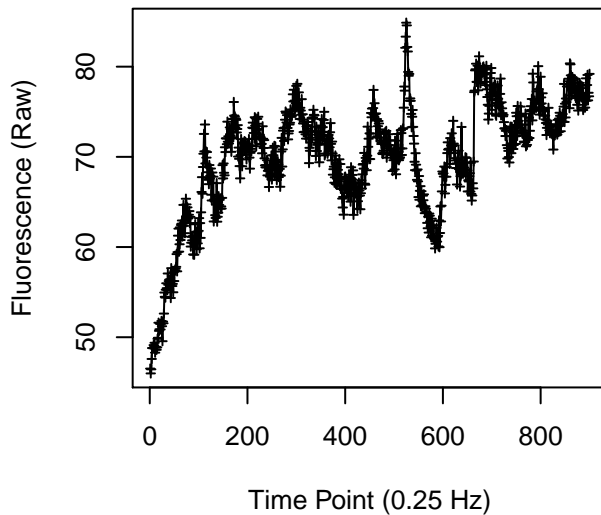

**Cell 375**

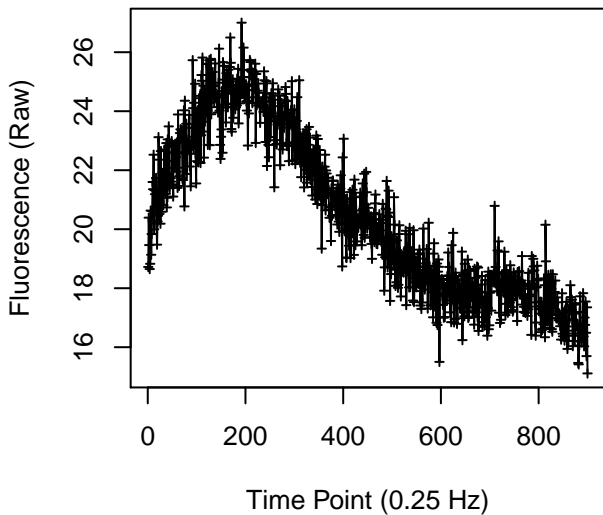

**Cell 376**

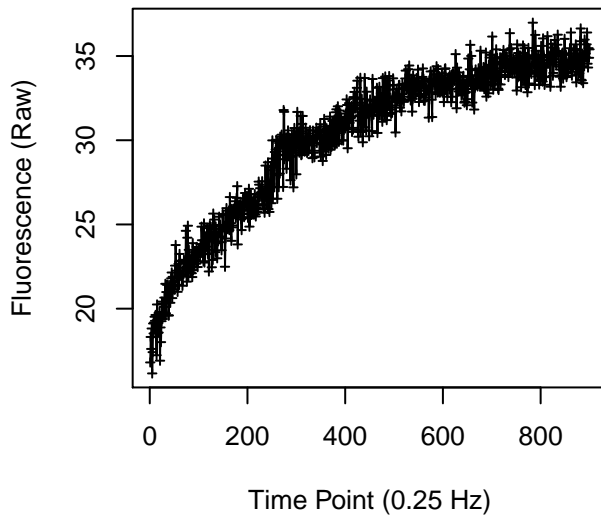

**Cell 377**

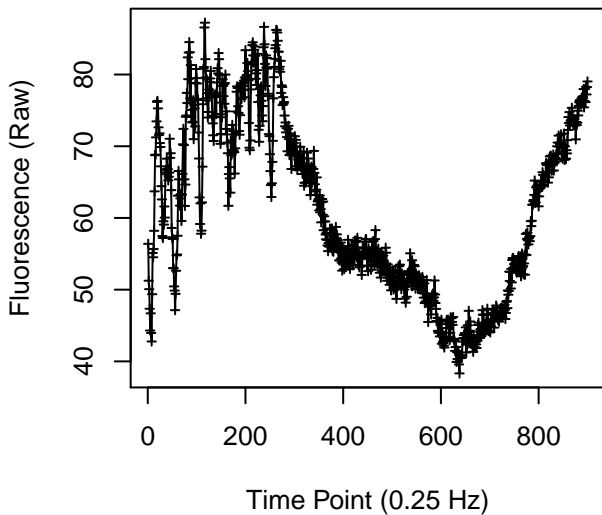

**Cell 378**

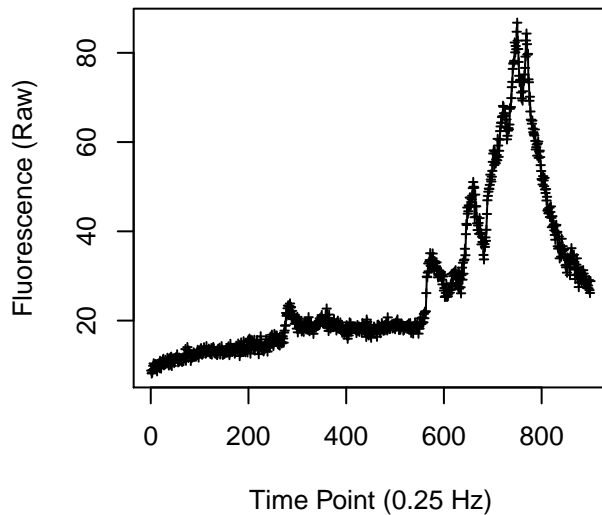

**Cell 379**

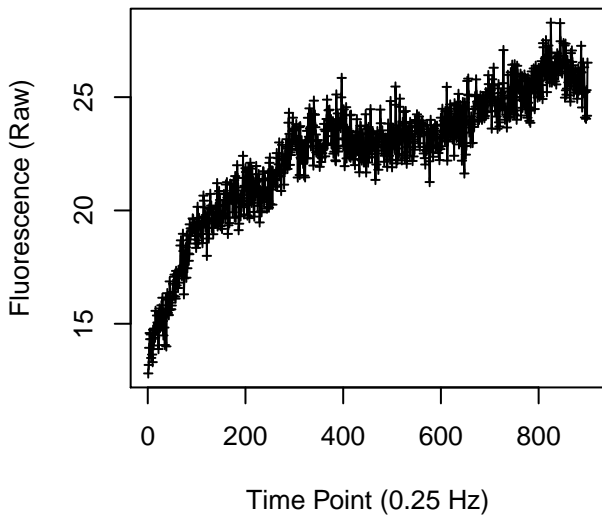

**Cell 380**

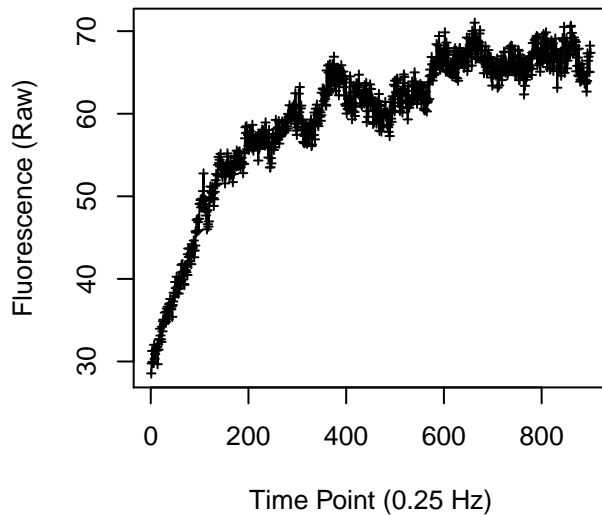

**Cell 381**

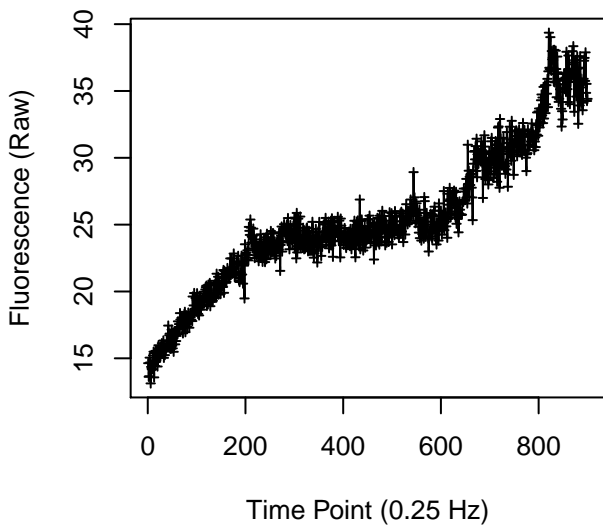

**Cell 382**

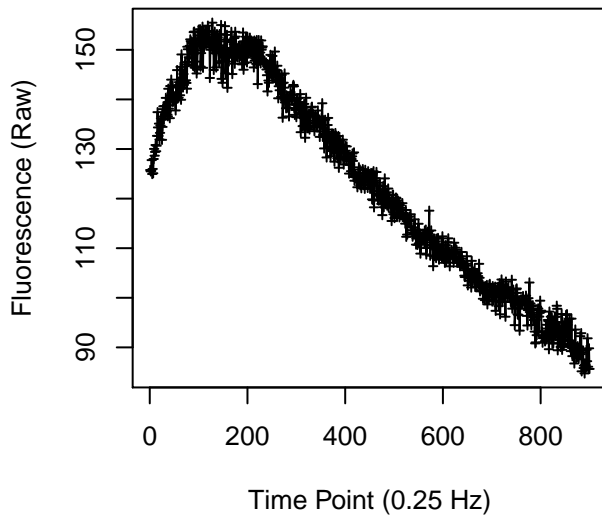

**Cell 383**

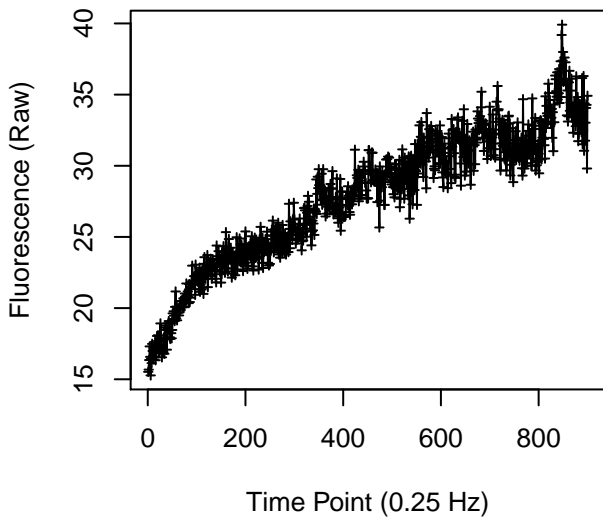

**Cell 384**

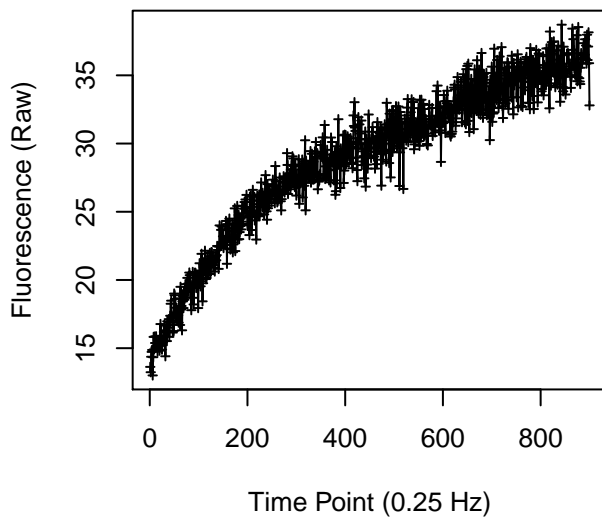

**Cell 385**

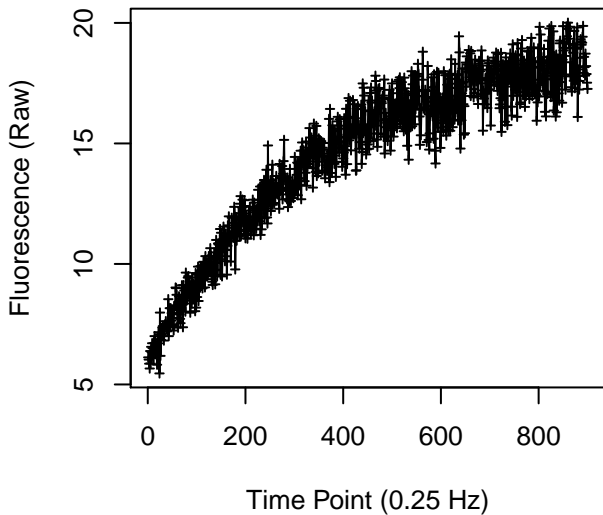

**Cell 386**

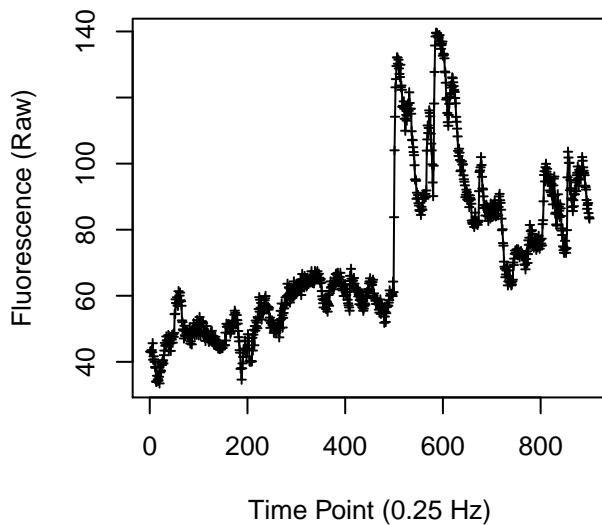

**Cell 387**

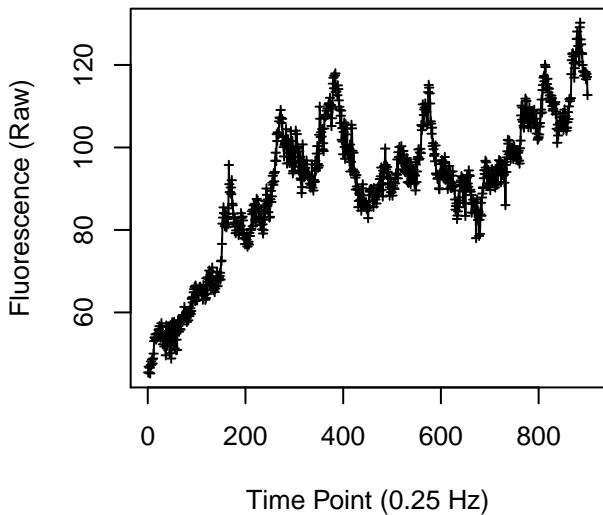

**Cell 388**

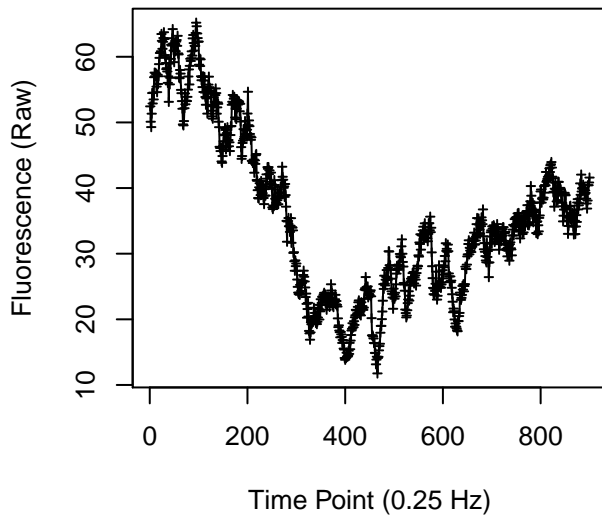

**Cell 389**

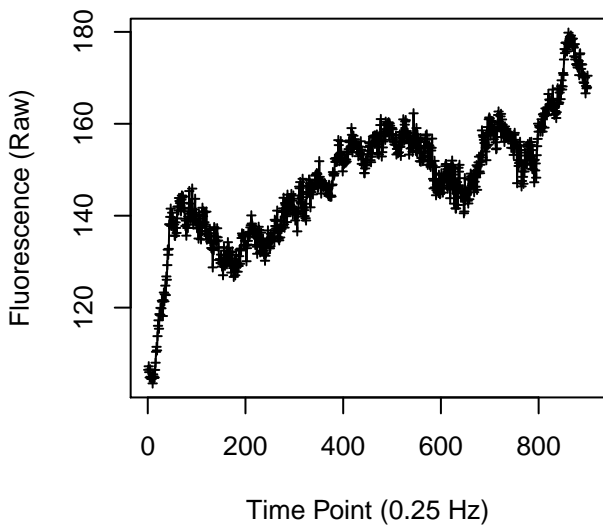

**Cell 390**

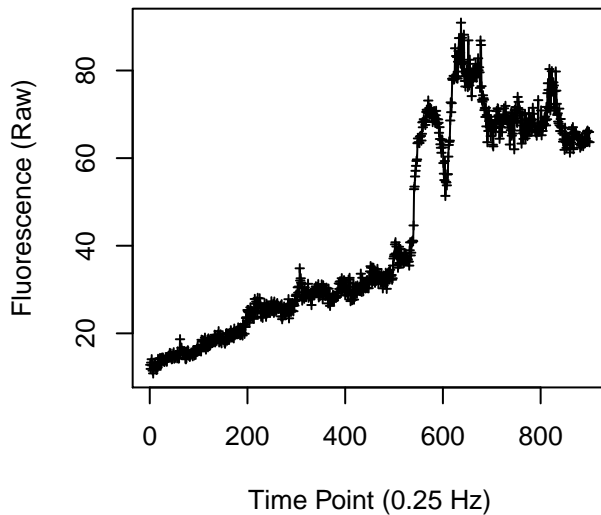

**Cell 391**

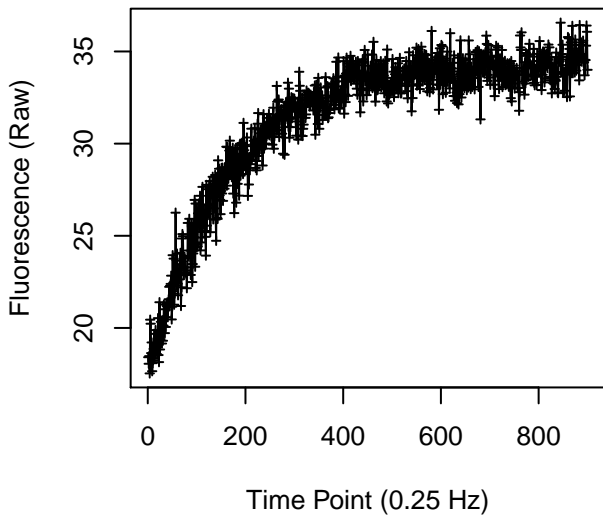

**Cell 392**

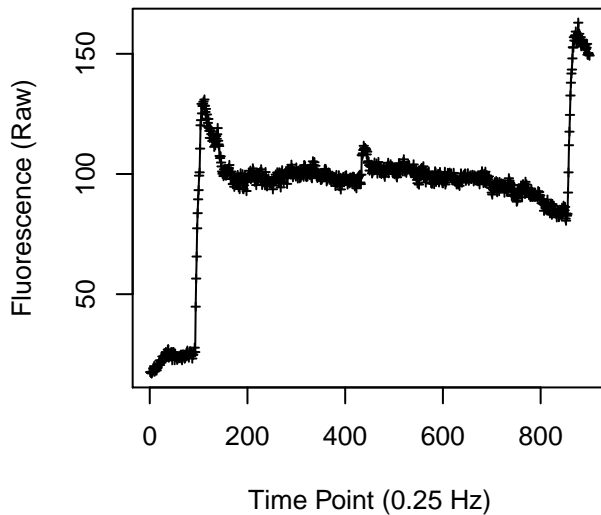



**Cell 393**

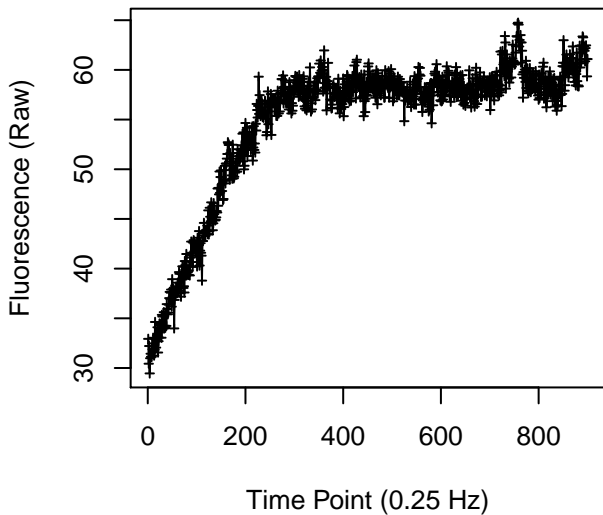

**Cell 394**

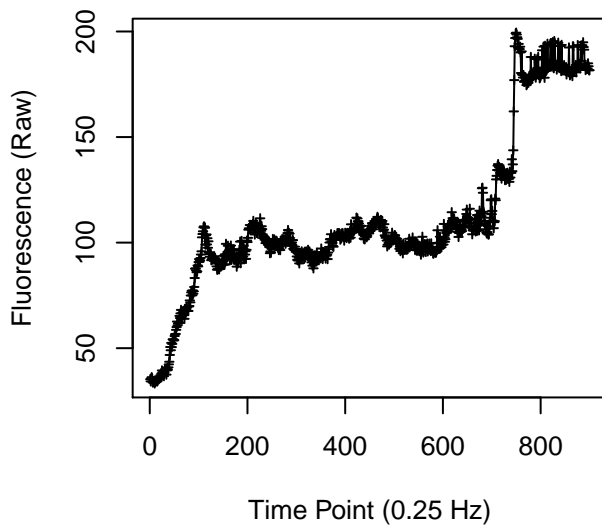

**Cell 395**

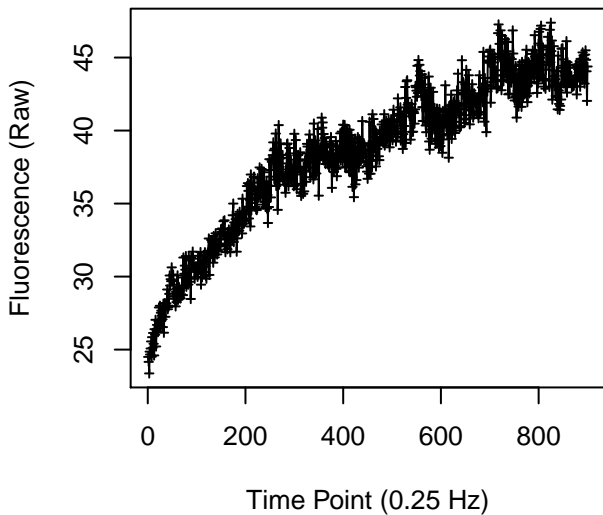

**Cell 396**

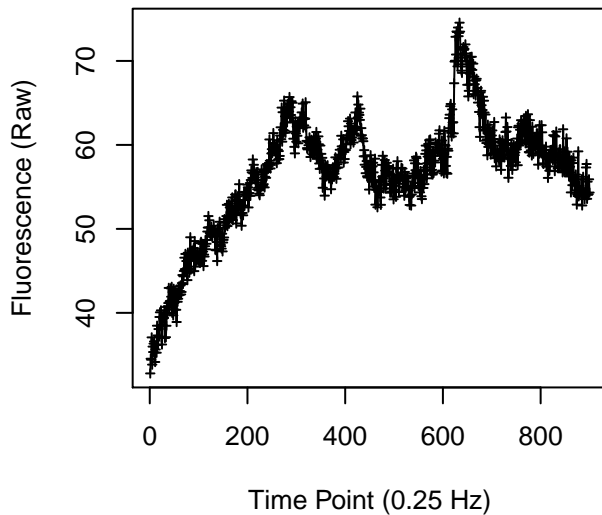

**Cell 397**

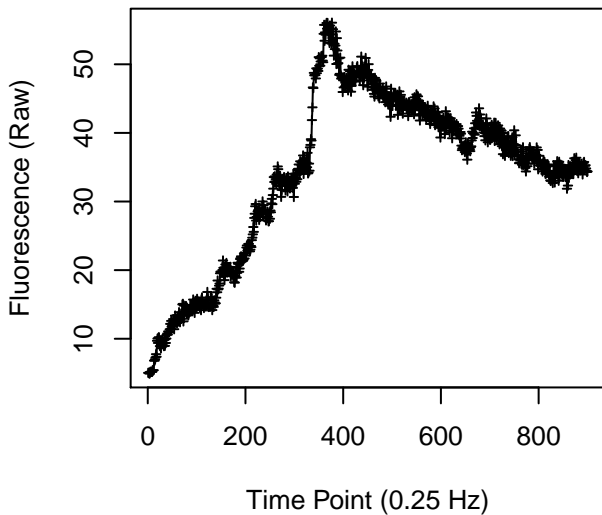

**Cell 398**

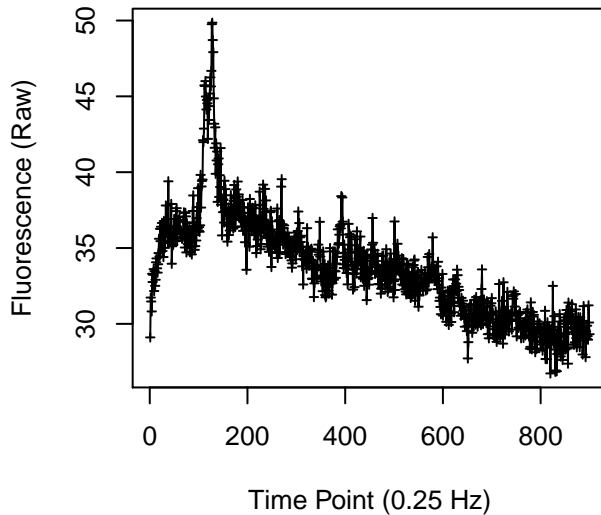

**Cell 399**

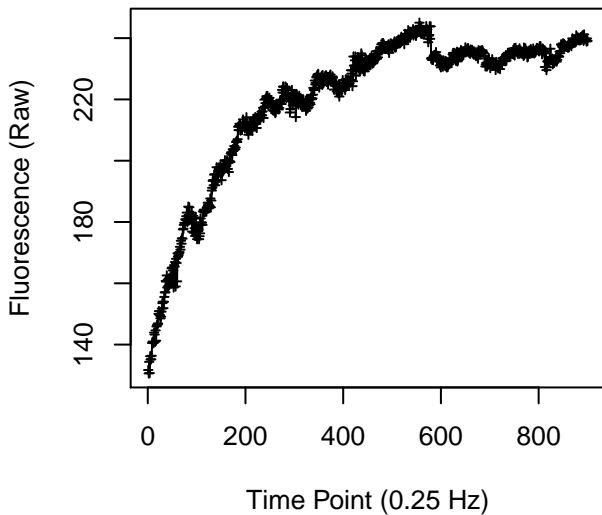

**Cell 400**

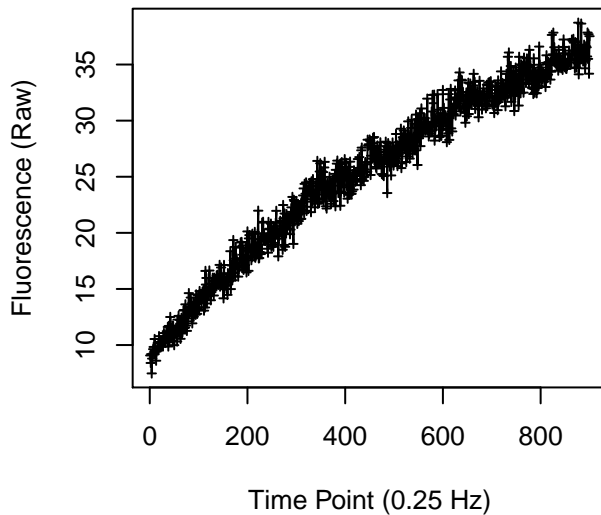

**Cell 401**

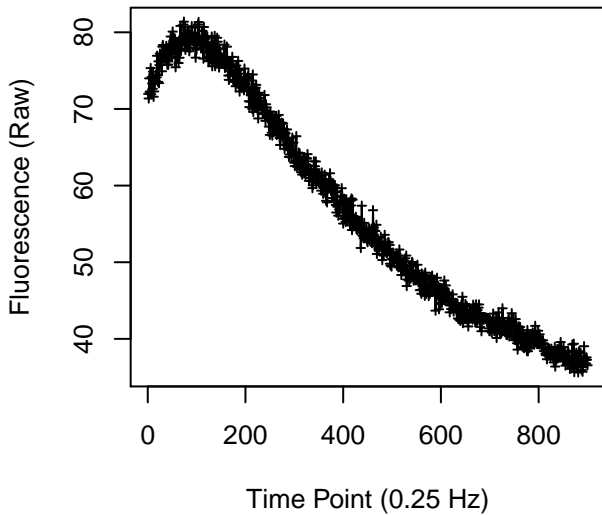

**Cell 402**

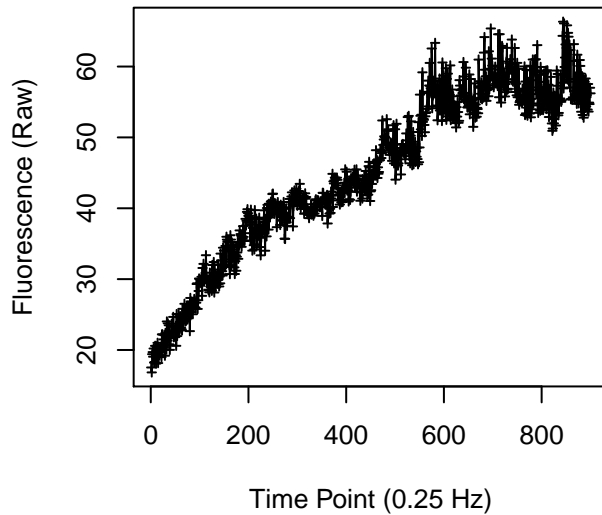

**Cell 403**

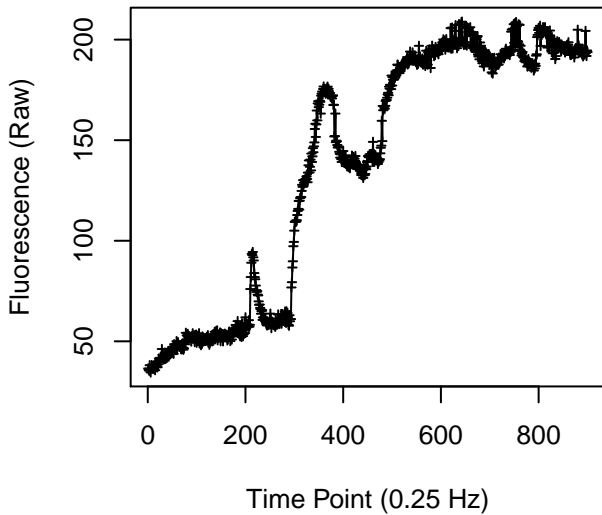

**Cell 404**

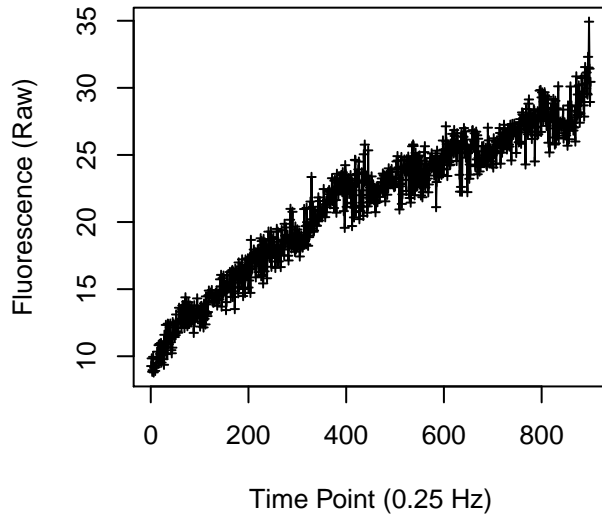

**Cell 405**

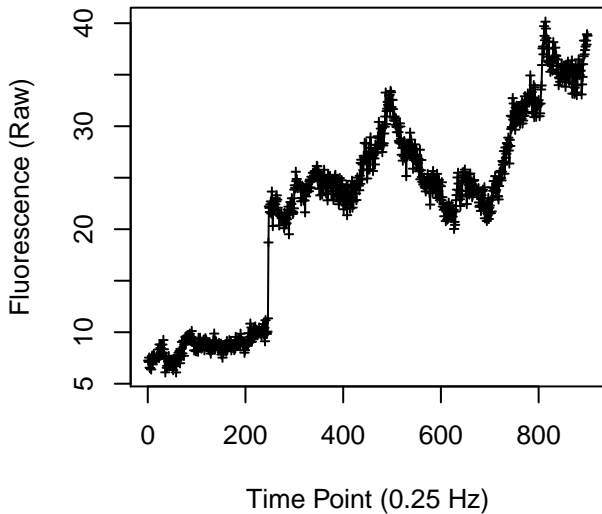

**Cell 406**

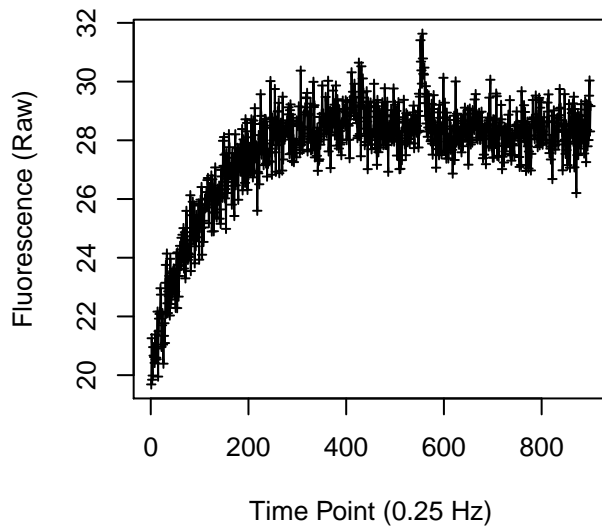

**Cell 407**

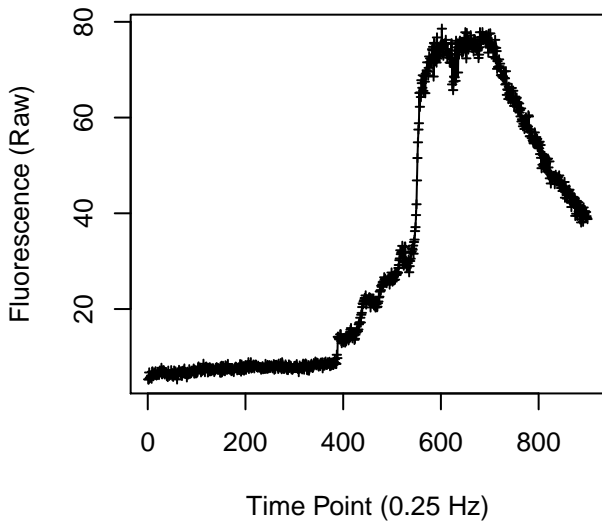

**Cell 408**

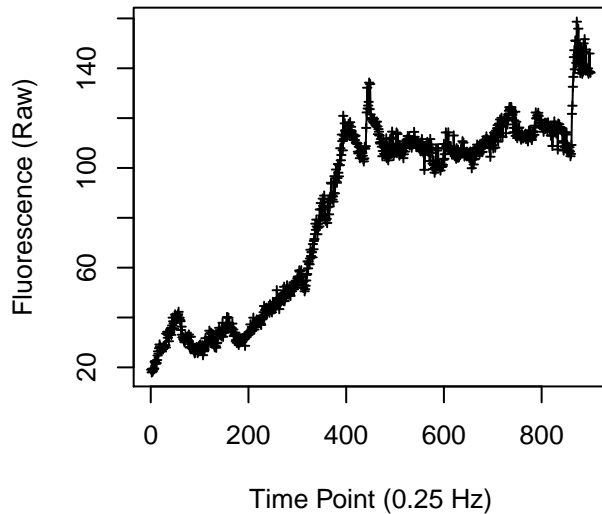

**Cell 409**

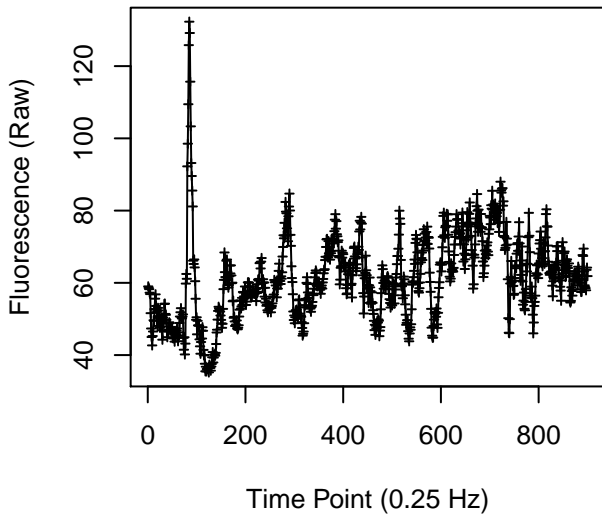

**Cell 410**

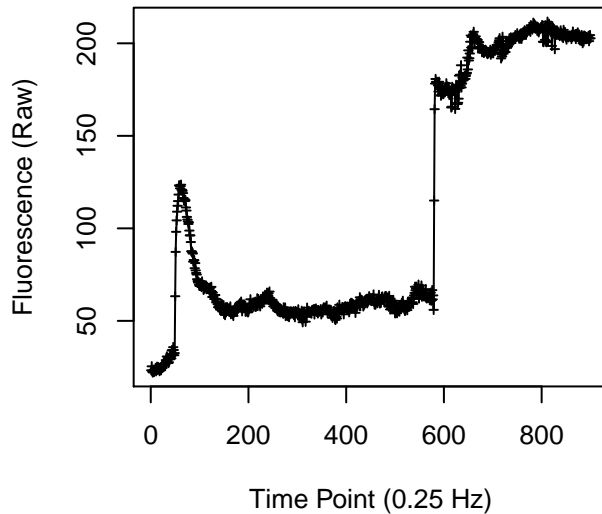

**Cell 411**

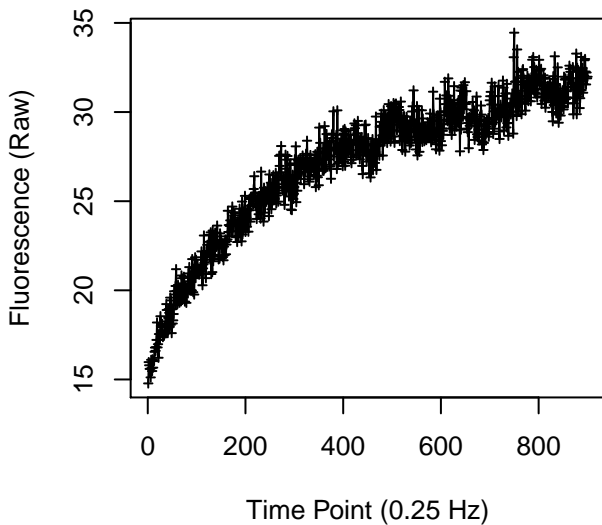

**Cell 412**

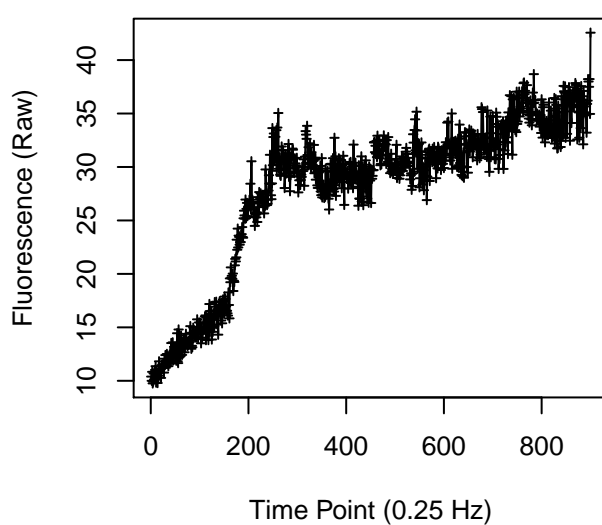

**Cell 413**

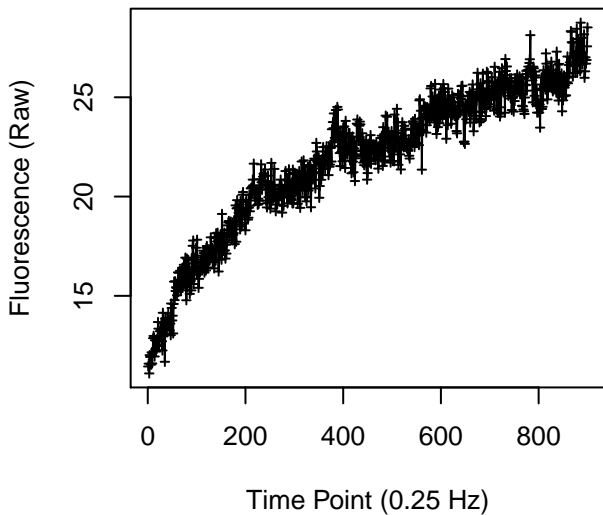

**Cell 414**

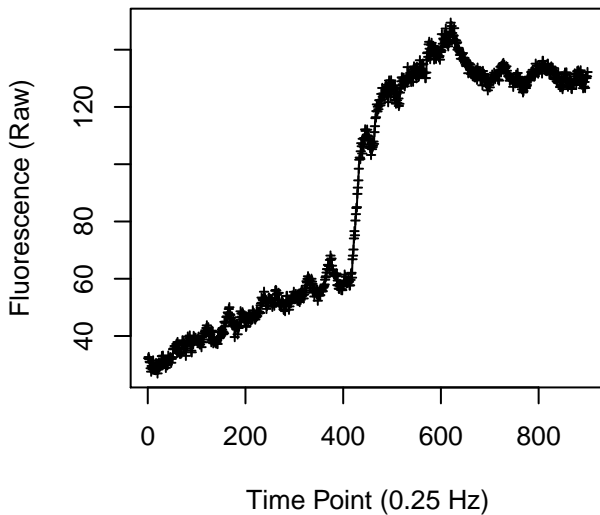

**Cell 415**

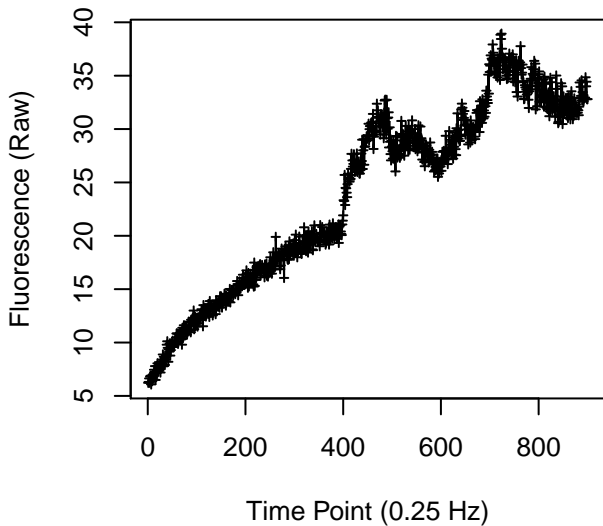

**Cell 416**

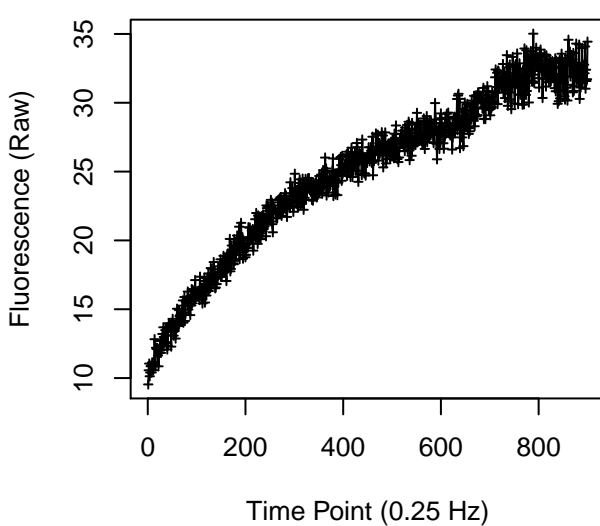

**Cell 417**

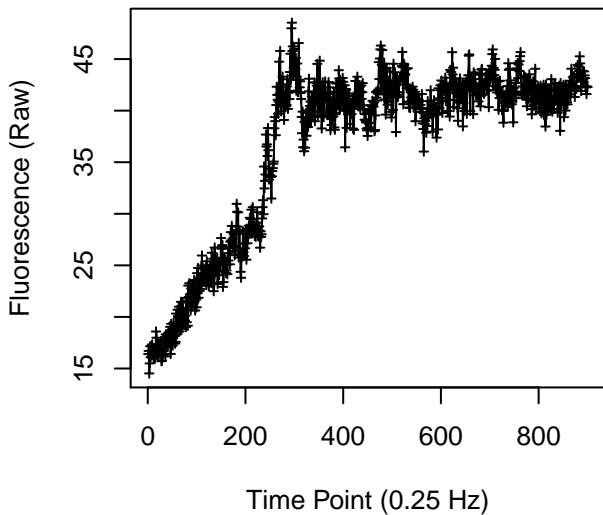

**Cell 418**

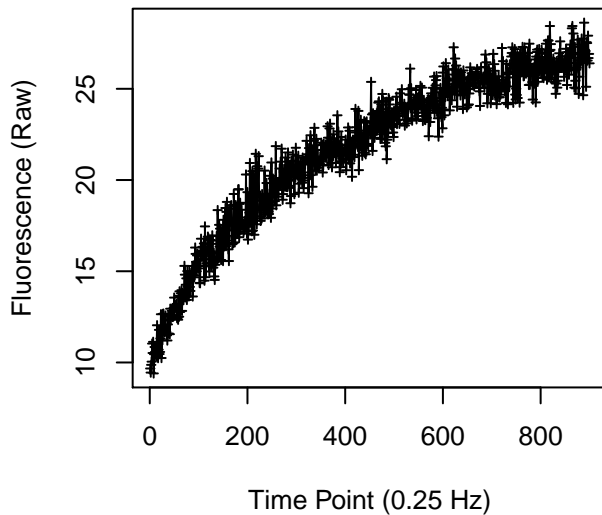

**Cell 419**

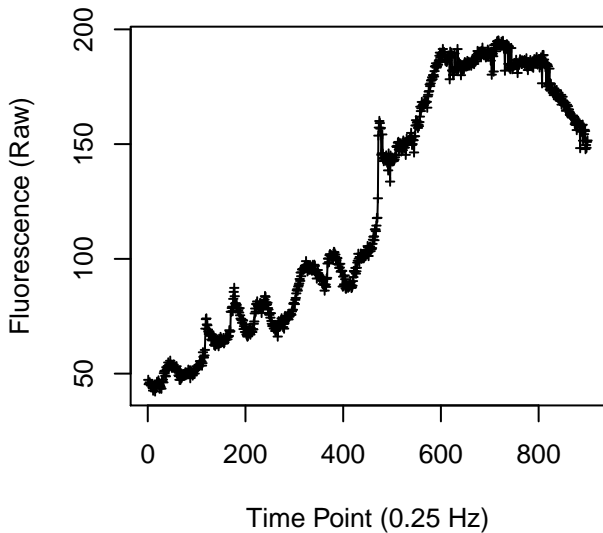

**Cell 420**

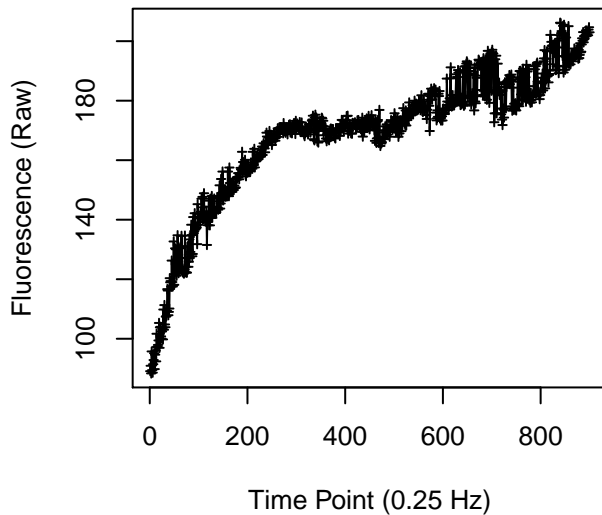

**Cell 421**

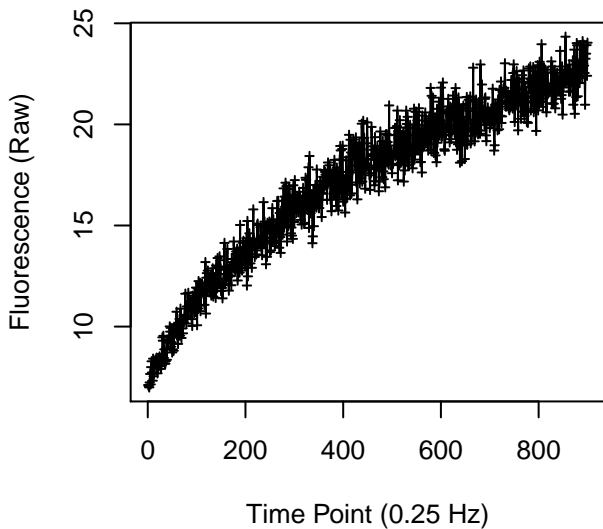

**Cell 422**

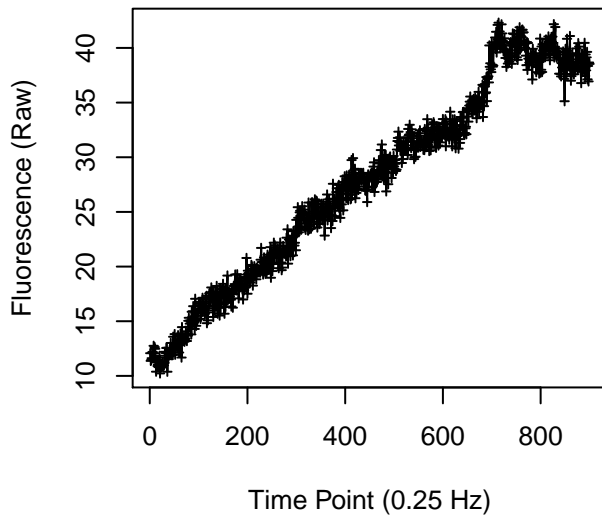

**Cell 423**

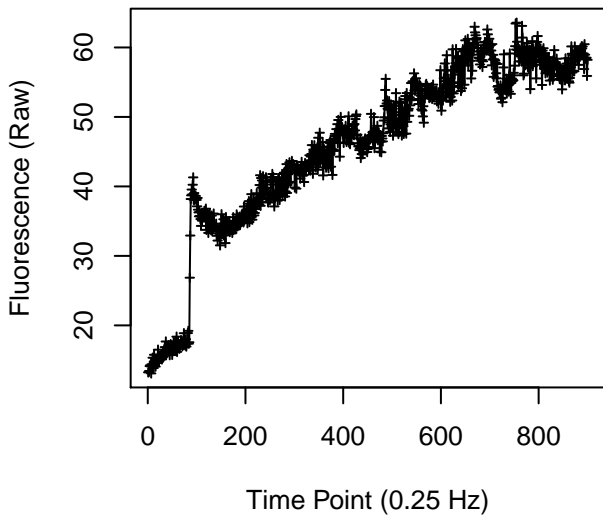

**Cell 424**

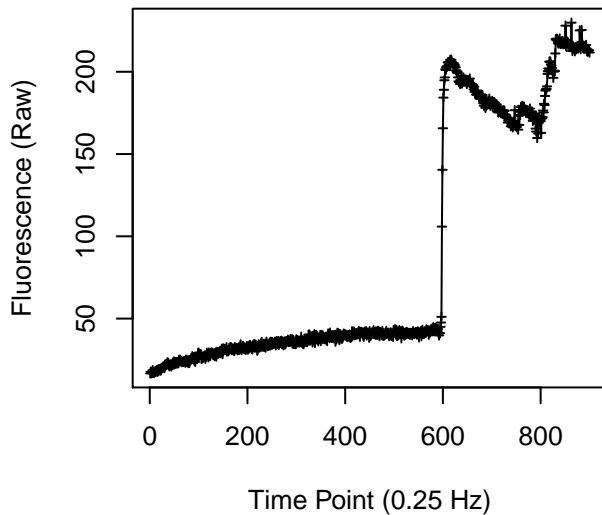



**Cell 425**

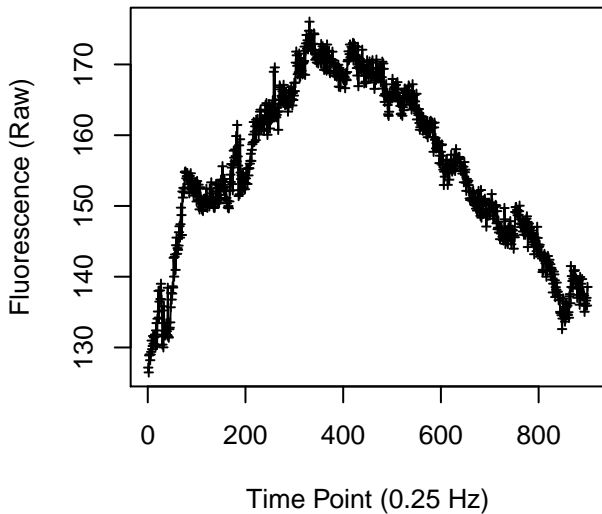

**Cell 426**

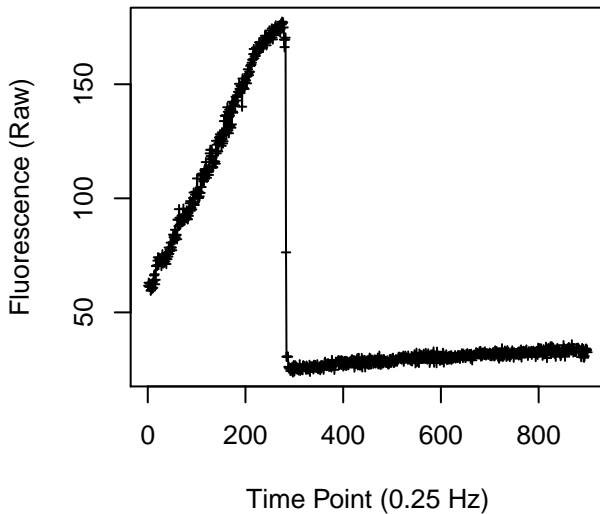

**Cell 427**

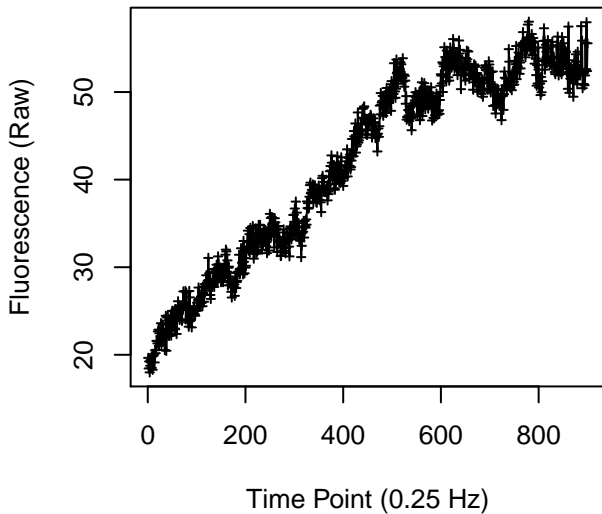

**Cell 428**

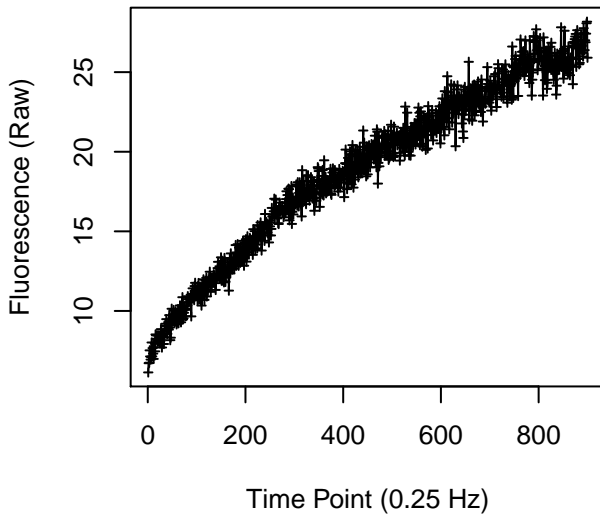

**Cell 429**

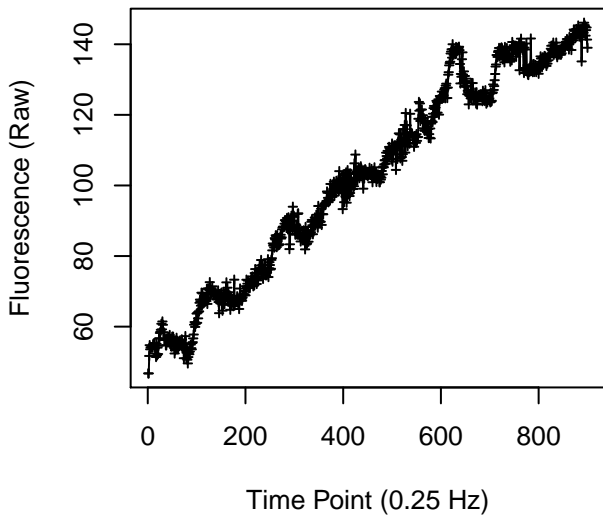

**Cell 430**

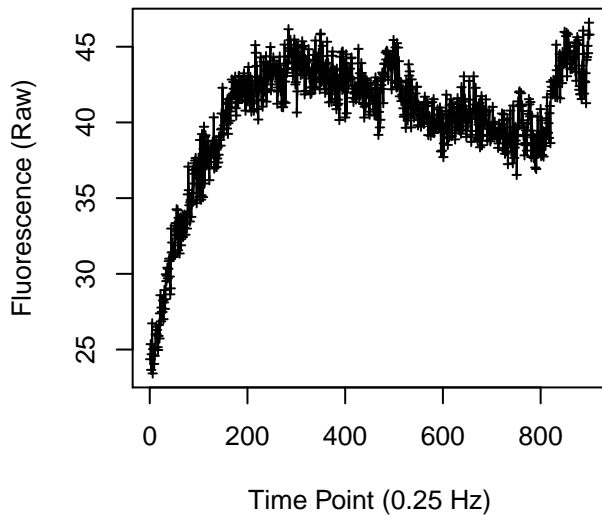

**Cell 431**

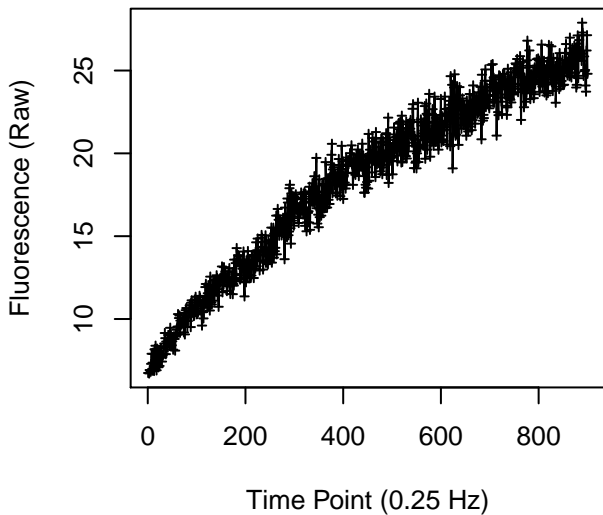

**Cell 432**

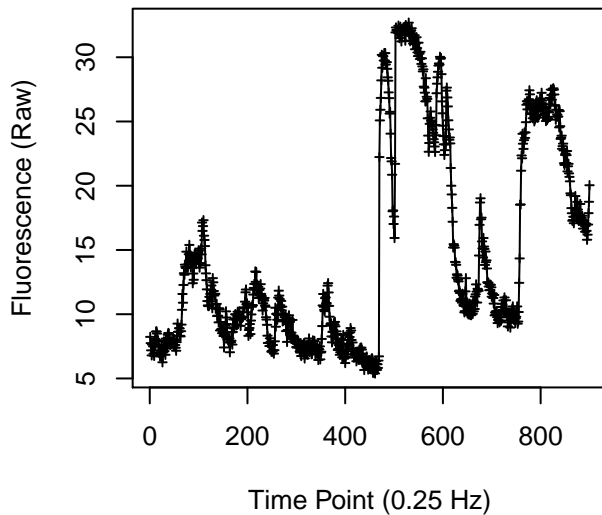

**Cell 433**

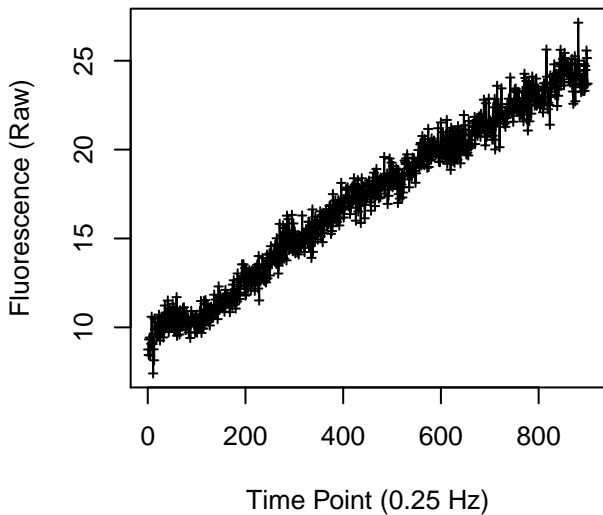

**Cell 434**

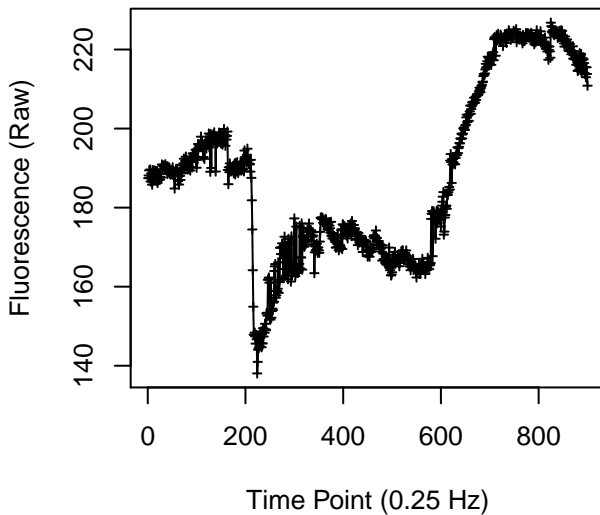

**Cell 435**

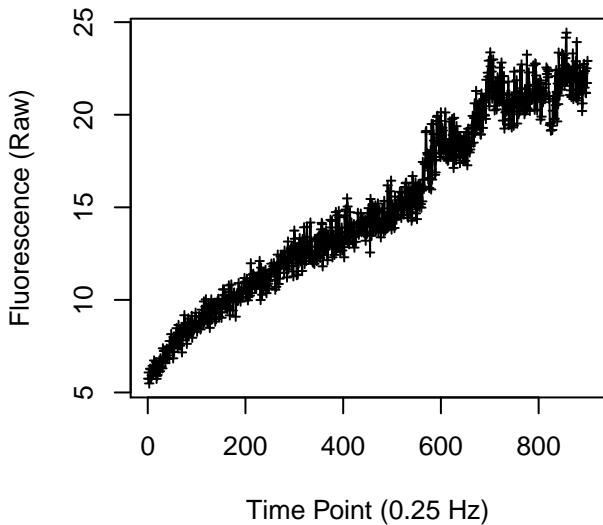

**Cell 436**

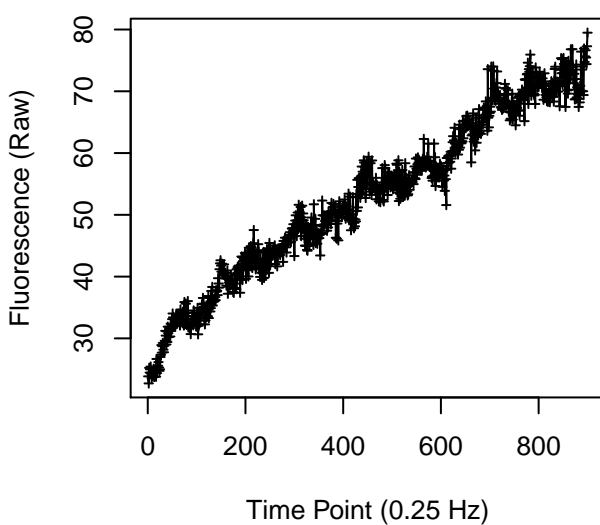

**Cell 437**

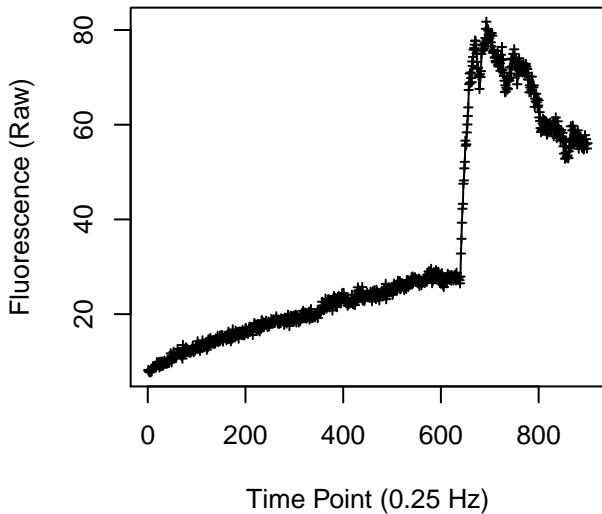

**Cell 438**

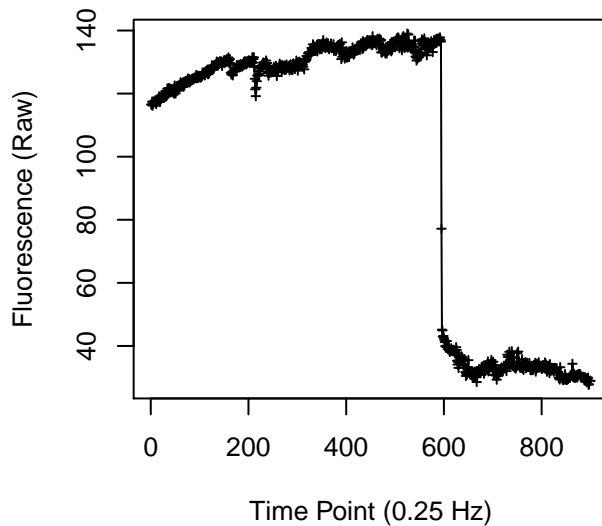

**Cell 439**

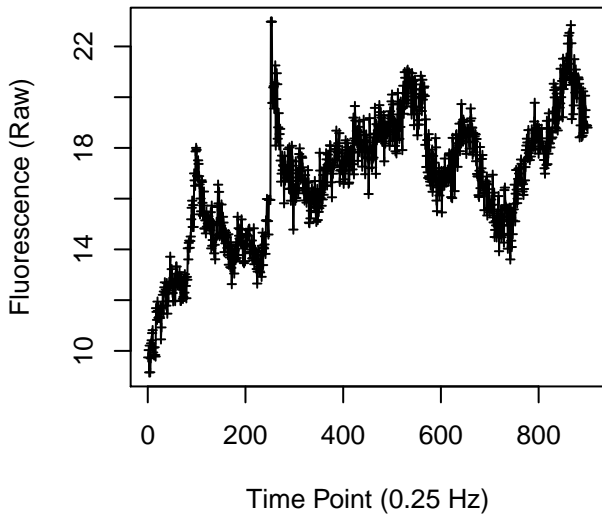

**Cell 440**

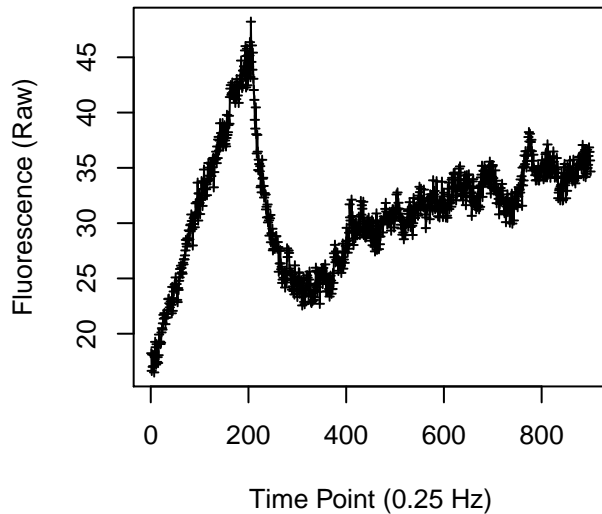

**Cell 441**

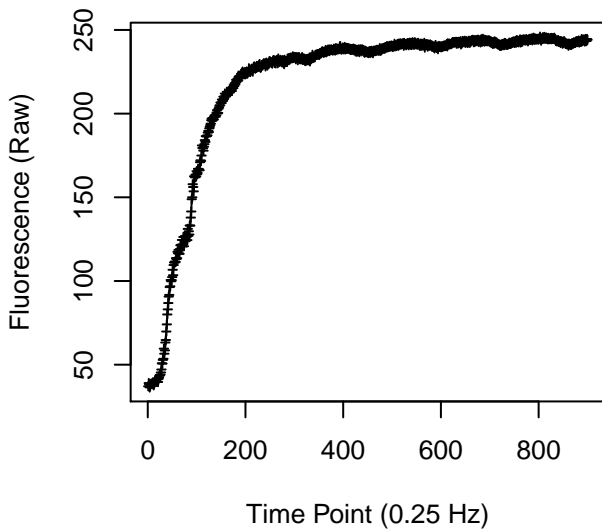

**Cell 442**

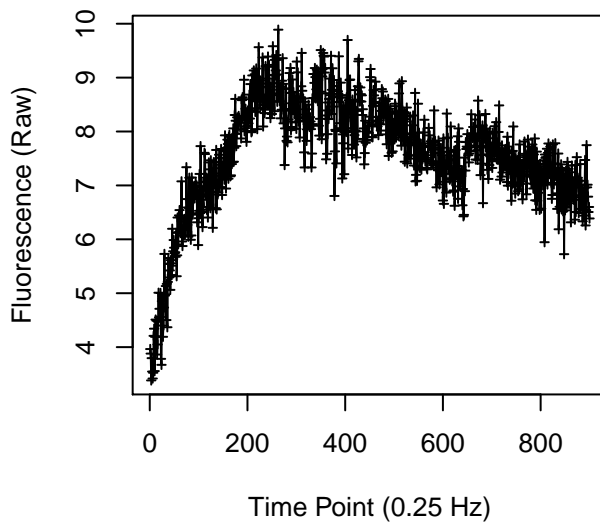

**Cell 443**

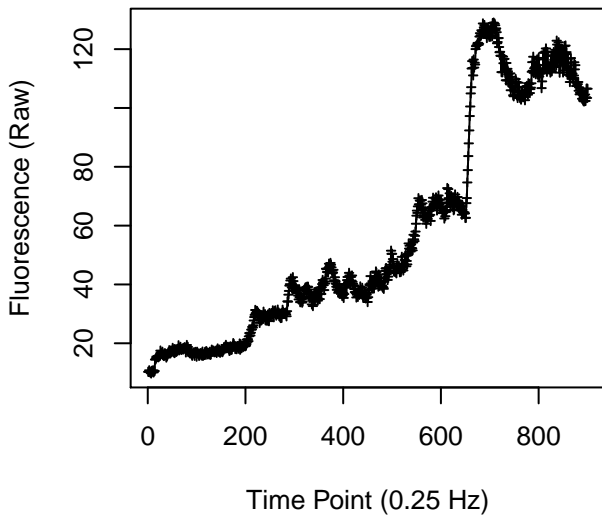

**Cell 444**

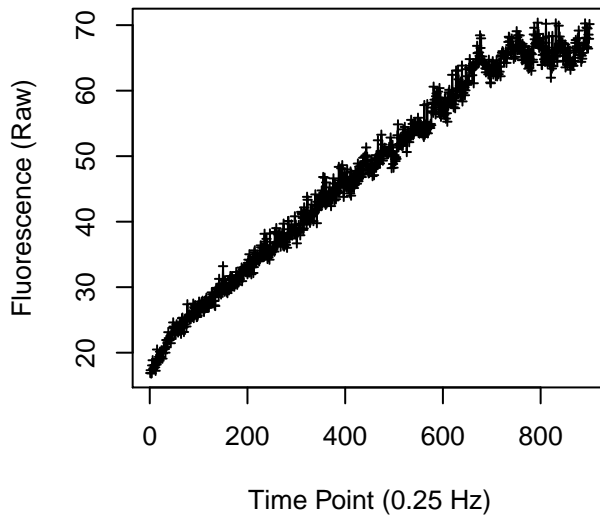

**Cell 445**

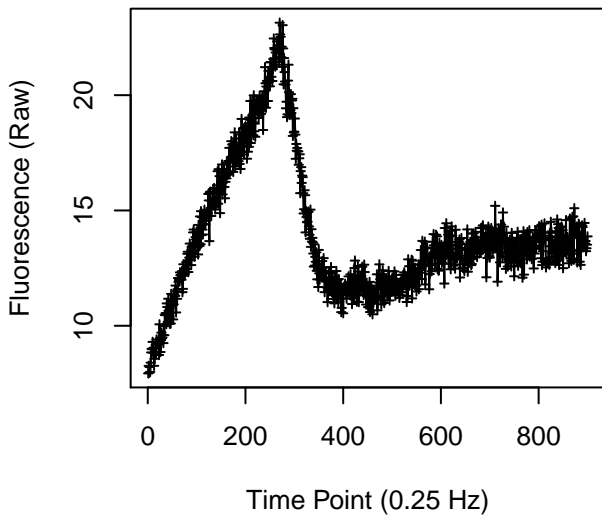

**Cell 446**

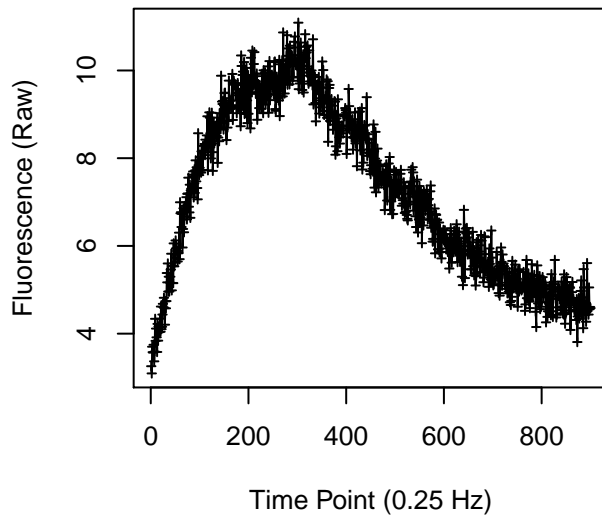

**Cell 447**

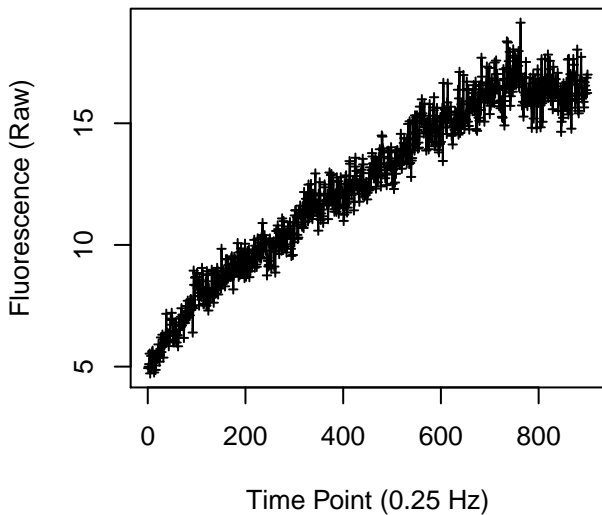

**Cell 448**

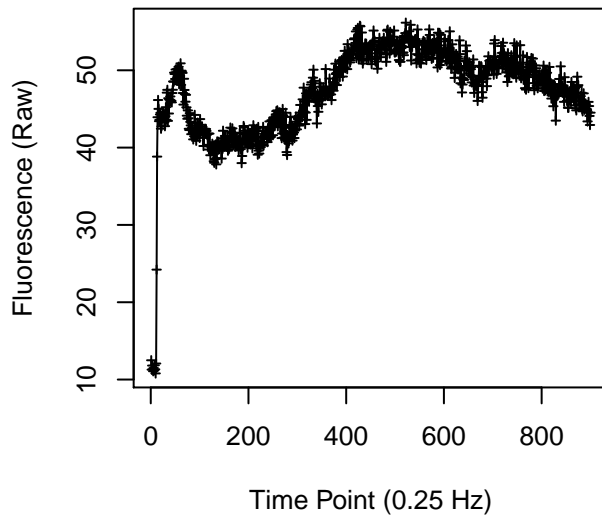

**Cell 449**

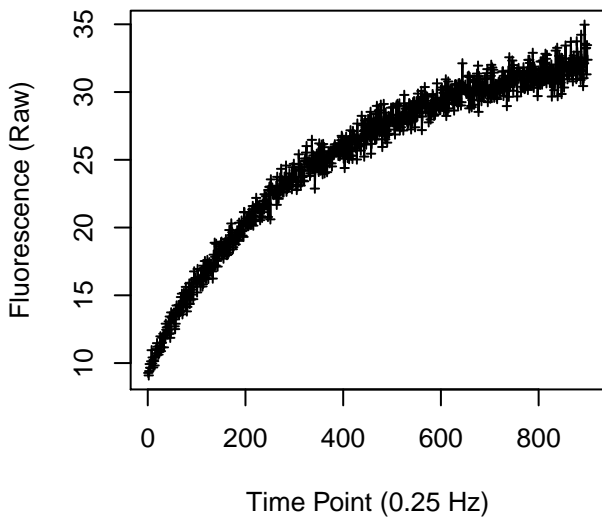

**Cell 450**

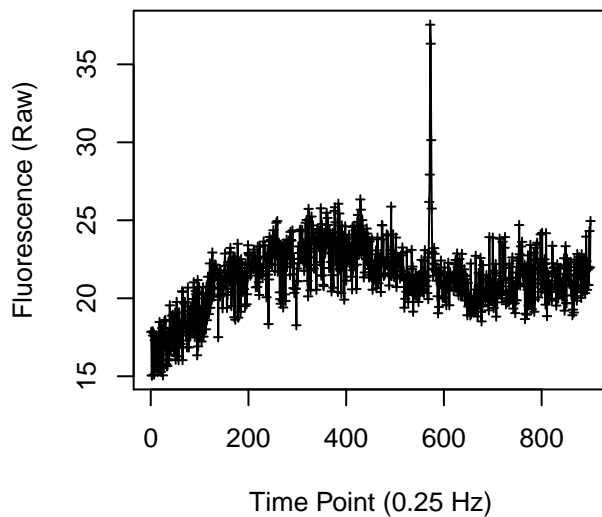

**Cell 451**

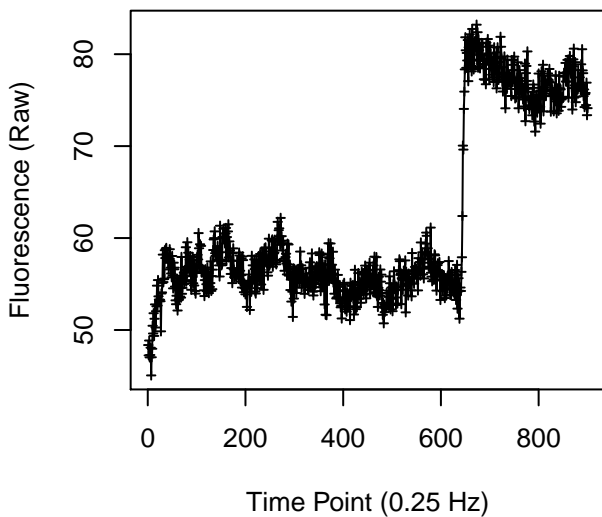

**Cell 452**

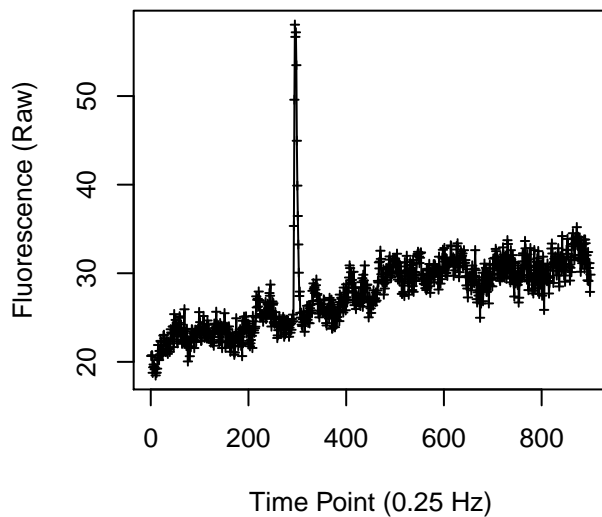

**Cell 453**

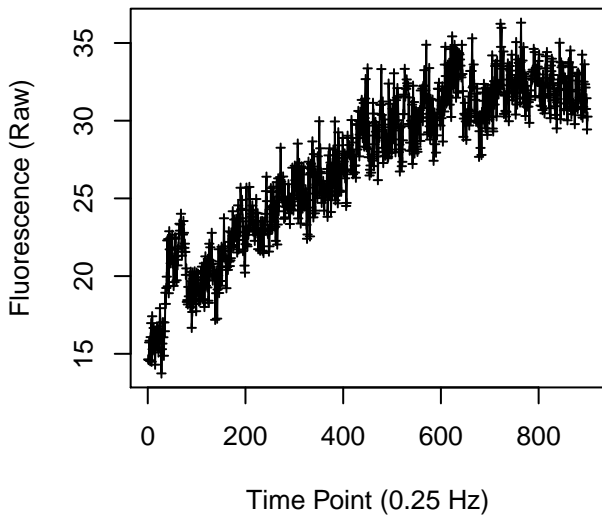

**Cell 454**

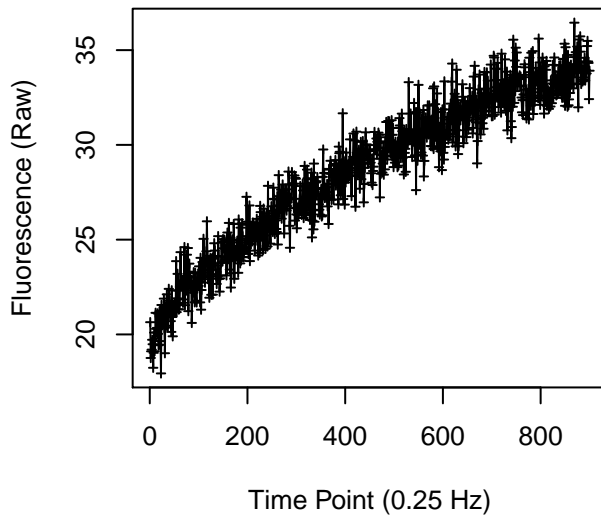

**Cell 455**

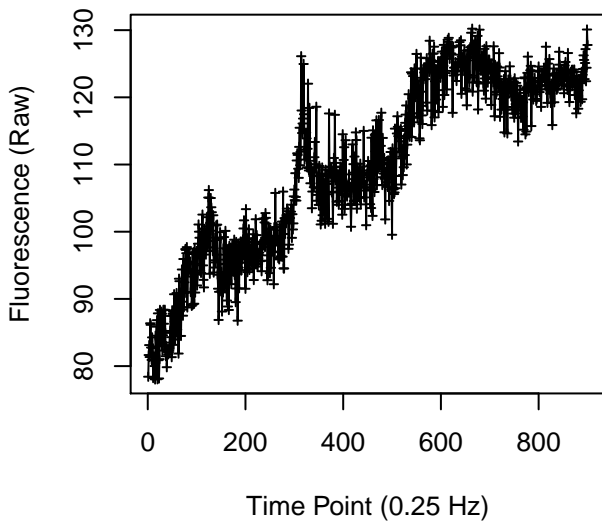

**Cell 456**

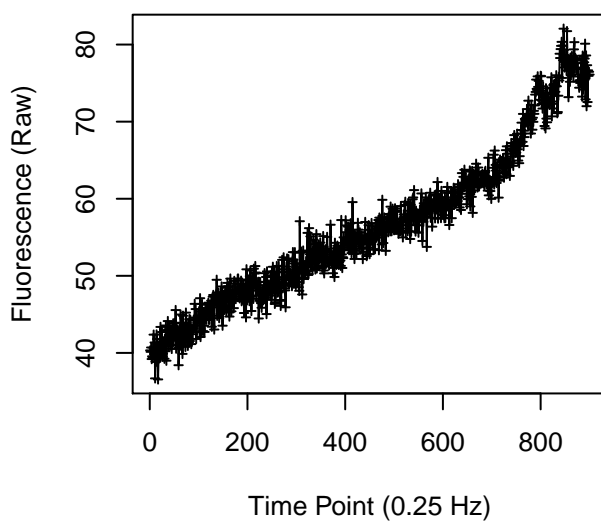



**Cell 457**

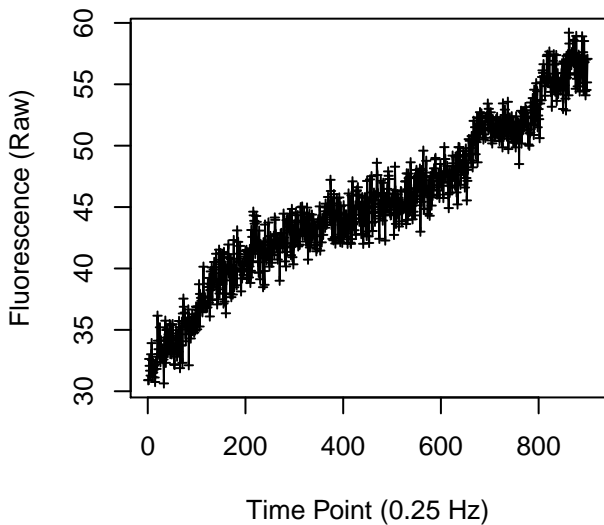

**Cell 458**

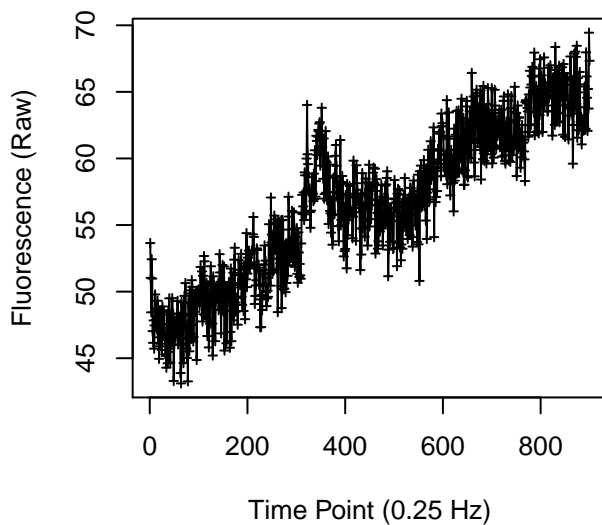

**Cell 459**

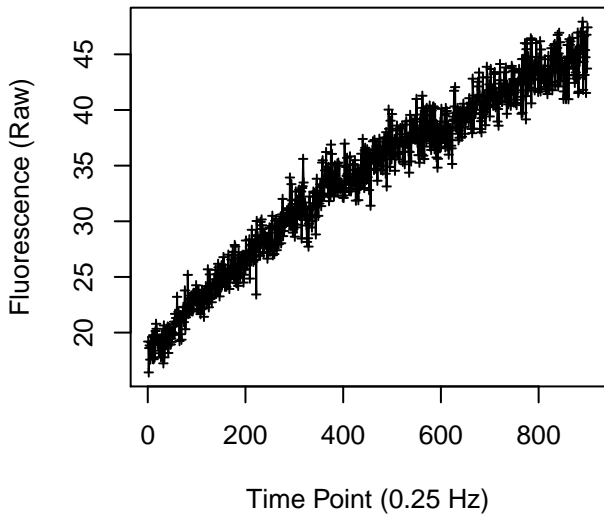

**Cell 460**

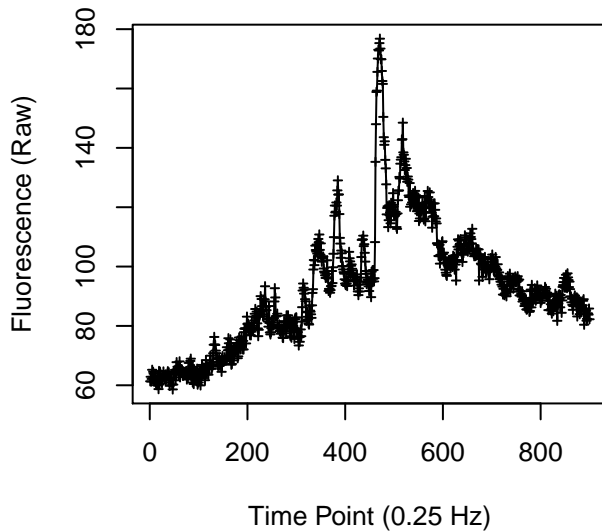

**Cell 461**

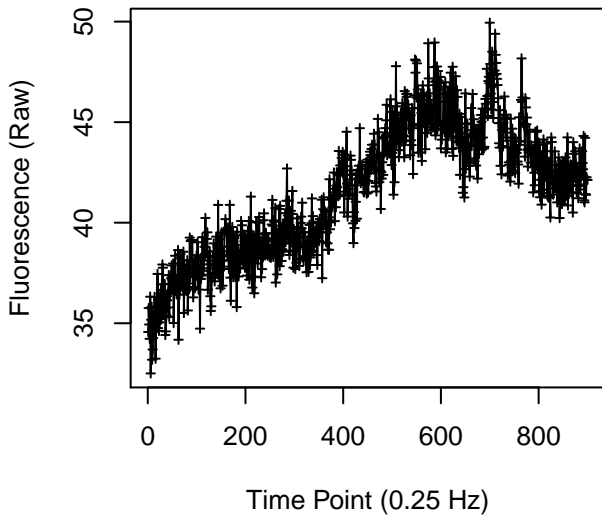

**Cell 462**

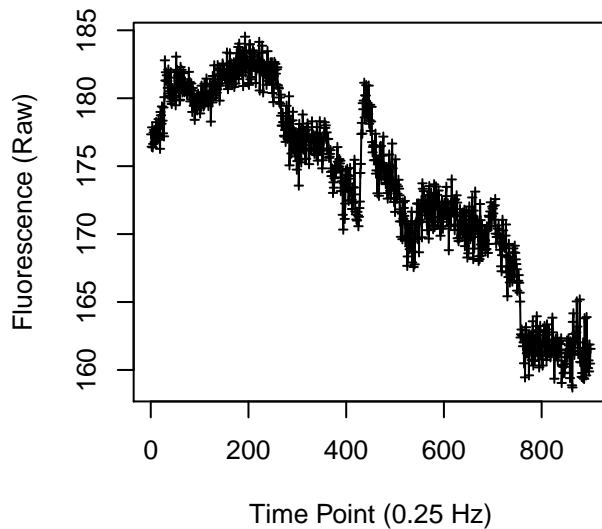

**Cell 463**

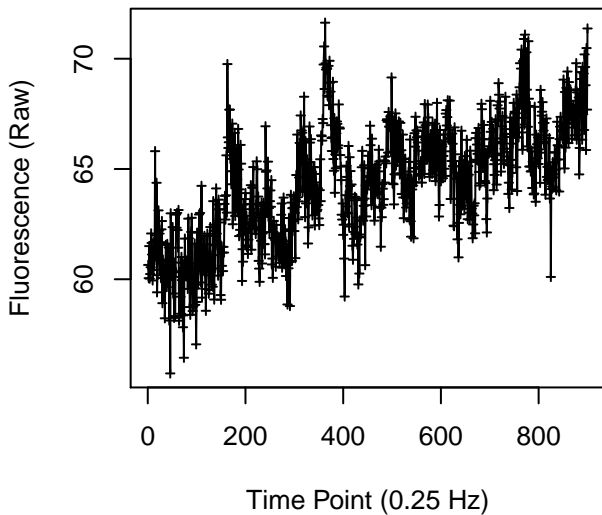

**Cell 464**

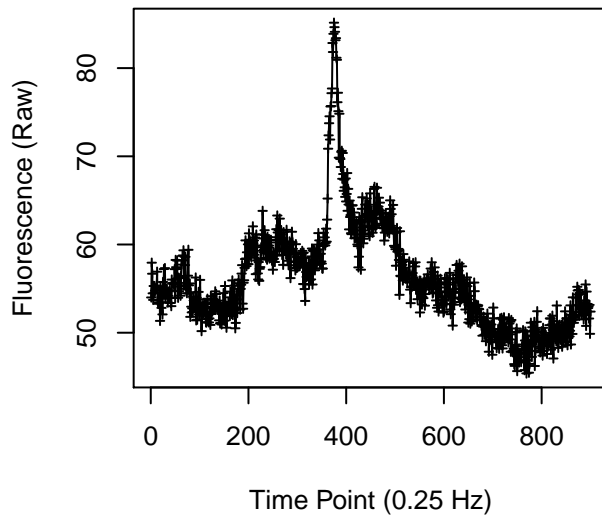

**Cell 465**

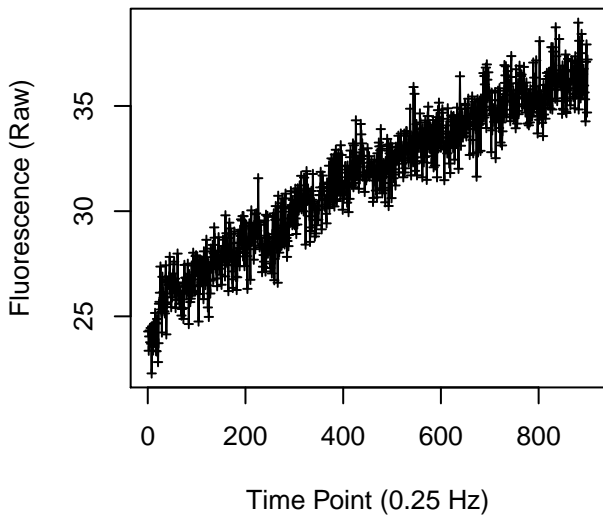

**Cell 466**

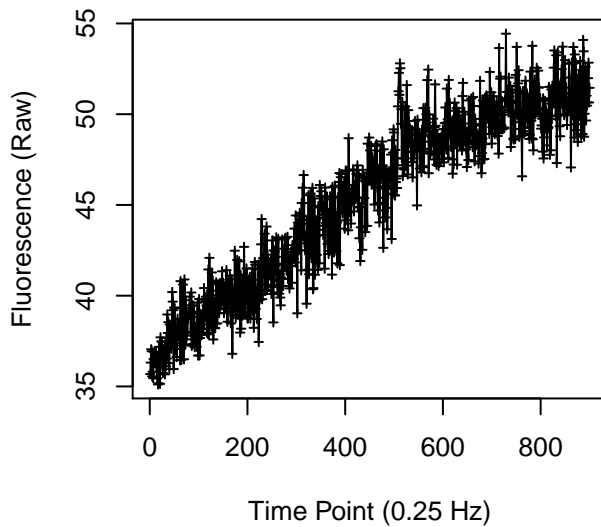

**Cell 467**

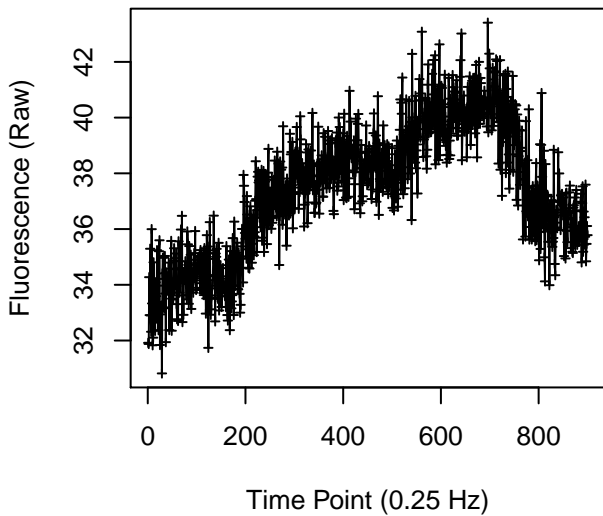

**Cell 468**

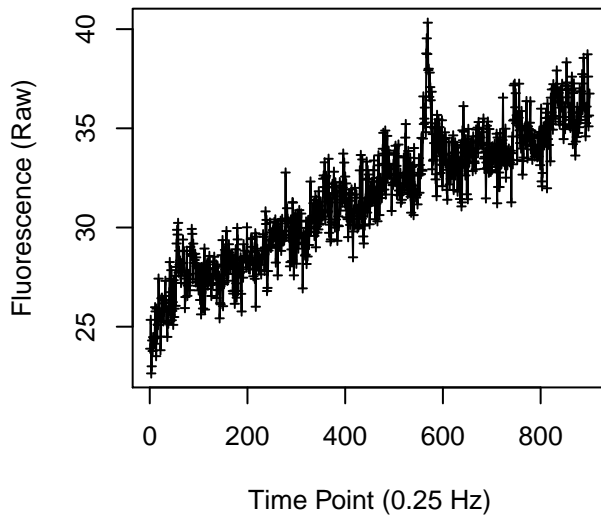

**Cell 469**

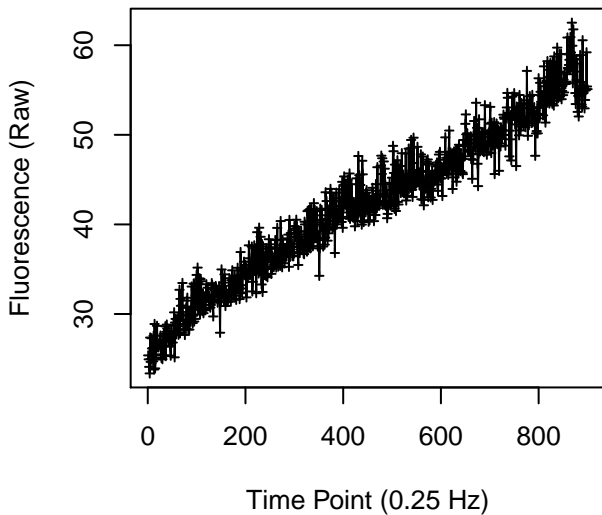

**Cell 470**

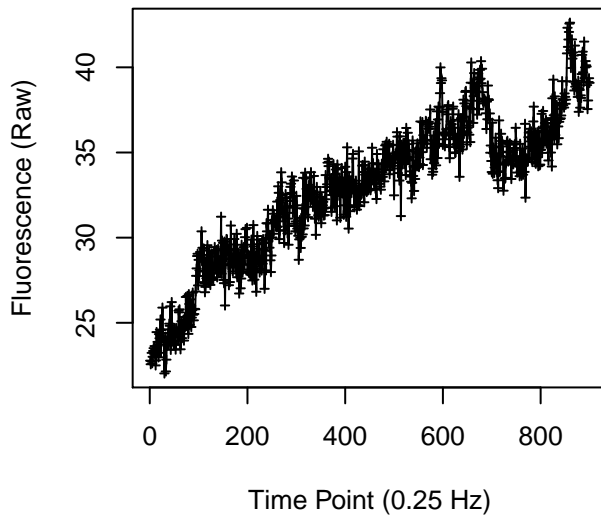

**Cell 471**

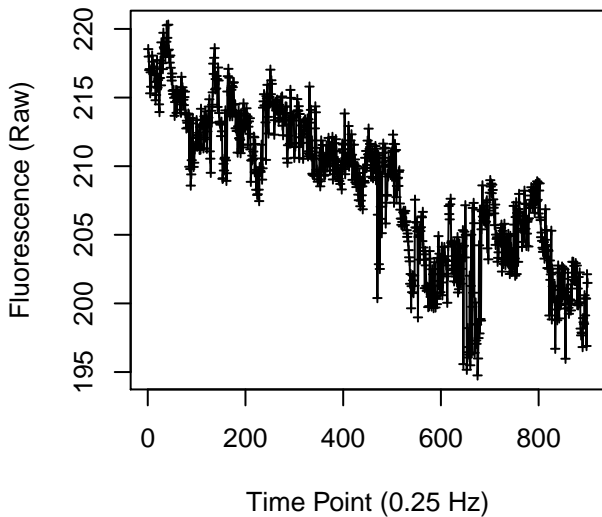

**Cell 472**

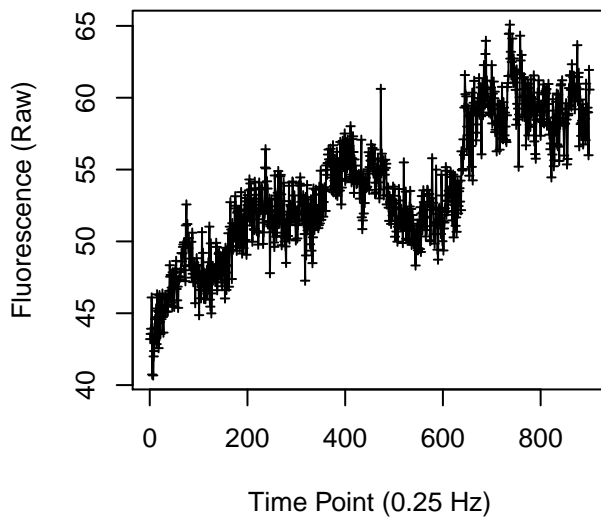

**Cell 473**

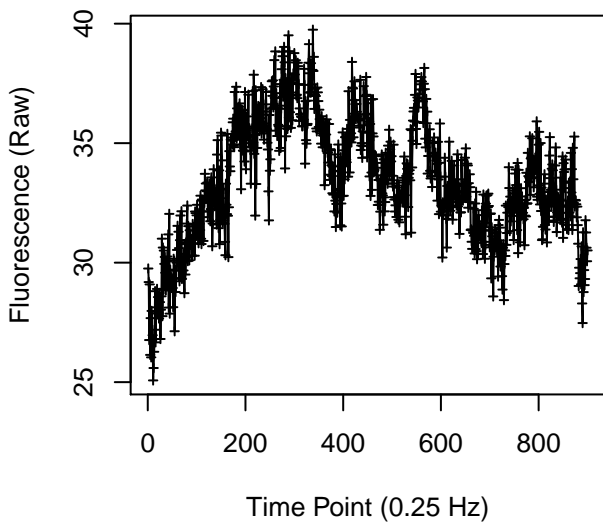

**Cell 474**

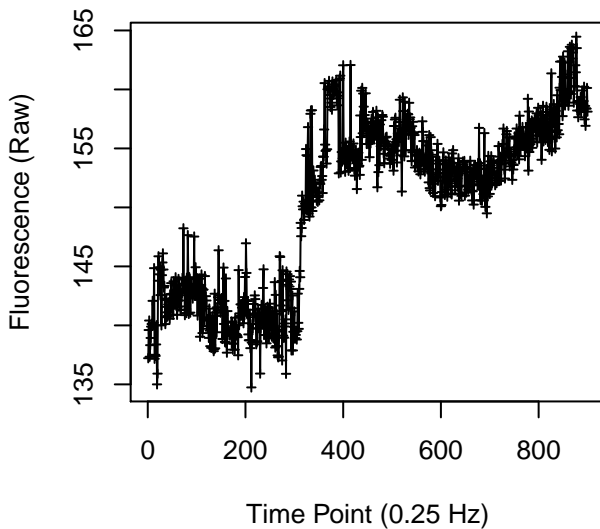

**Cell 475**

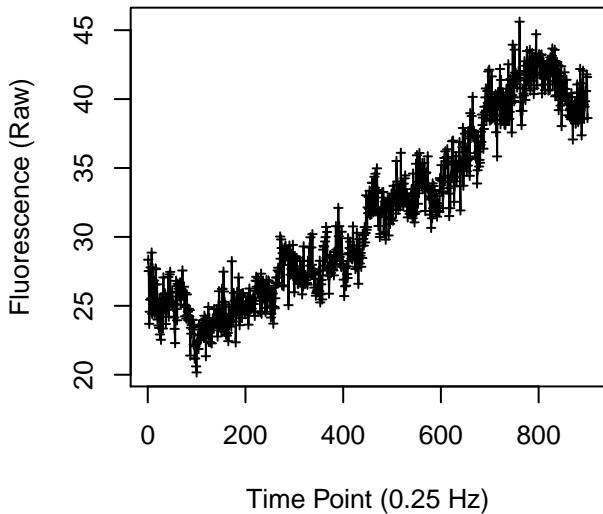

**Cell 476**

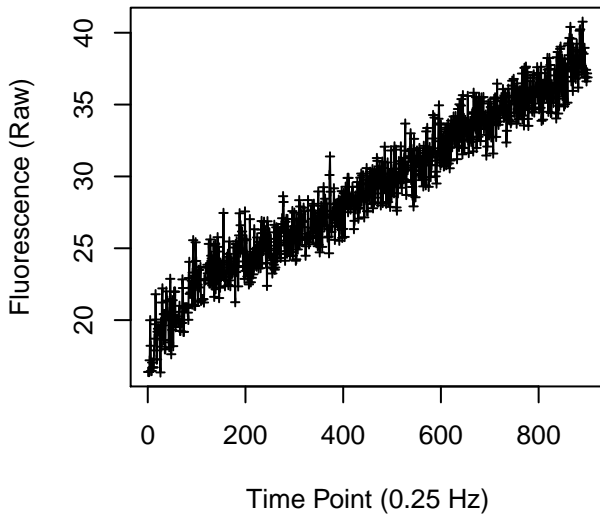

**Cell 477**

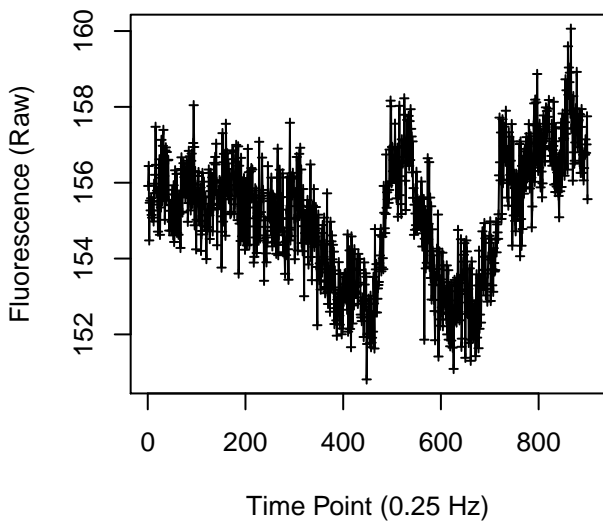

**Cell 478**

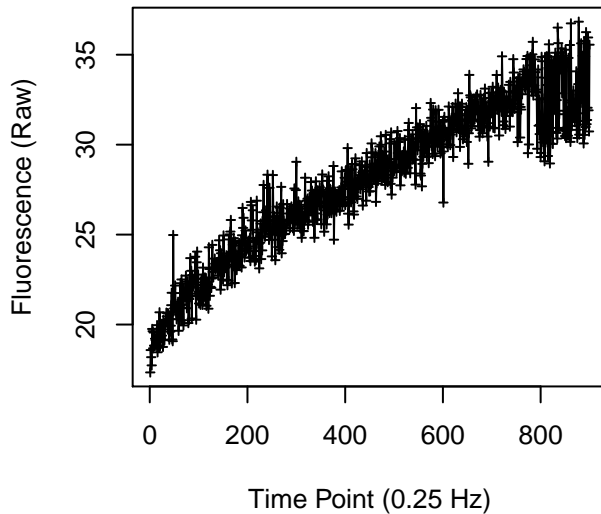

**Cell 479**

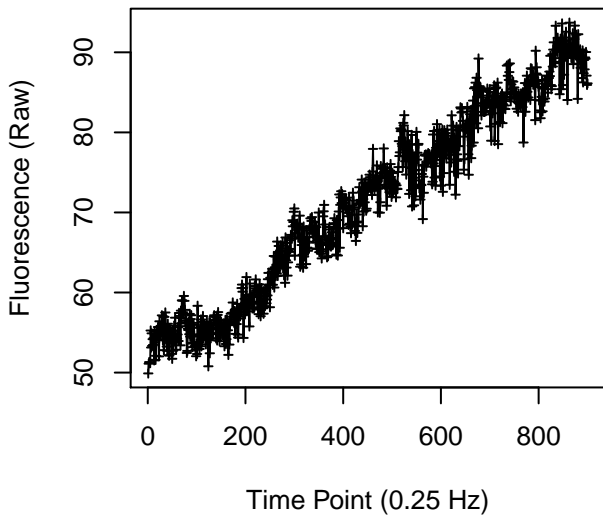

**Cell 480**

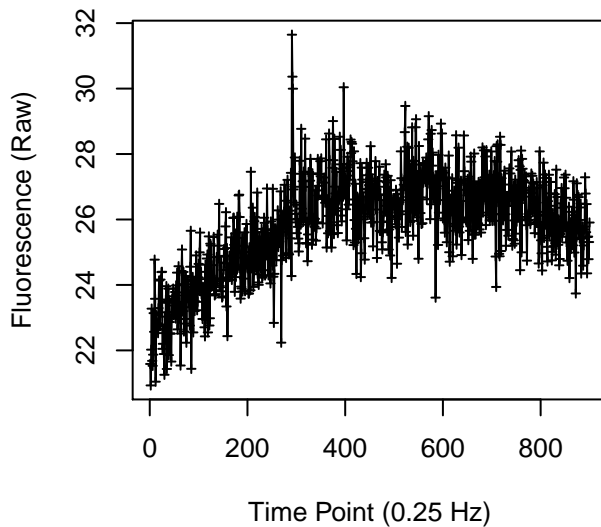

**Cell 481**

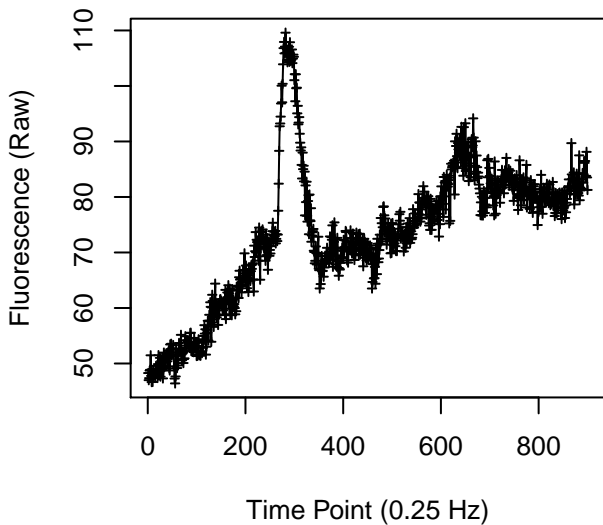

**Cell 482**

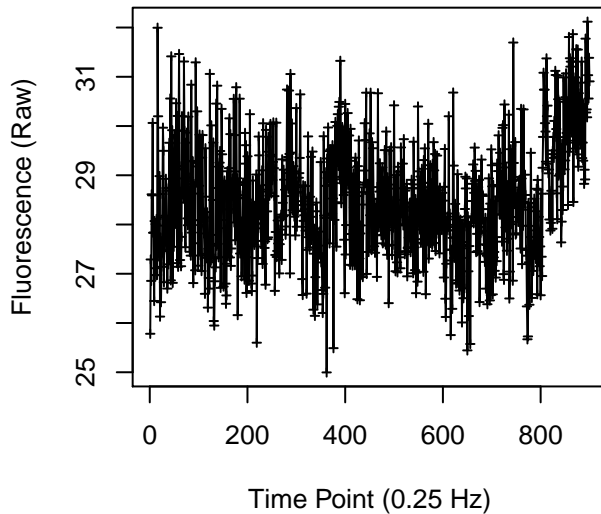

**Cell 483**

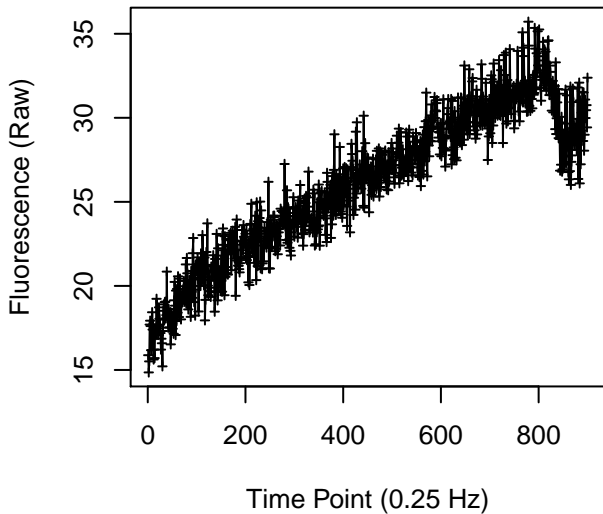

**Cell 484**

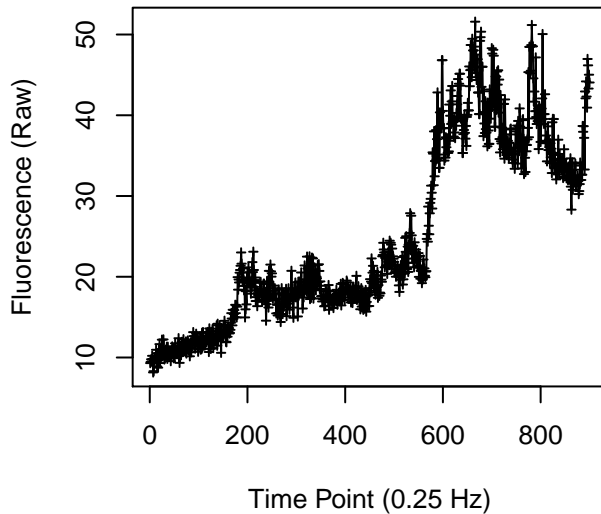

**Cell 485**

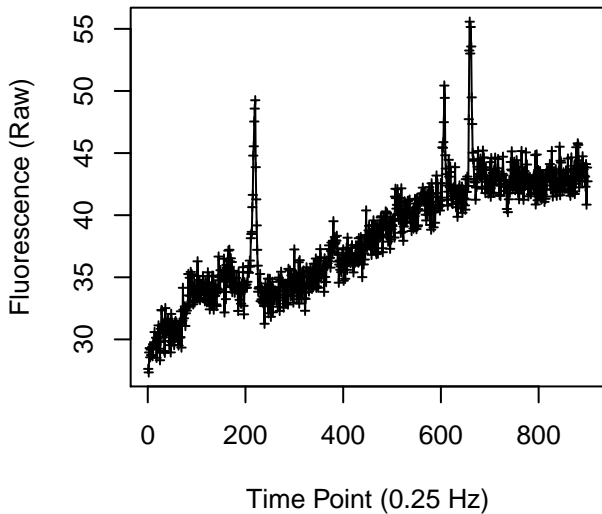

**Cell 486**

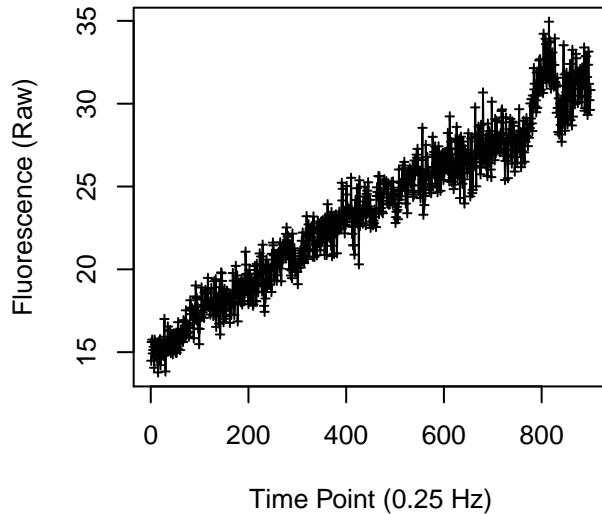

**Cell 487**

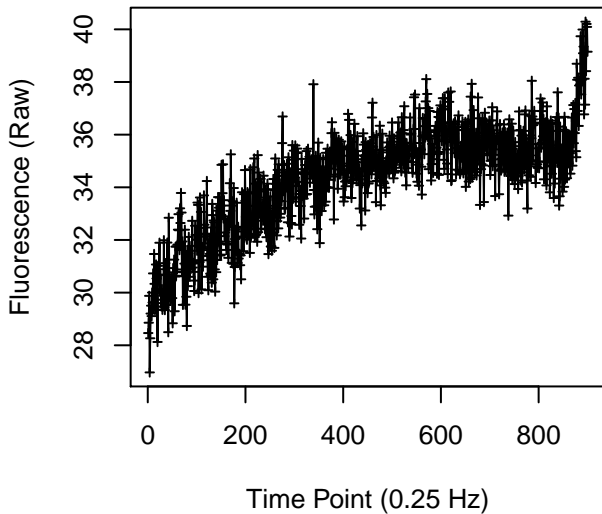

**Cell 488**

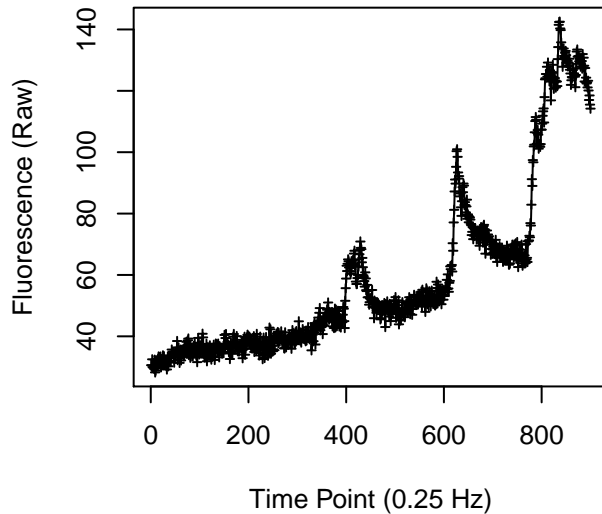



**Cell 489**

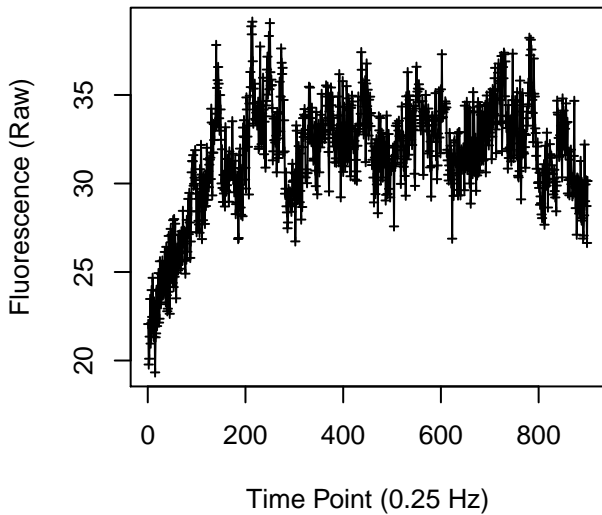

**Cell 490**

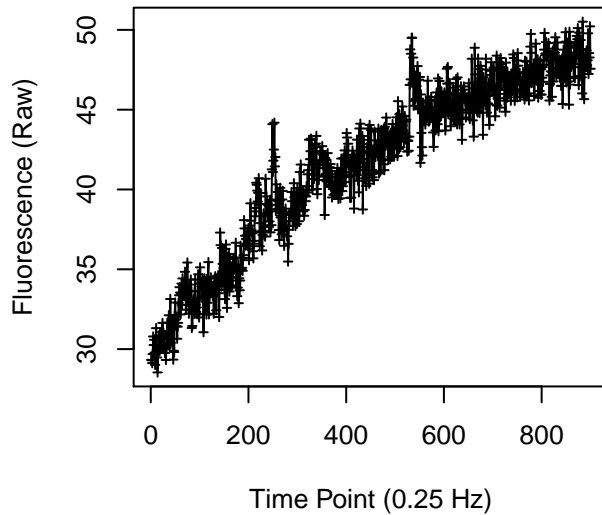

**Cell 491**

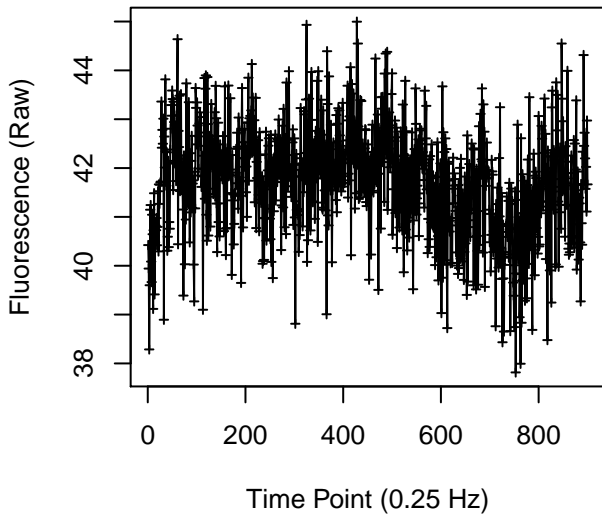

**Cell 492**

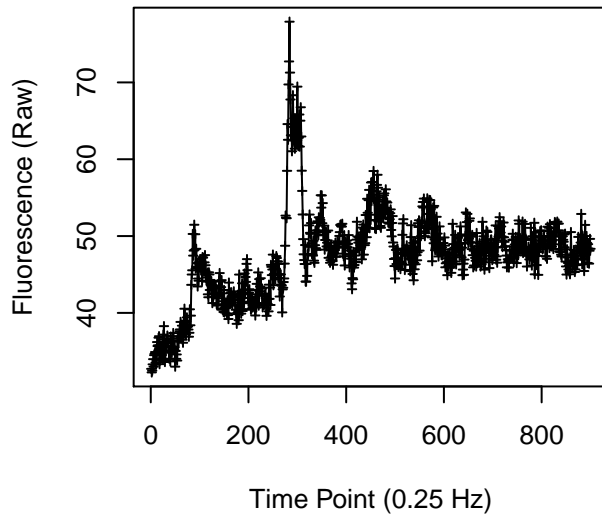

**Cell 493**

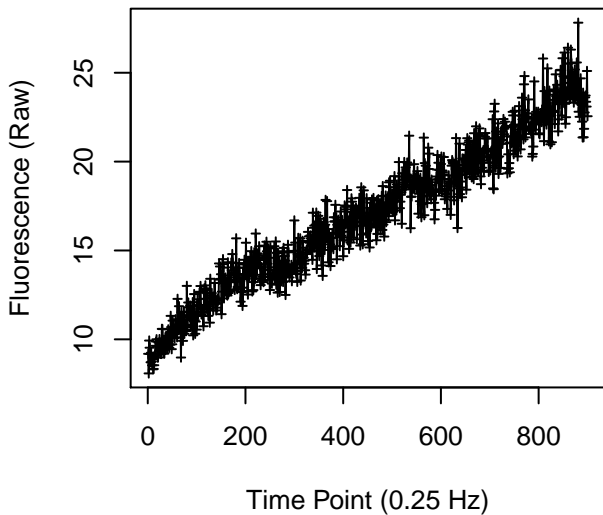

**Cell 494**

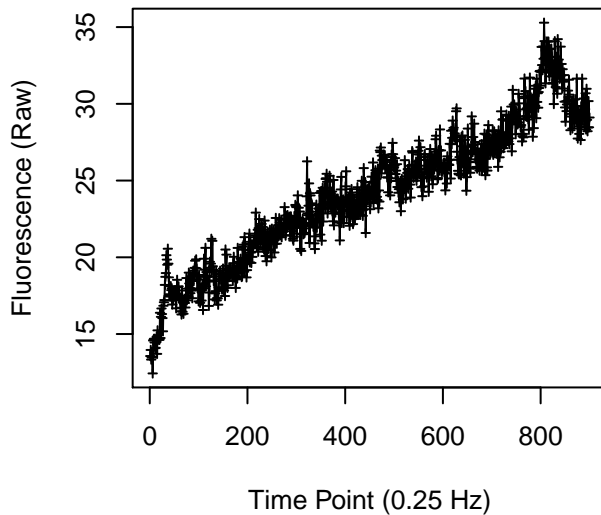

**Cell 495**

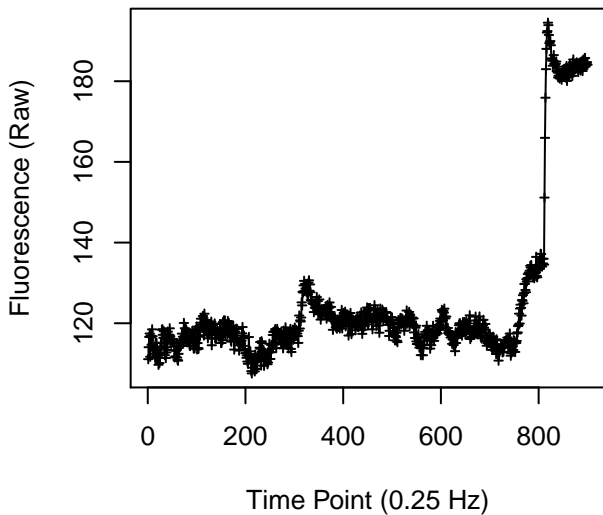

**Cell 496**

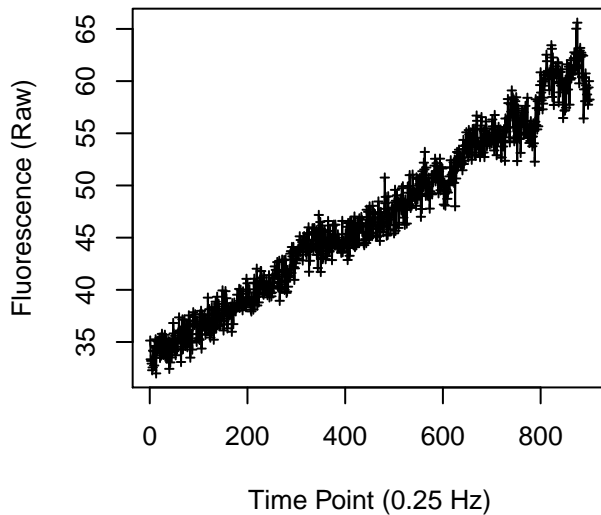

**Cell 497**

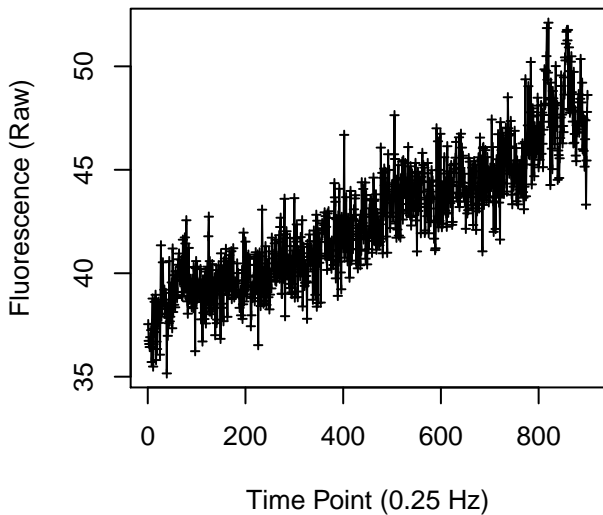

**Cell 498**

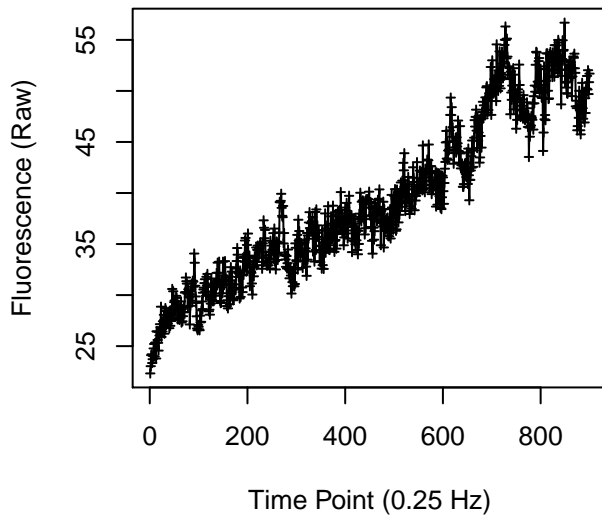

**Cell 499**

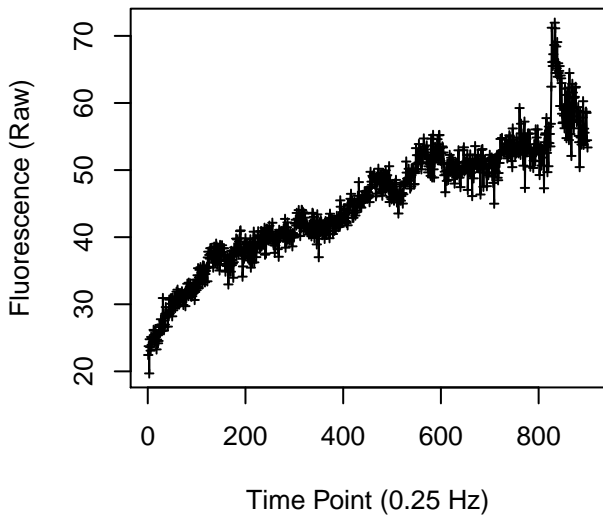

**Cell 500**

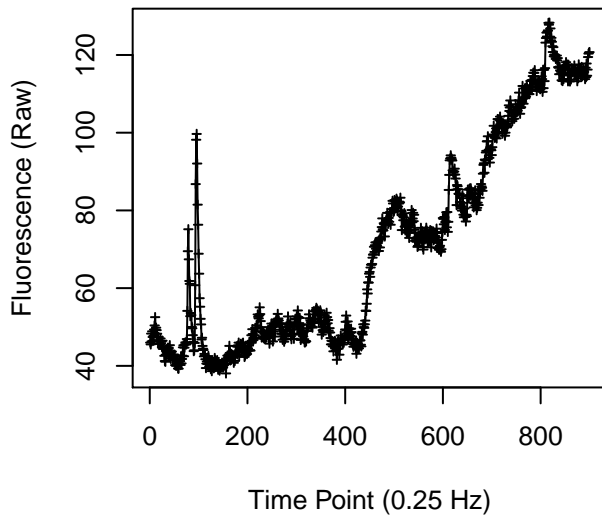

**Cell 501**

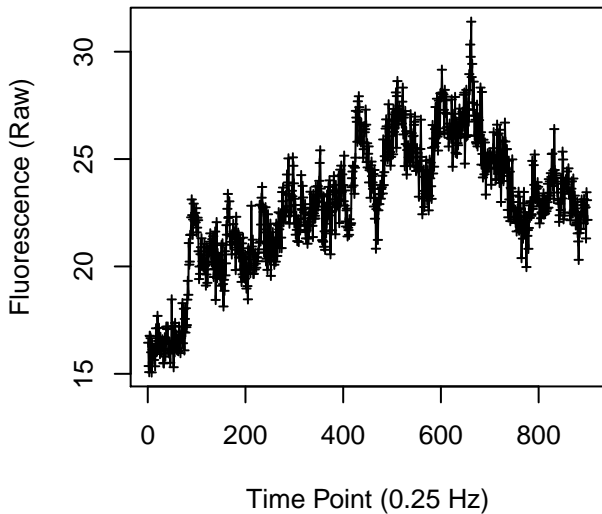

**Cell 502**

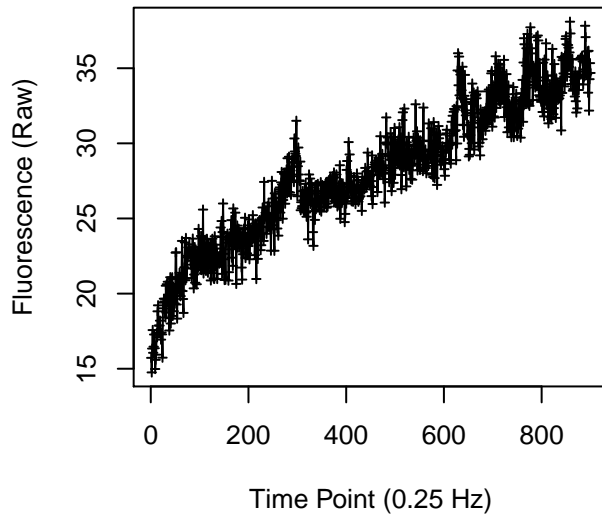

**Cell 503**

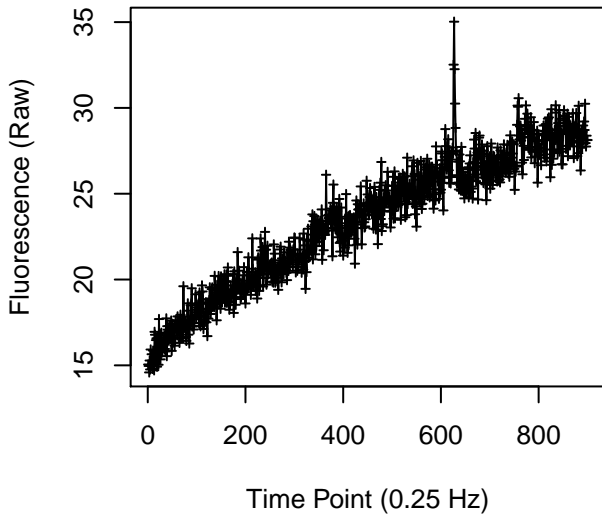

**Cell 504**

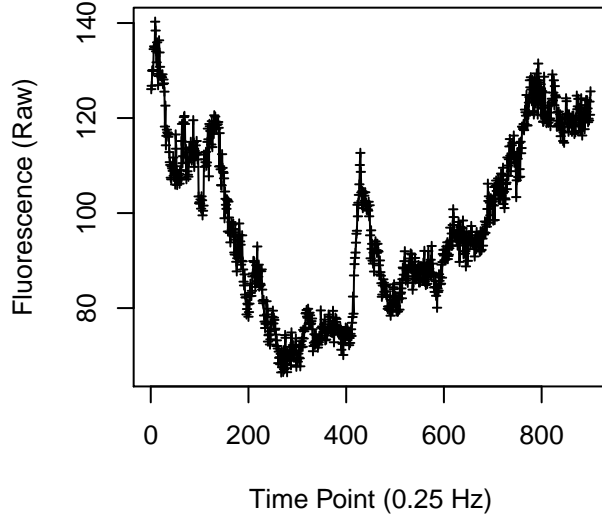

**Cell 505**

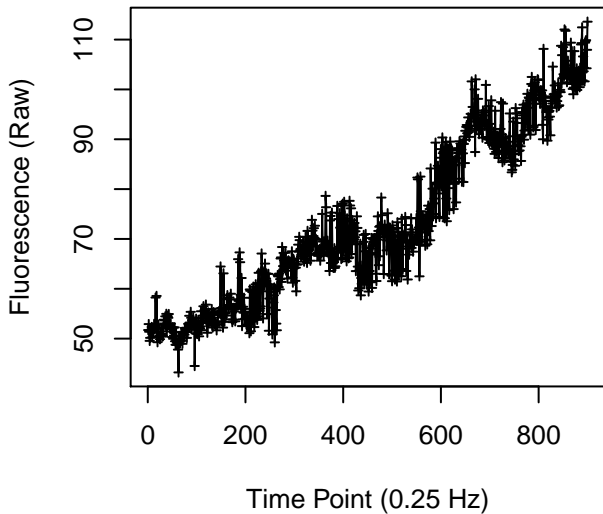

**Cell 506**

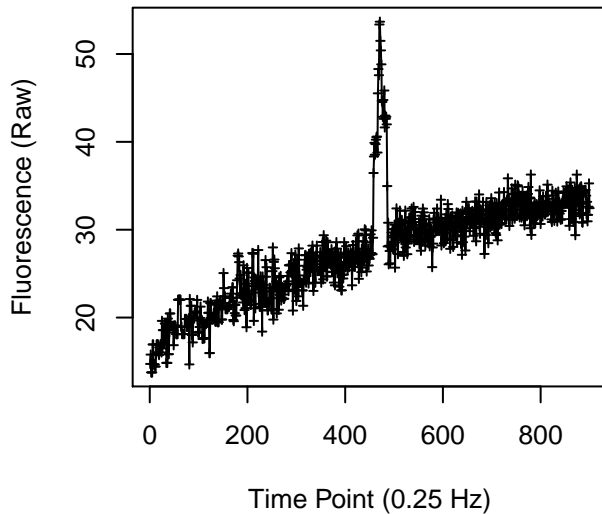

**Cell 507**

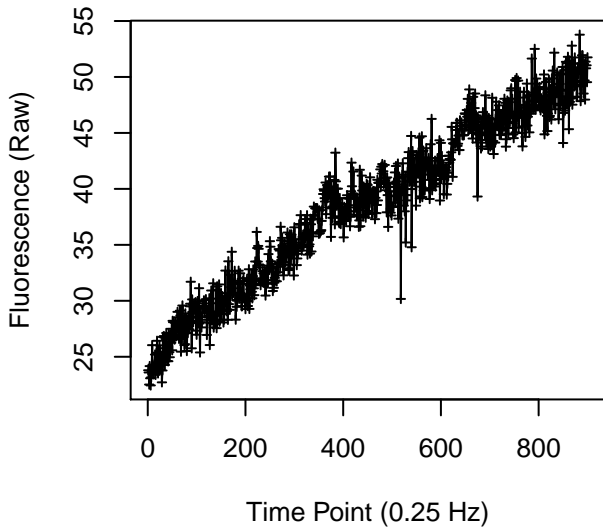

**Cell 508**

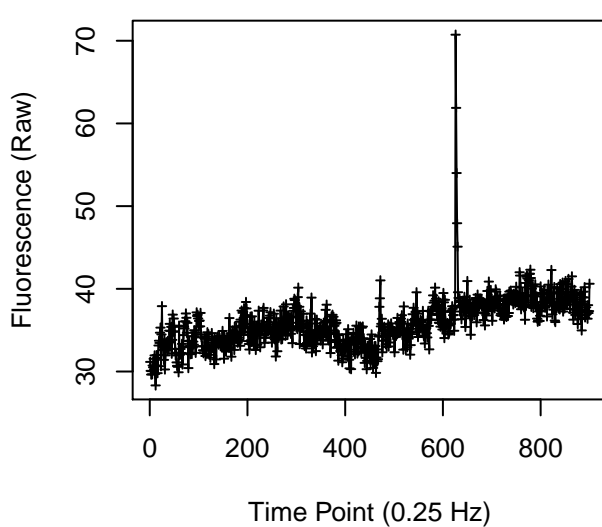

**Cell 509**

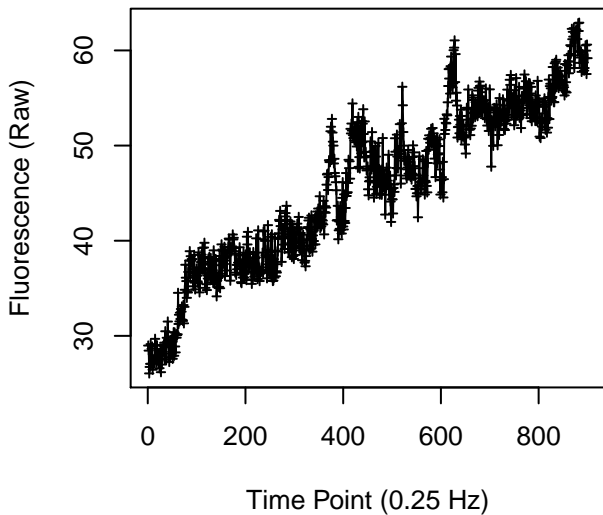

**Cell 510**

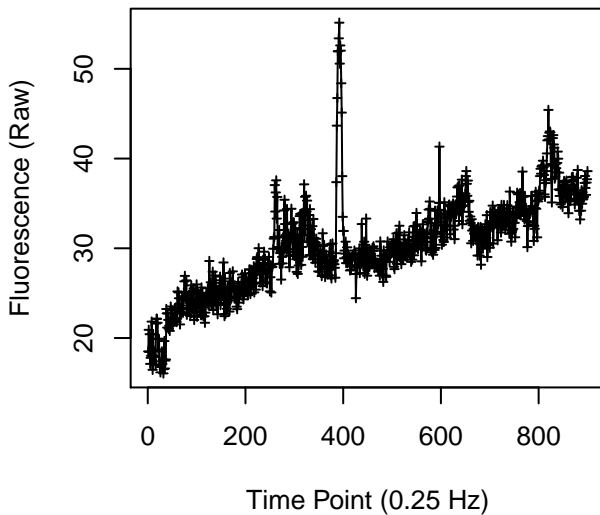

**Cell 511**

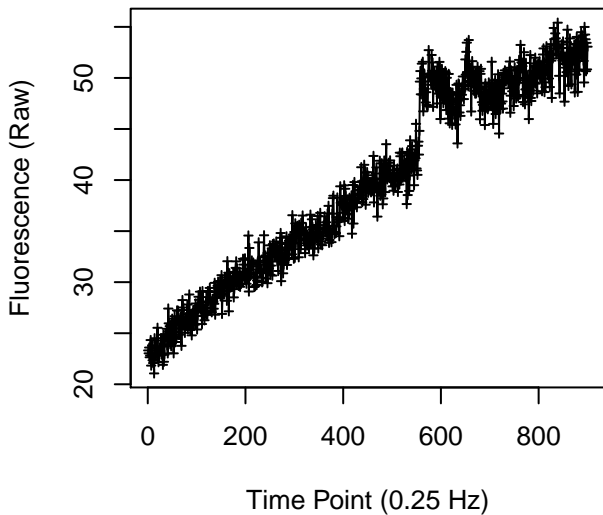

**Cell 512**

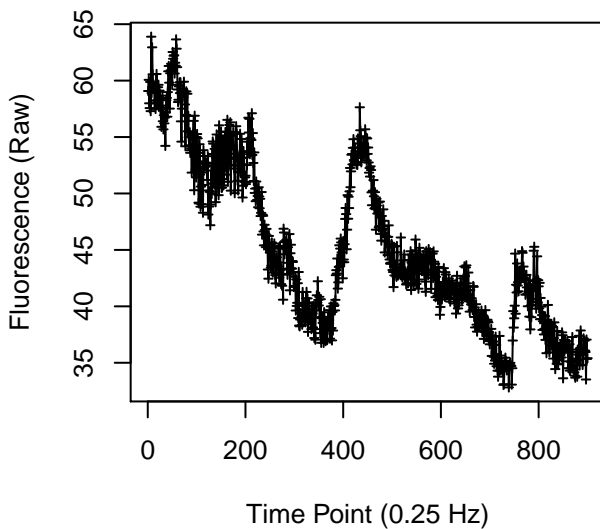

**Cell 513**

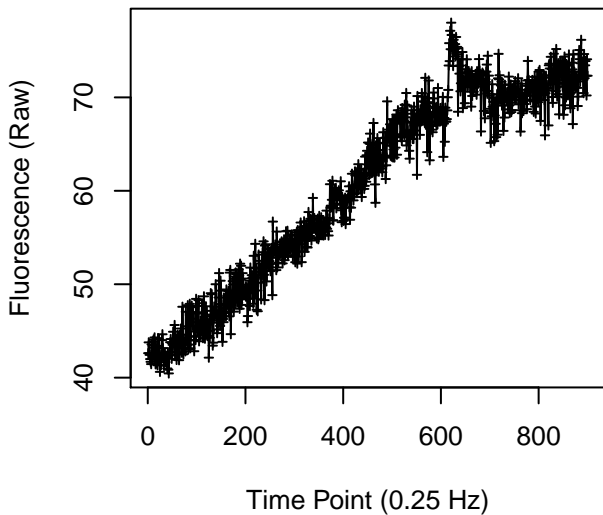

**Cell 514**

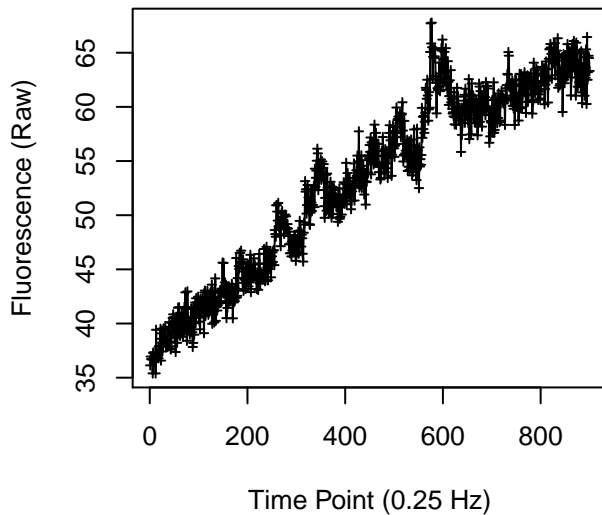

**Cell 515**

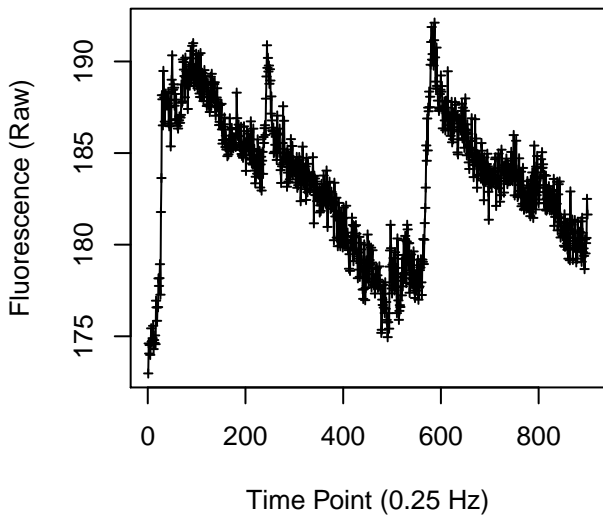

**Cell 516**

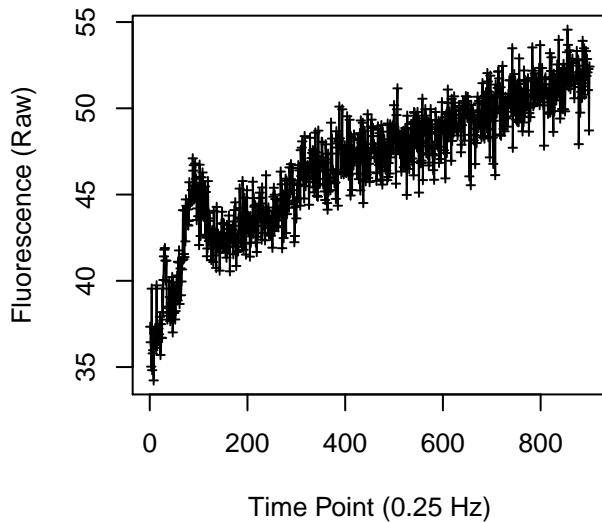

**Cell 517**

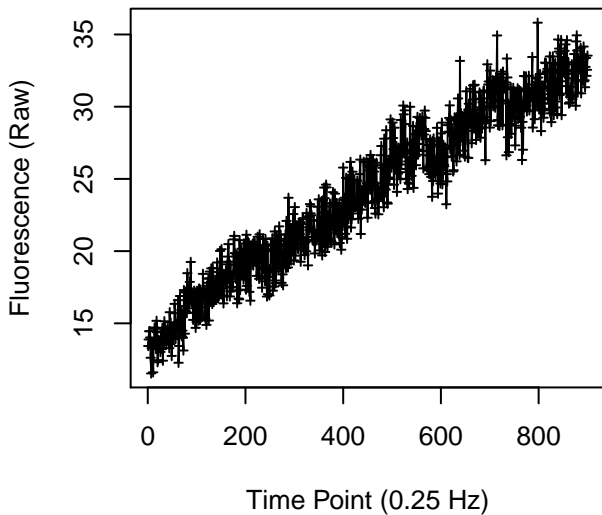

**Cell 518**

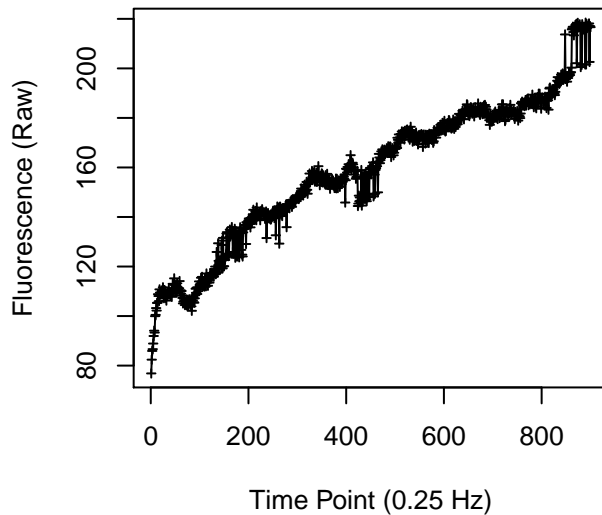

**Cell 519**

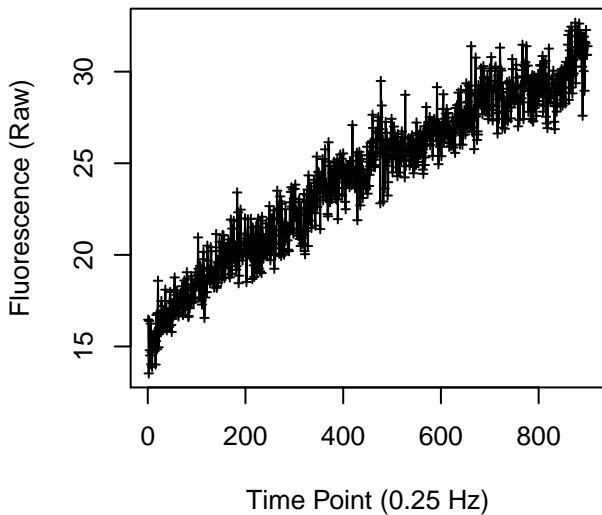

**Cell 520**

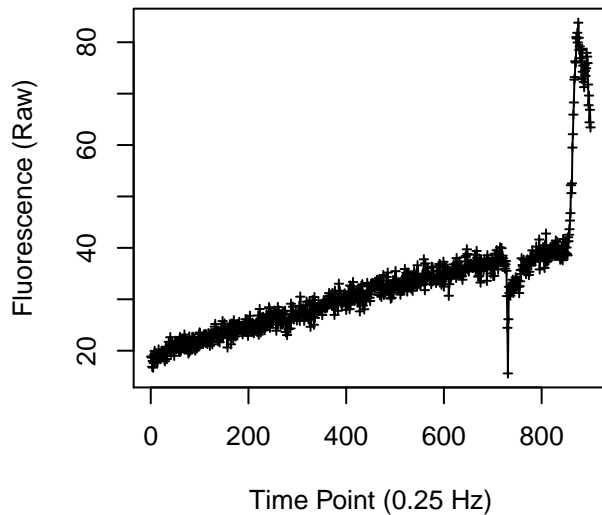



**Cell 521**

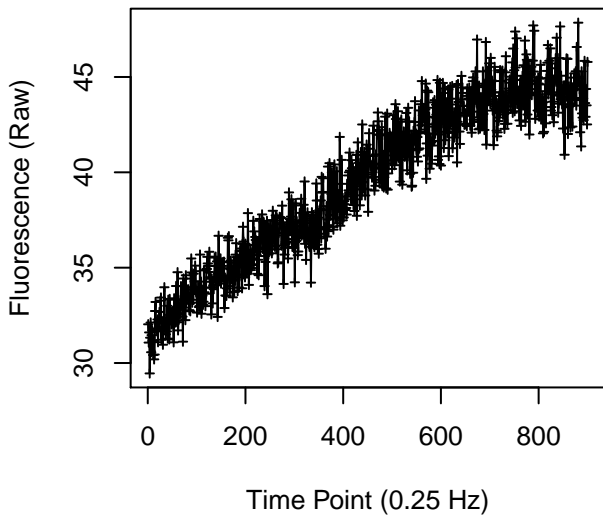

**Cell 522**

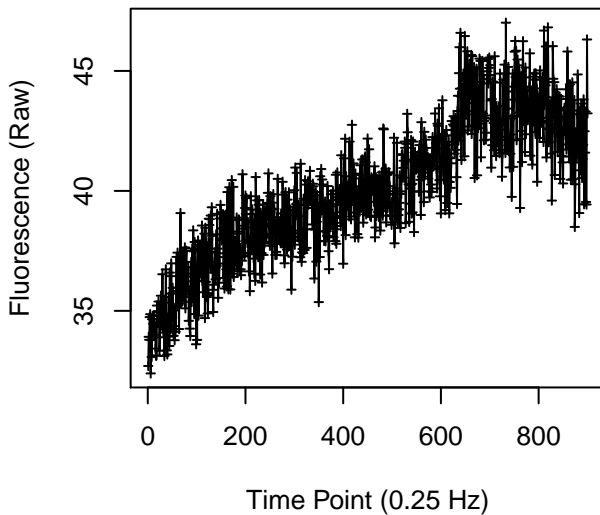

**Cell 523**

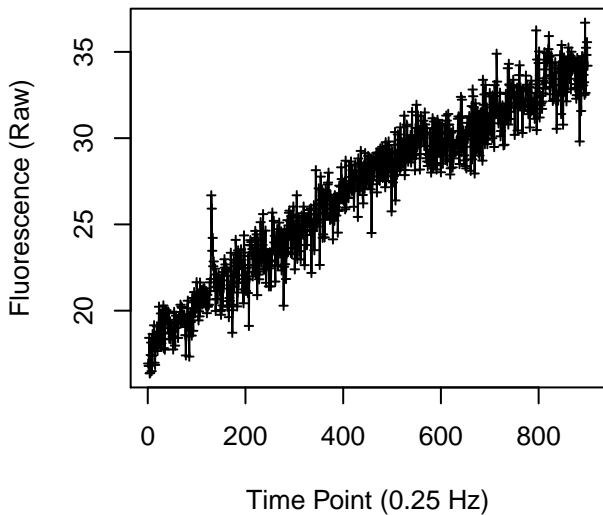

**Cell 524**

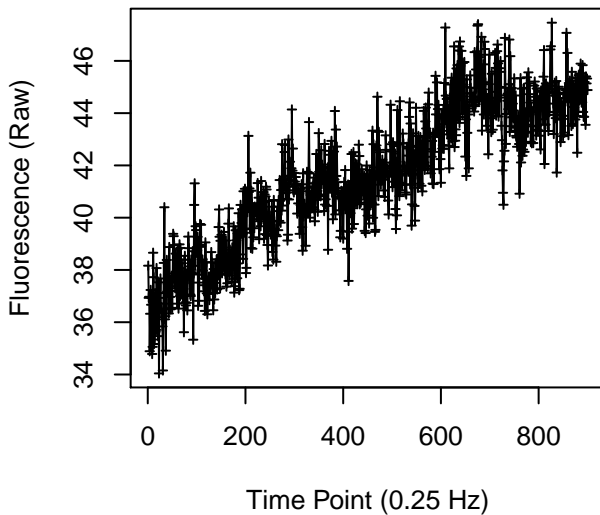

**Cell 525**

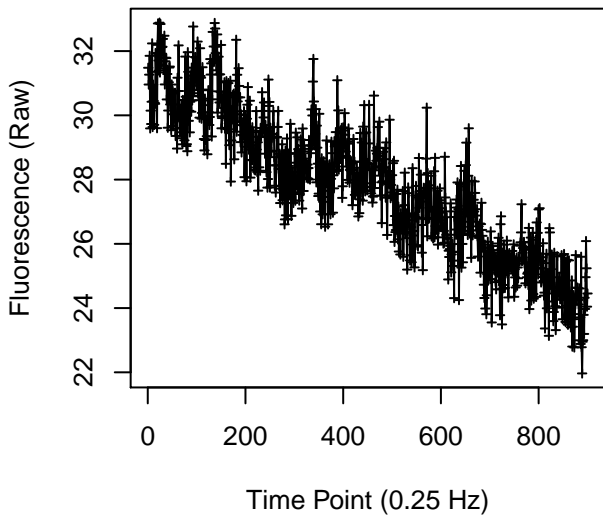

**Cell 526**

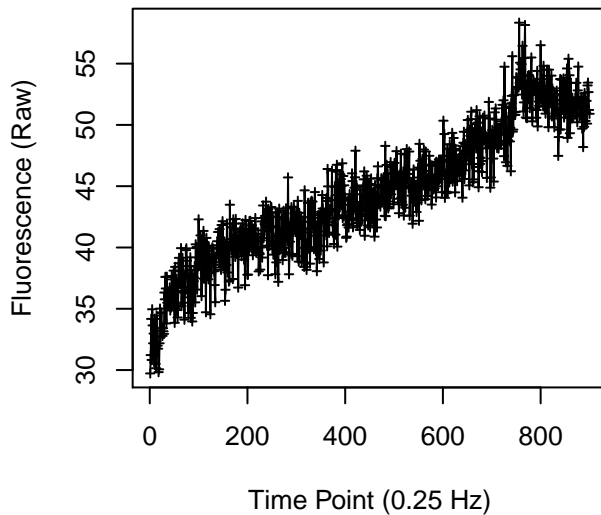

**Cell 527**

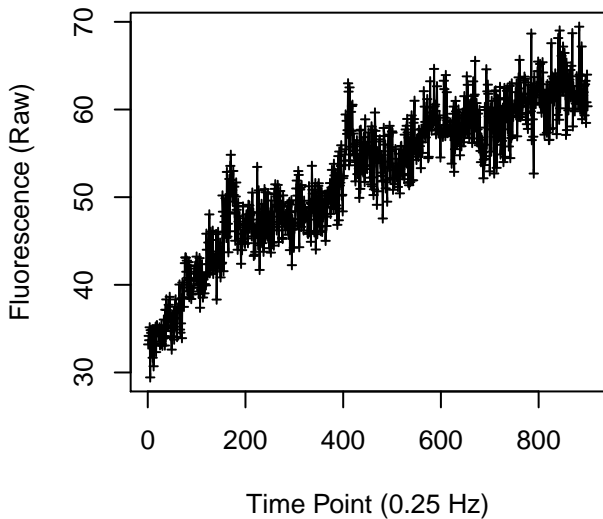

**Cell 528**

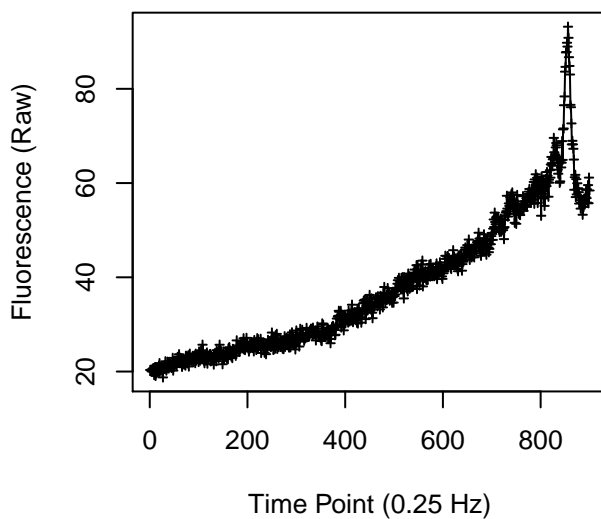

**Cell 529**

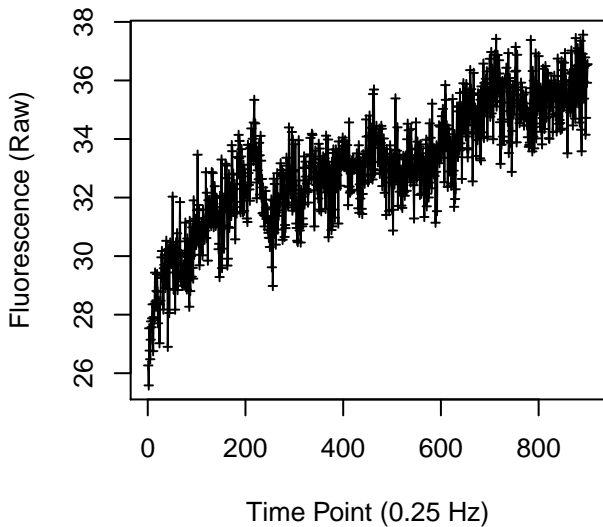

**Cell 530**

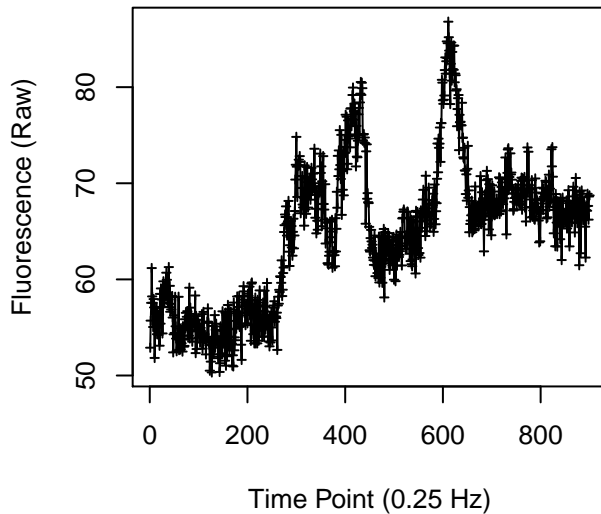

**Cell 531**

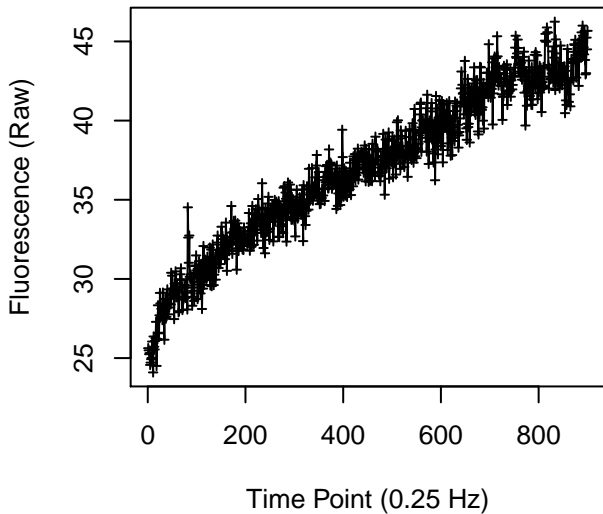

**Cell 532**

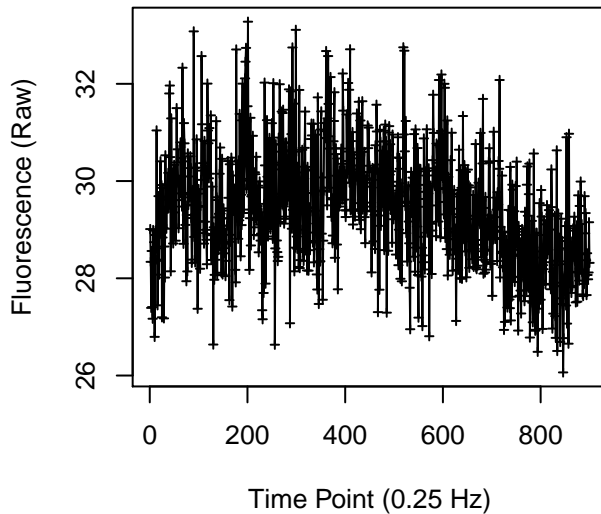

**Cell 533**

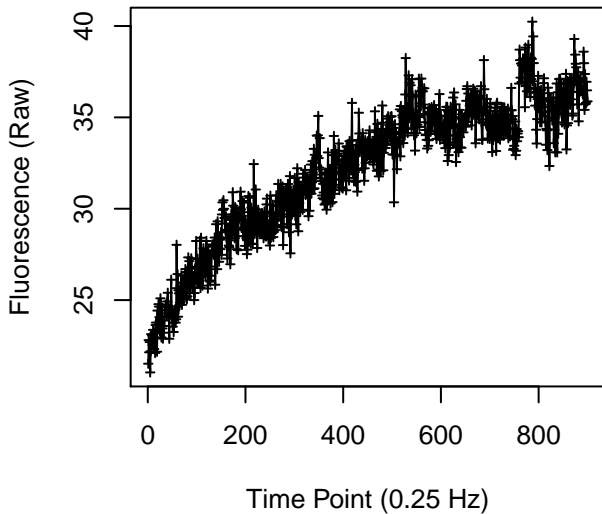

**Cell 534**

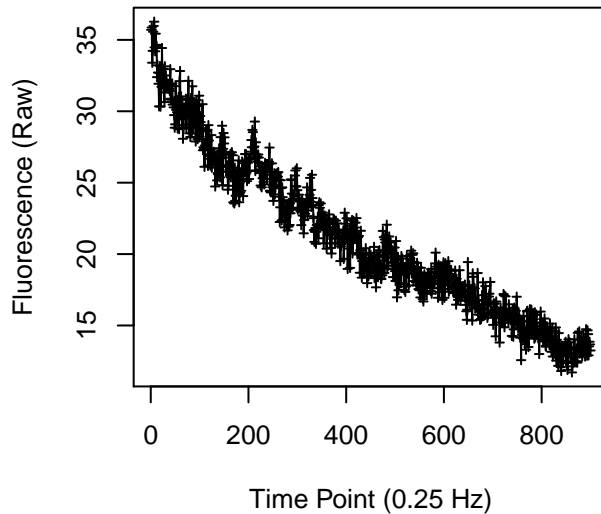

**Cell 535**

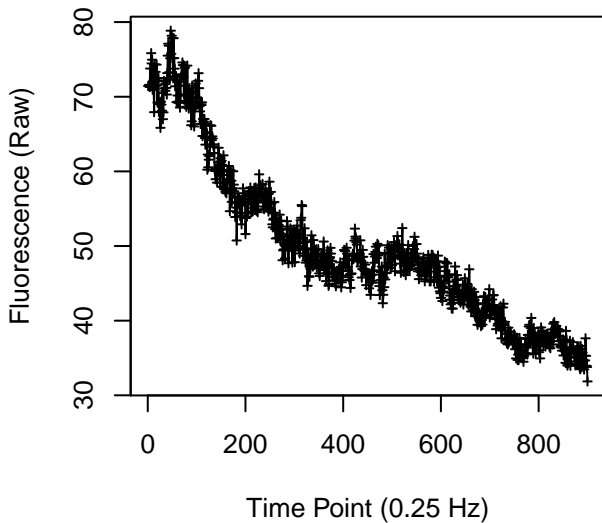

**Cell 536**

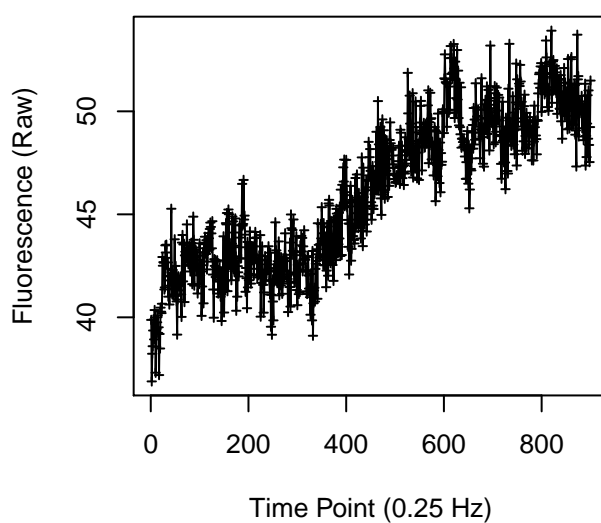

**Cell 537**

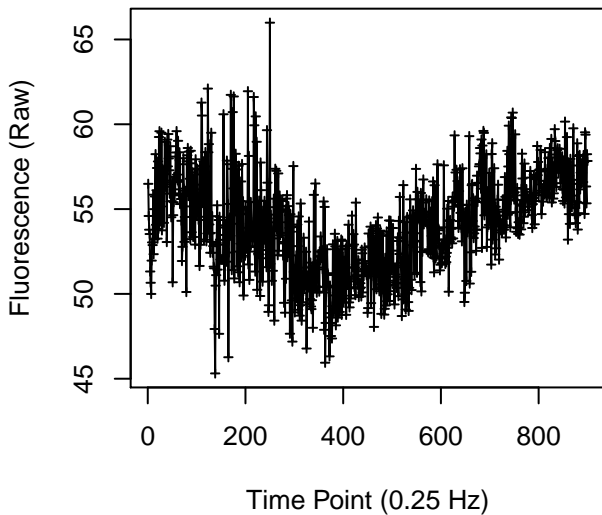

**Cell 538**

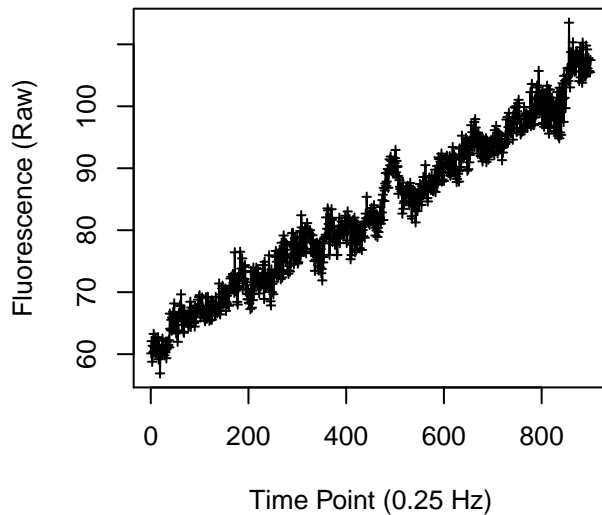

**Cell 539**

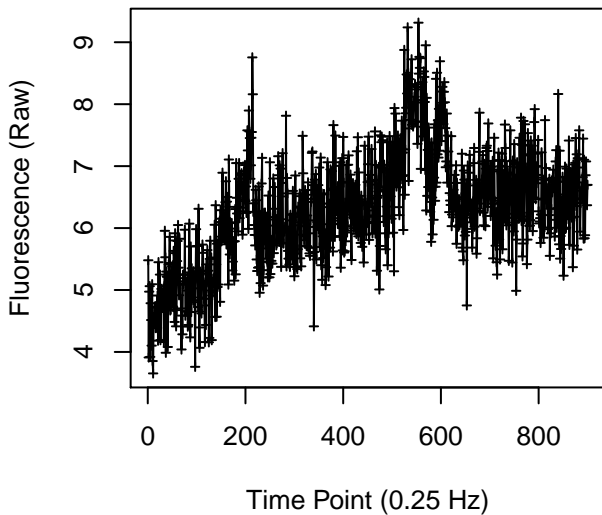

**Cell 540**

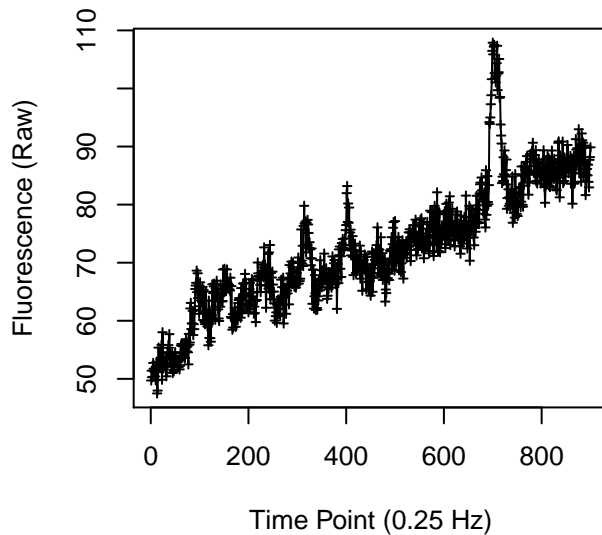

**Cell 541**

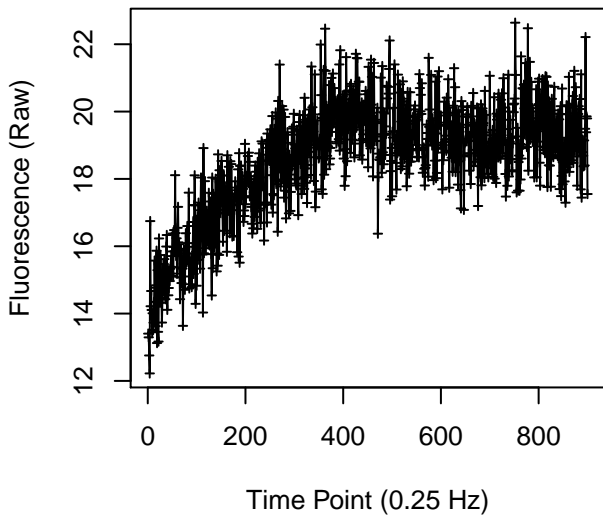

**Cell 542**

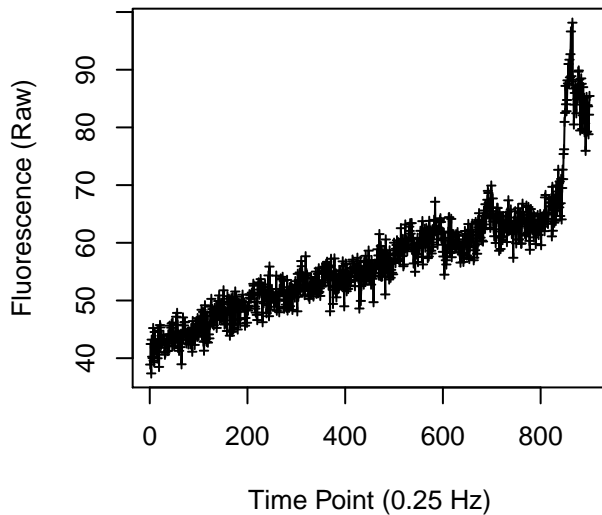

**Cell 543**

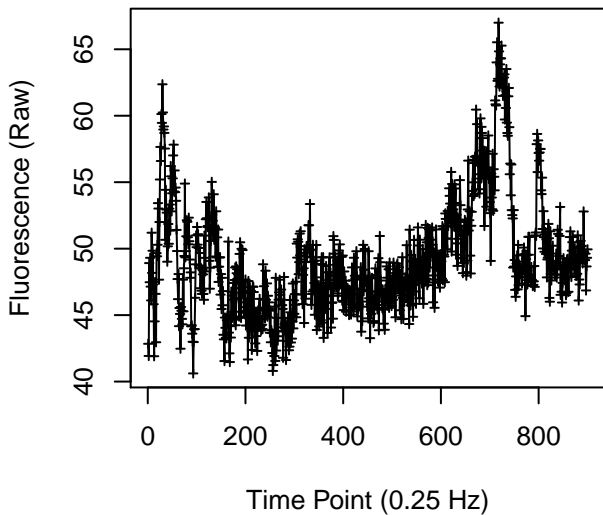

**Cell 544**

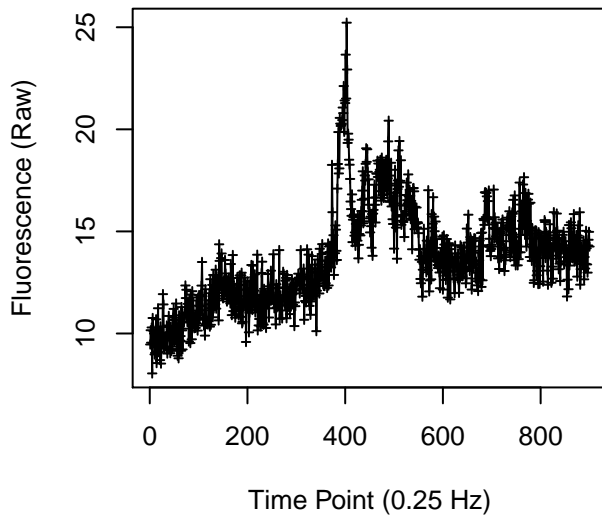

**Cell 545**

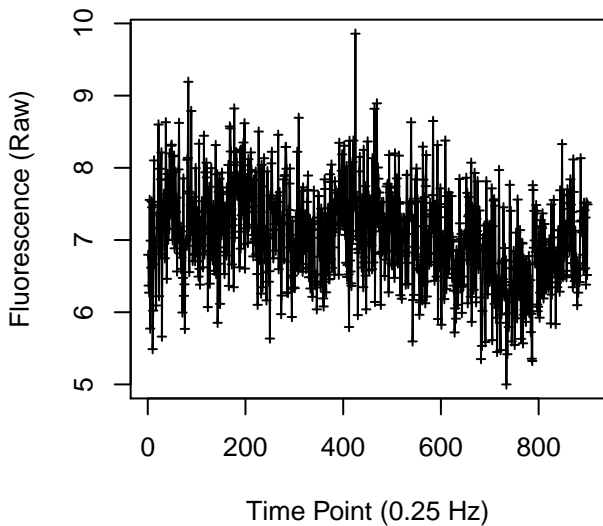

**Cell 546**

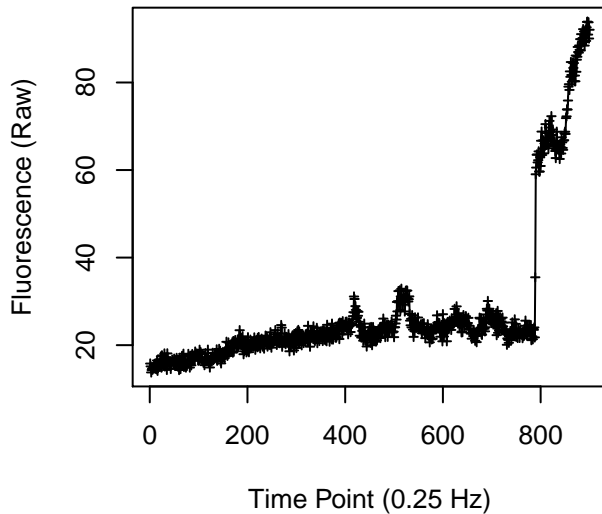

**Cell 547**

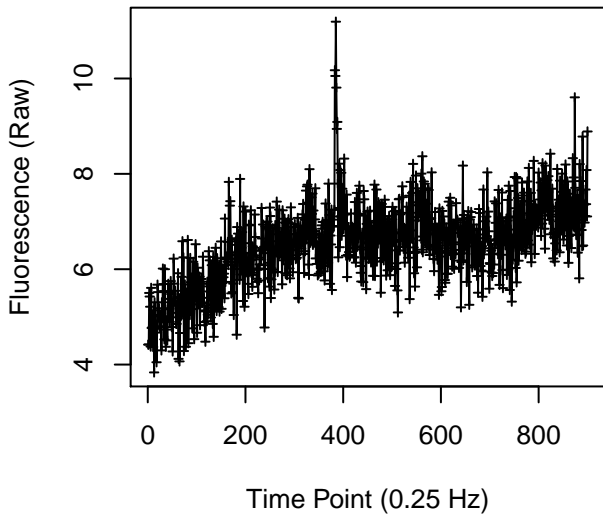

**Cell 548**

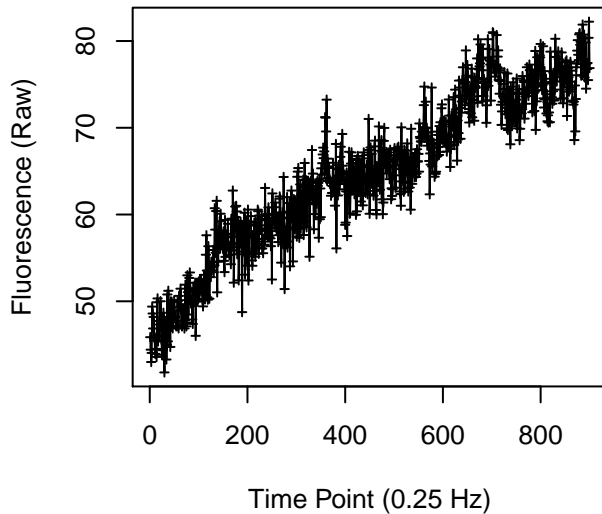

**Cell 549**

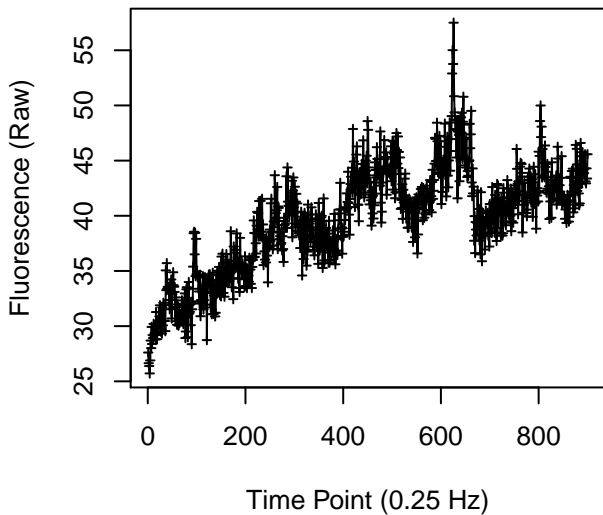

**Cell 550**

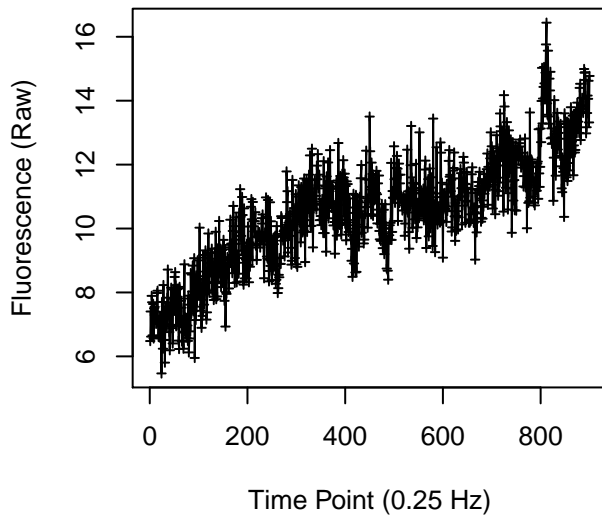

**Cell 551**

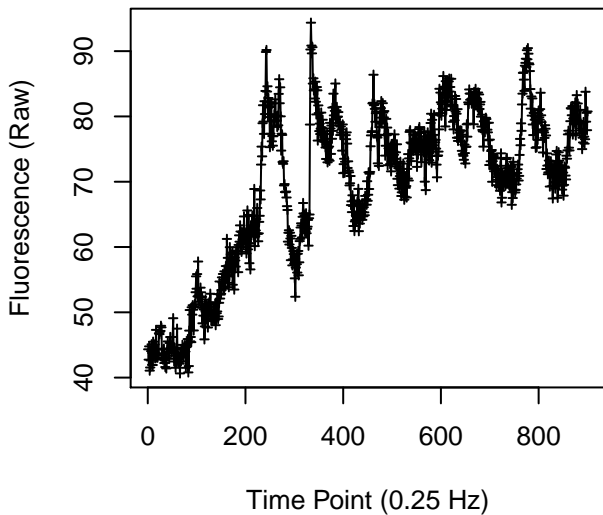

**Cell 552**

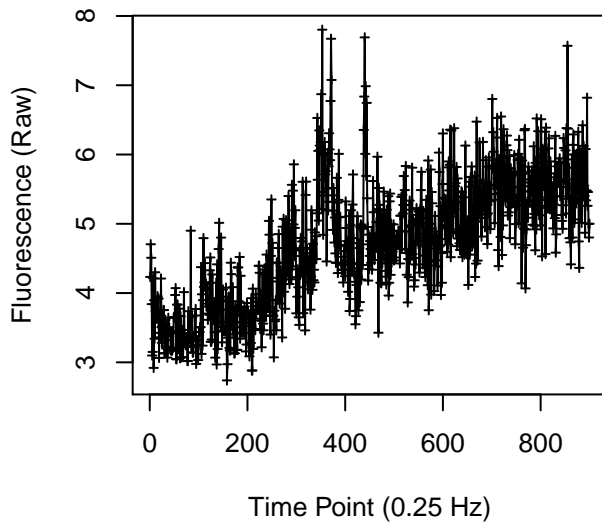



**Cell 553**

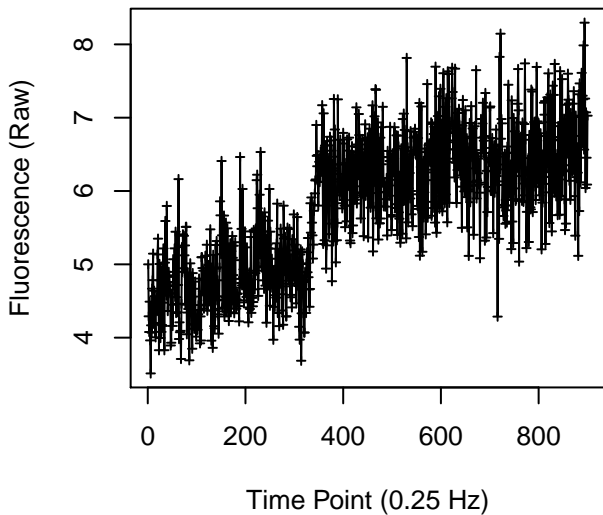

**Cell 554**

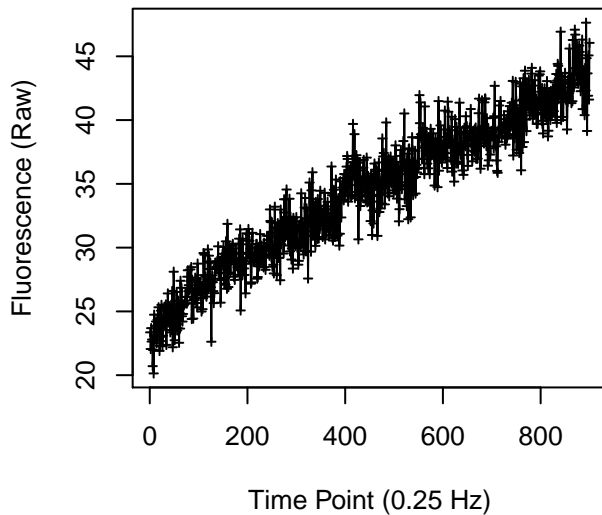

**Cell 555**

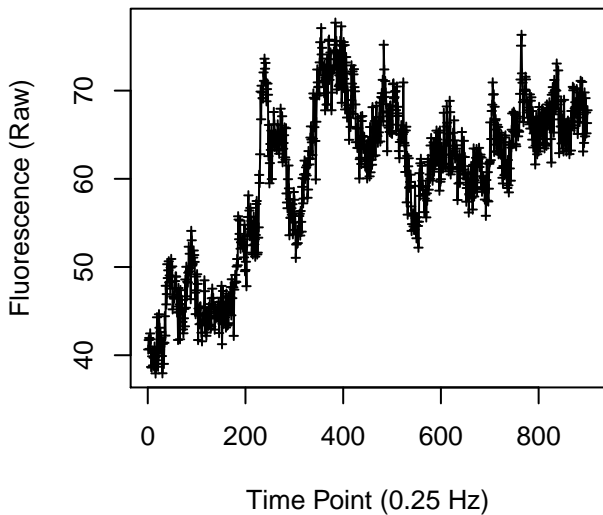

**Cell 556**

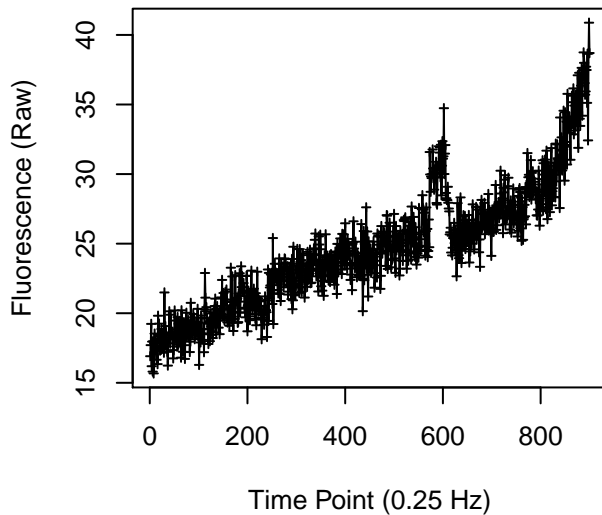

**Cell 557**

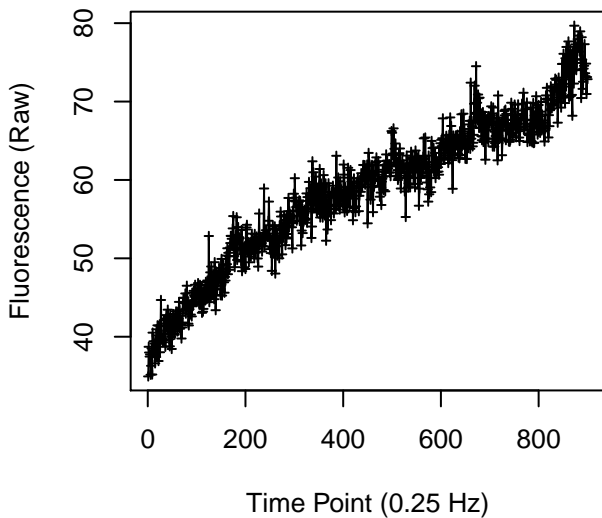

**Cell 558**

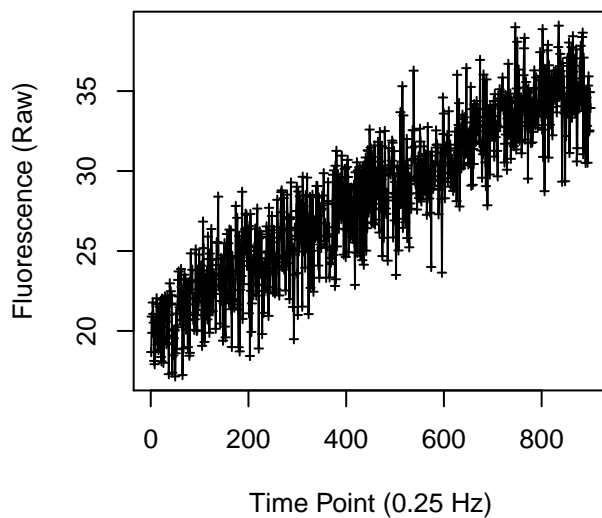

**Cell 559**

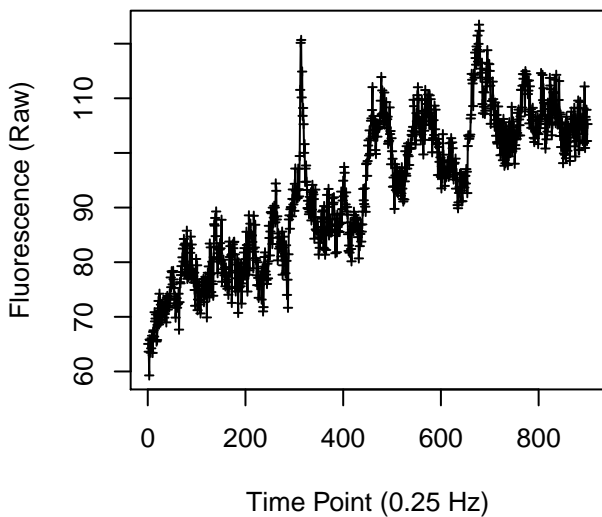

**Cell 560**

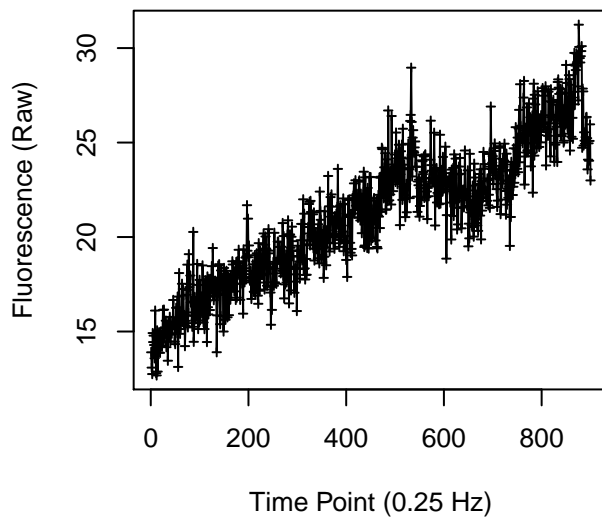

**Cell 561**

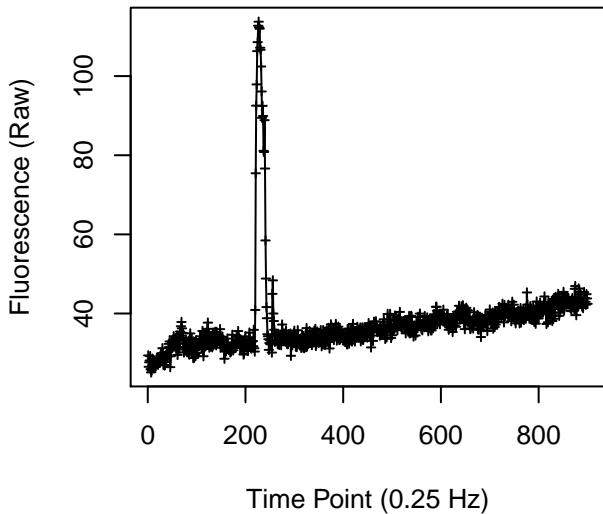

**Cell 562**

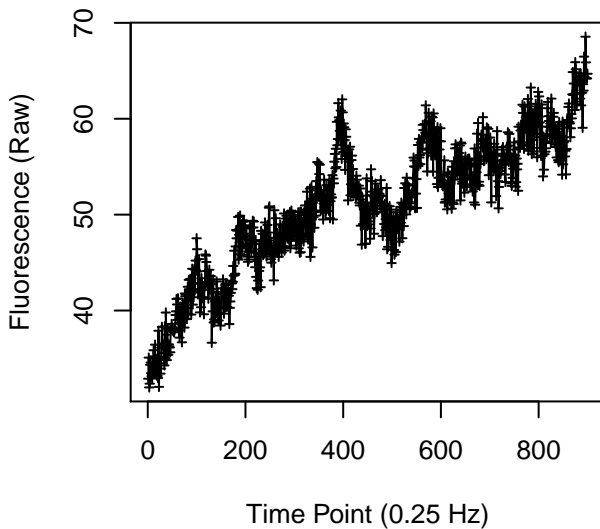

**Cell 563**

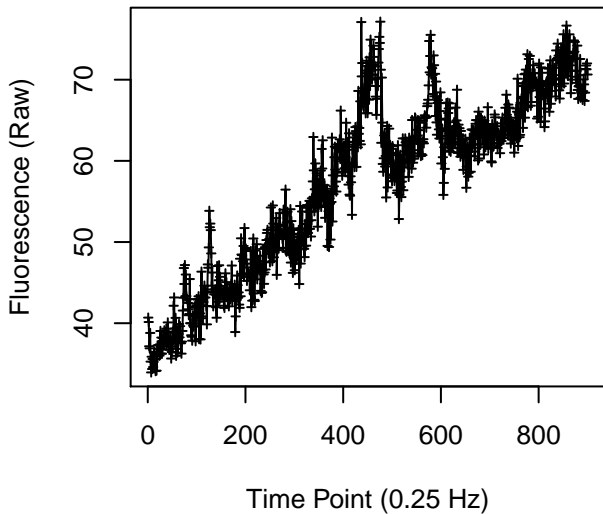

**Cell 564**

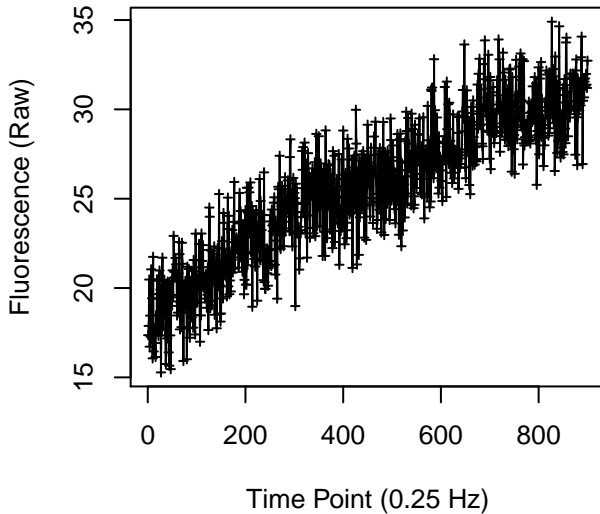

**Cell 565**

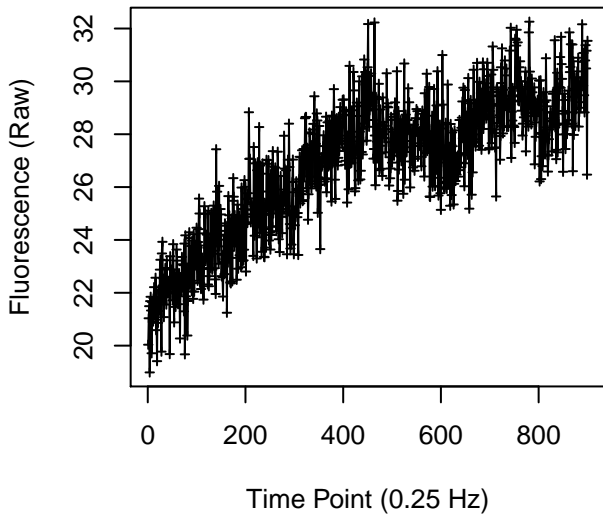

**Cell 566**

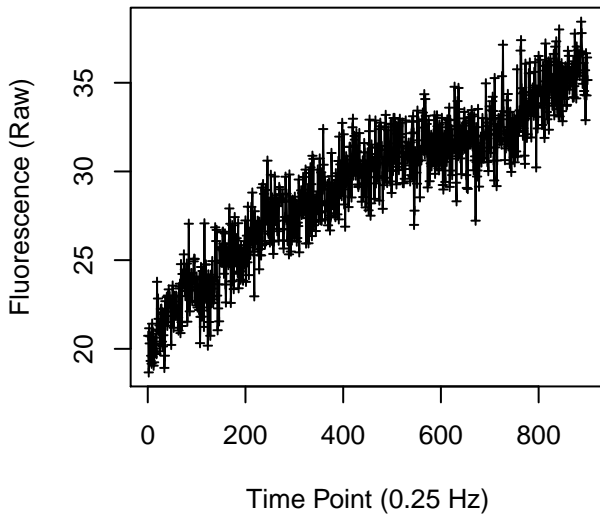

**Cell 567**

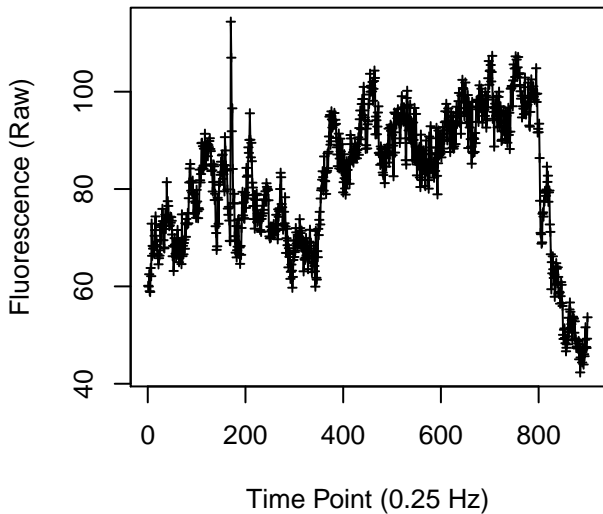

**Cell 568**

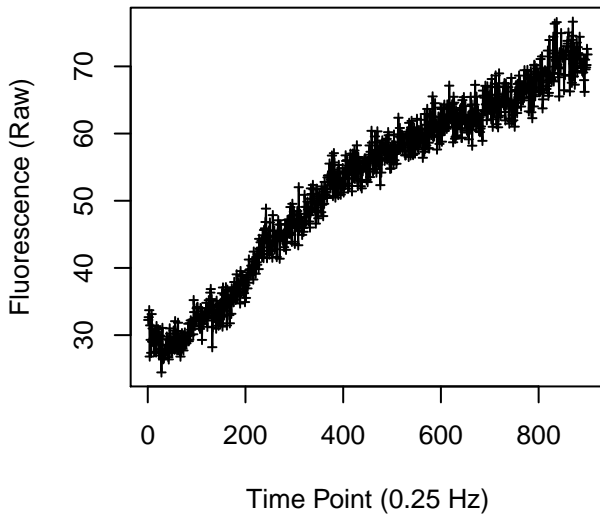

**Cell 569**

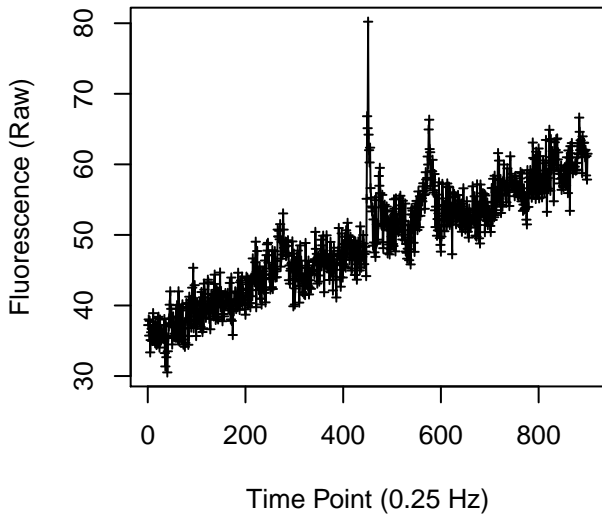

**Cell 570**

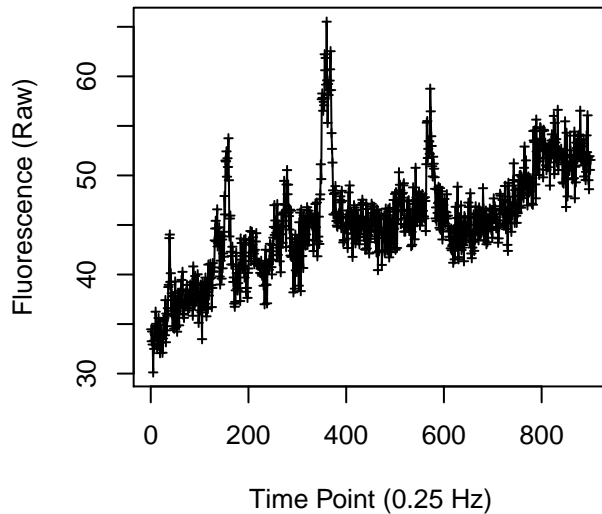

**Cell 571**

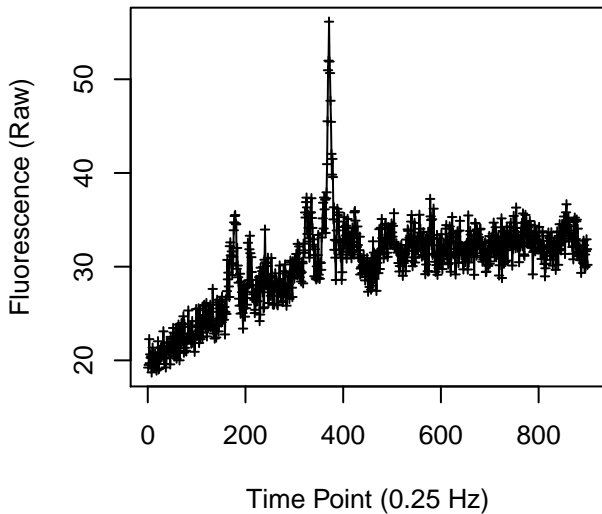

**Cell 572**

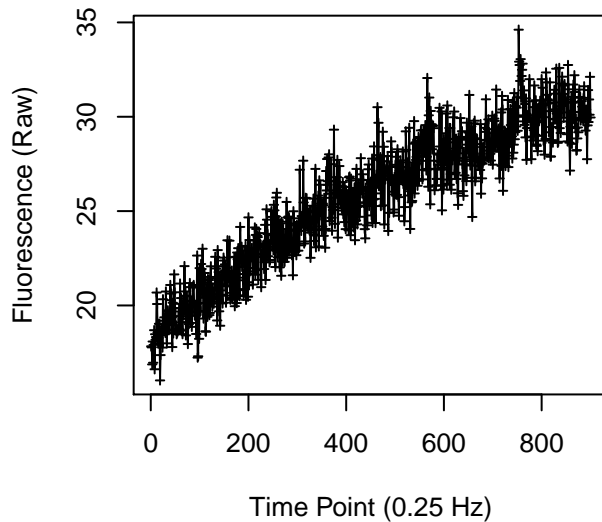

**Cell 573**

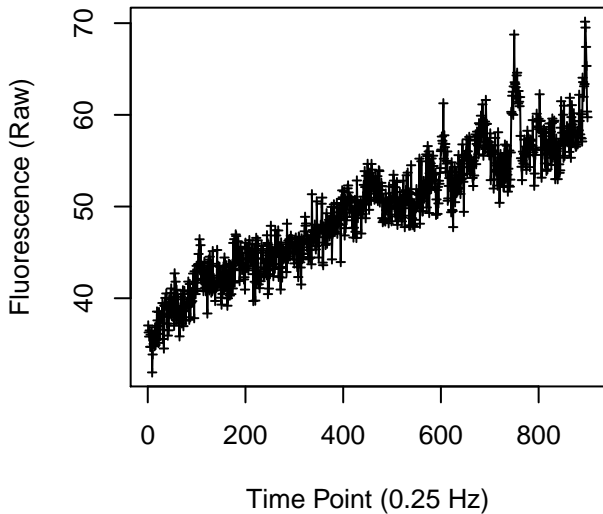

**Cell 574**

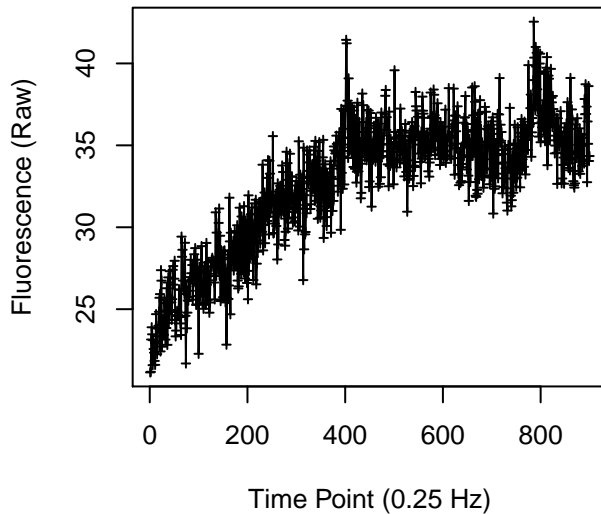

**Cell 575**

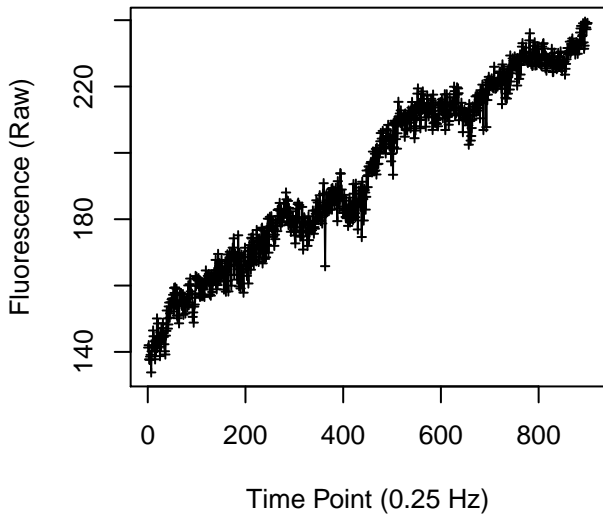

**Cell 576**

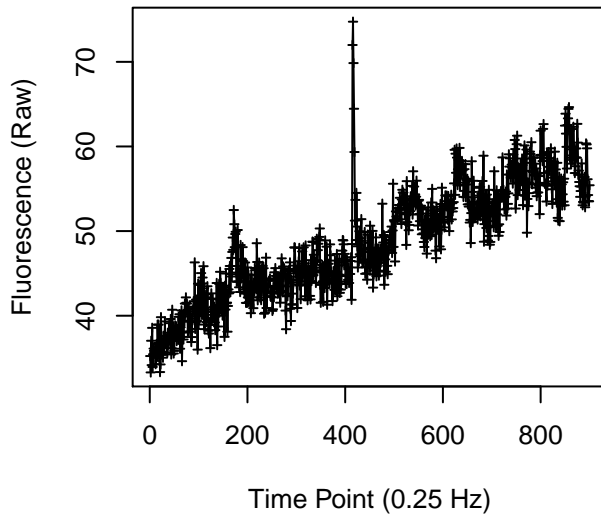

**Cell 577**

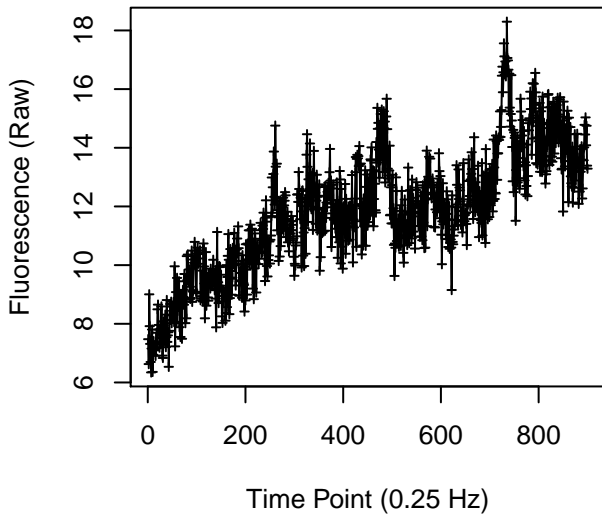

**Cell 578**

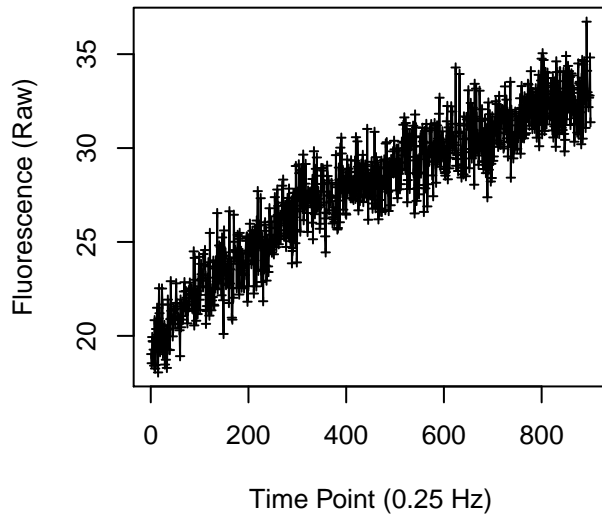

**Cell 579**

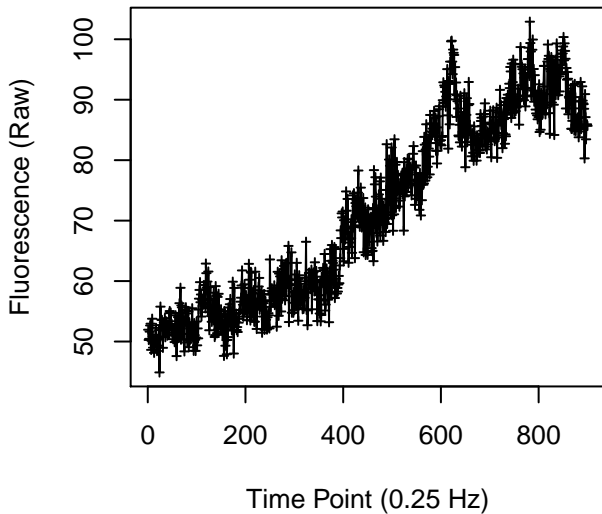

**Cell 580**

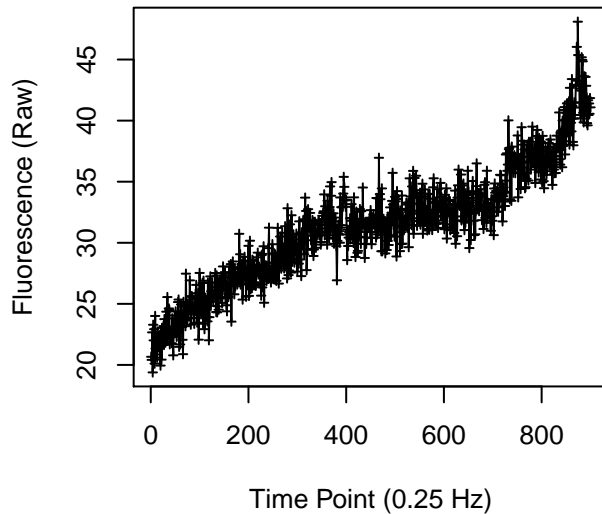

**Cell 581**

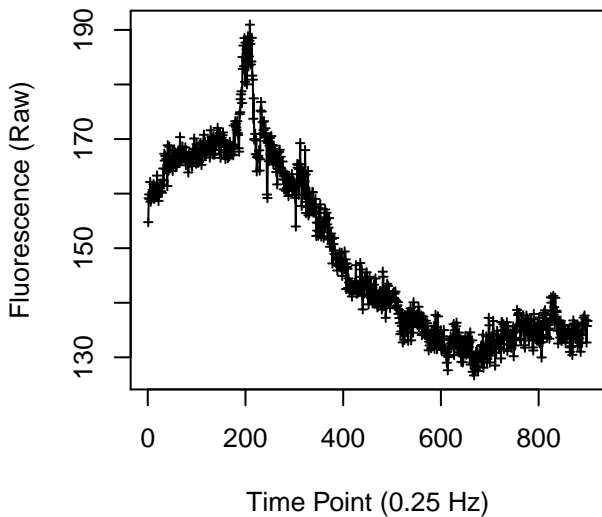

**Cell 582**

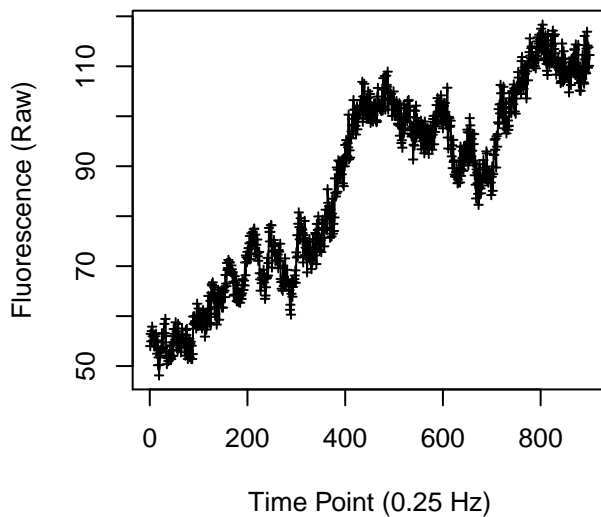

**Cell 583**

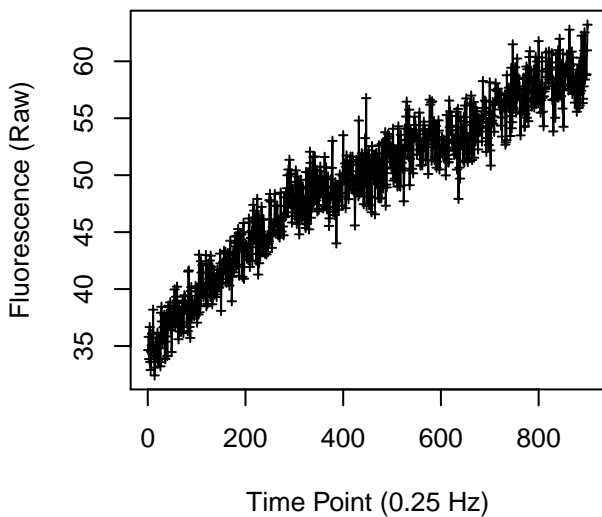

**Cell 584**

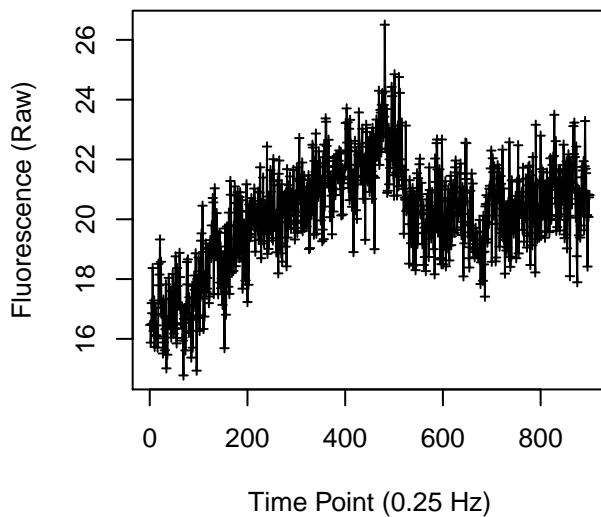



**Cell 585**

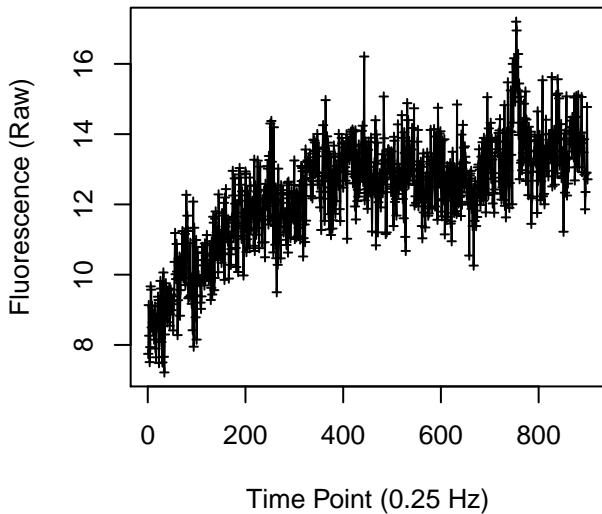

**Cell 586**

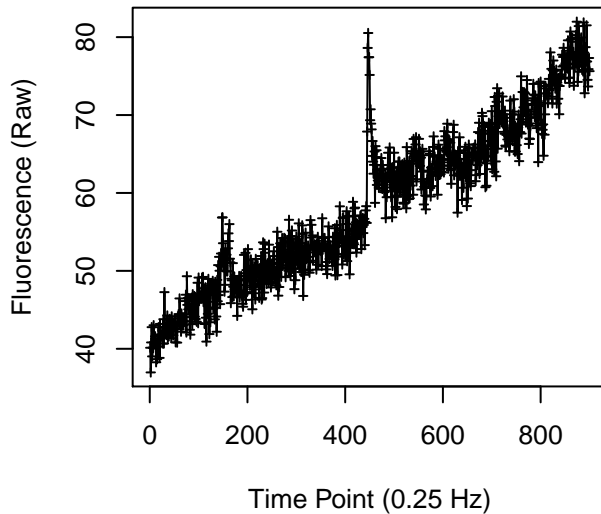

**Cell 587**

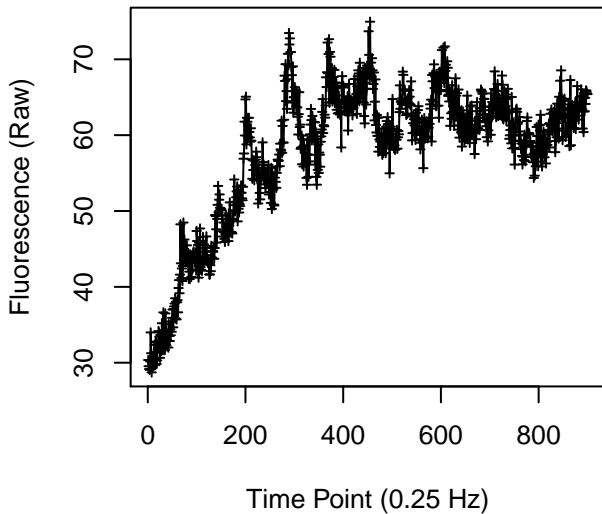

**Cell 588**

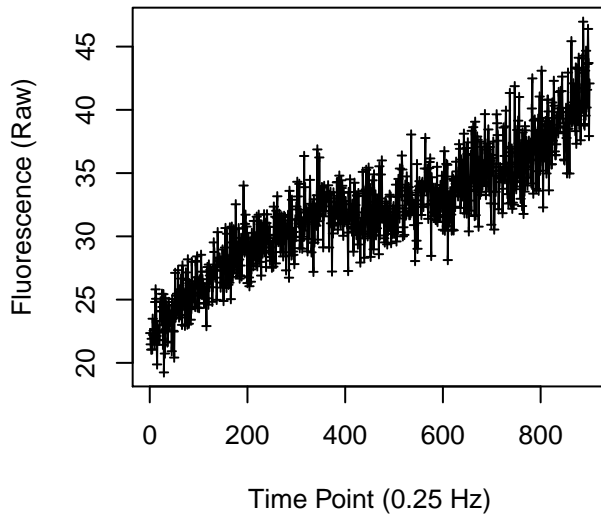

**Cell 589**

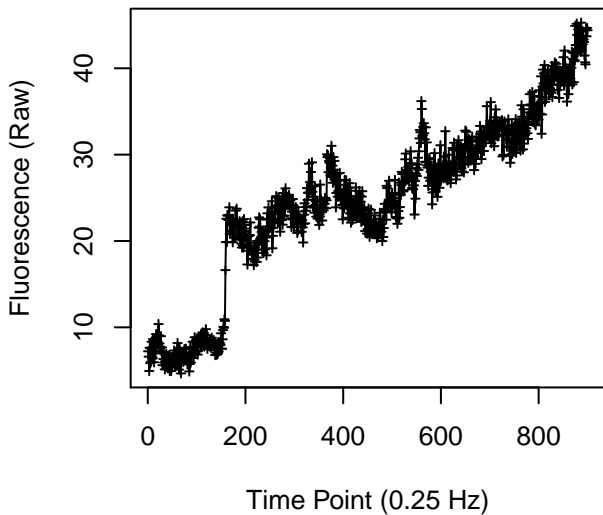

**Cell 590**

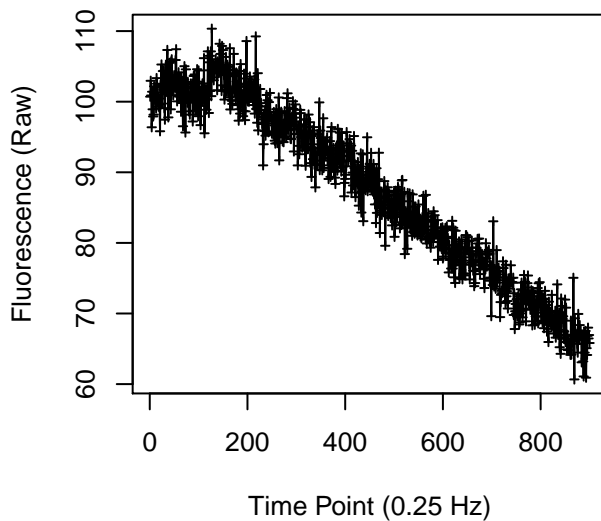

**Cell 591**

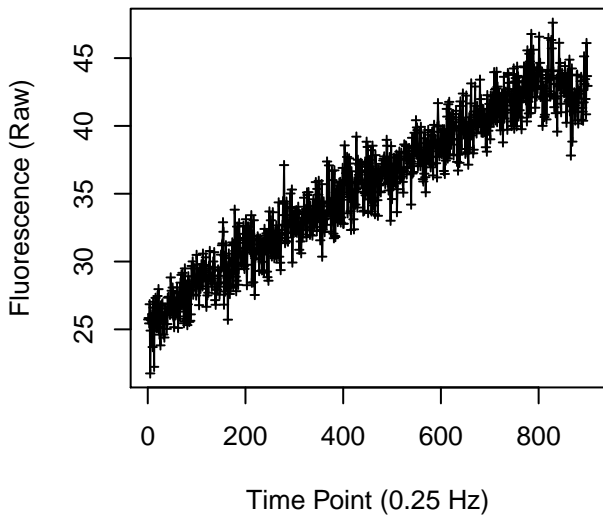

**Cell 592**

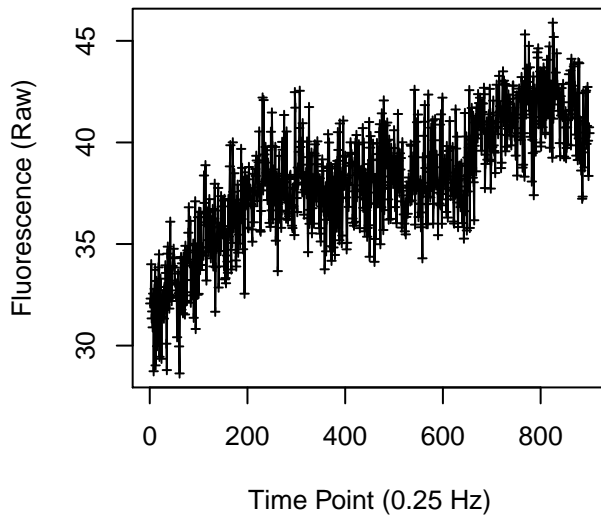

**Cell 593**

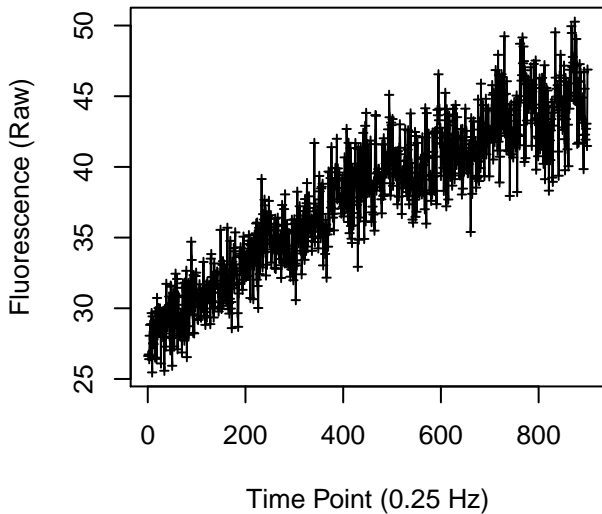

**Cell 594**

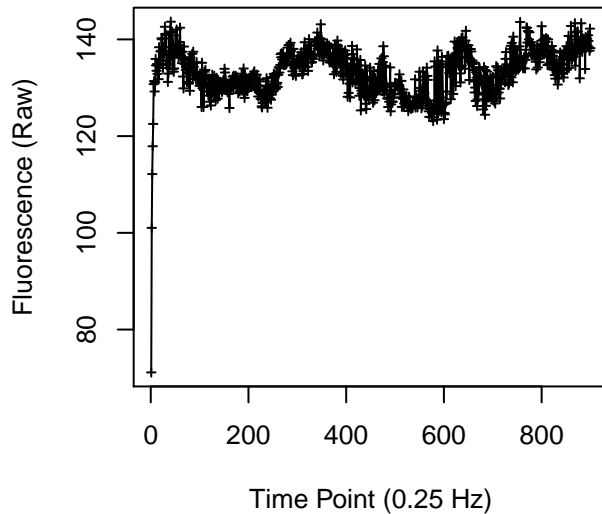

**Cell 595**

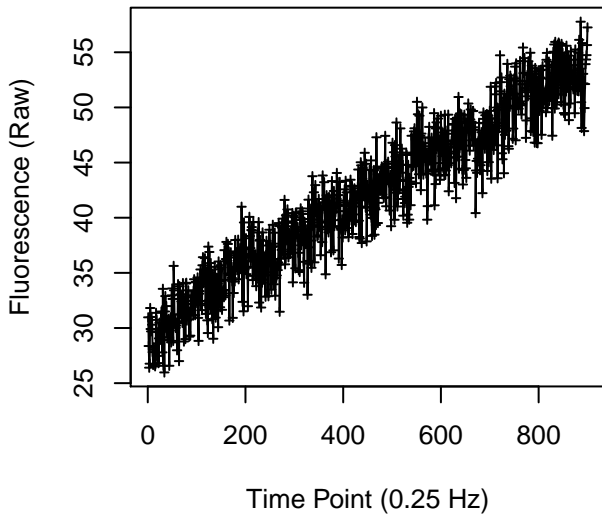

**Cell 596**

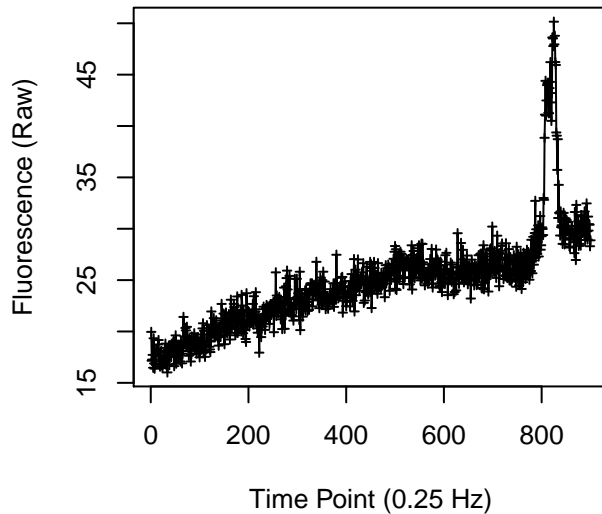

**Cell 597**

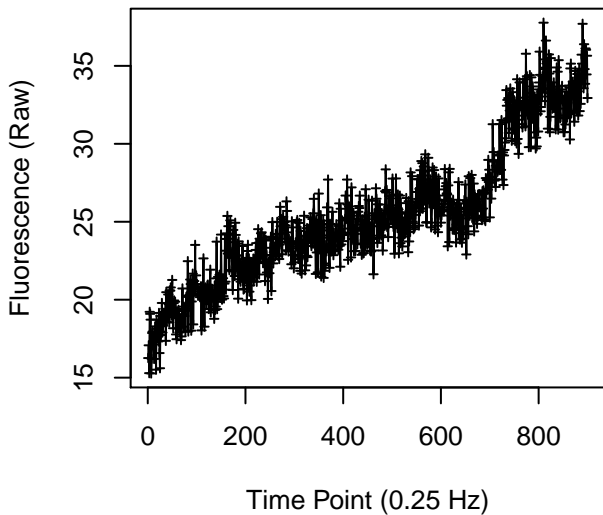

**Cell 598**

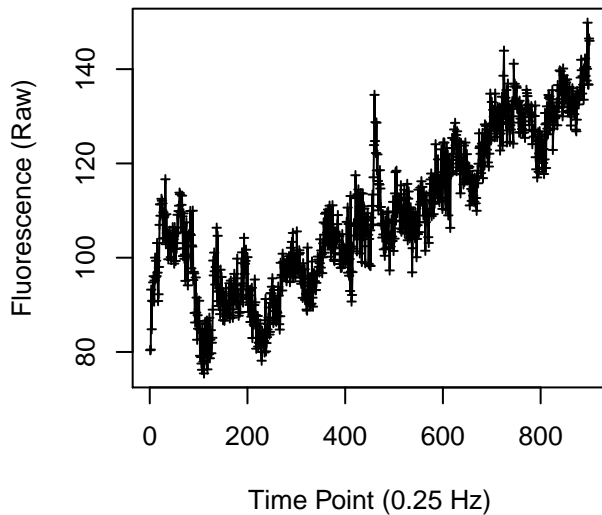

**Cell 599**

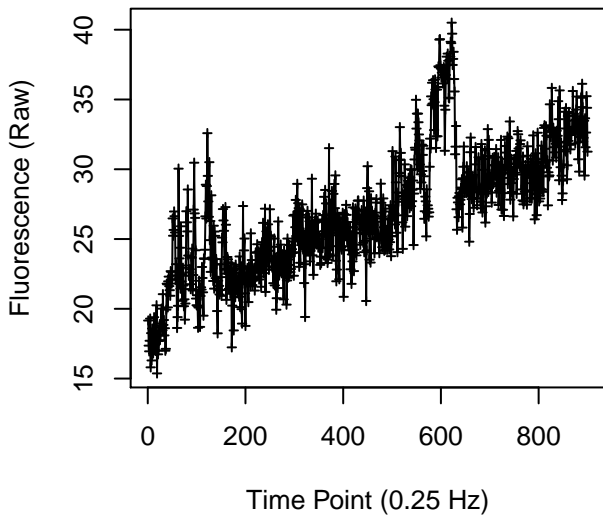

**Cell 600**

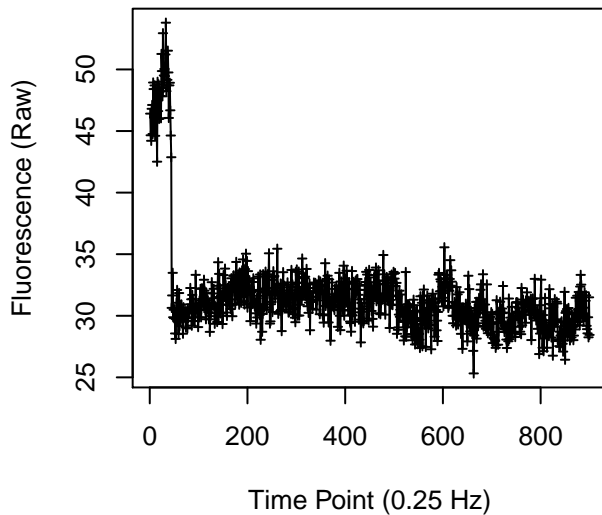

**Cell 601**

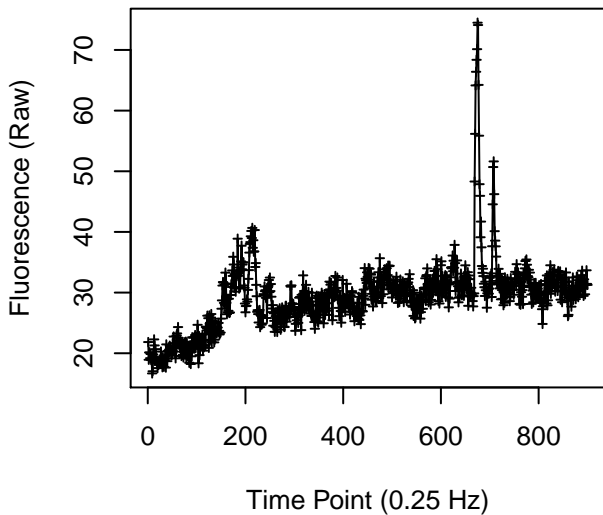

**Cell 602**

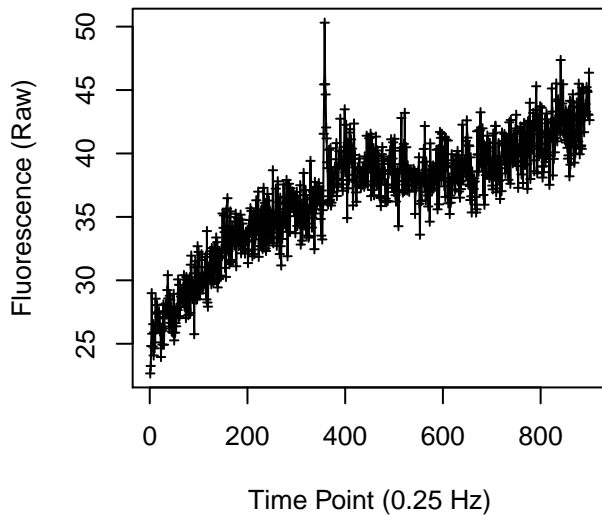

**Cell 603**

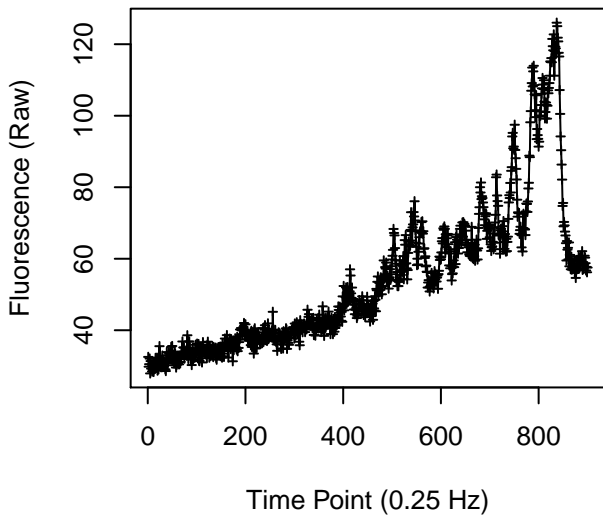

**Cell 604**

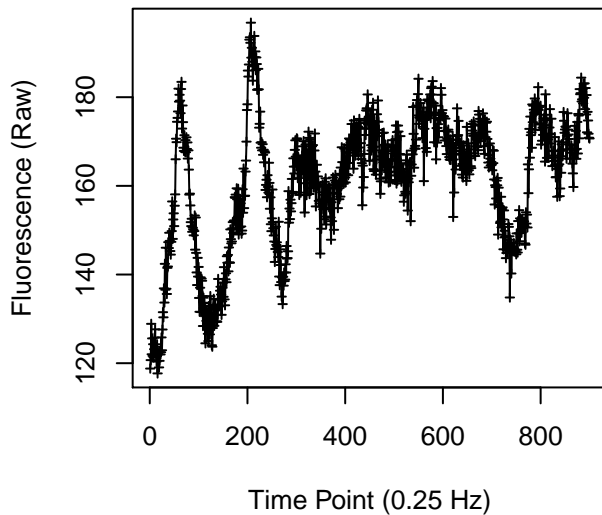

**Cell 605**

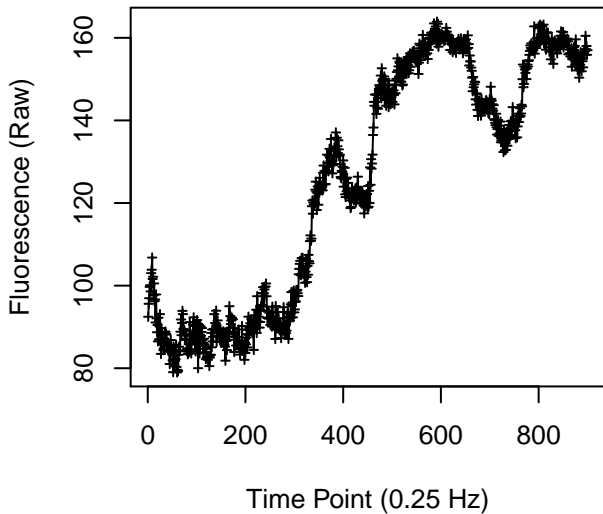

**Cell 606**

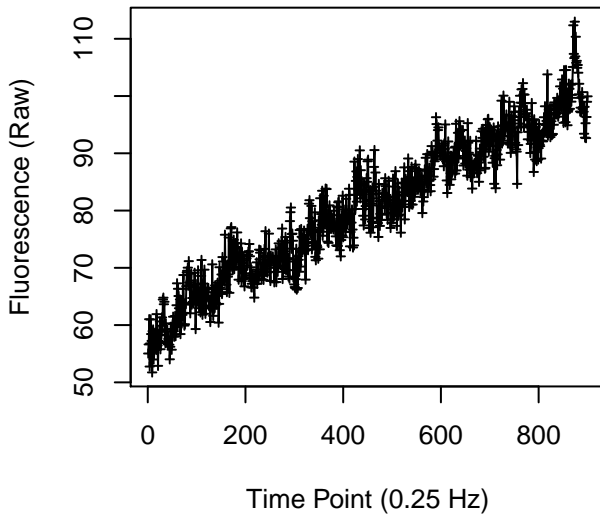

**Cell 607**

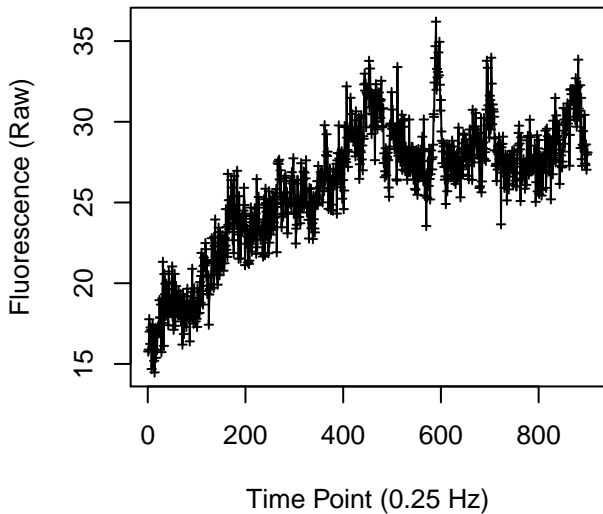

**Cell 608**

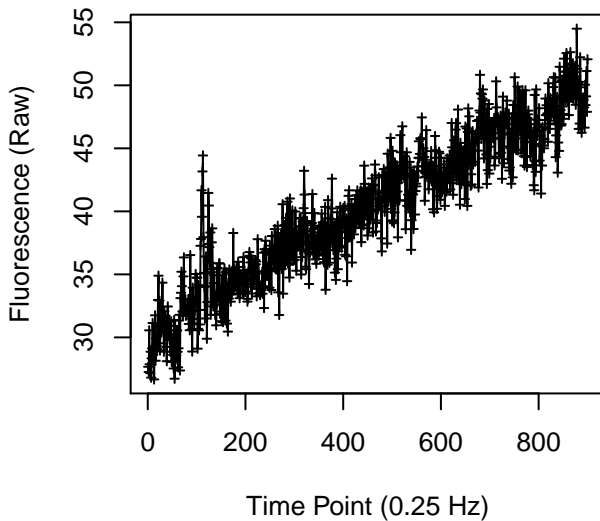

**Cell 609**

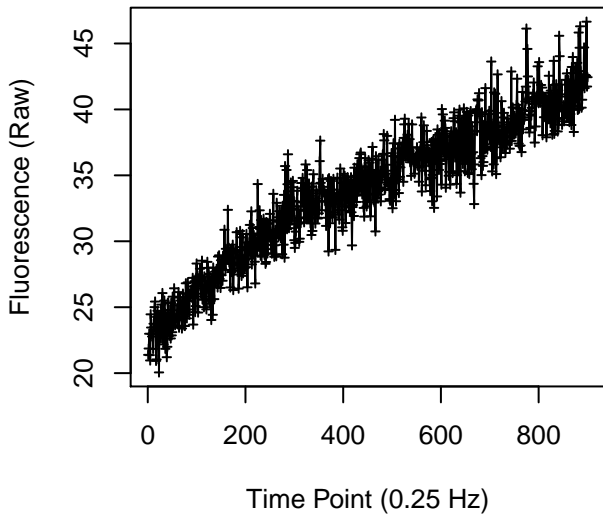

**Cell 610**

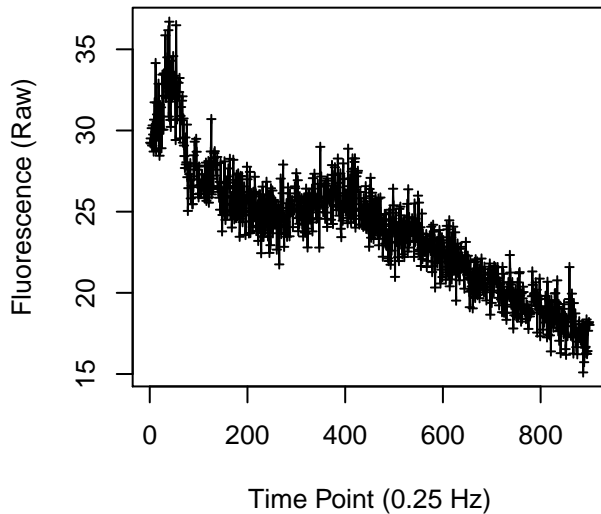

**Cell 611**

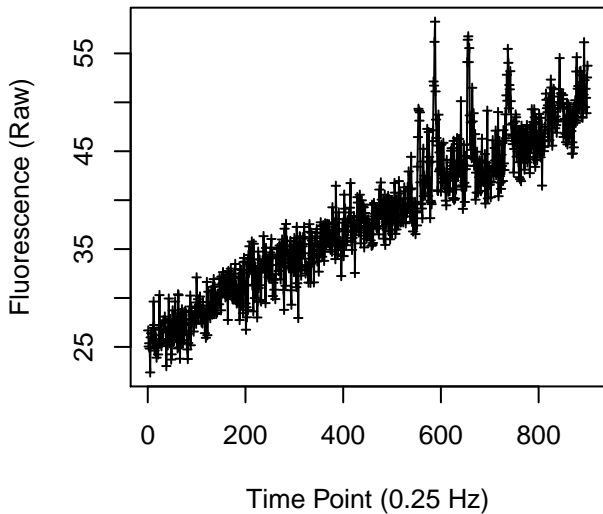

**Cell 612**

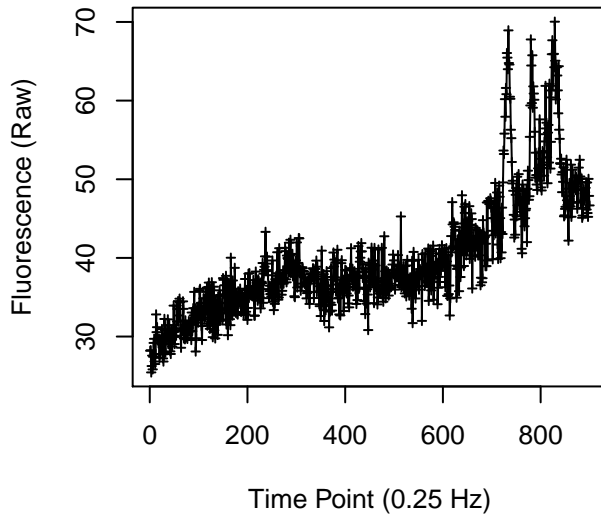

**Cell 613**

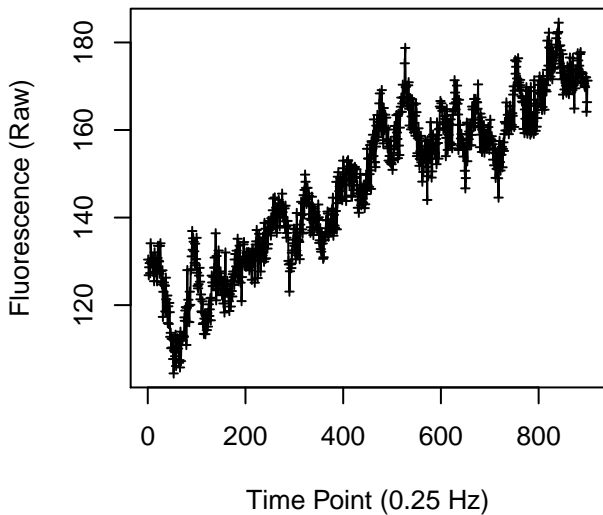

**Cell 614**

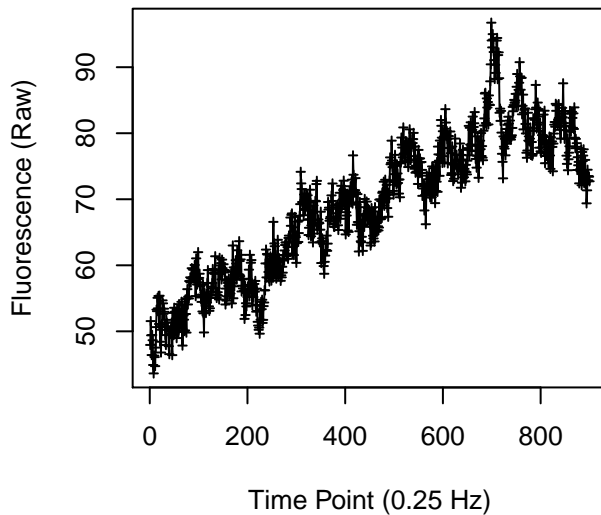

**Cell 615**

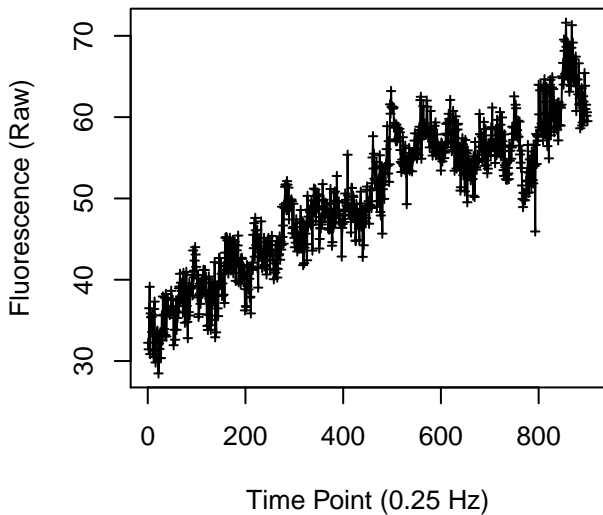

**Cell 616**

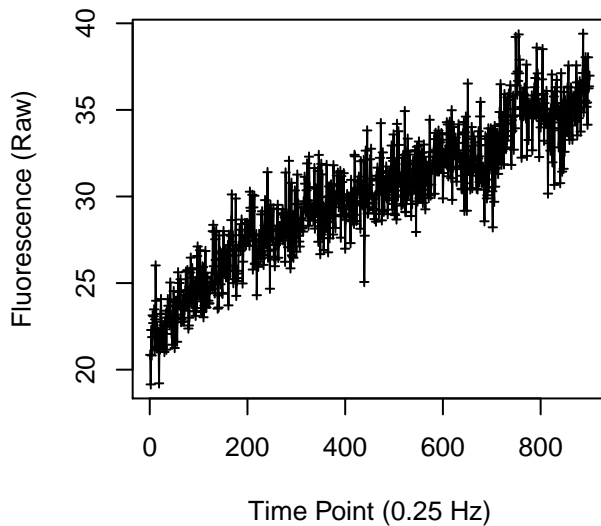



**Cell 617**

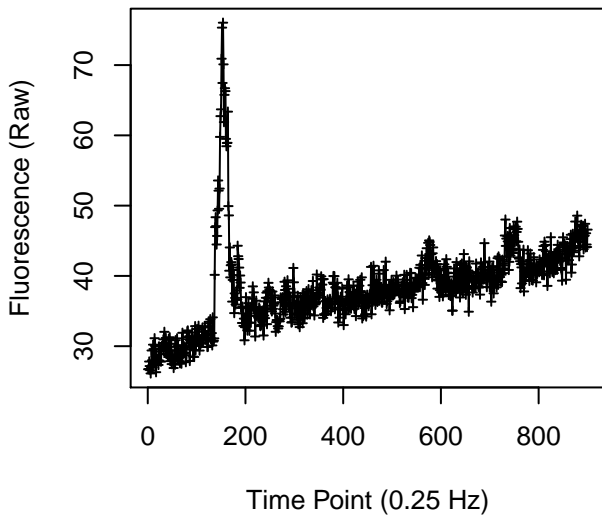

**Cell 618**

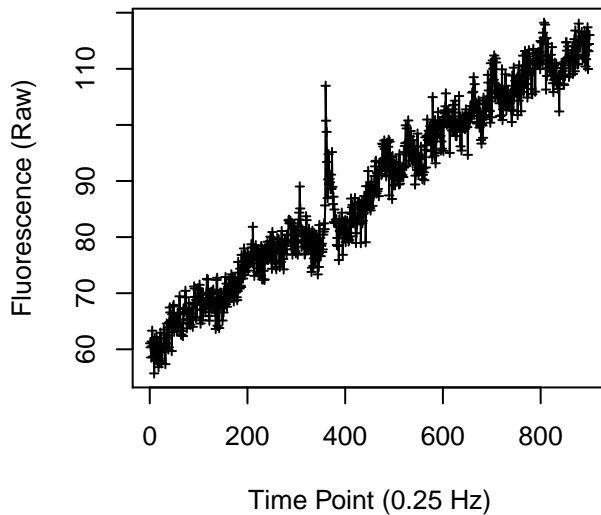

**Cell 619**

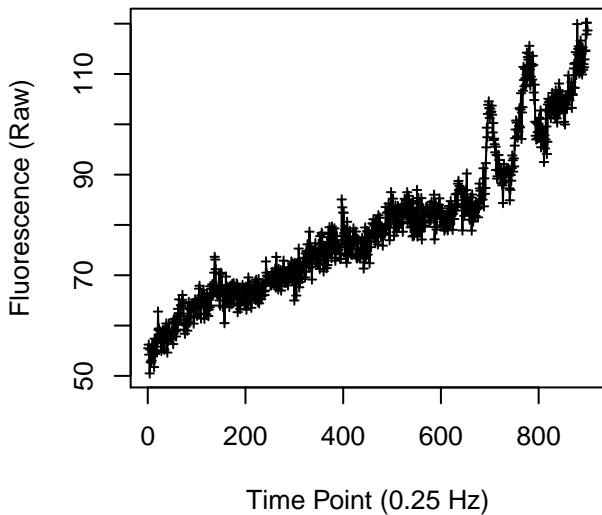

**Cell 620**

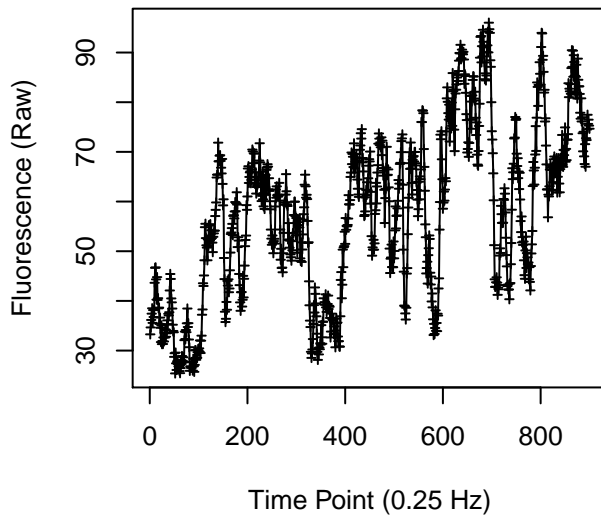

**Cell 621**

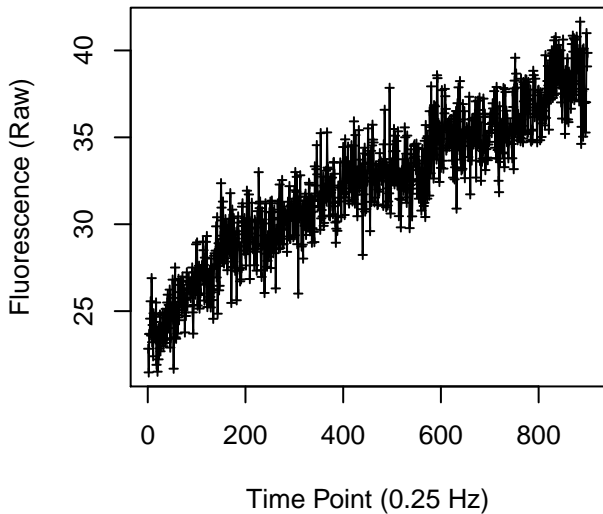

**Cell 622**

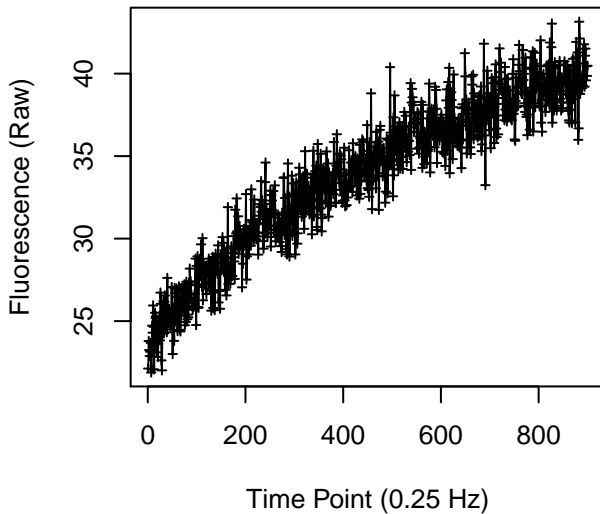

**Cell 623**

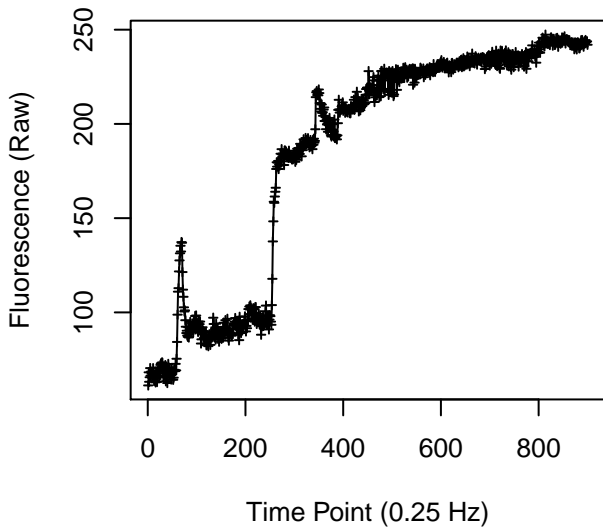

**Cell 624**

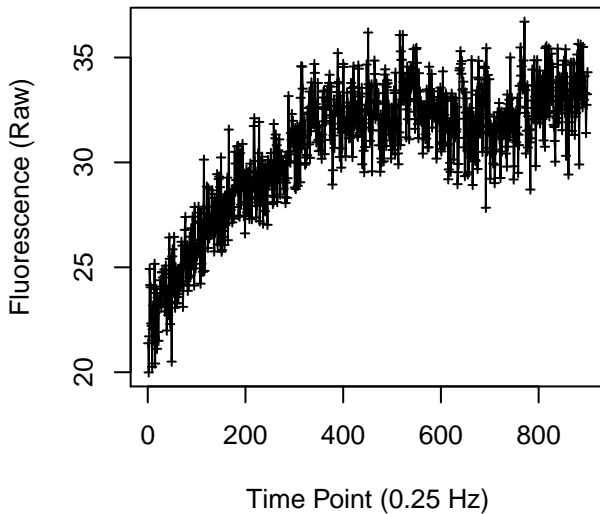

**Cell 625**

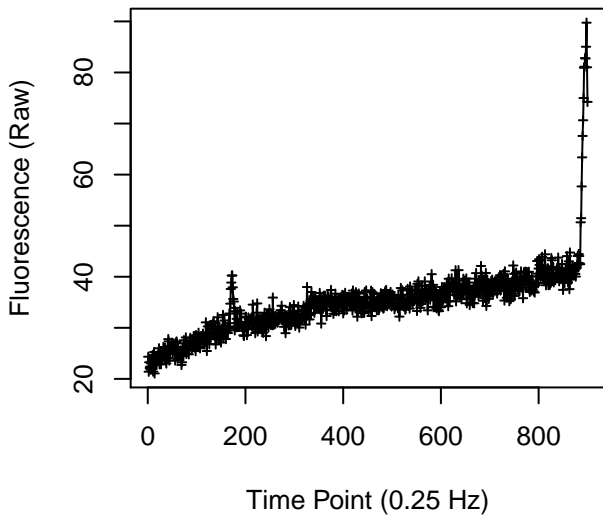

**Cell 626**

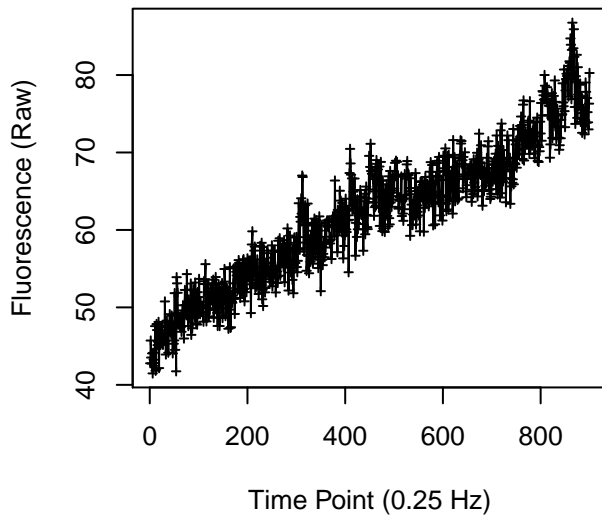

**Cell 627**

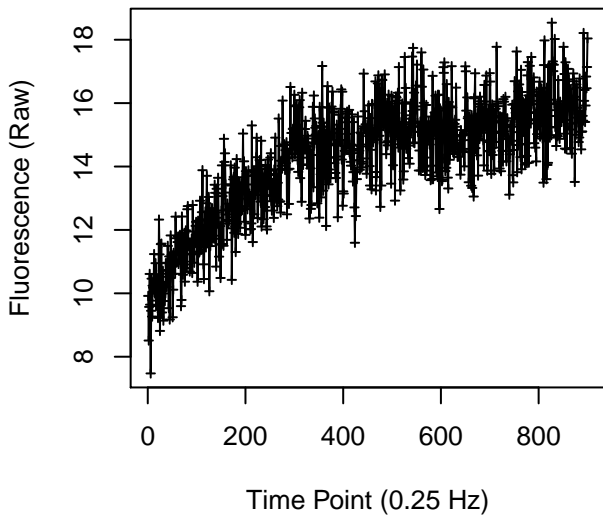

**Cell 628**

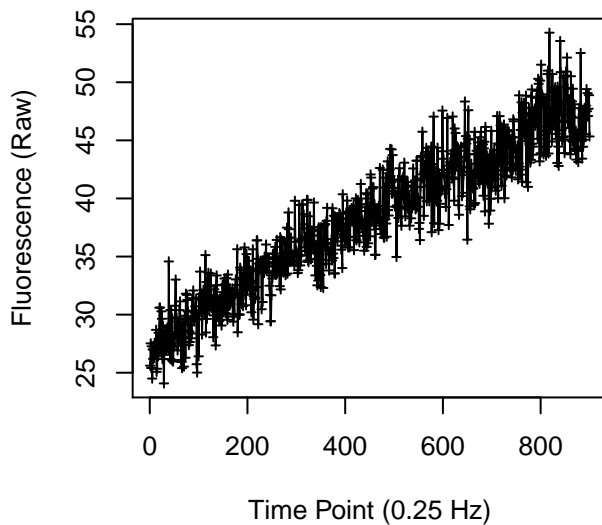

**Cell 629**

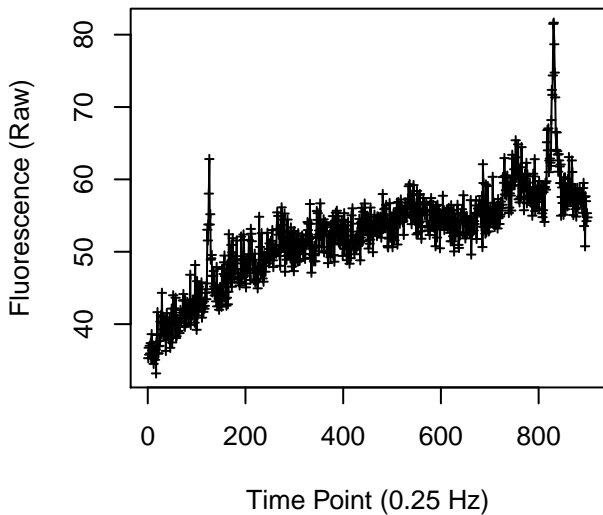

**Cell 630**

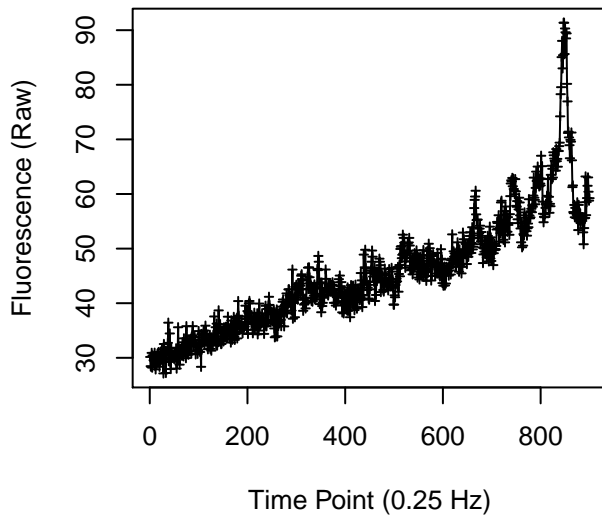

**Cell 631**

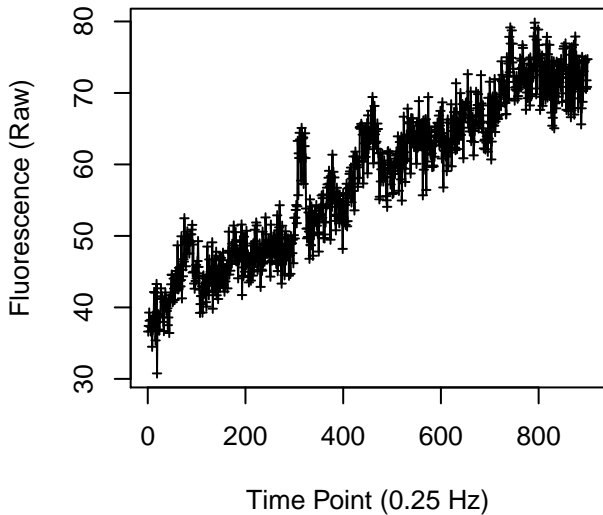

**Cell 632**

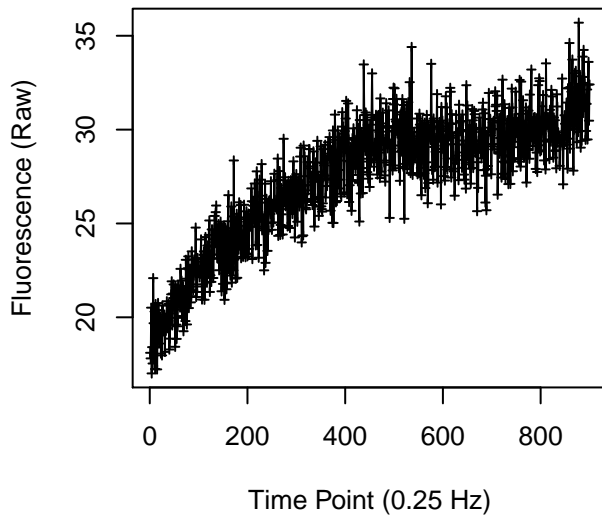

**Cell 633**

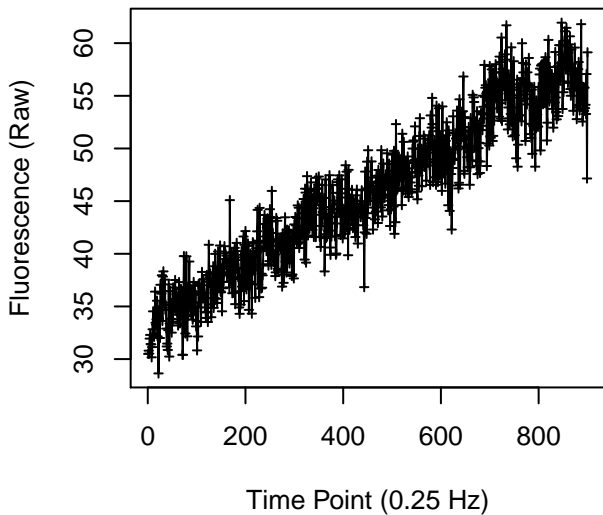

**Cell 634**

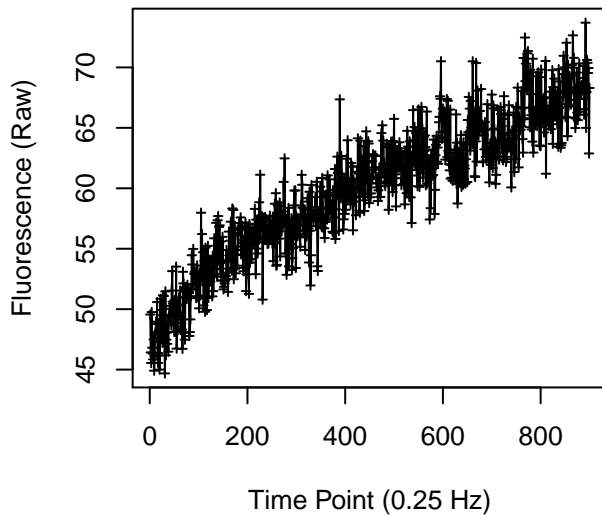

**Cell 635**

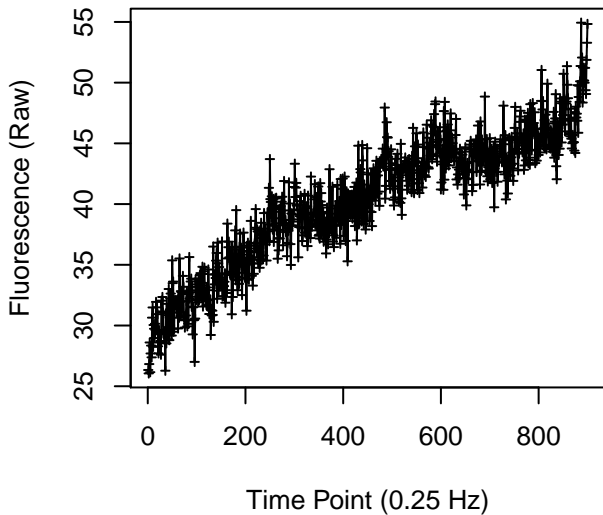

**Cell 636**

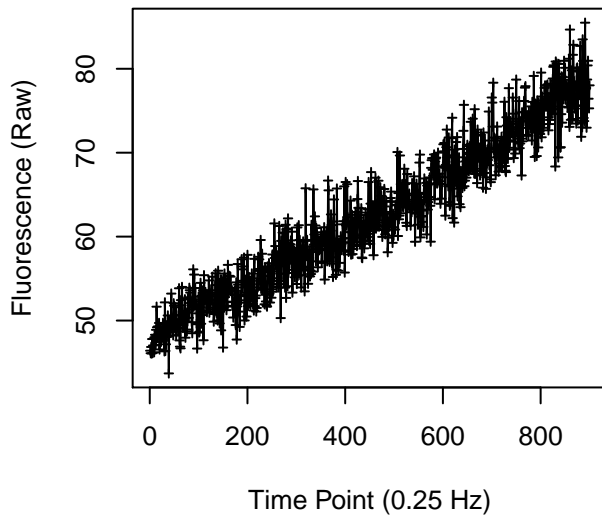

**Cell 637**

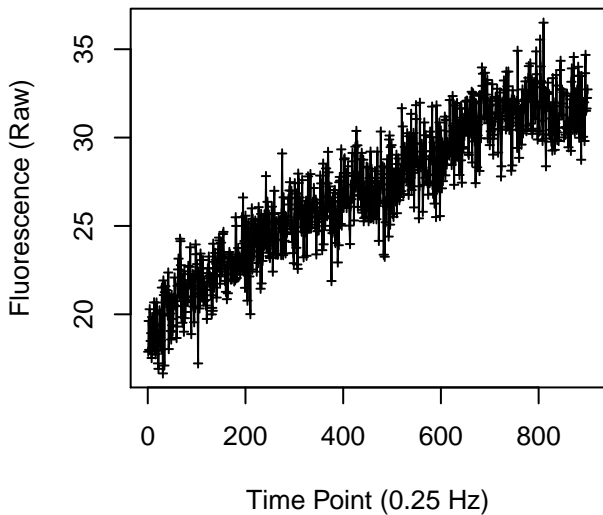

**Cell 638**

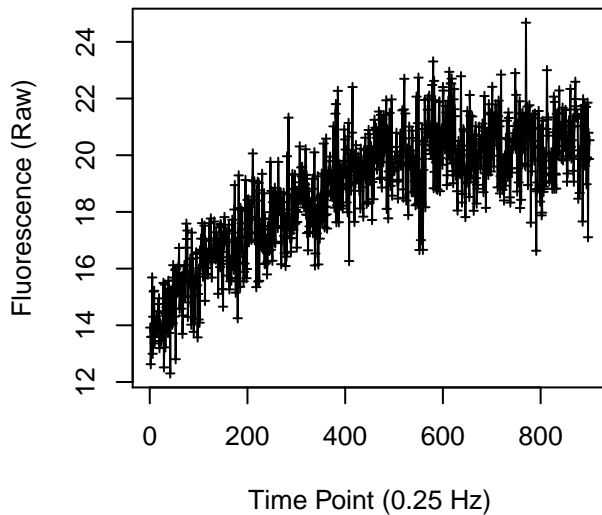

**Cell 639**

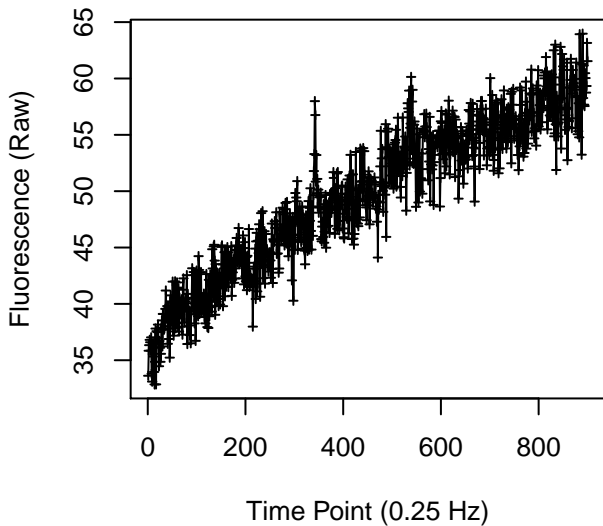

**Cell 640**

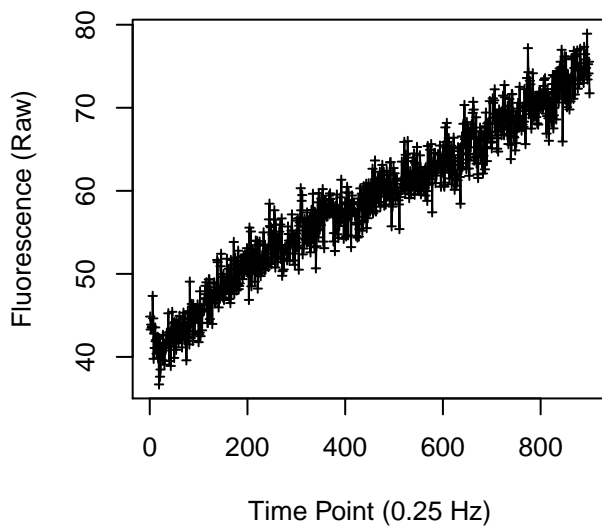

**Cell 641**

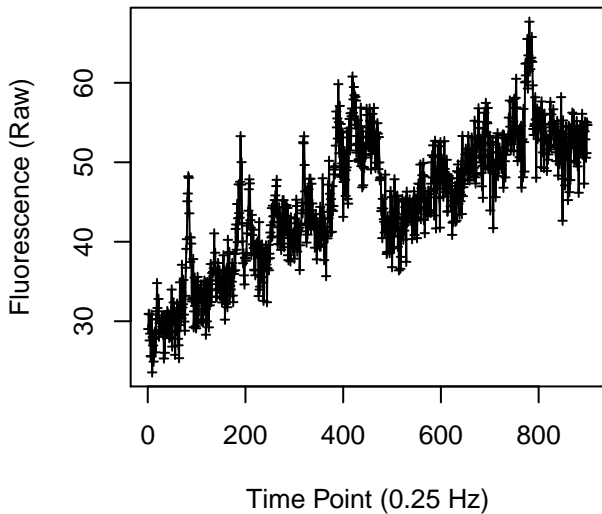

**Cell 642**

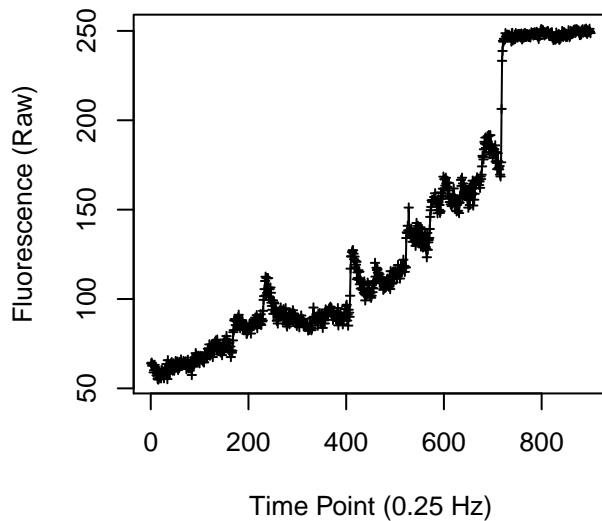

**Cell 643**

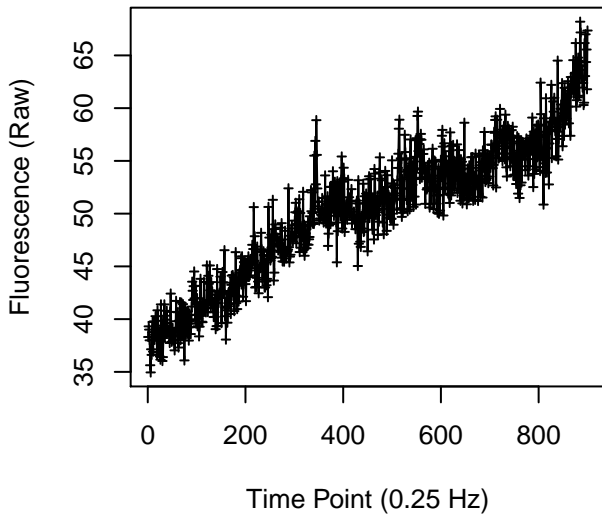

**Cell 644**

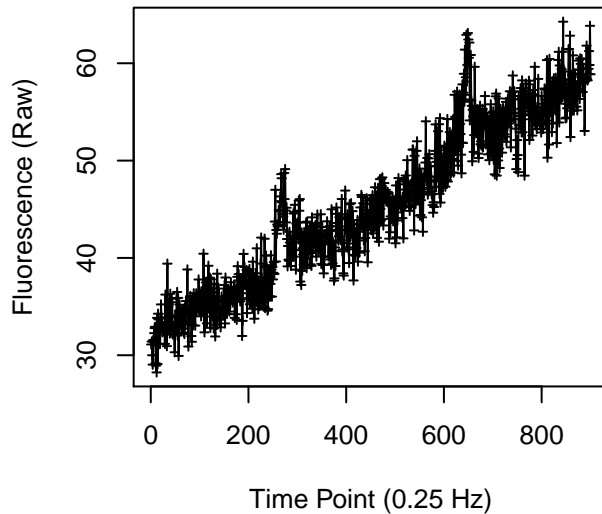

**Cell 645**

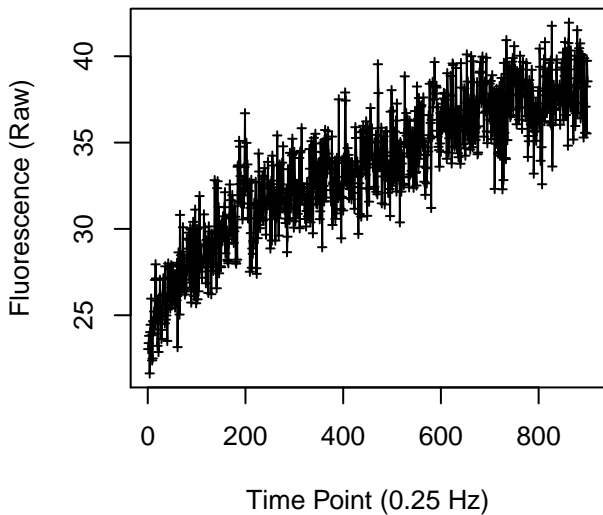

**Cell 646**

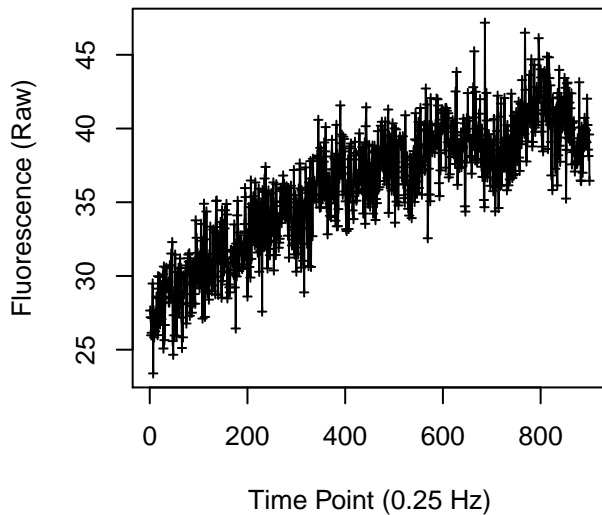

**Cell 647**

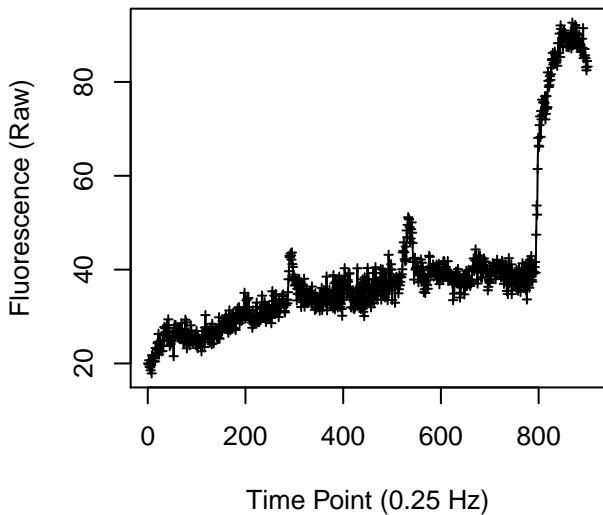

**Cell 648**

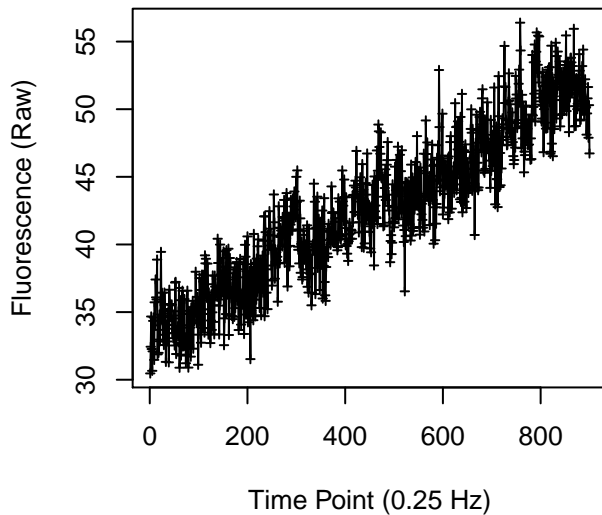



**Cell 649**

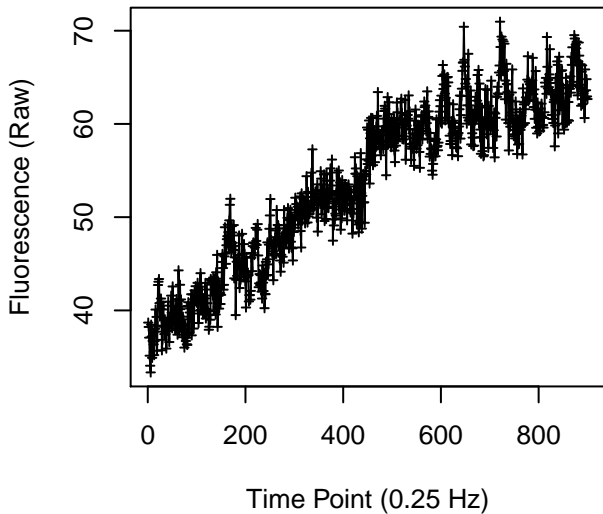

**Cell 650**

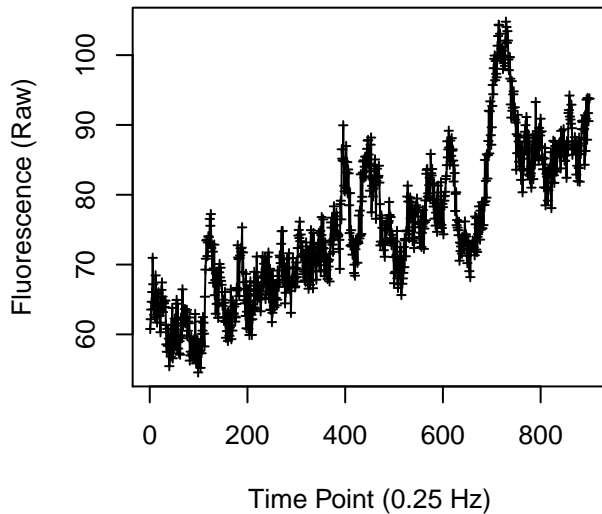

**Cell 651**

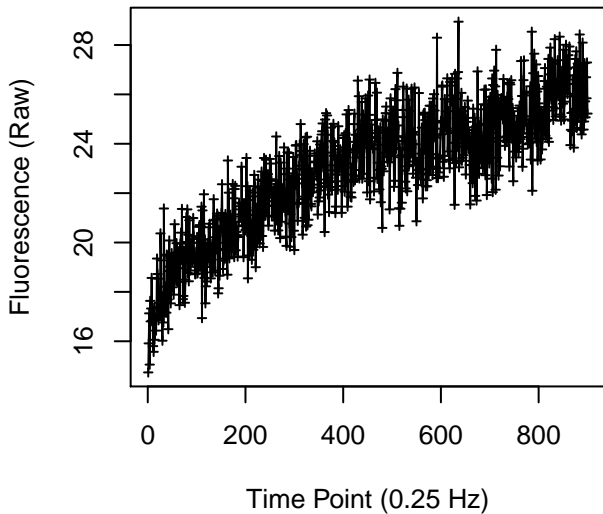

**Cell 652**

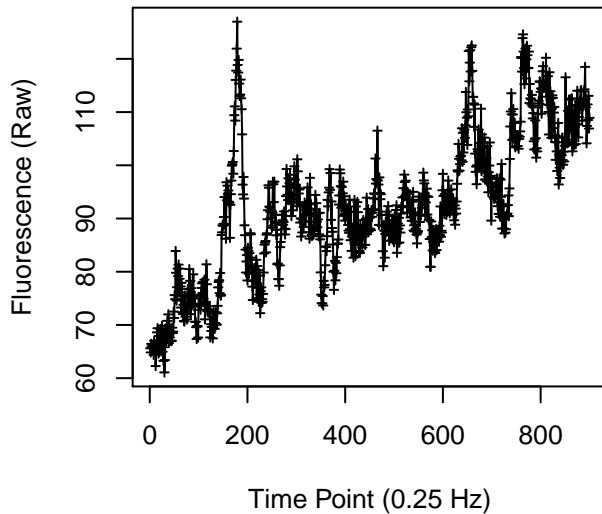

**Cell 653**

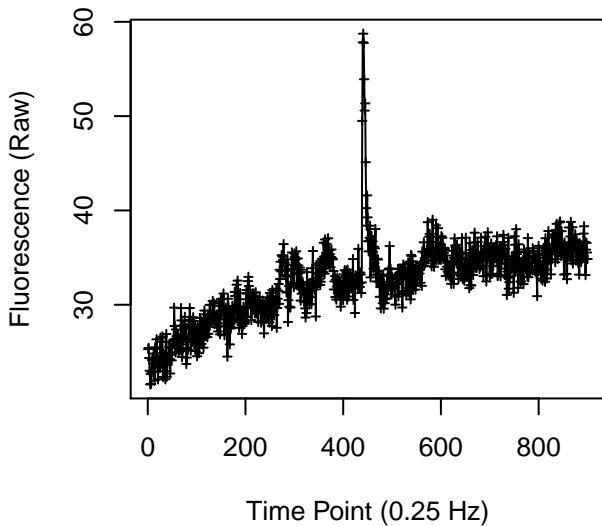

**Cell 654**

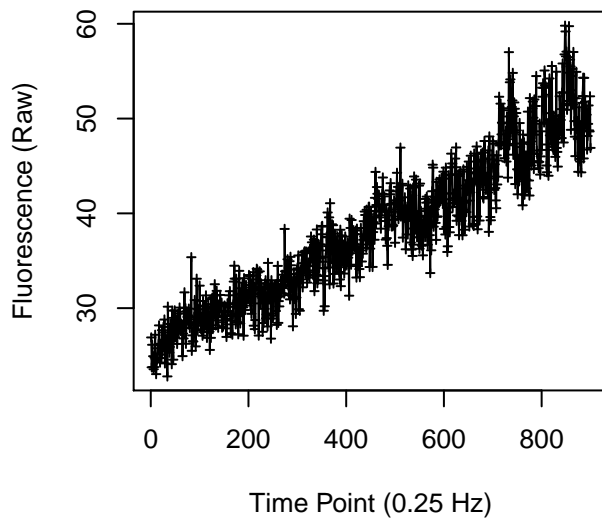

**Cell 655**

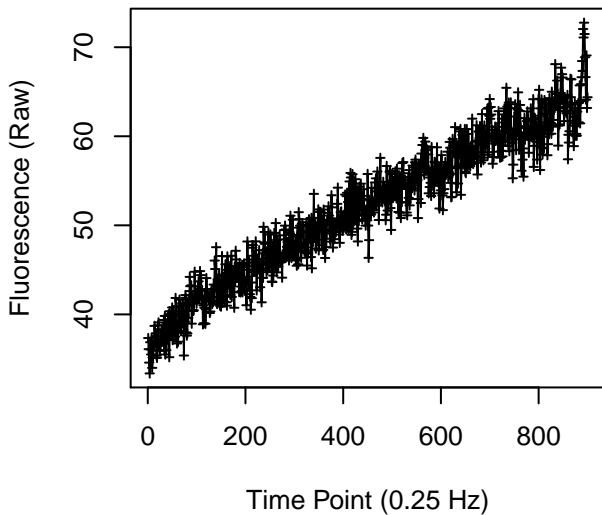

**Cell 656**

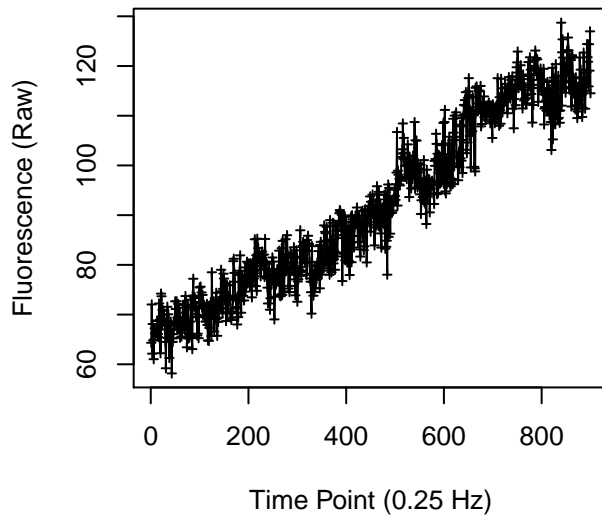

**Cell 657**

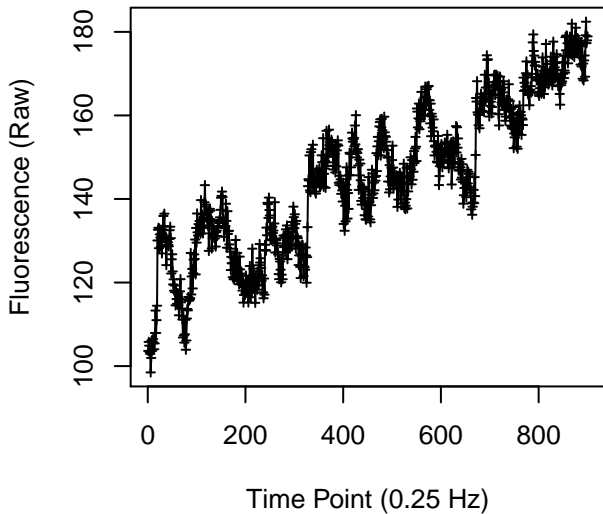

**Cell 658**

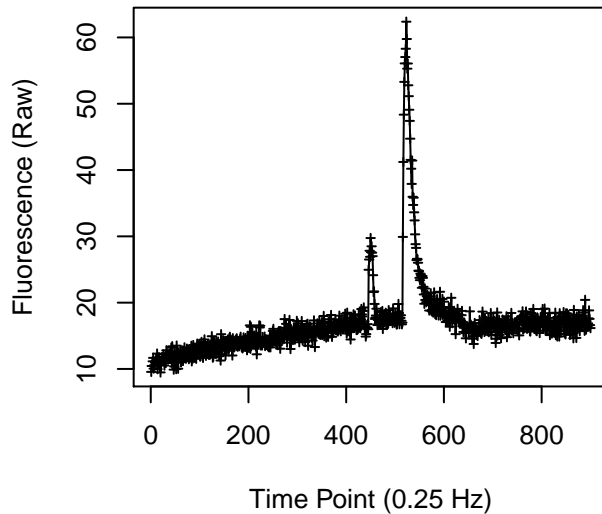

**Cell 659**

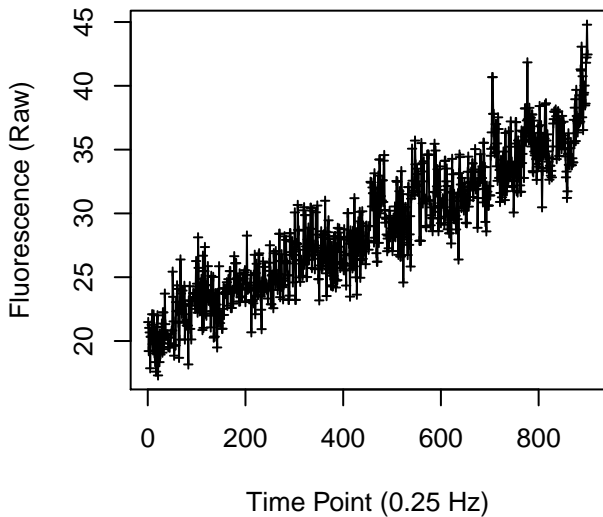

**Cell 660**

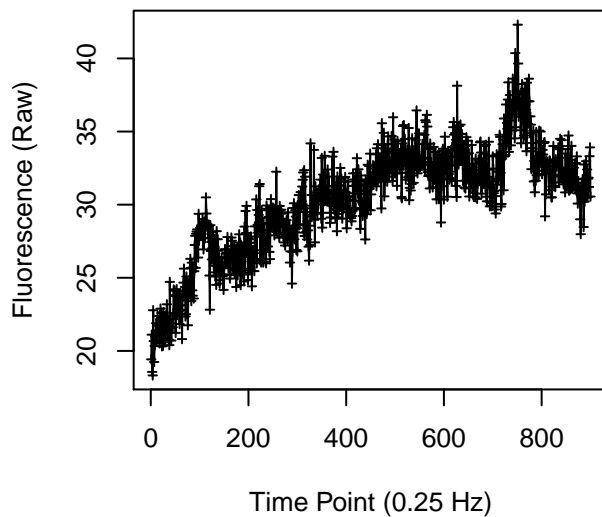

**Cell 661**

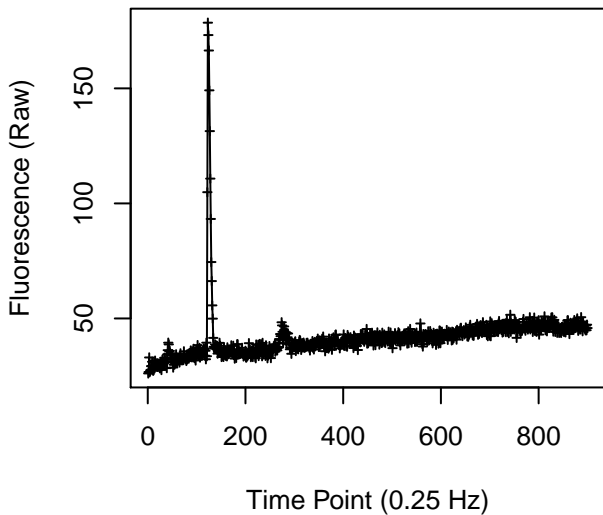

**Cell 662**

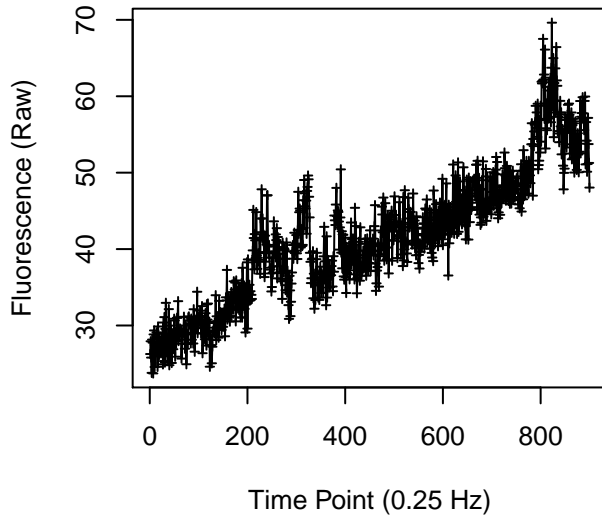

**Cell 663**

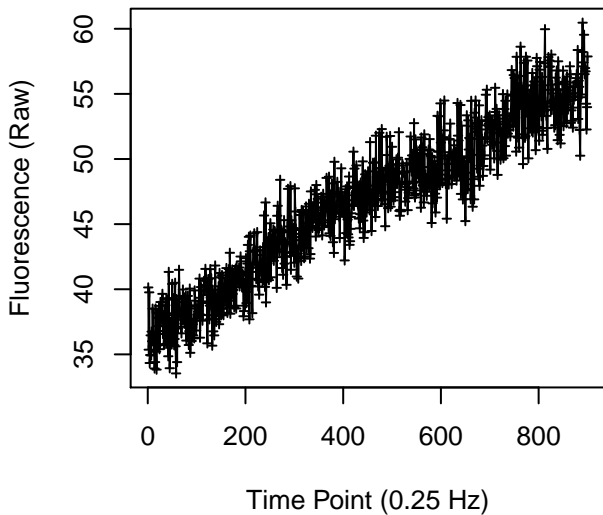

**Cell 664**

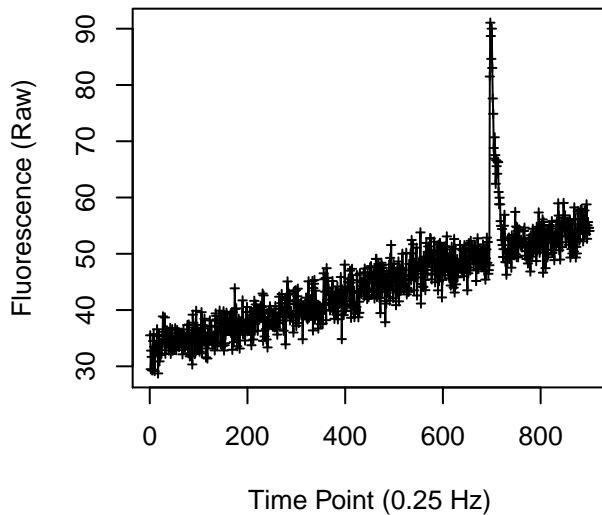

**Cell 665**

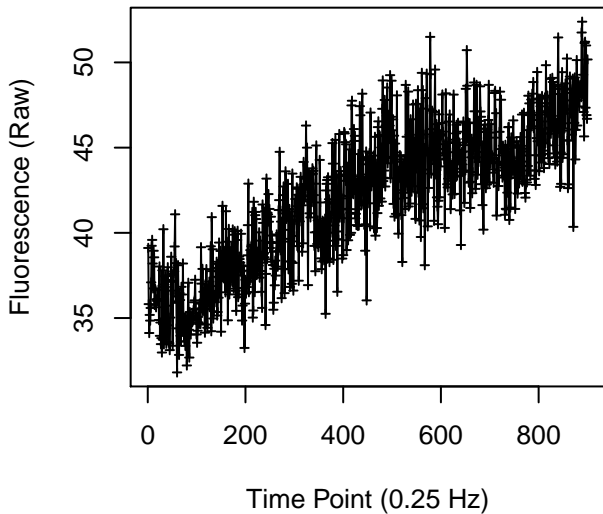

**Cell 666**

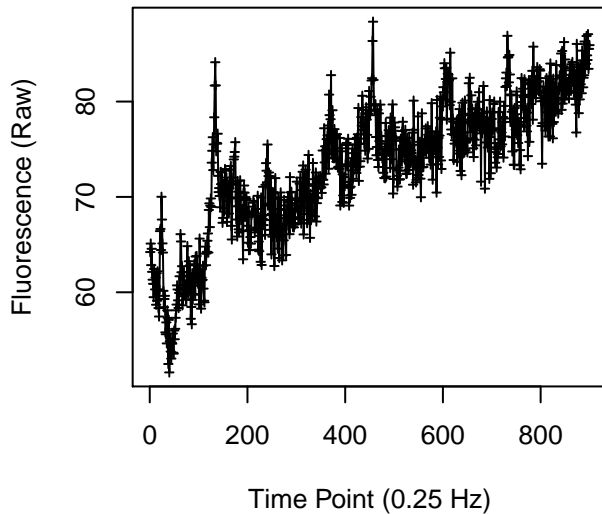

**Cell 667**

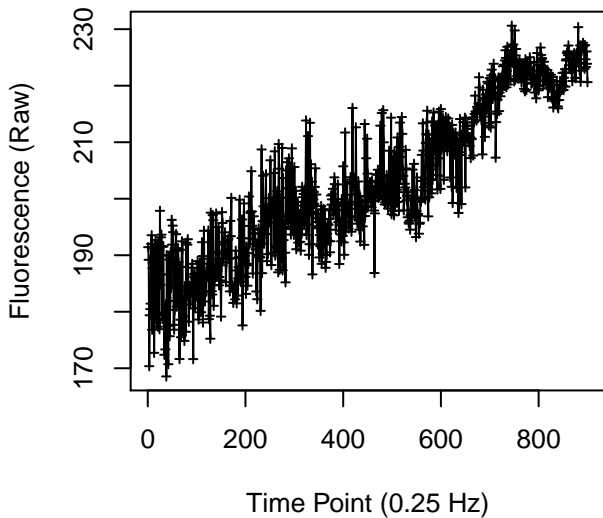

**Cell 668**

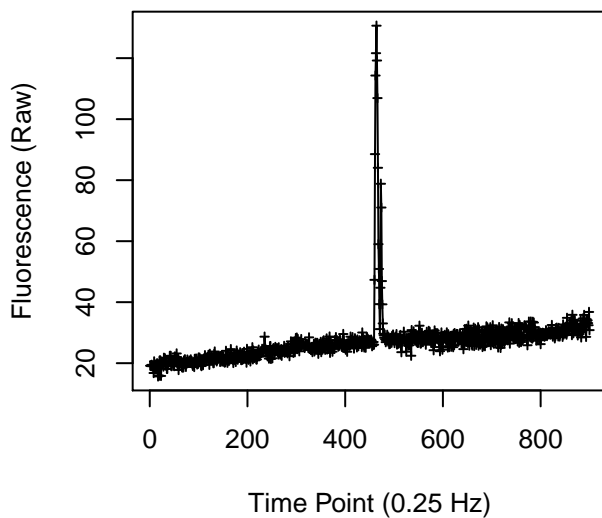

**Cell 669**

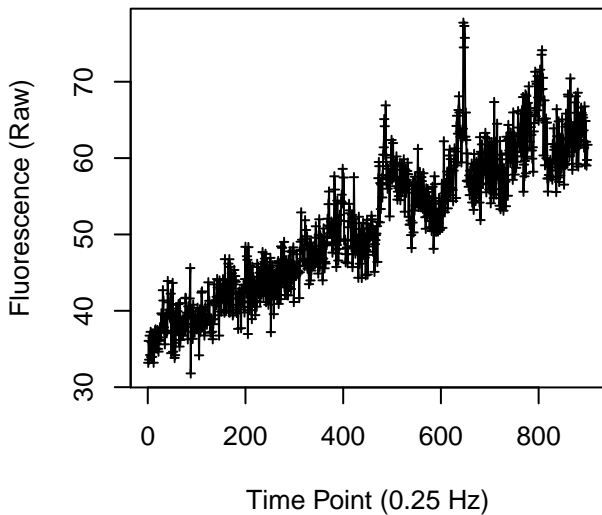

**Cell 670**

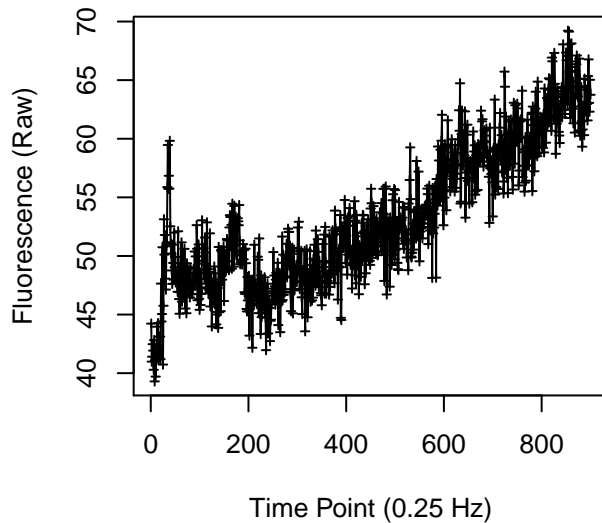

**Cell 671**

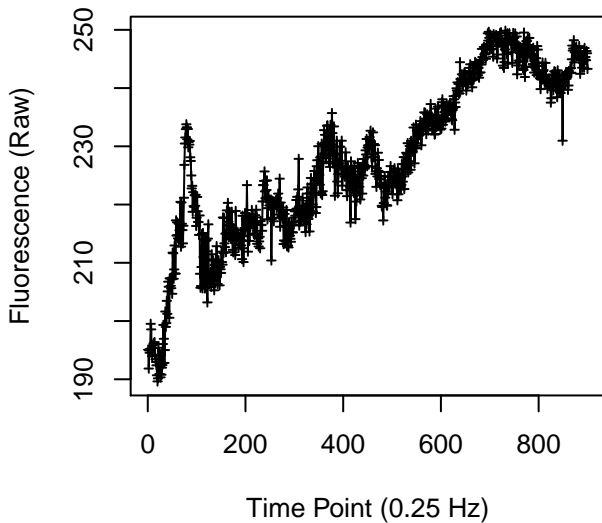

**Cell 672**

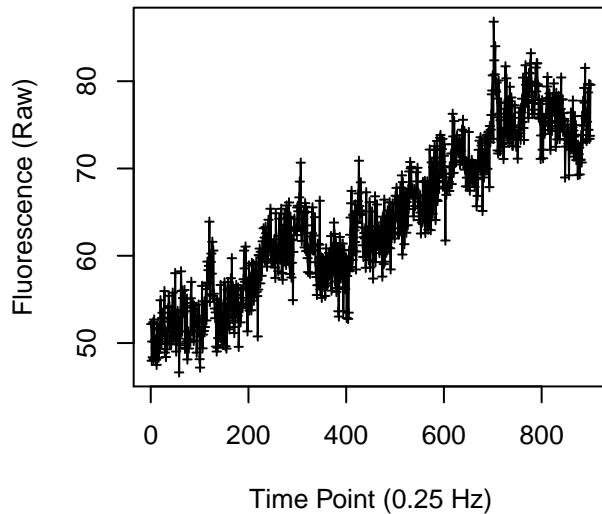

**Cell 673**

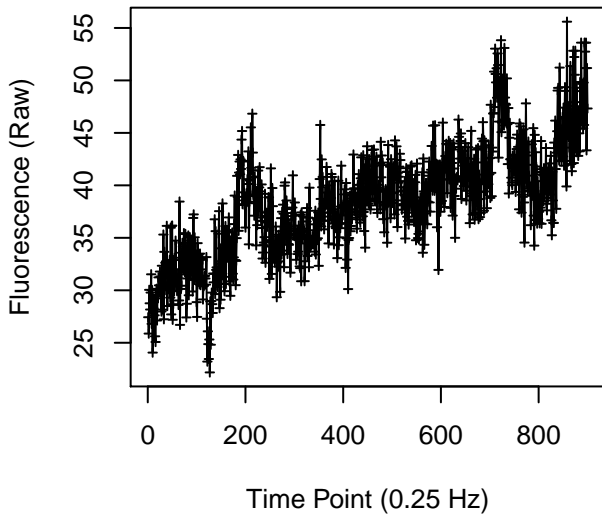

**Cell 674**

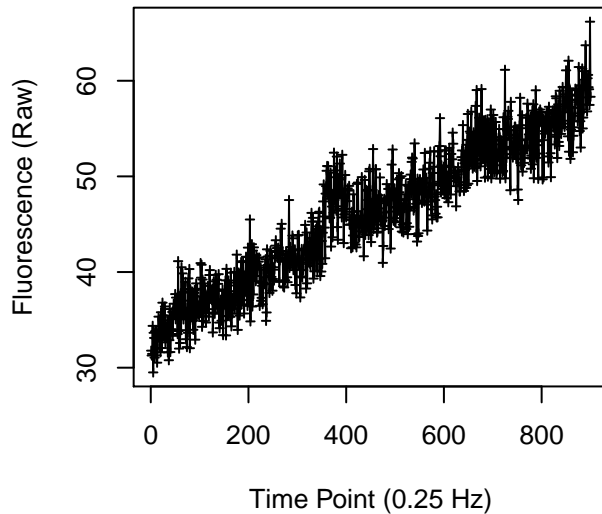

**Cell 675**

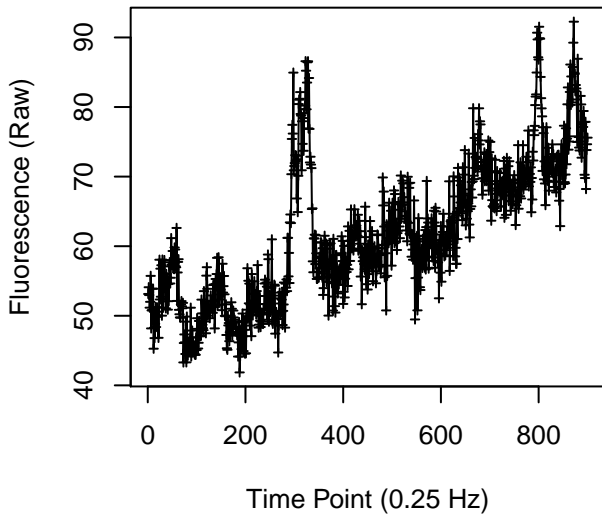

**Cell 676**

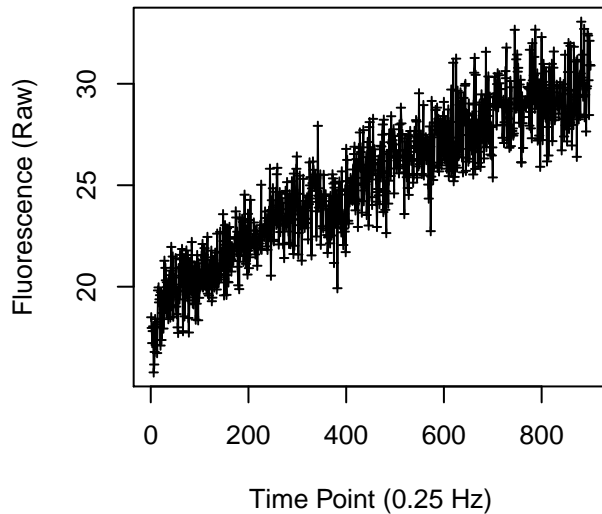

**Cell 677**

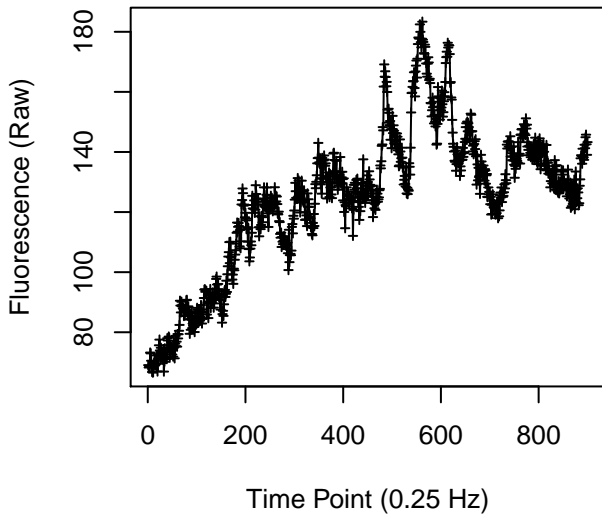

**Cell 678**

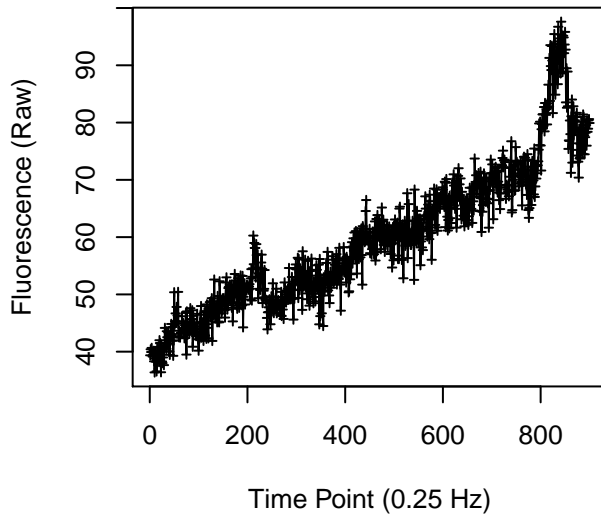

**Cell 679**

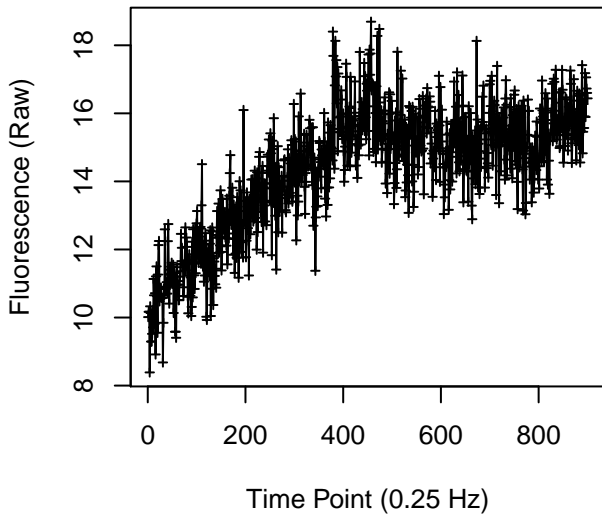

**Cell 680**

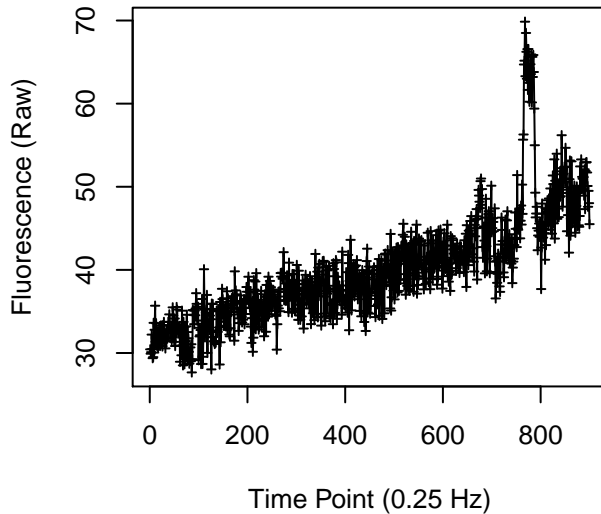



**Cell 681**

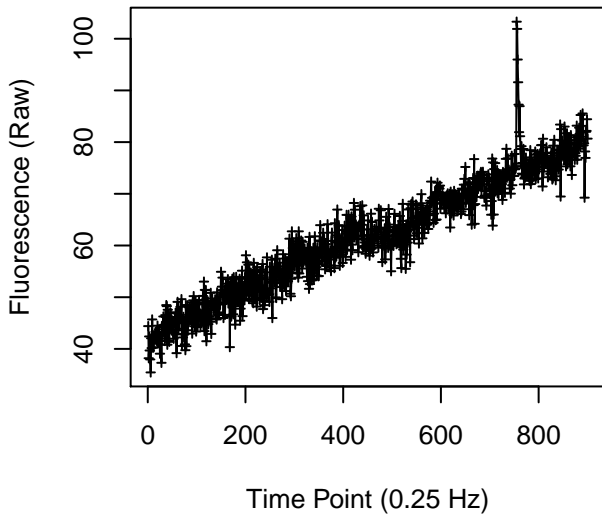

**Cell 682**

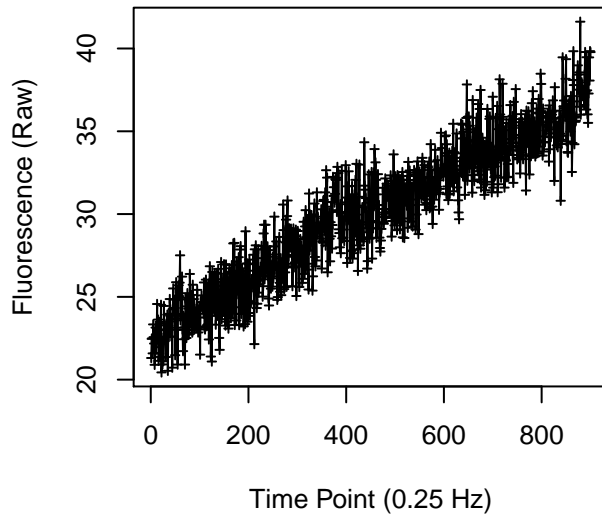

**Cell 683**

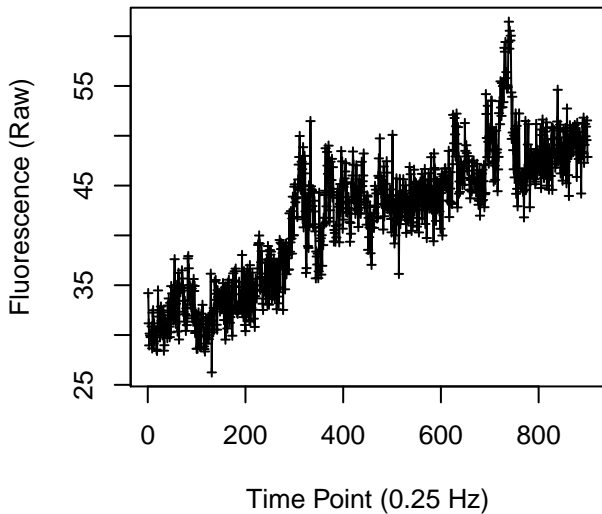

**Cell 684**

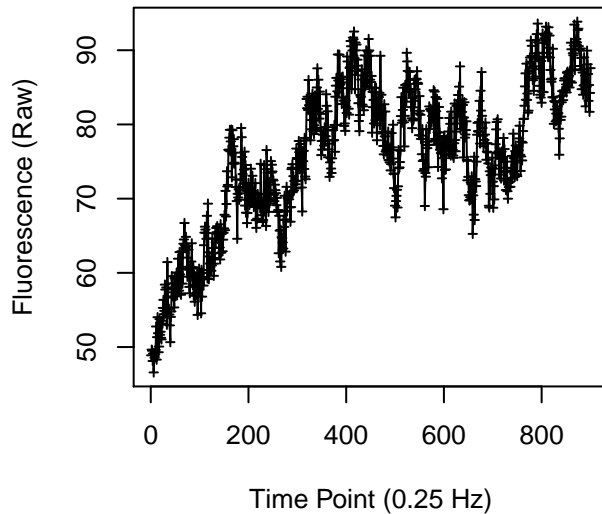

**Cell 685**

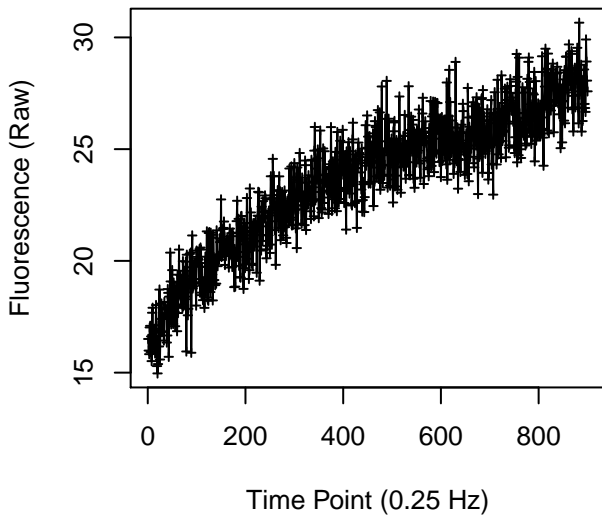

**Cell 686**

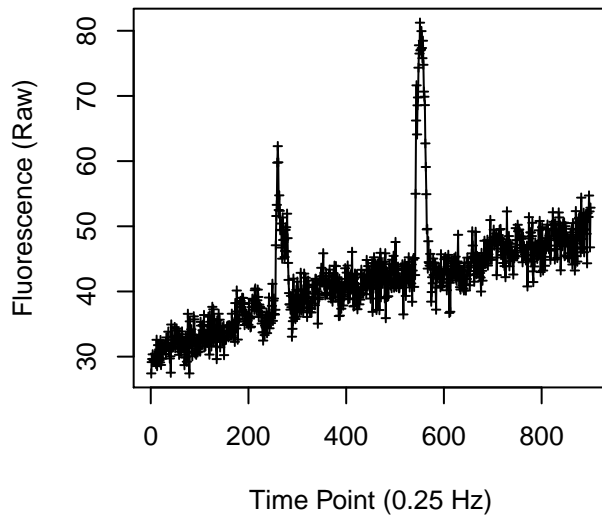

**Cell 687**

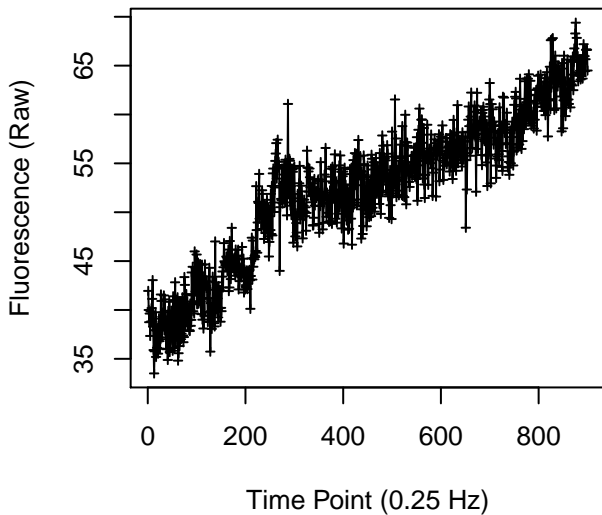

**Cell 688**

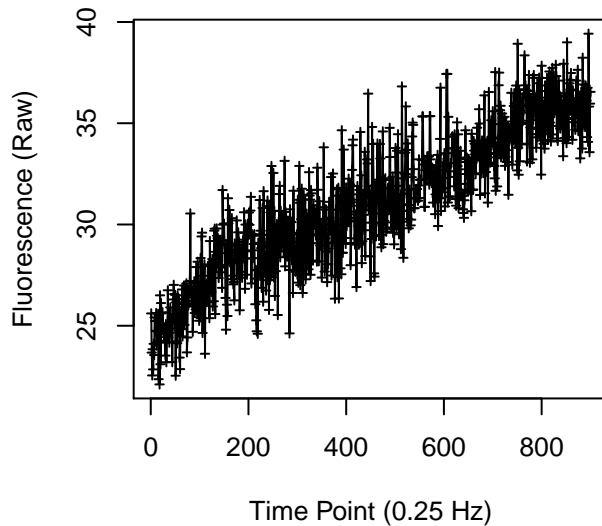

**Cell 689**

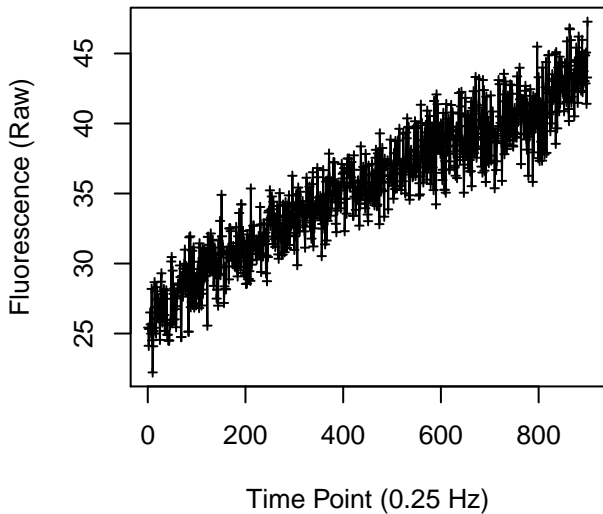

**Cell 690**

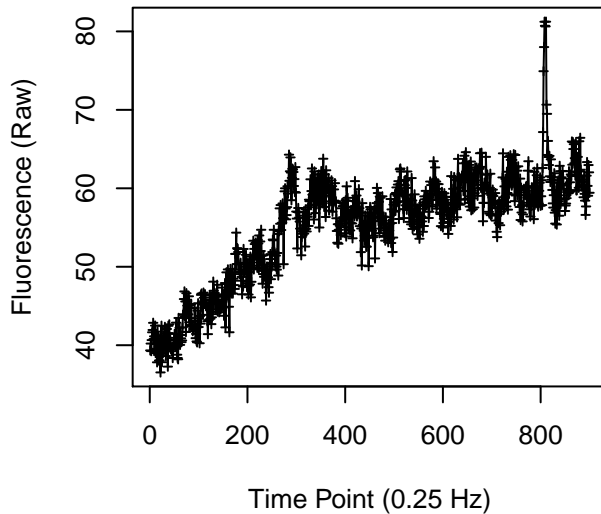

**Cell 691**

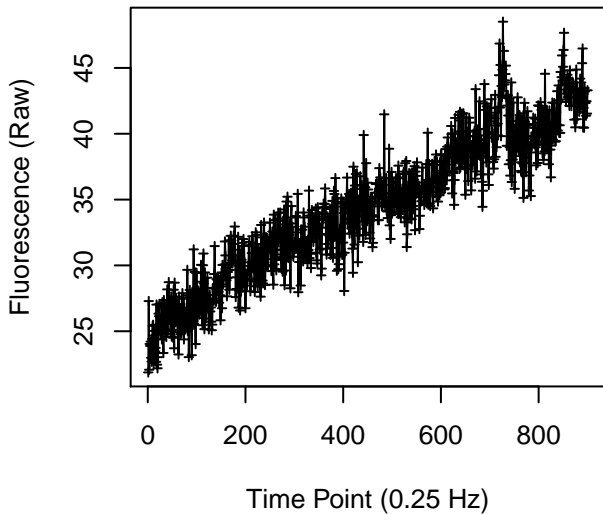

**Cell 692**

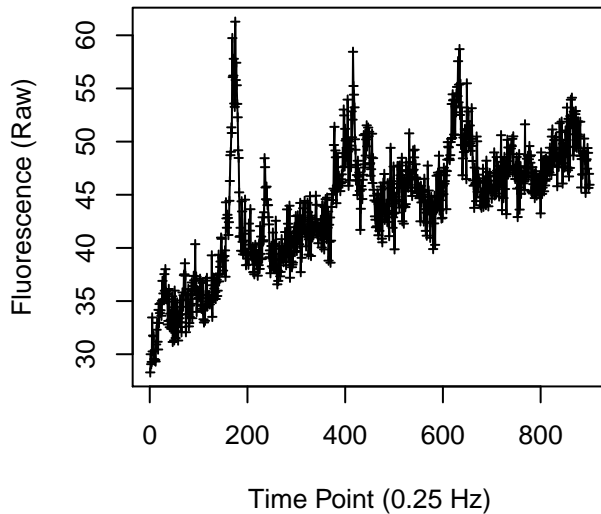

**Cell 693**

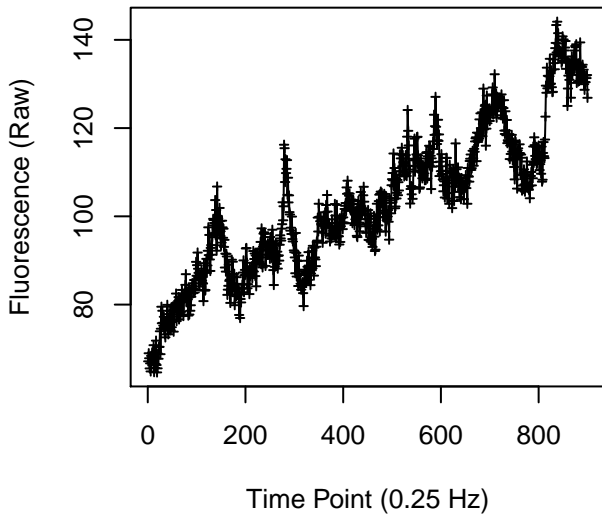

**Cell 694**

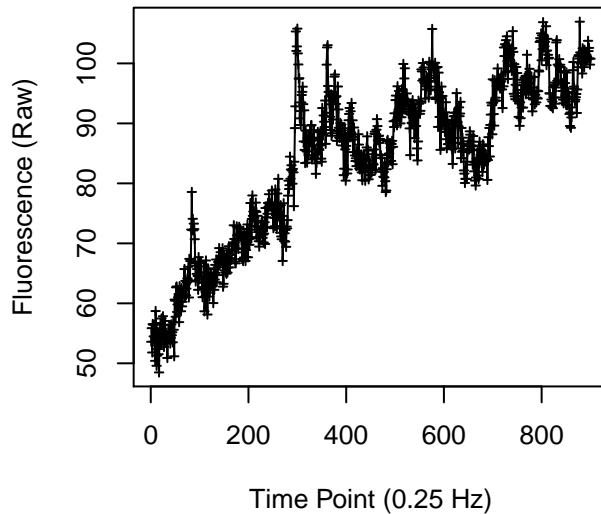

**Cell 695**

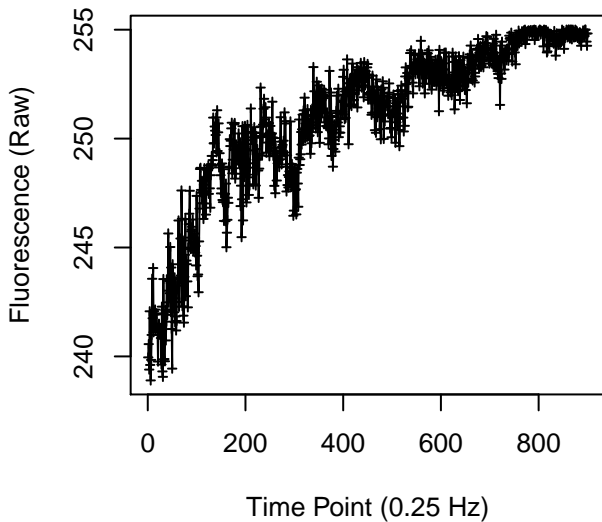

**Cell 696**

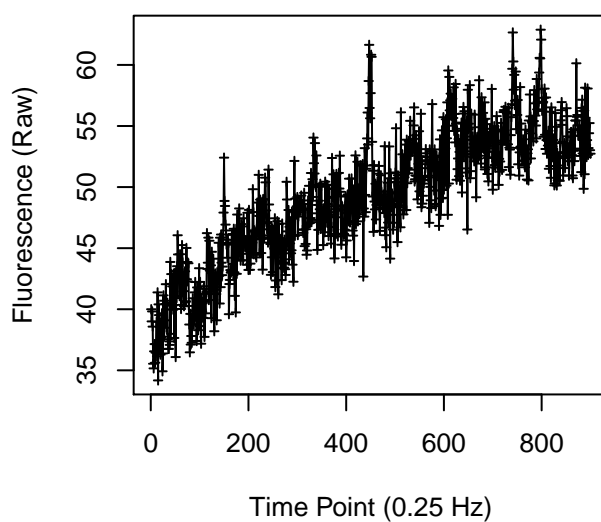

**Cell 697**

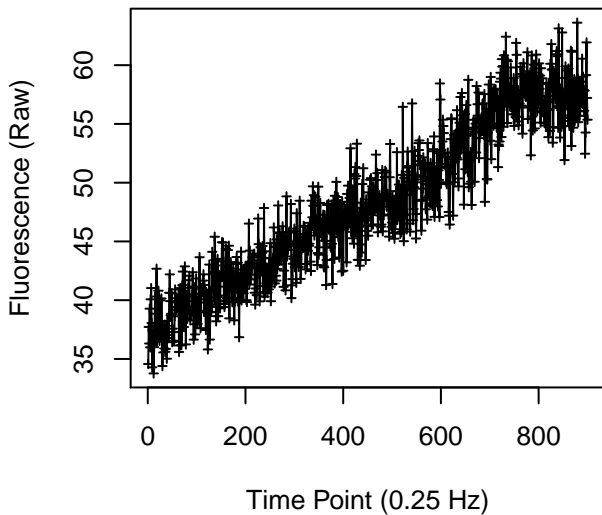

**Cell 698**

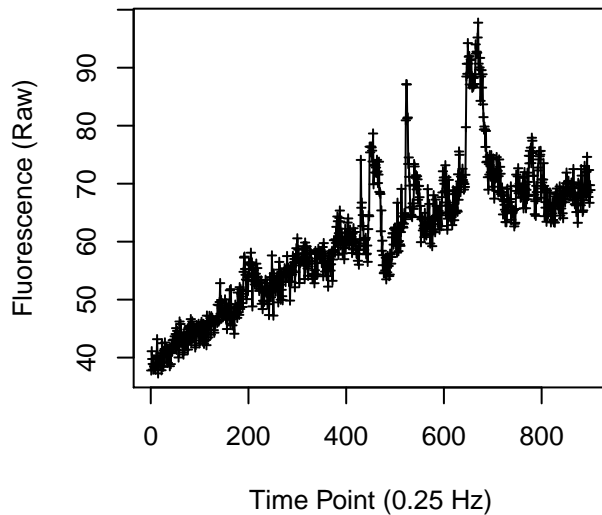

**Cell 699**

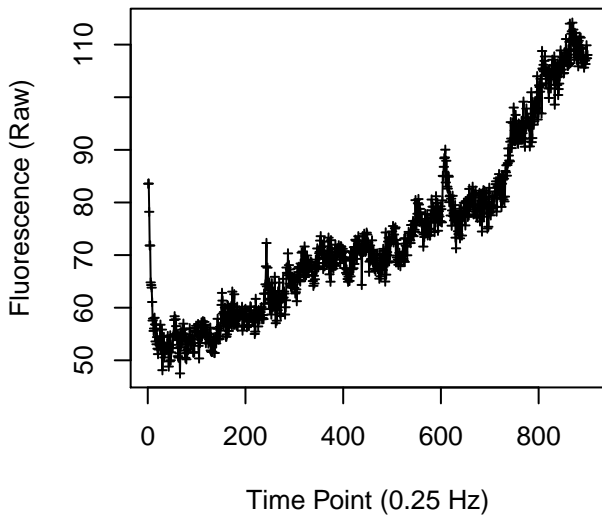

**Cell 700**

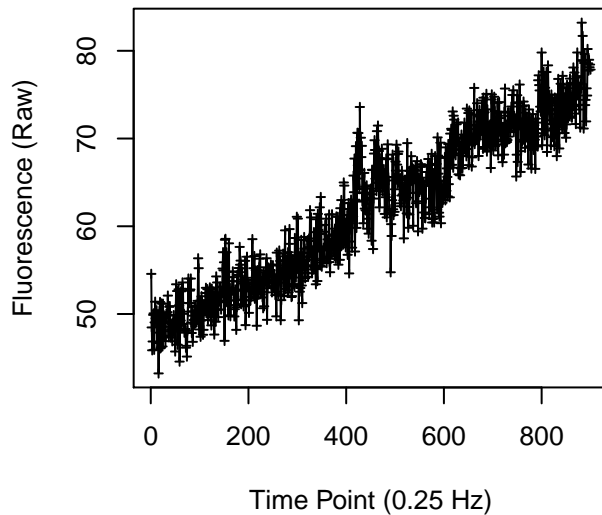

**Cell 701**

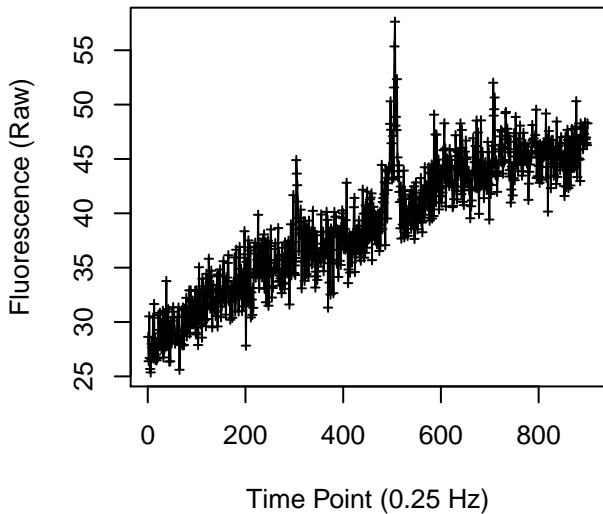

**Cell 702**

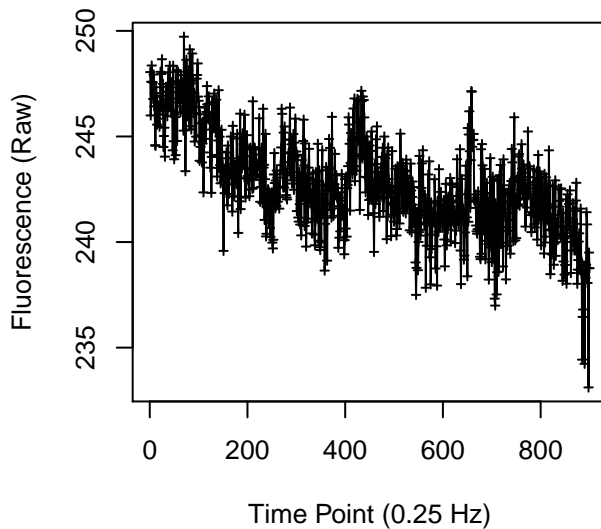

**Cell 703**

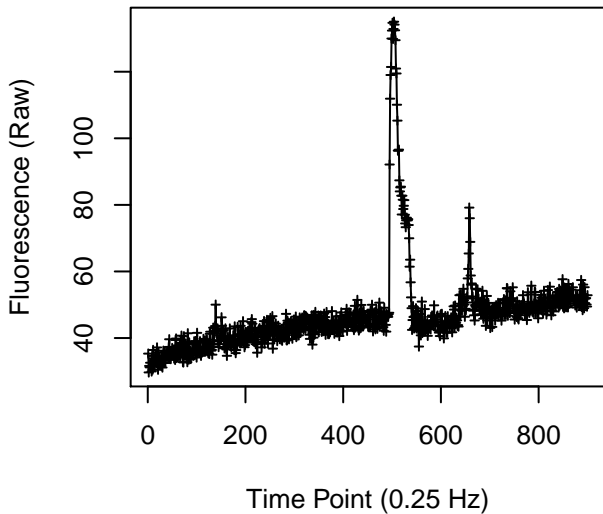

**Cell 704**

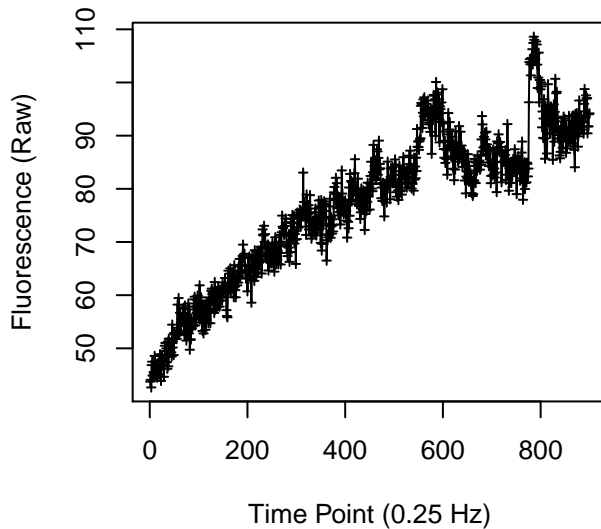

**Cell 705**

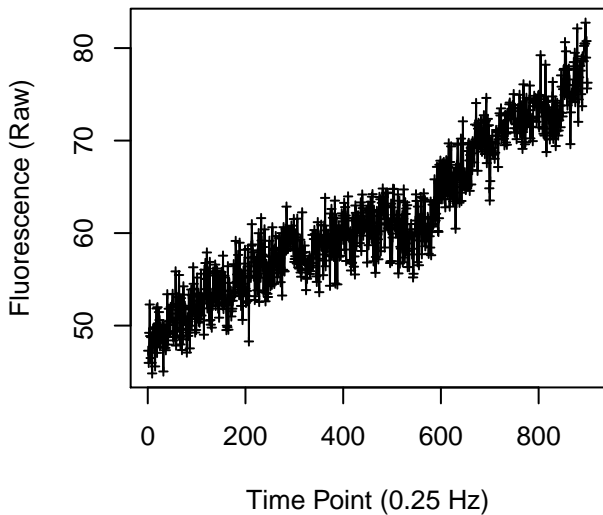

**Cell 706**

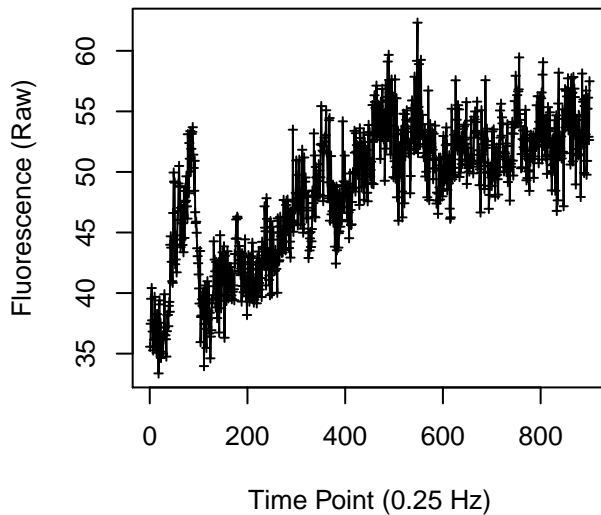

**Cell 707**

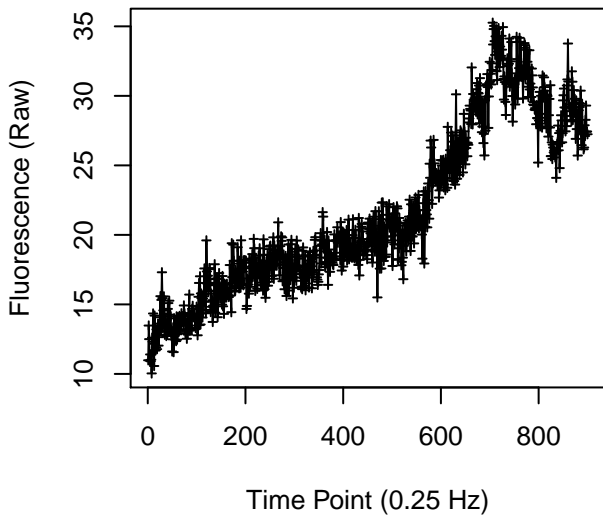

**Cell 708**

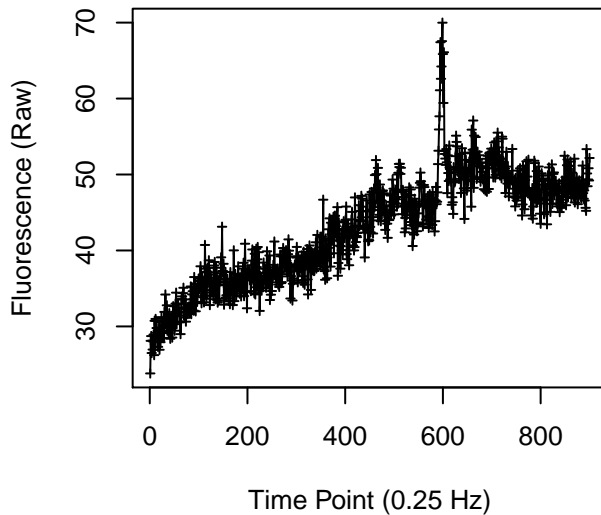

**Cell 709**

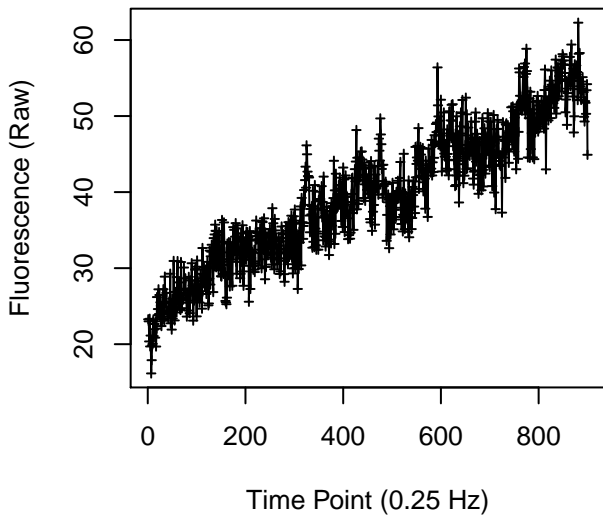

**Cell 710**

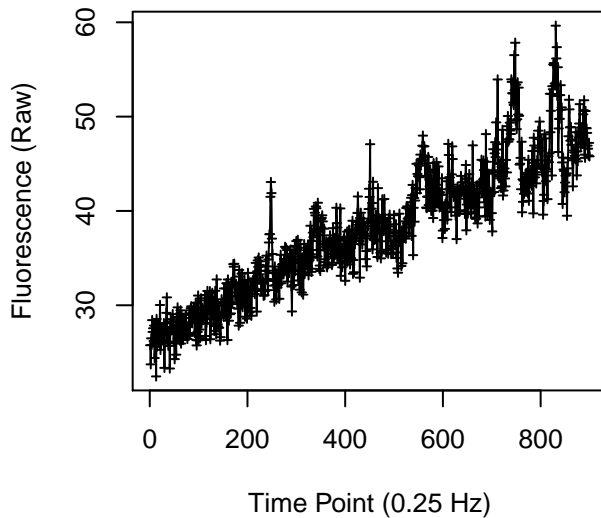

**Cell 711**

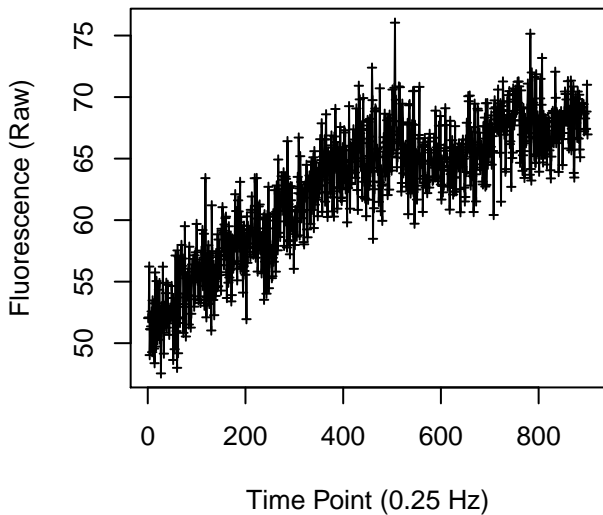

**Cell 712**

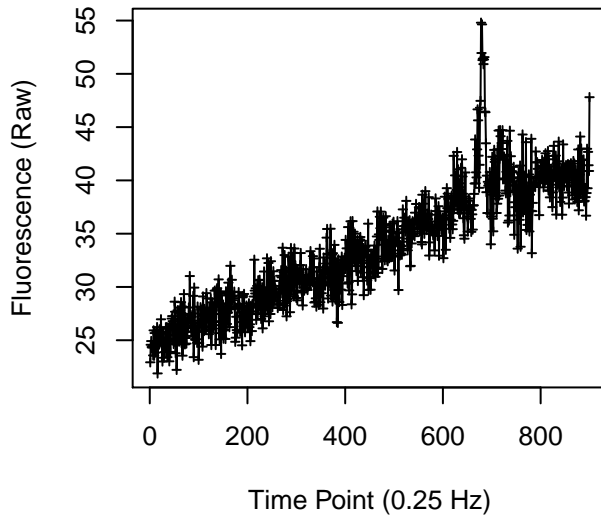



**Cell 713**

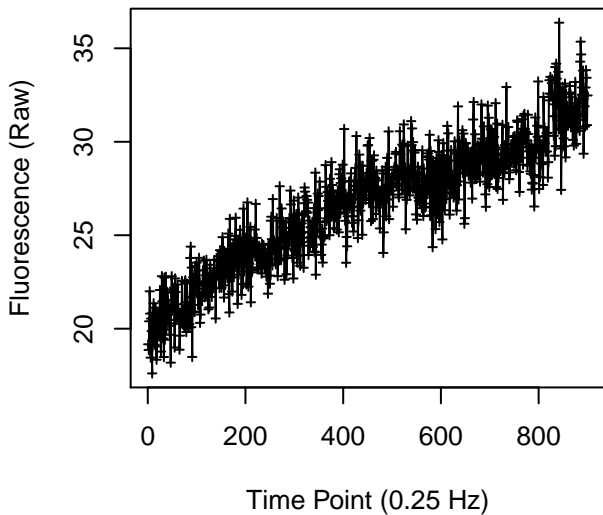

**Cell 714**

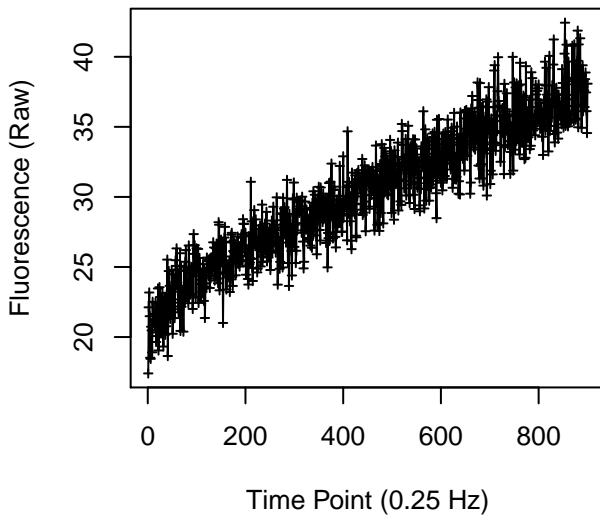

**Cell 715**

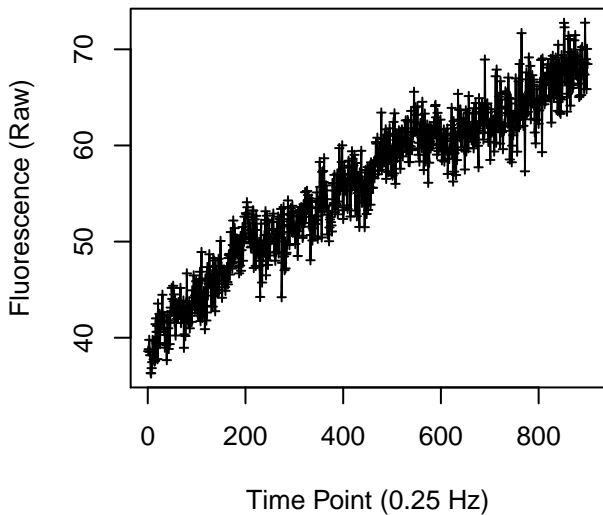

**Cell 716**

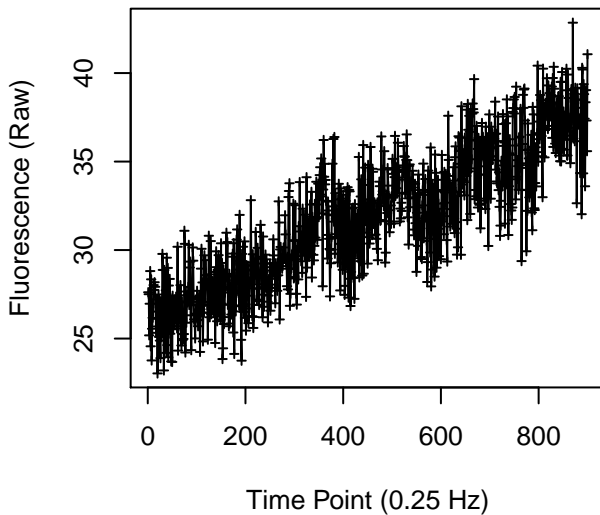

**Cell 717**

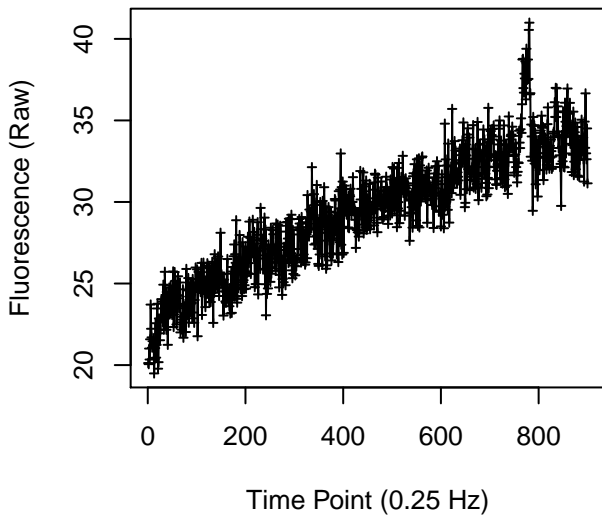

**Cell 718**

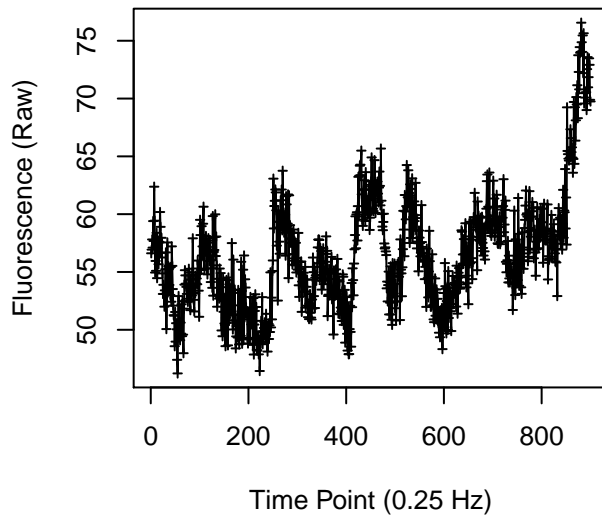

**Cell 719**

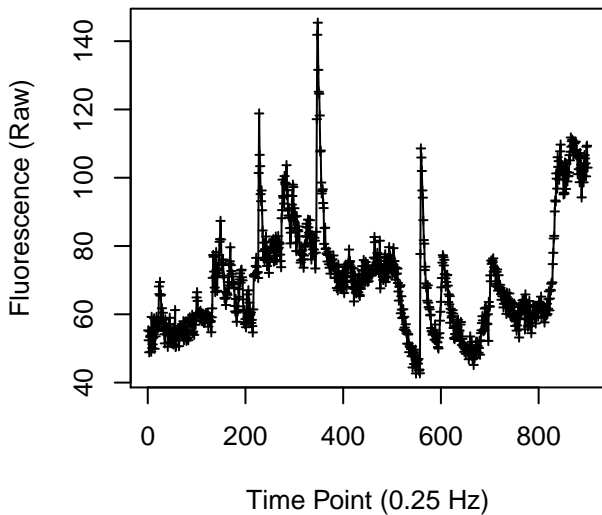

**Cell 720**

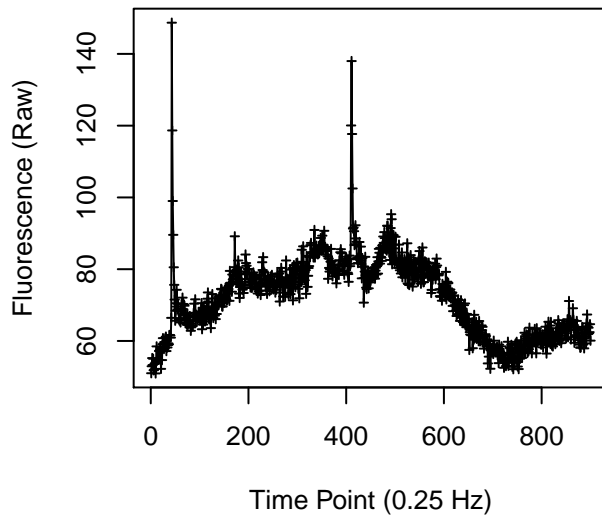

**Cell 721**

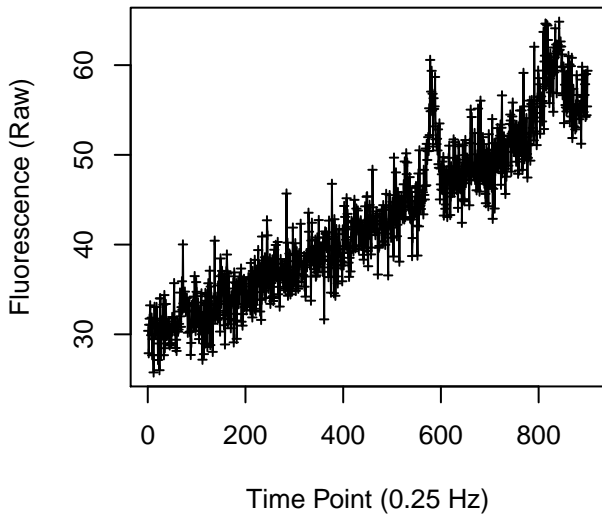

**Cell 722**

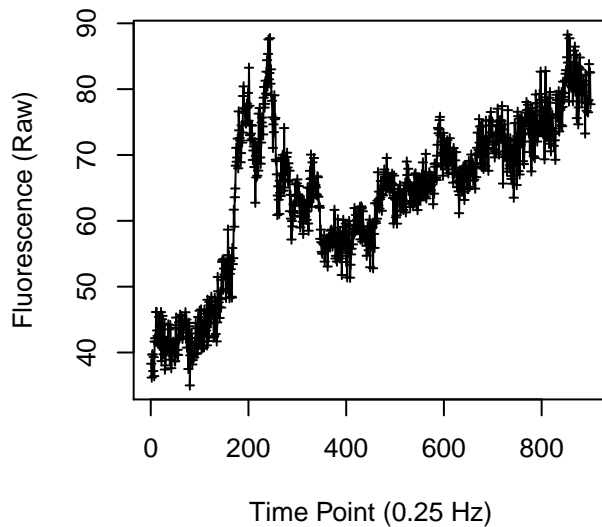

**Cell 723**

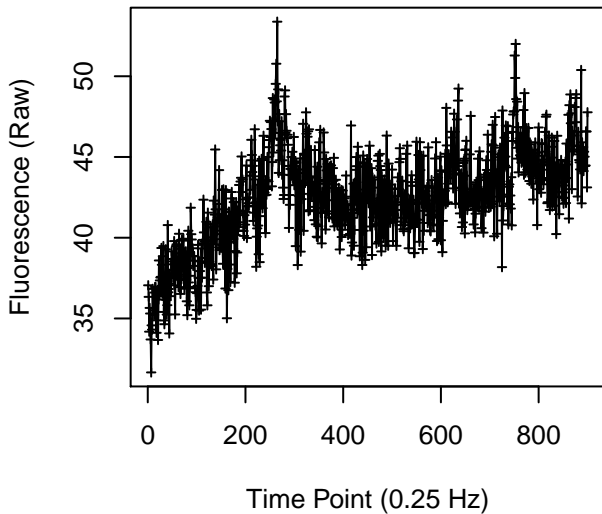

**Cell 724**

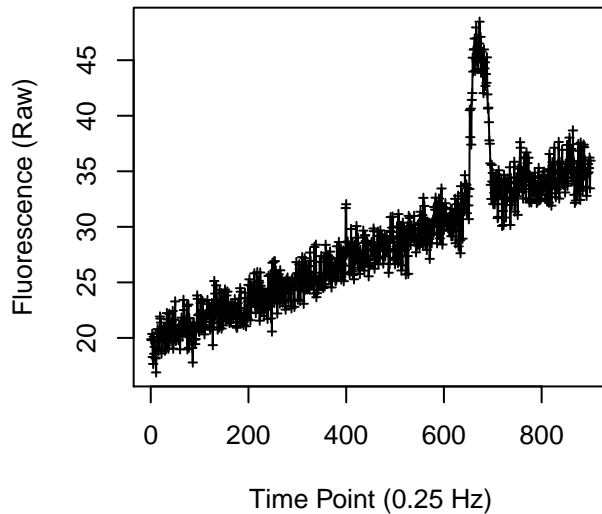

**Cell 725**

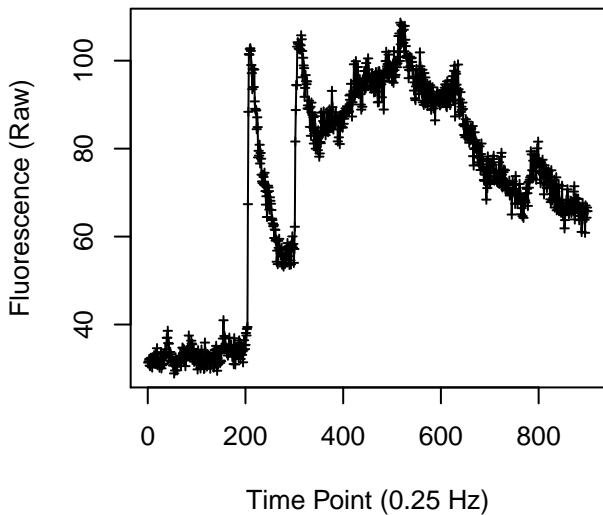

**Cell 726**

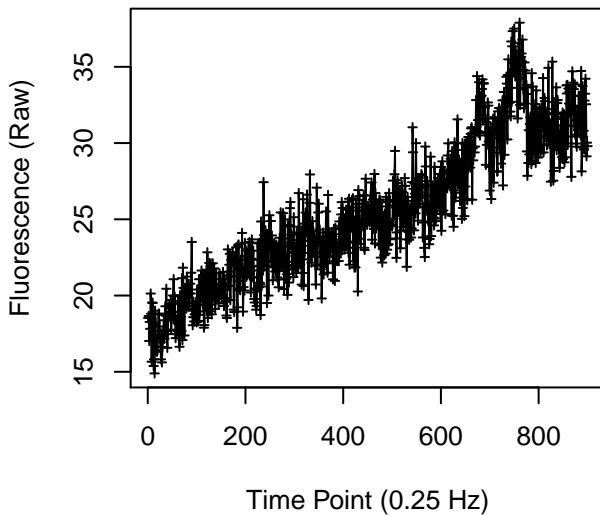

**Cell 727**

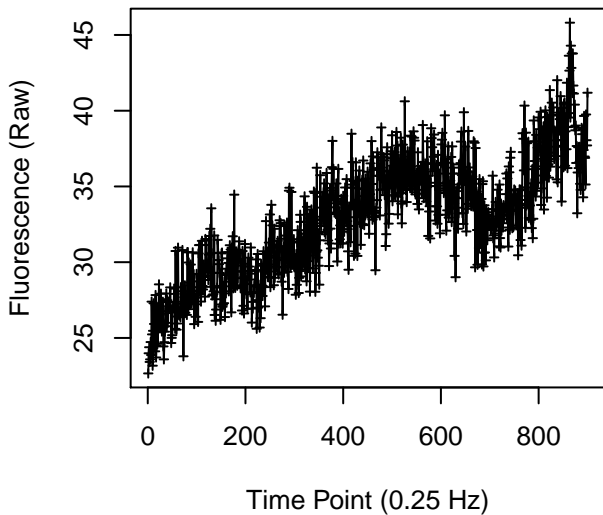

**Cell 728**

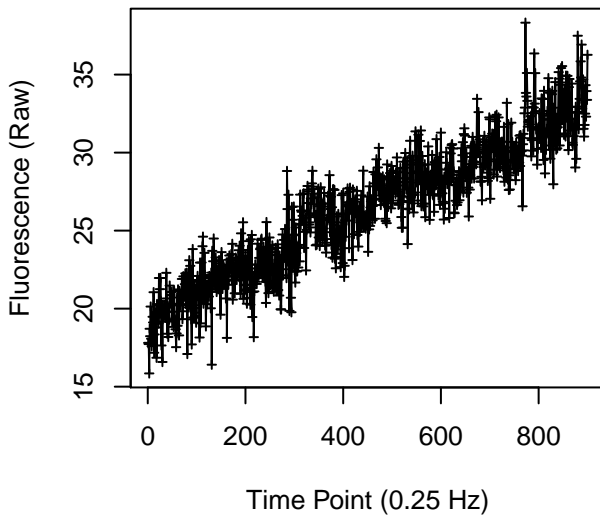

**Cell 729**

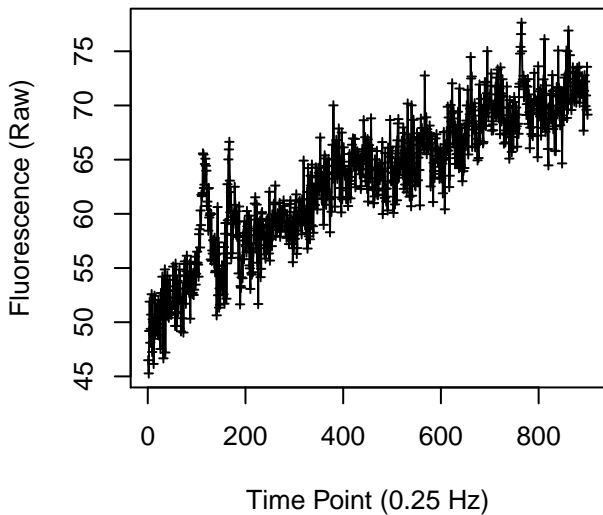

**Cell 730**

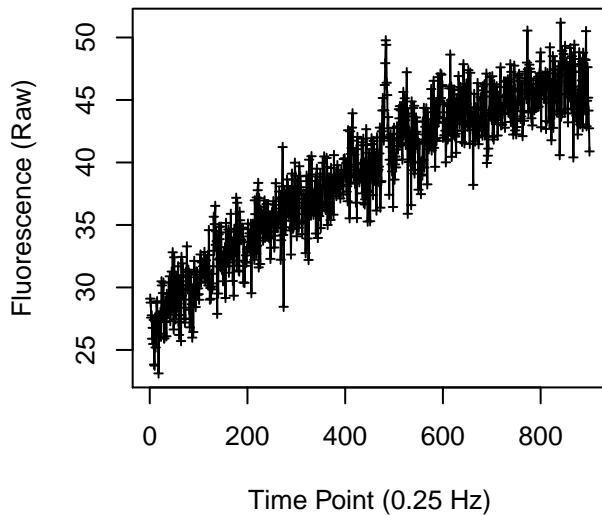

**Cell 731**

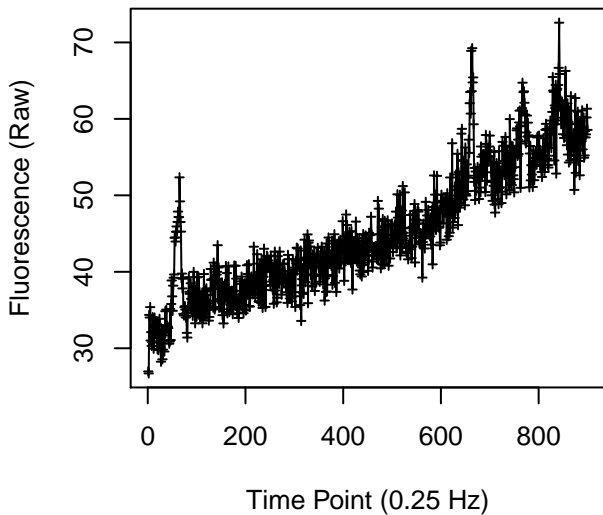

**Cell 732**

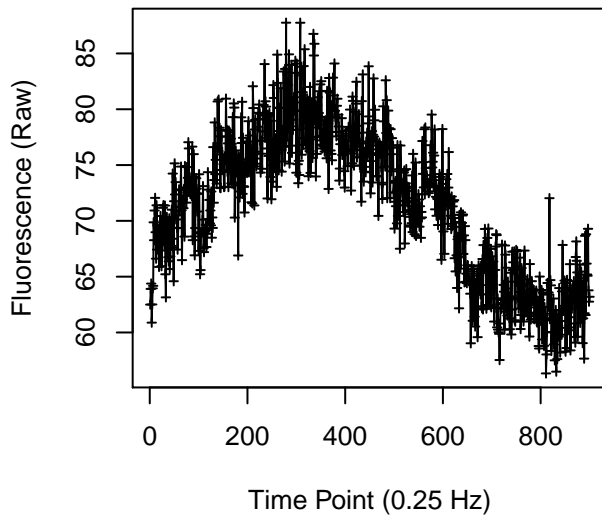

**Cell 733**

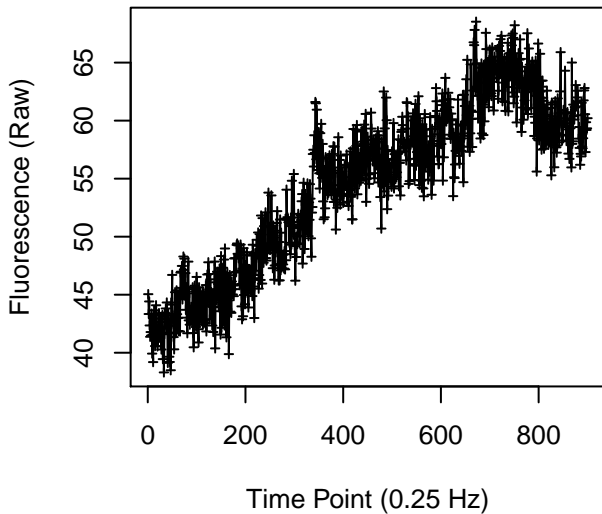

**Cell 734**

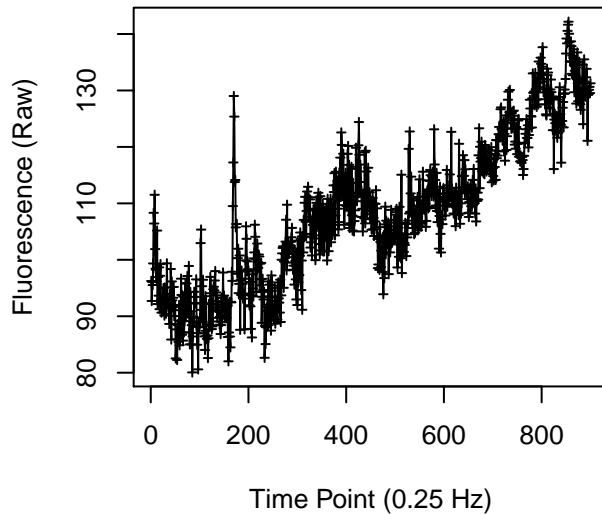

**Cell 735**

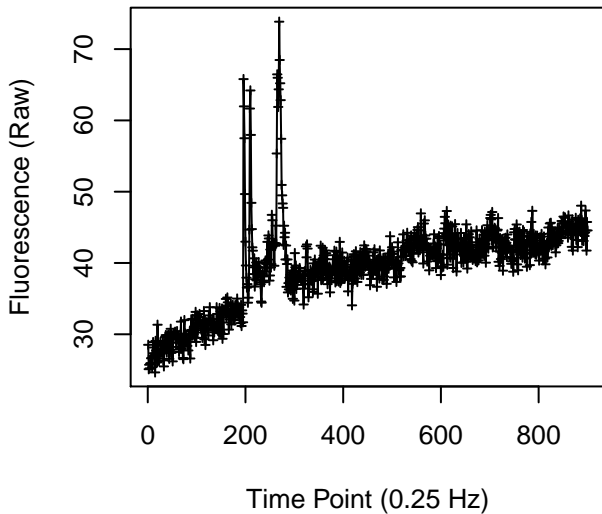

**Cell 736**

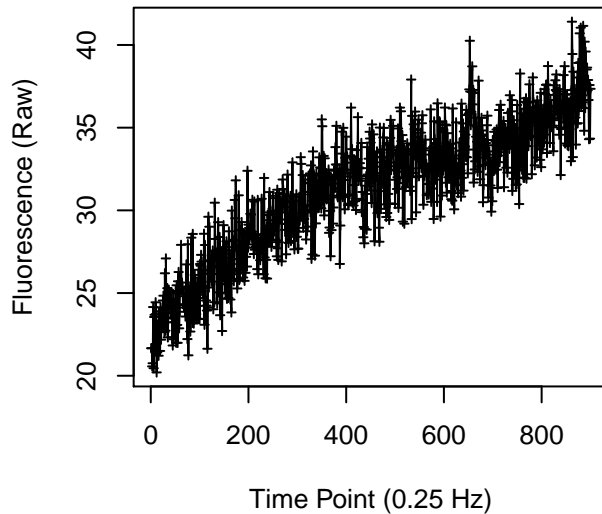

**Cell 737**

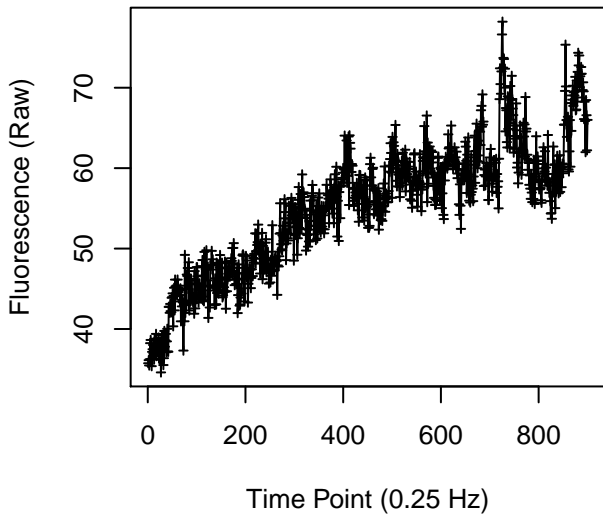

**Cell 738**

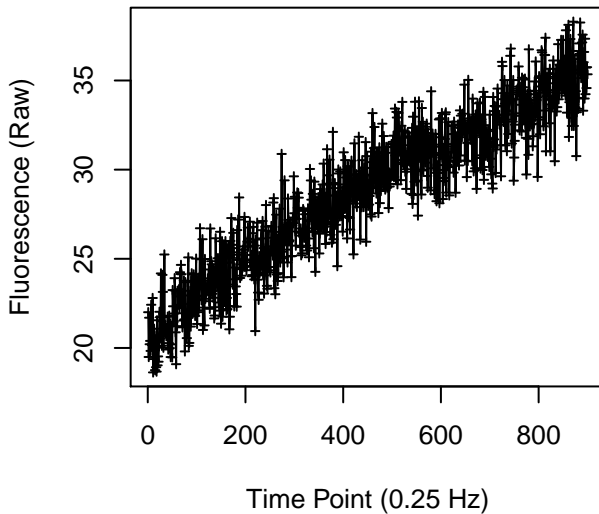

**Cell 739**

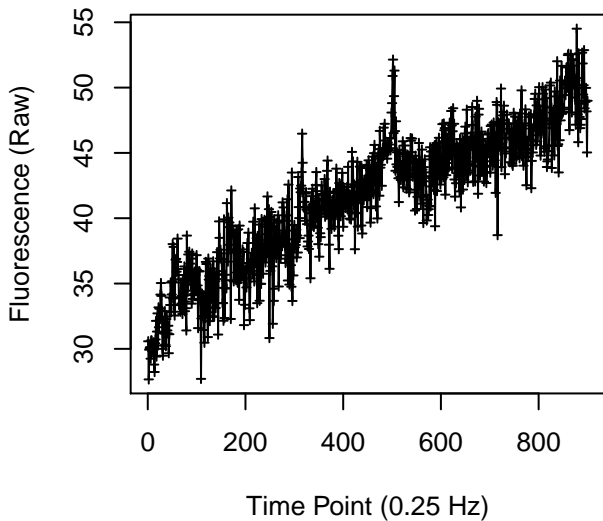

**Cell 740**

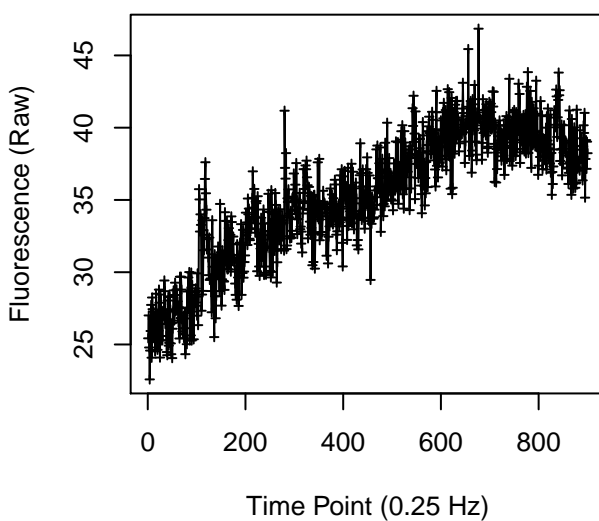

**Cell 741**

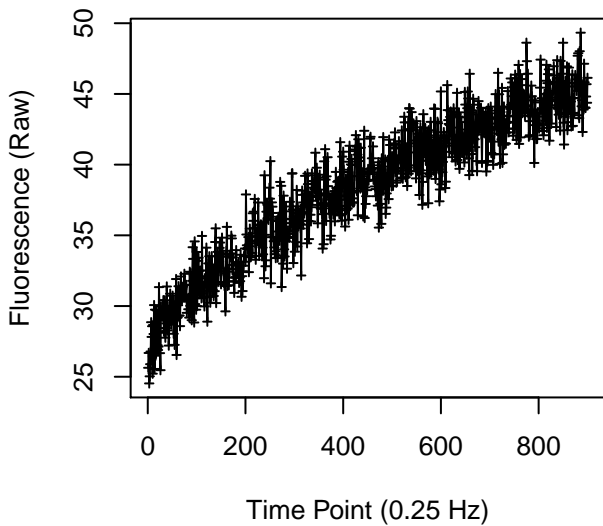

**Cell 742**

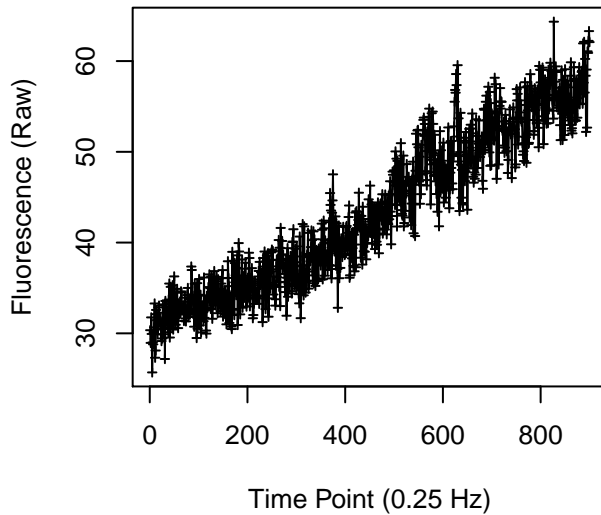

**Cell 743**

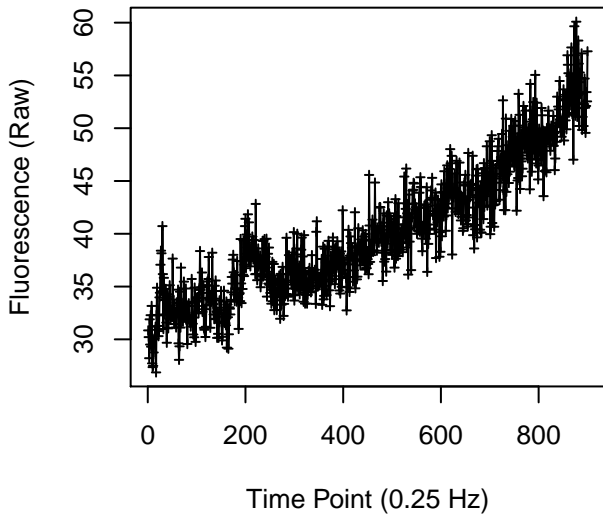

**Cell 744**

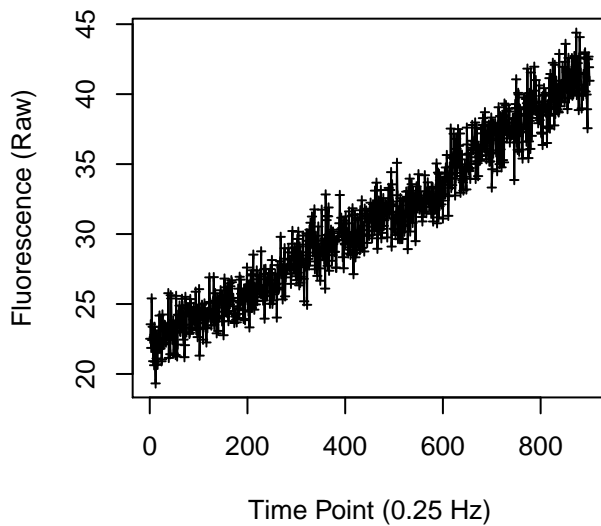



**Cell 745**

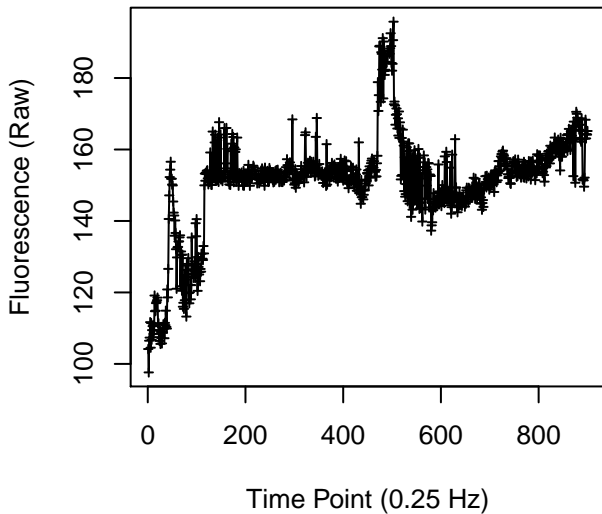

**Cell 746**

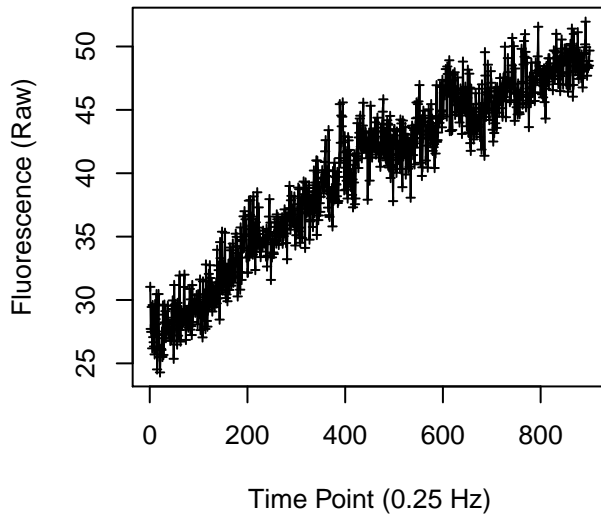

**Cell 747**

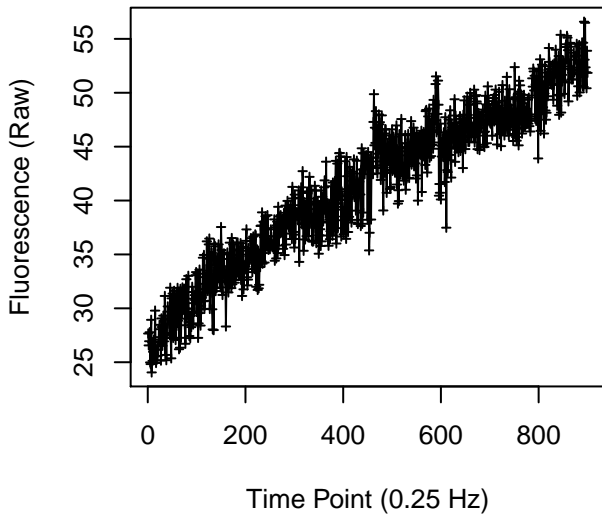

**Cell 748**

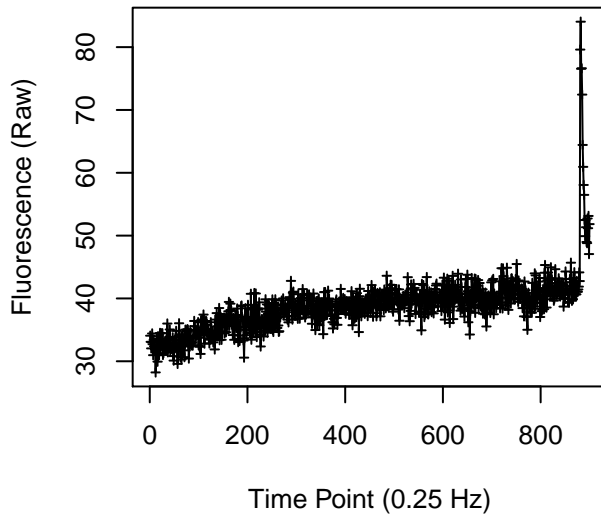

**Cell 749**

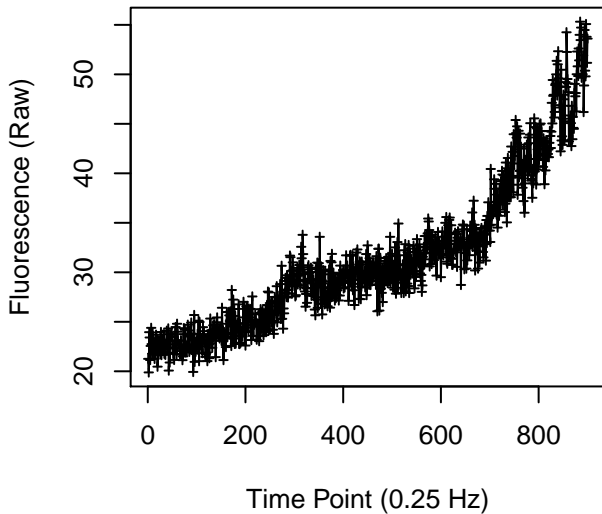

**Cell 750**

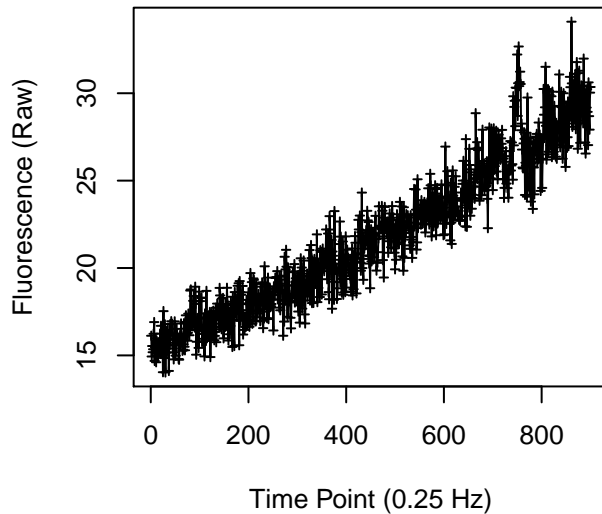

**Cell 751**

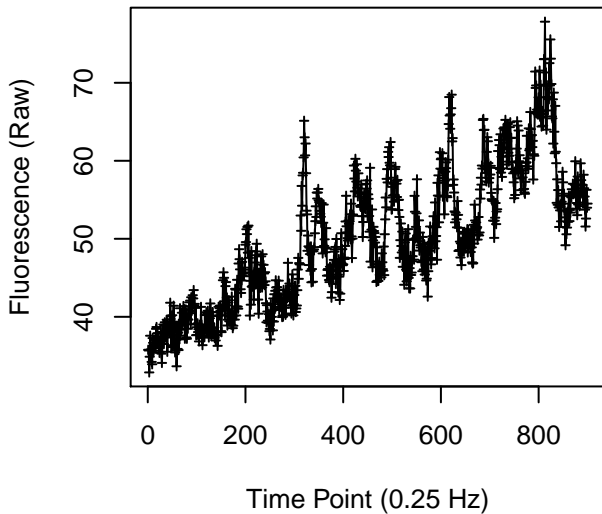

**Cell 752**

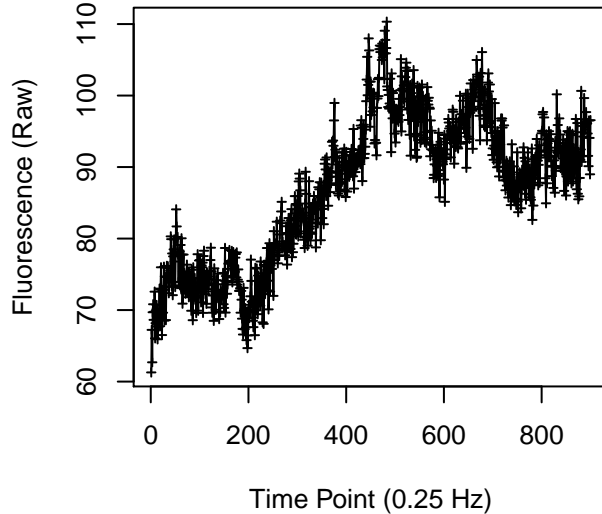

**Cell 753**

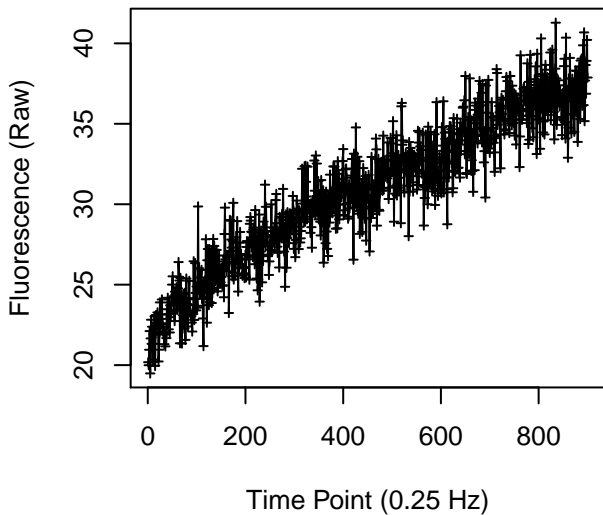

**Cell 754**

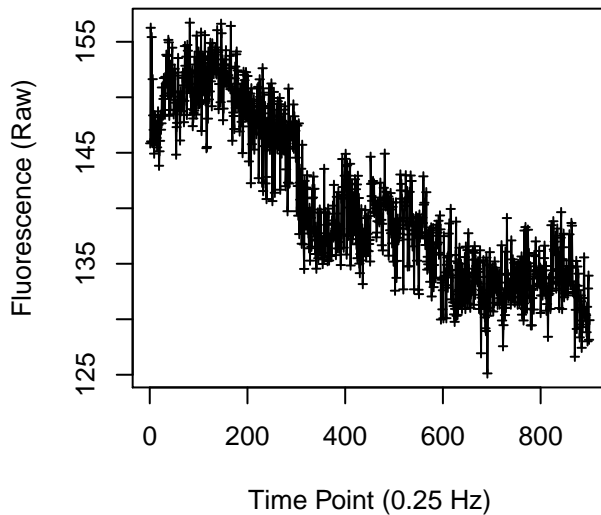

**Cell 755**

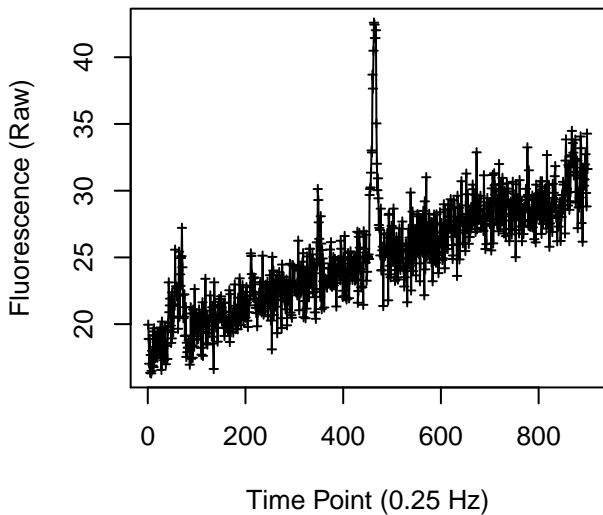

**Cell 756**

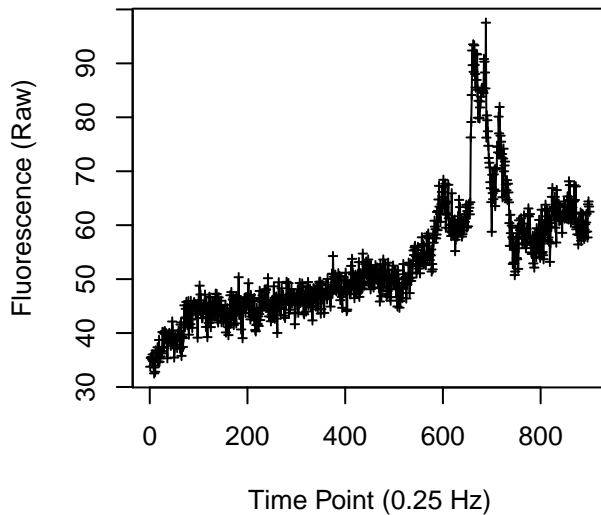

**Cell 757**

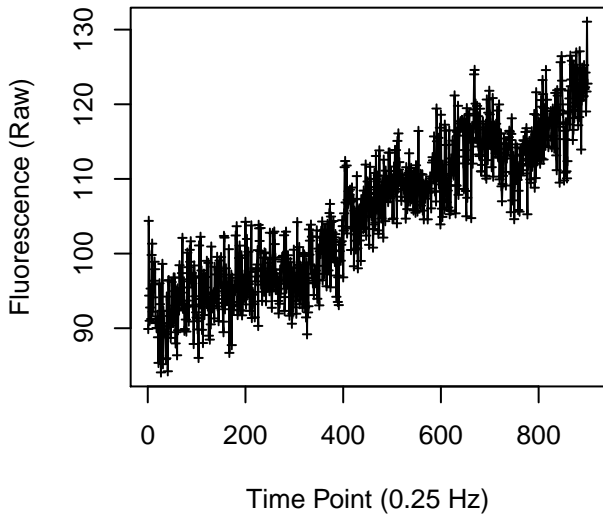

**Cell 758**

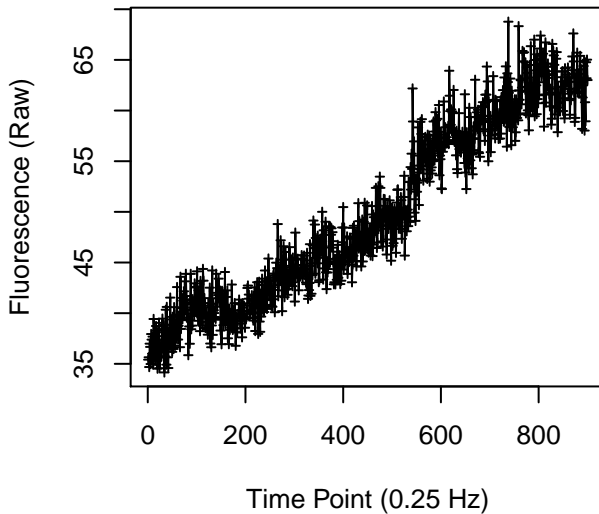

**Cell 759**

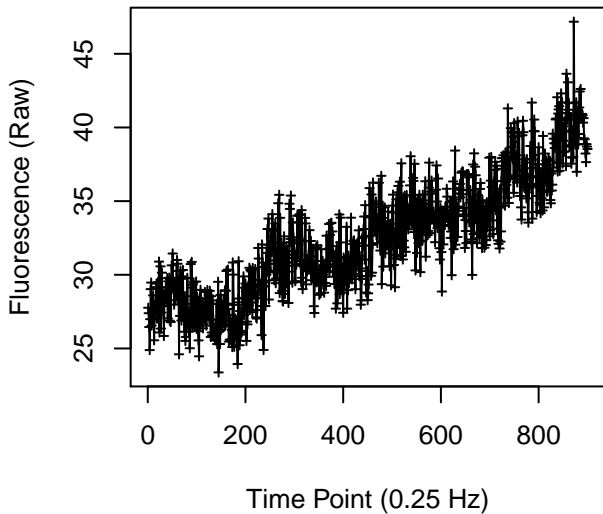

**Cell 760**

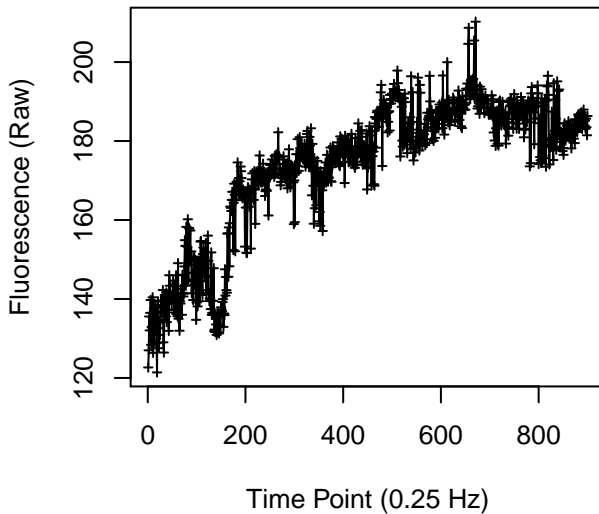

**Cell 761**

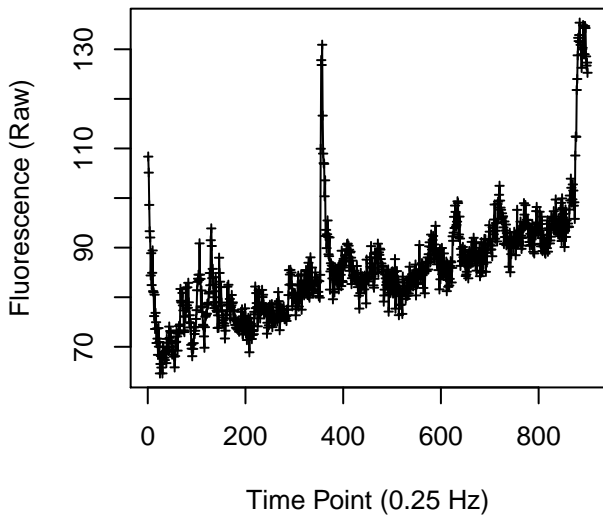

**Cell 762**

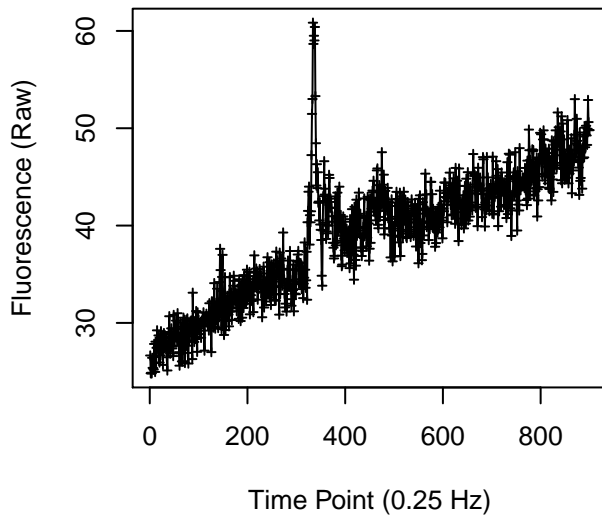

**Cell 763**

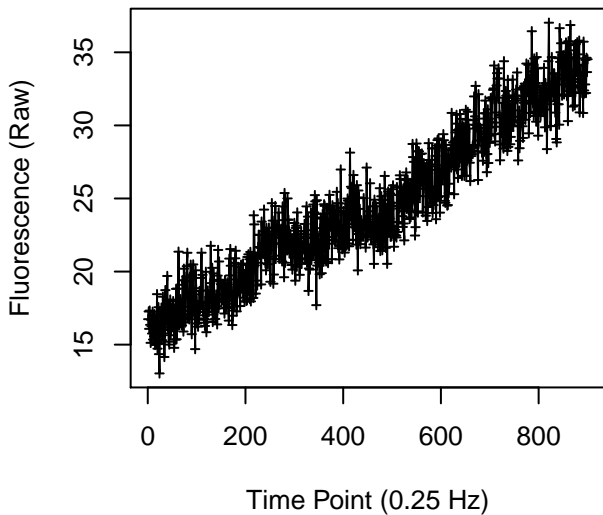

**Cell 764**

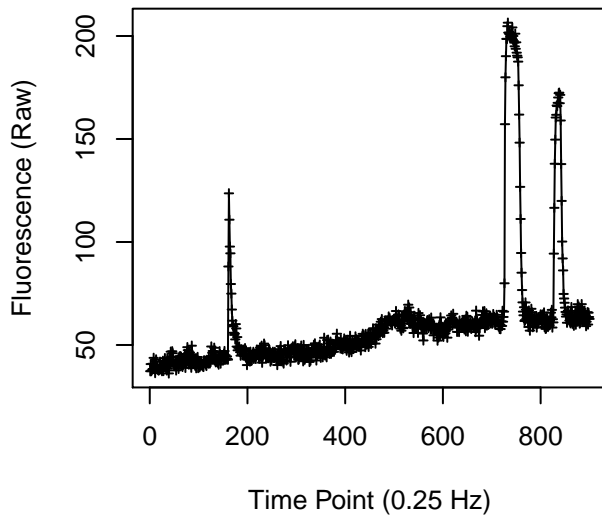

**Cell 765**

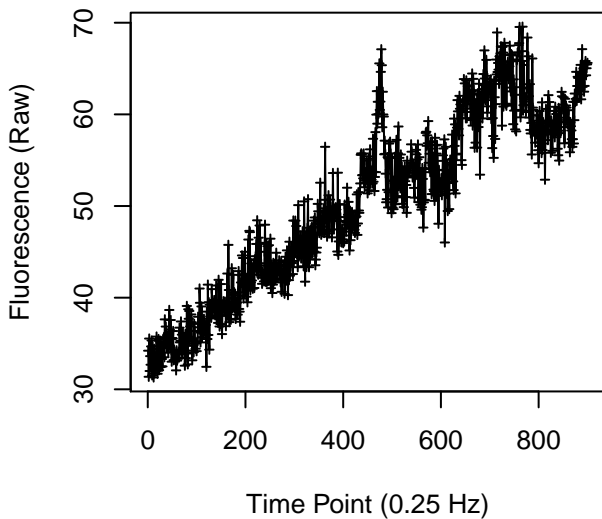

**Cell 766**

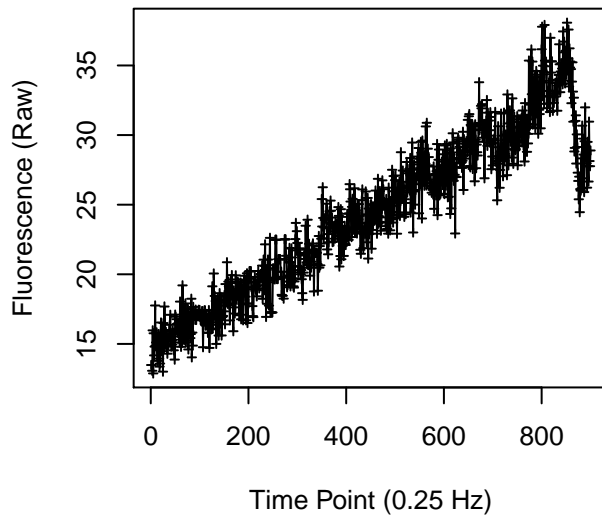

**Cell 767**

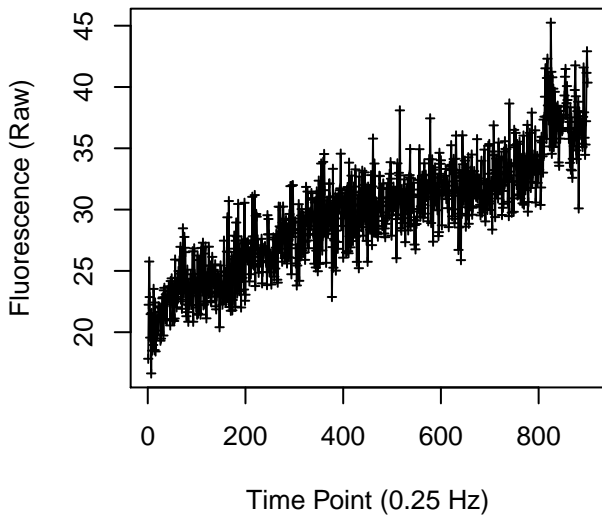

**Cell 768**

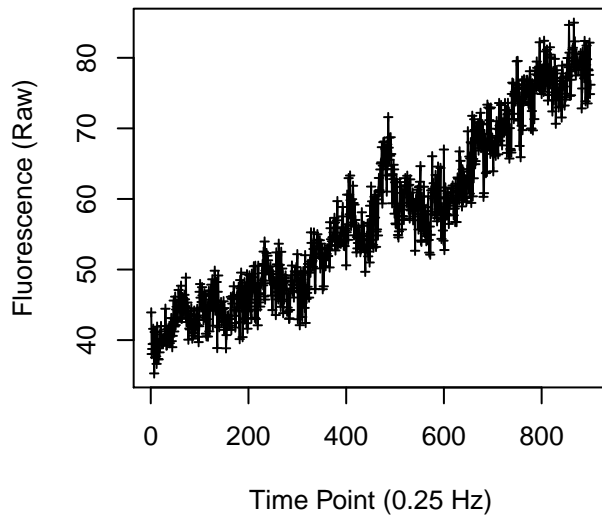

**Cell 769**

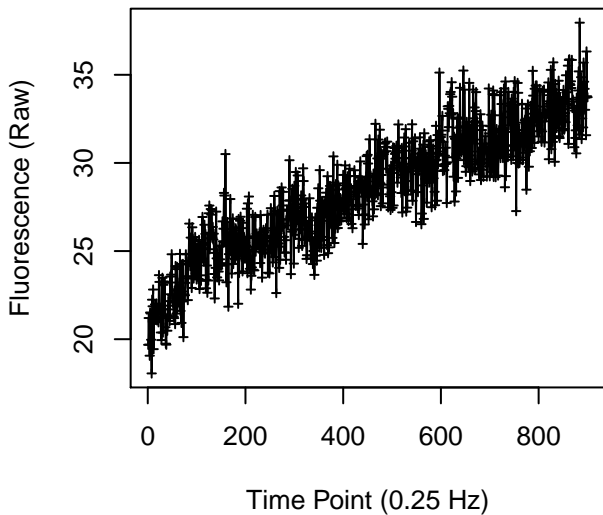

**Cell 770**

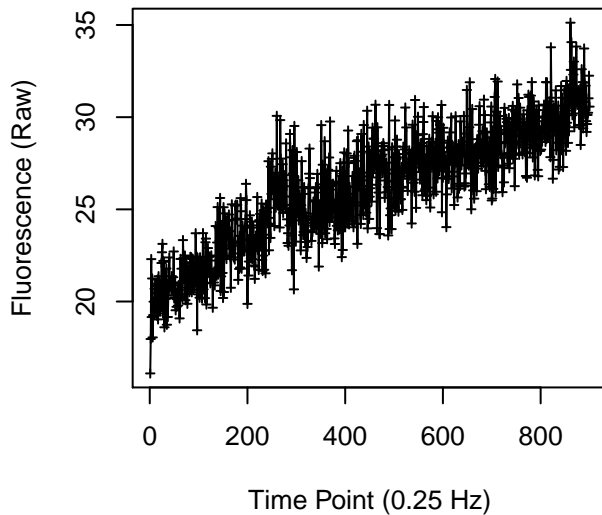

**Cell 771**

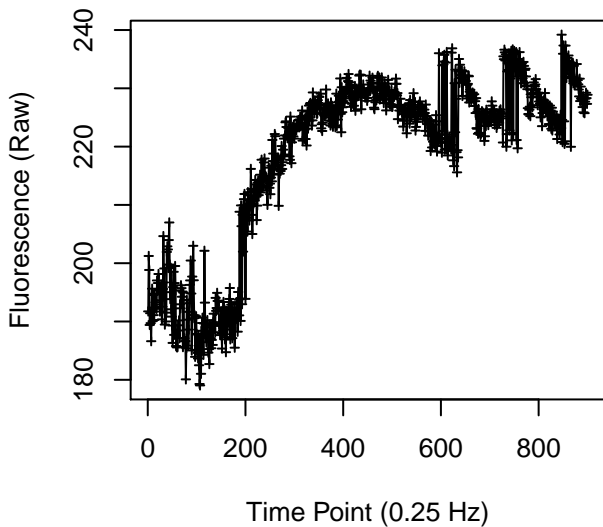

**Cell 772**

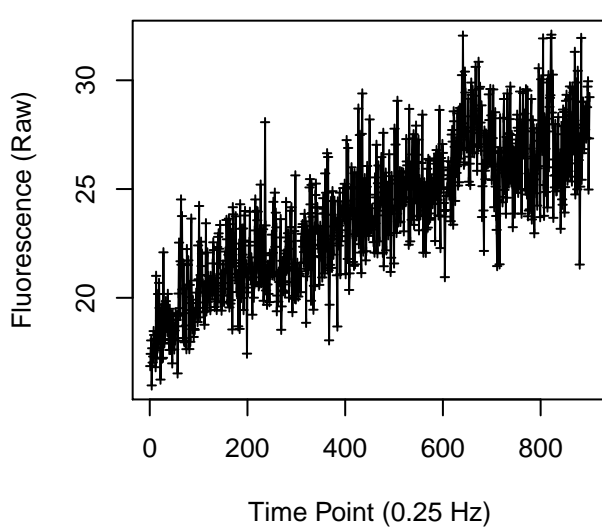

**Cell 773**

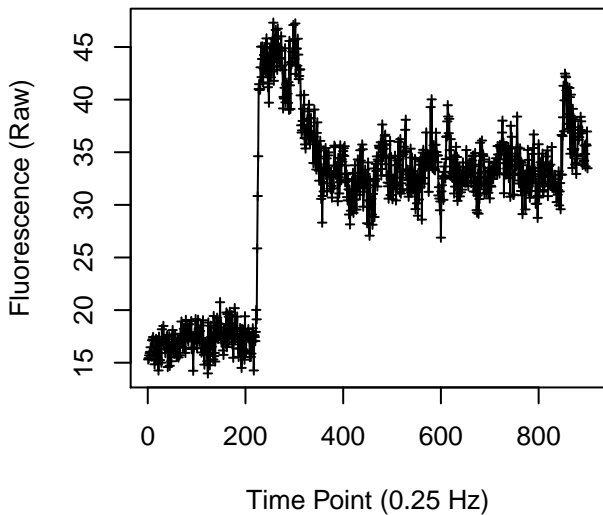

**Cell 774**

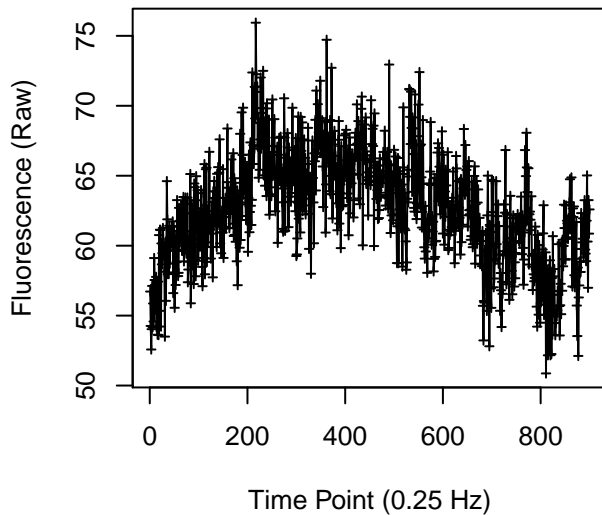

**Cell 775**

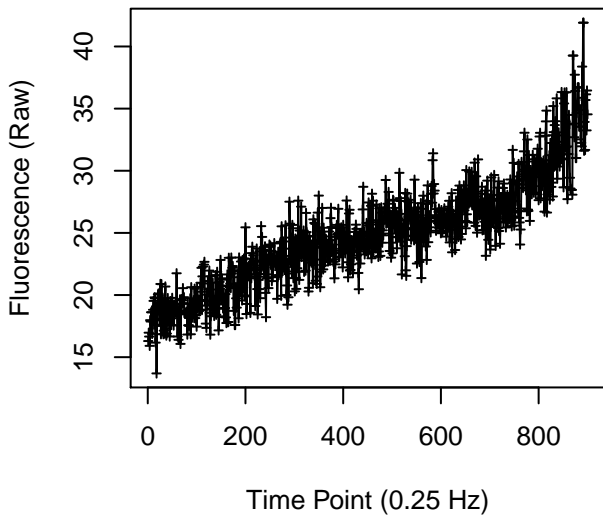

**Cell 776**

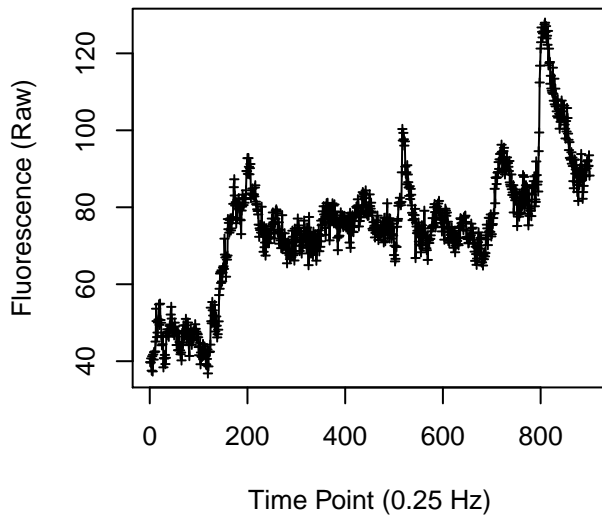



**Cell 777**

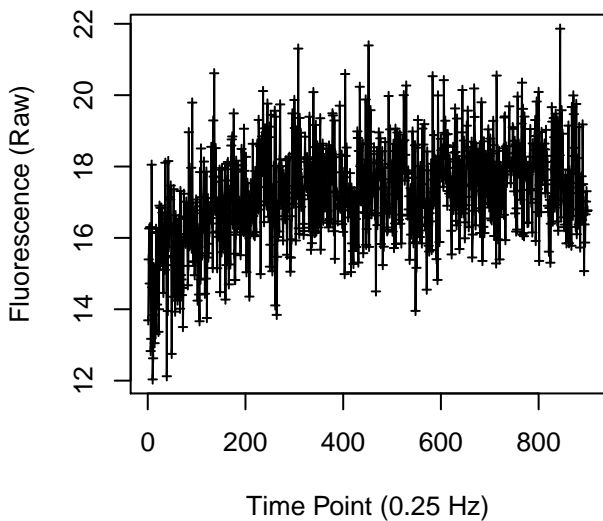

**Cell 778**

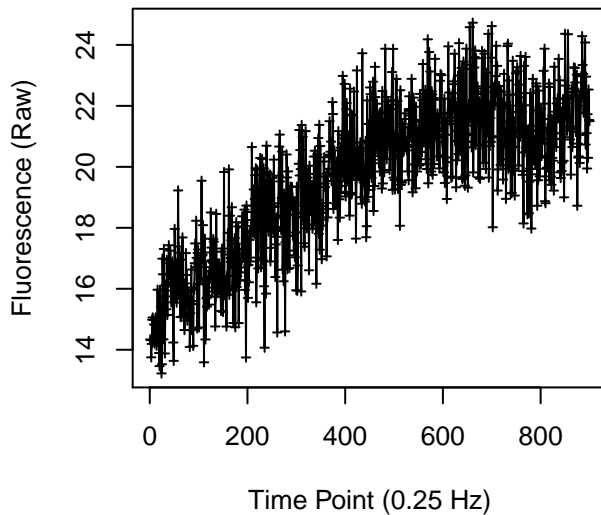

**Cell 779**

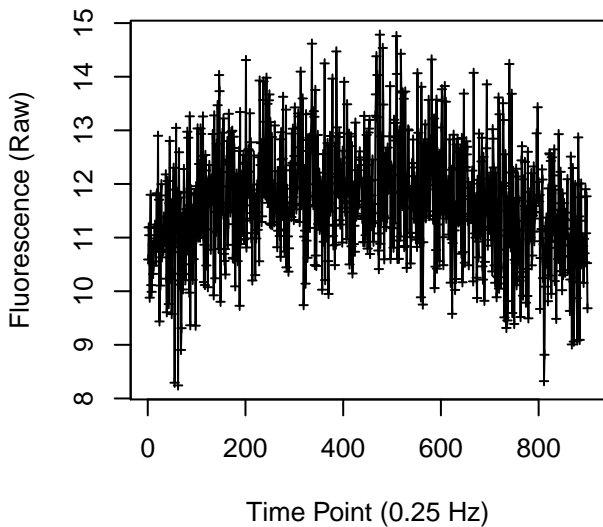

**Cell 780**

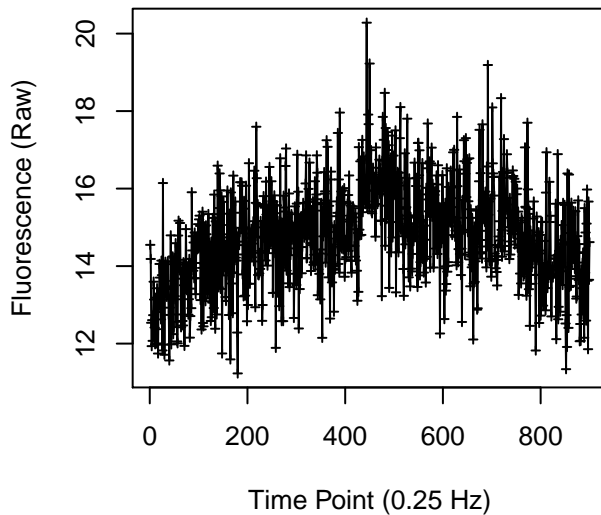

**Cell 781**

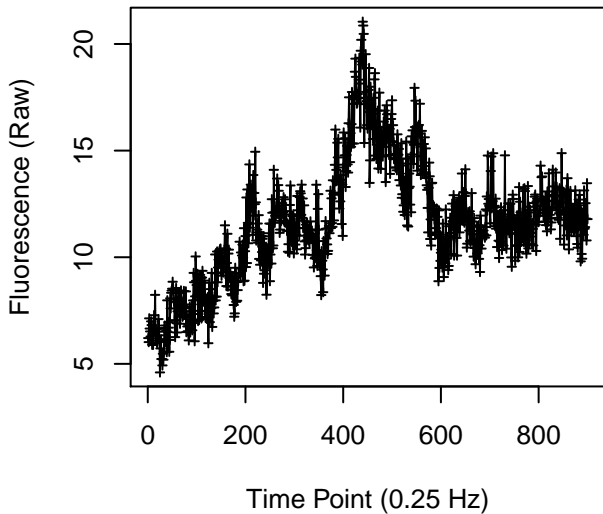

**Cell 782**

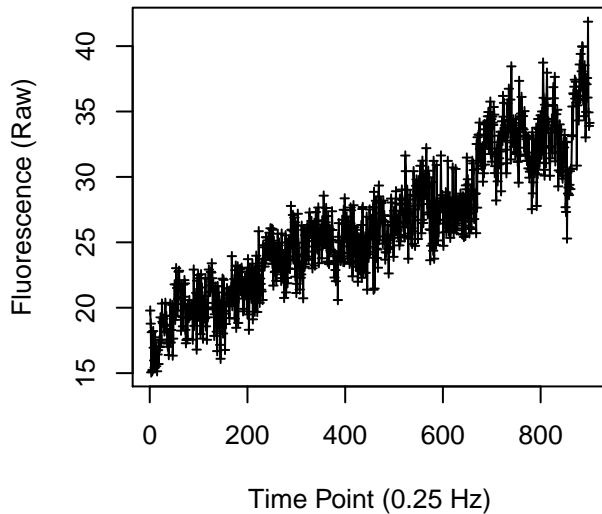

**Cell 783**

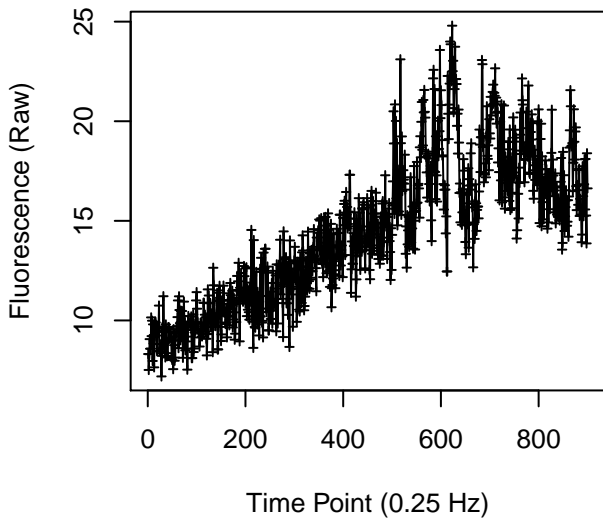

**Cell 784**

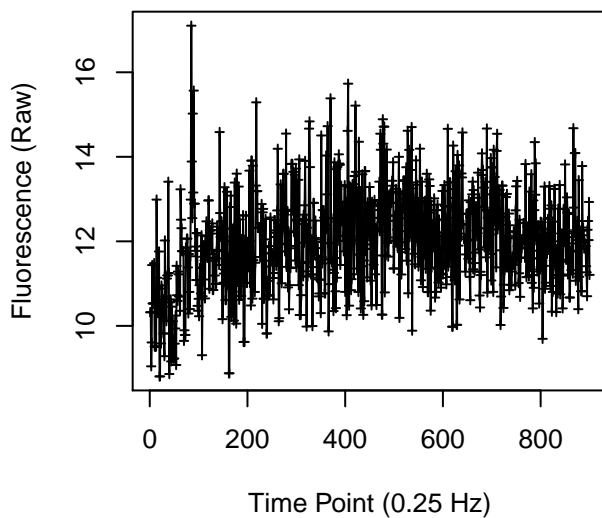

**Cell 785**

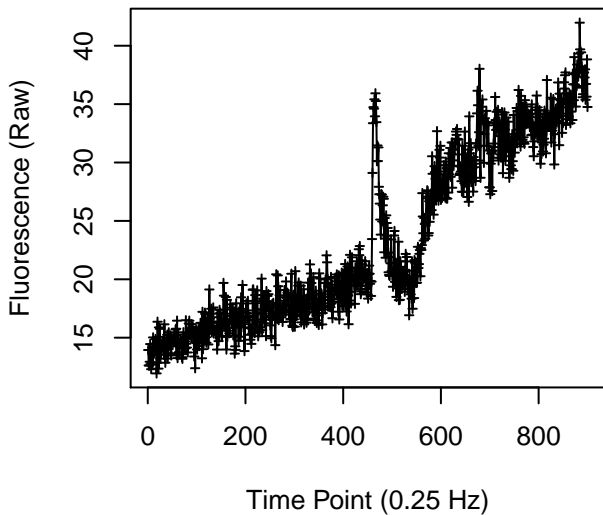

**Cell 786**

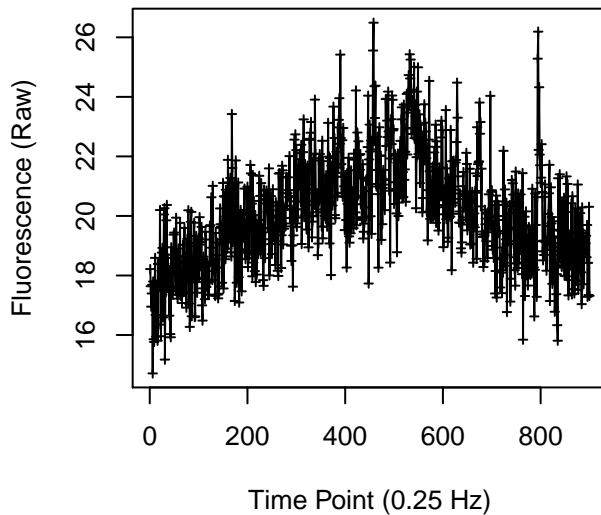

**Cell 787**

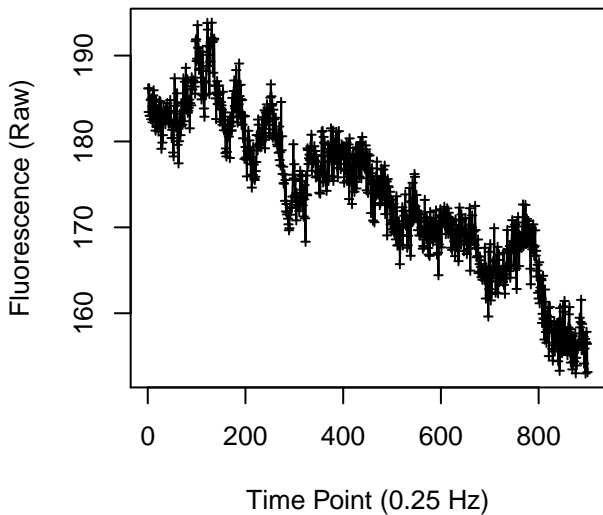

**Cell 788**

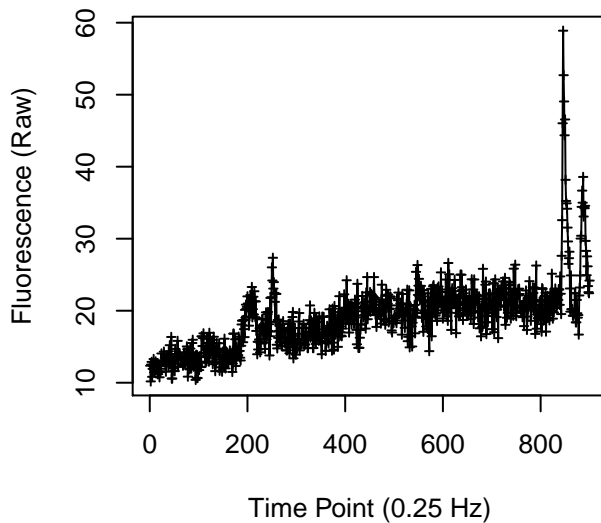

**Cell 789**

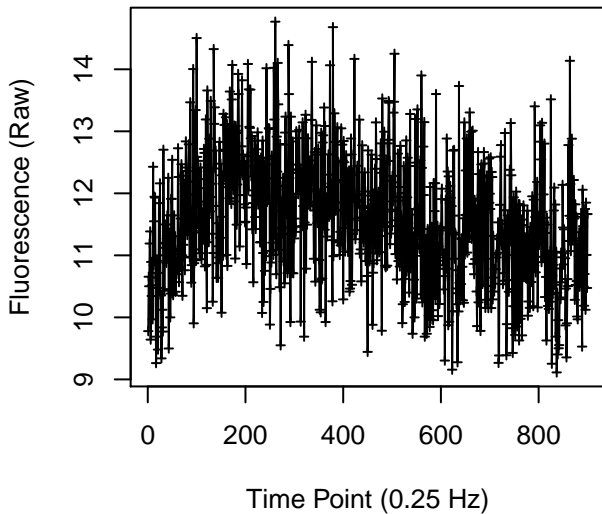

**Cell 790**

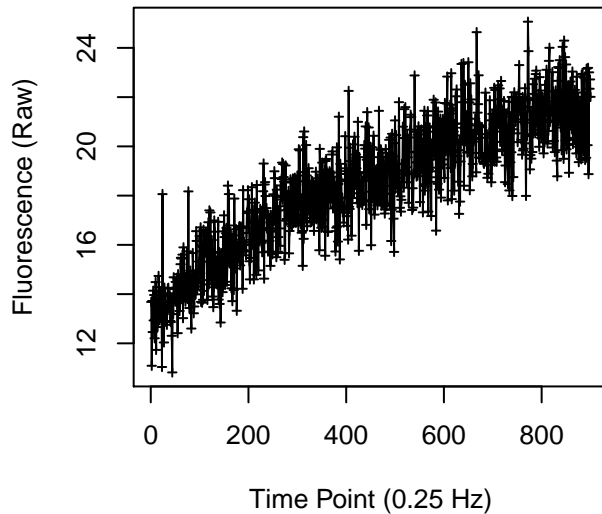

**Cell 791**

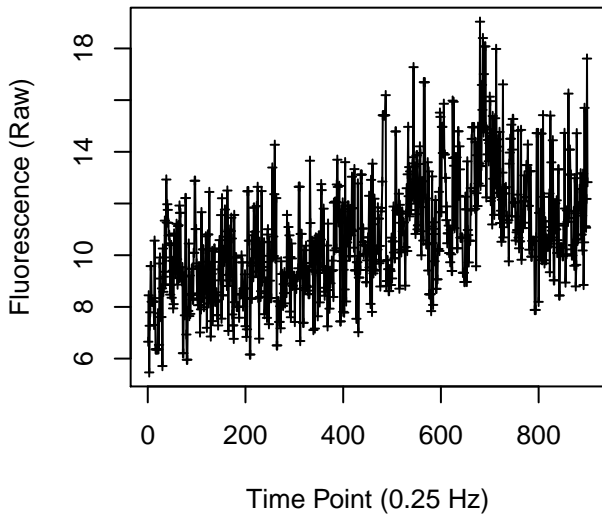

**Cell 792**

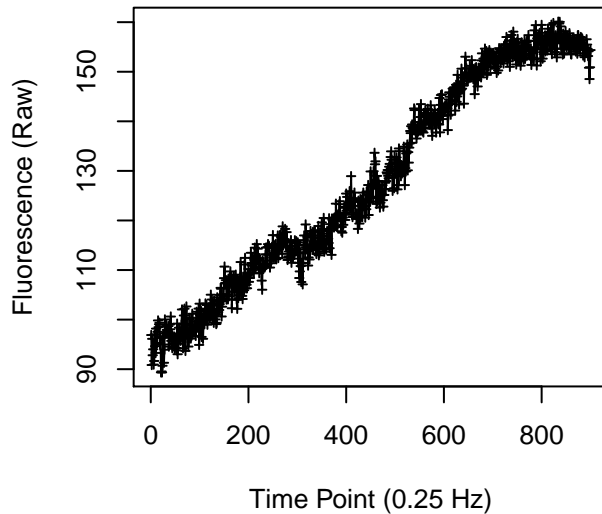

**Cell 793**

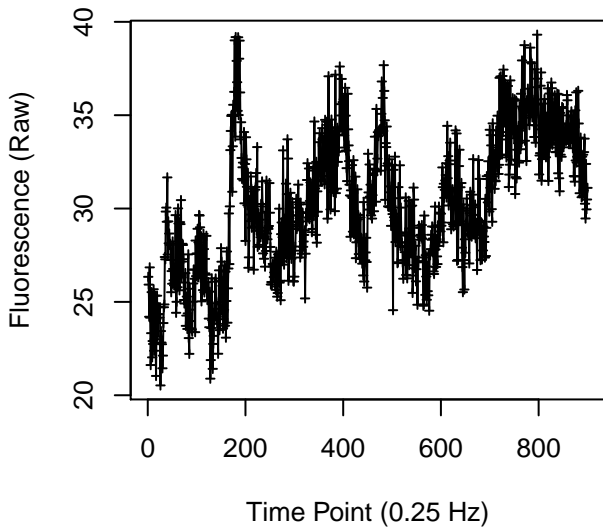

**Cell 794**

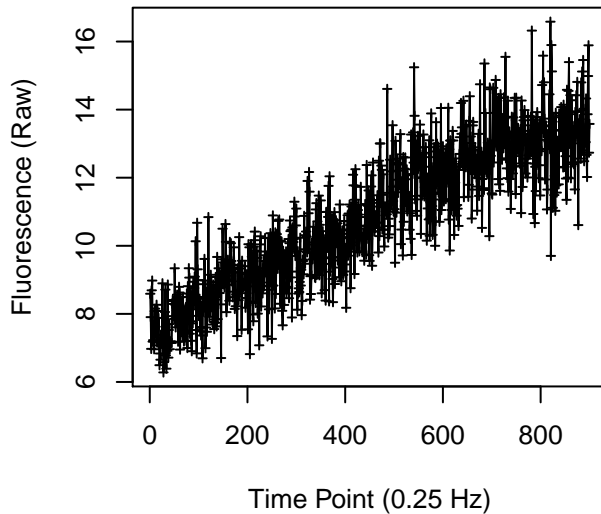

**Cell 795**

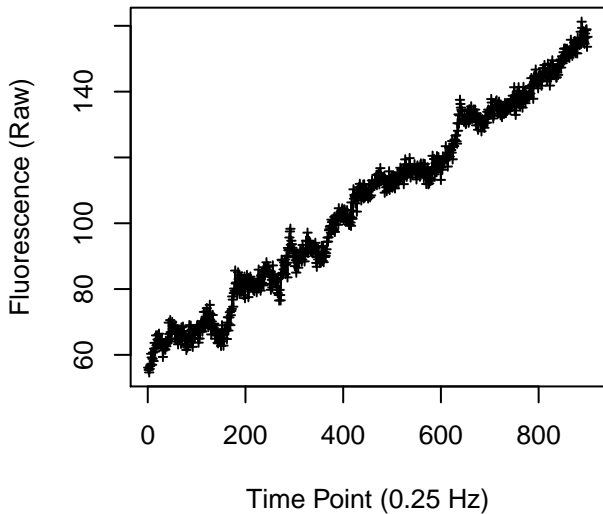

**Cell 796**

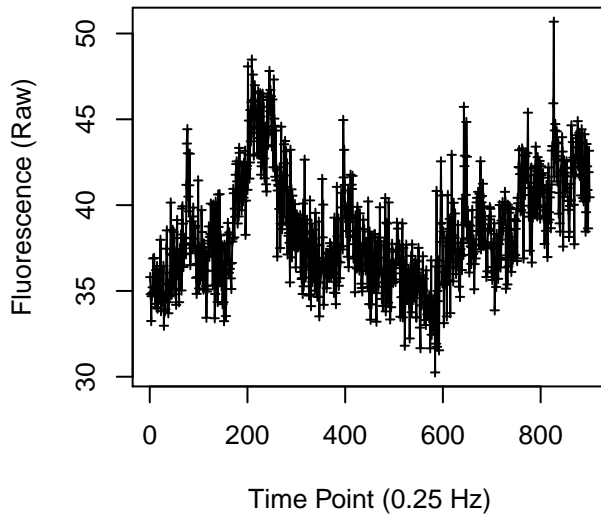

**Cell 797**

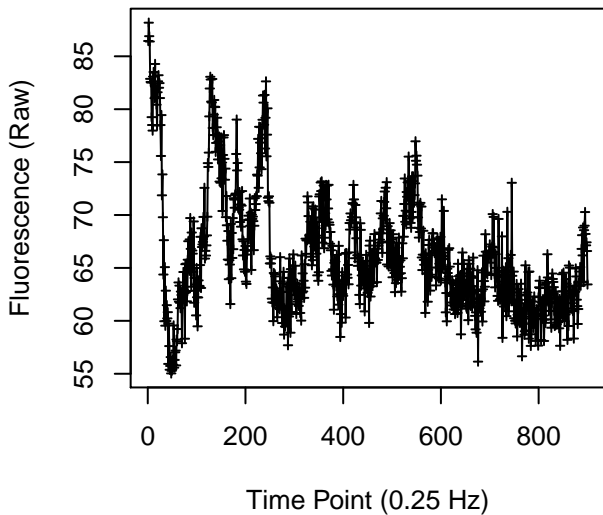

**Cell 798**

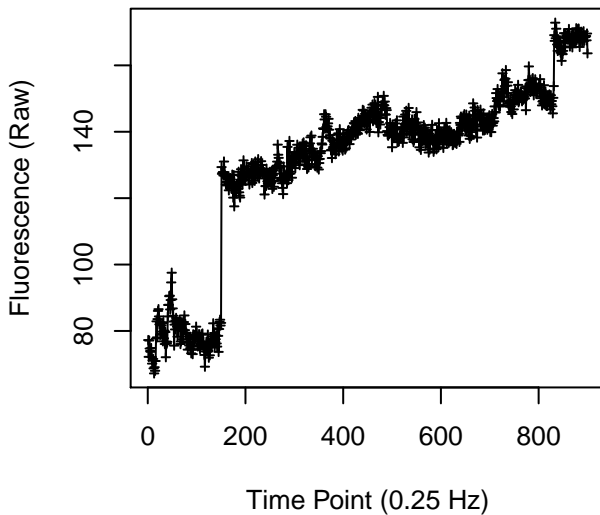

**Cell 799**

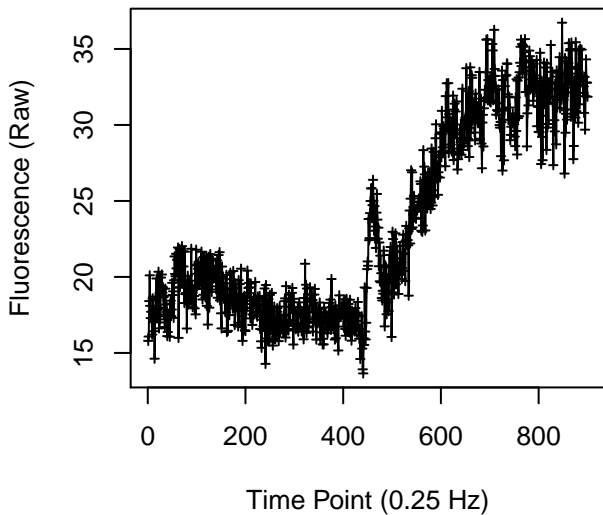

**Cell 800**

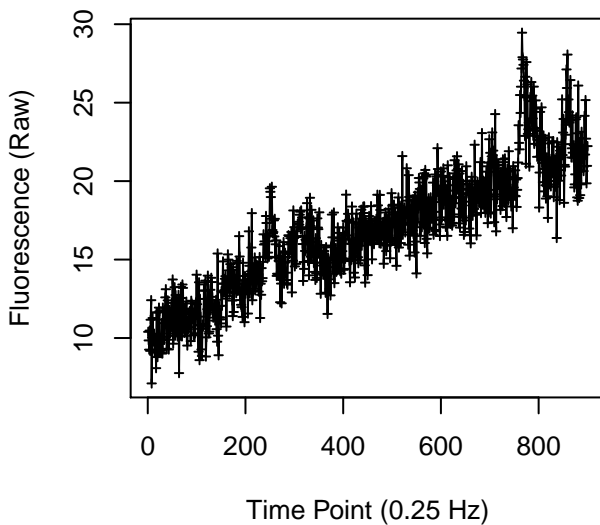

**Cell 801**

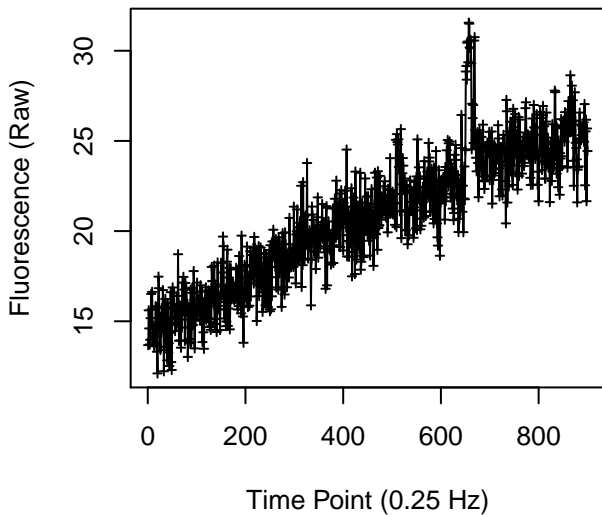

**Cell 802**

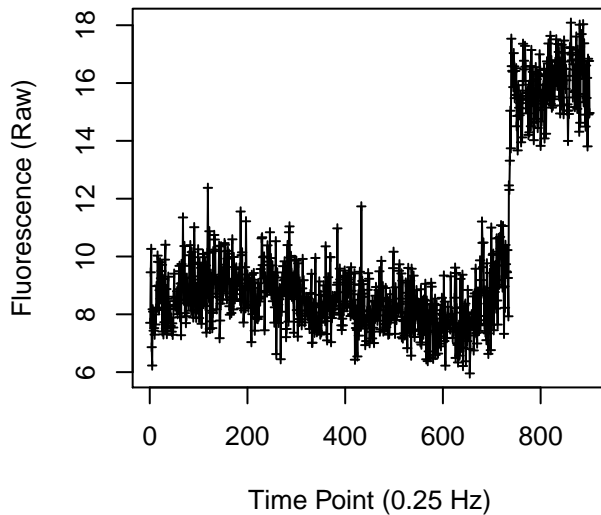

**Cell 803**

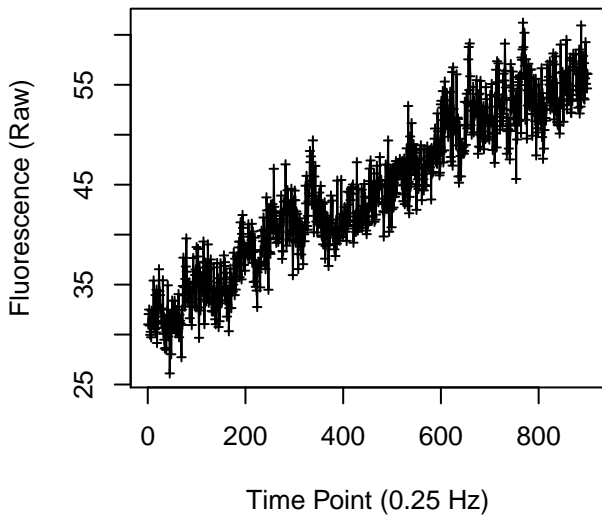

**Cell 804**

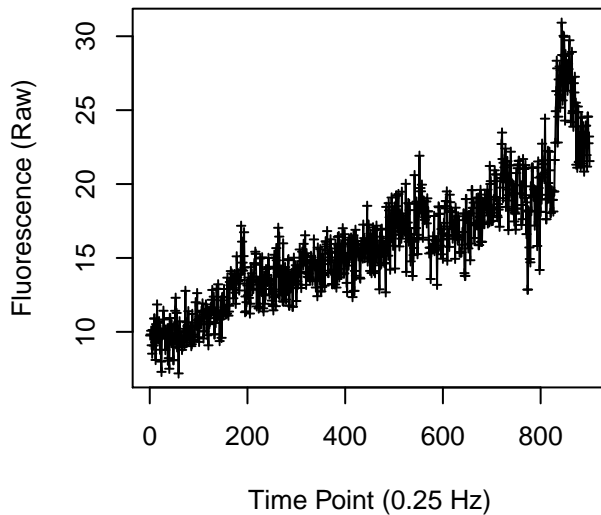

**Cell 805**

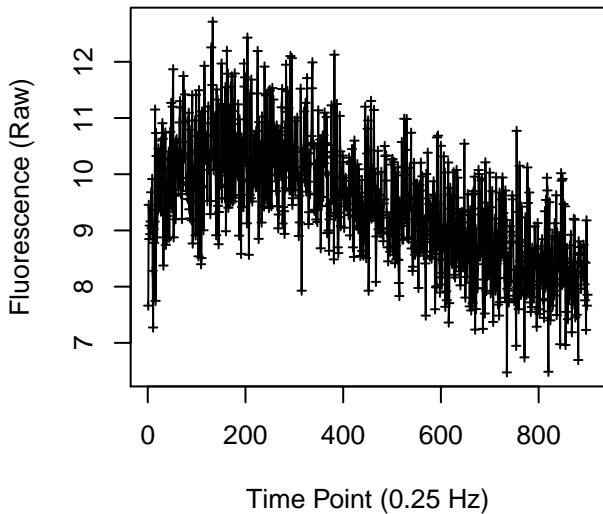

**Cell 806**

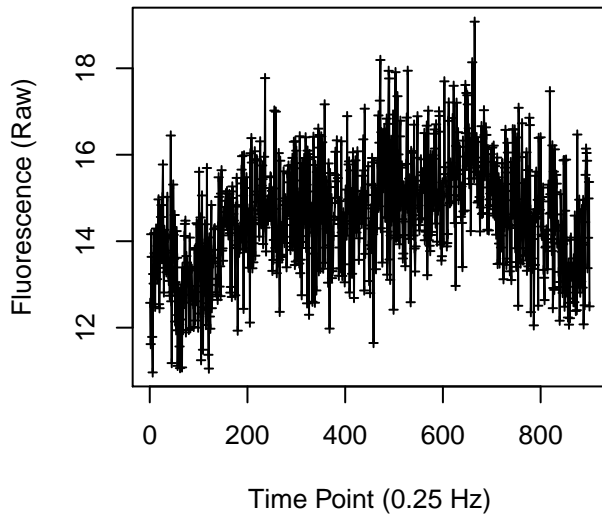

**Cell 807**

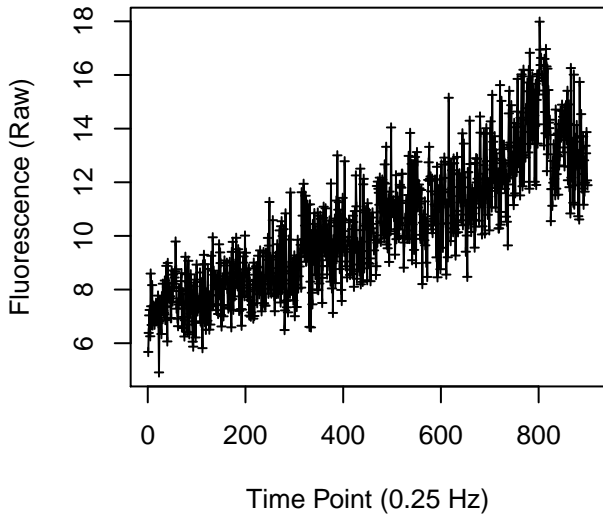

**Cell 808**

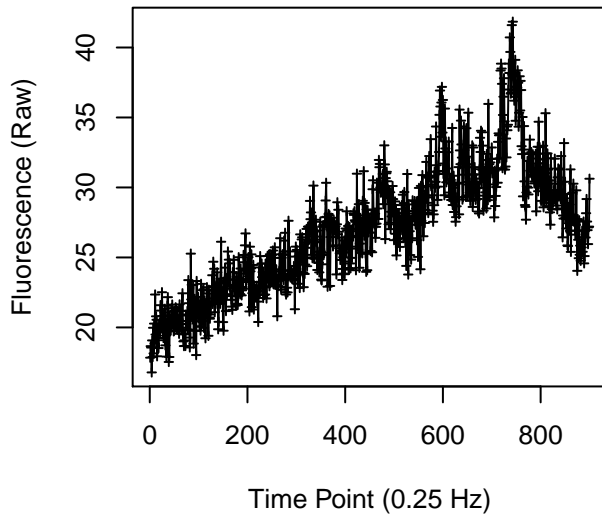



**Cell 809**

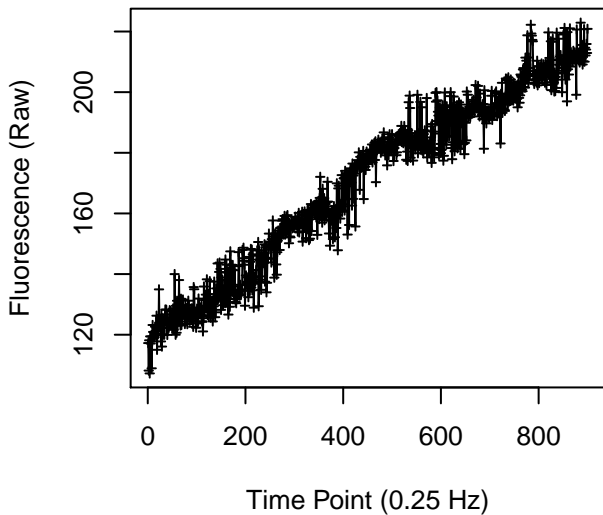

**Cell 810**

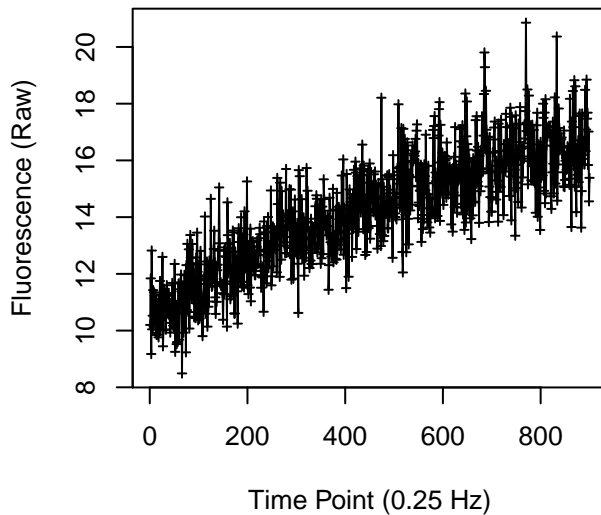

**Cell 811**

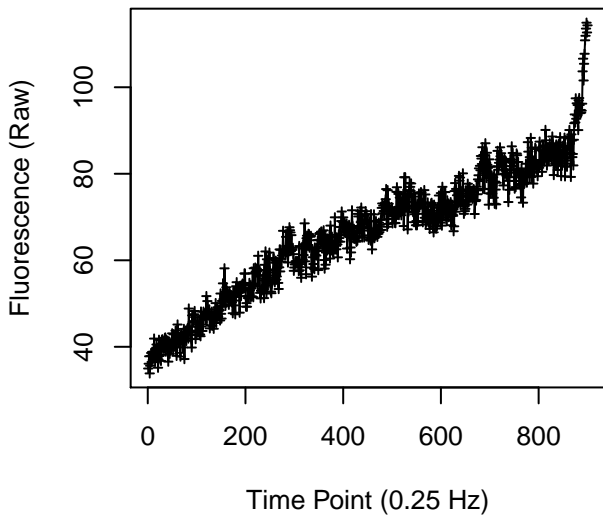

**Cell 812**

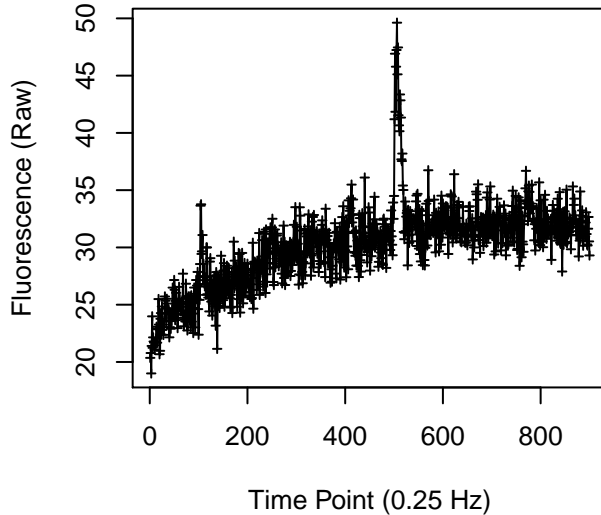

**Cell 813**

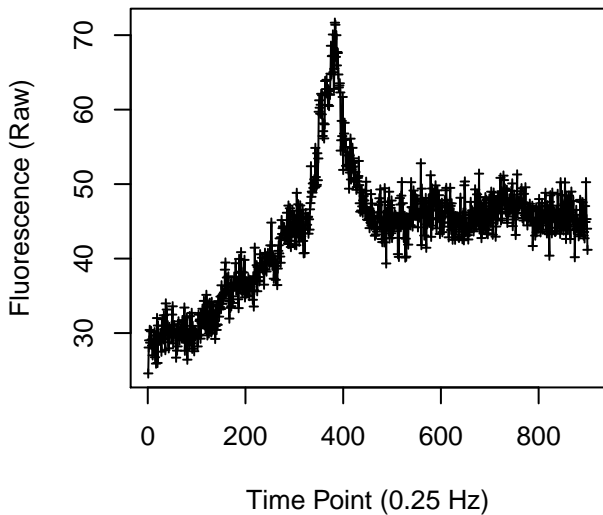

**Cell 814**

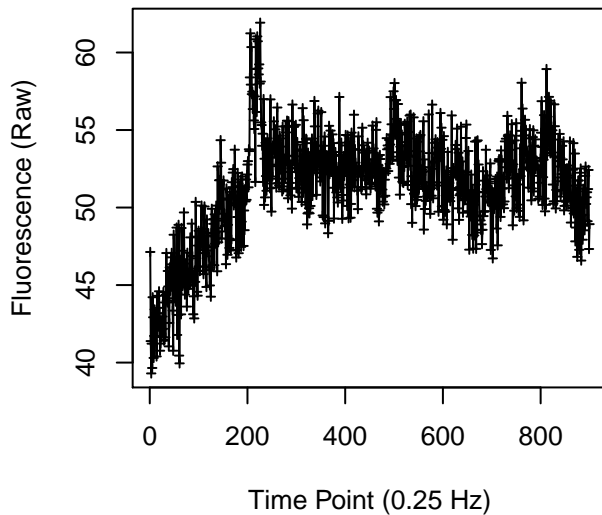

**Cell 815**

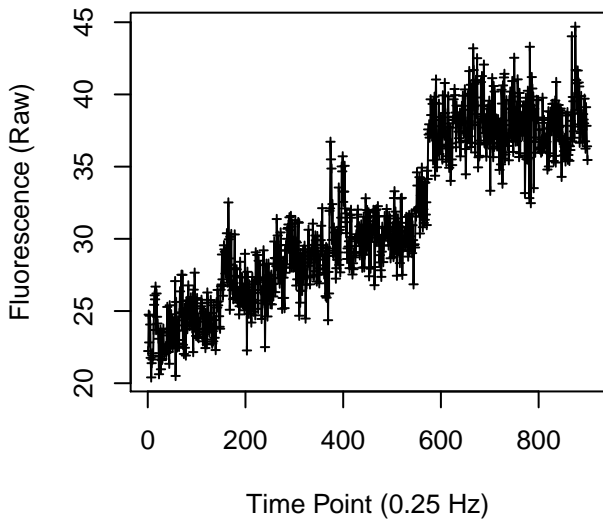

**Cell 816**

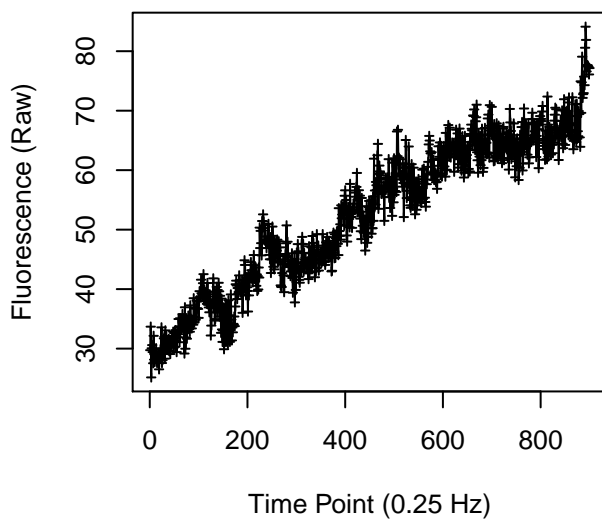

**Cell 817**

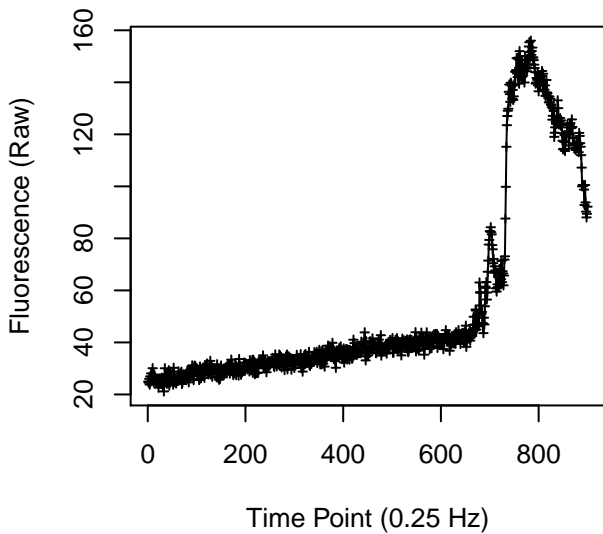

**Cell 818**

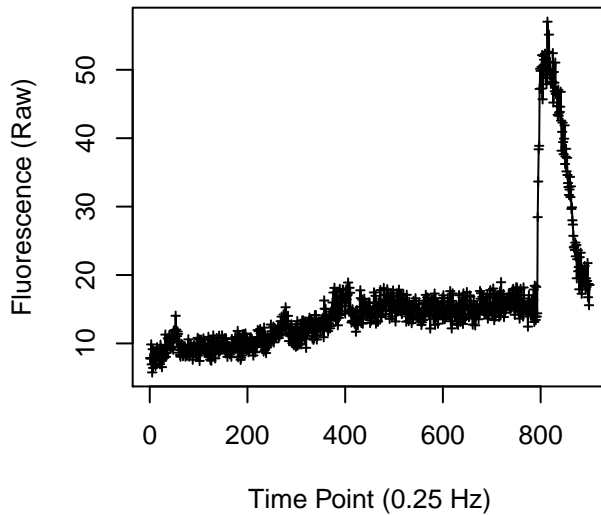

**Cell 819**

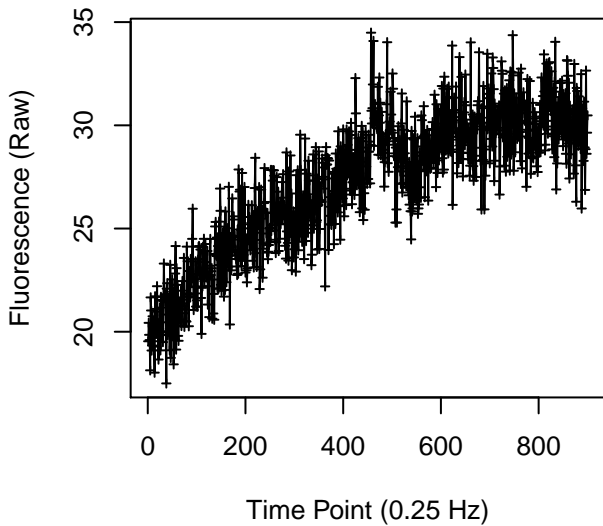

**Cell 820**

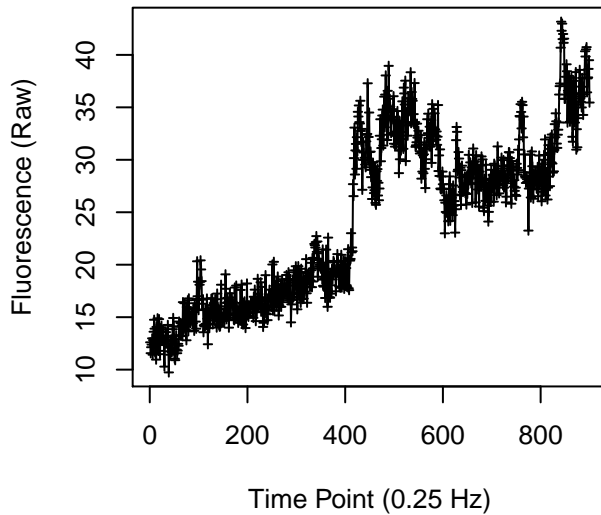

**Cell 821**

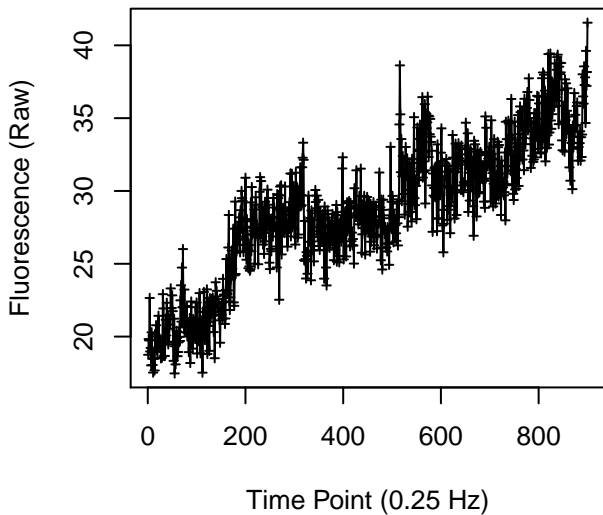

**Cell 822**

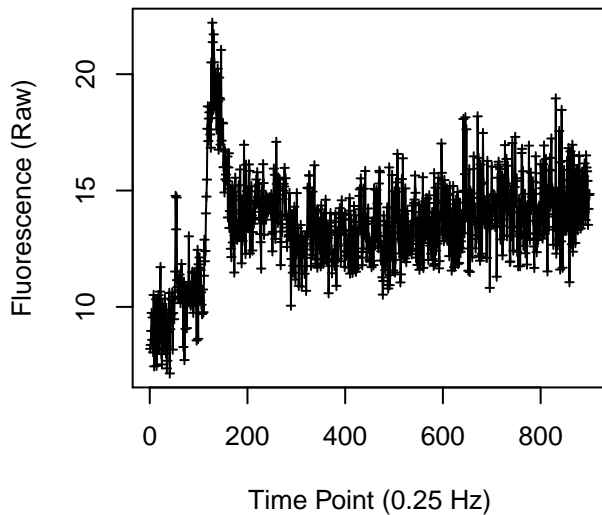

**Cell 823**

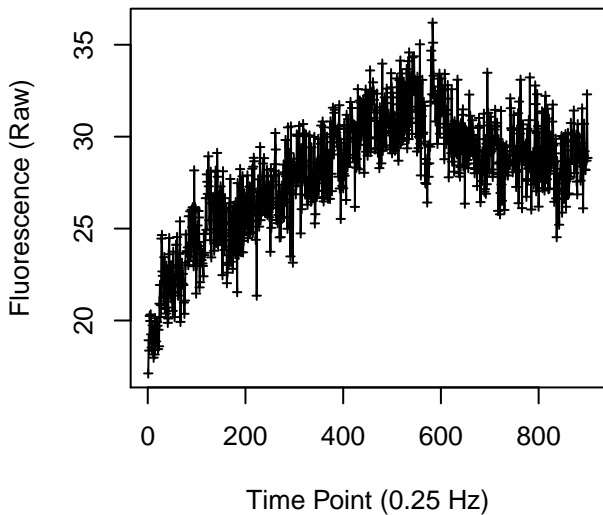

**Cell 824**

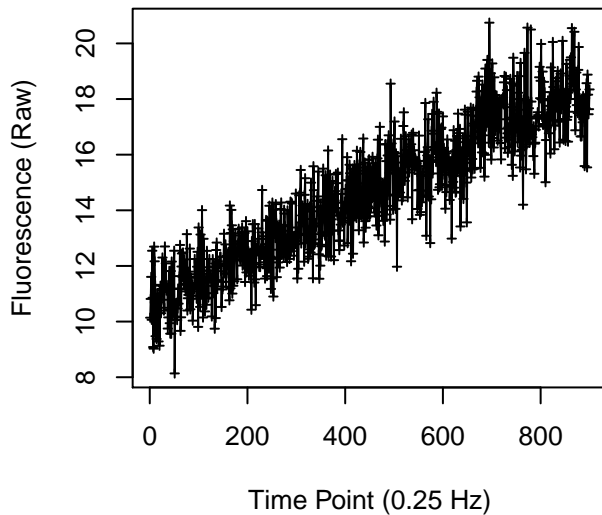

**Cell 825**

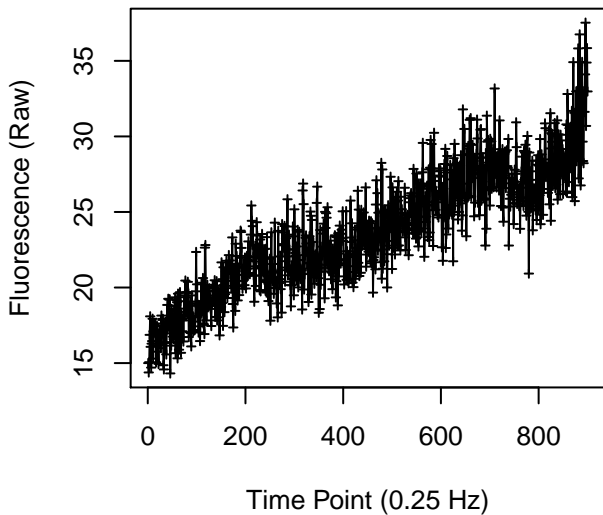

**Cell 826**

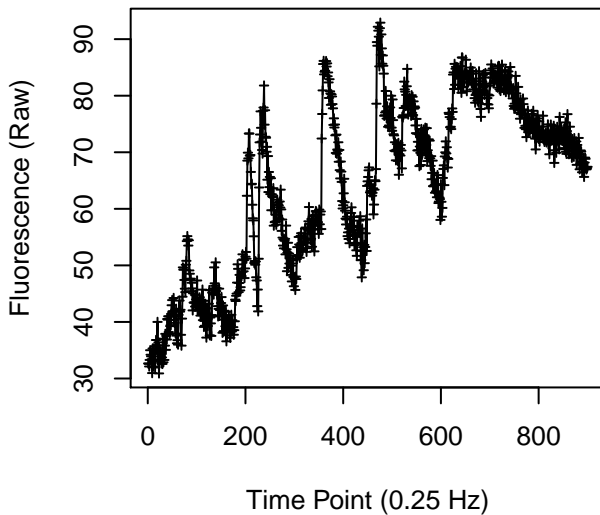

**Cell 827**

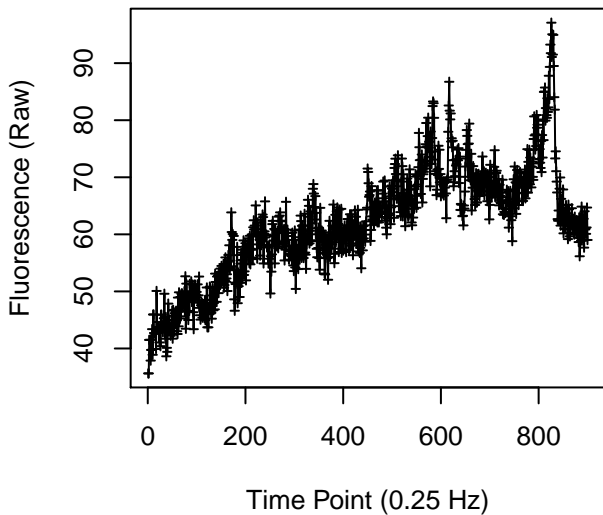

**Cell 828**

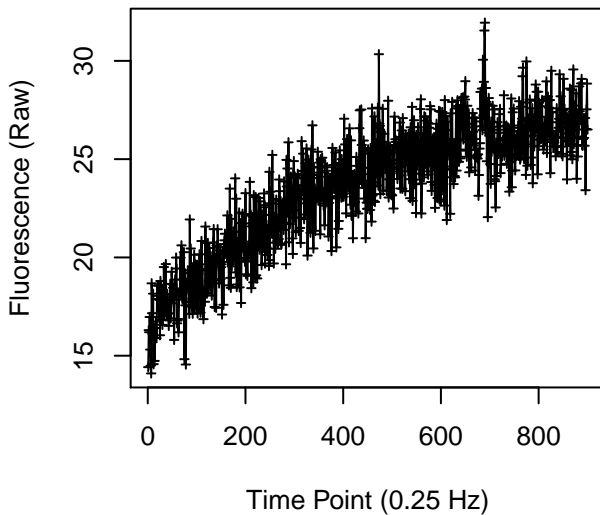

**Cell 829**

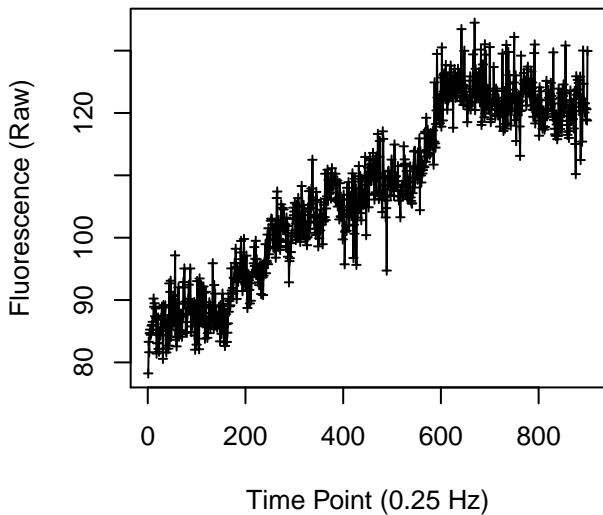

**Cell 830**

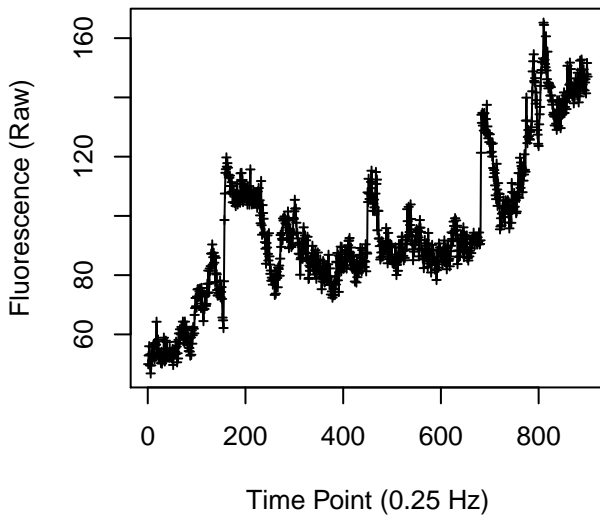

**Cell 831**

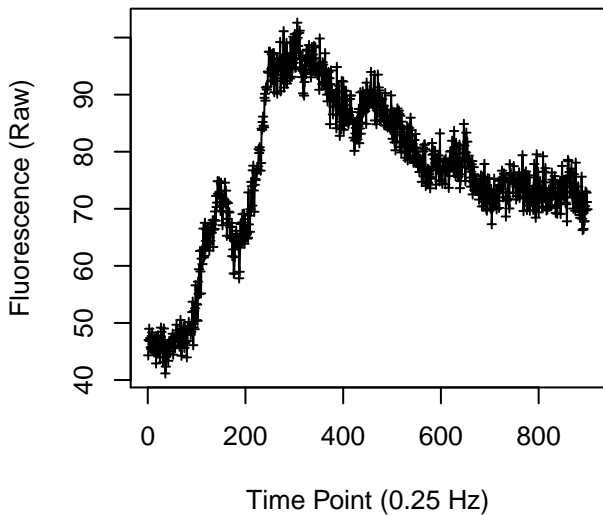

**Cell 832**

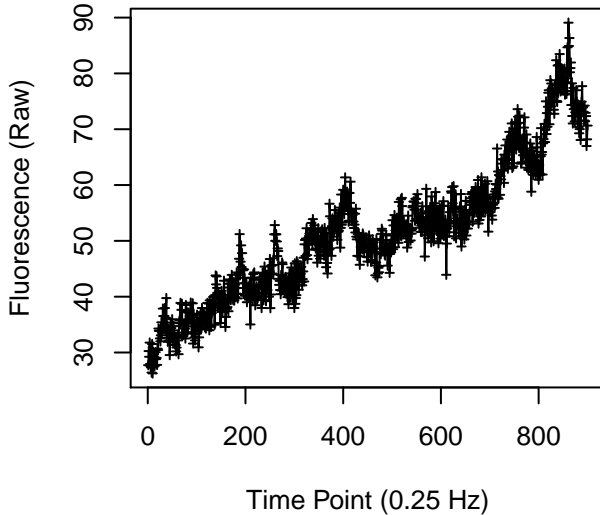

**Cell 833**

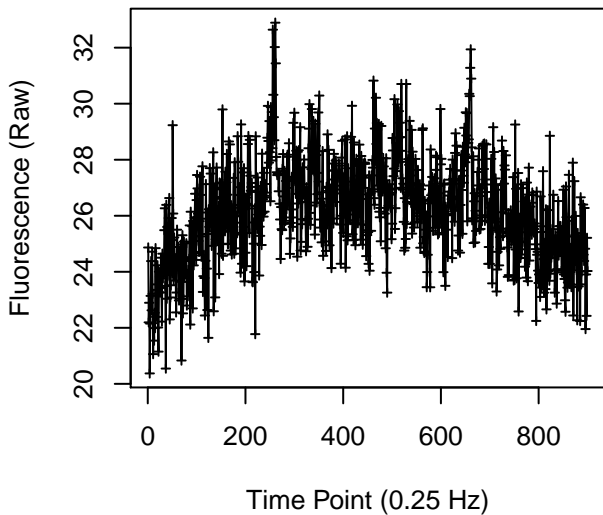

**Cell 834**

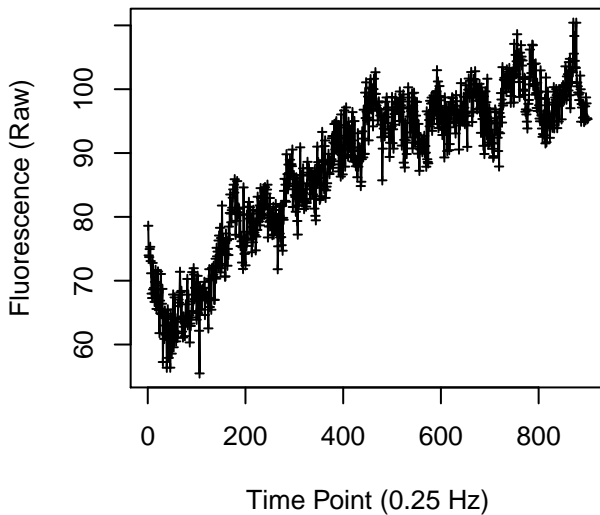

**Cell 835**

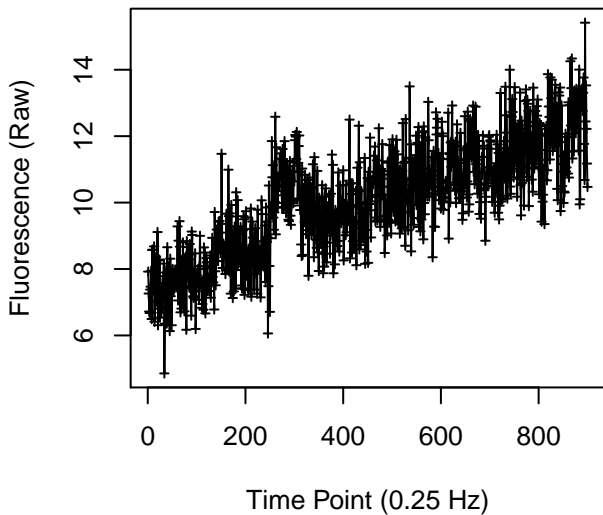

**Cell 836**

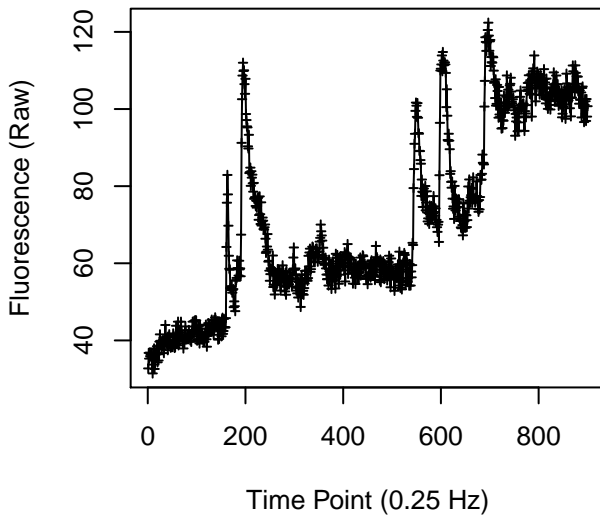

**Cell 837**

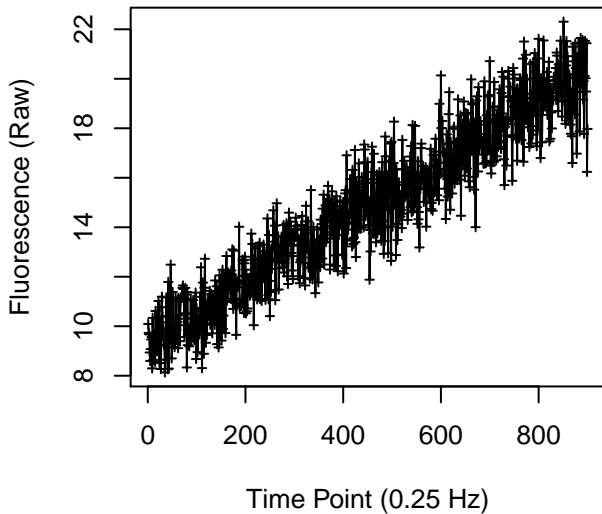

**Cell 838**

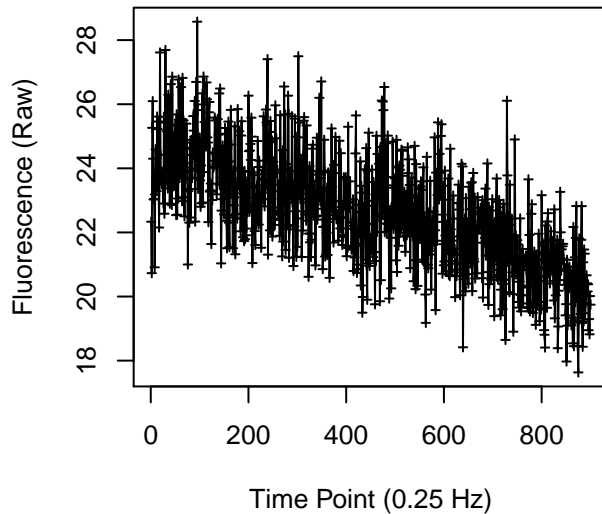

**Cell 839**

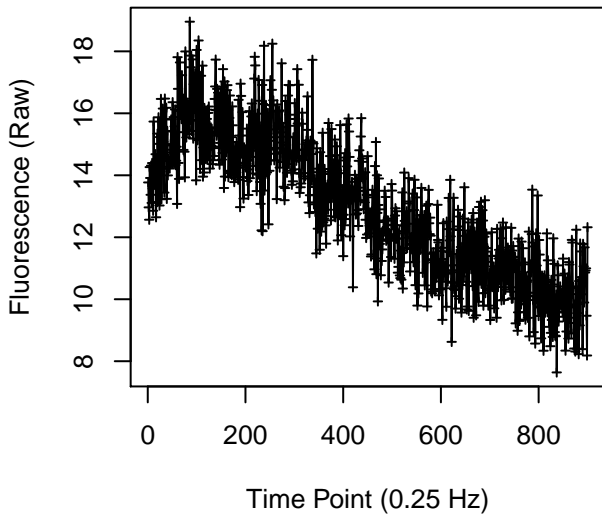

**Cell 840**

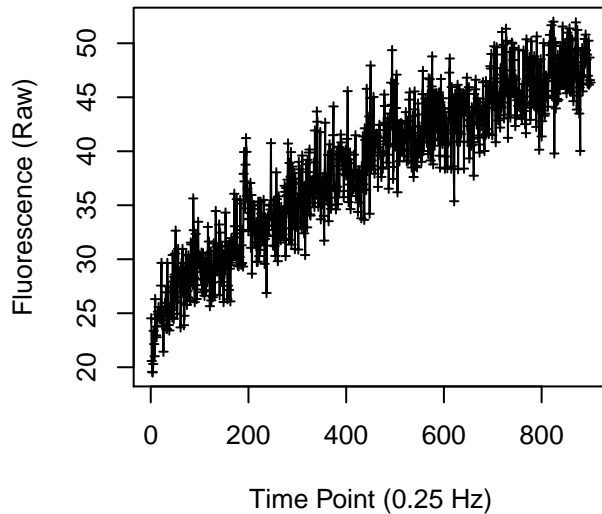



**Cell 841**

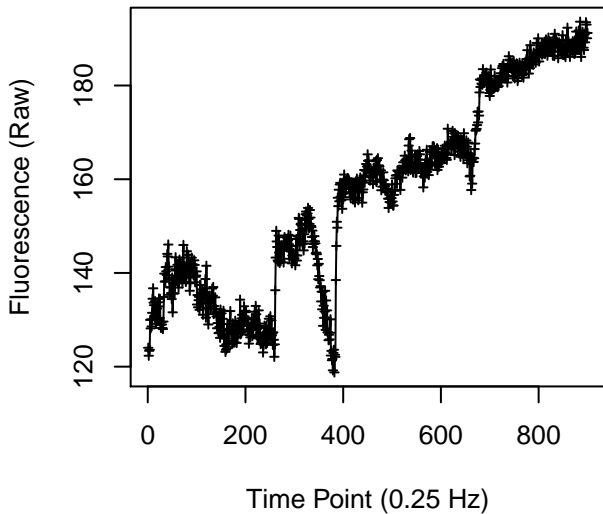

**Cell 842**

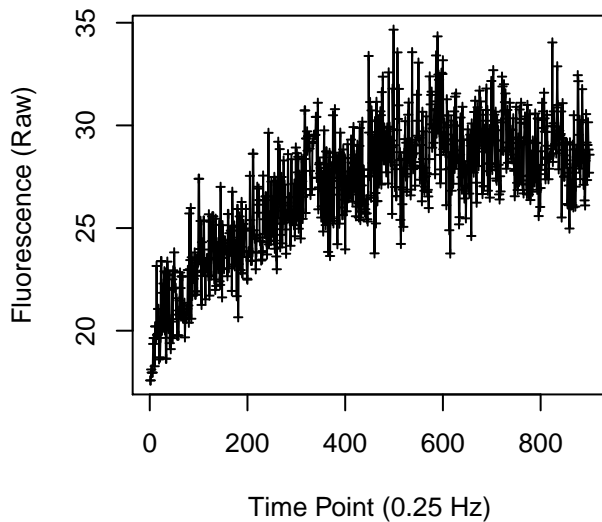

**Cell 843**

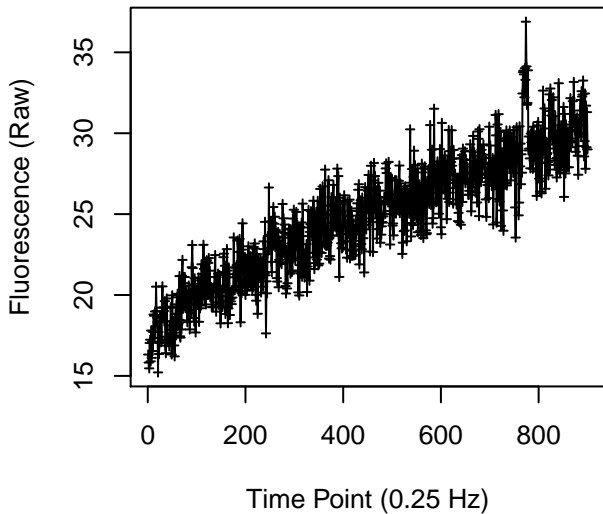

**Cell 844**

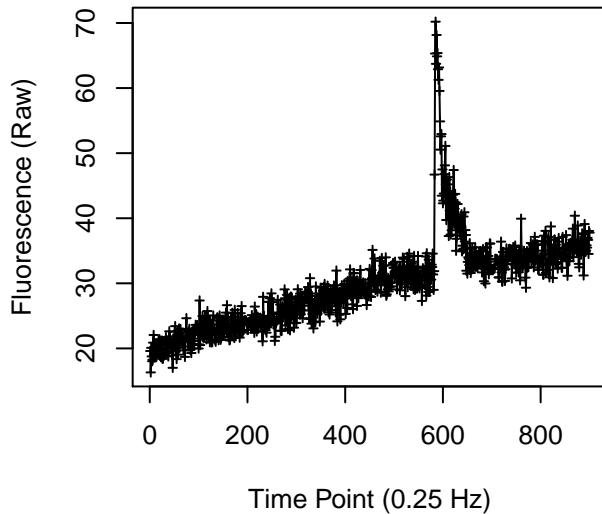

**Cell 845**

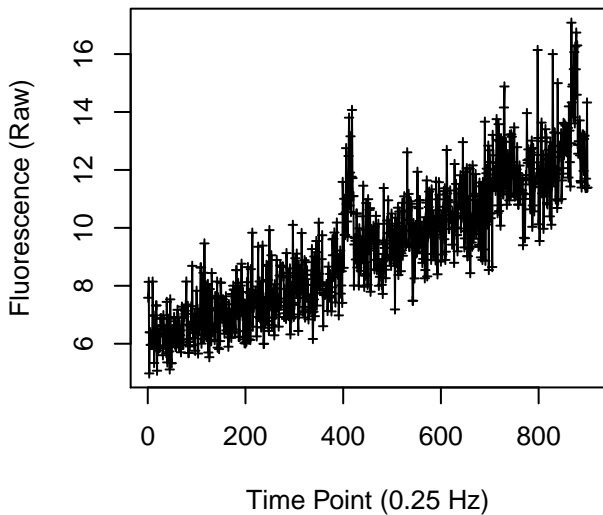

**Cell 846**

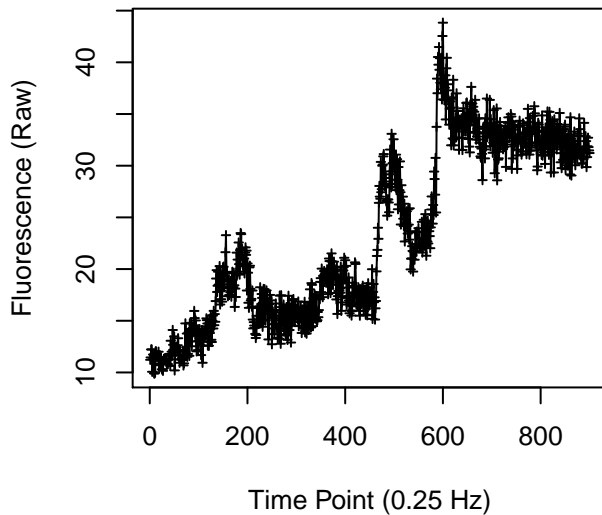

**Cell 847**

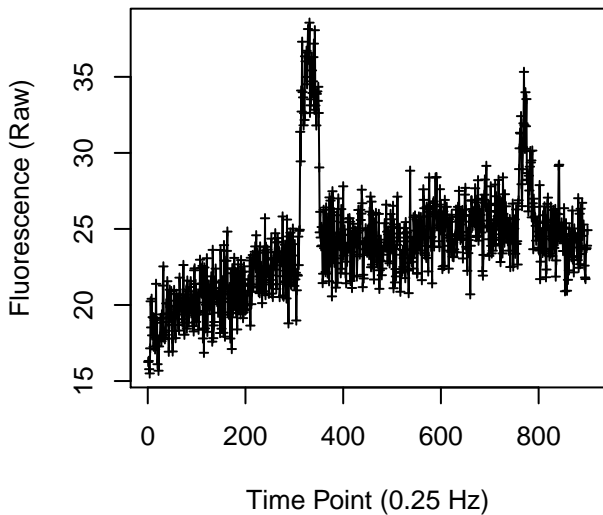

**Cell 848**

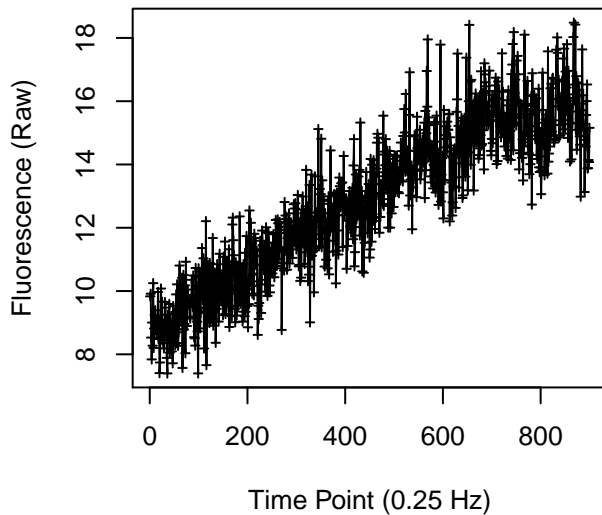

**Cell 849**

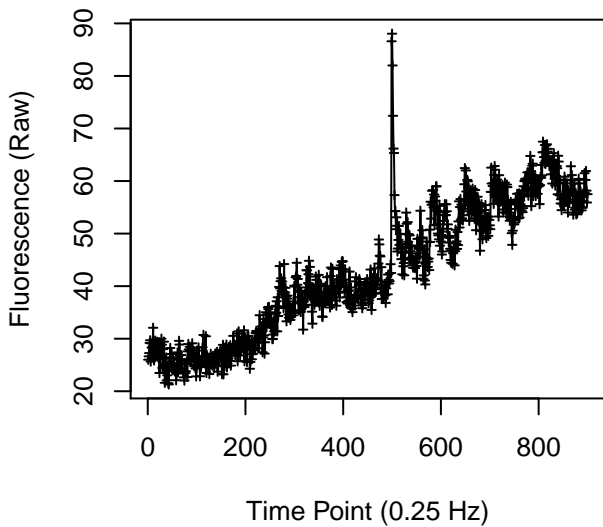

**Cell 850**

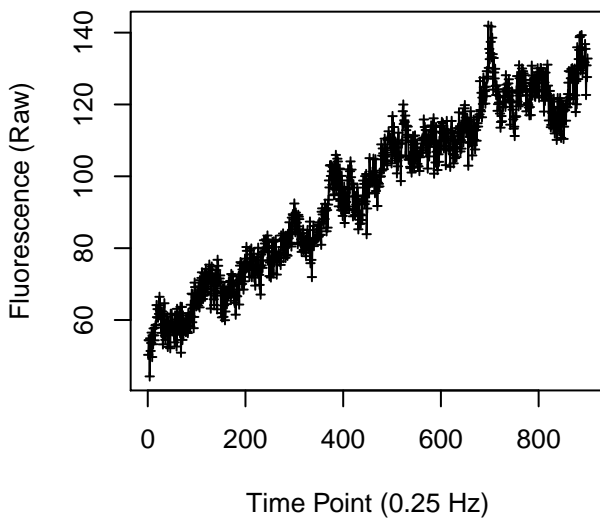

**Cell 851**

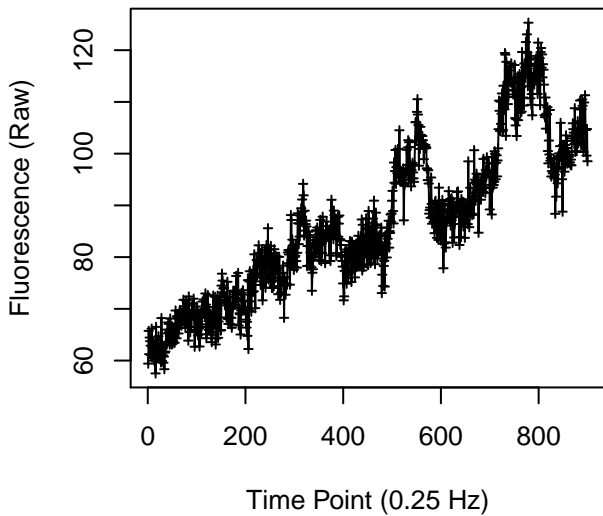

**Cell 852**

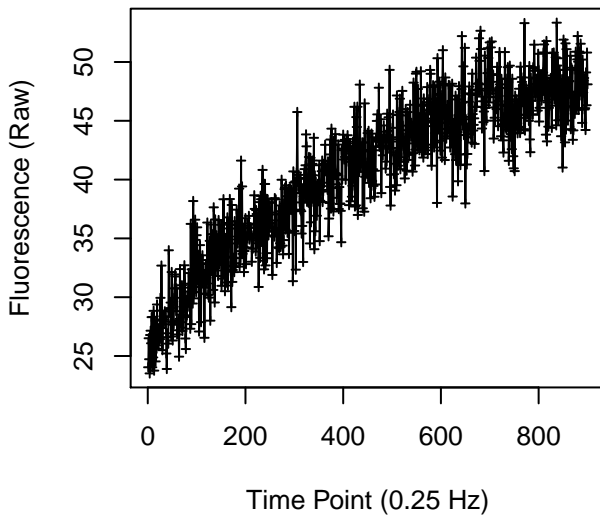

**Cell 853**

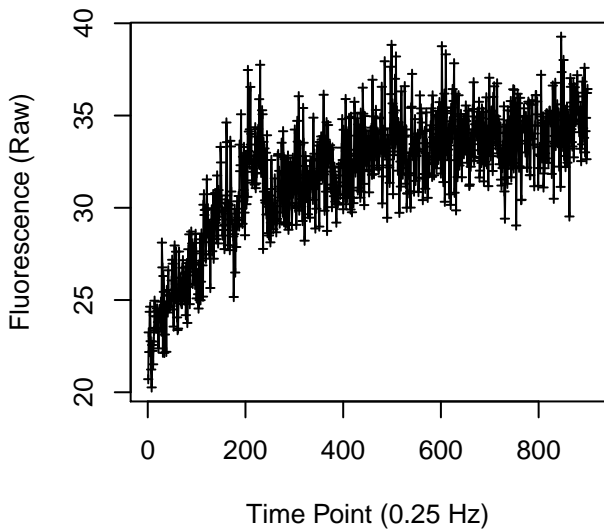

**Cell 854**

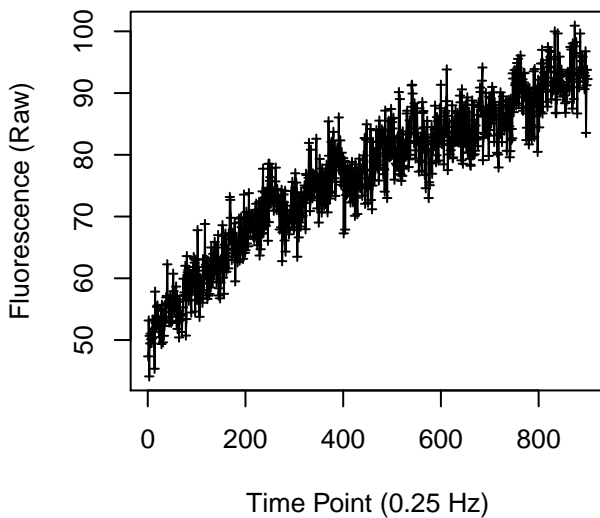

**Cell 855**

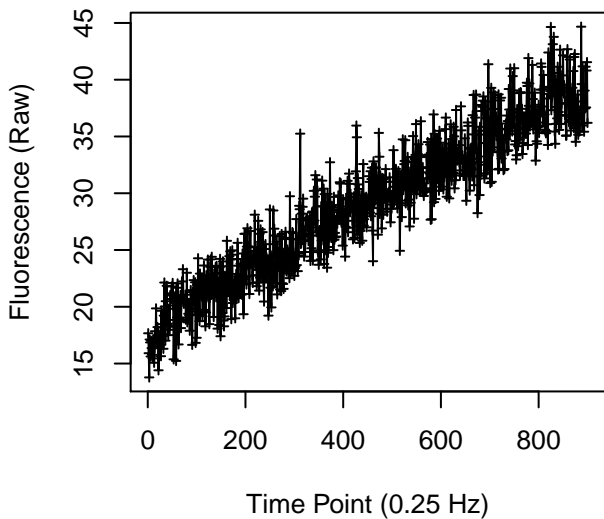

**Cell 856**

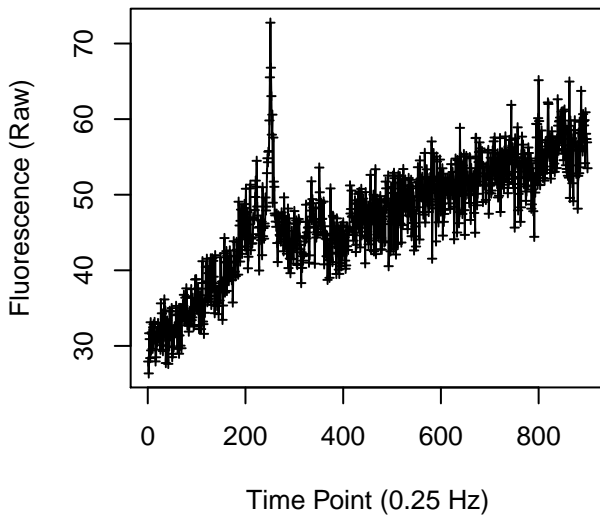

**Cell 857**

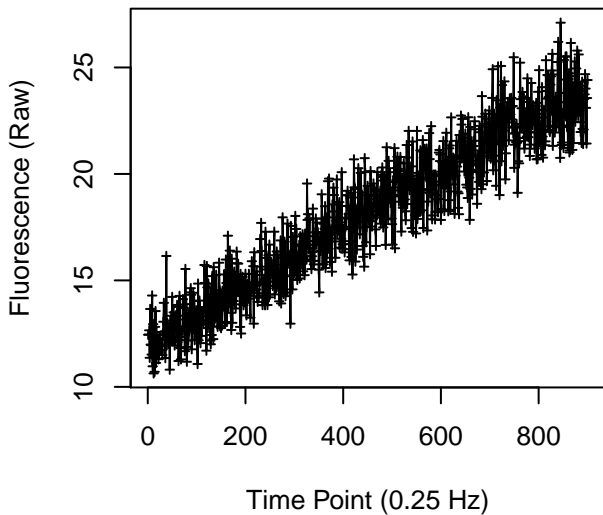

**Cell 858**

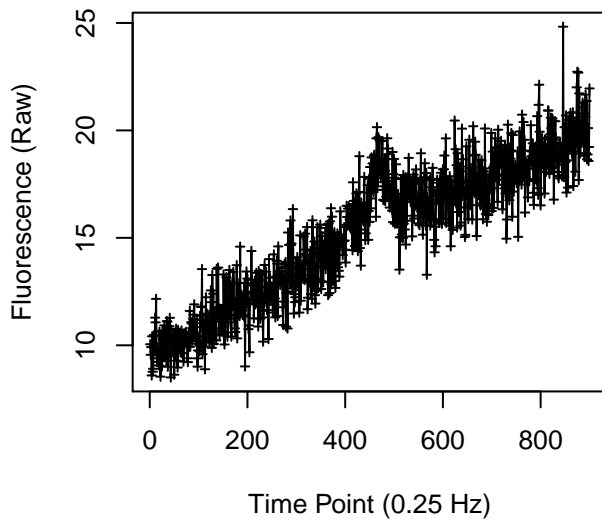

**Cell 859**

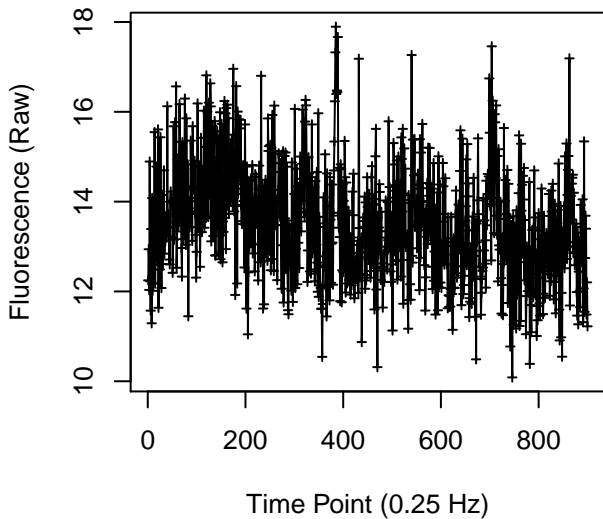

**Cell 860**

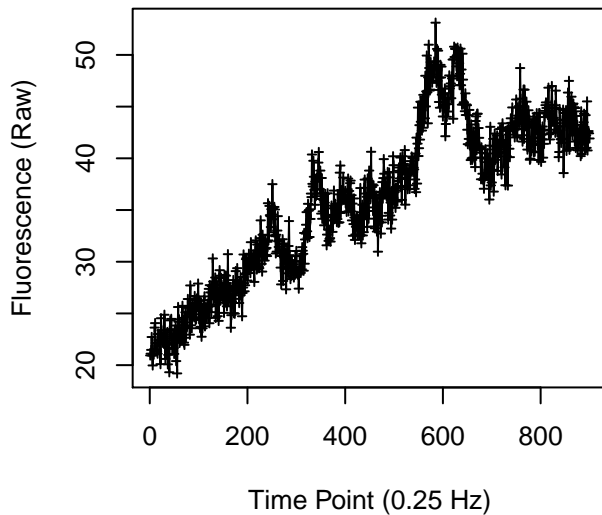

**Cell 861**

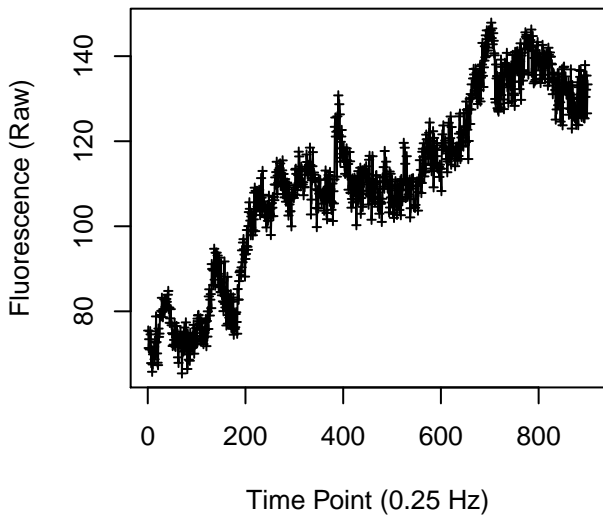

**Cell 862**

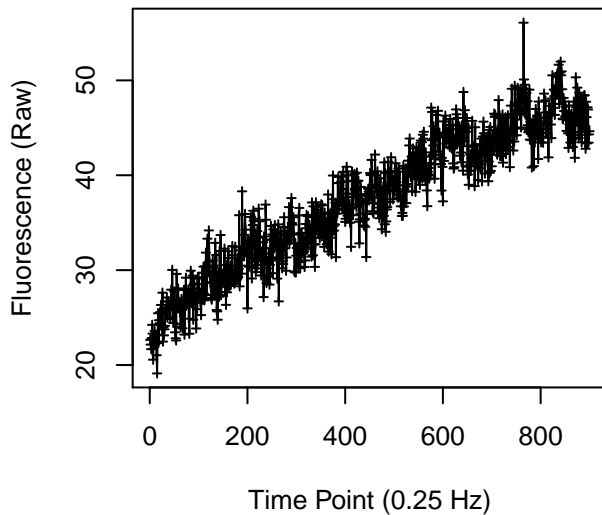

**Cell 863**

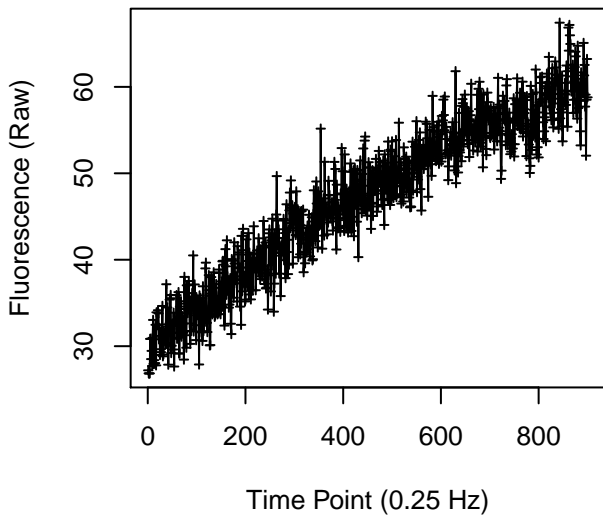

**Cell 864**

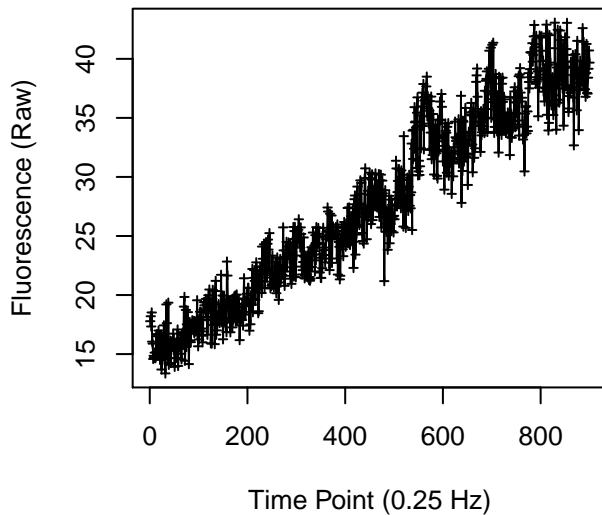

**Cell 865**

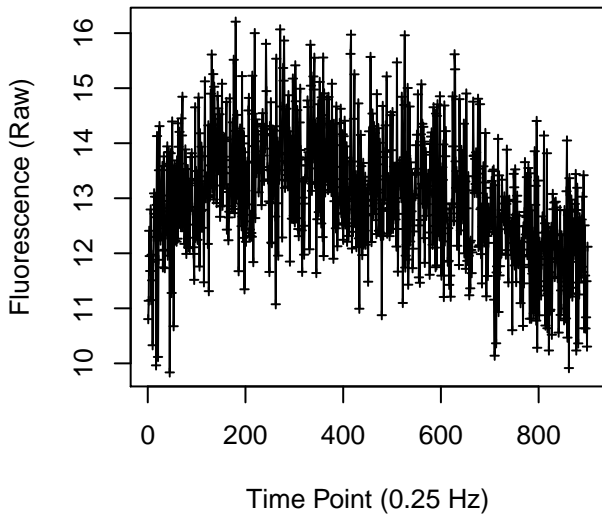

**Cell 866**

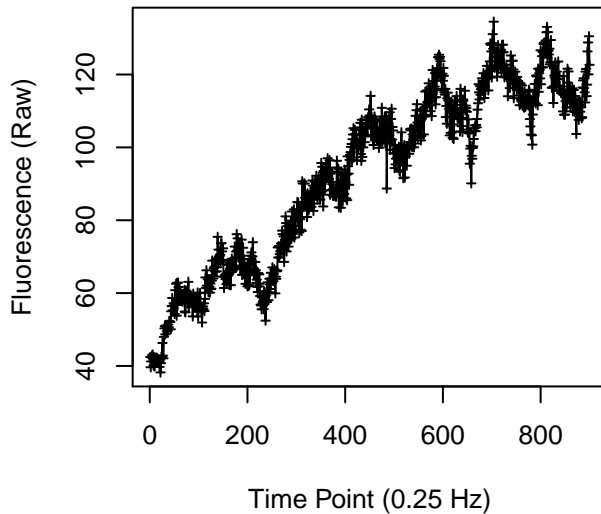

**Cell 867**

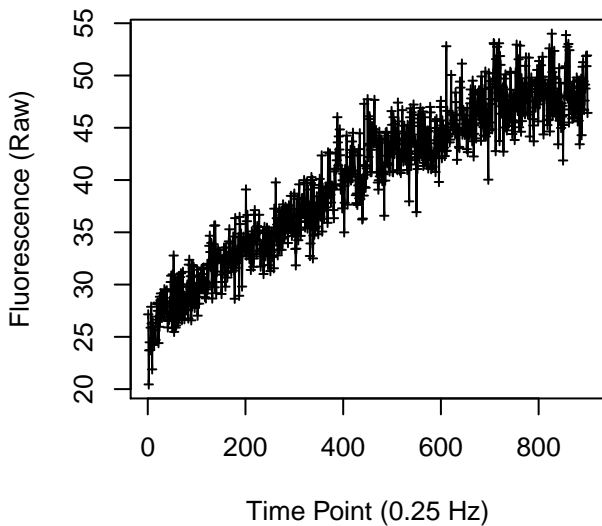

**Cell 868**

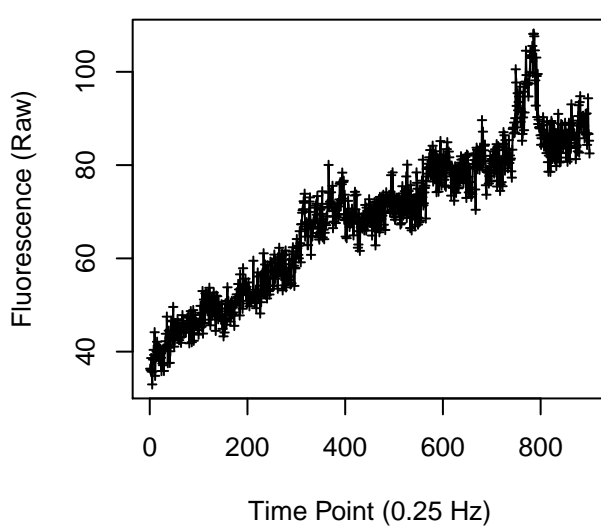

**Cell 869**

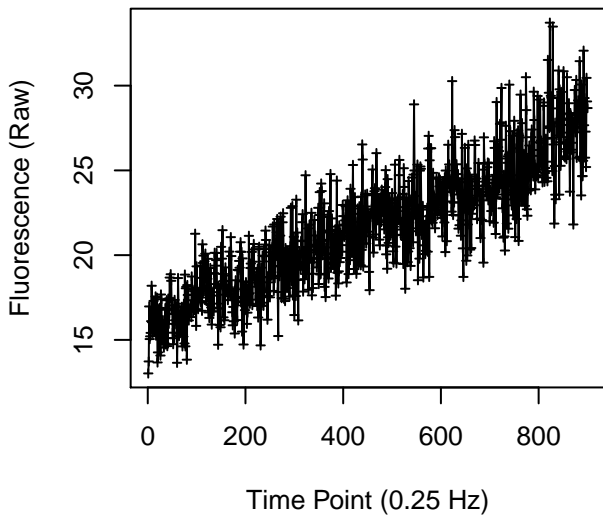

**Cell 870**

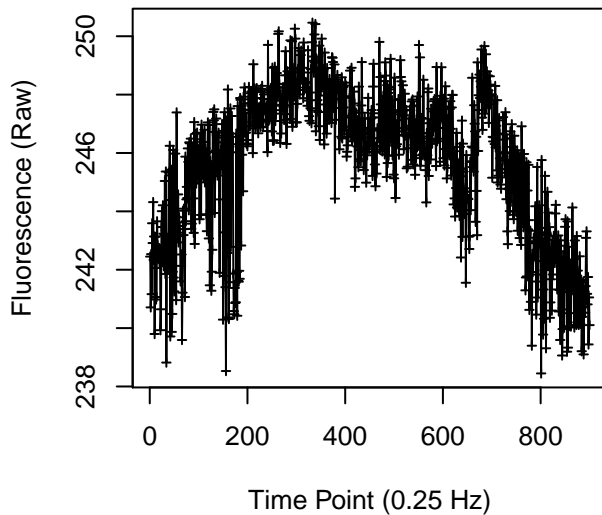

**Cell 871**

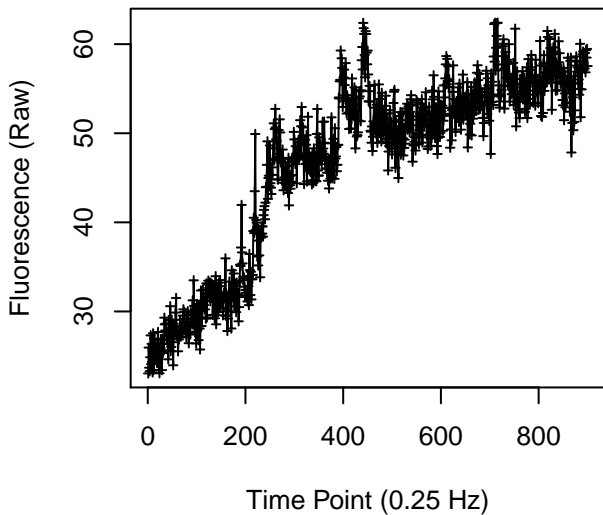

**Cell 872**

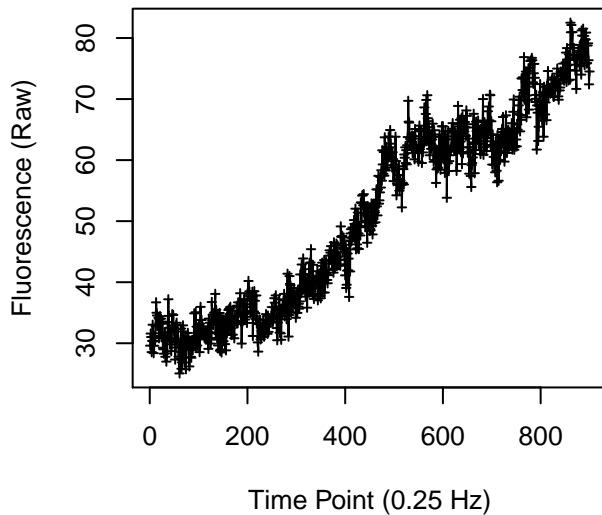



**Cell 873**

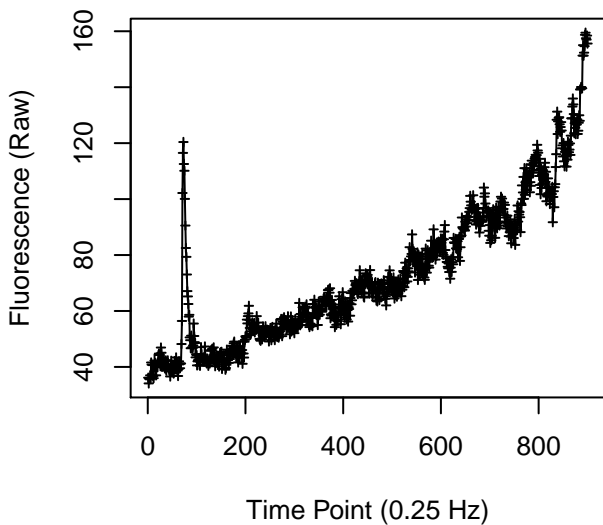

**Cell 874**

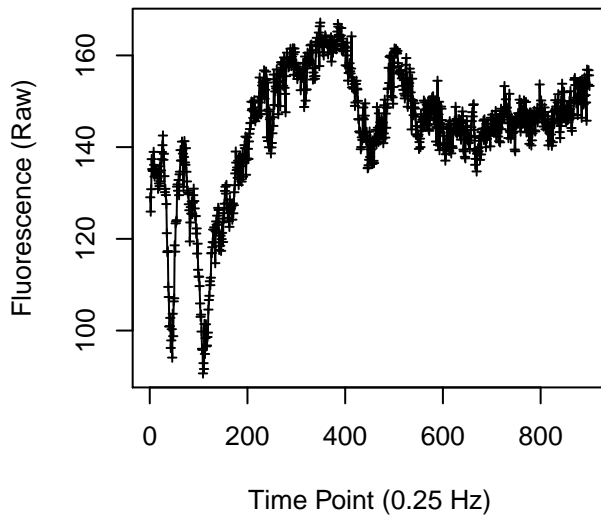

**Cell 875**

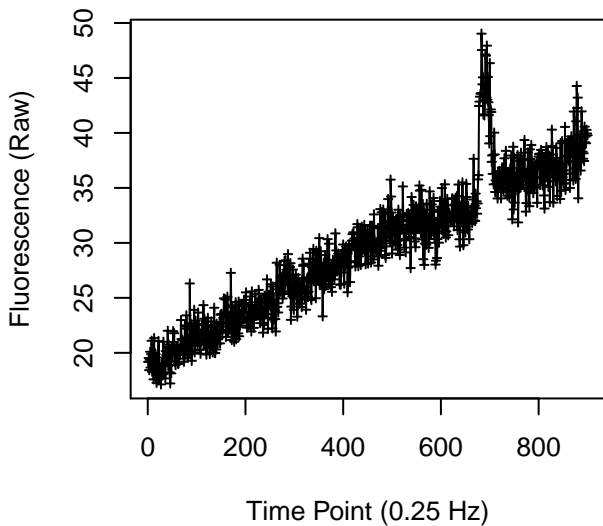

**Cell 876**

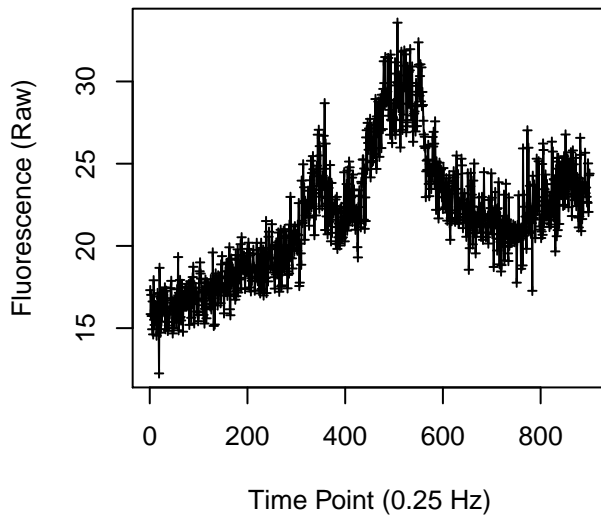

**Cell 877**

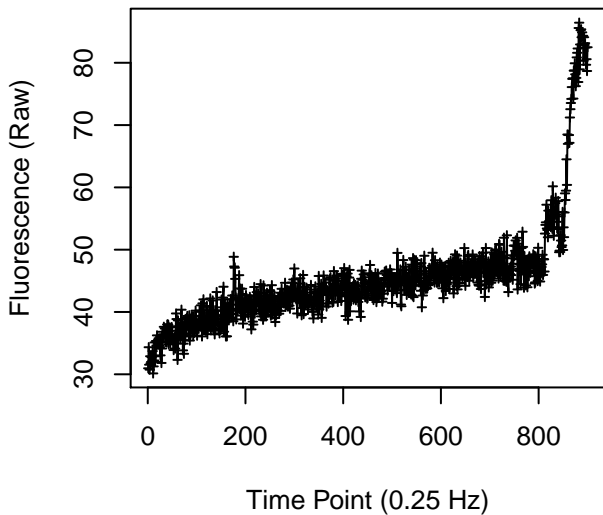

**Cell 878**

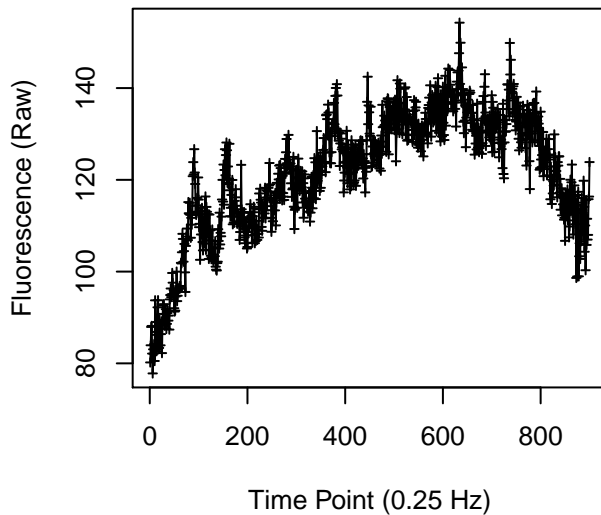

**Cell 879**

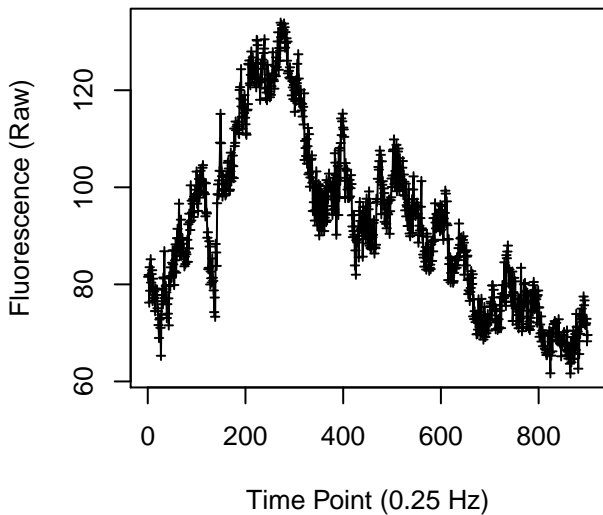

**Cell 880**

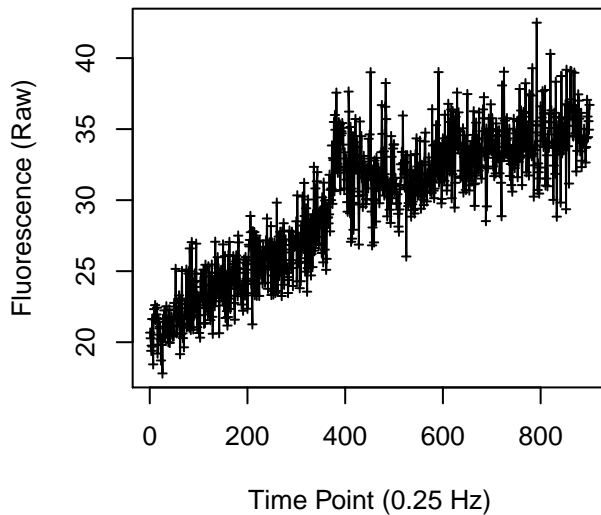

**Cell 881**

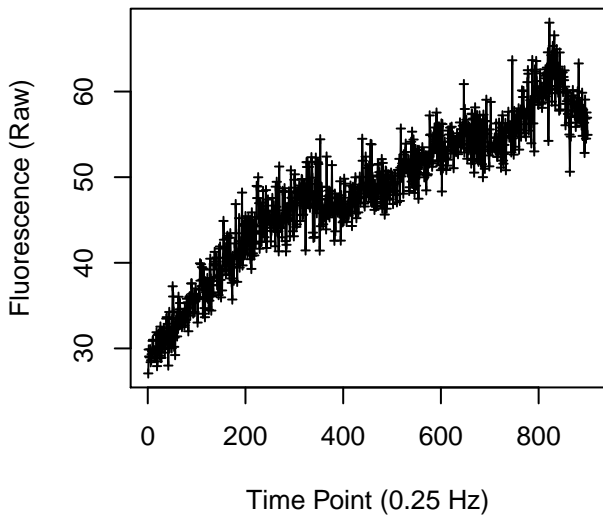

**Cell 882**

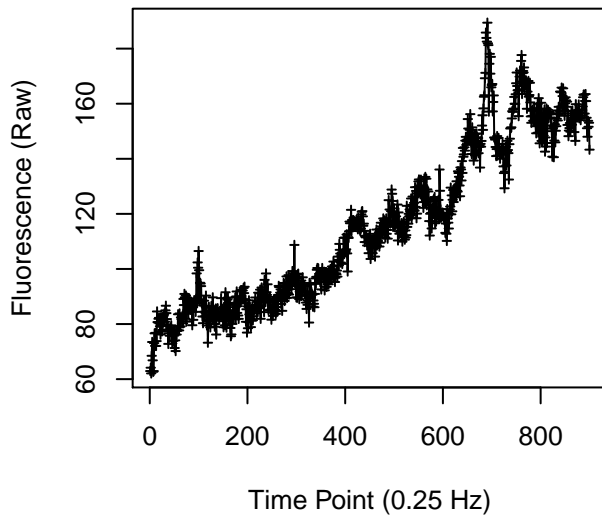

**Cell 883**

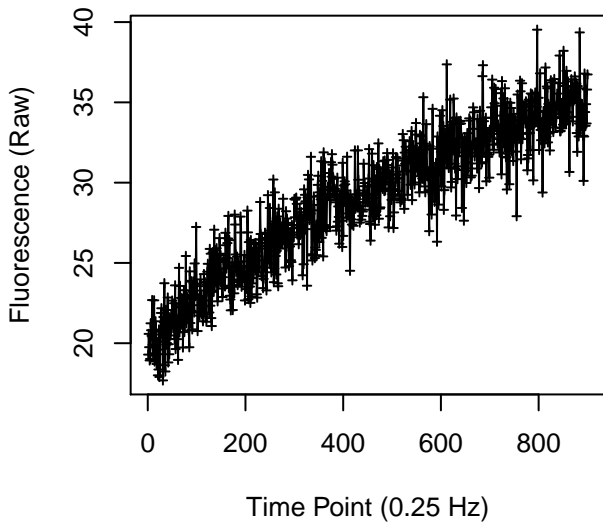

**Cell 884**

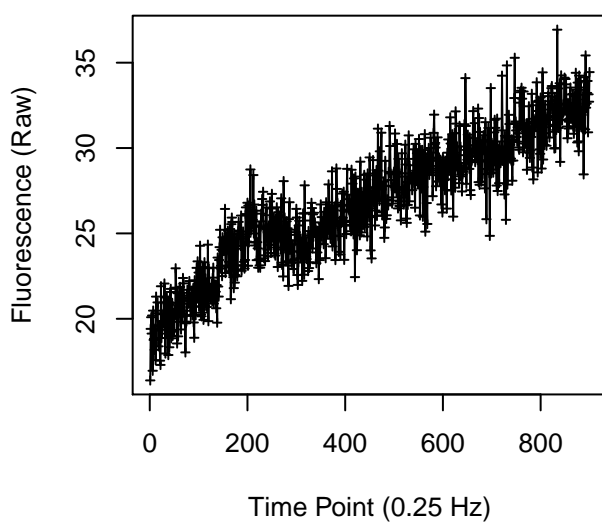

**Cell 885**

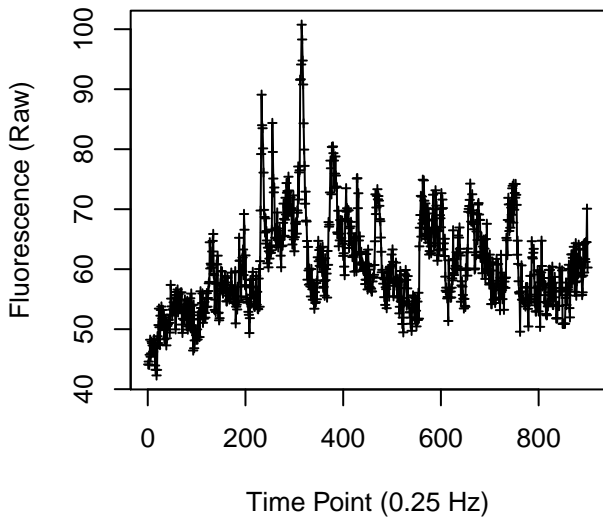

**Cell 886**

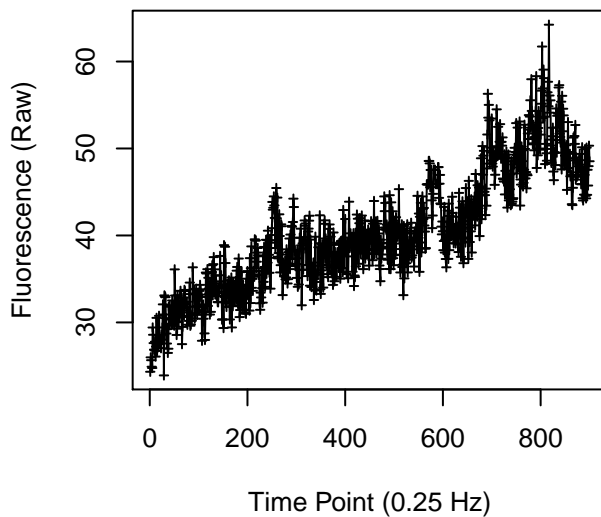

**Cell 887**

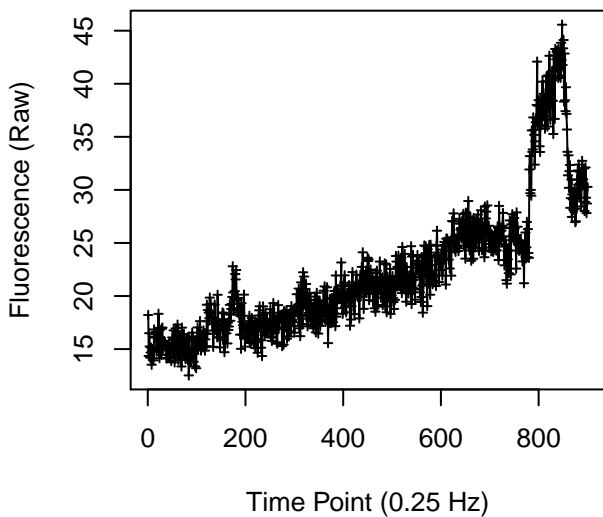

**Cell 888**

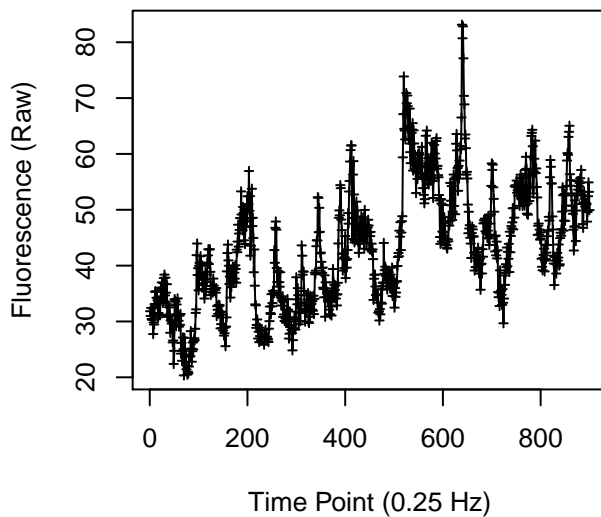

**Cell 889**

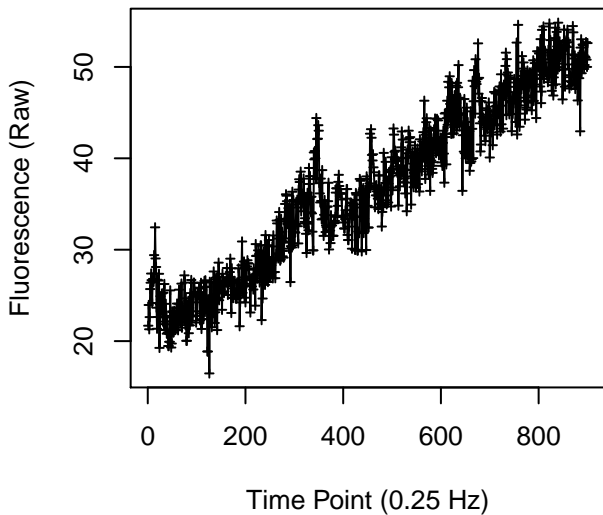

**Cell 890**

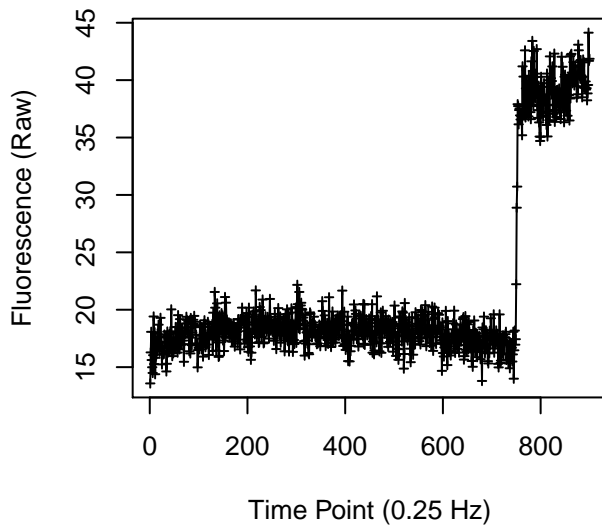

**Cell 891**

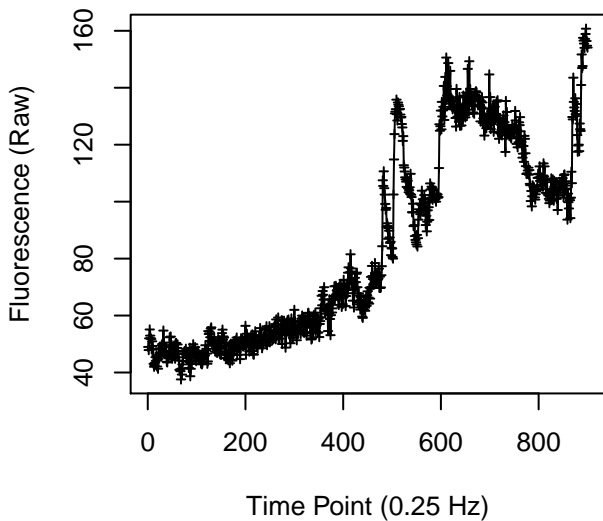

**Cell 892**

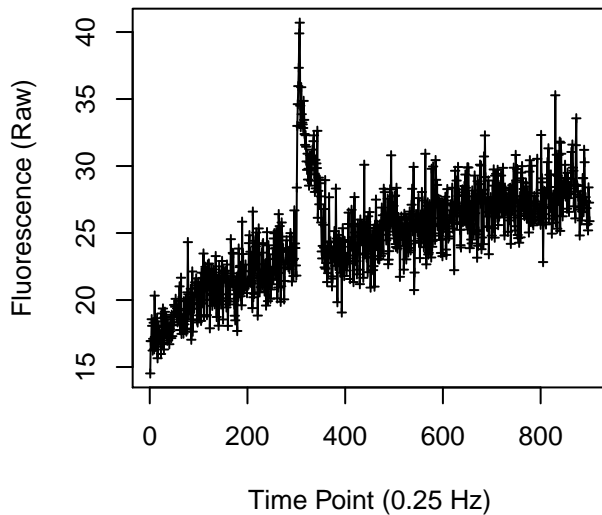

**Cell 893**

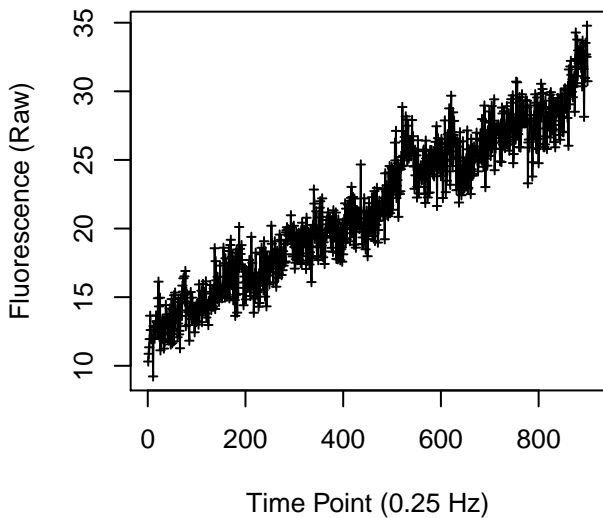

**Cell 894**

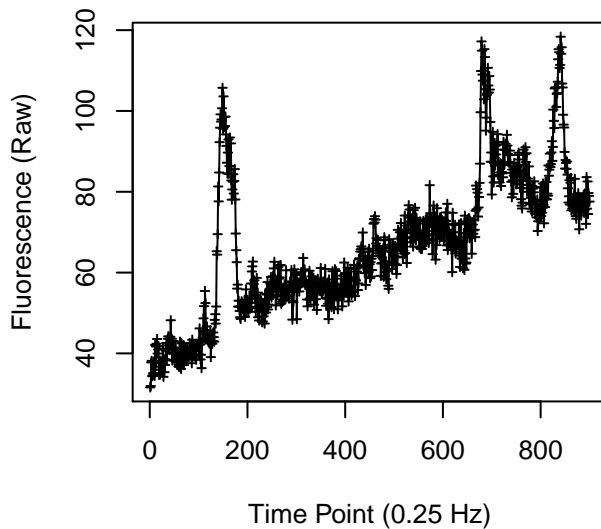

**Cell 895**

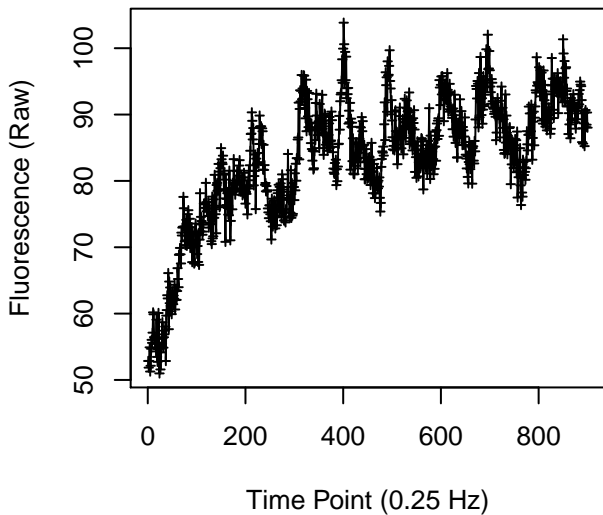

**Cell 896**

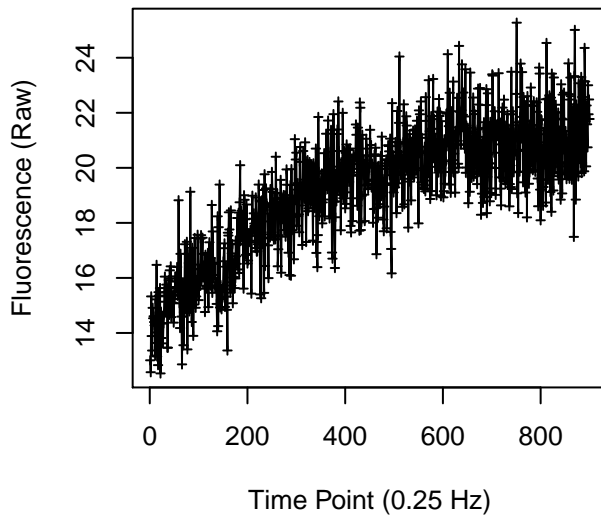

**Cell 897**

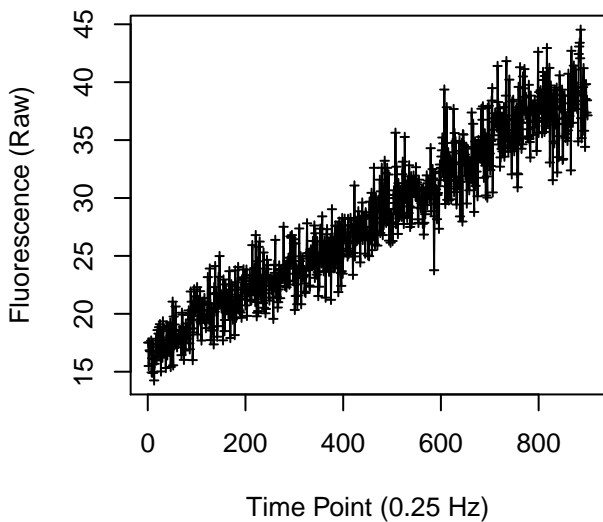

**Cell 898**

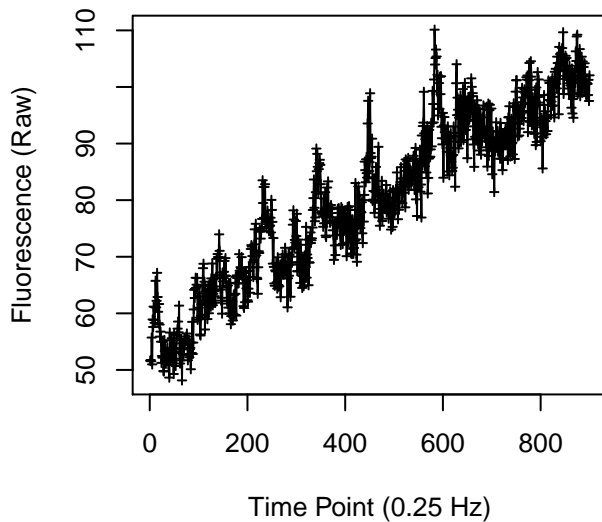

**Cell 899**

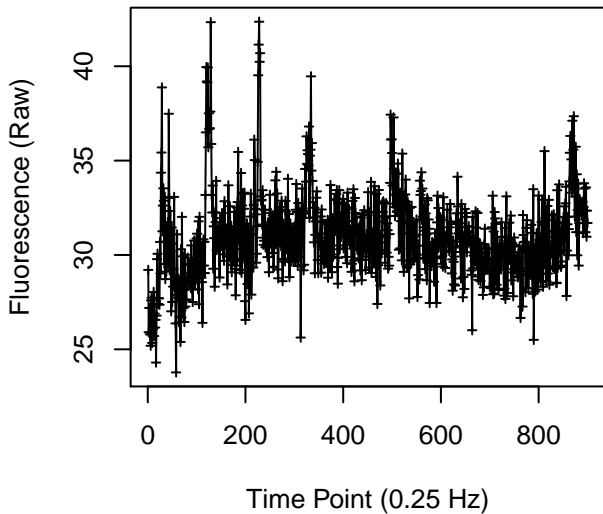

**Cell 900**

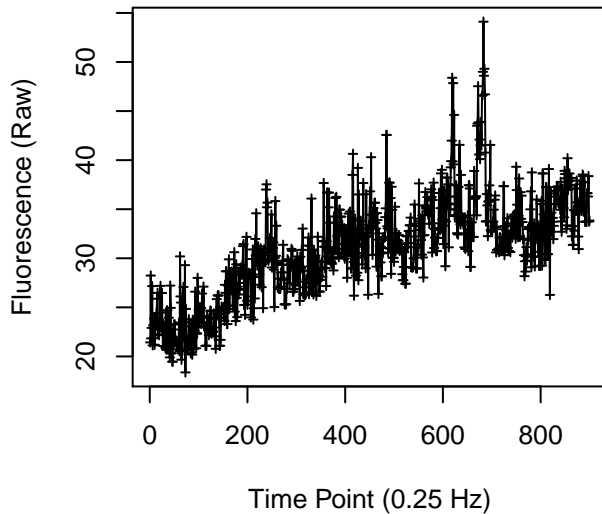

**Cell 901**

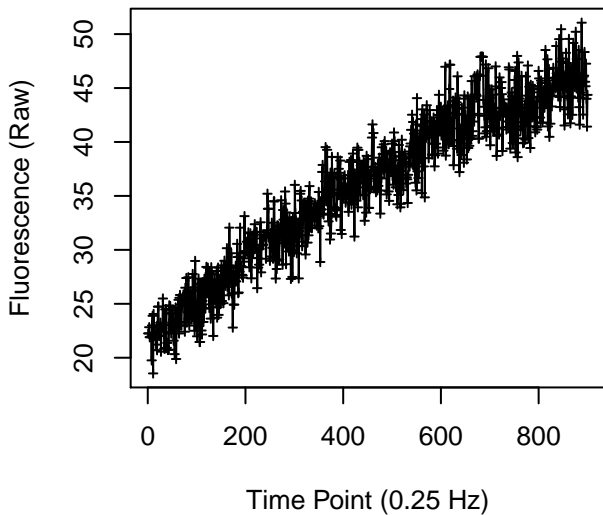

**Cell 902**

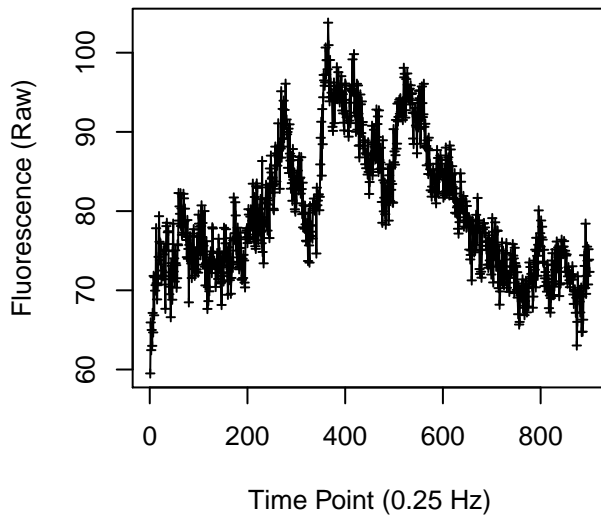

**Cell 903**

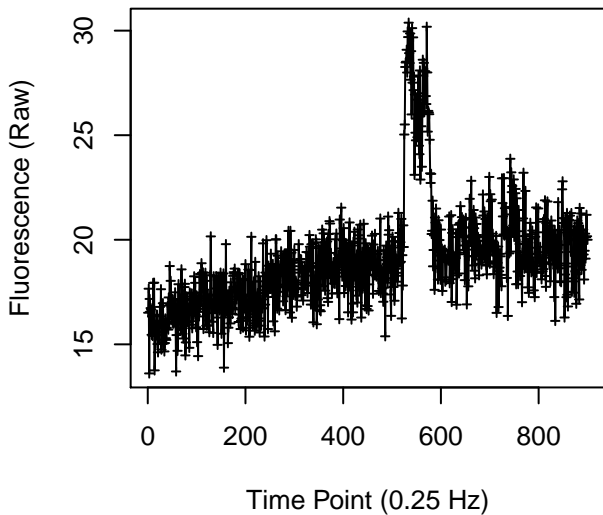

**Cell 904**

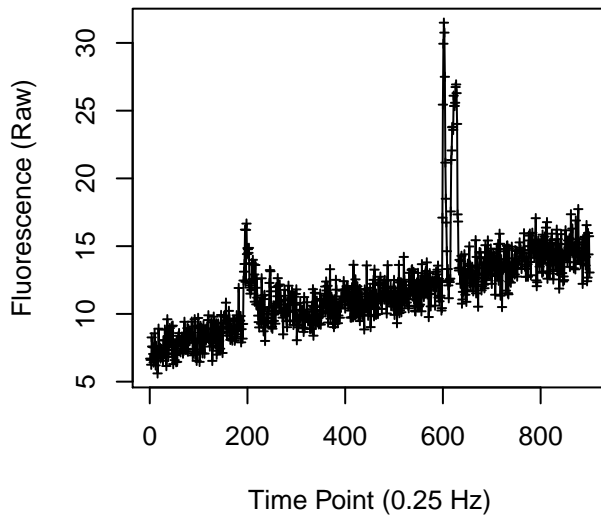



**Cell 905**

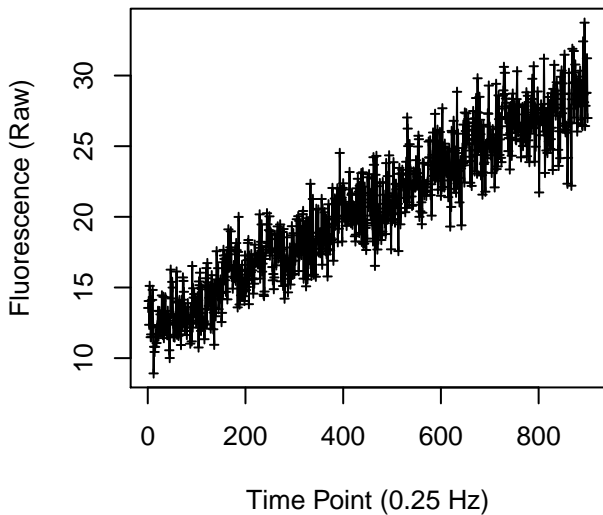

**Cell 906**

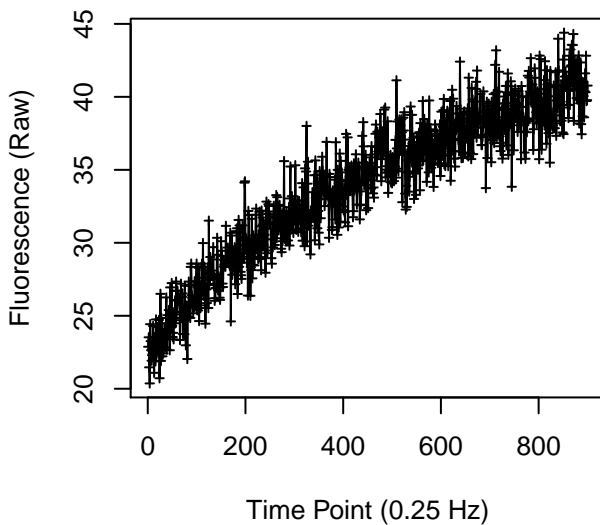

**Cell 907**

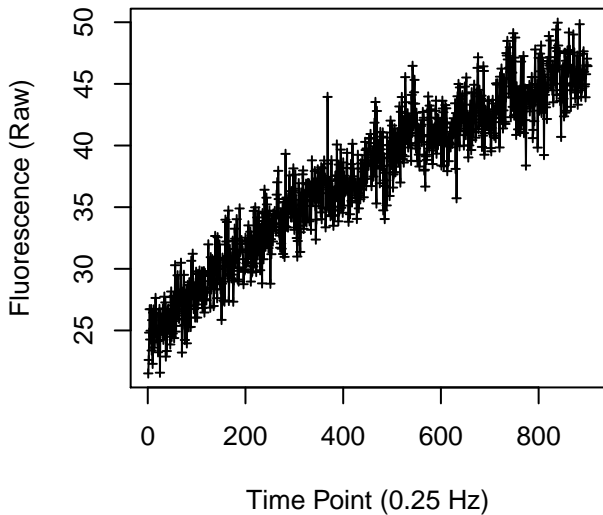

**Cell 908**

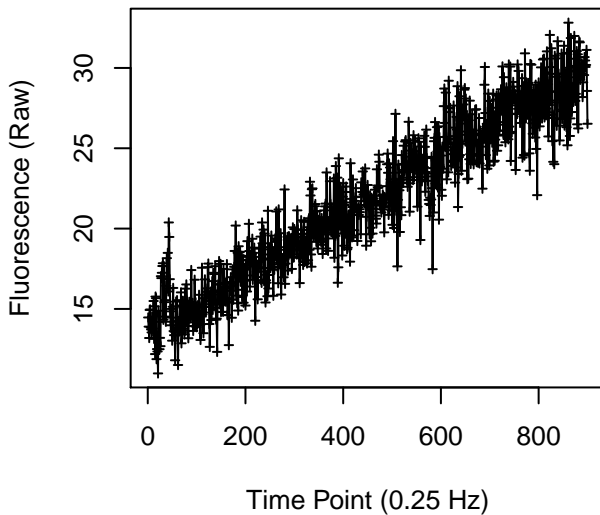

**Cell 909**

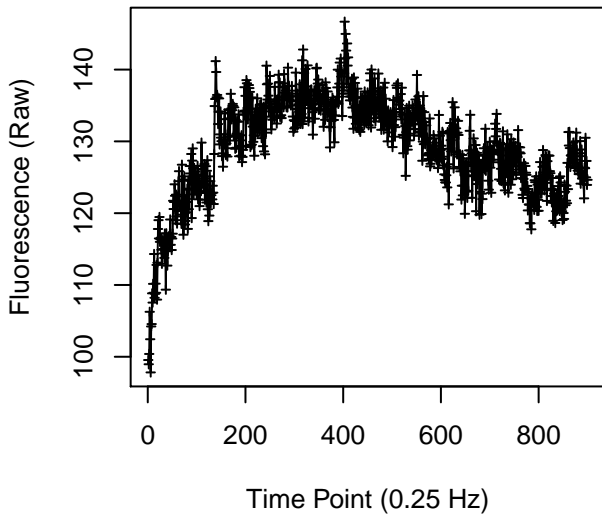

**Cell 910**

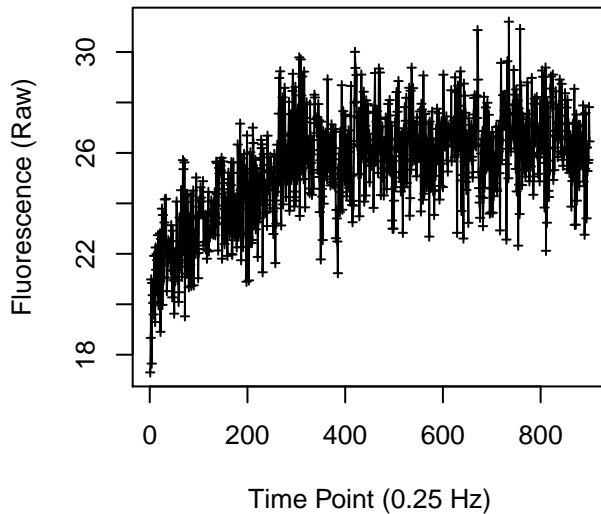

**Cell 911**

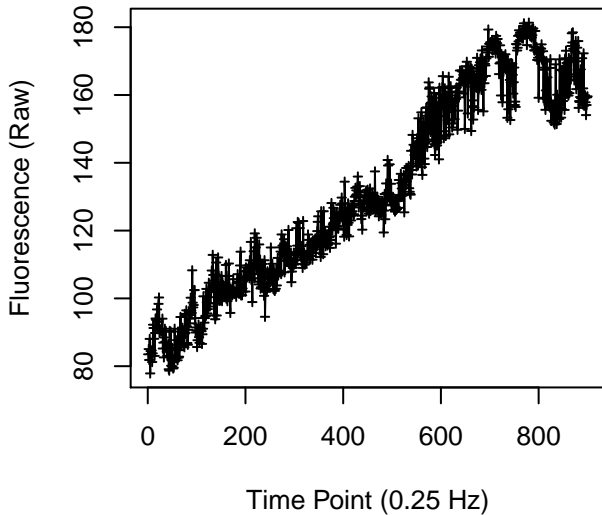

**Cell 912**

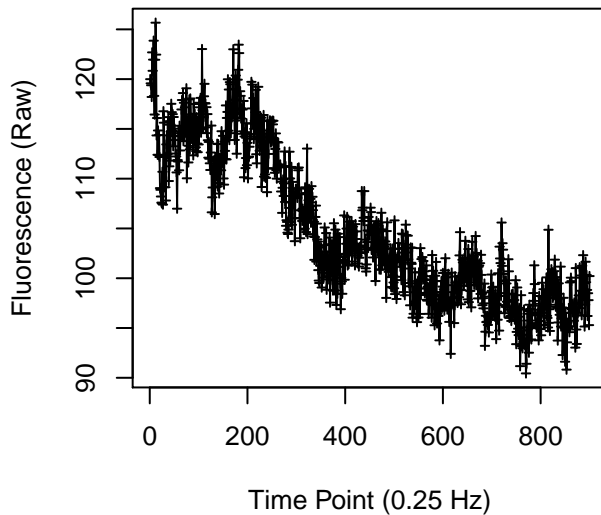

**Cell 913**

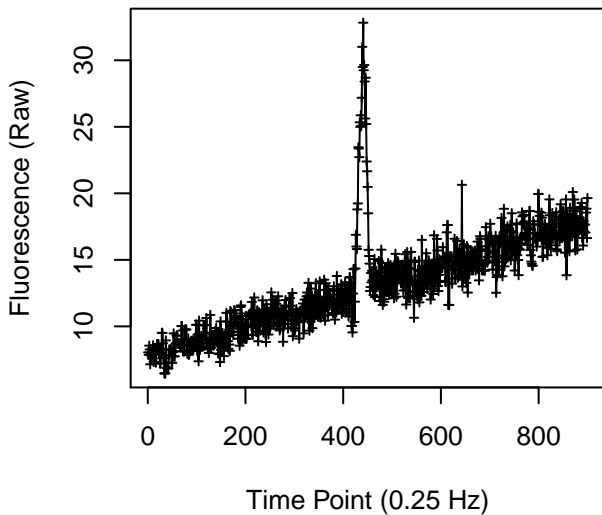

**Cell 914**

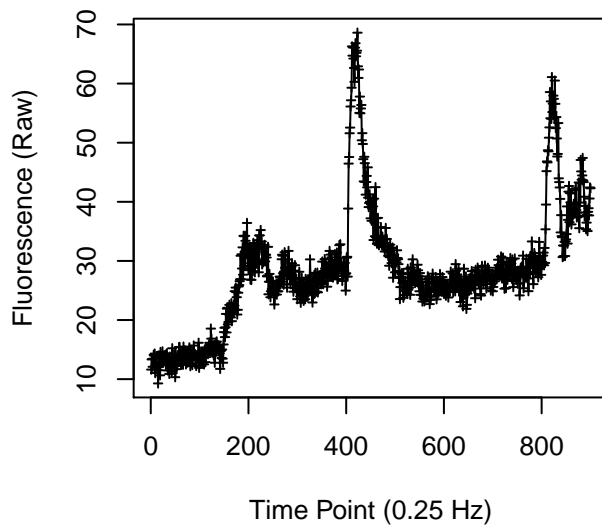

**Cell 915**

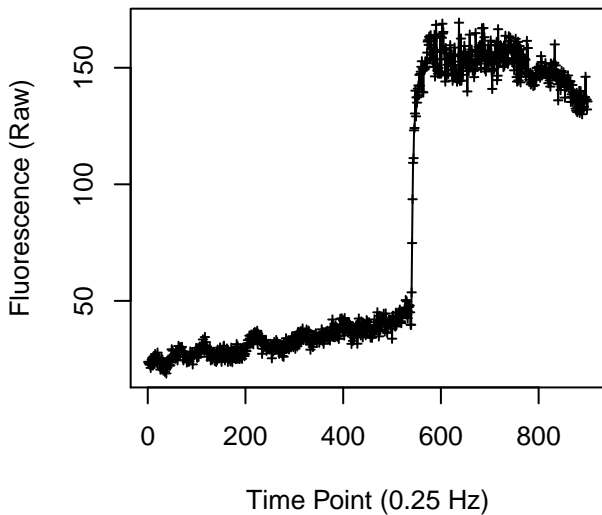

**Cell 916**

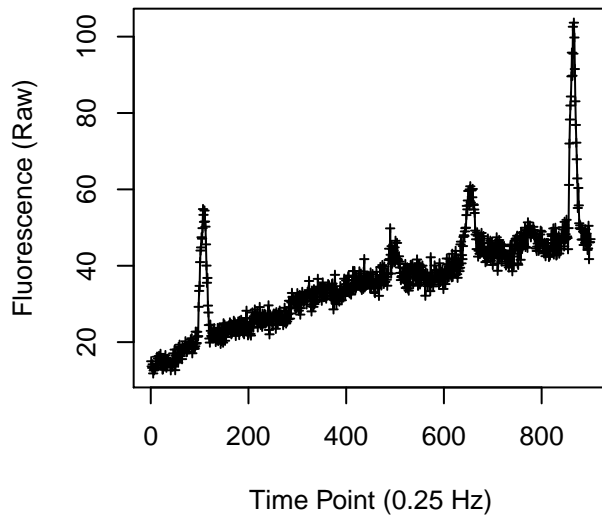

**Cell 917**

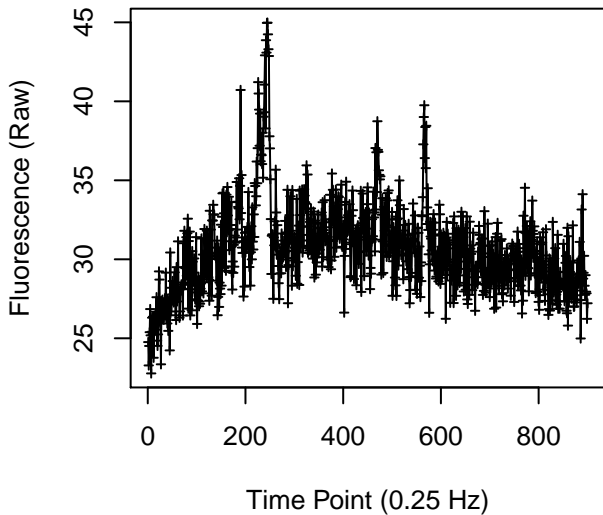

**Cell 918**

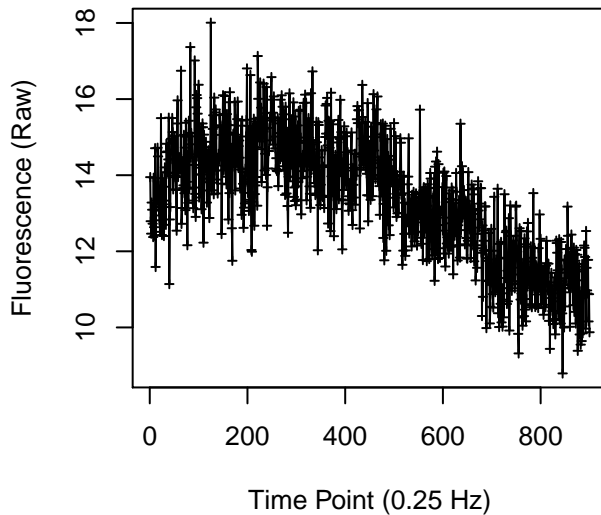

**Cell 919**

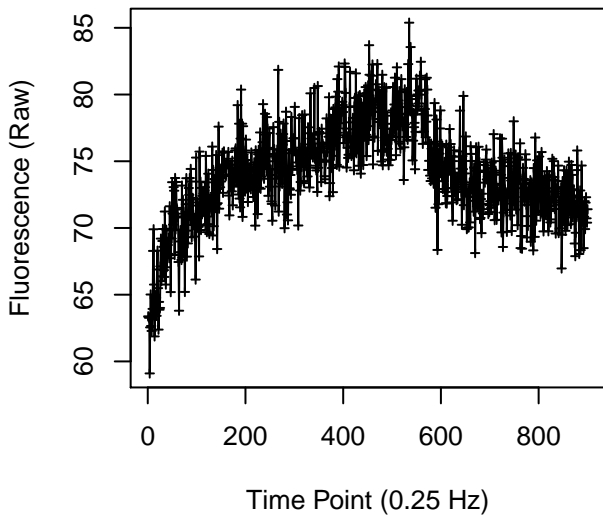

**Cell 920**

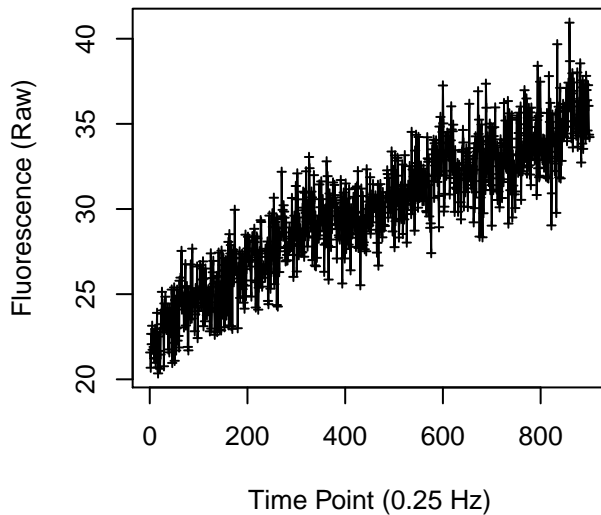

**Cell 921**

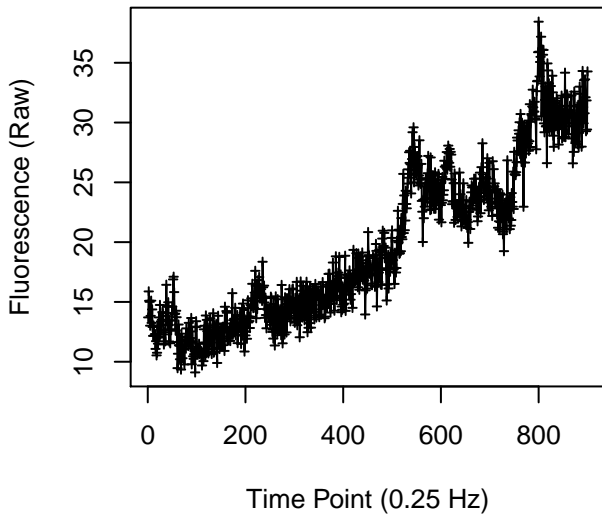

**Cell 922**

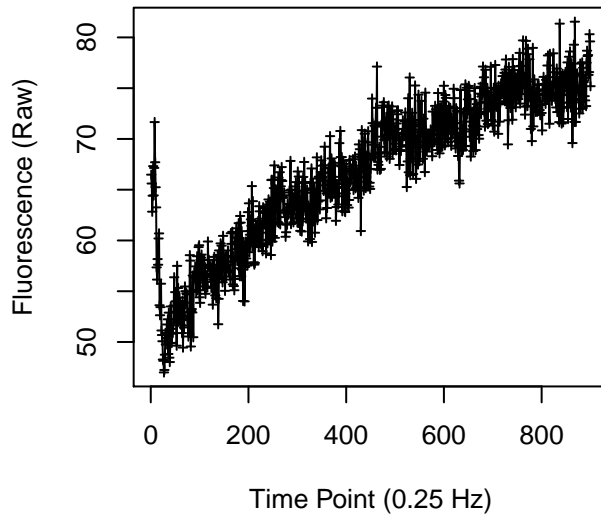

**Cell 923**

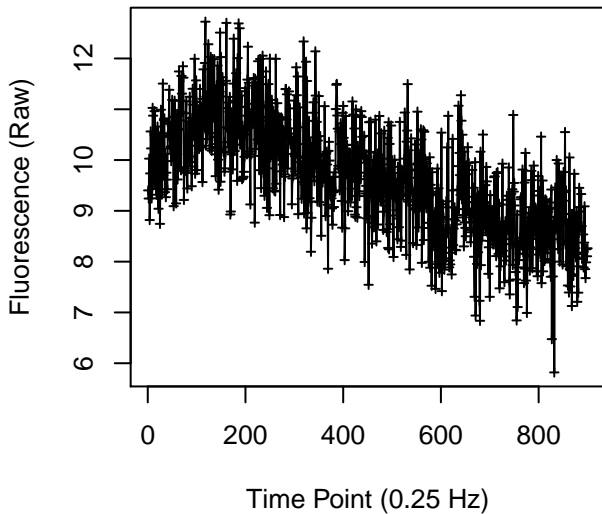

**Cell 924**

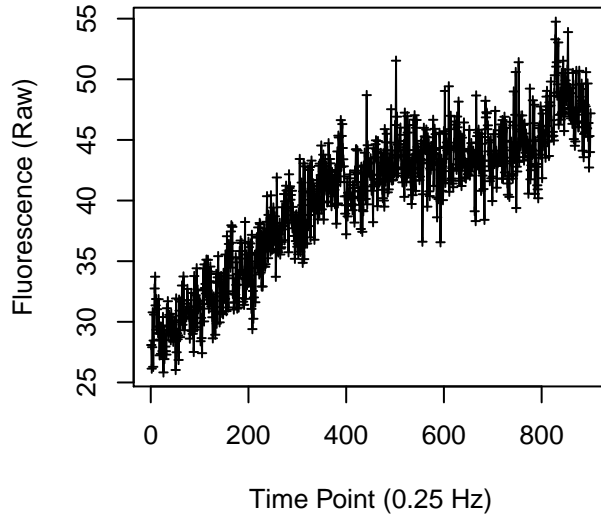

**Cell 925**

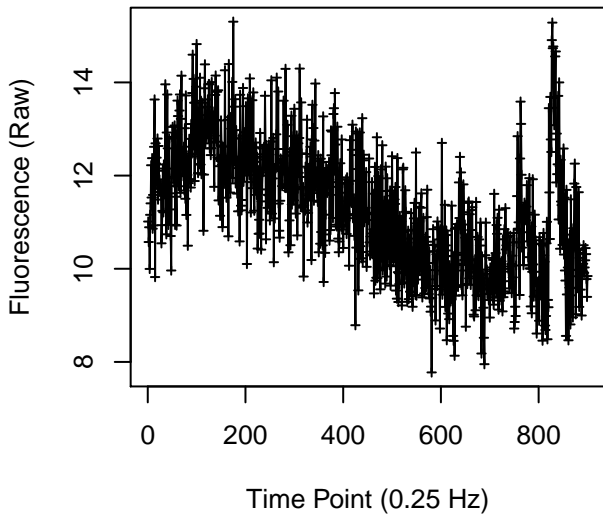

**Cell 926**

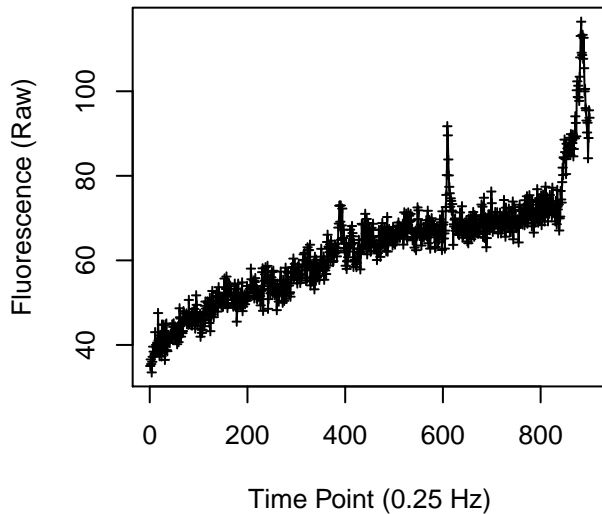

**Cell 927**

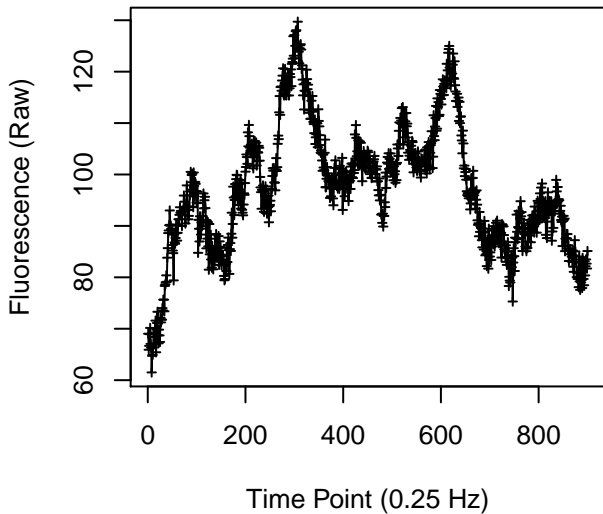

**Cell 928**

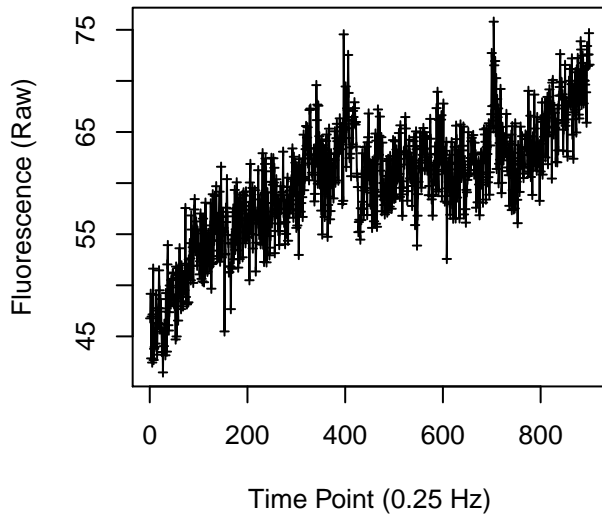

**Cell 929**

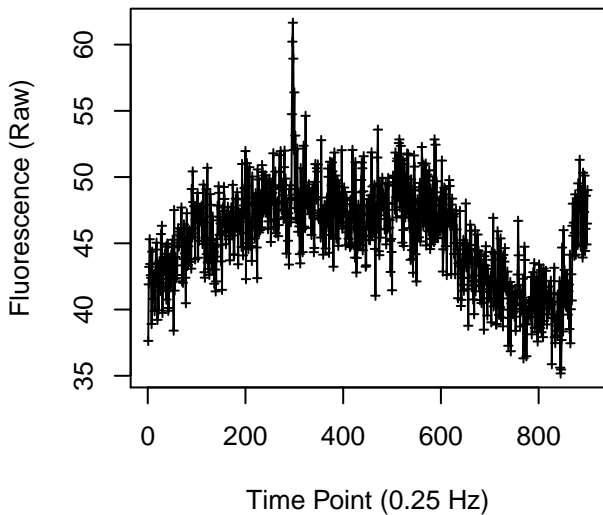

**Cell 930**

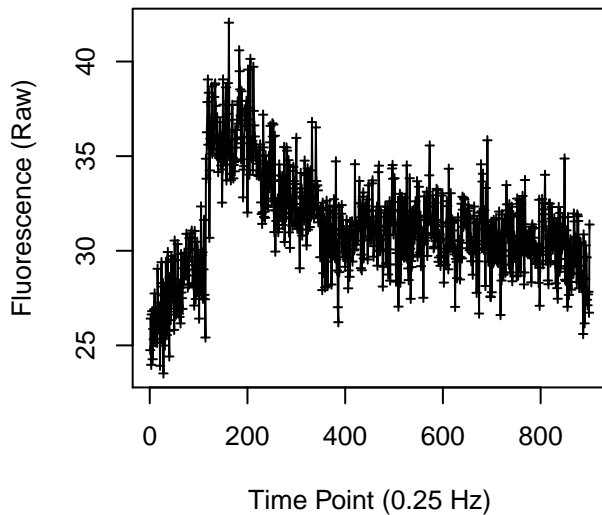

**Cell 931**

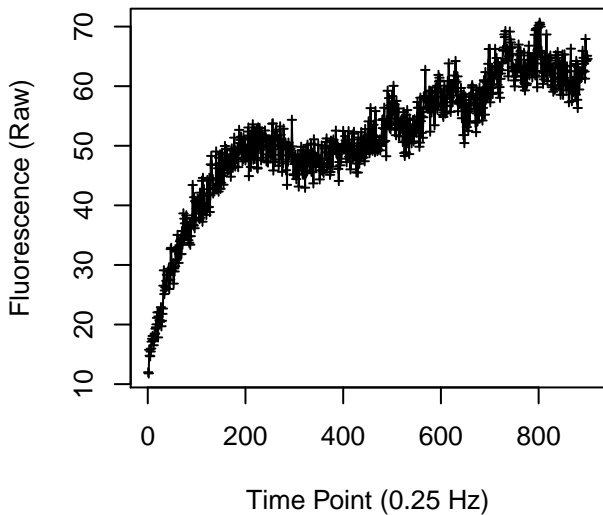

**Cell 932**

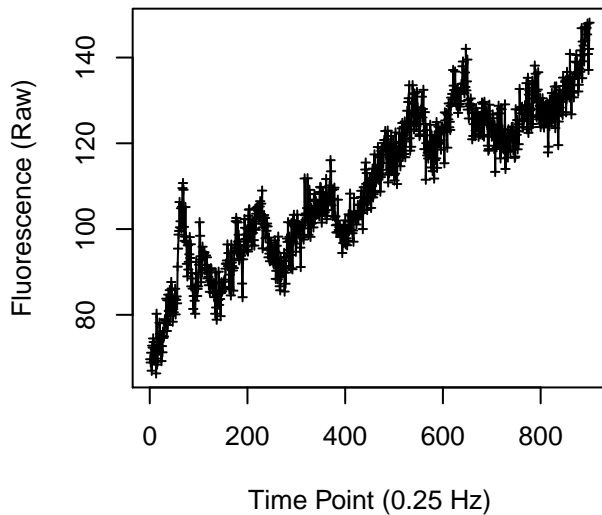

**Cell 933**

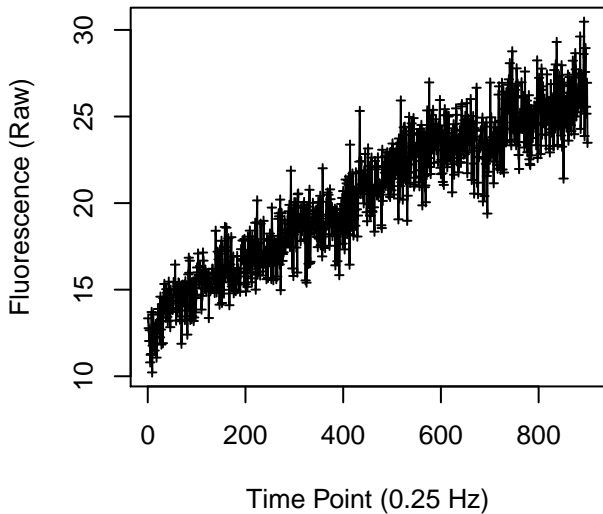

**Cell 934**

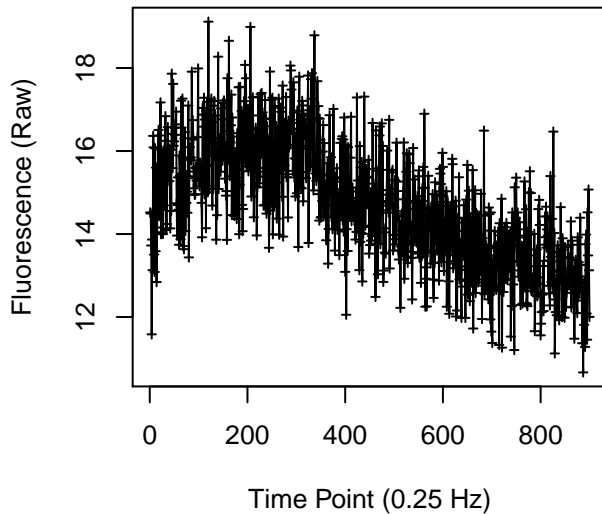

**Cell 935**

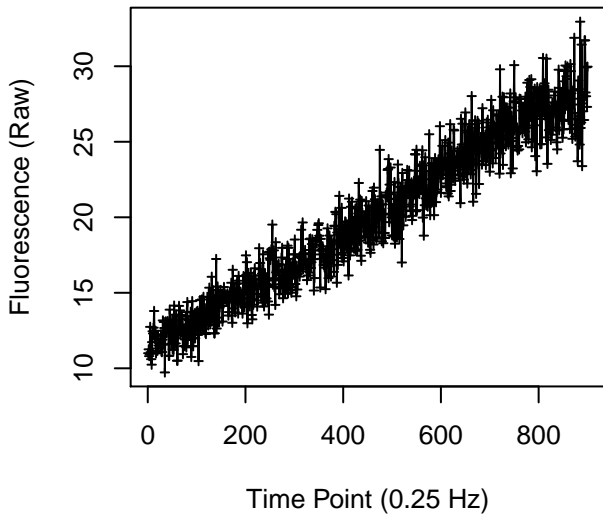

**Cell 936**

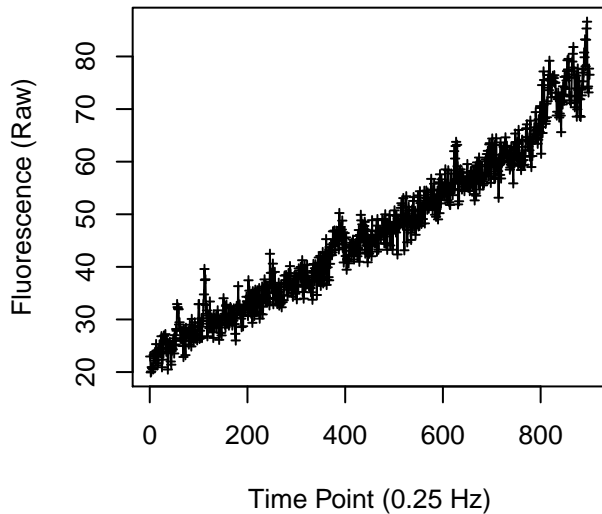



**Cell 937**

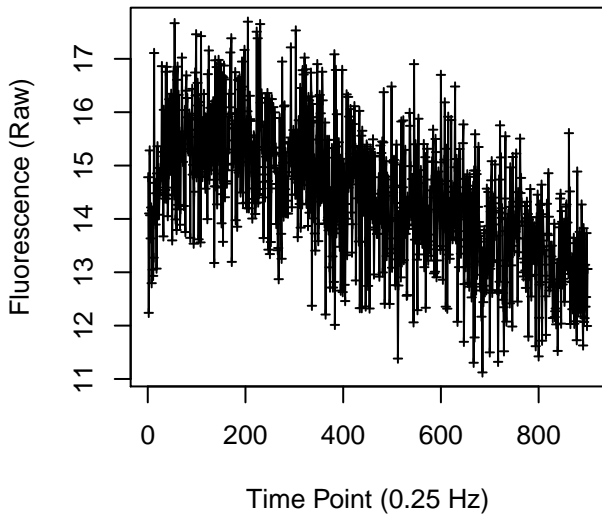

**Cell 938**

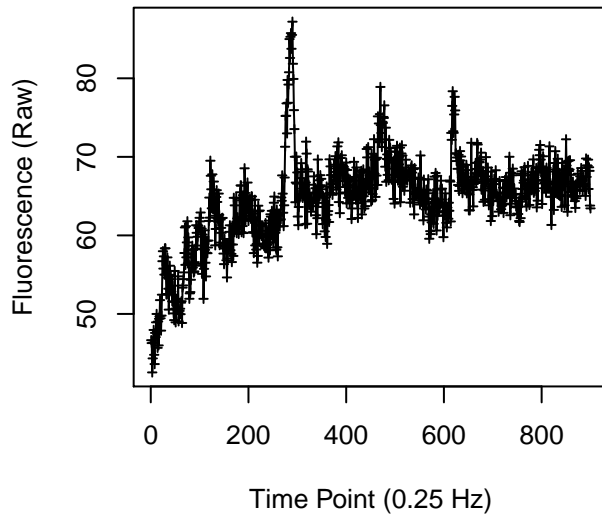

**Cell 939**

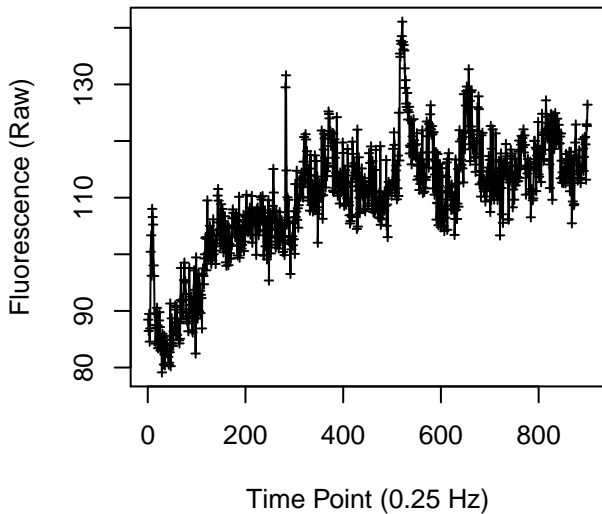

**Cell 940**

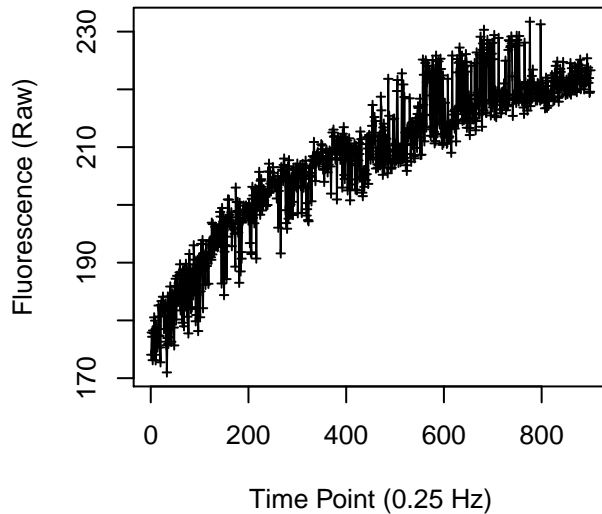

**Cell 941**

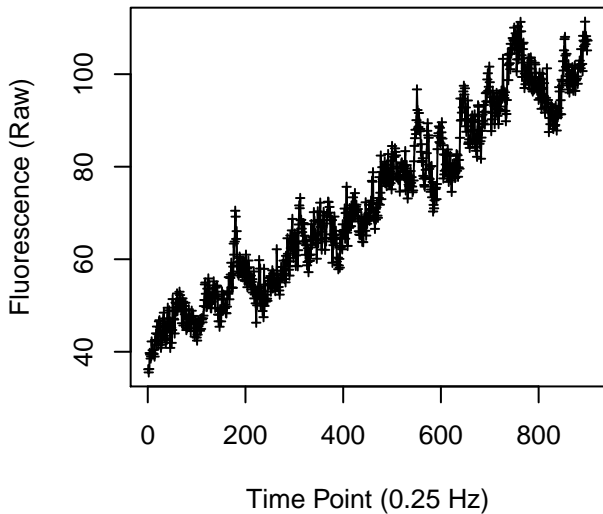

**Cell 942**

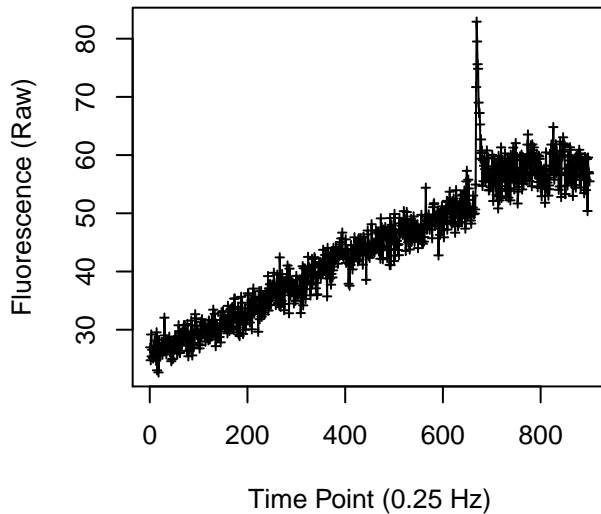

**Cell 943**

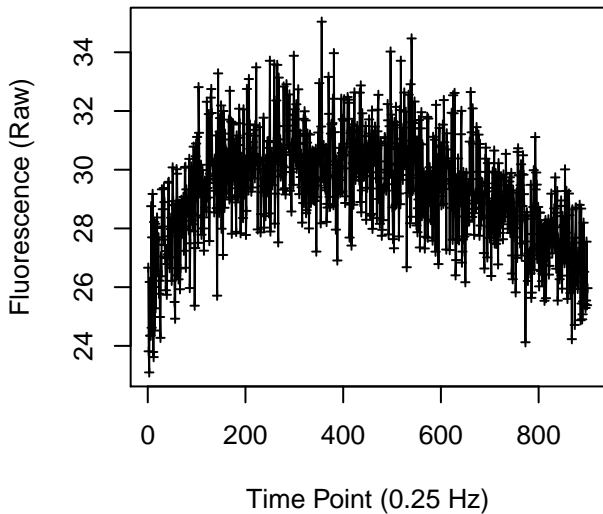

**Cell 944**

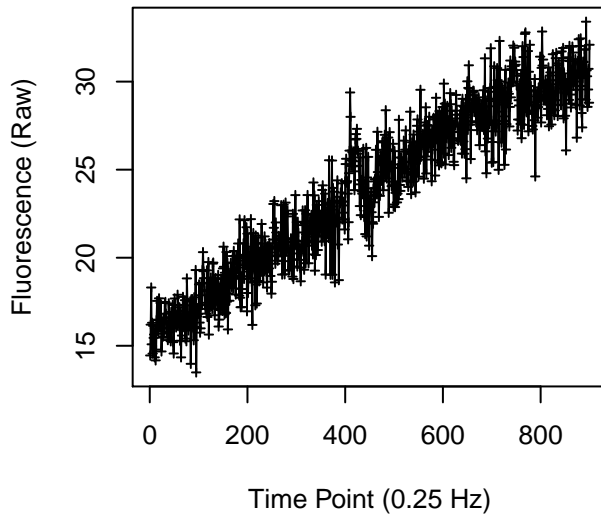

**Cell 945**

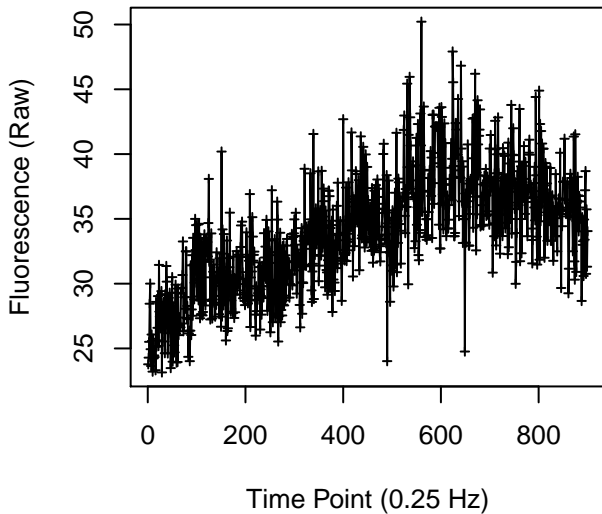

**Cell 946**

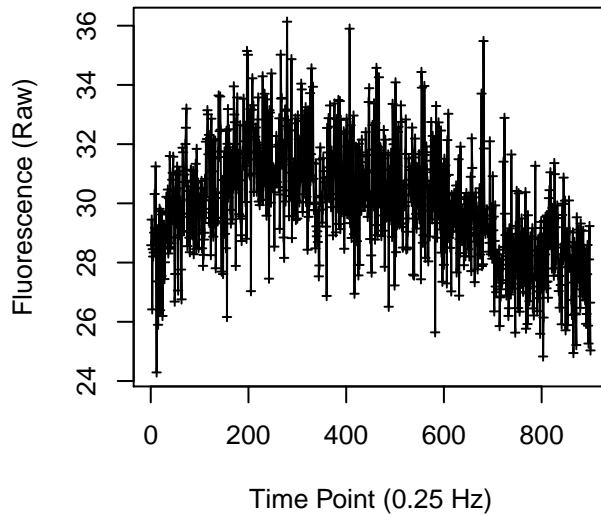

**Cell 947**

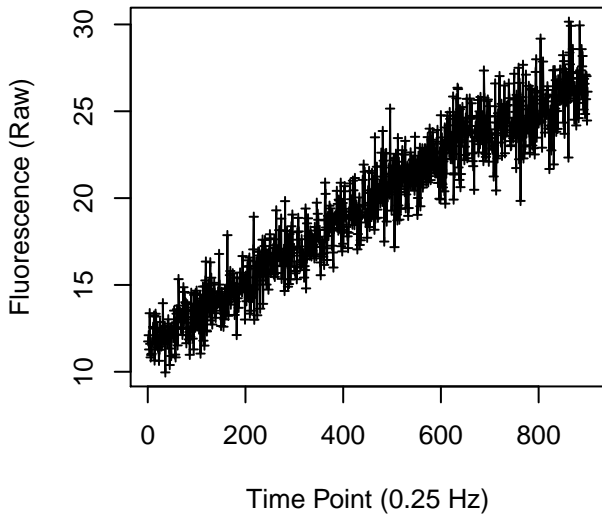

**Cell 948**

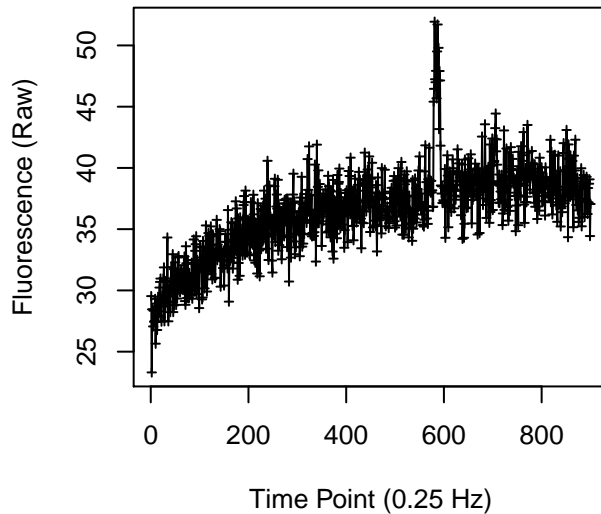

**Cell 949**

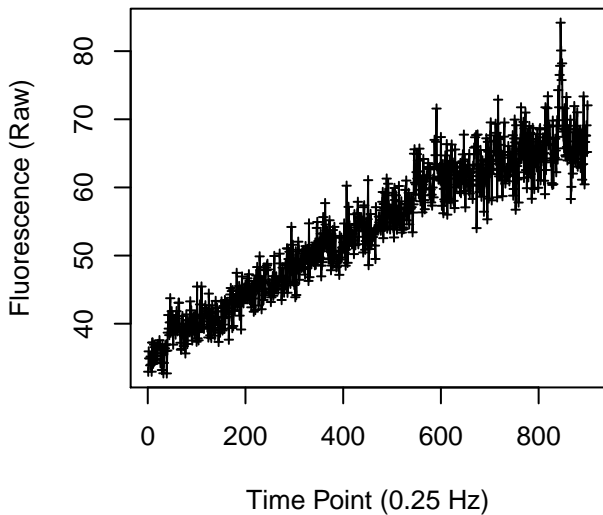

**Cell 950**

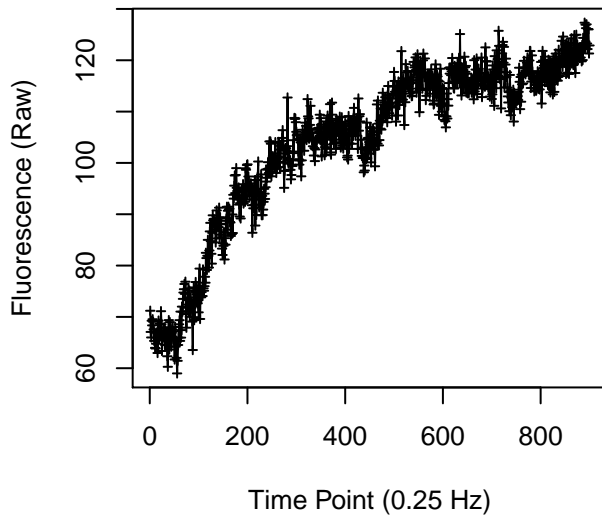

**Cell 951**

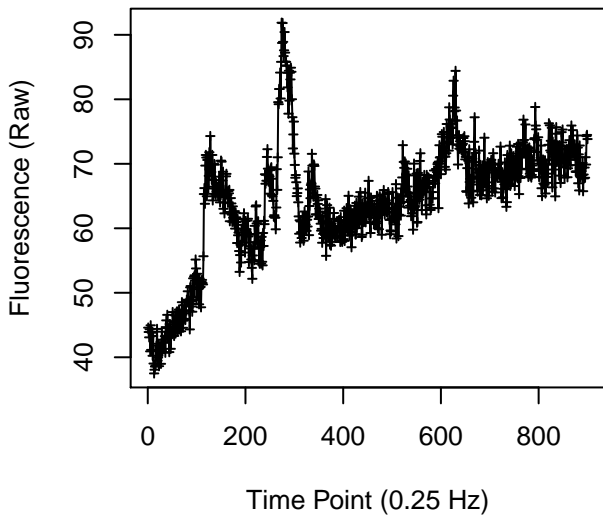

**Cell 952**

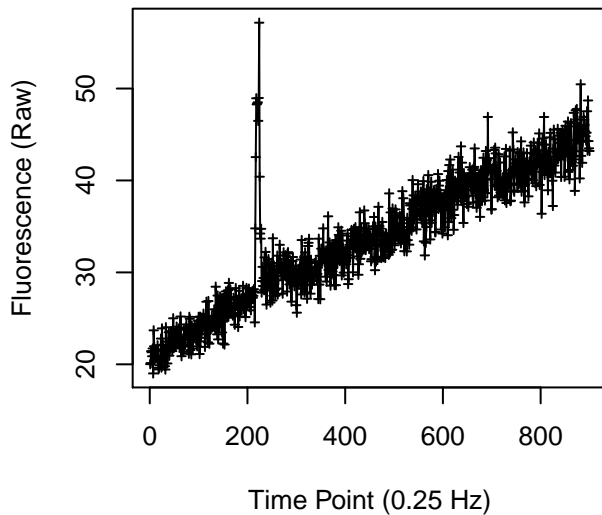

**Cell 953**

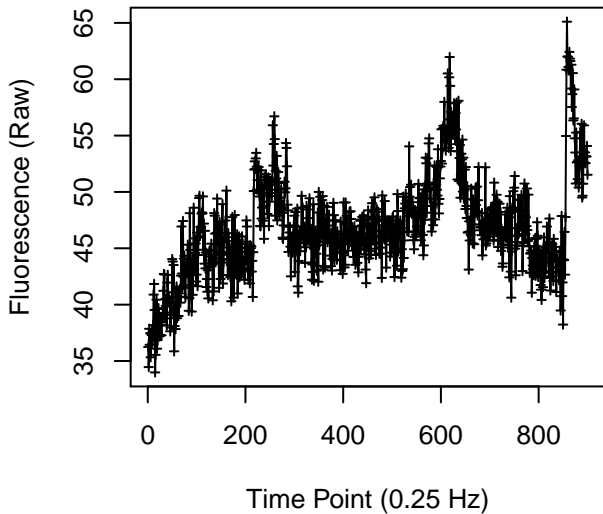

**Cell 954**

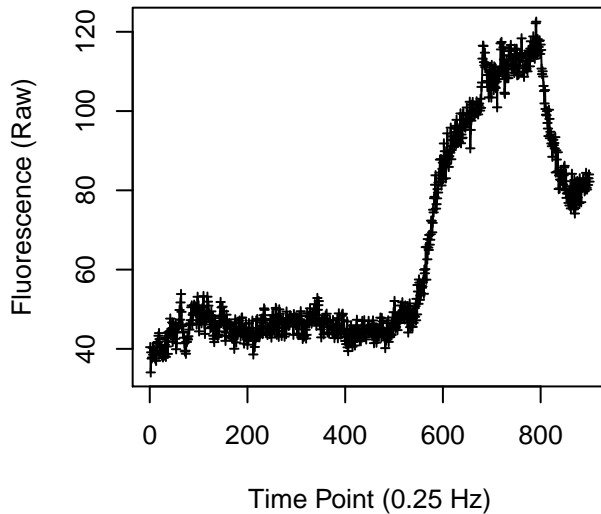

**Cell 955**

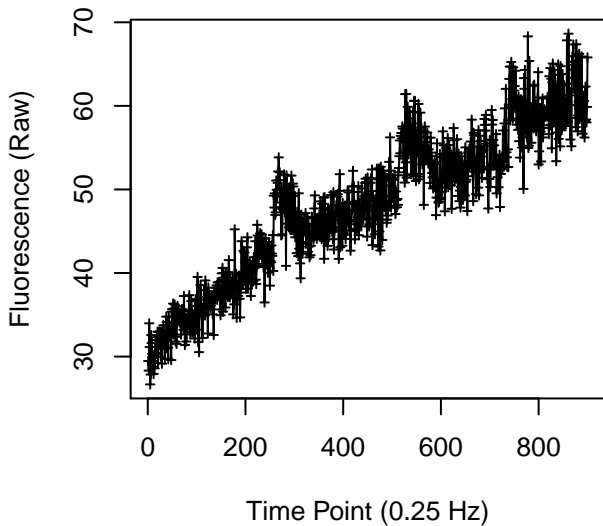

**Cell 956**

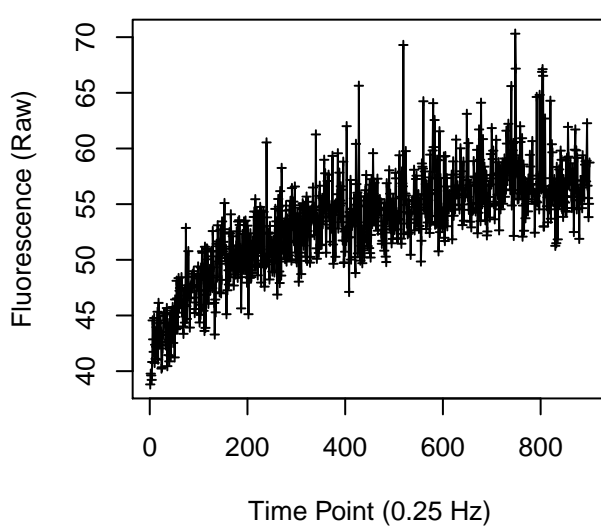

**Cell 957**

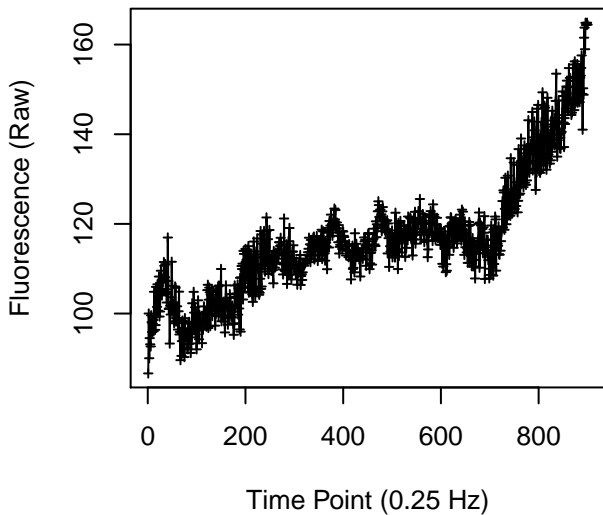

**Cell 958**

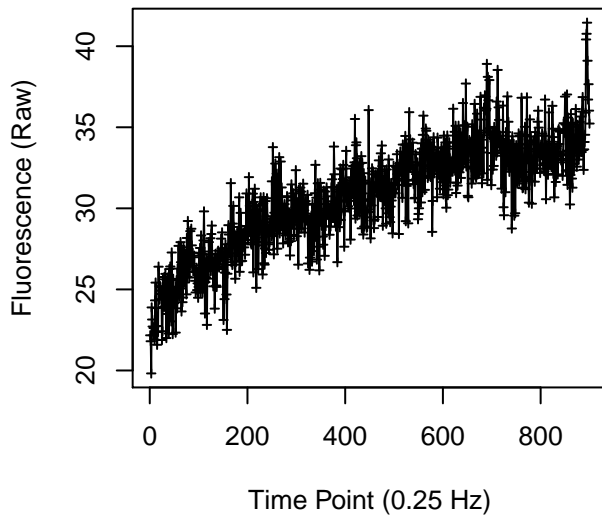

**Cell 959**

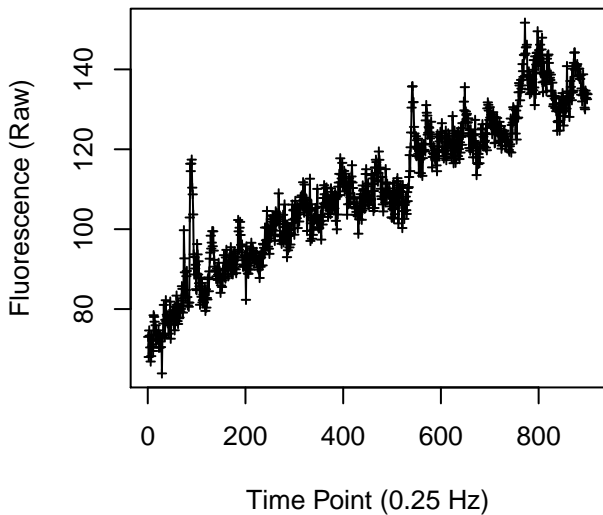

**Cell 960**

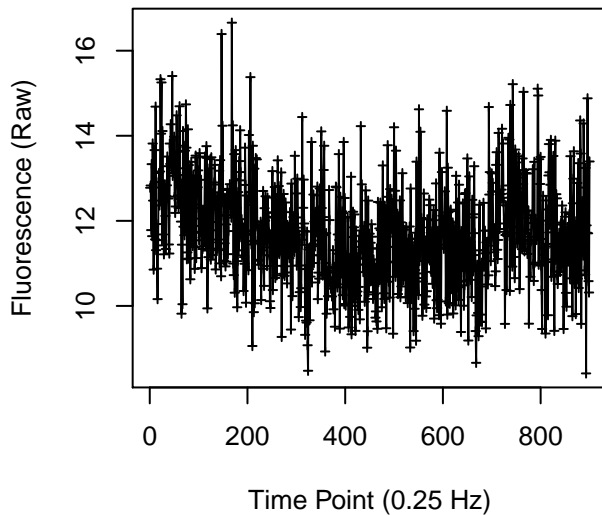

**Cell 961**

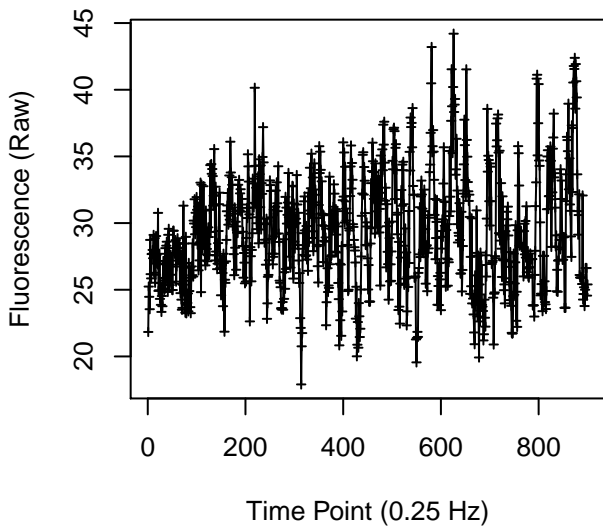

**Cell 962**

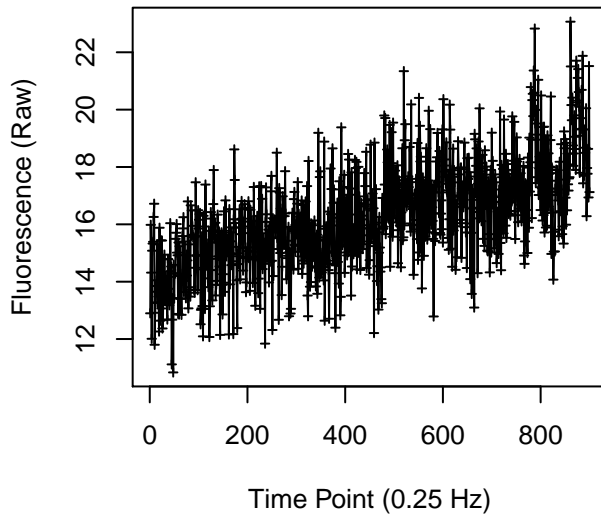

**Cell 963**

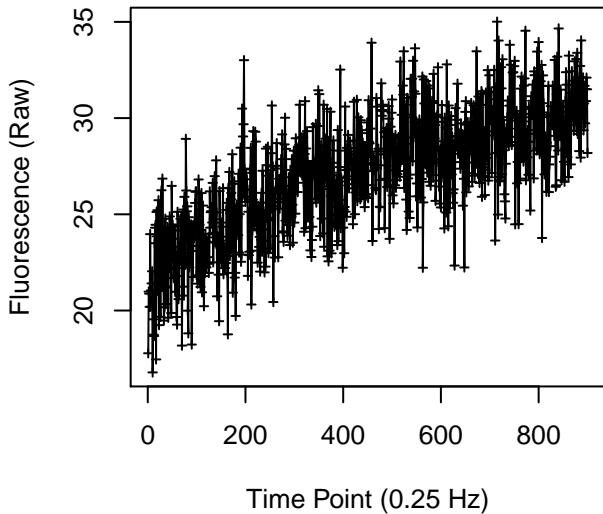

**Cell 964**

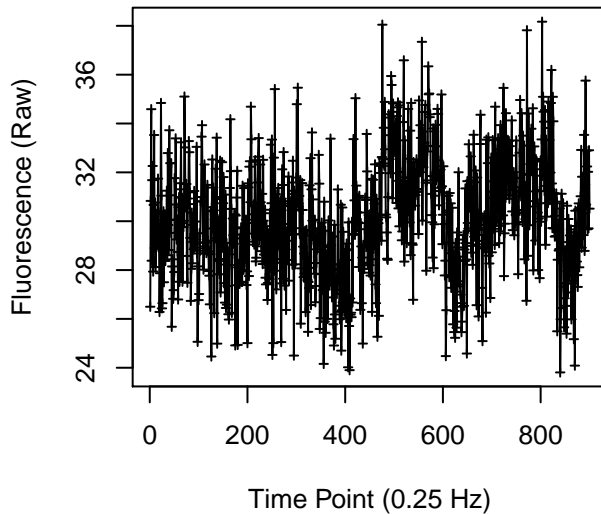

**Cell 965**

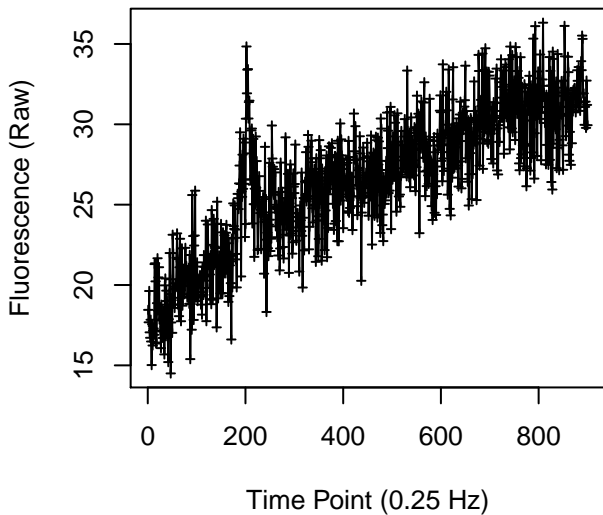

**Cell 966**

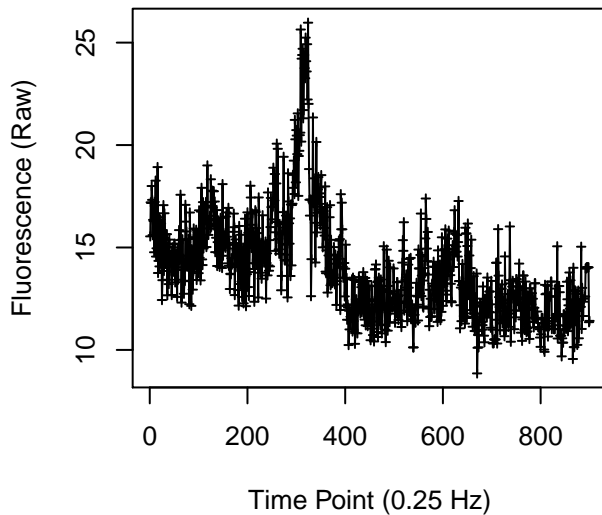

**Cell 967**

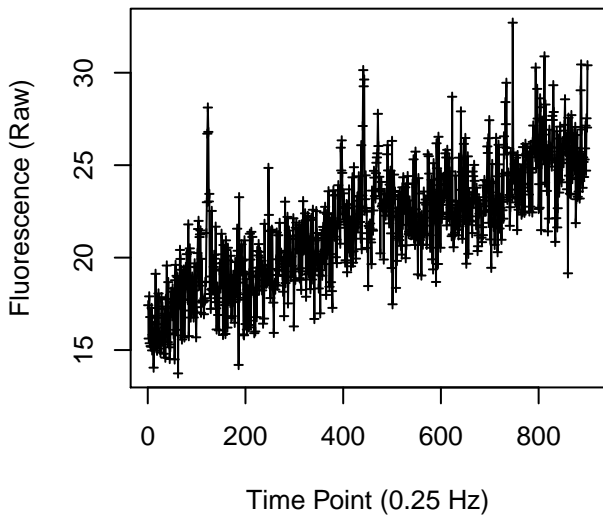

**Cell 968**

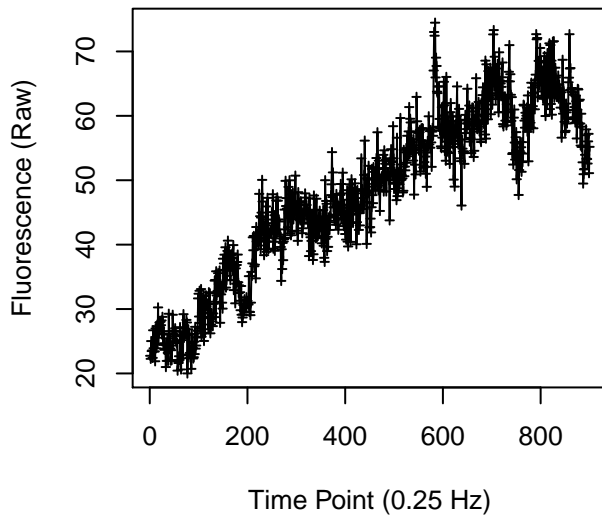



**Cell 969**

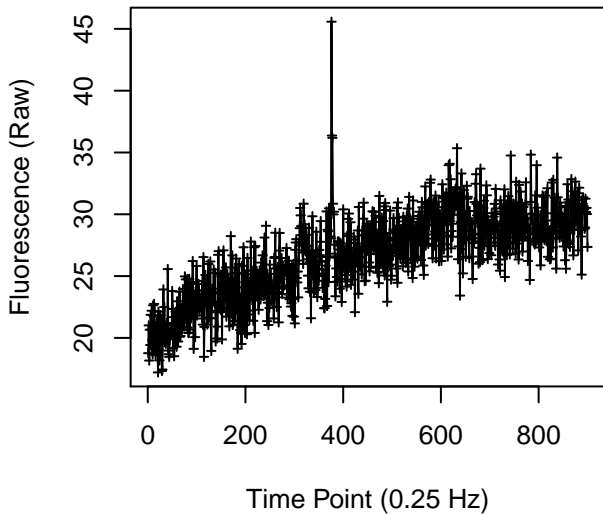

**Cell 970**

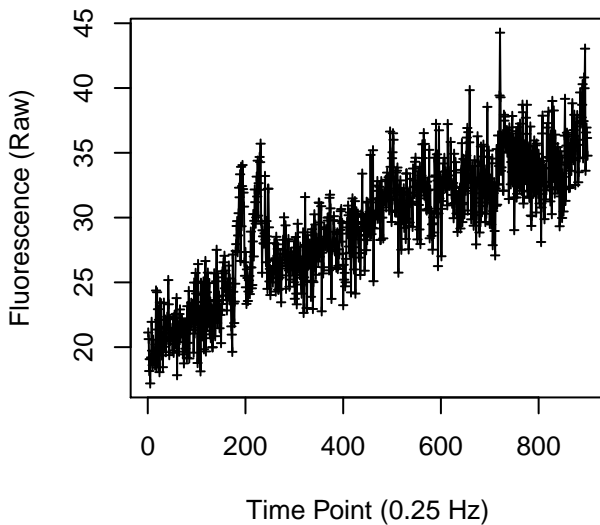

**Cell 971**

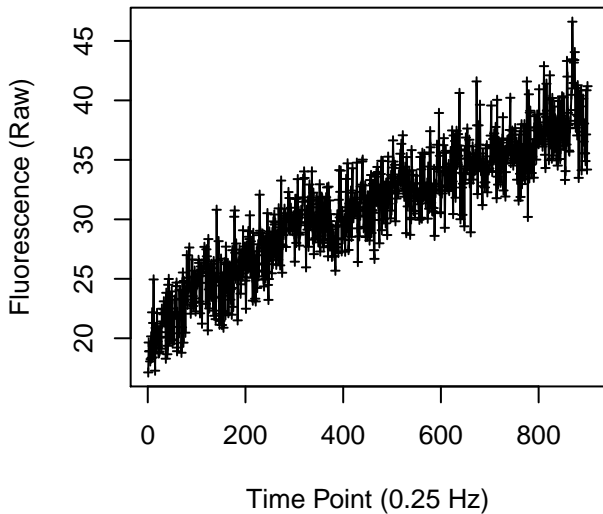

**Cell 972**

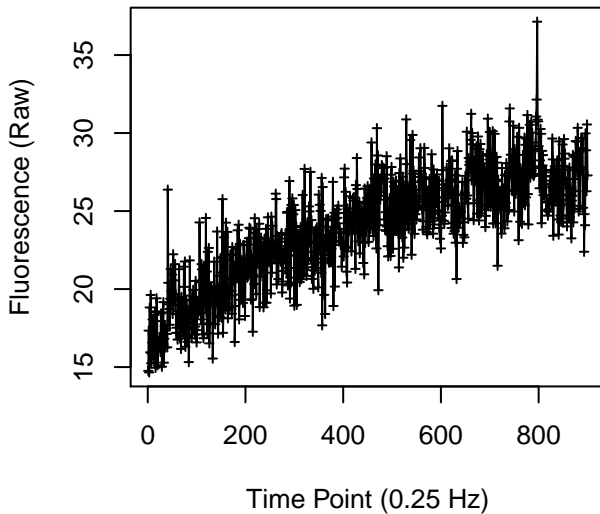

**Cell 973**

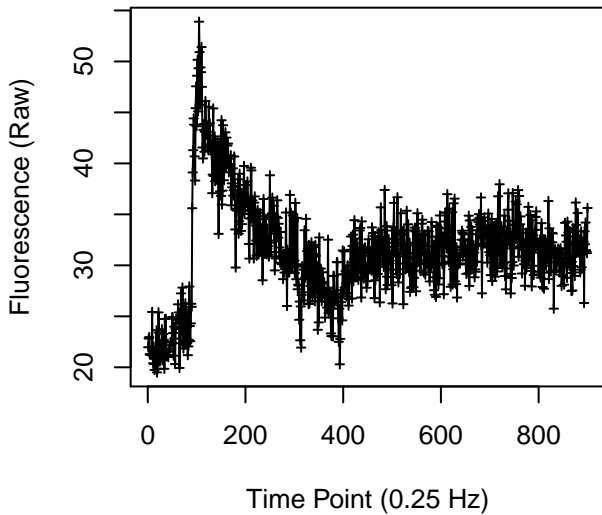

**Cell 974**

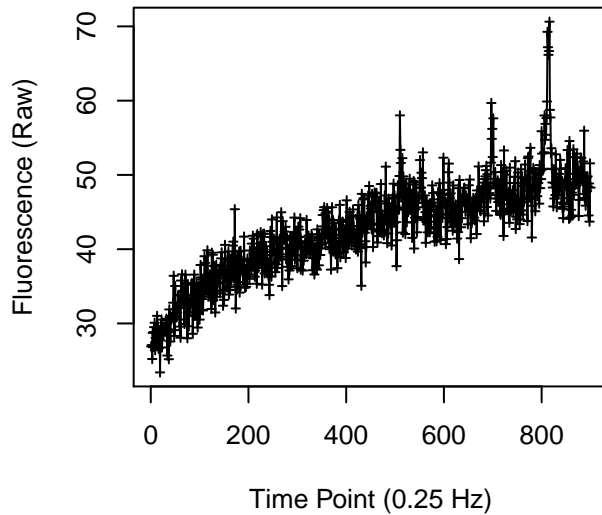

**Cell 975**

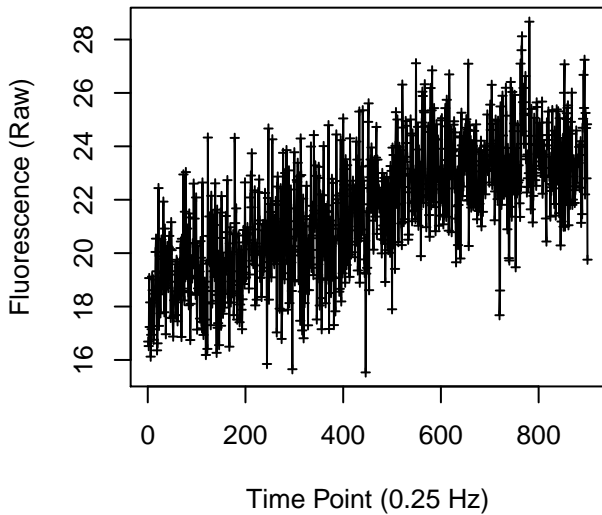

**Cell 976**

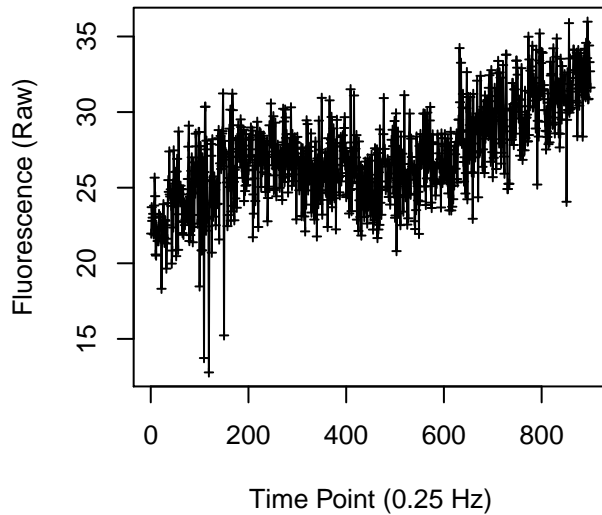

**Cell 977**

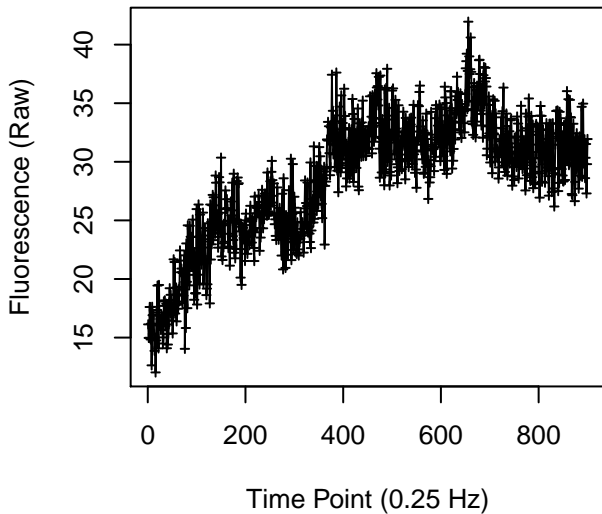

**Cell 978**

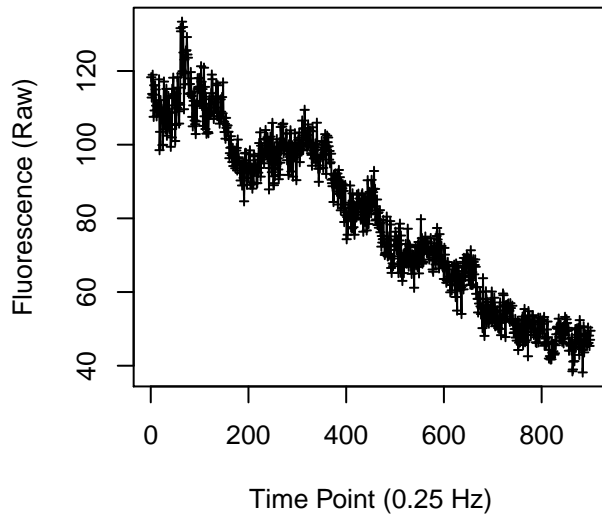

**Cell 979**

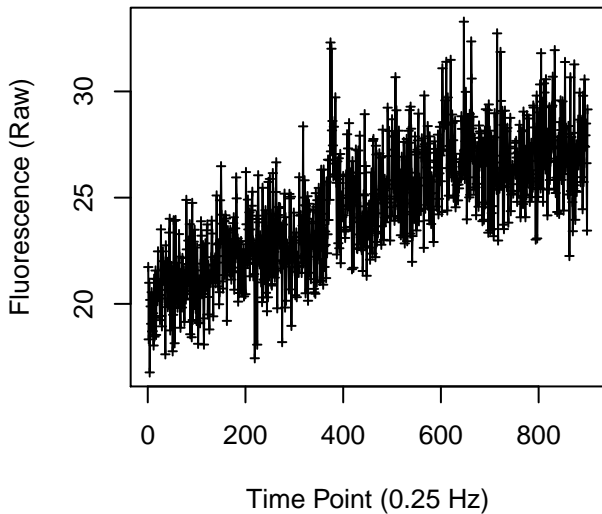

**Cell 980**

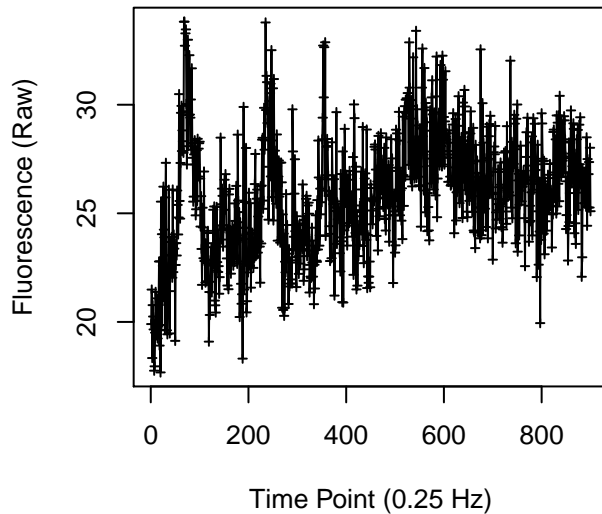

**Cell 981**

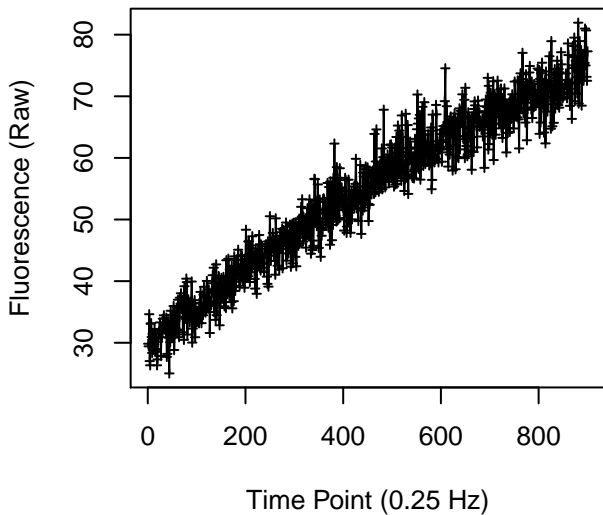

**Cell 982**

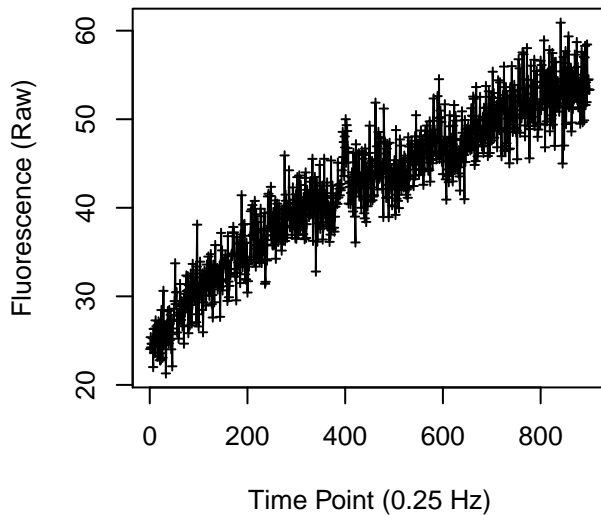

**Cell 983**

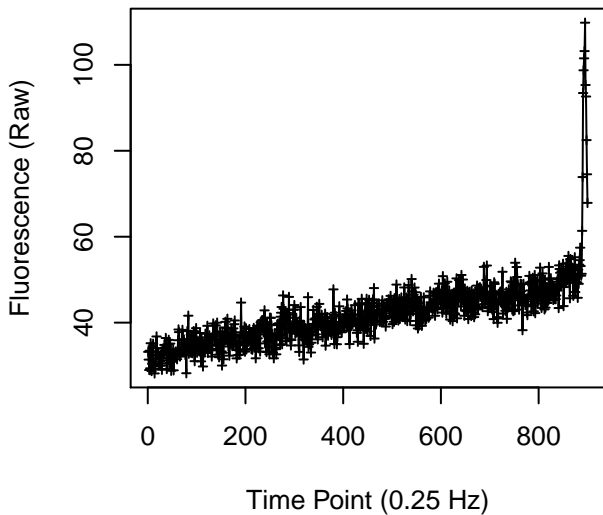

**Cell 984**

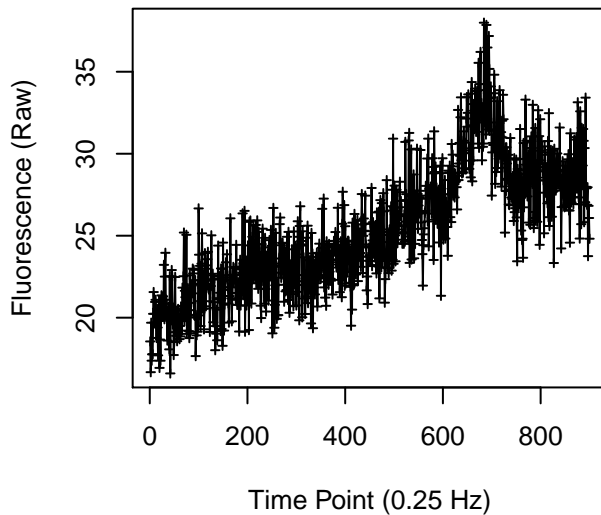

**Cell 985**

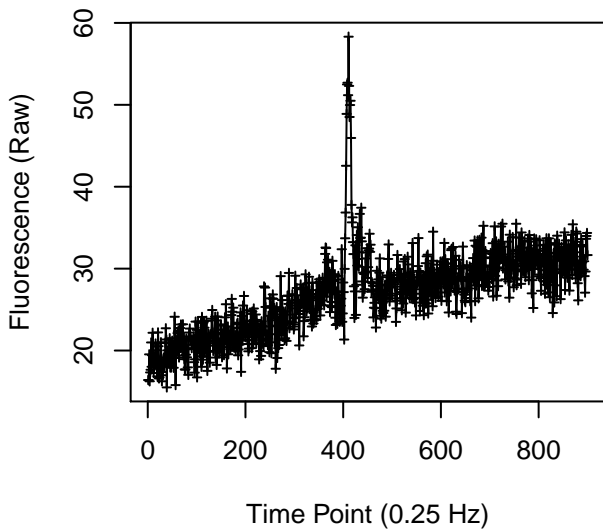

**Cell 986**

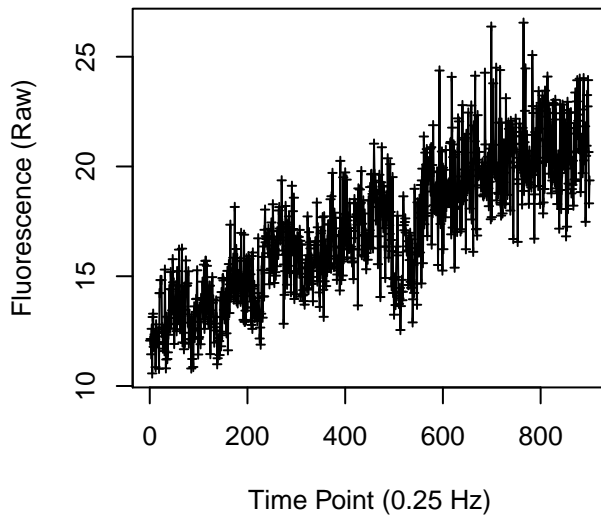

**Cell 987**

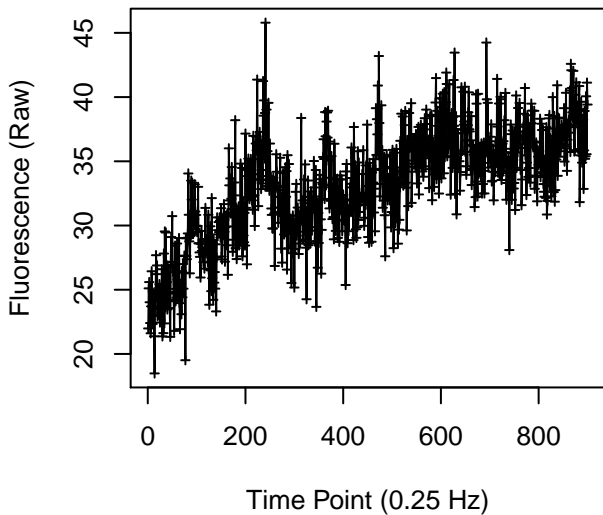

**Cell 988**

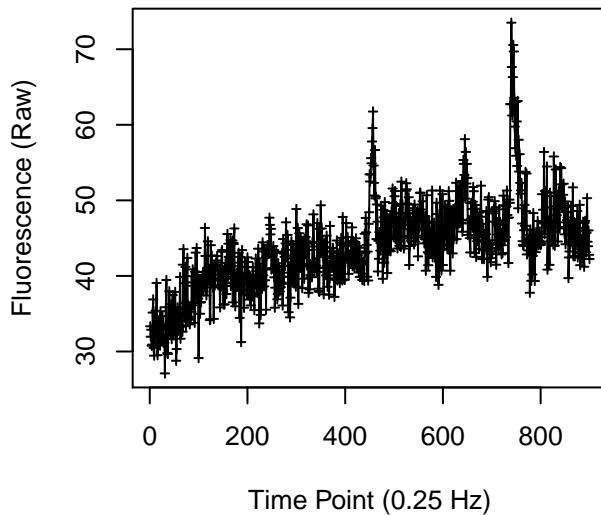

**Cell 989**

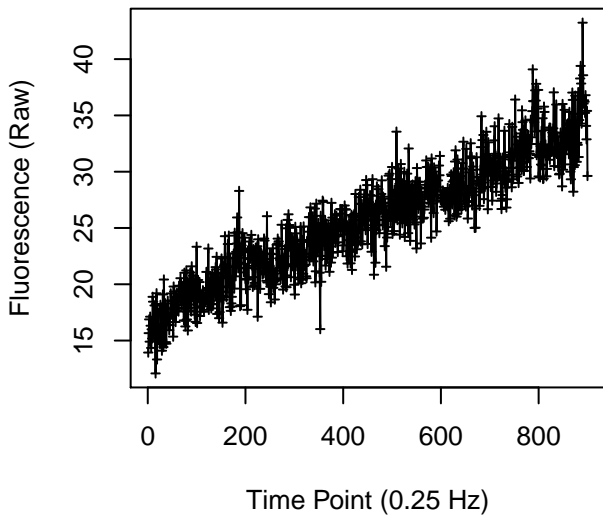

**Cell 990**

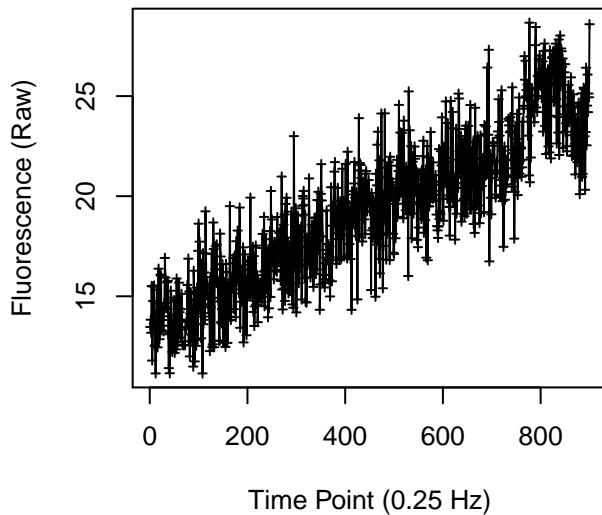

**Cell 991**

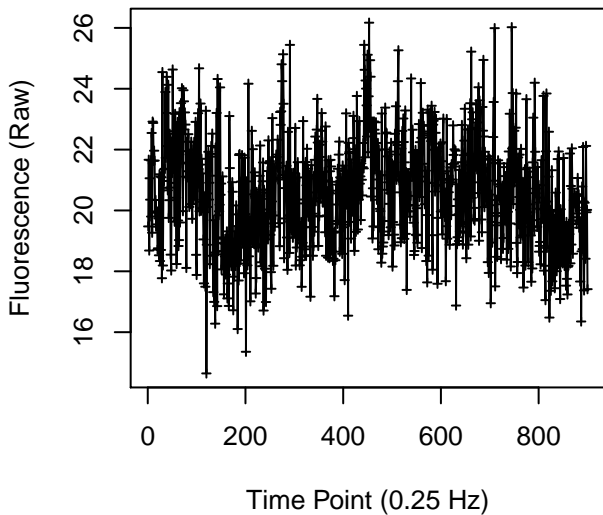

**Cell 992**

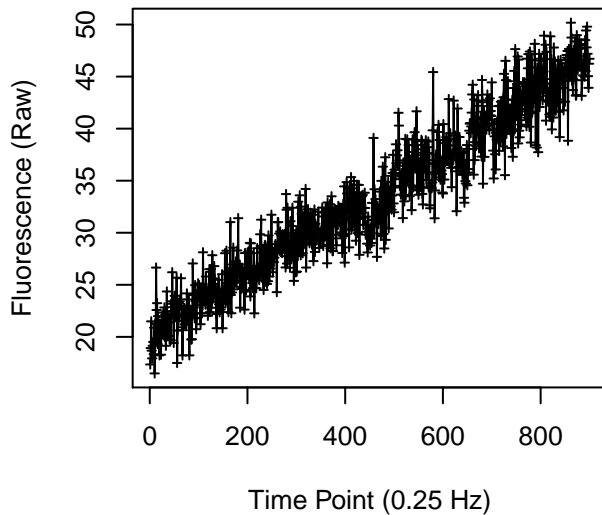

**Cell 993**

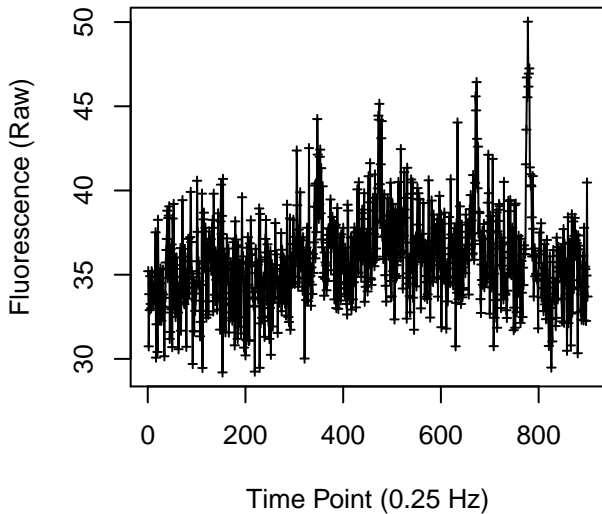

**Cell 994**

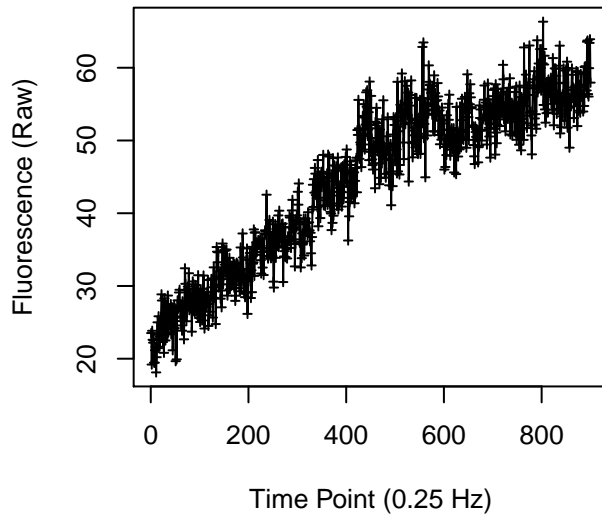

**Cell 995**

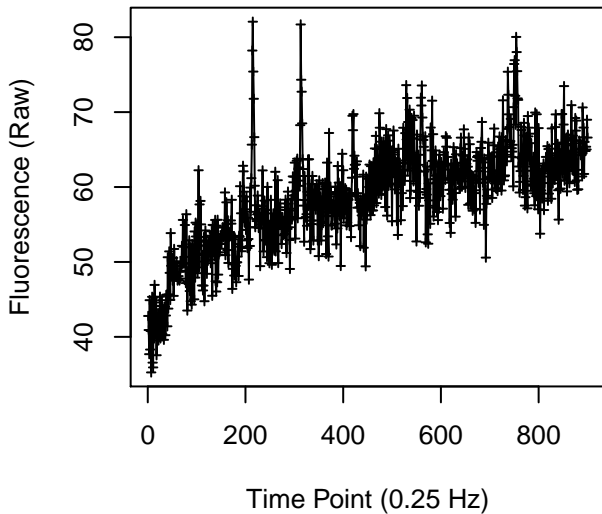

**Cell 996**

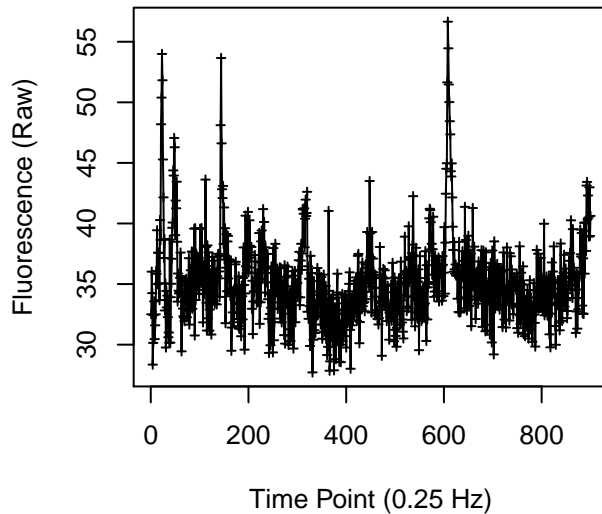

**Cell 997**

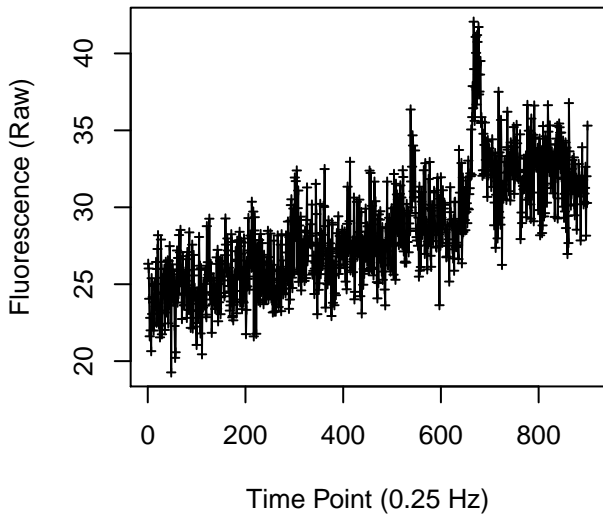

**Cell 998**

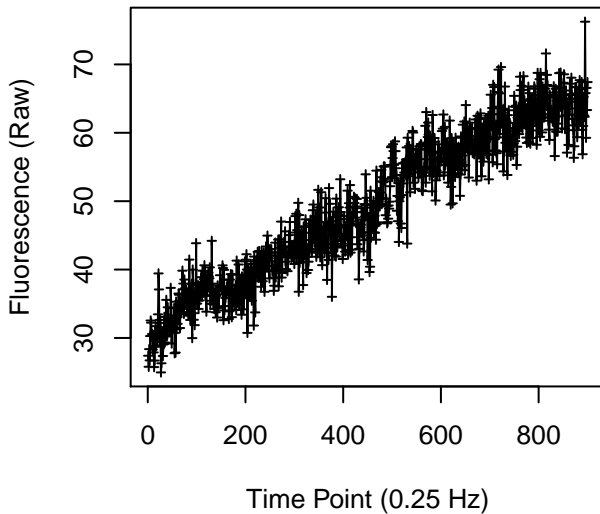

**Cell 999**

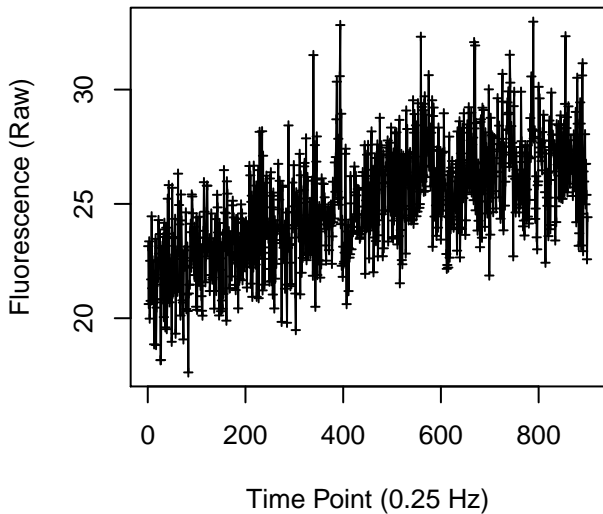

**Cell 1000**

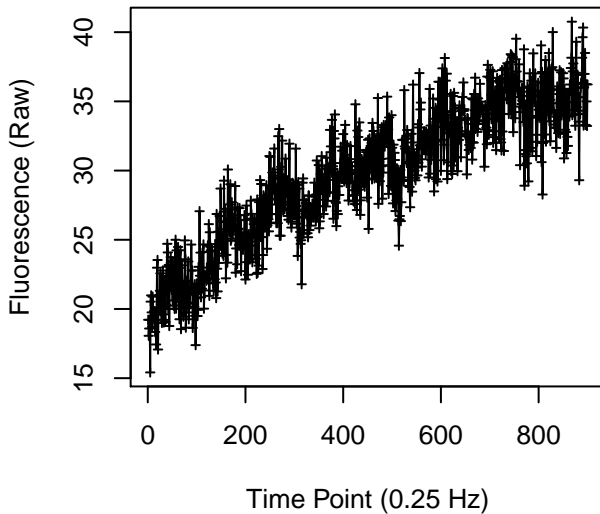



**Cell 1001**

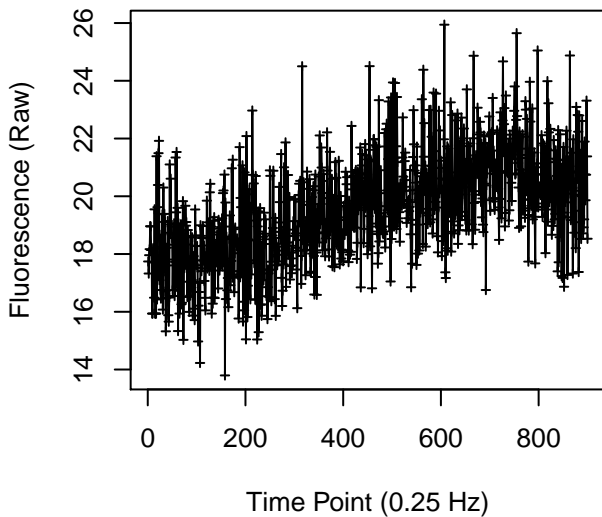

**Cell 1002**

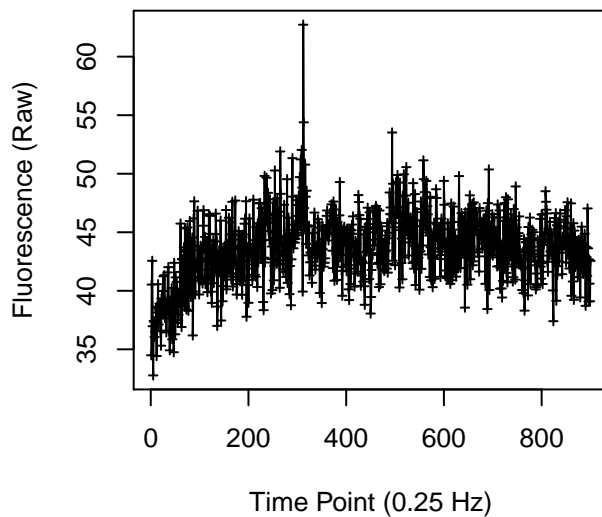

**Cell 1003**

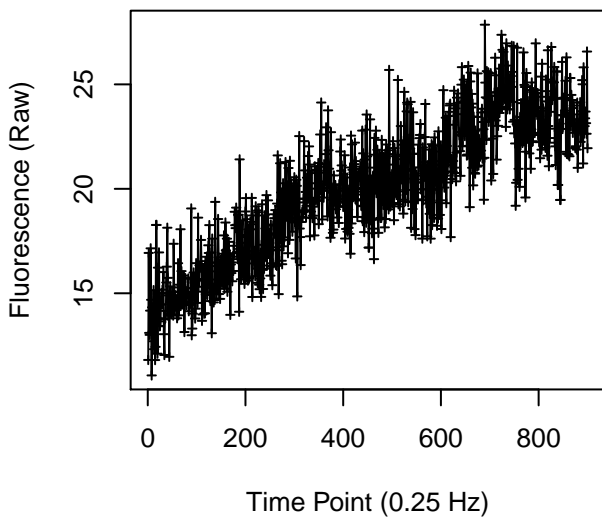

**Cell 1004**

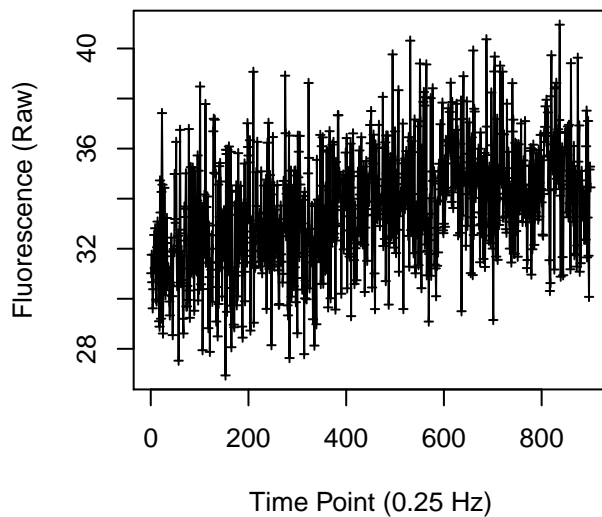

**Cell 1005**

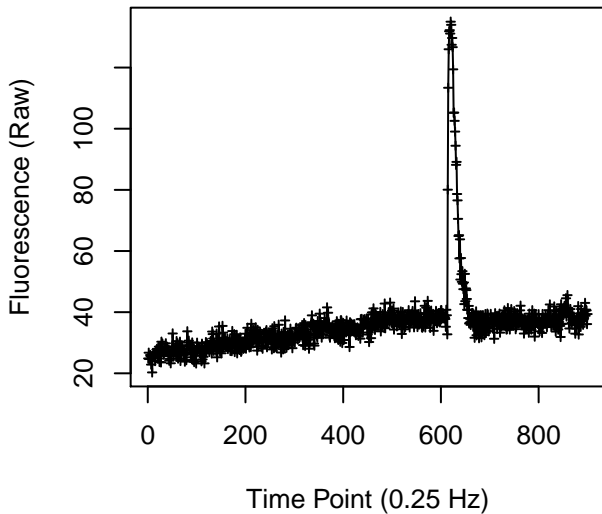

**Cell 1006**

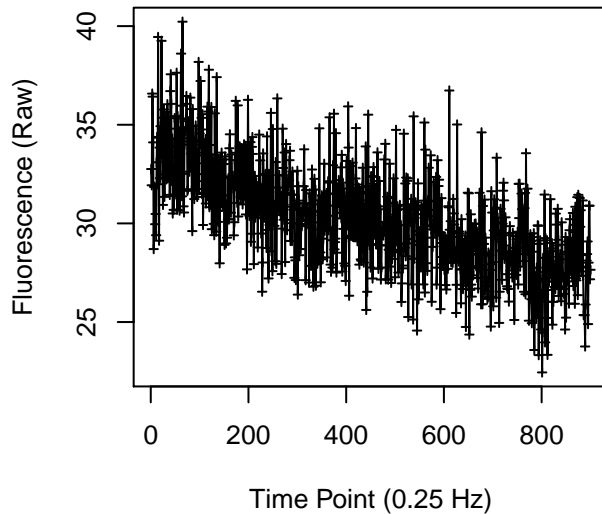

**Cell 1007**

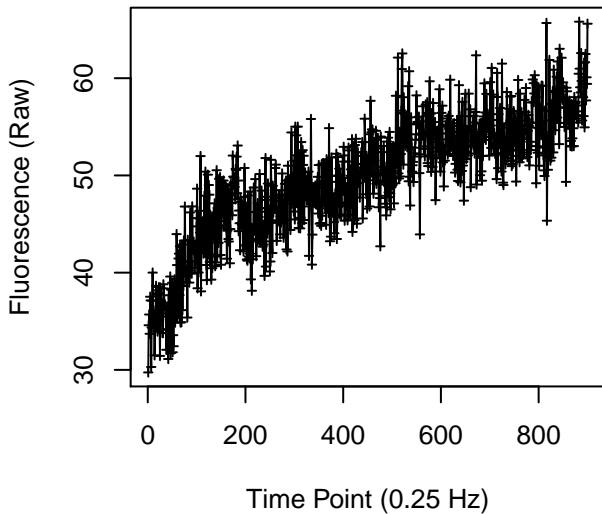

**Cell 1008**

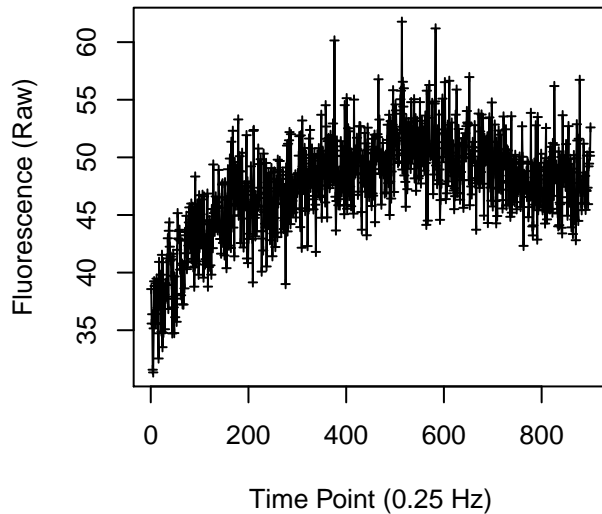

**Cell 1009**

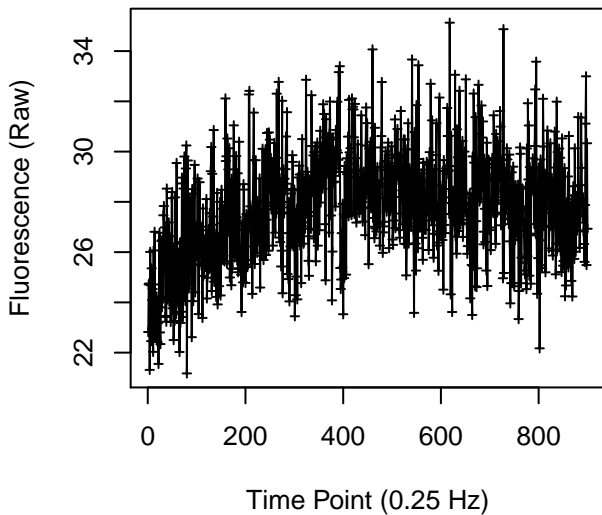

**Cell 1010**

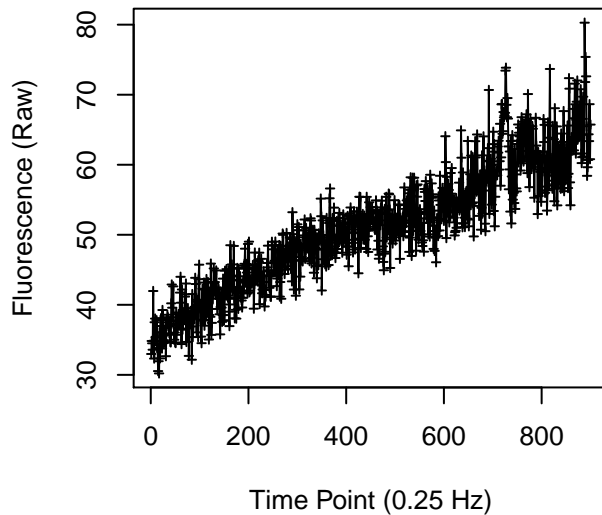

**Cell 1011**

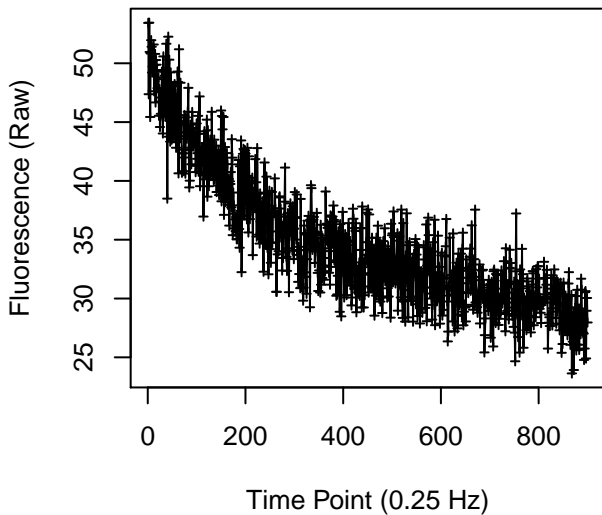

**Cell 1012**

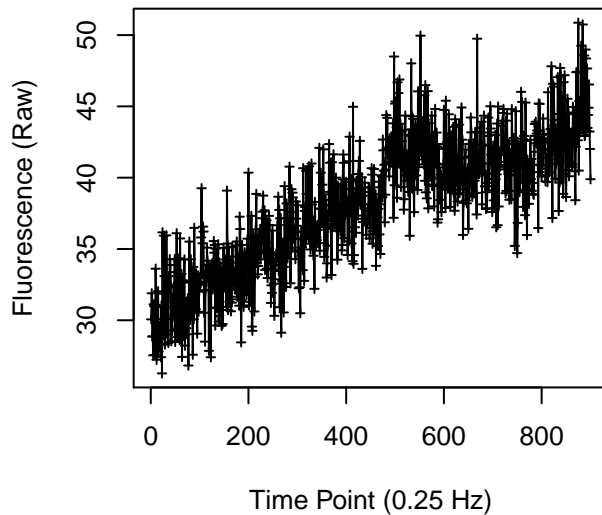

**Cell 1013**

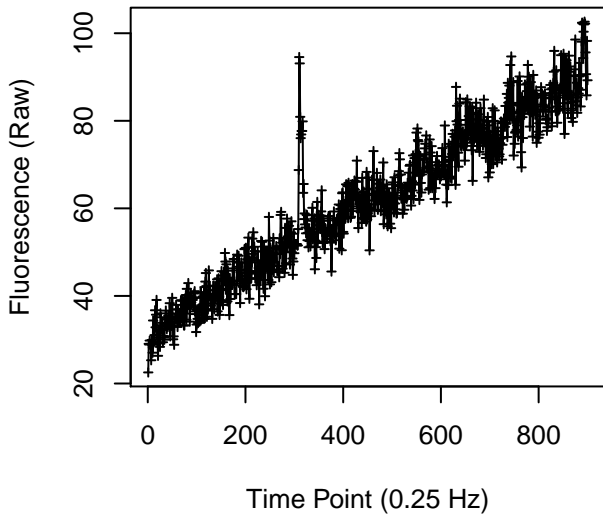

**Cell 1014**

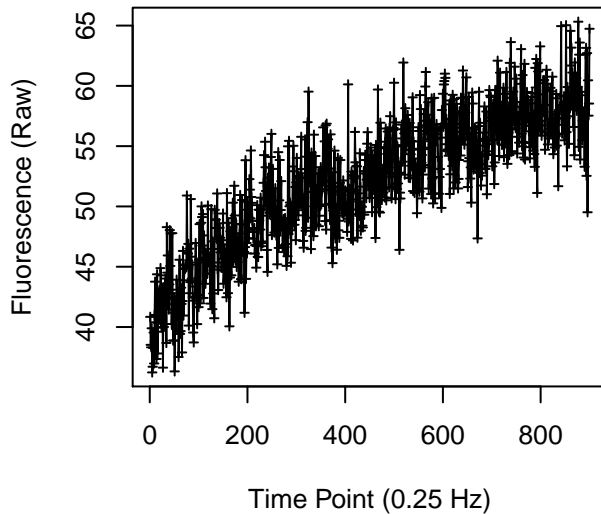

**Cell 1015**

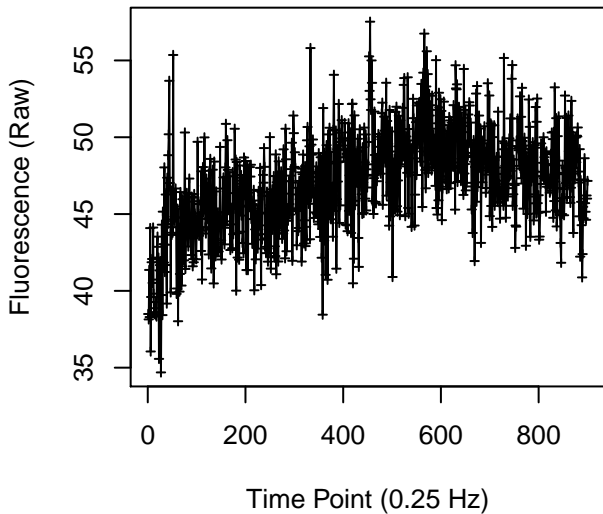

**Cell 1016**

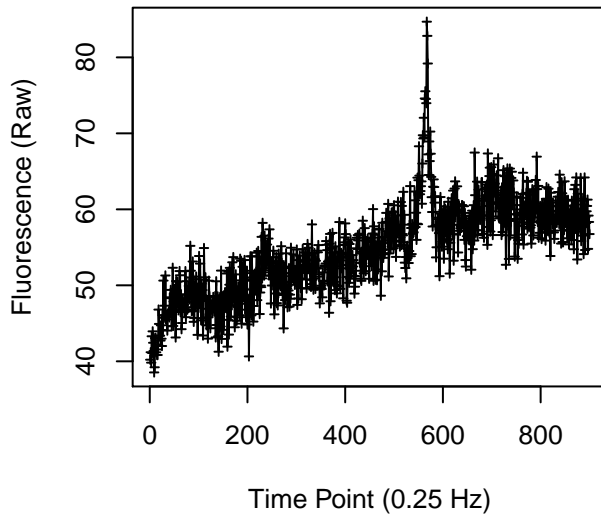

**Cell 1017**

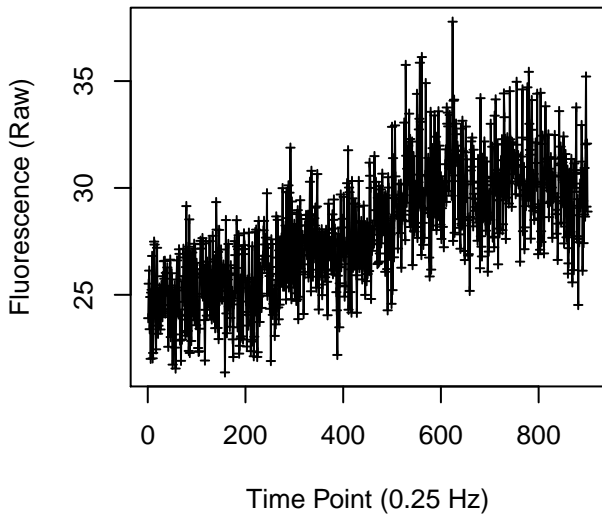

**Cell 1018**

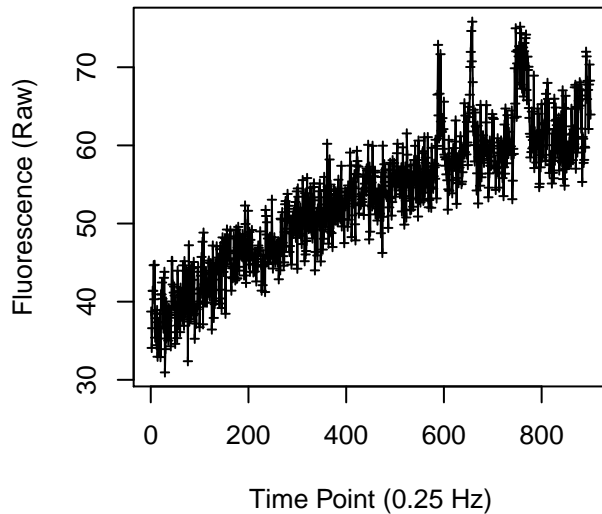

**Cell 1019**

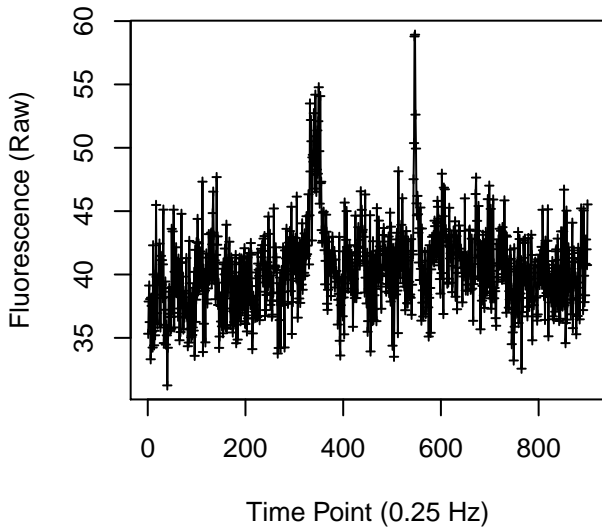

**Cell 1020**

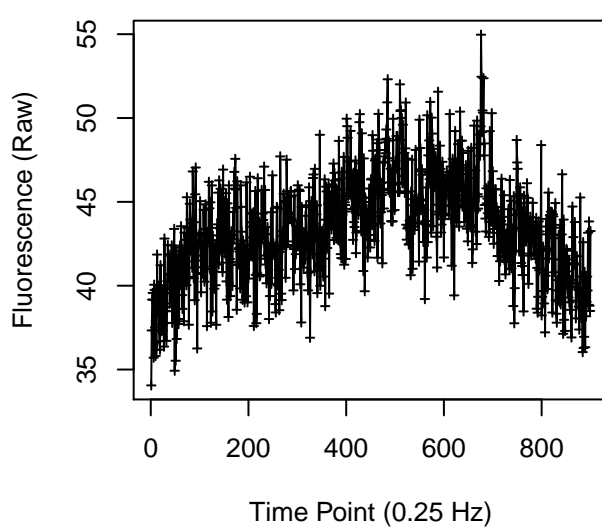

**Cell 1021**

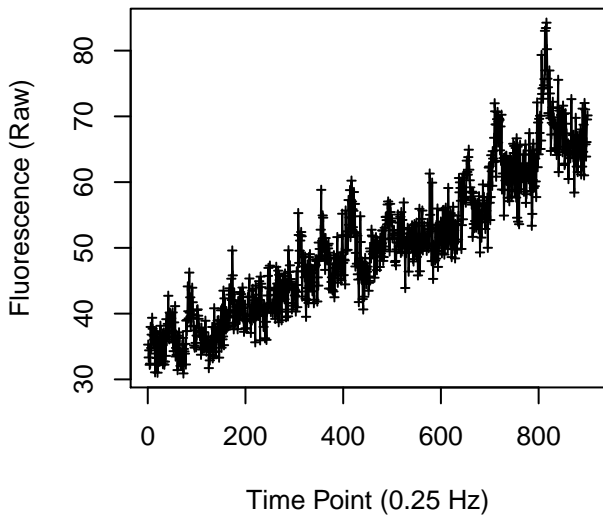

**Cell 1022**

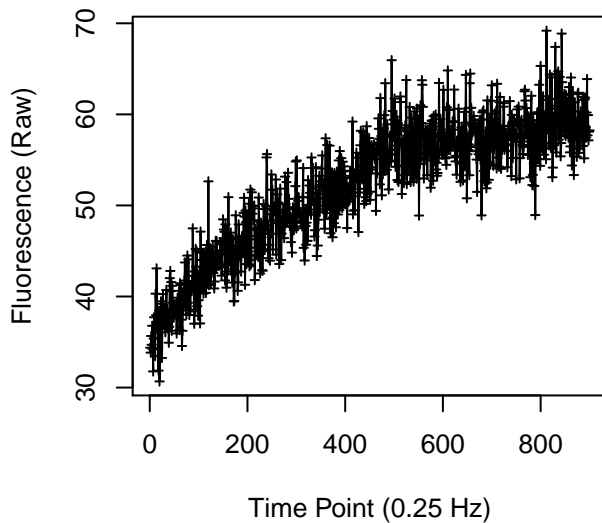

**Cell 1023**

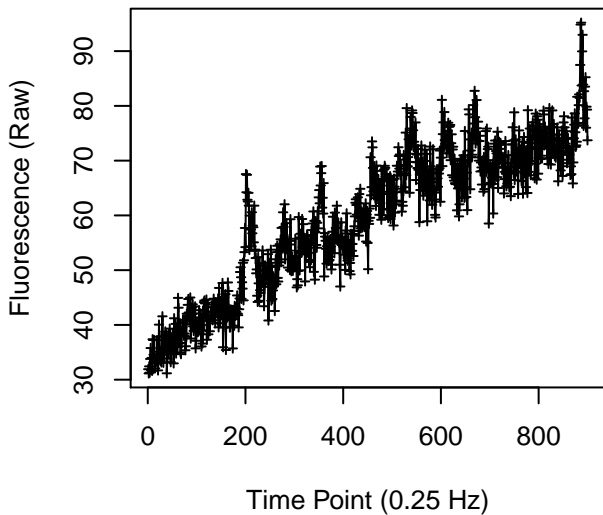

**Cell 1024**

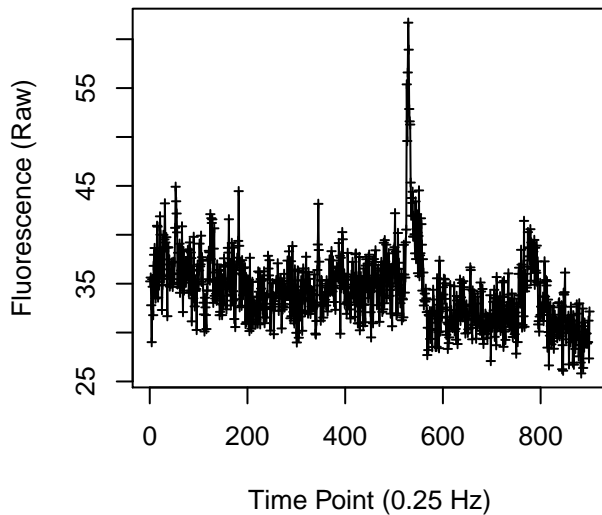

**Cell 1025**

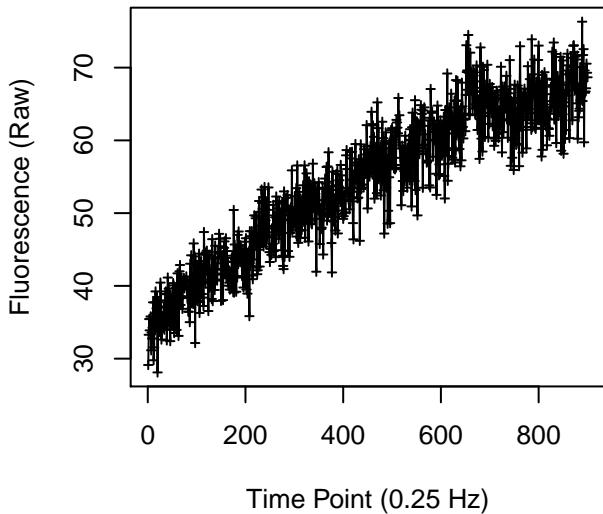

**Cell 1026**

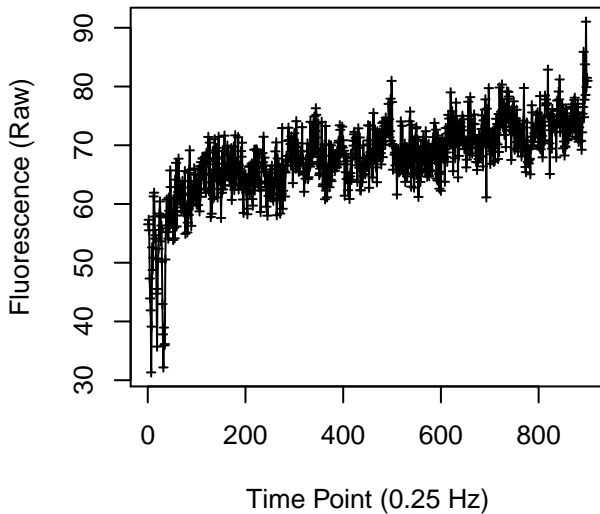

**Cell 1027**

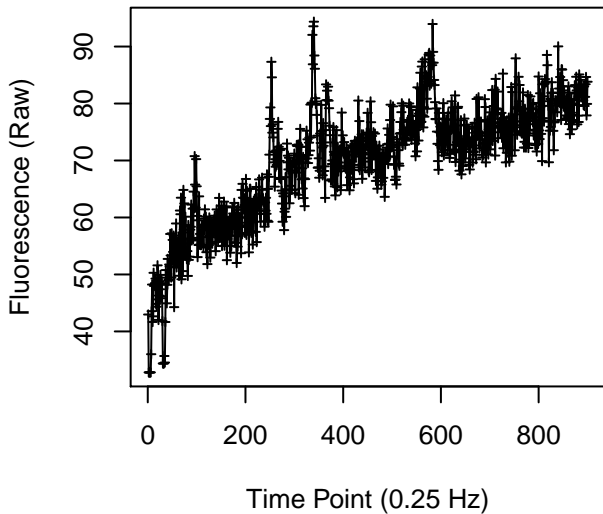

**Cell 1028**

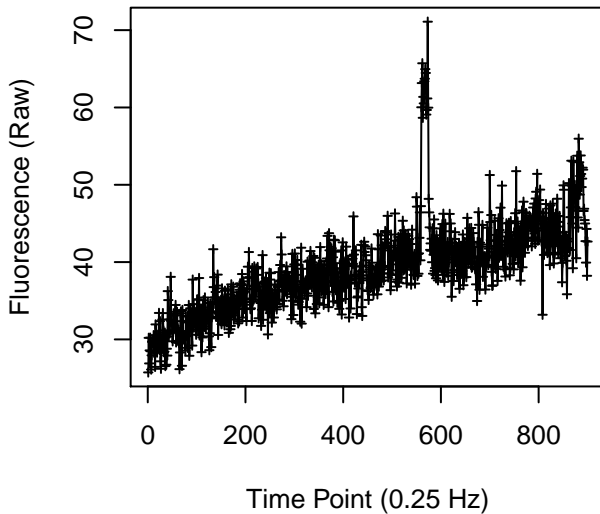

**Cell 1029**

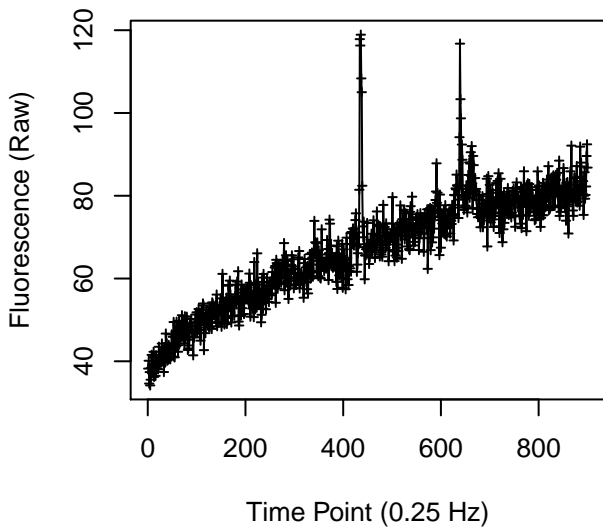

**Cell 1030**

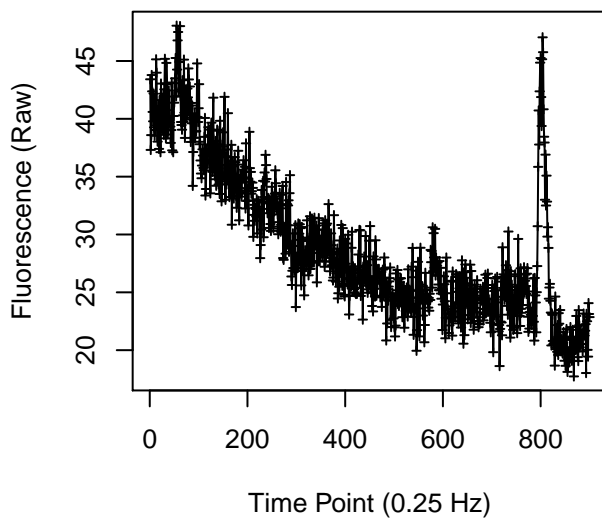

**Cell 1031**

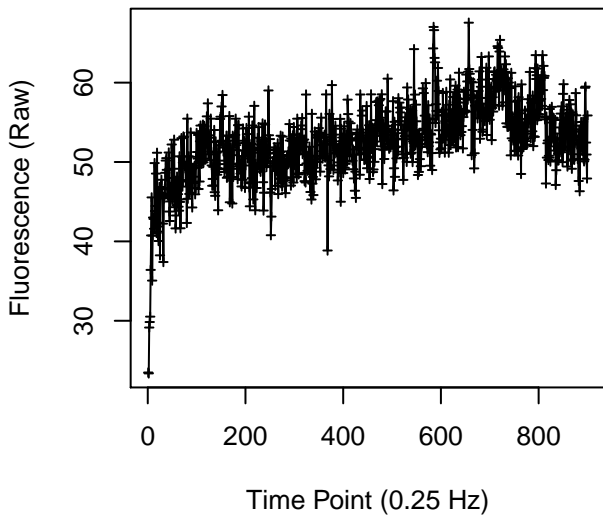

**Cell 1032**

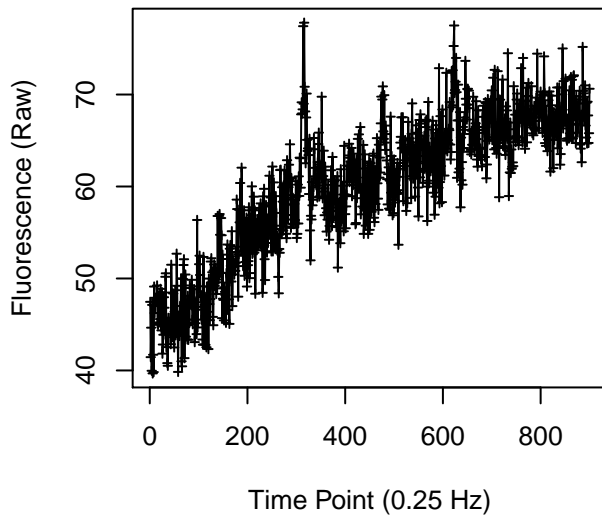



**Cell 1033**

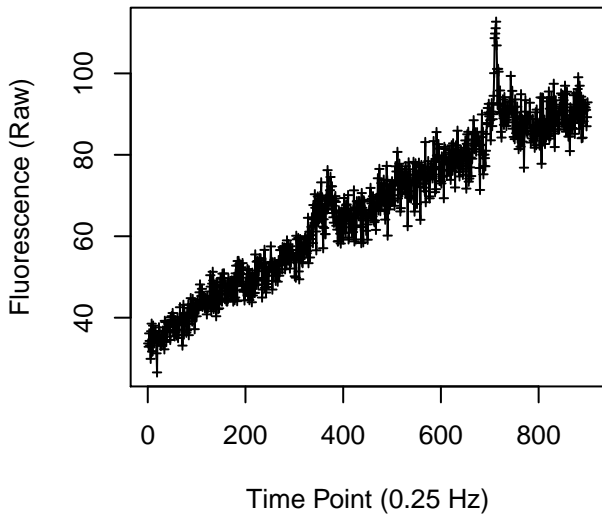

**Cell 1034**

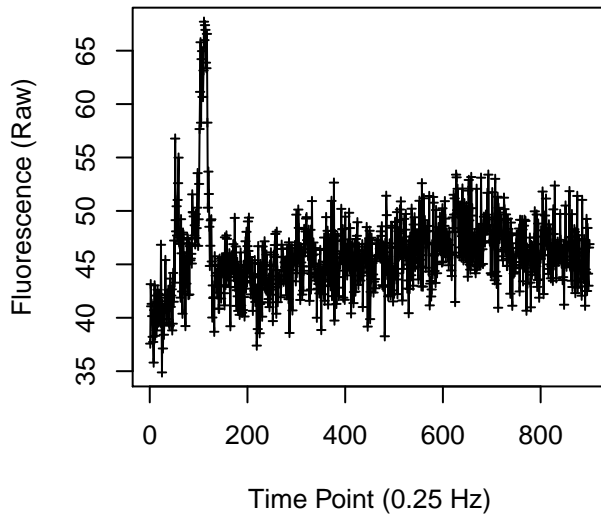

**Cell 1035**

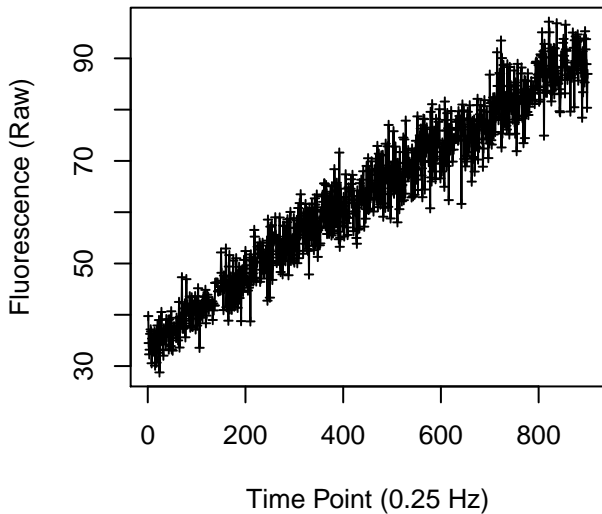

**Cell 1036**

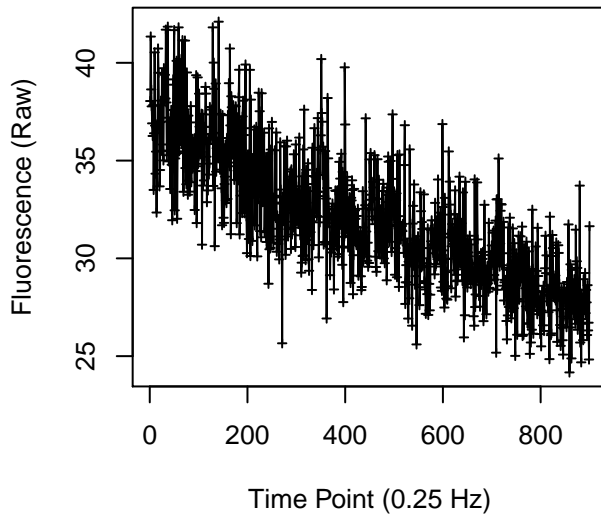

**Cell 1037**

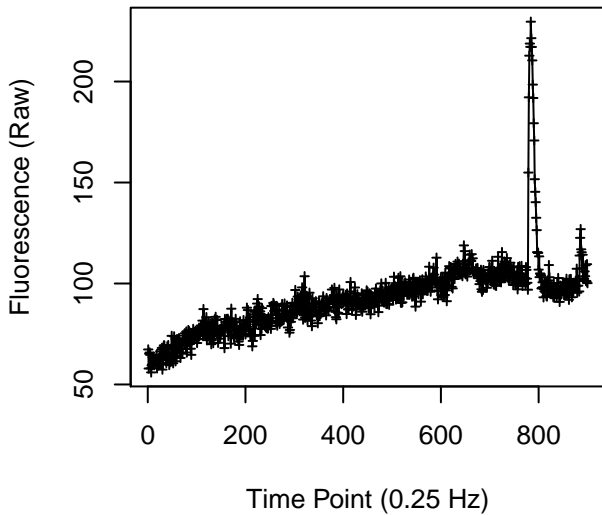

**Cell 1038**

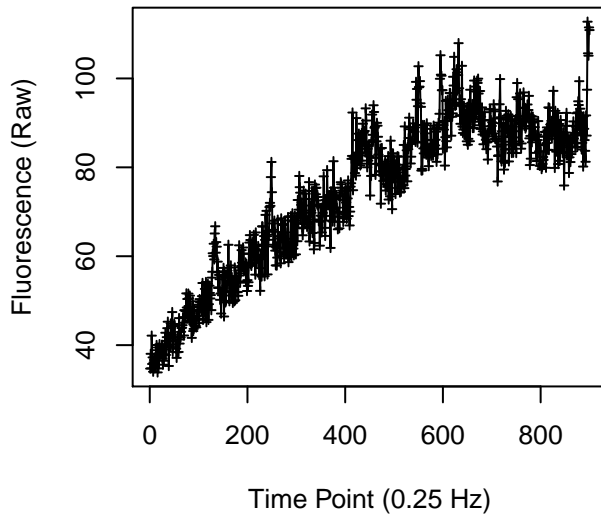

**Cell 1039**

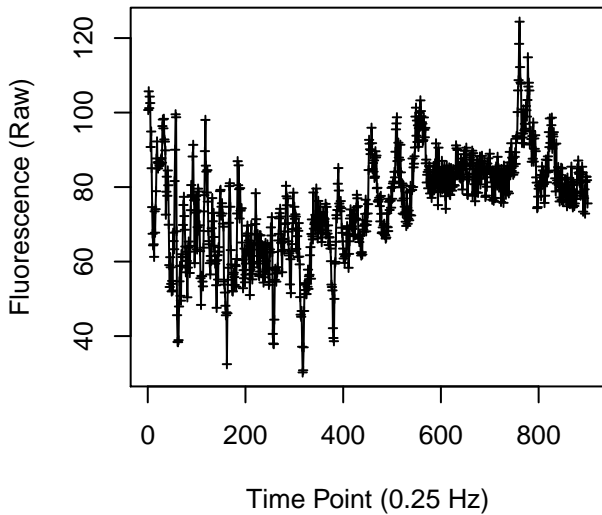

**Cell 1040**

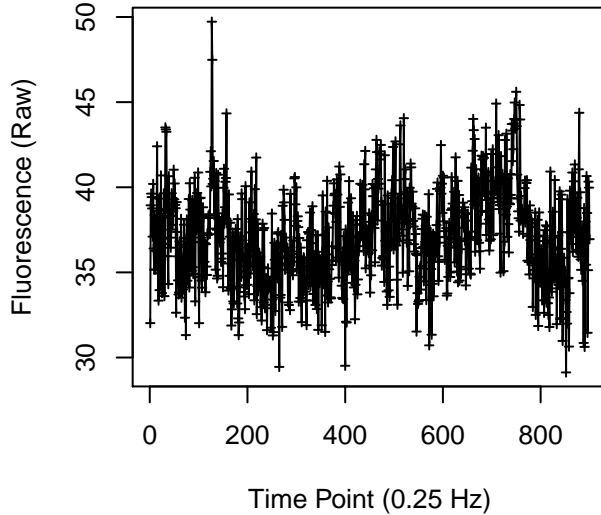

**Cell 1041**

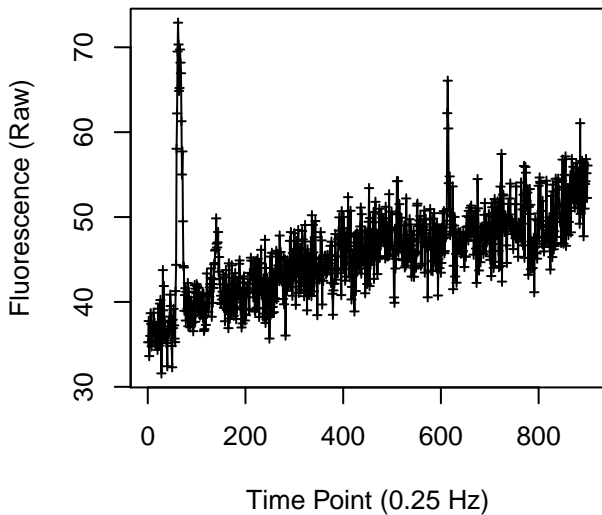

**Cell 1042**

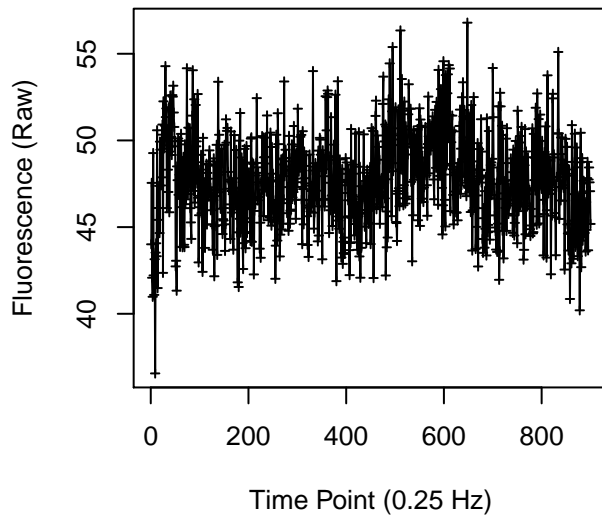

**Cell 1043**

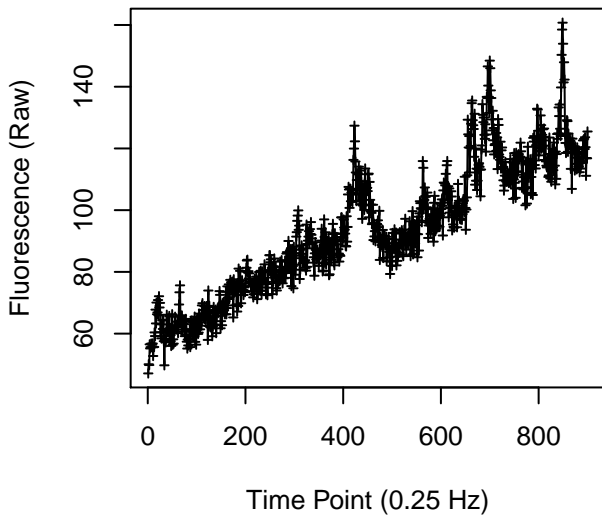

**Cell 1044**

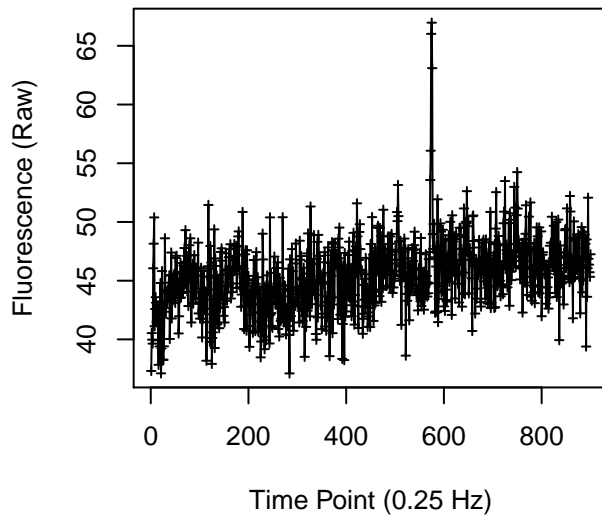

**Cell 1045**

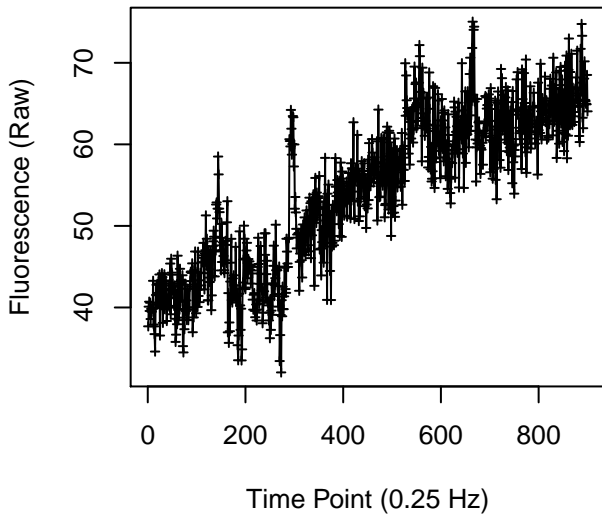

**Cell 1046**

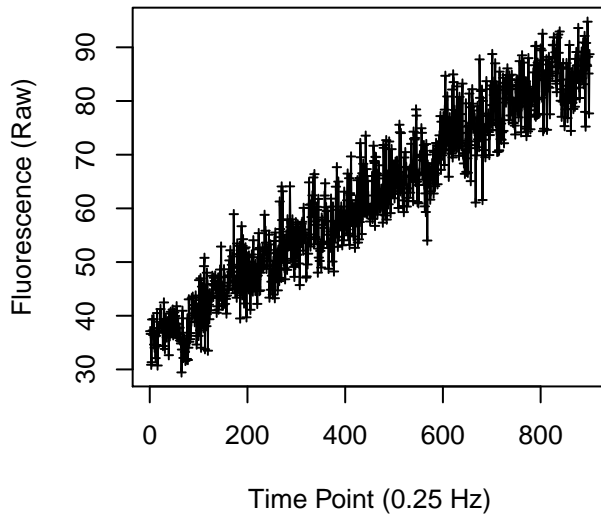

**Cell 1047**

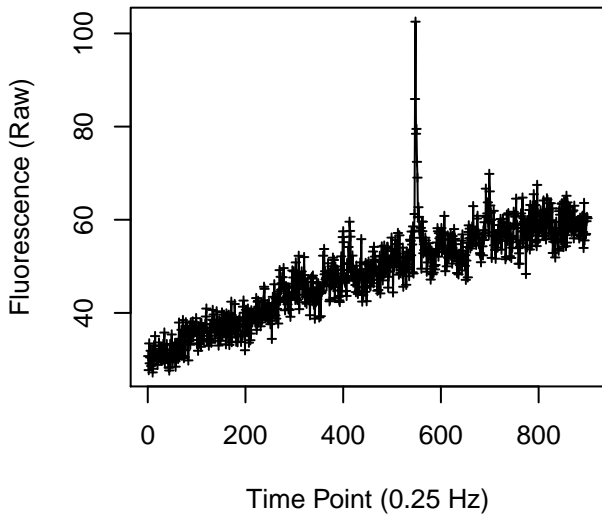

**Cell 1048**

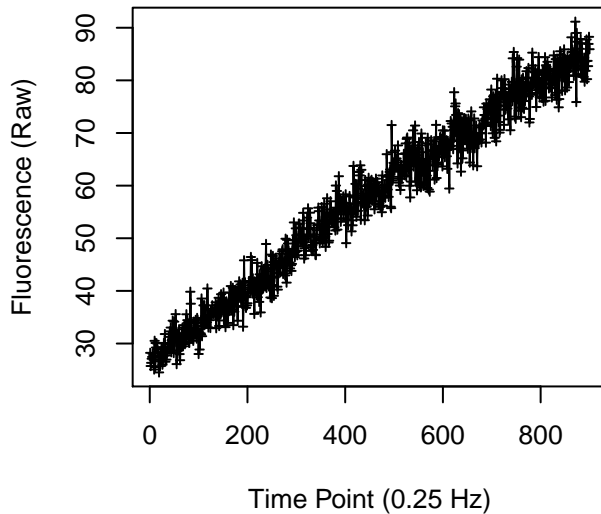

**Cell 1049**

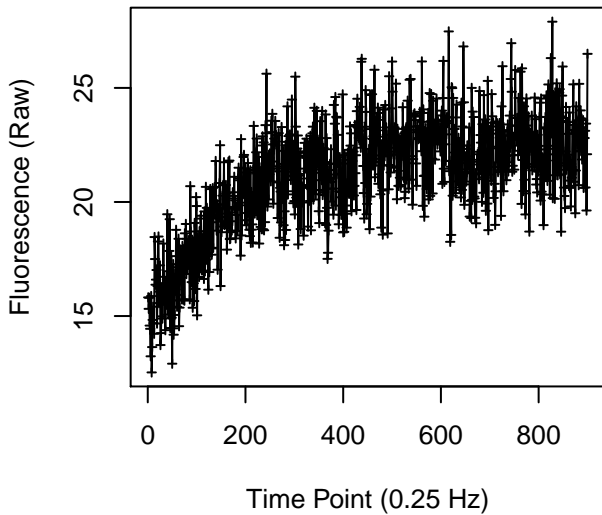

**Cell 1050**

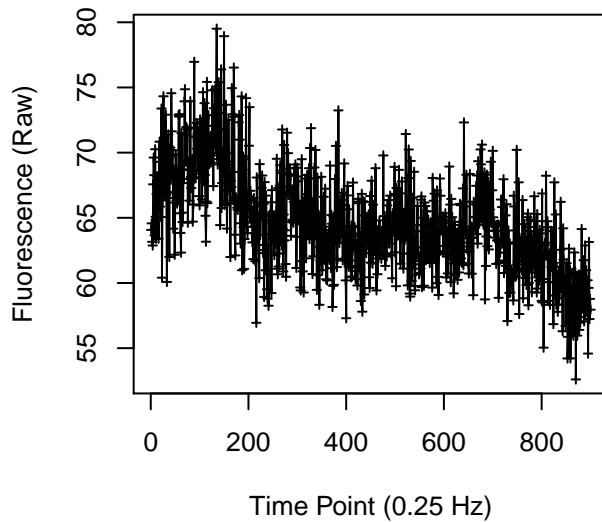

**Cell 1051**

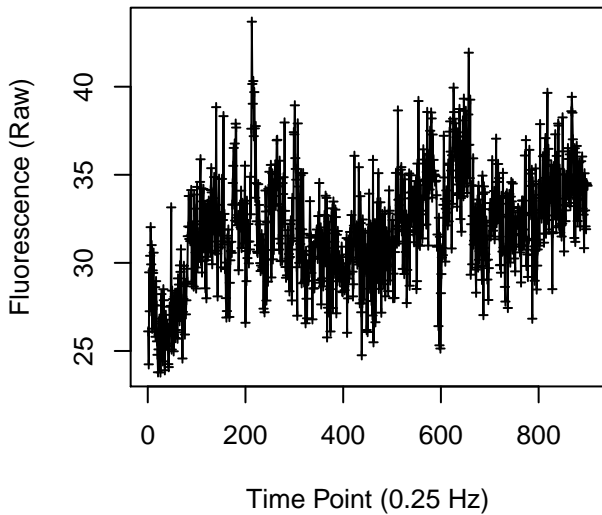

**Cell 1052**

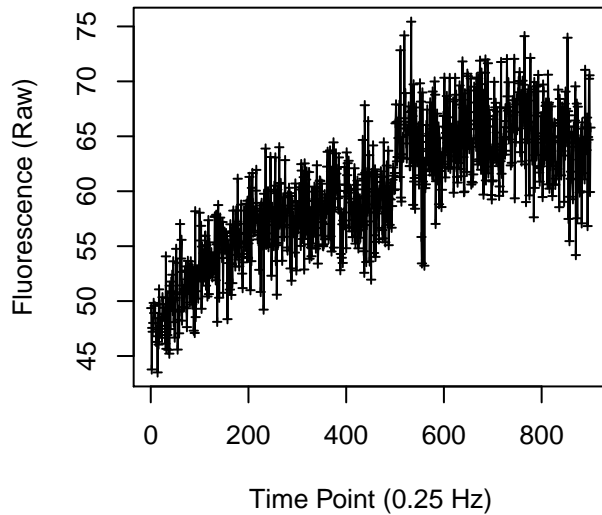

**Cell 1053**

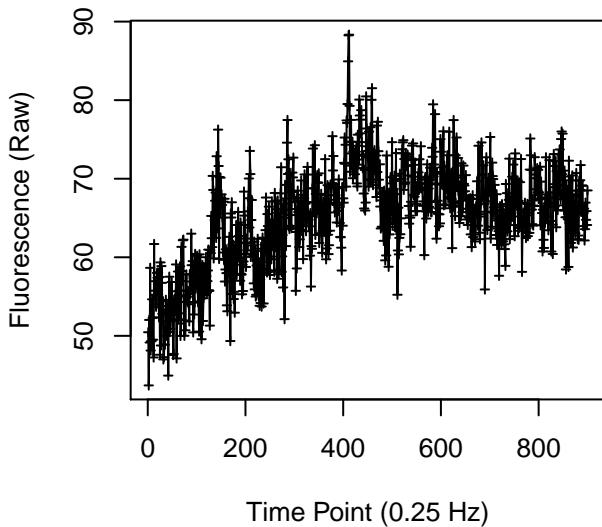

**Cell 1054**

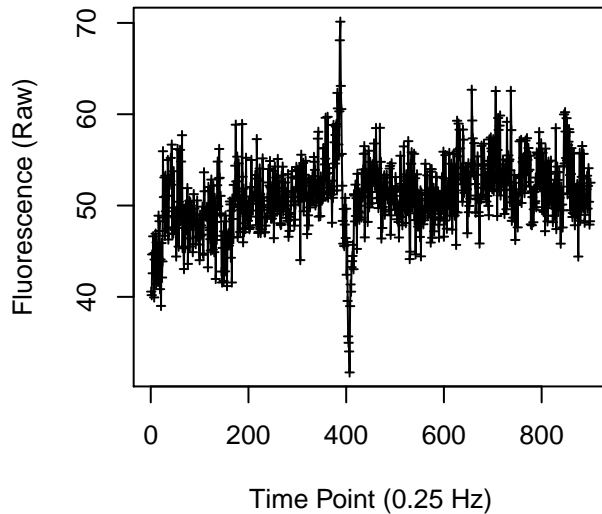

**Cell 1055**

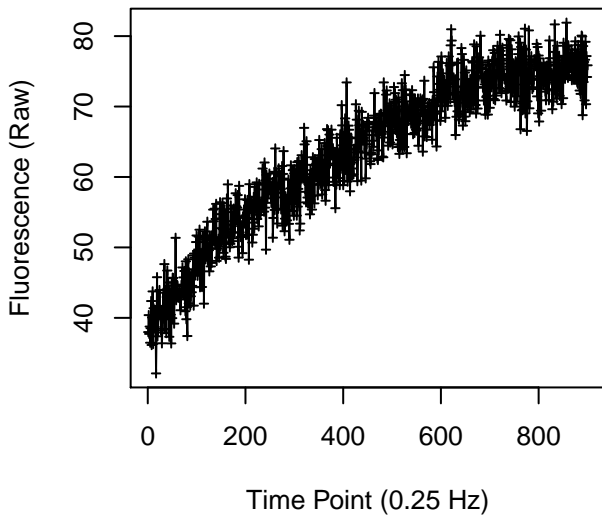

**Cell 1056**

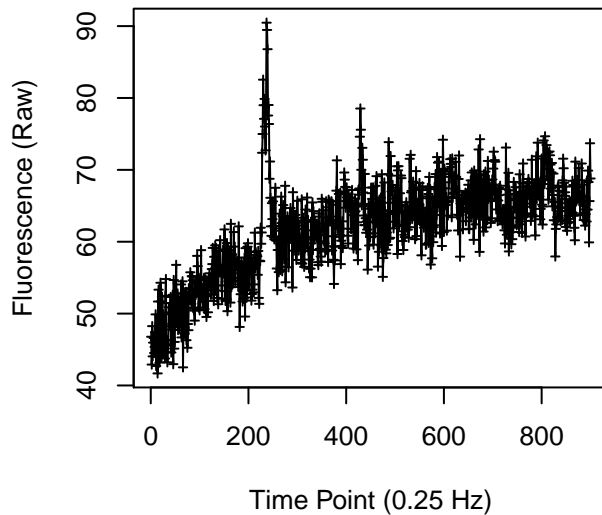

**Cell 1057**

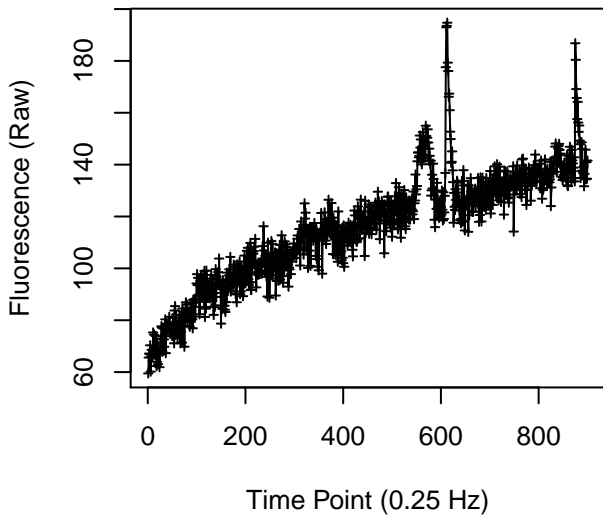

**Cell 1058**

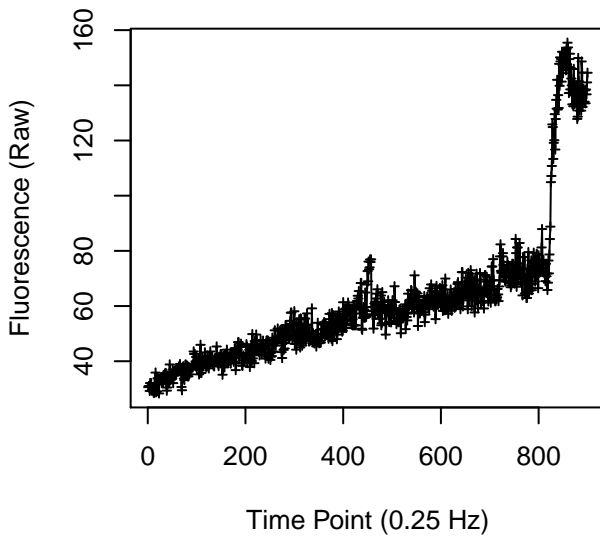

**Cell 1059**

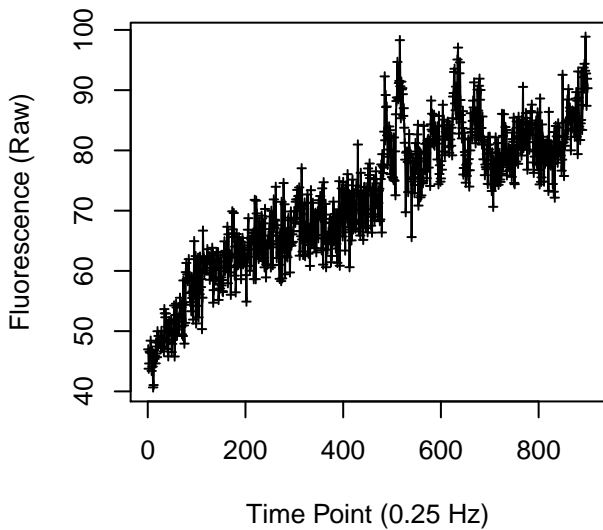

**Cell 1060**

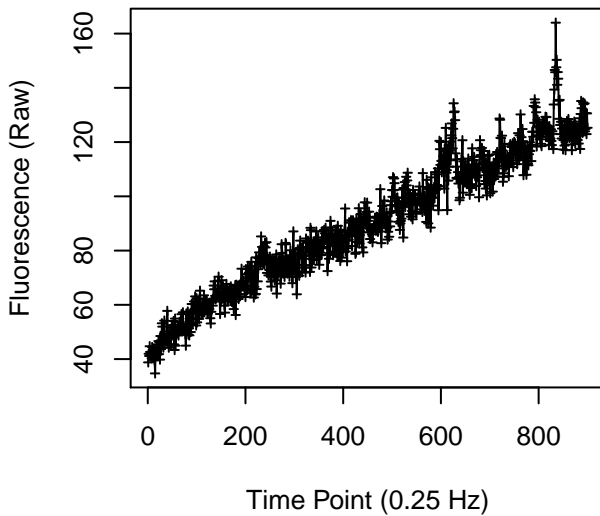

**Cell 1061**

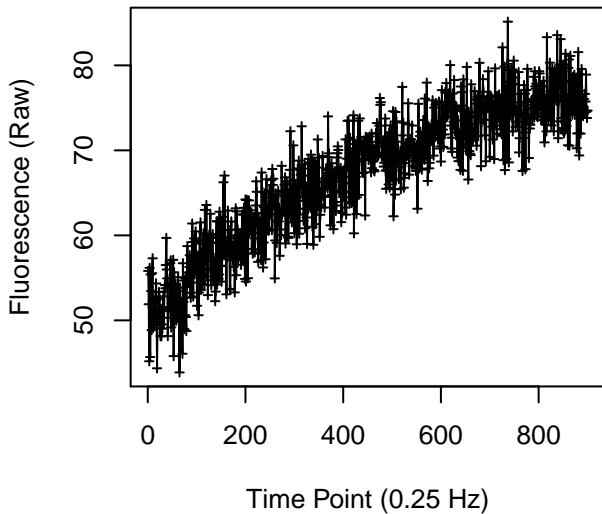

**Cell 1062**

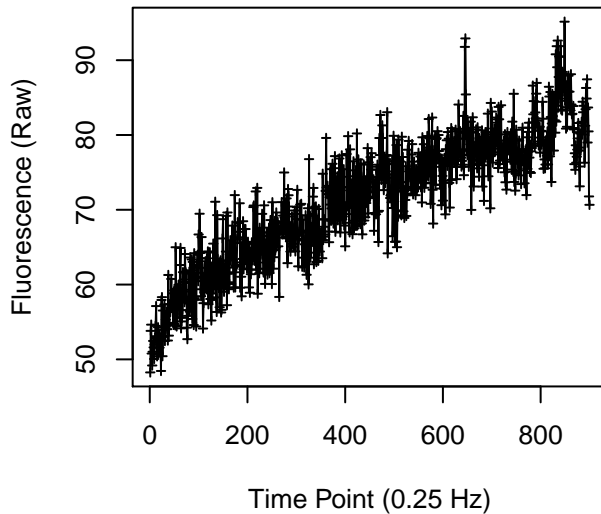

**Cell 1063**

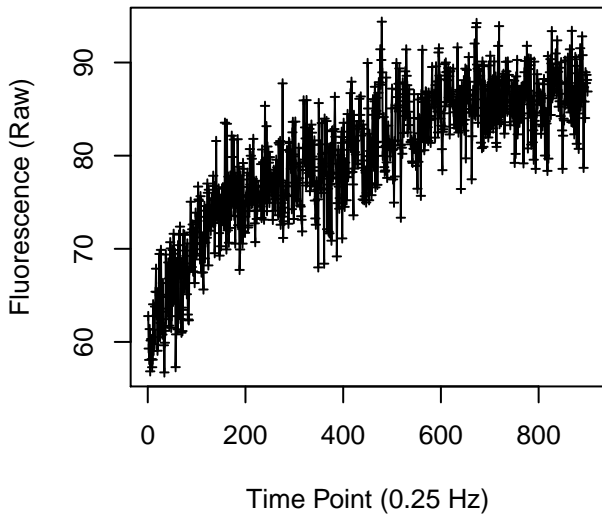

**Cell 1064**

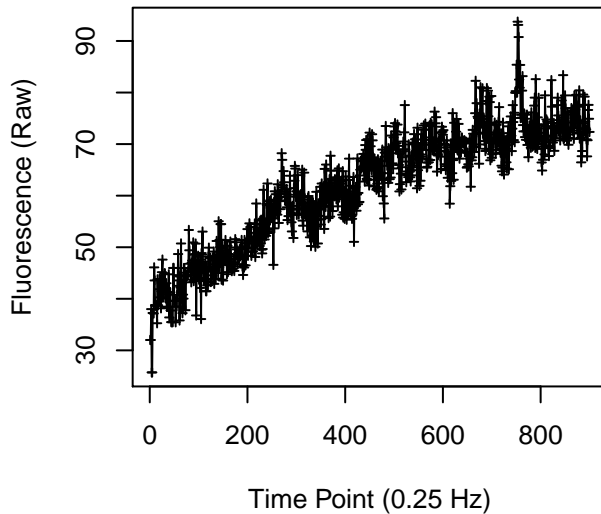



**Cell 1065**

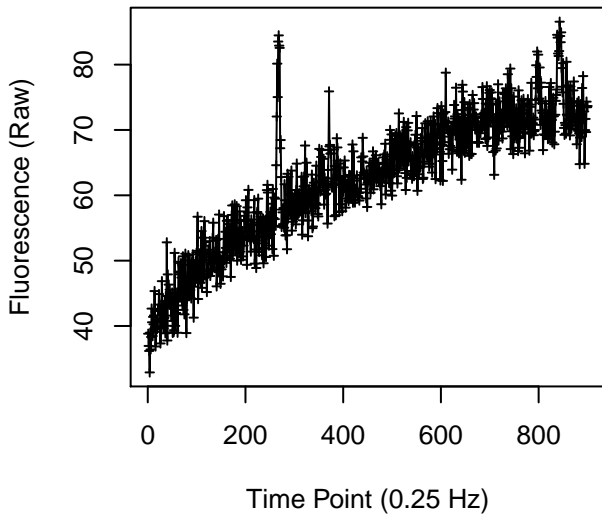

**Cell 1066**

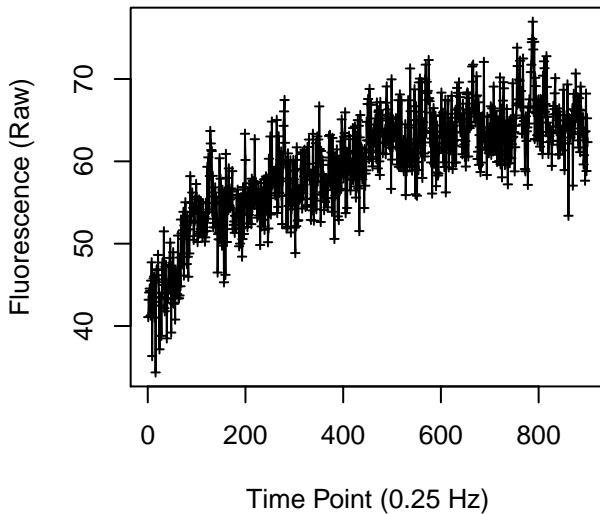

**Cell 1067**

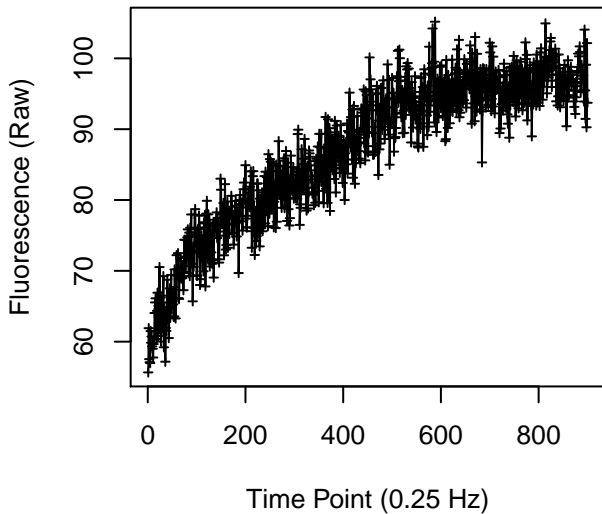

**Cell 1068**

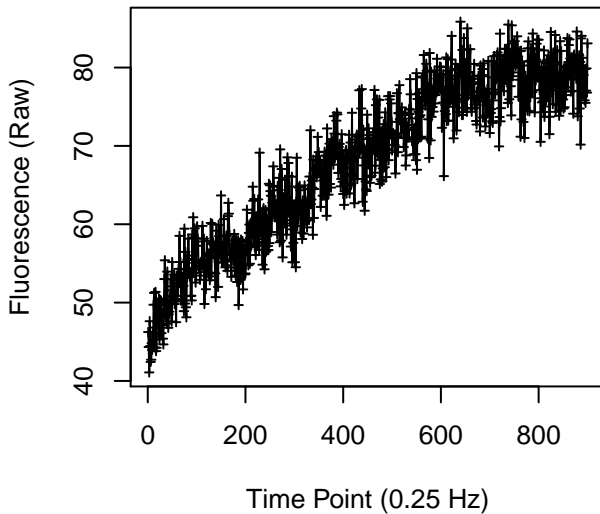

**Cell 1069**

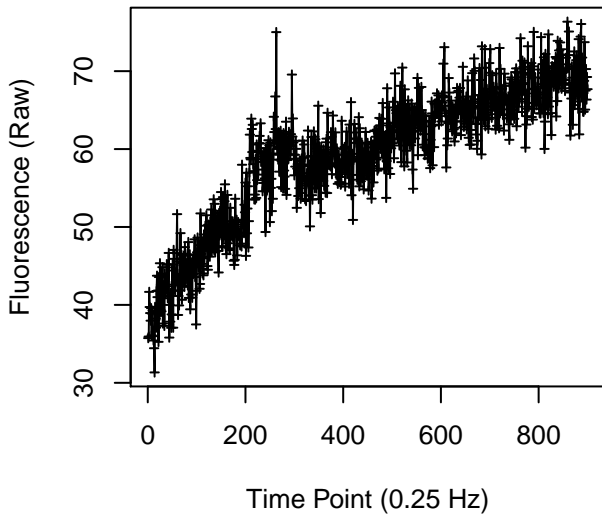

**Cell 1070**

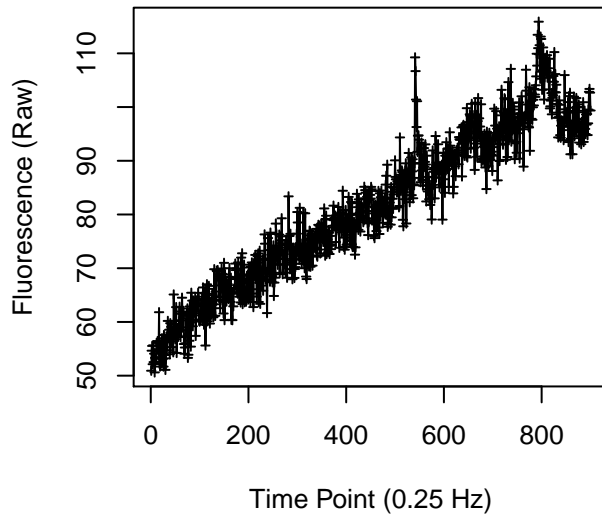

**Cell 1071**

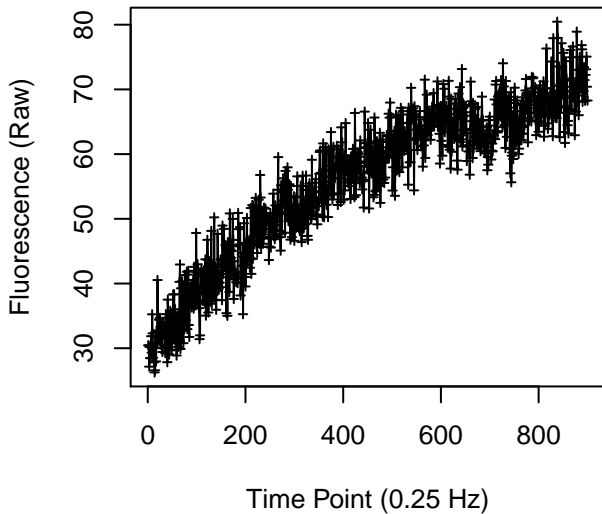

**Cell 1072**

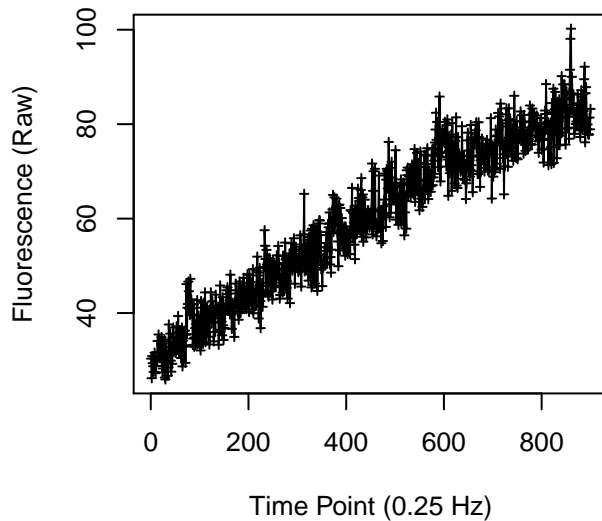

**Cell 1073**

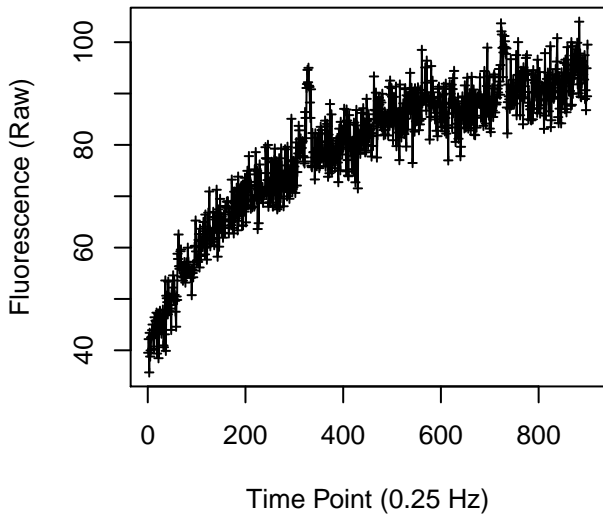

**Cell 1074**

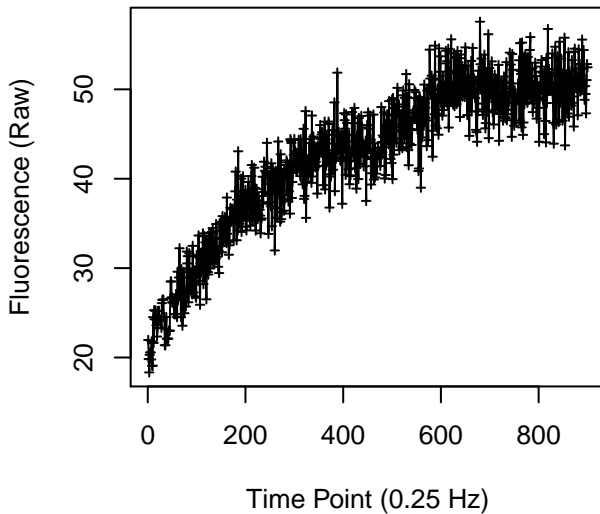

**Cell 1075**

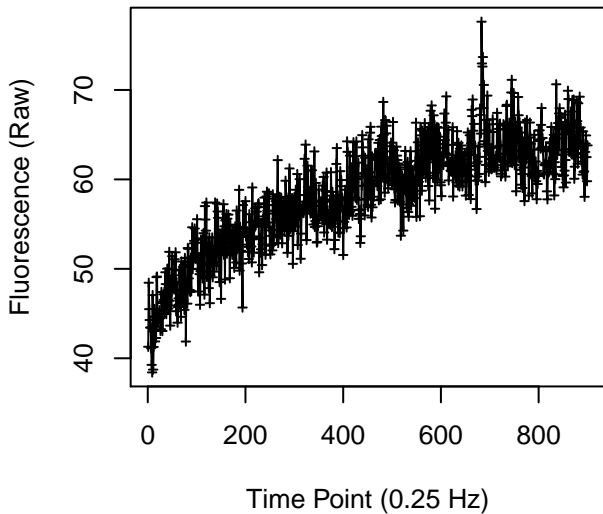

**Cell 1076**

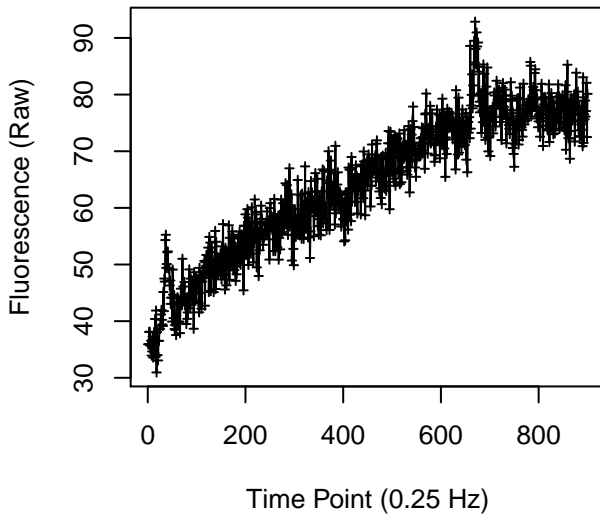

**Cell 1077**

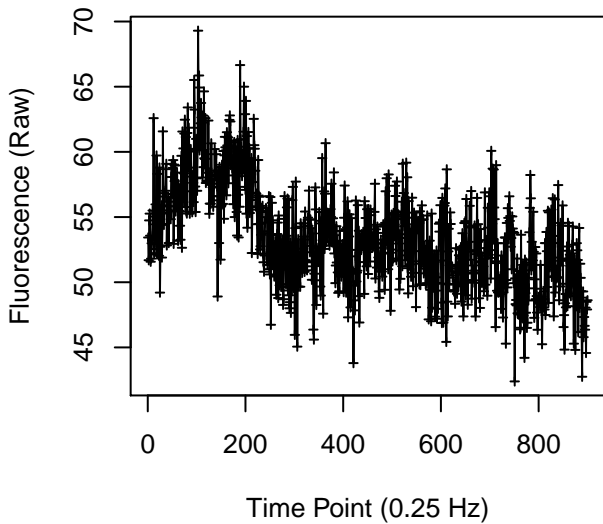

**Cell 1078**

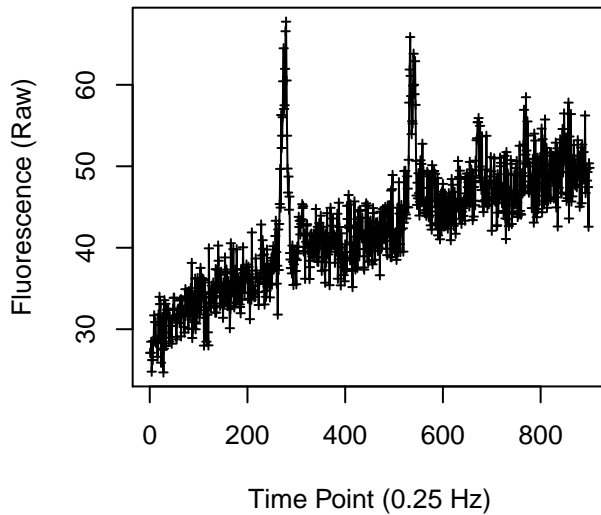

**Cell 1079**

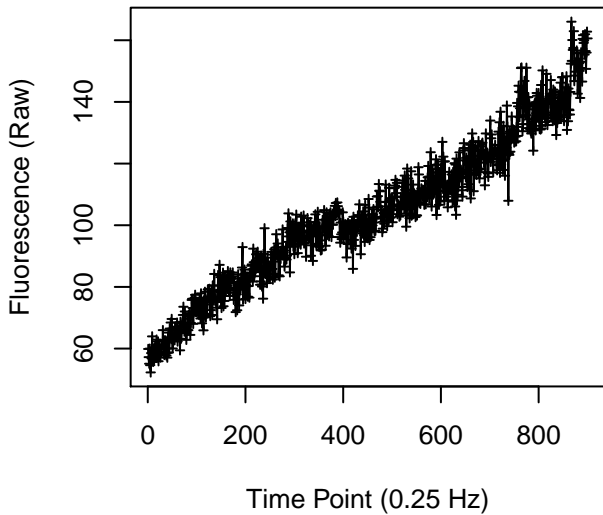

**Cell 1080**

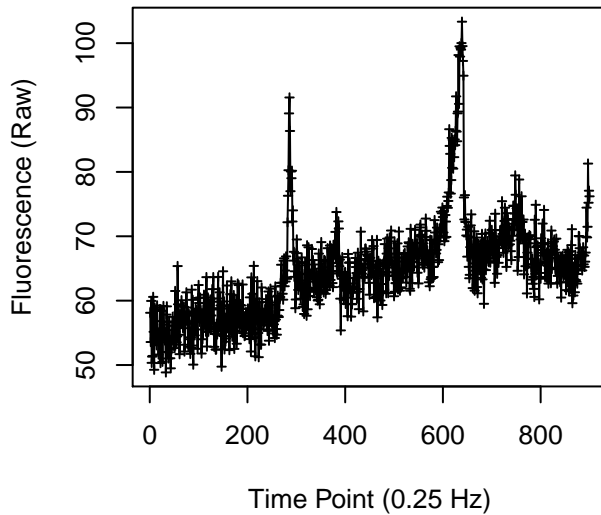

**Cell 1081**

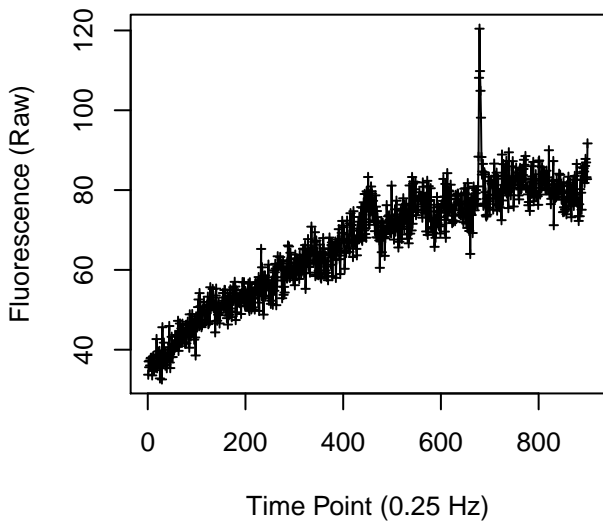

**Cell 1082**

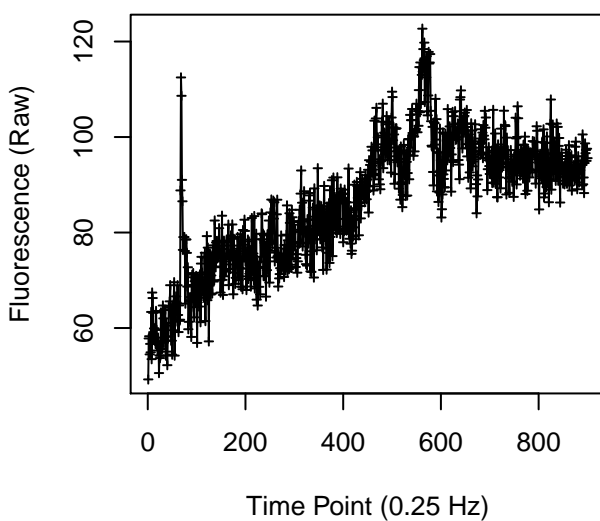

**Cell 1083**

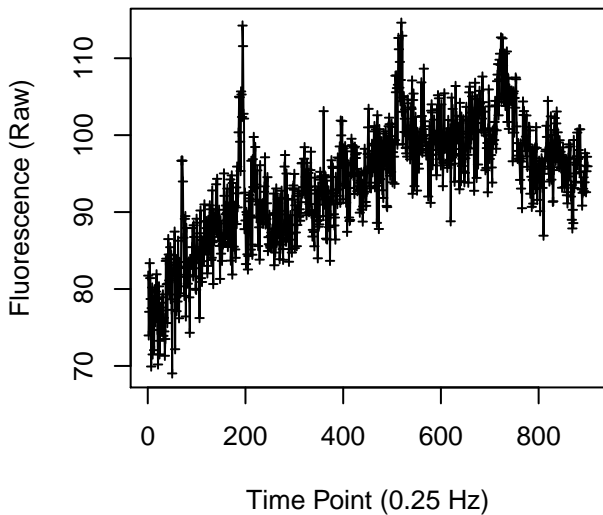

**Cell 1084**

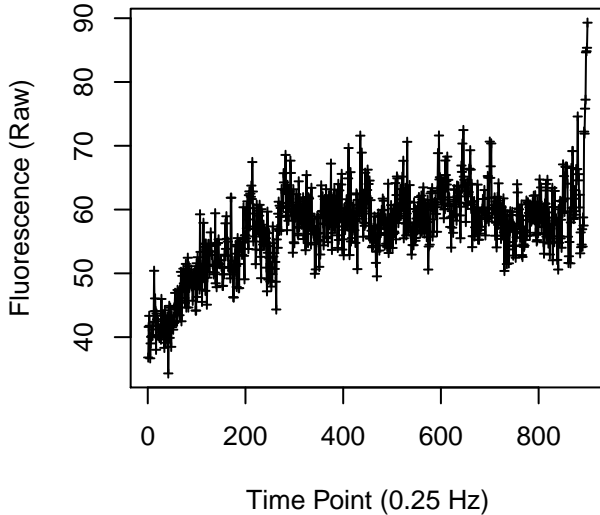

**Cell 1085**

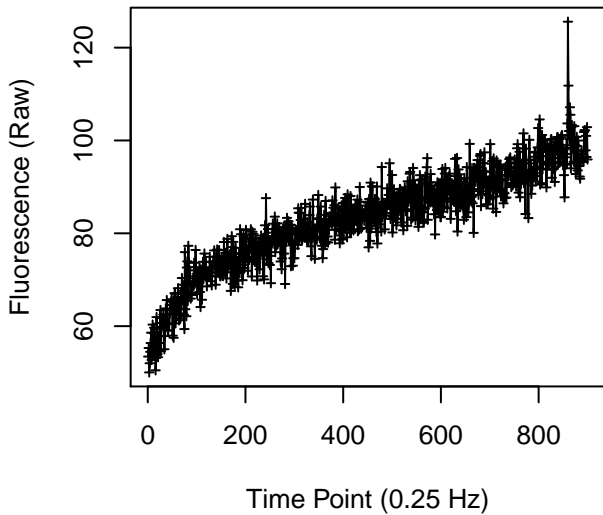

**Cell 1086**

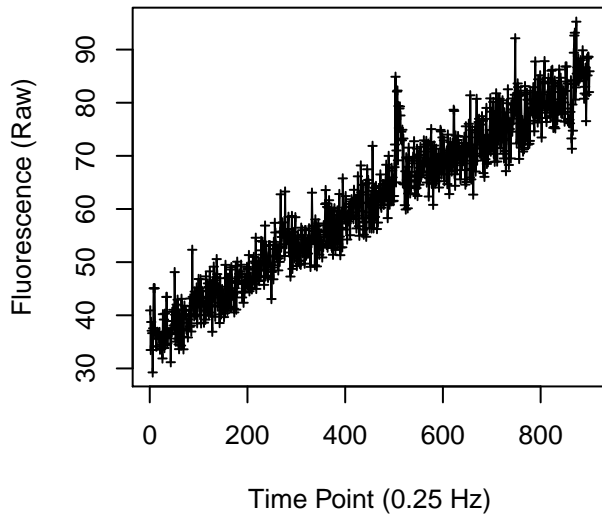

**Cell 1087**

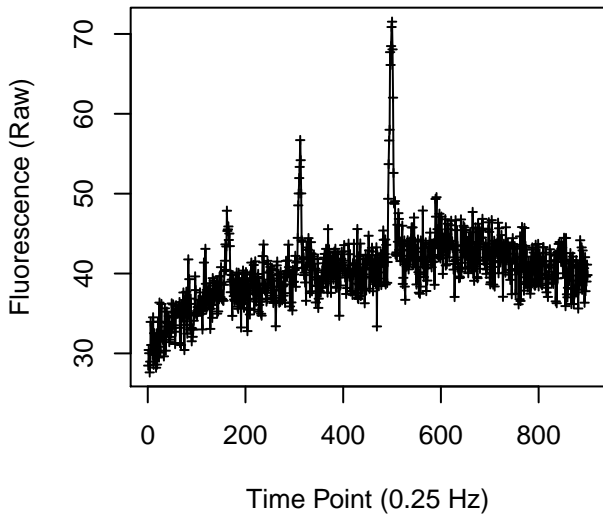

**Cell 1088**

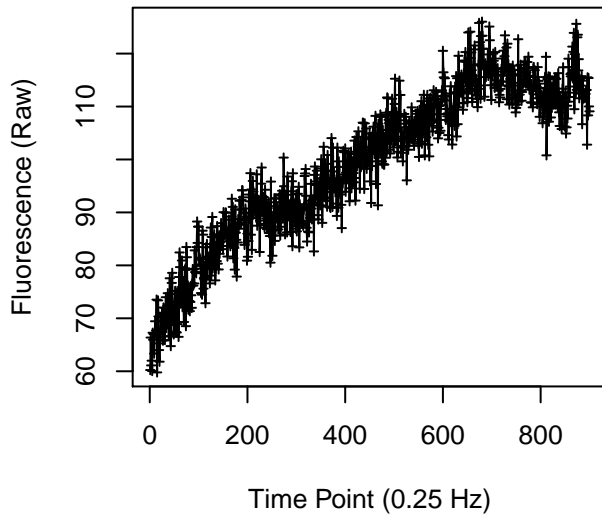

**Cell 1089**

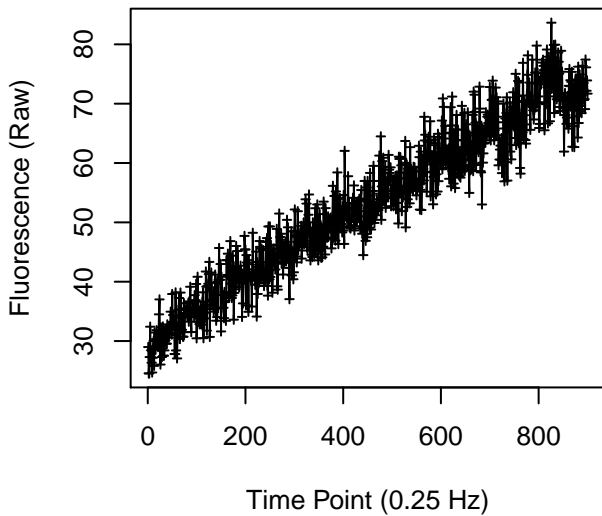

**Cell 1090**

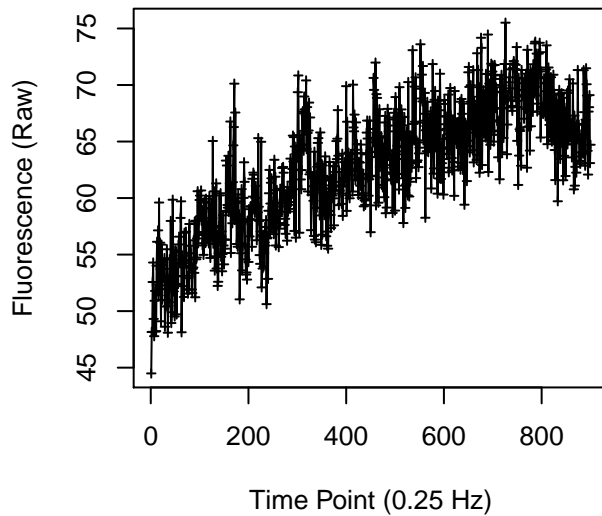

**Cell 1091**

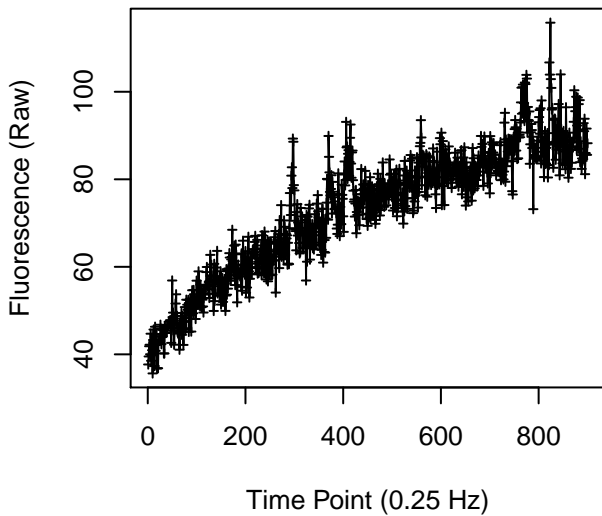

**Cell 1092**

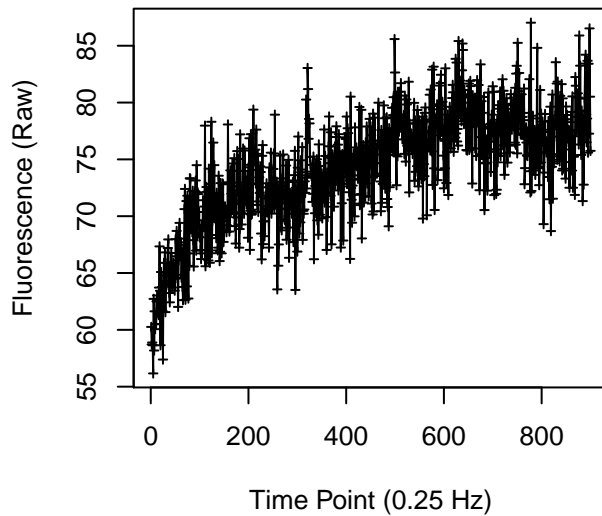

**Cell 1093**

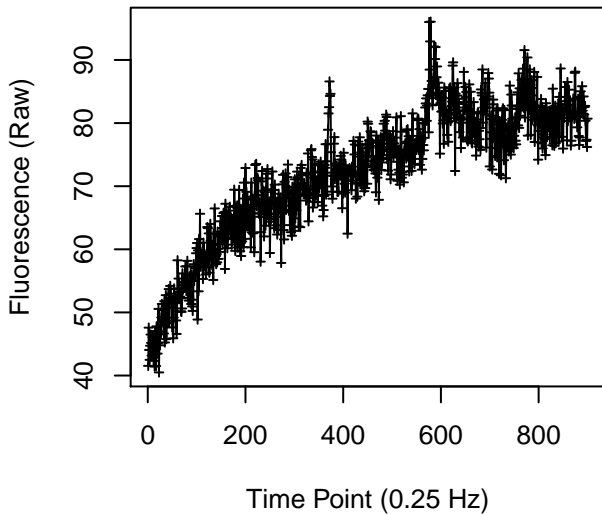

**Cell 1094**

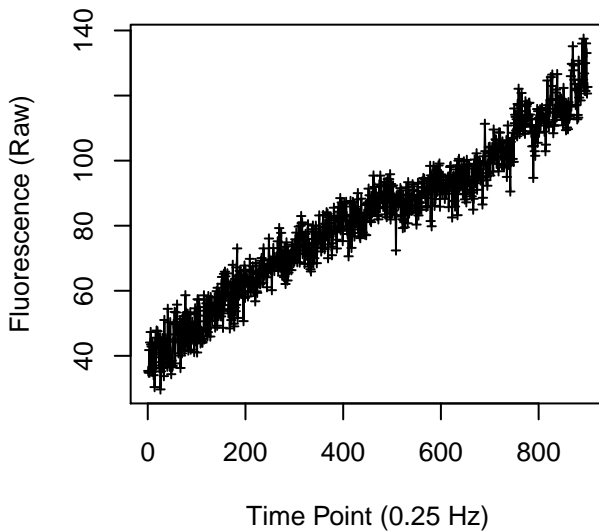

**Cell 1095**

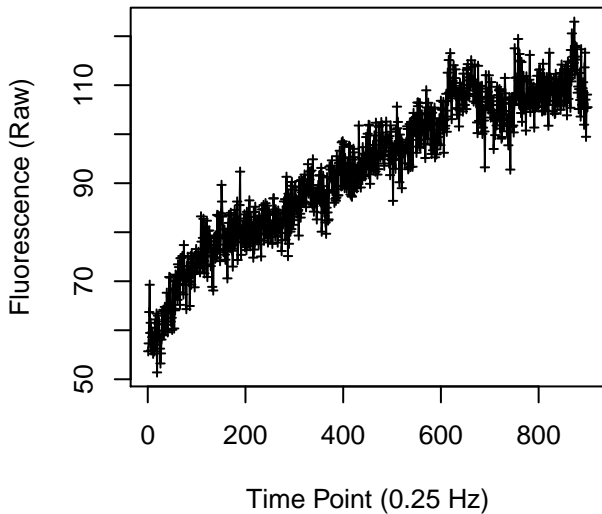

**Cell 1096**

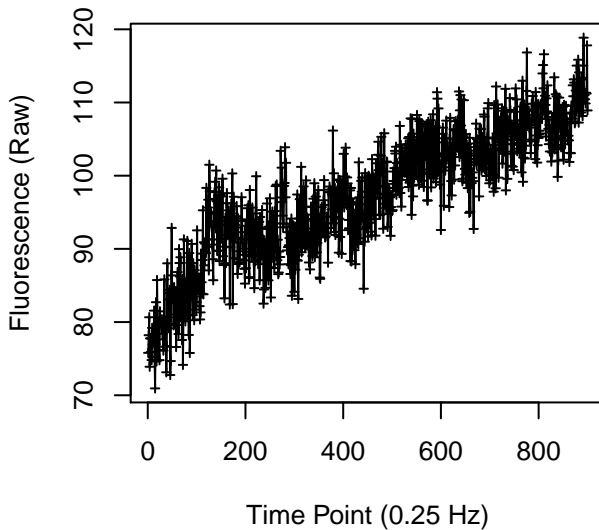



**Cell 1097**

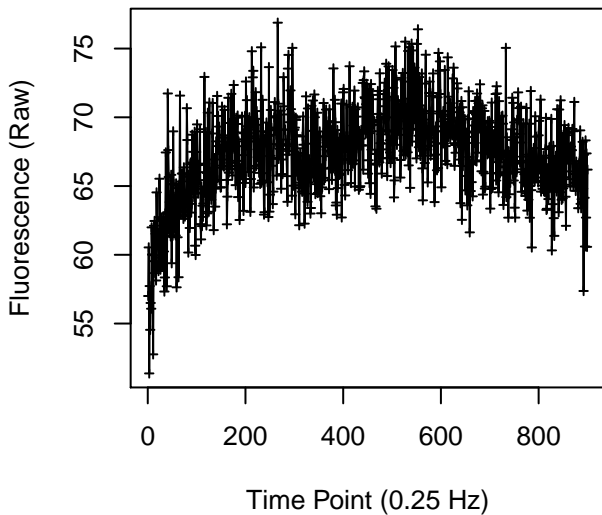

**Cell 1098**

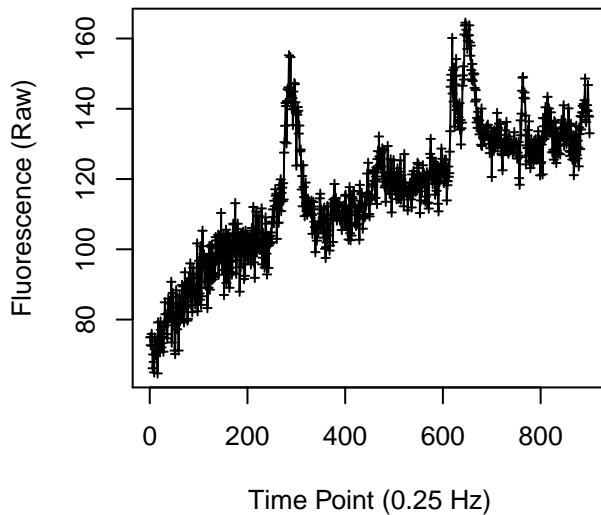

**Cell 1099**

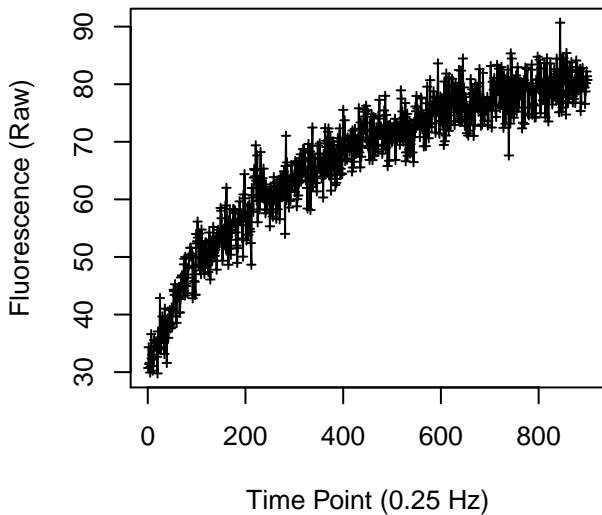

**Cell 1100**

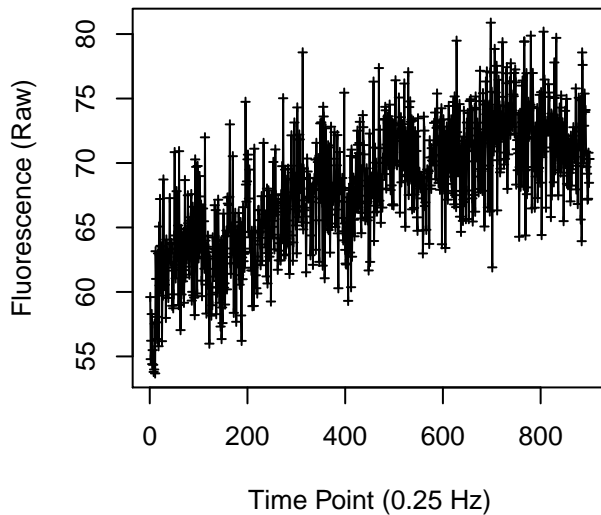

**Cell 1101**

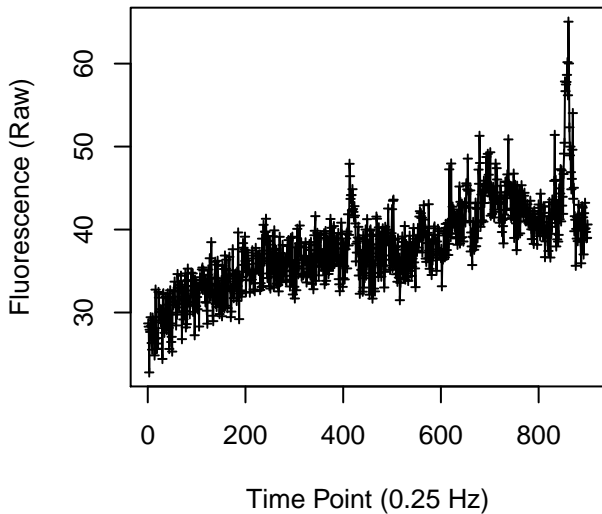

**Cell 1102**

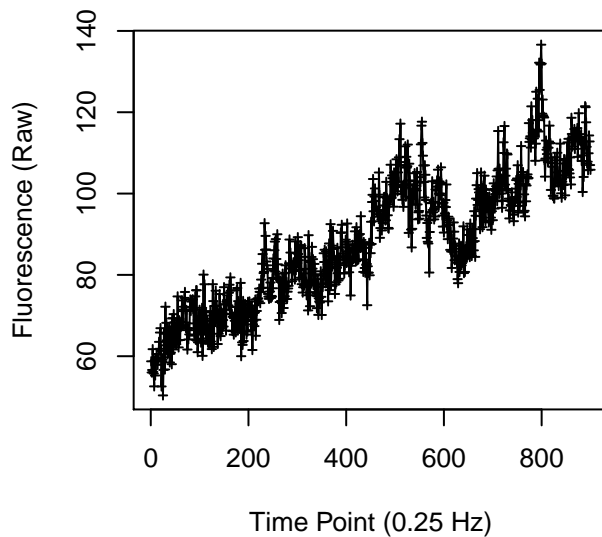

**Cell 1103**

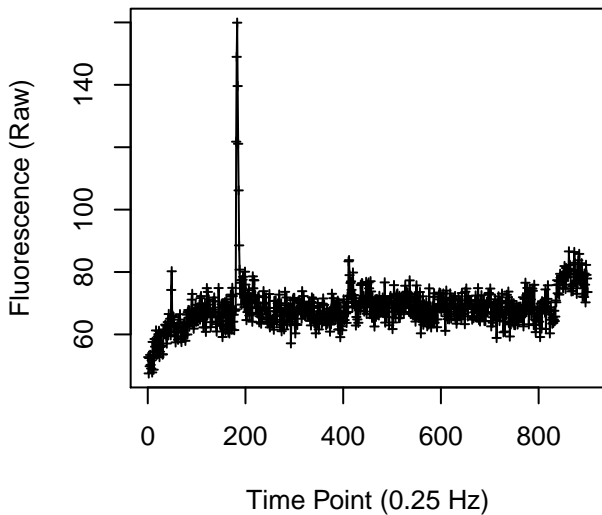

**Cell 1104**

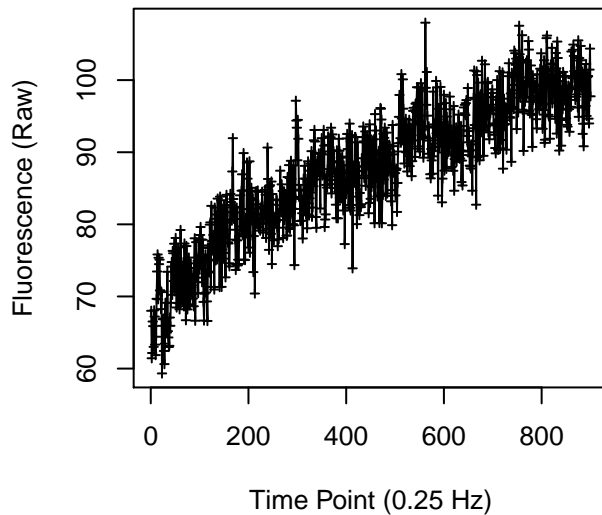

**Cell 1105**

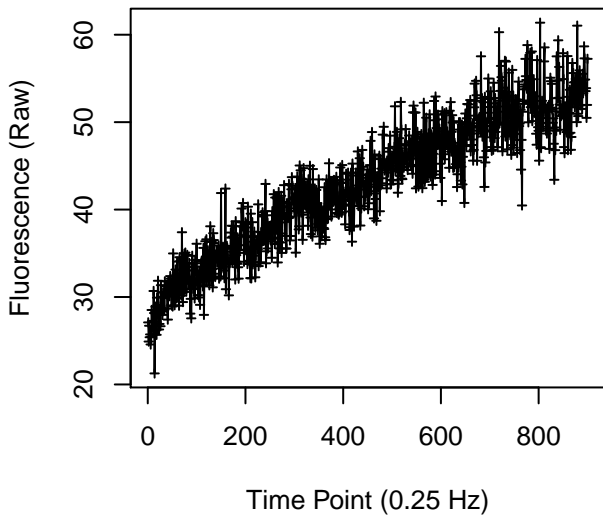

**Cell 1106**

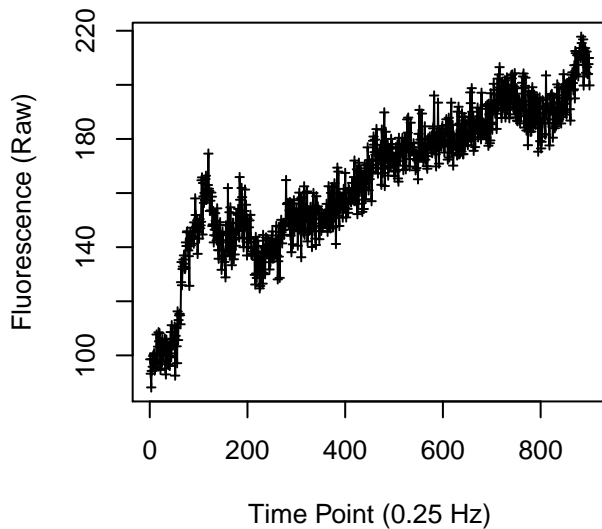

**Cell 1107**

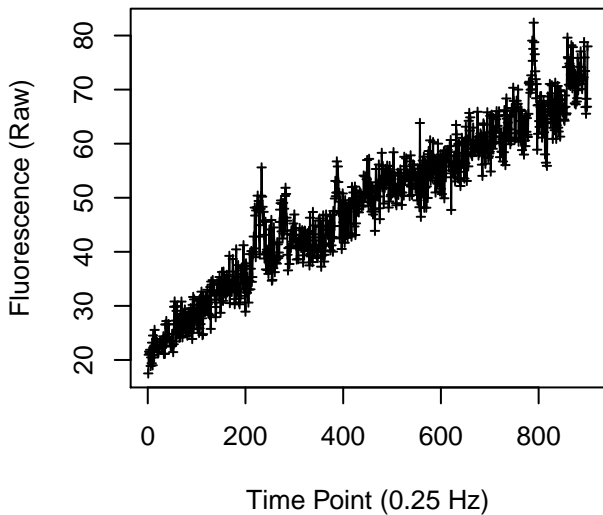

**Cell 1108**

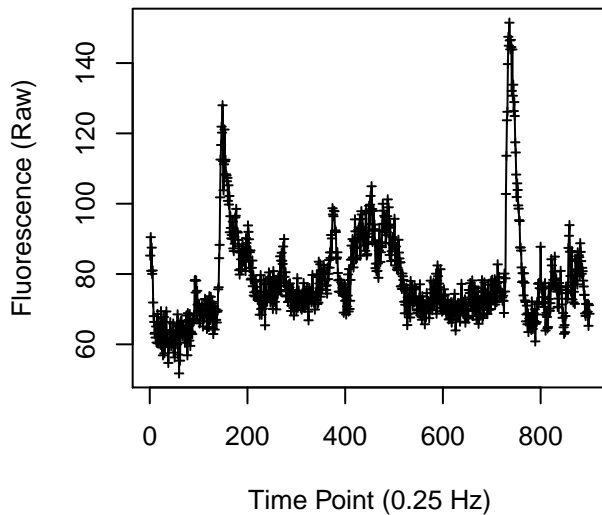

**Cell 1109**

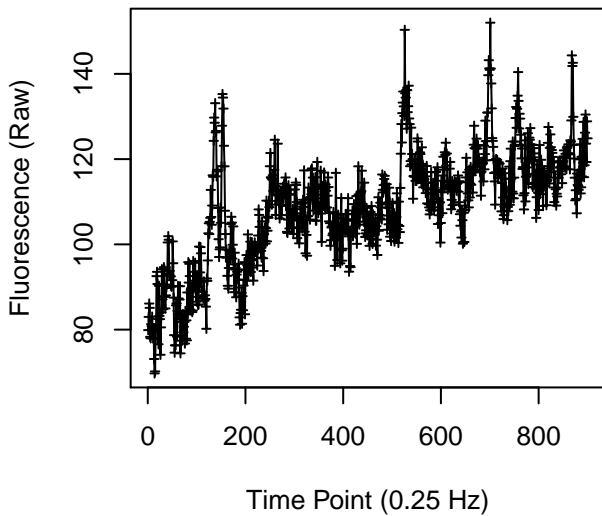

**Cell 1110**

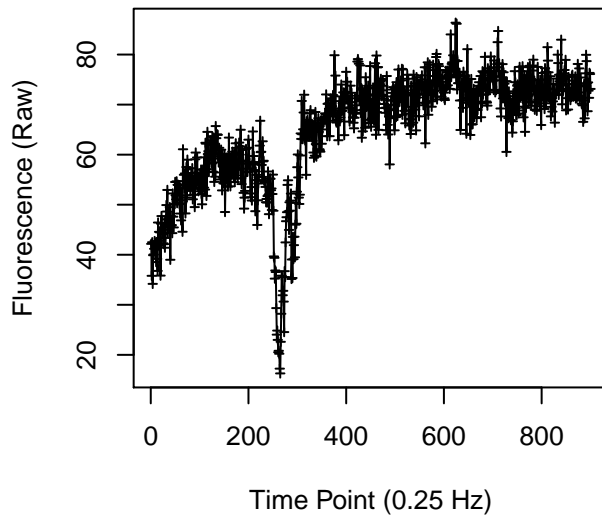

**Cell 1111**

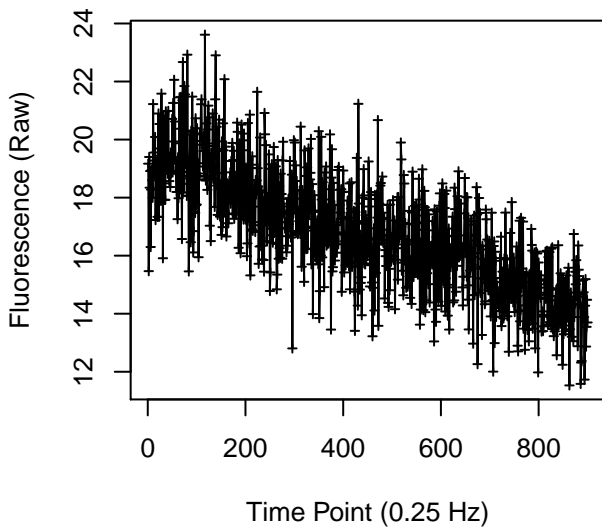

**Cell 1112**

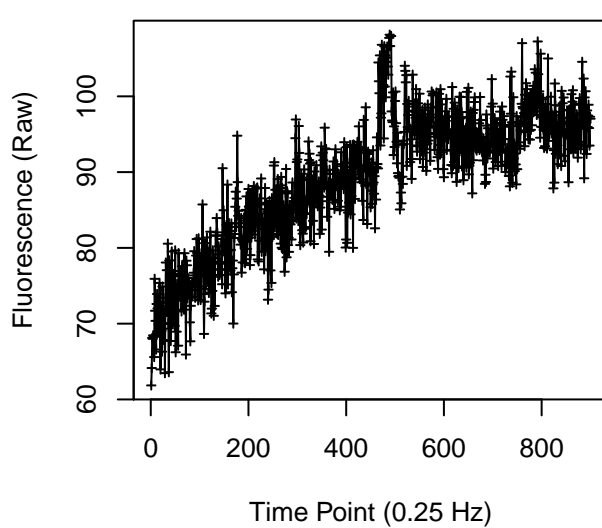

**Cell 1113**

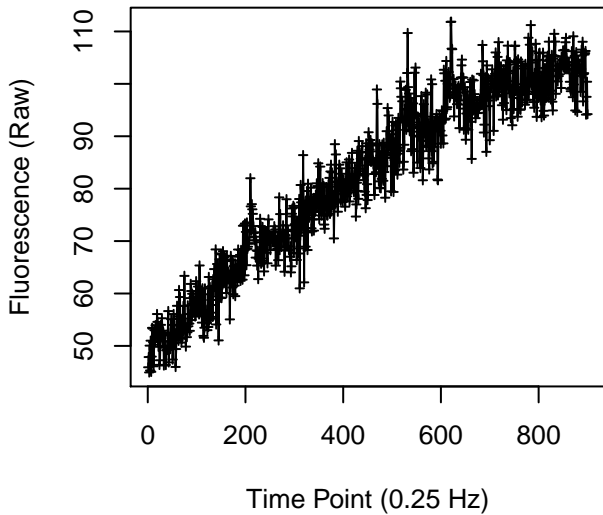

**Cell 1114**

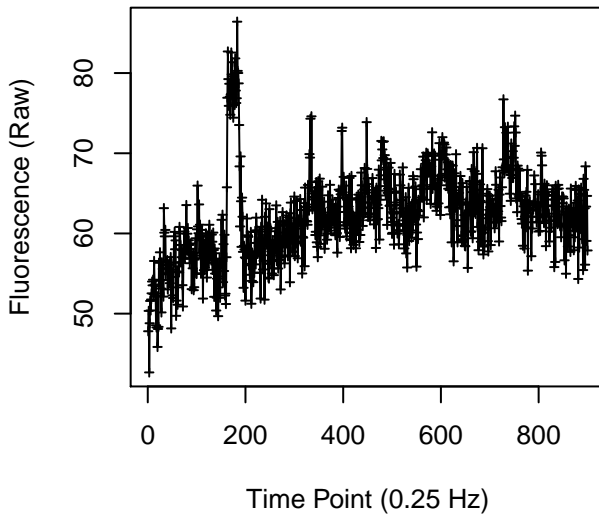

**Cell 1115**

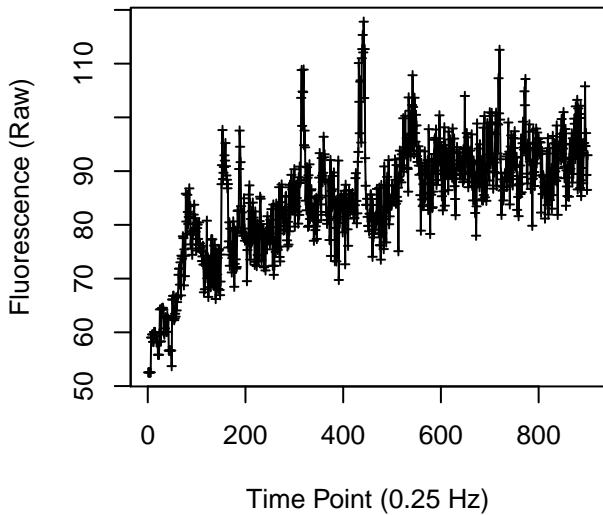

**Cell 1116**

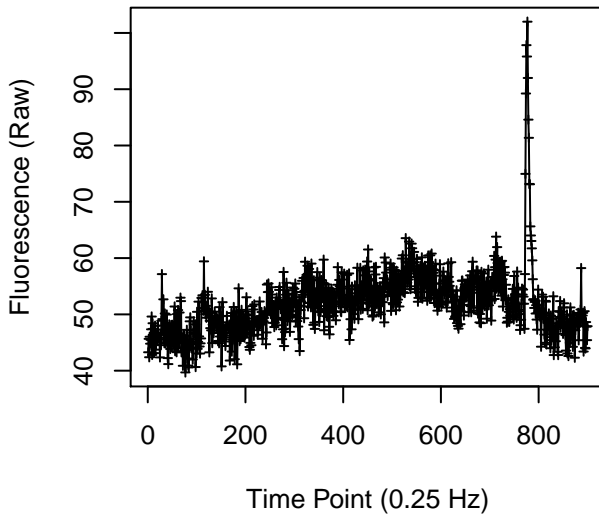

**Cell 1117**

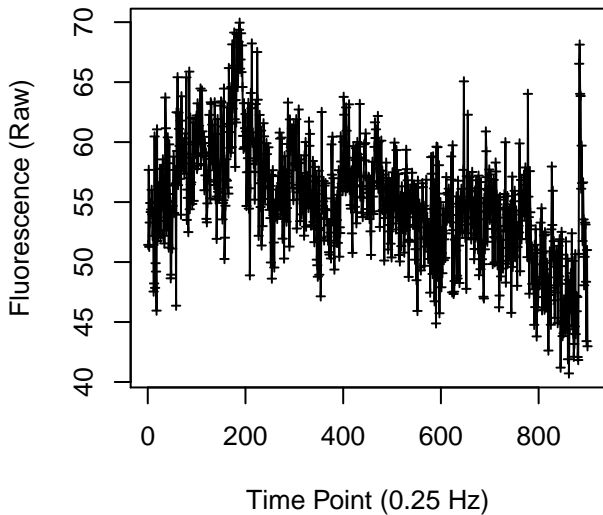

**Cell 1118**

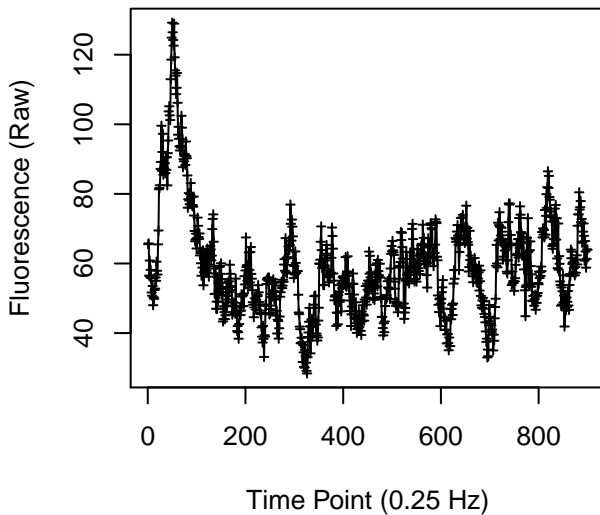

**Cell 1119**

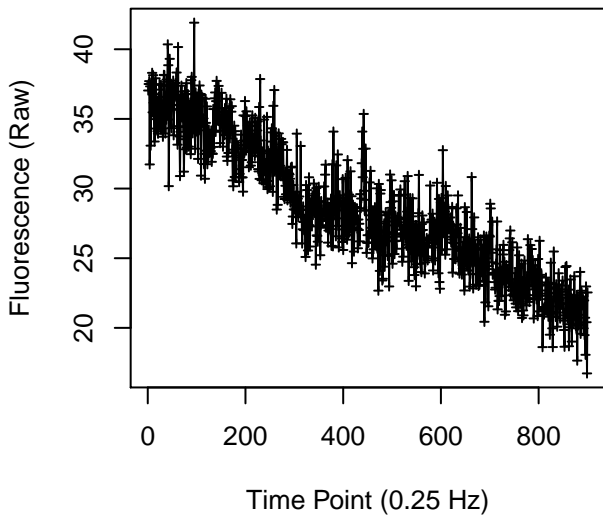

**Cell 1120**

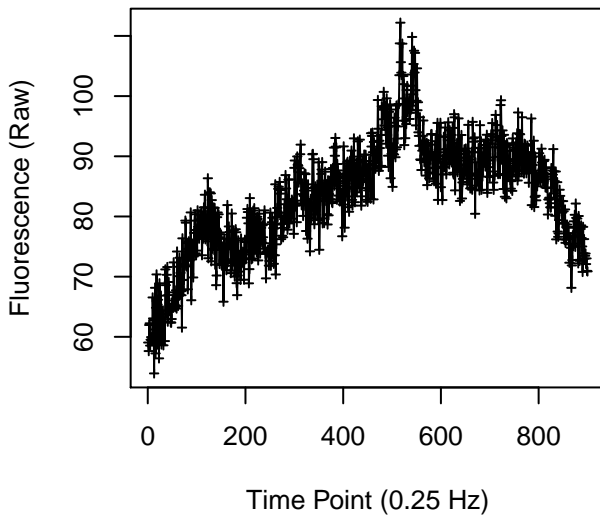

**Cell 1121**

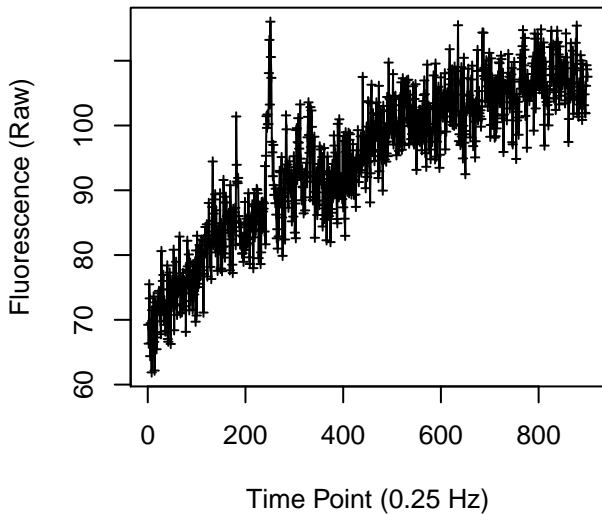

**Cell 1122**

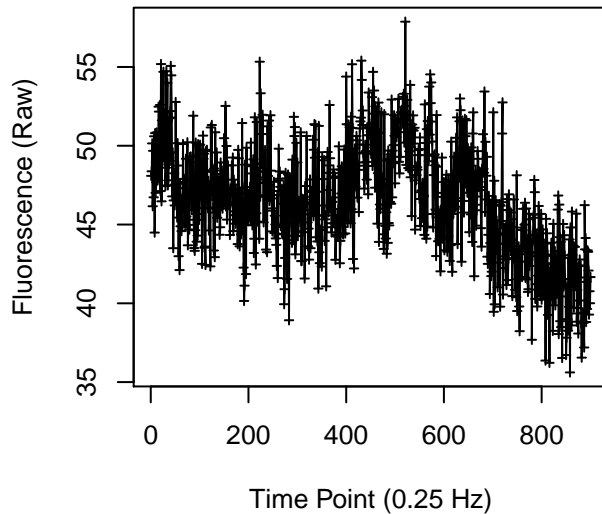

**Cell 1123**

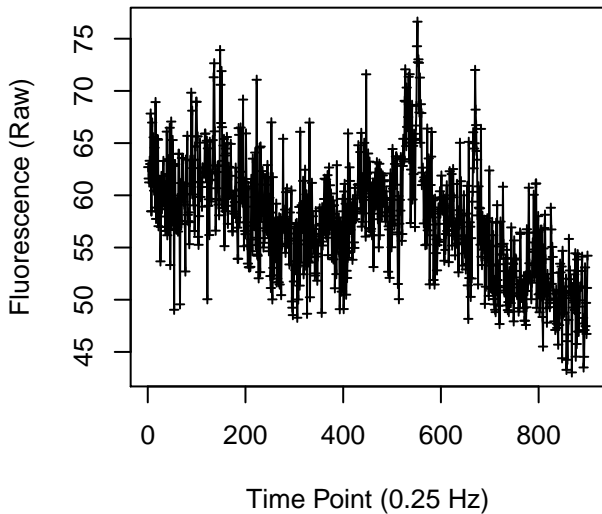

**Cell 1124**

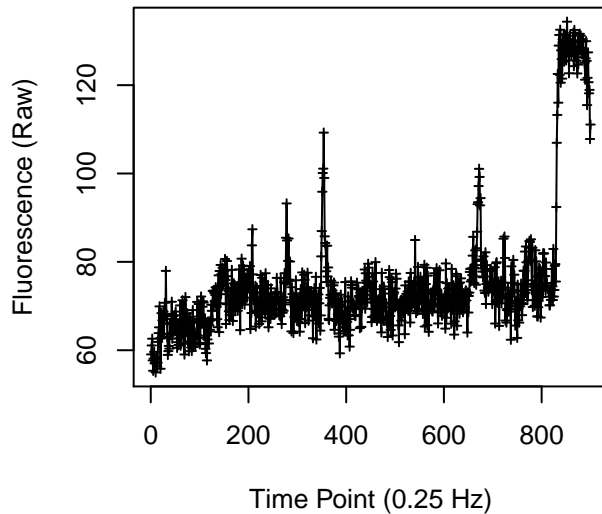

**Cell 1125**

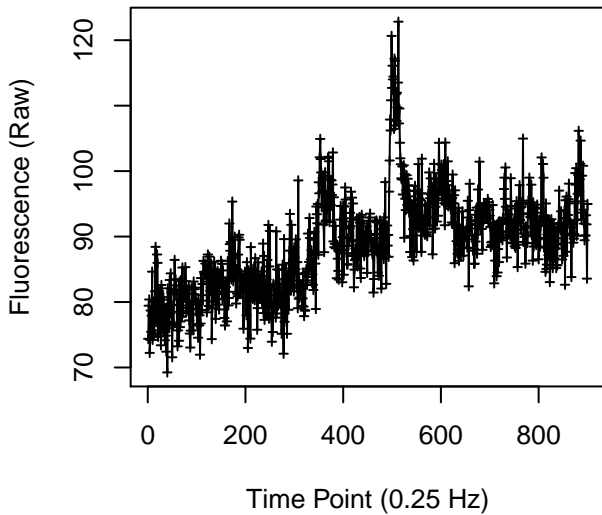

**Cell 1126**

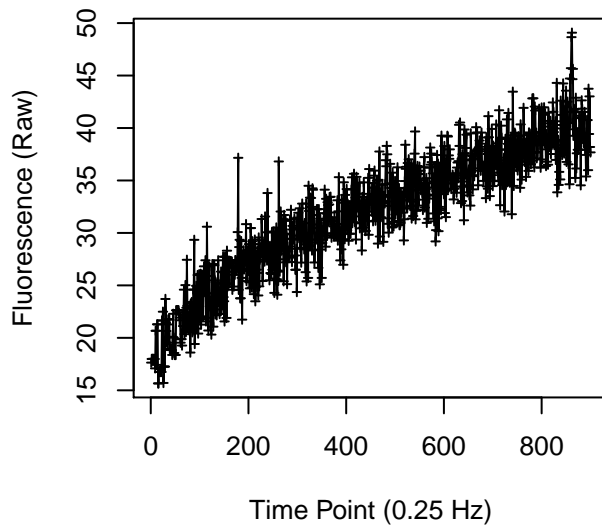

**Cell 1127**

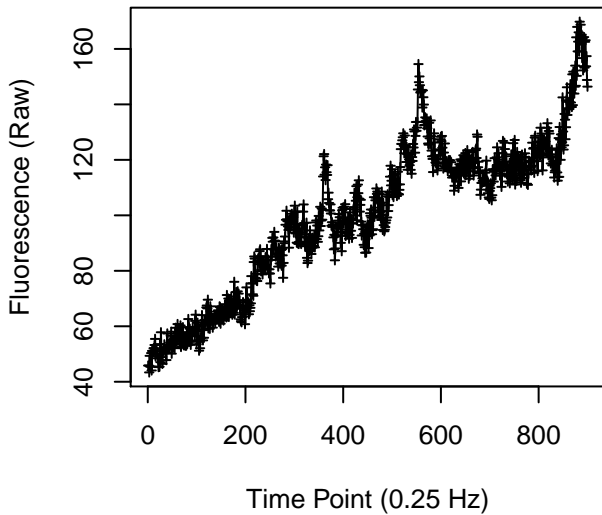

**Cell 1128**

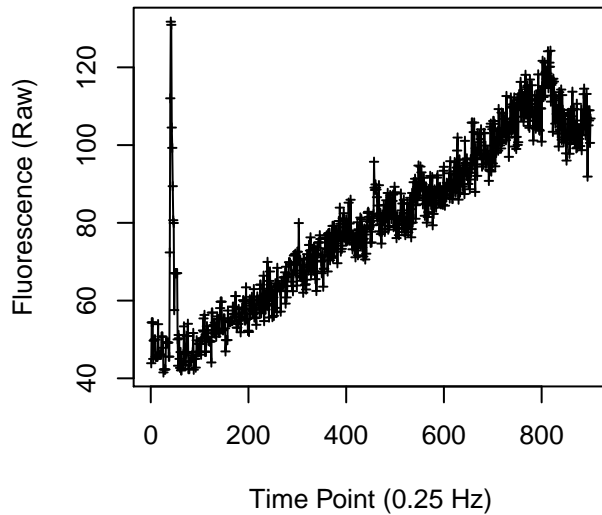



**Cell 1129**

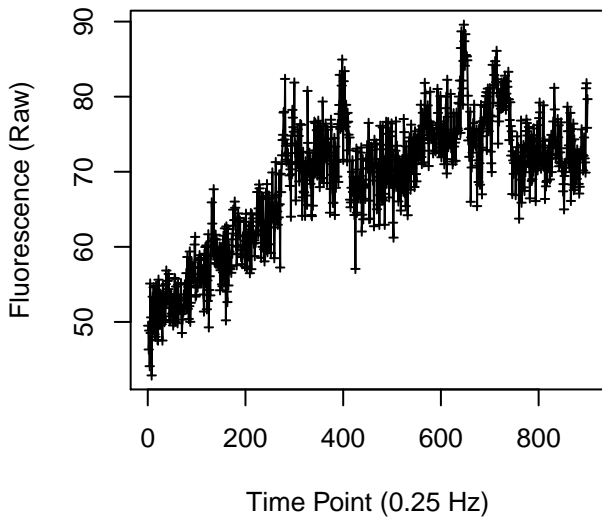

**Cell 1130**

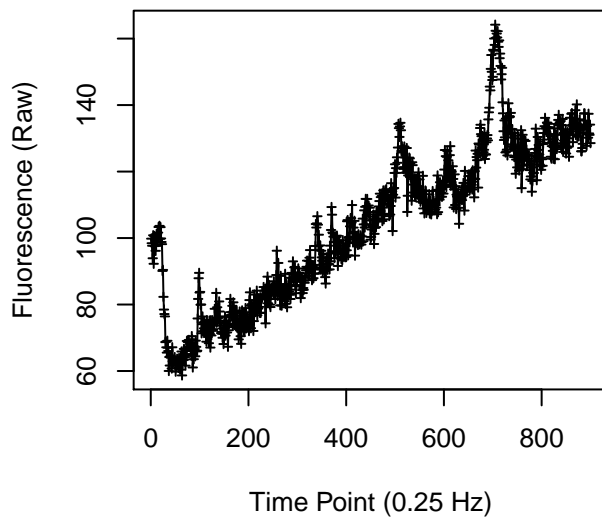

**Cell 1131**

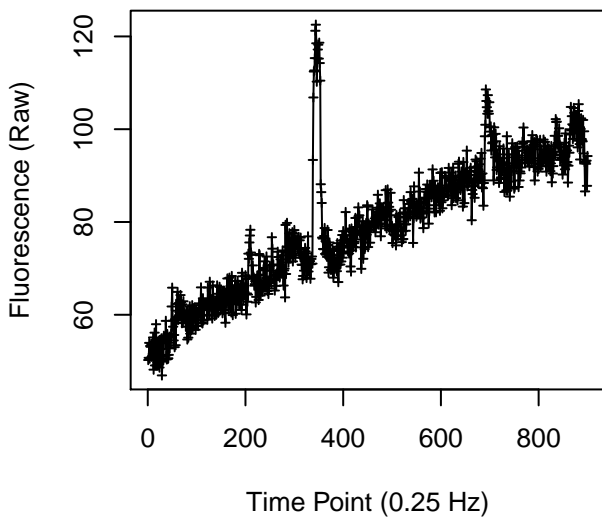

**Cell 1132**

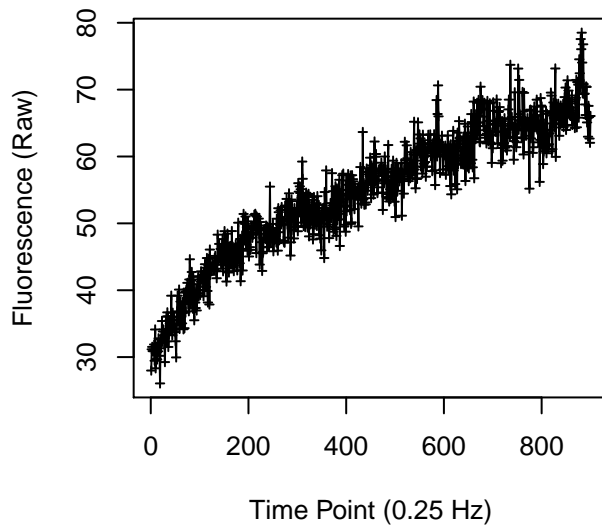

**Cell 1133**

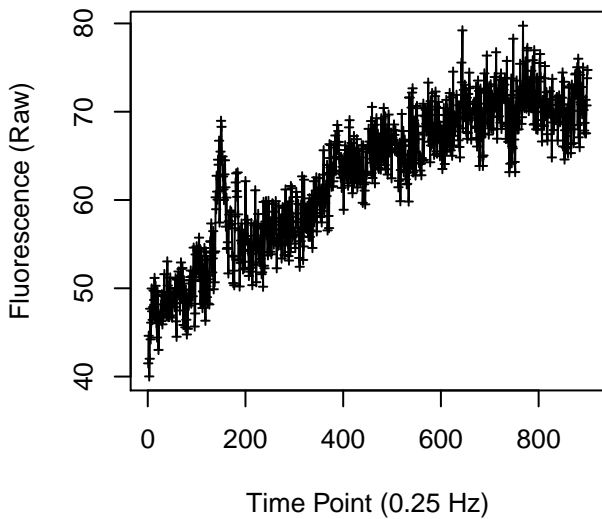

**Cell 1134**

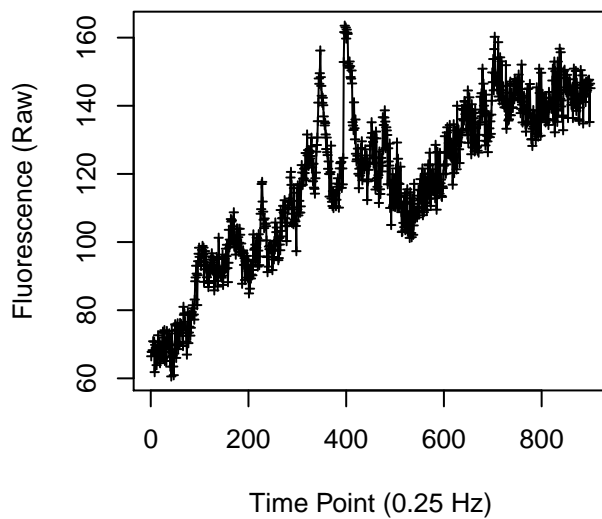

**Cell 1135**

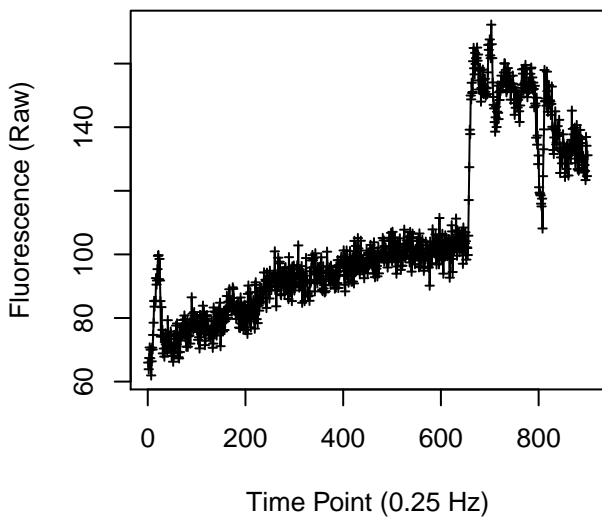

**Cell 1136**

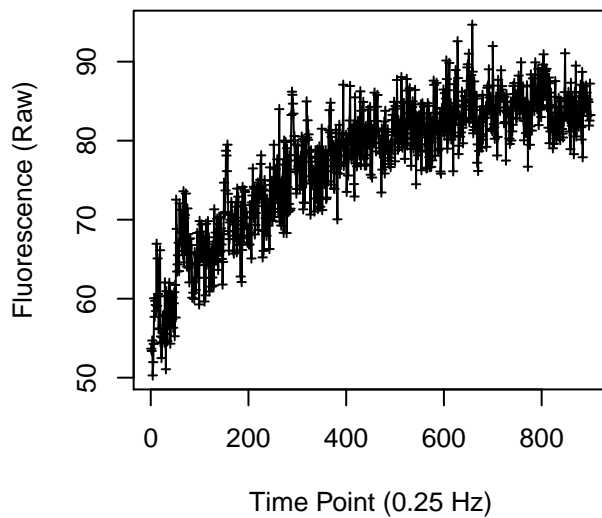

**Cell 1137**

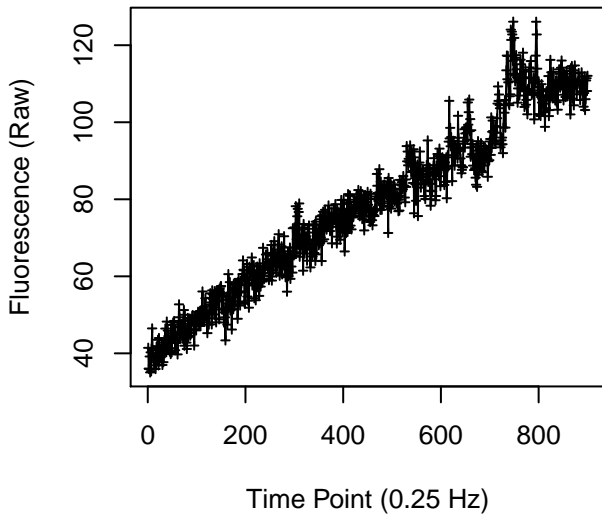

**Cell 1138**

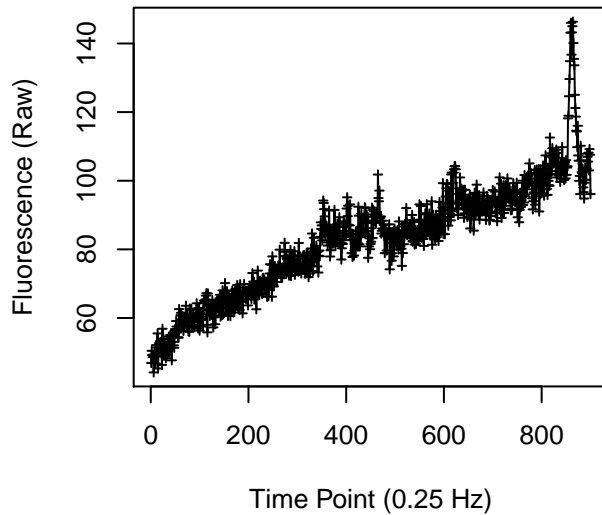

**Cell 1139**

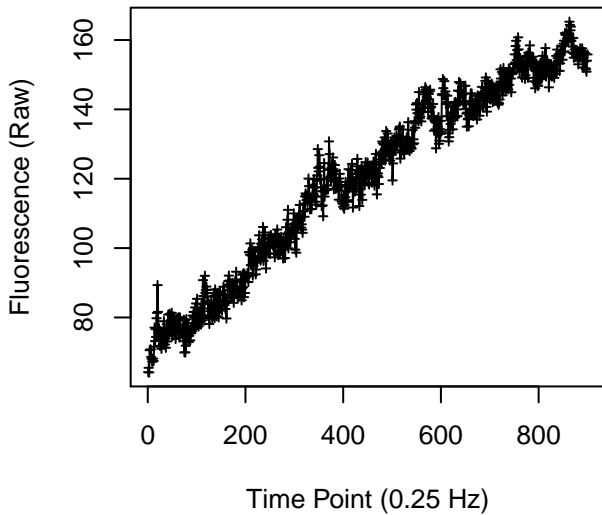

**Cell 1140**

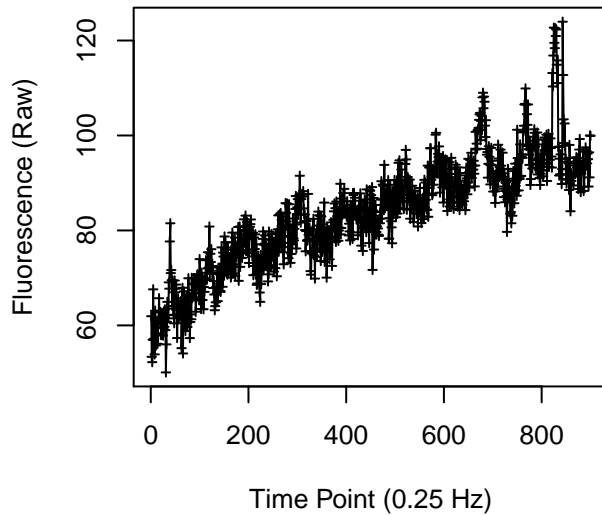

**Cell 1141**

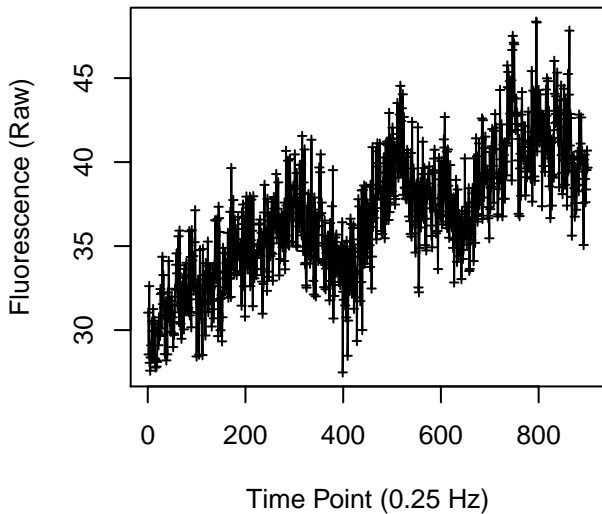

**Cell 1142**

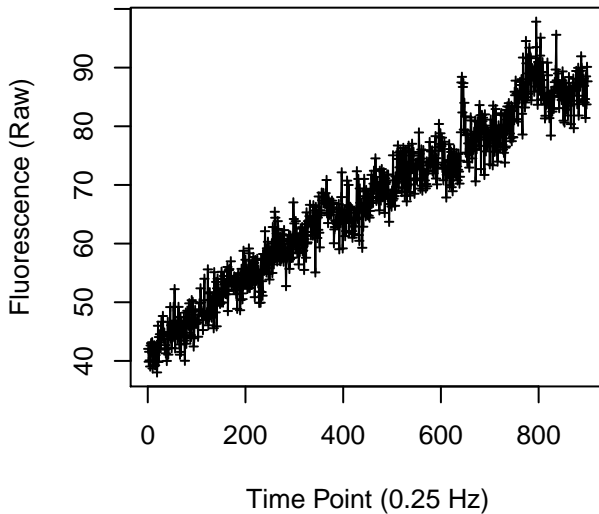

**Cell 1143**

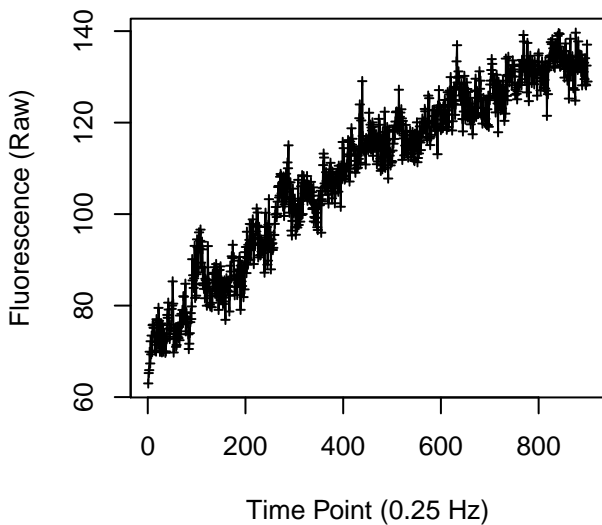

**Cell 1144**

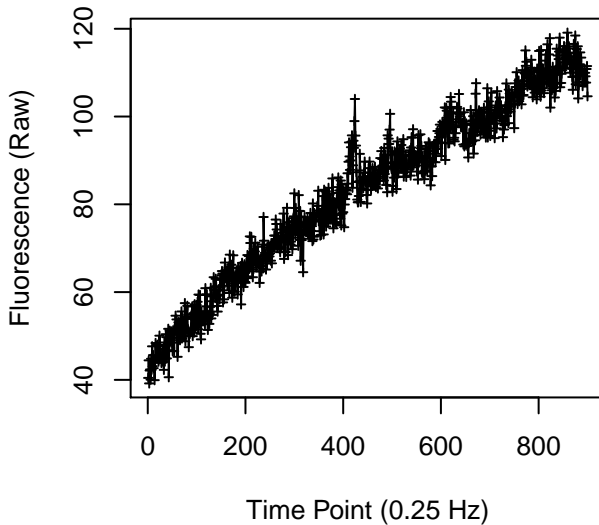

**Cell 1145**

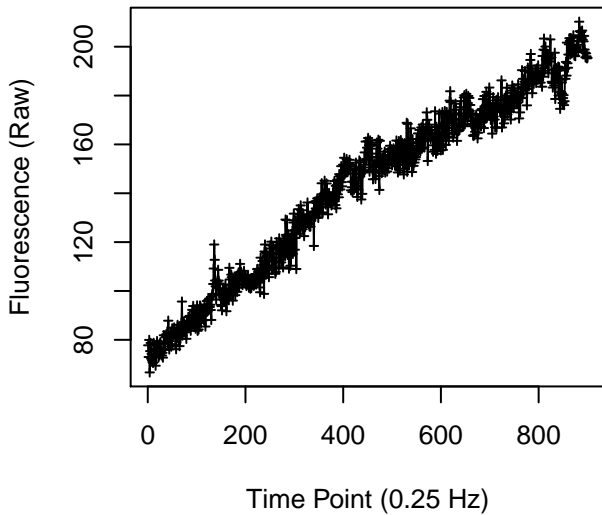

**Cell 1146**

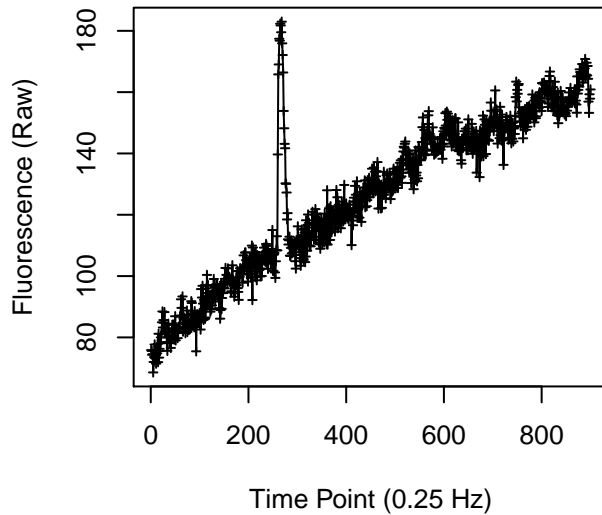

**Cell 1147**

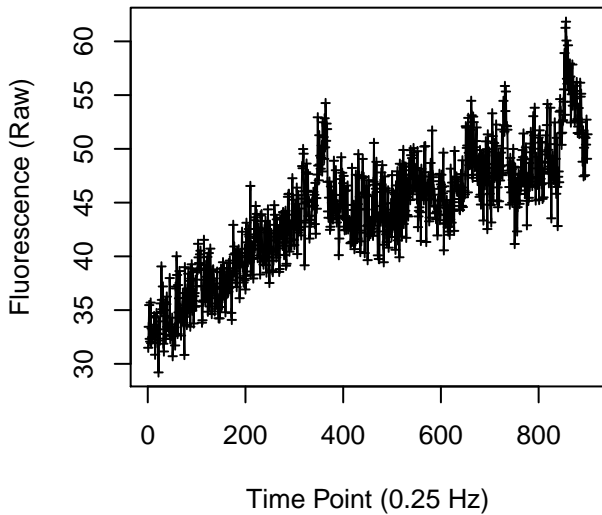

**Cell 1148**

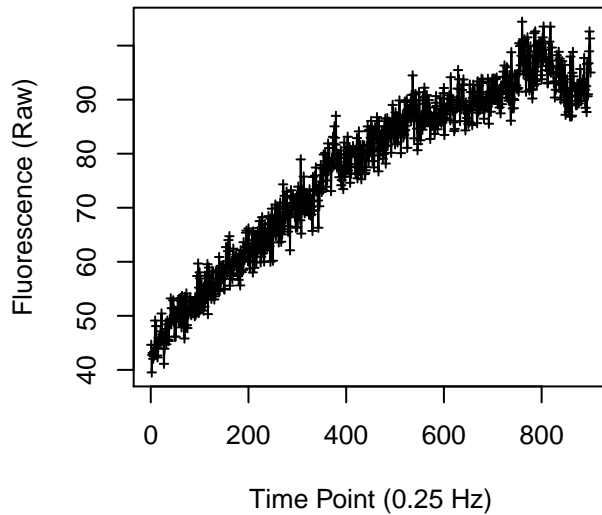

**Cell 1149**

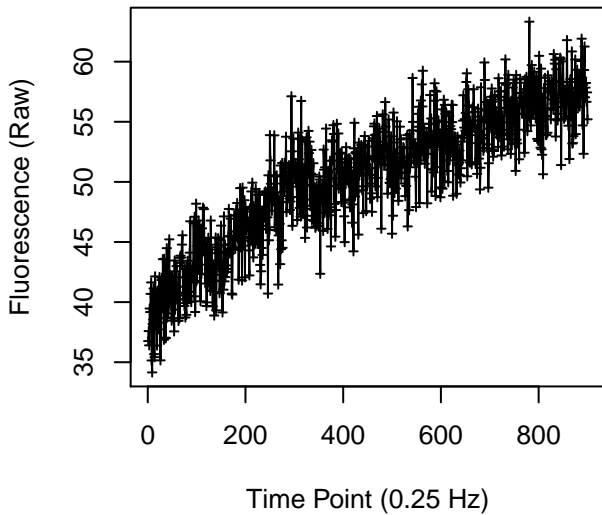

**Cell 1150**

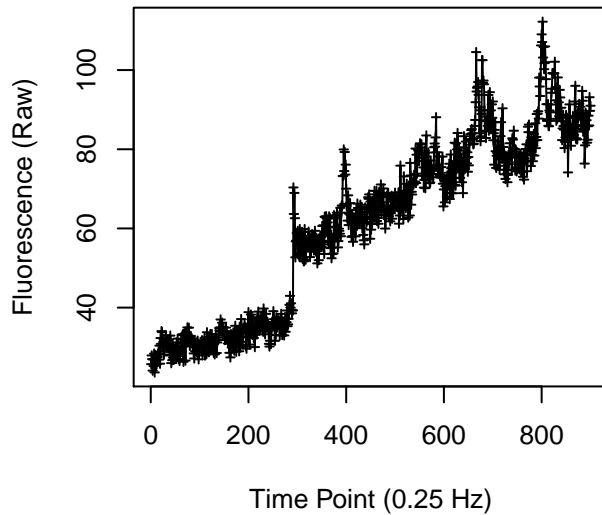

**Cell 1151**

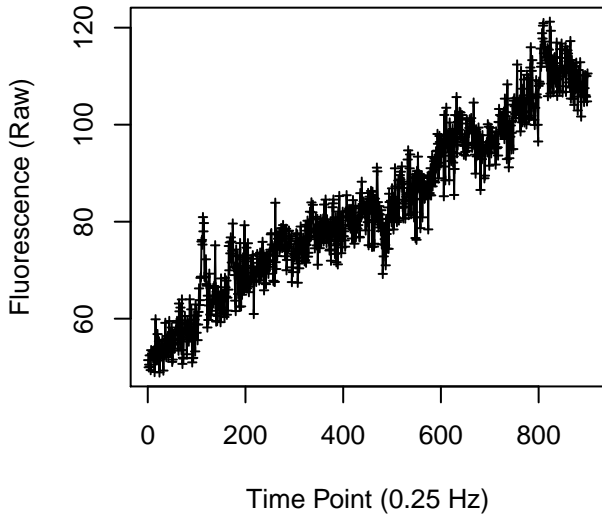

**Cell 1152**

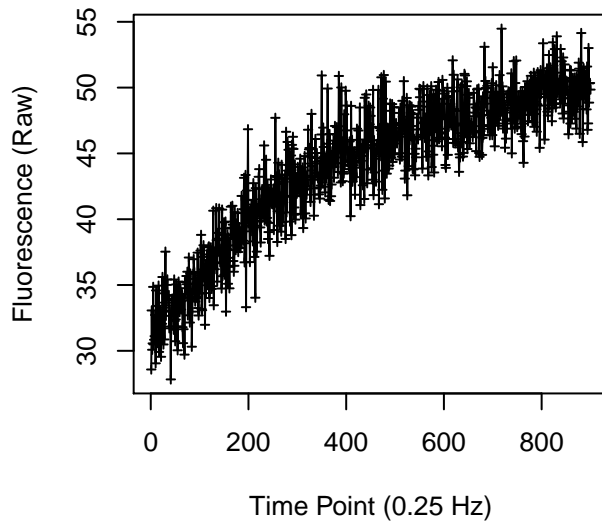

**Cell 1153**

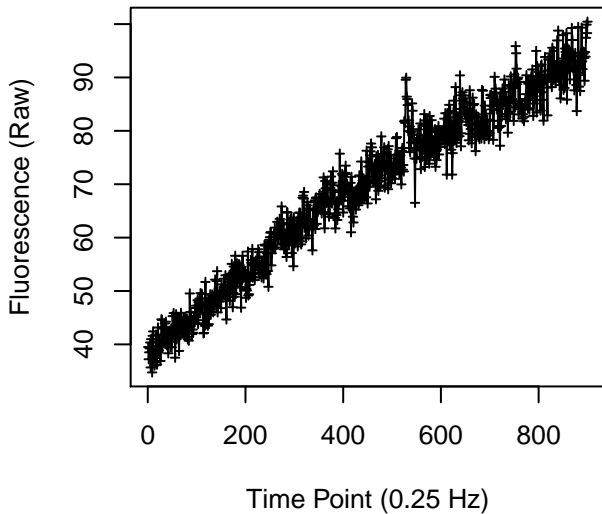

**Cell 1154**

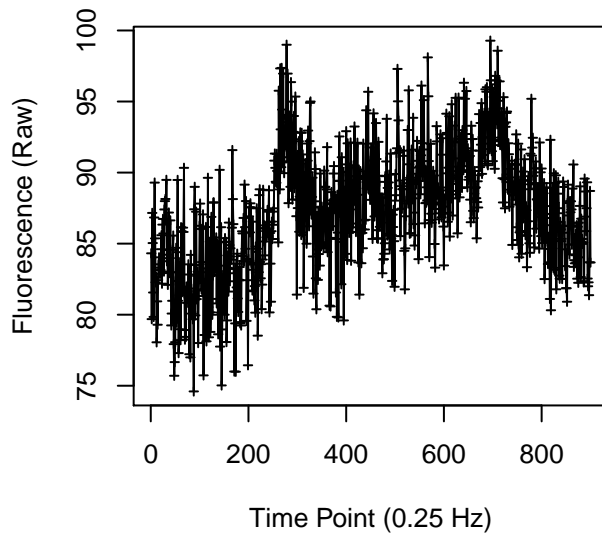

**Cell 1155**

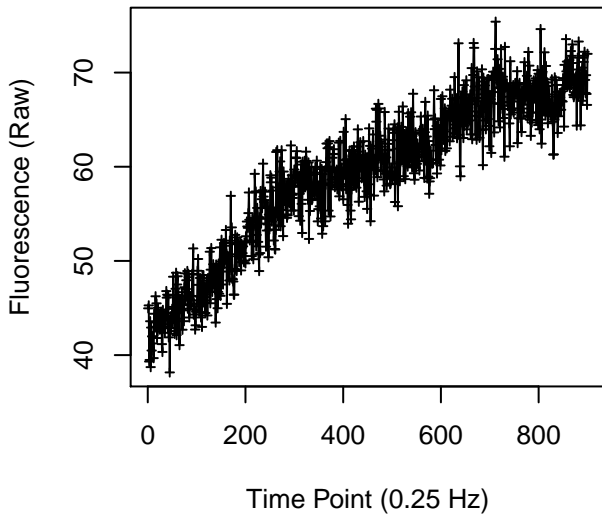

**Cell 1156**

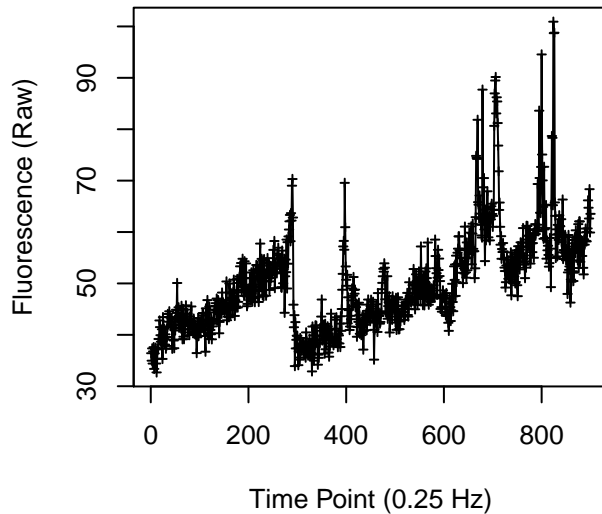

**Cell 1157**

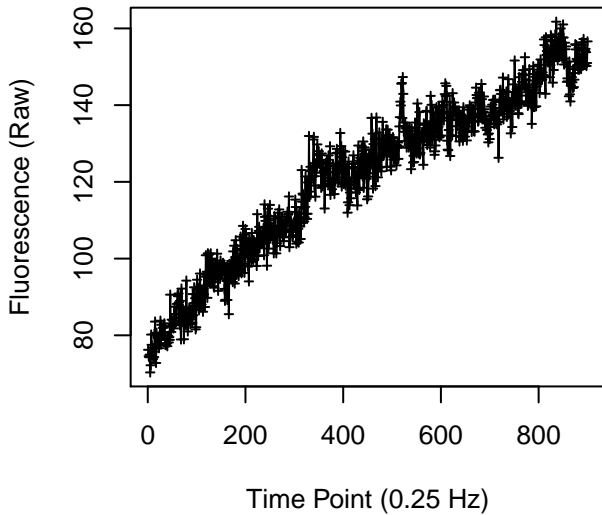

**Cell 1158**

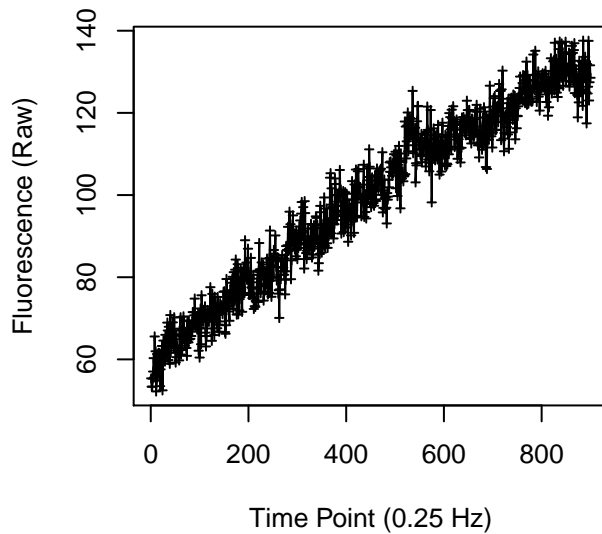

**Cell 1159**

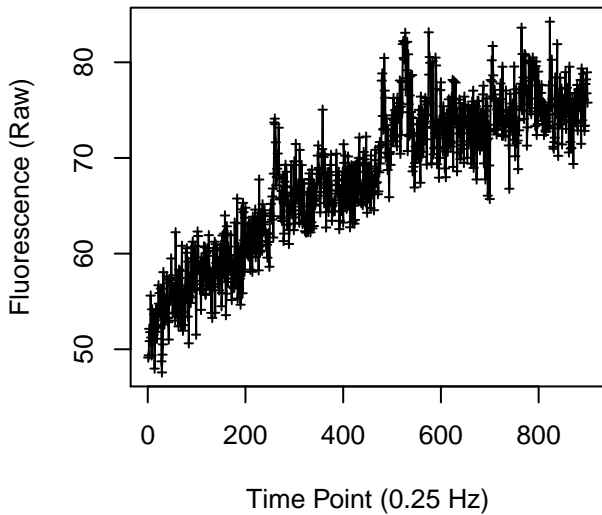

**Cell 1160**

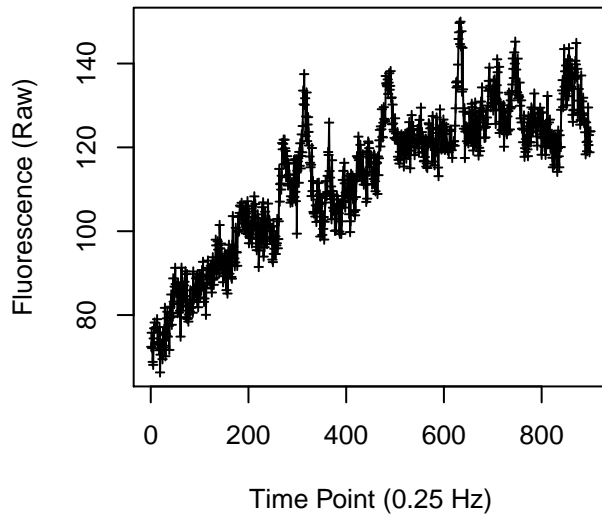



**Cell 1161**

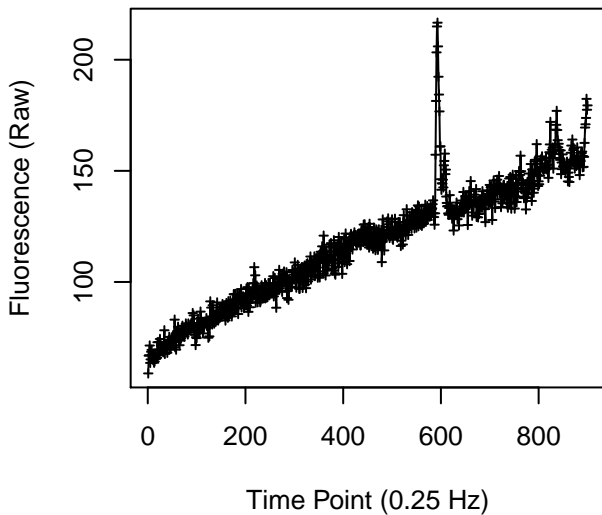

**Cell 1162**

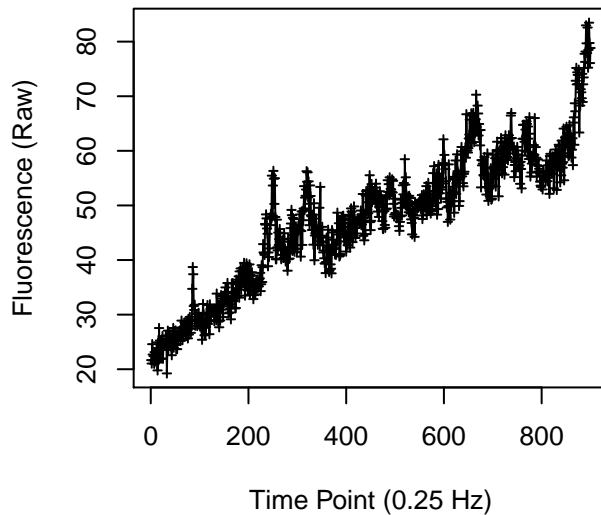

**Cell 1163**

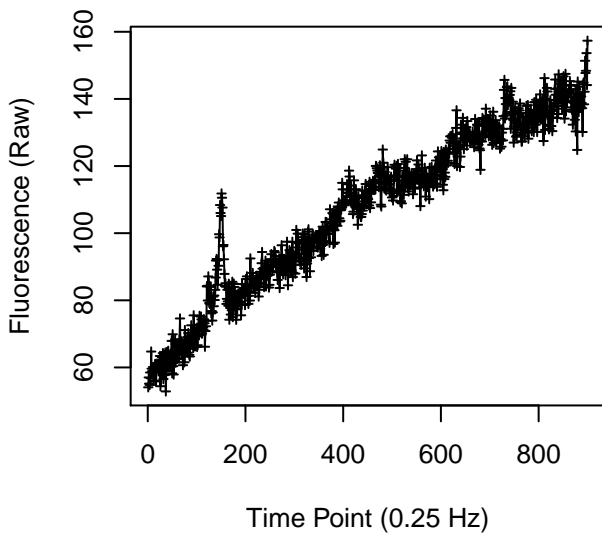

**Cell 1164**

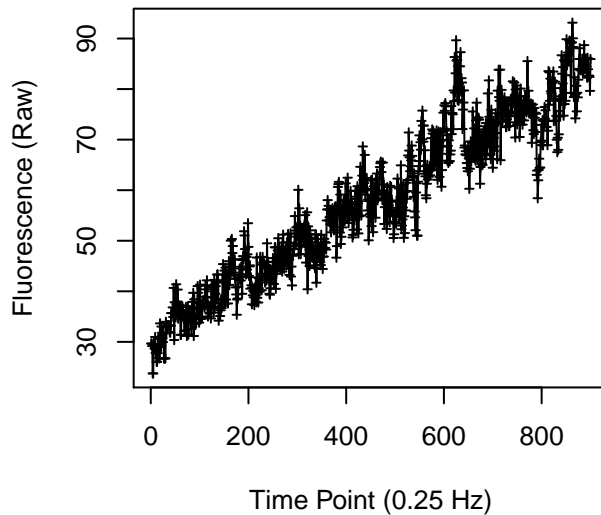

**Cell 1165**

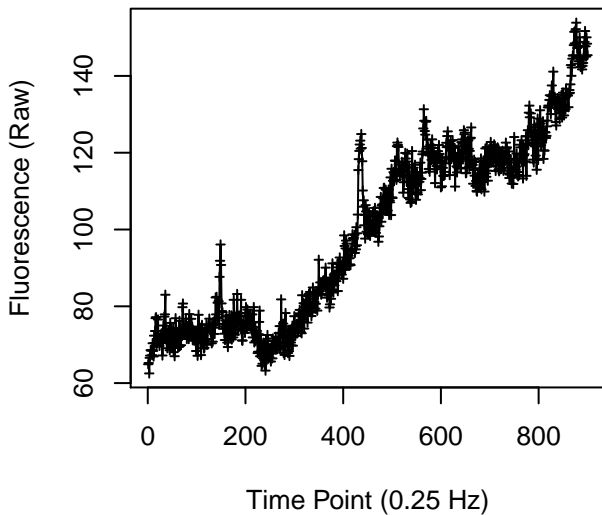

**Cell 1166**

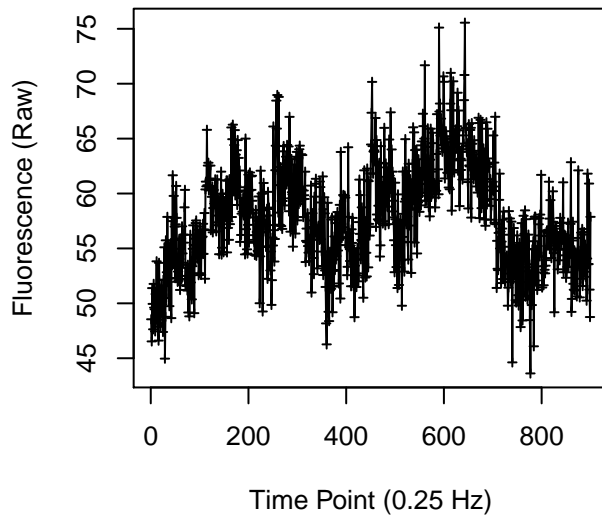

**Cell 1167**

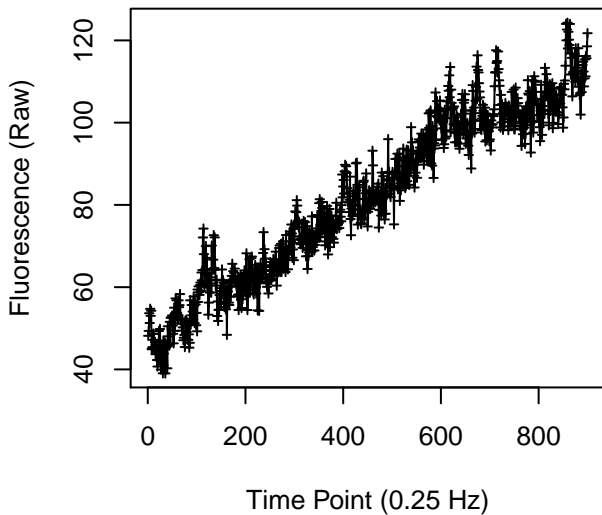

**Cell 1168**

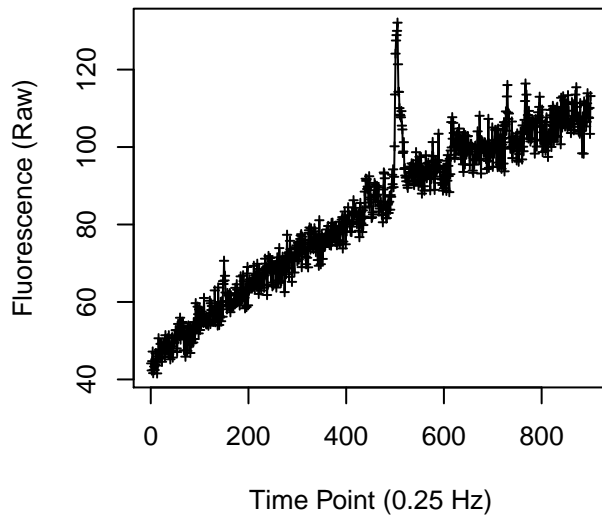

**Cell 1169**

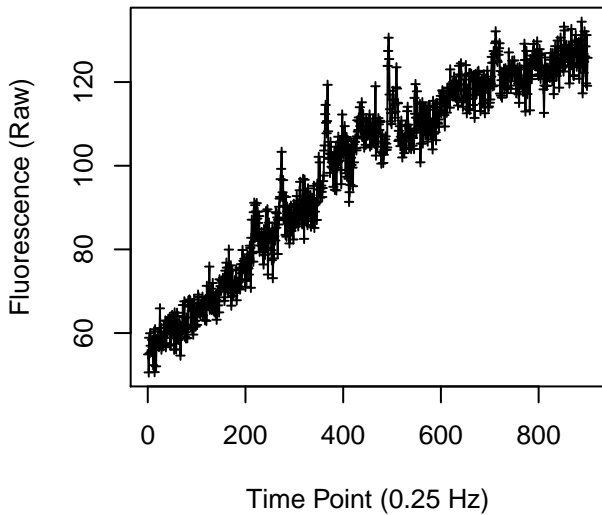

**Cell 1170**

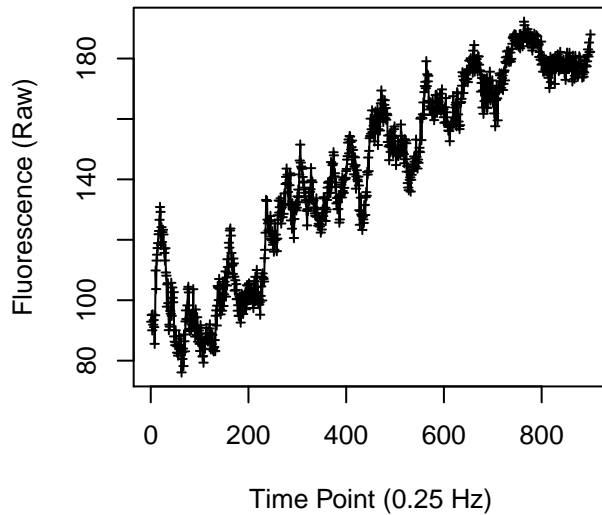

**Cell 1171**

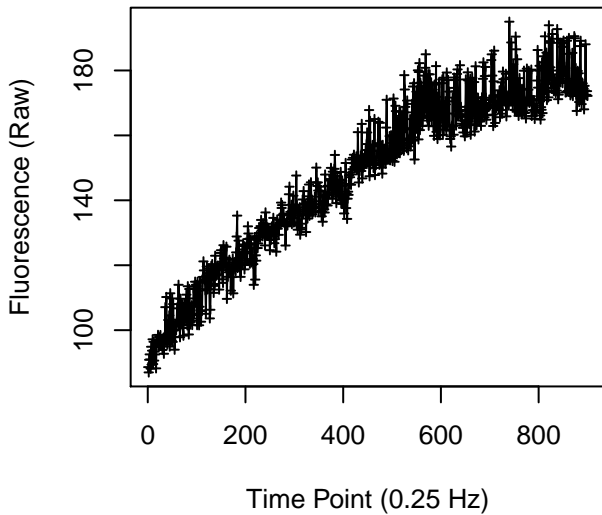

**Cell 1172**

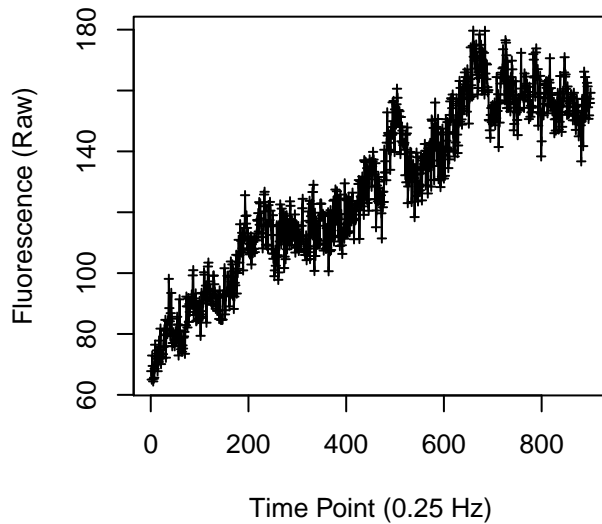

**Cell 1173**

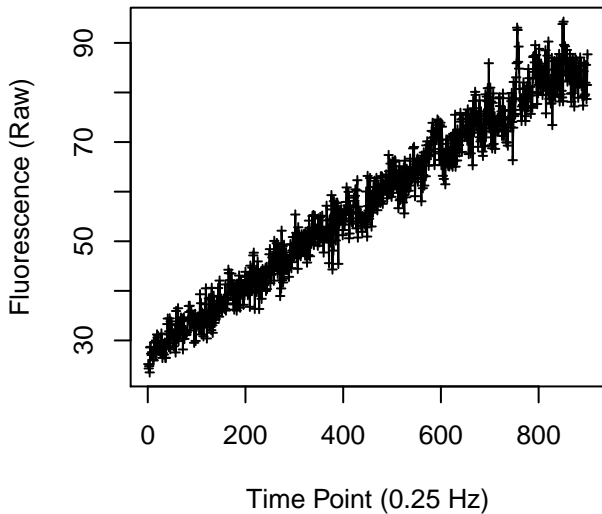

**Cell 1174**

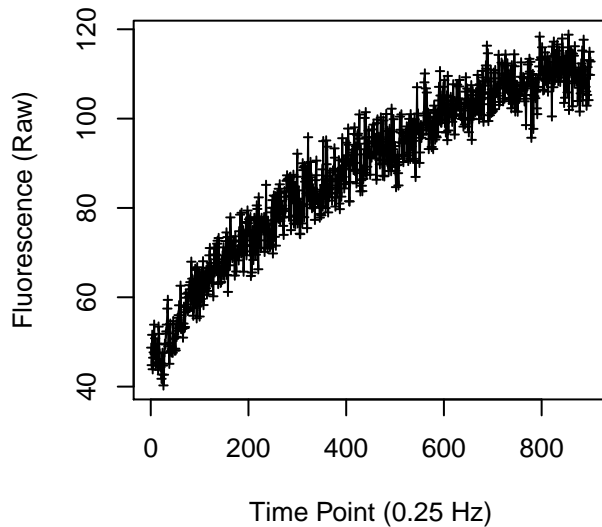

**Cell 1175**

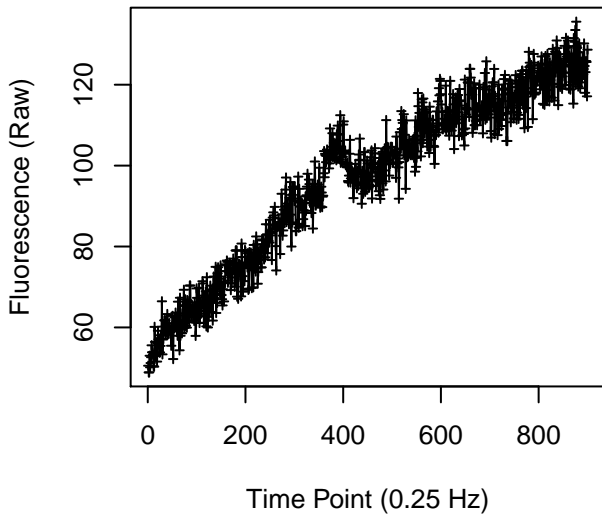

**Cell 1176**

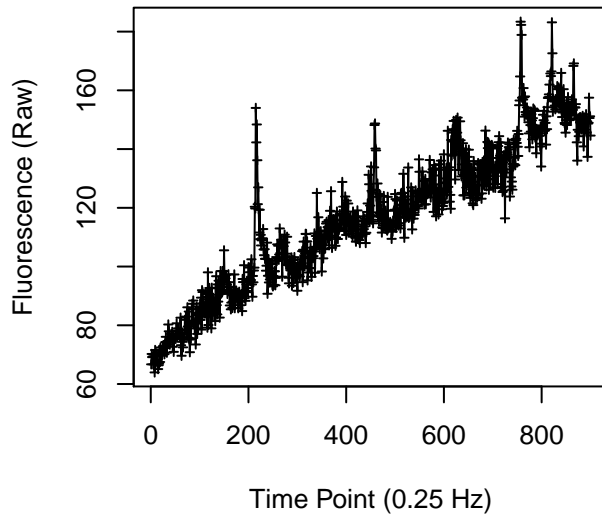

**Cell 1177**

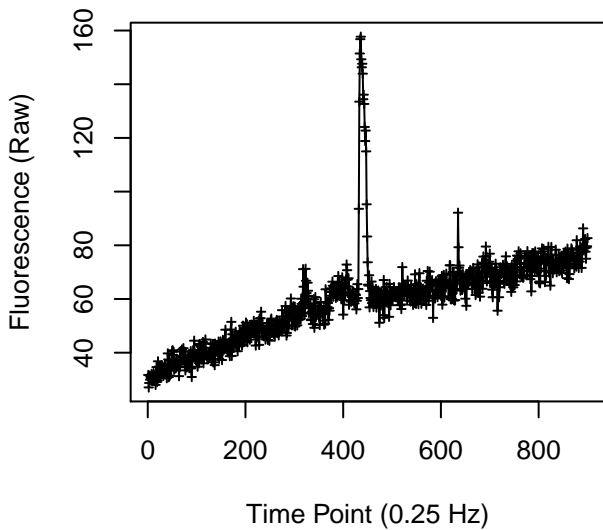

**Cell 1178**

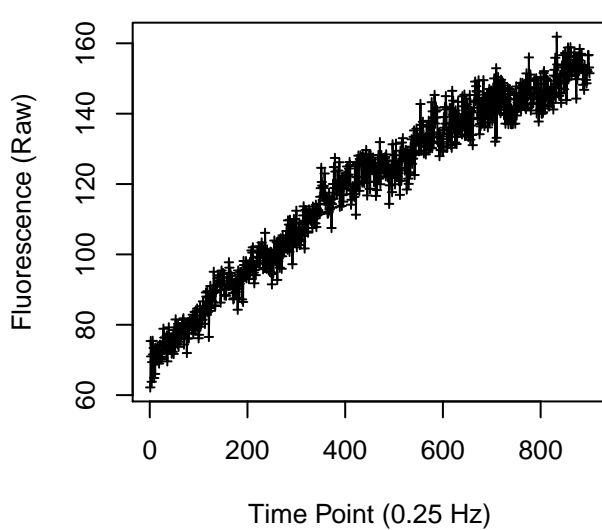

**Cell 1179**

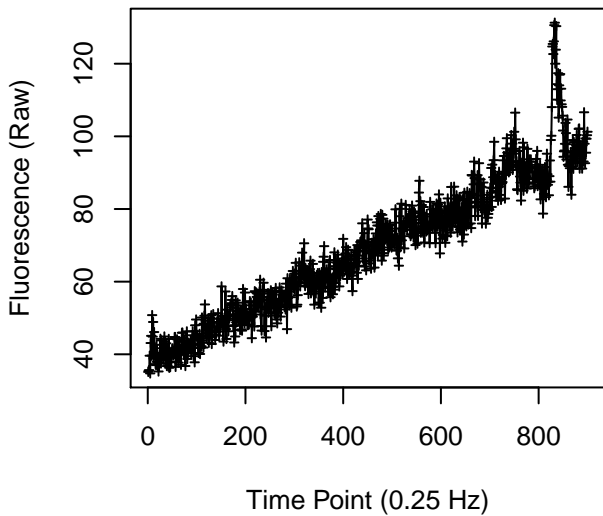

**Cell 1180**

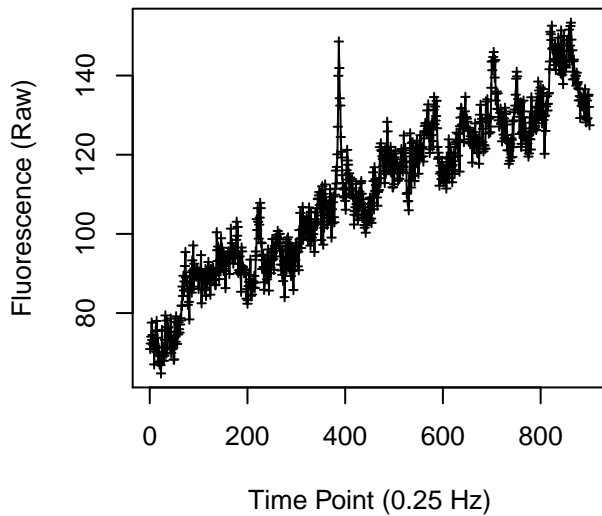

**Cell 1181**

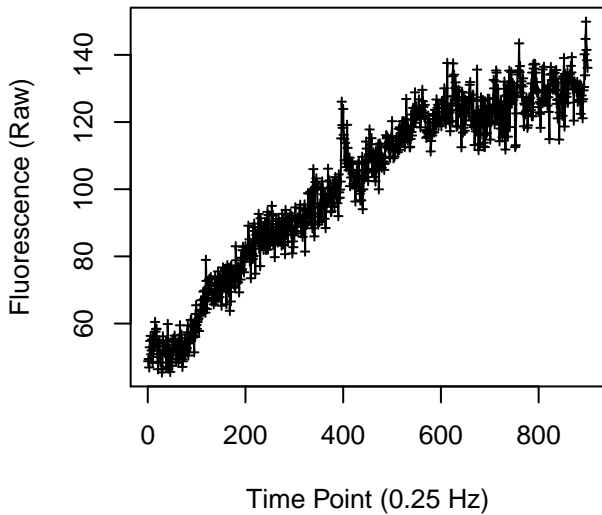

**Cell 1182**

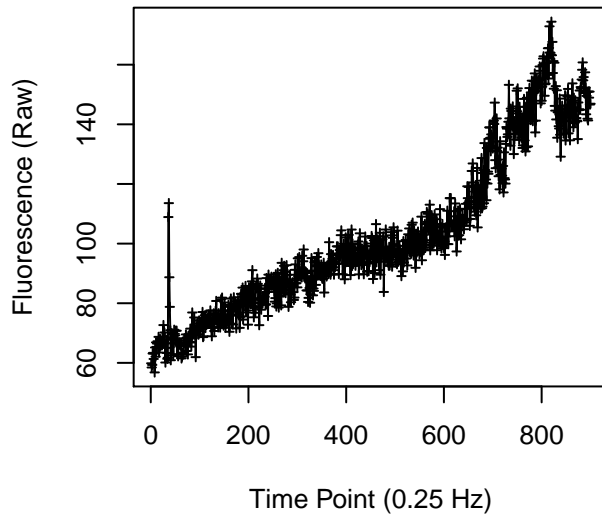

**Cell 1183**

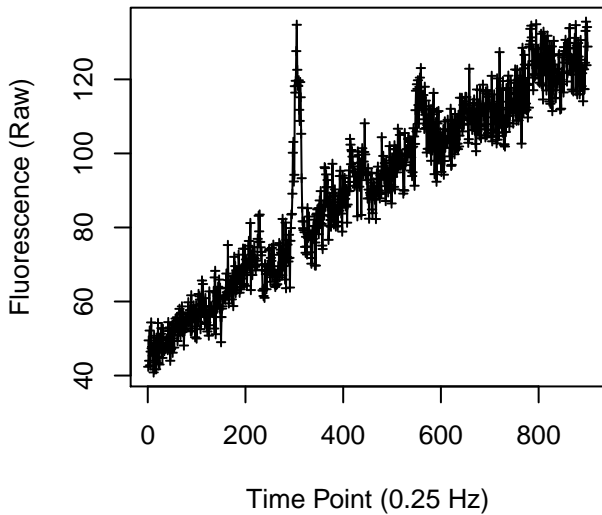

**Cell 1184**

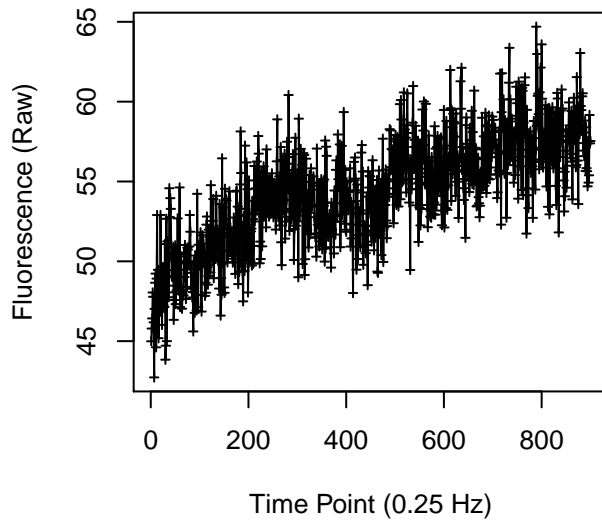

**Cell 1185**

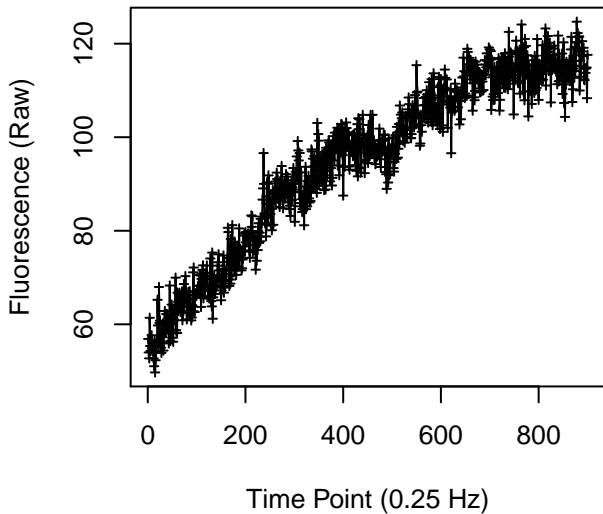

**Cell 1186**

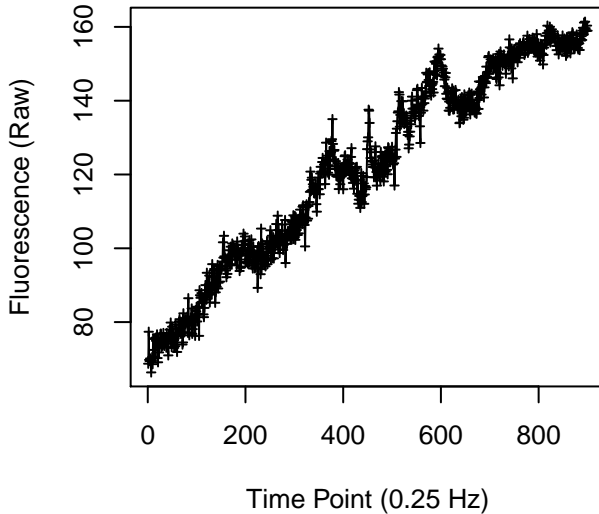

**Cell 1187**

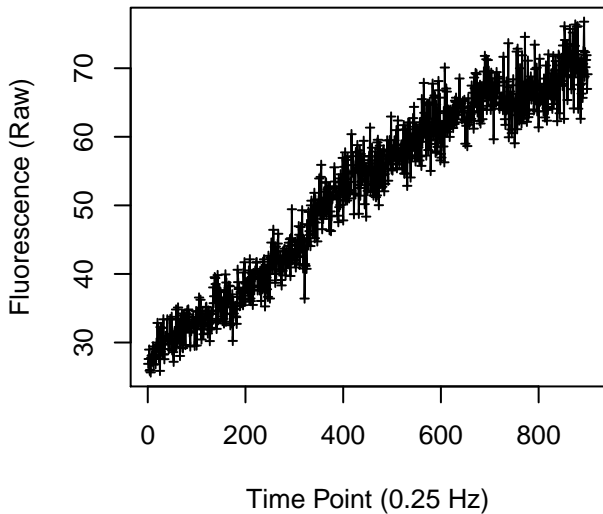

**Cell 1188**

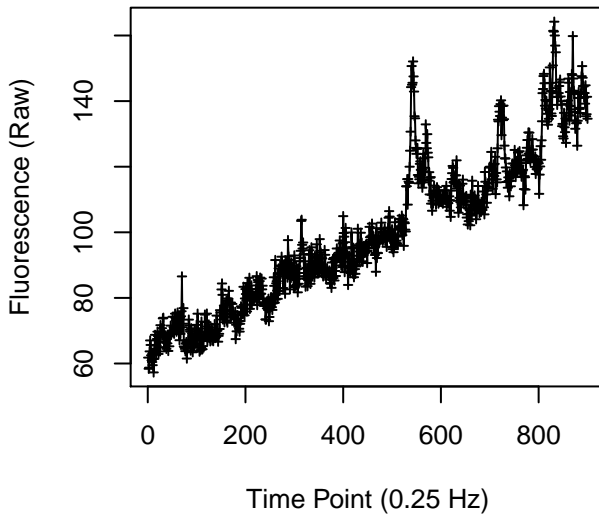

**Cell 1189**

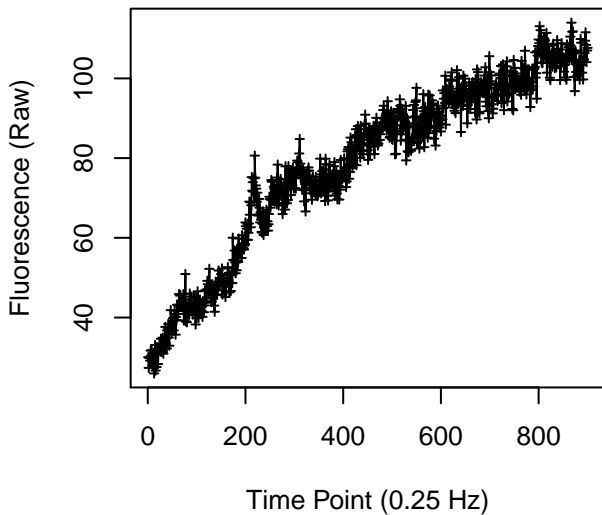

**Cell 1190**

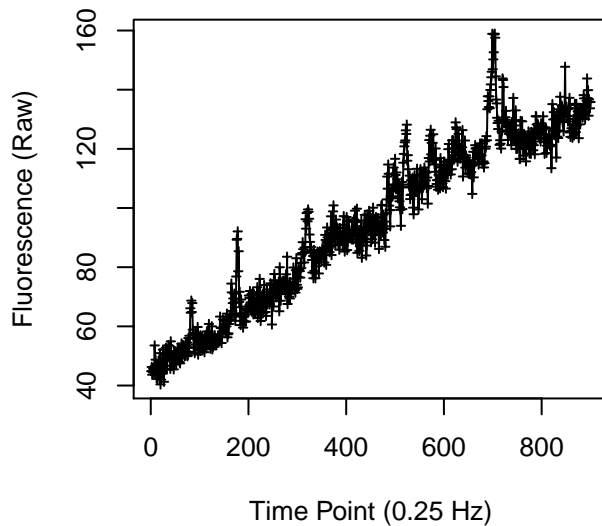

**Cell 1191**

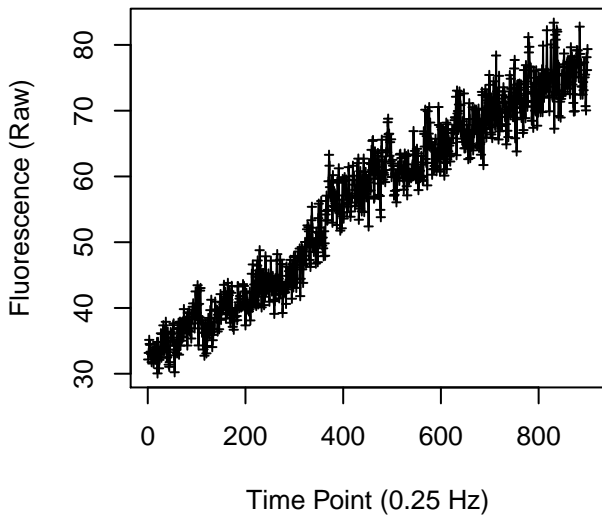

**Cell 1192**

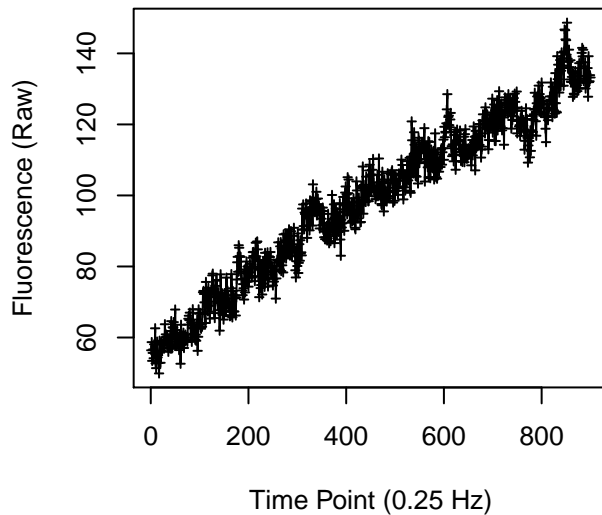



**Cell 1193**

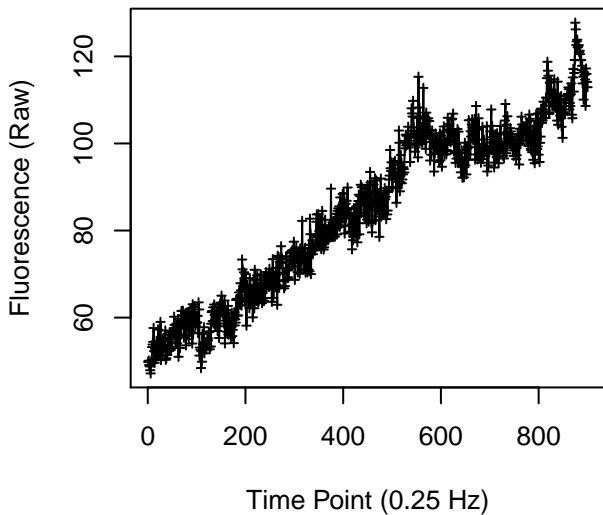

**Cell 1194**

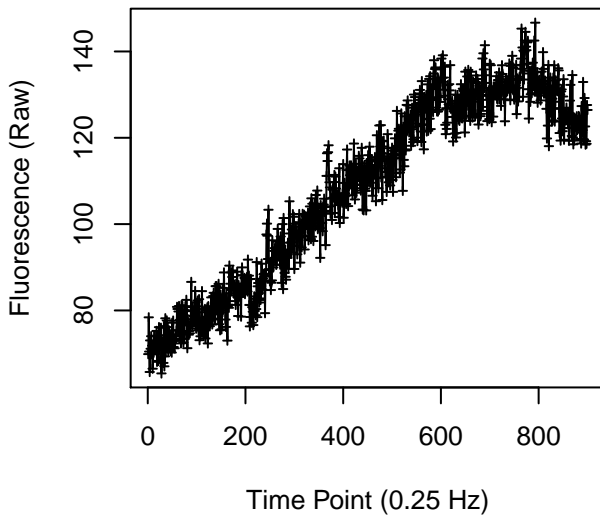

**Cell 1195**

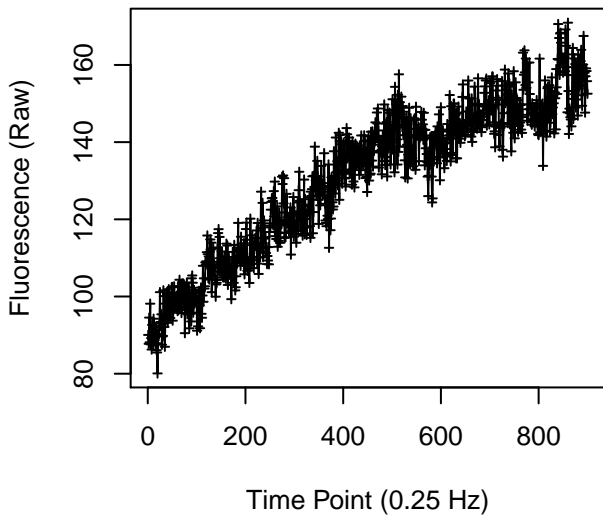

**Cell 1196**

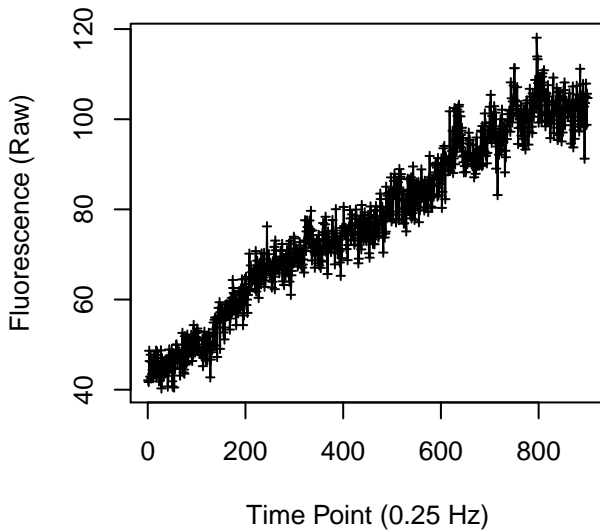

**Cell 1197**

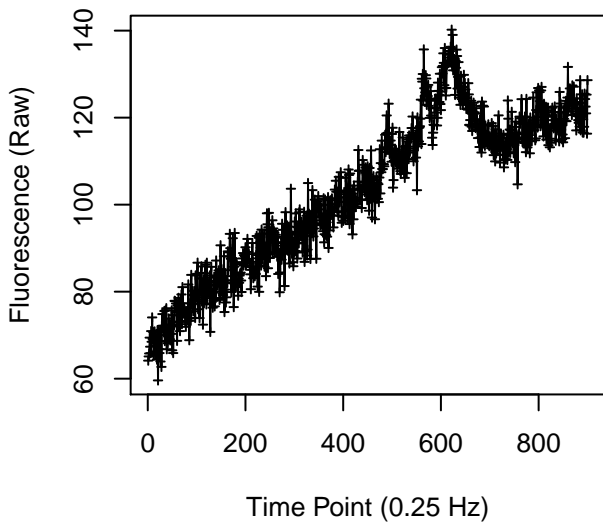

**Cell 1198**

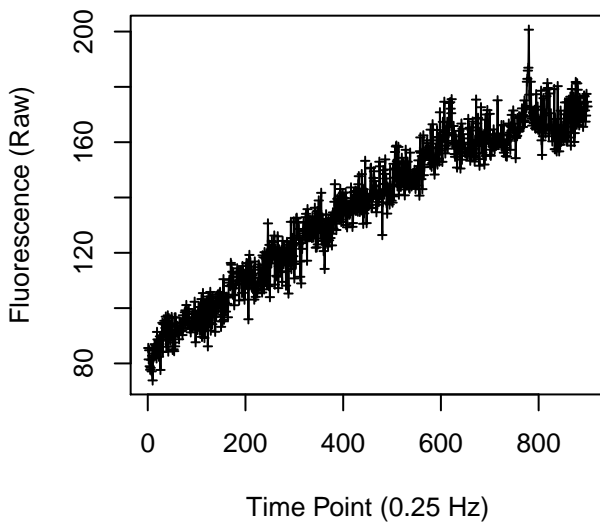

**Cell 1199**

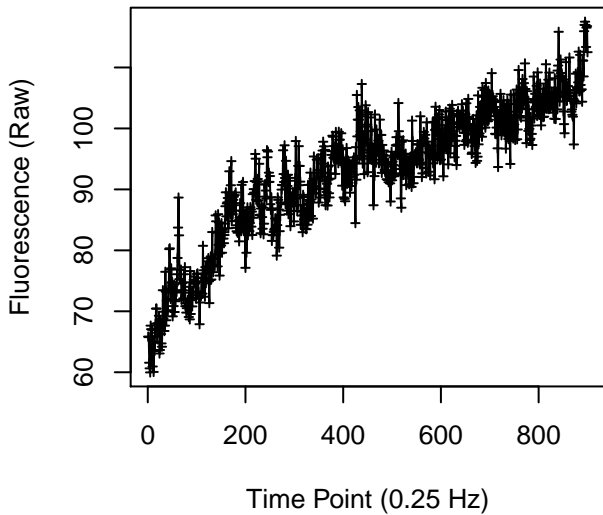

**Cell 1200**

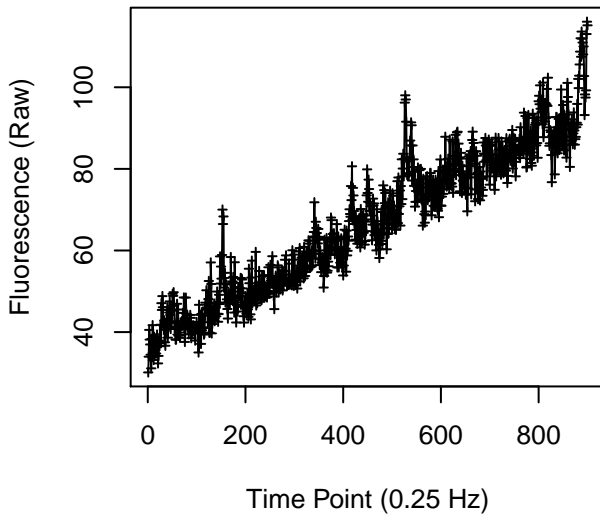

**Cell 1201**

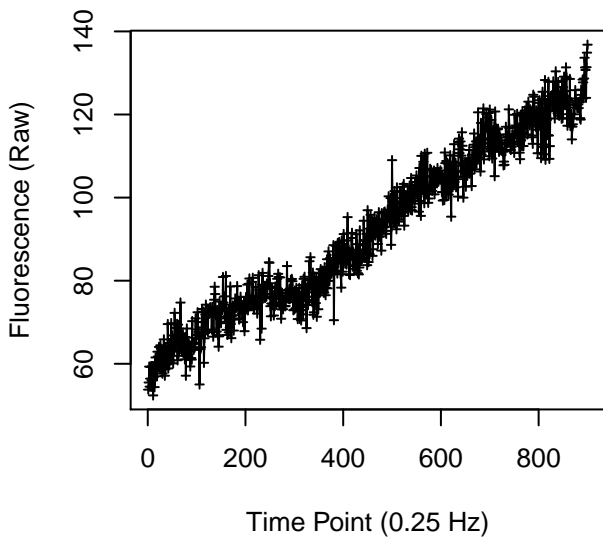

**Cell 1202**

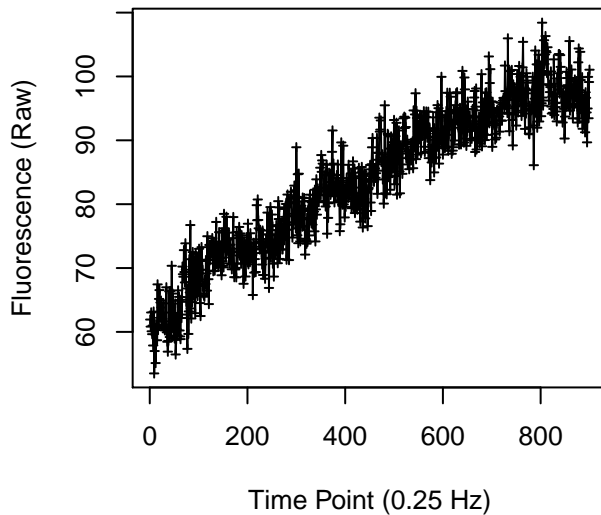

**Cell 1203**

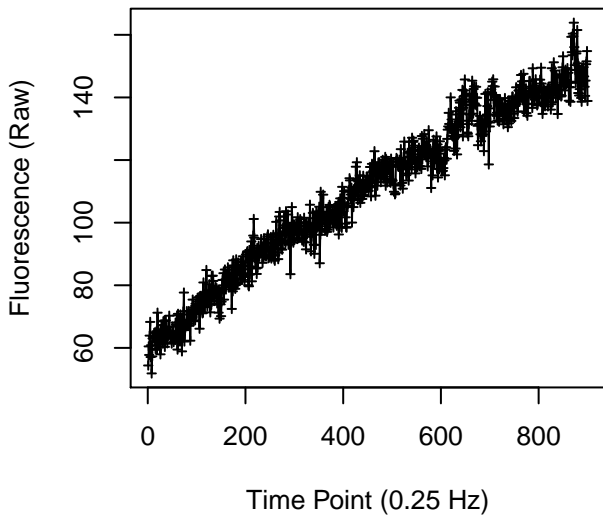

**Cell 1204**

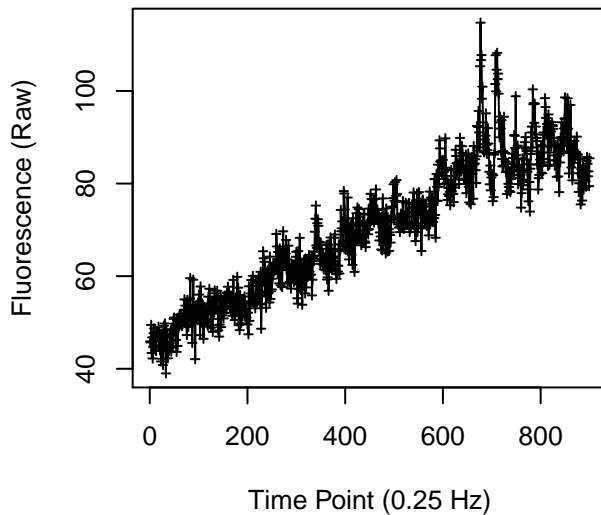

**Cell 1205**

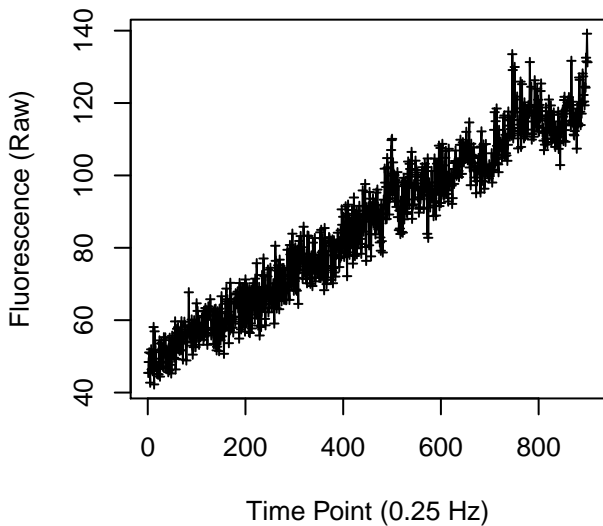

**Cell 1206**

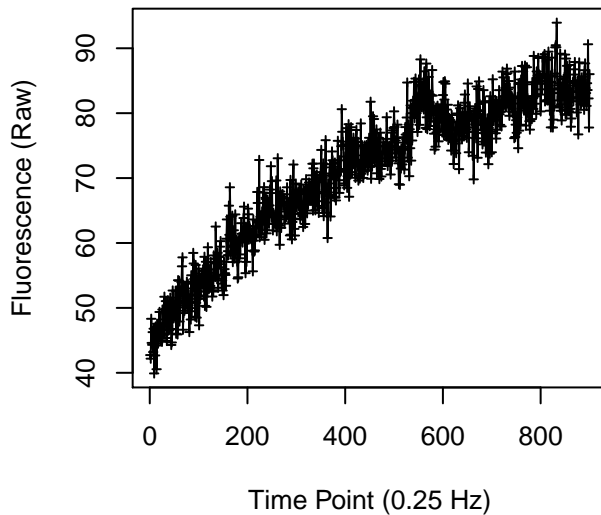

**Cell 1207**

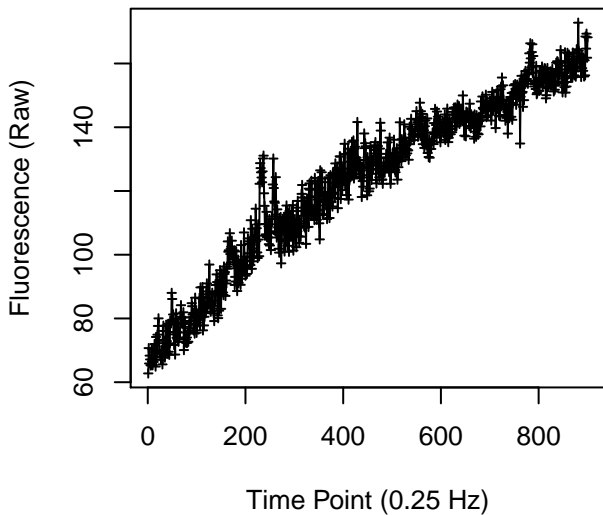

**Cell 1208**

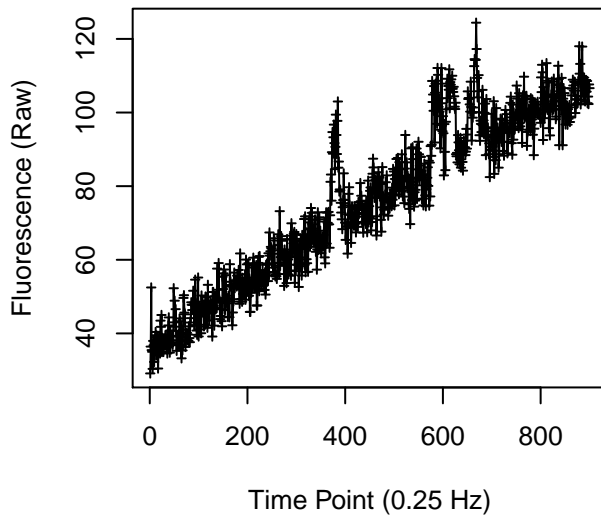

**Cell 1209**

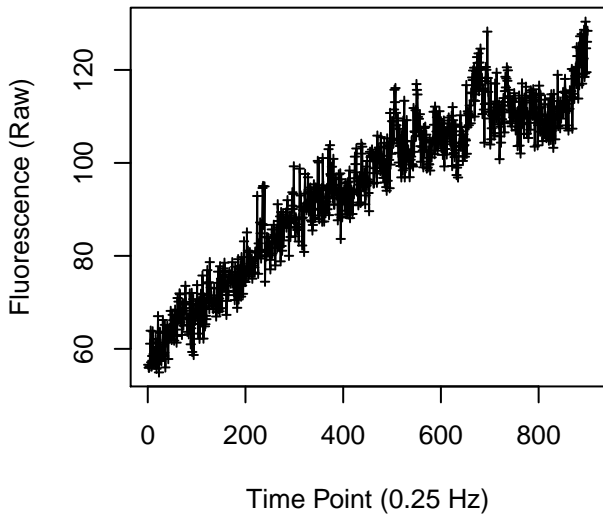

**Cell 1210**

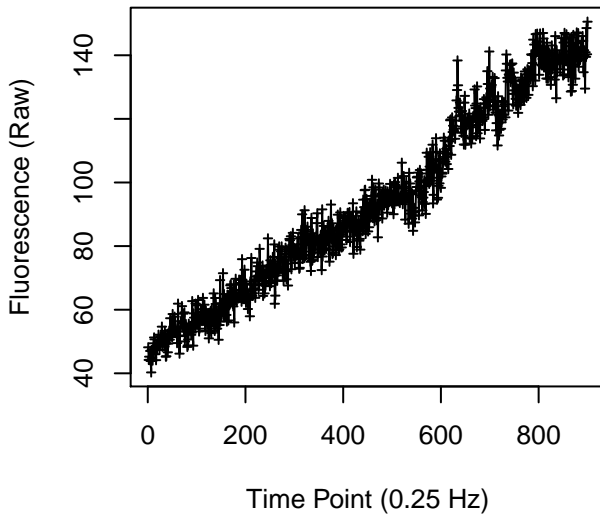

**Cell 1211**

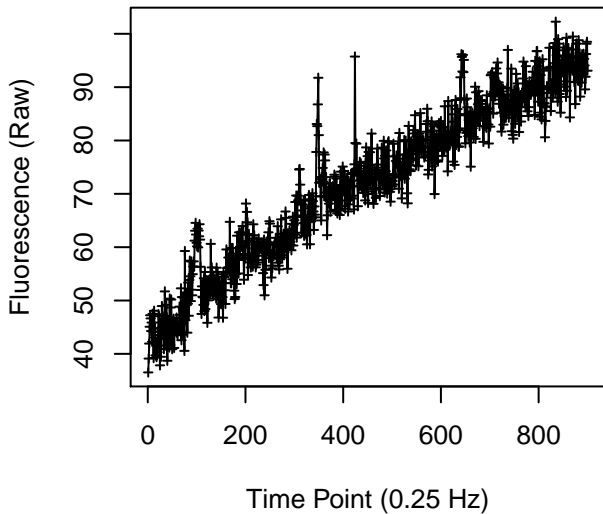

**Cell 1212**

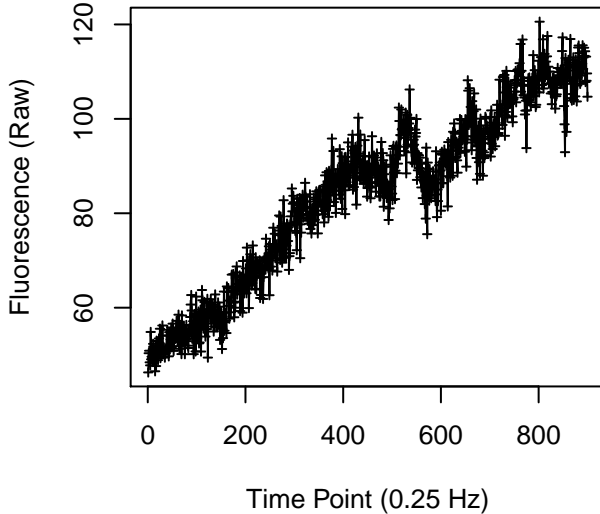

**Cell 1213**

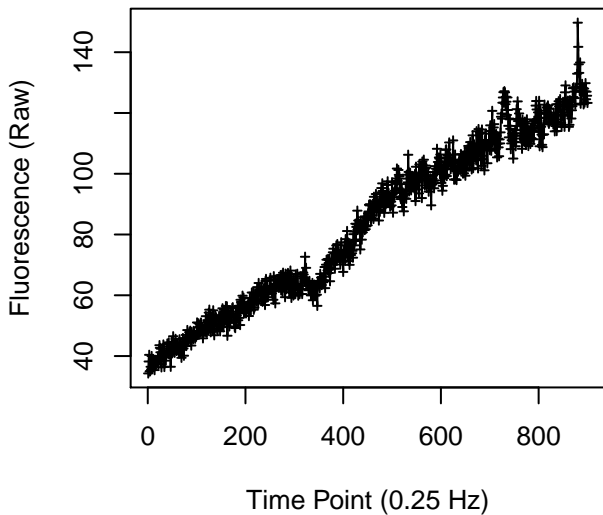

**Cell 1214**

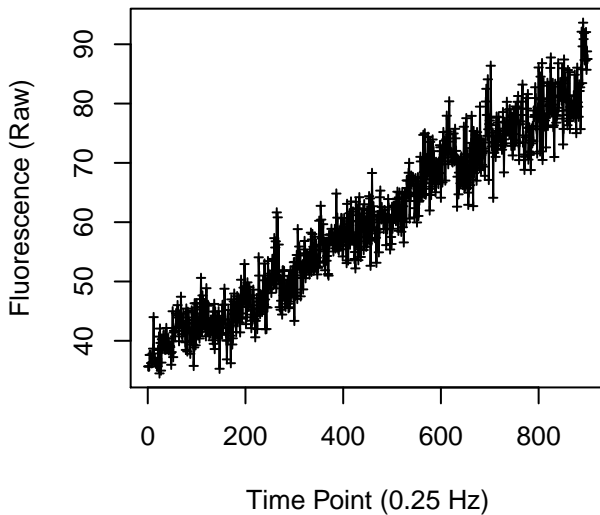

**Cell 1215**

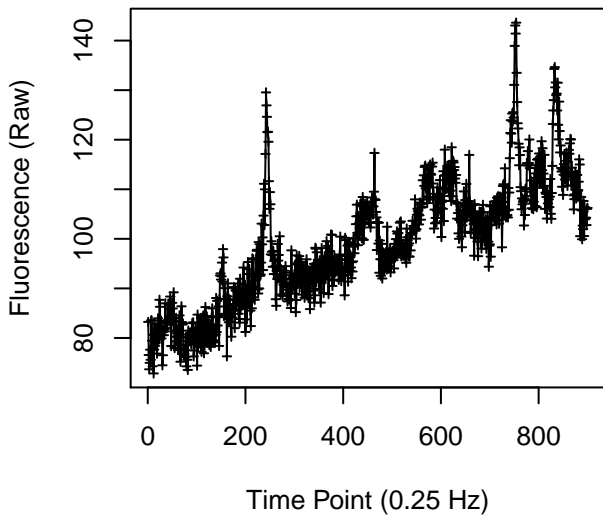

**Cell 1216**

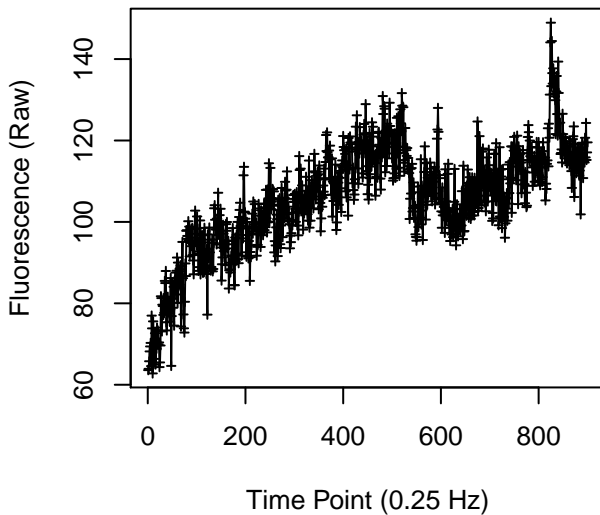

**Cell 1217**

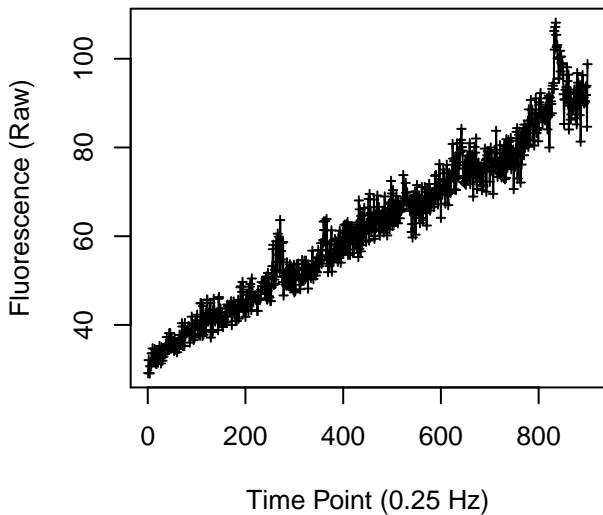

**Cell 1218**

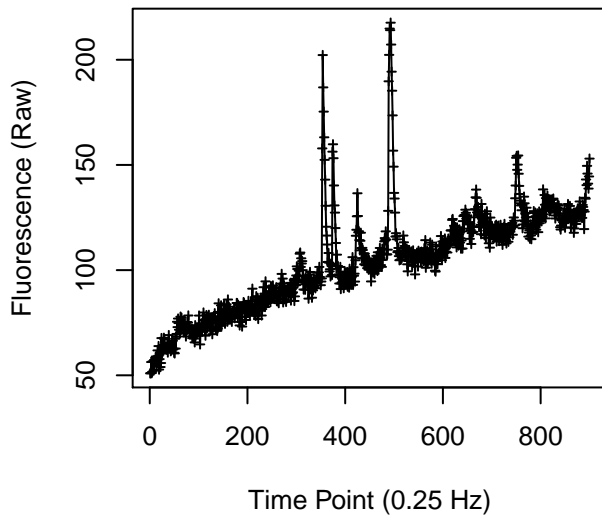

**Cell 1219**

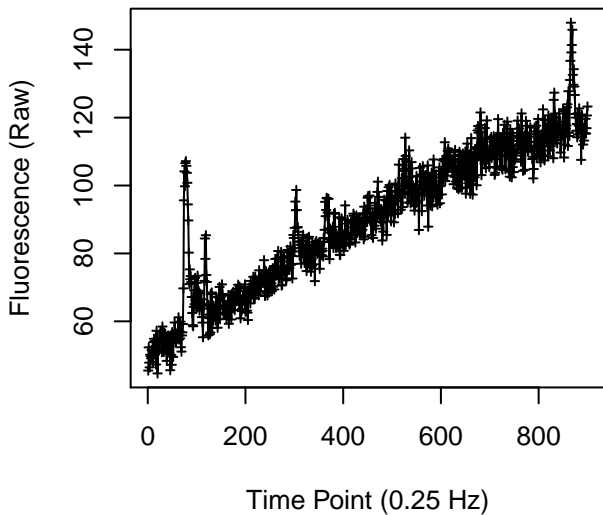

**Cell 1220**

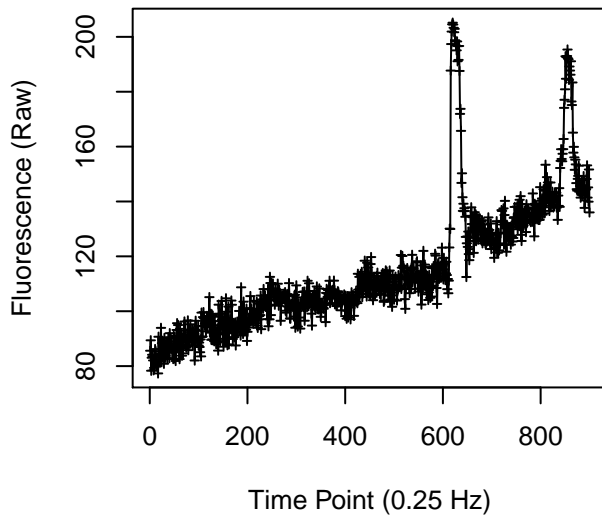

**Cell 1221**

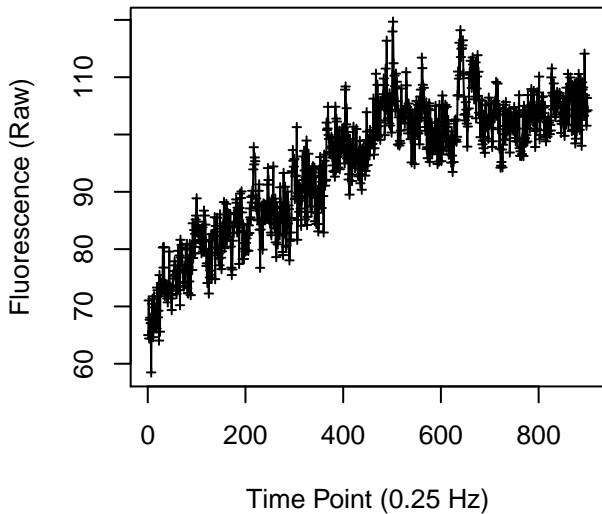

**Cell 1222**

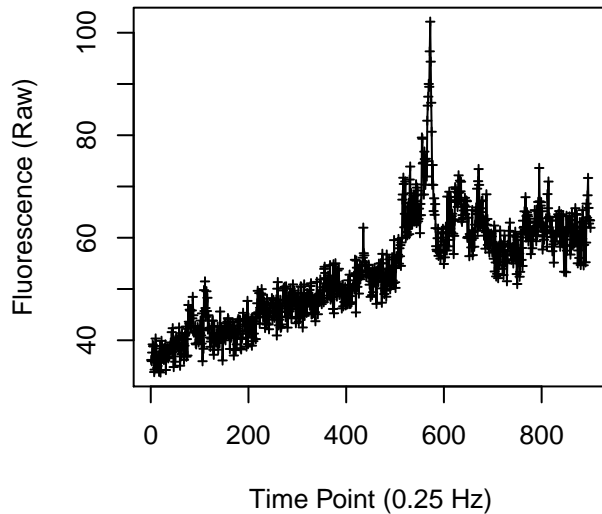

**Cell 1223**

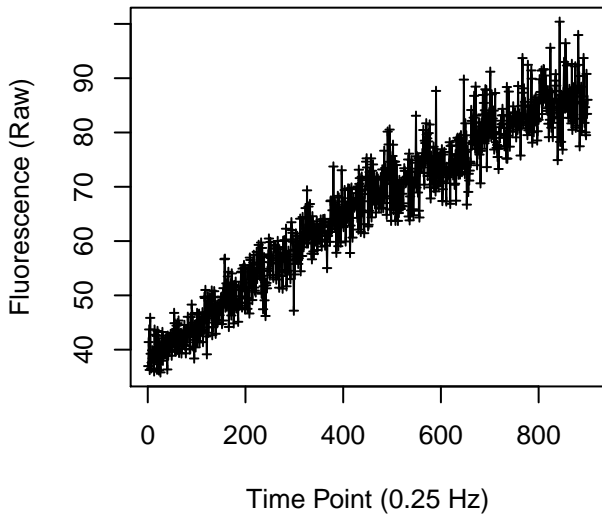

**Cell 1224**

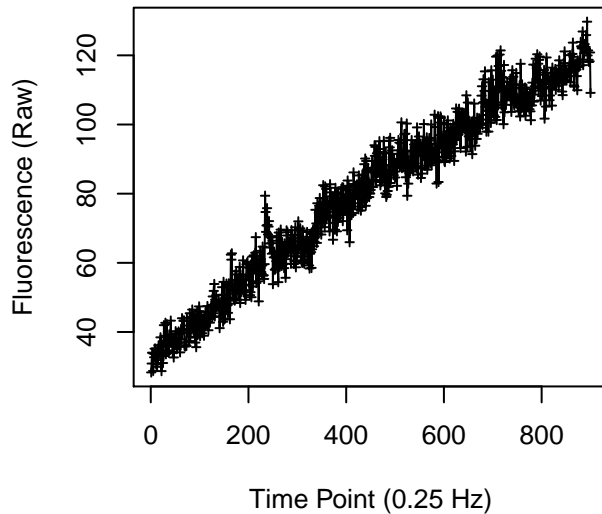



**Cell 1225**

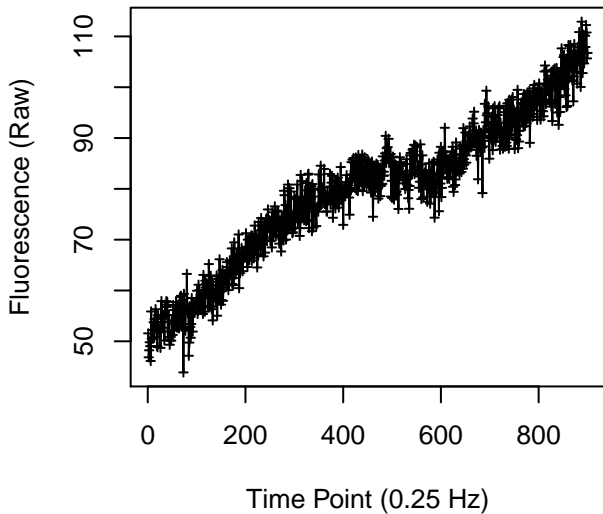

**Cell 1226**

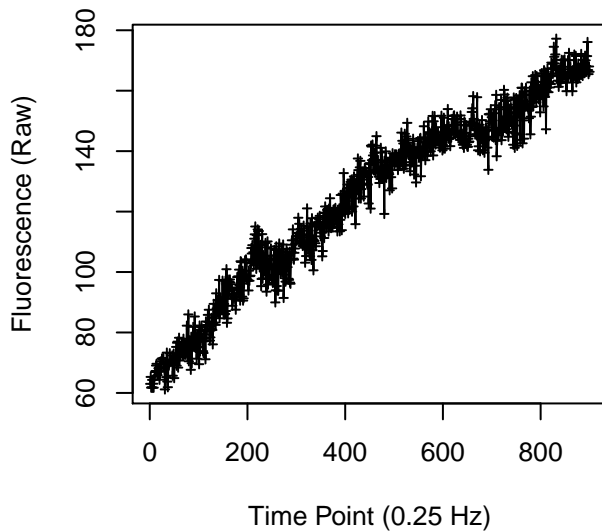

**Cell 1227**

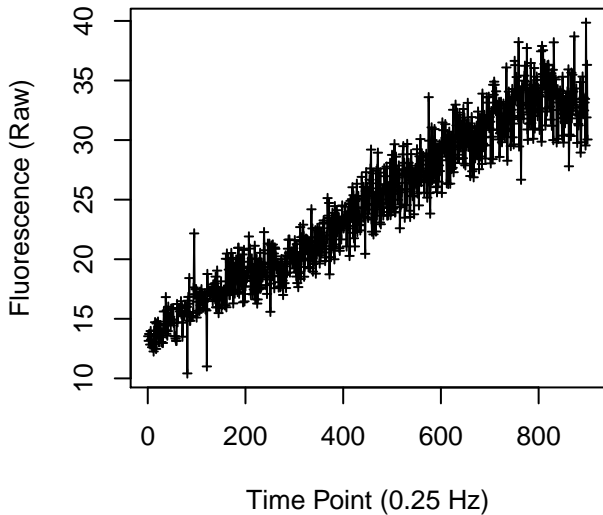

**Cell 1228**

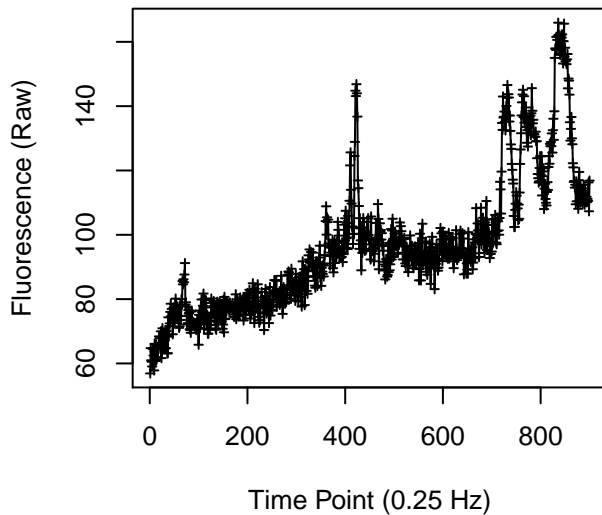

**Cell 1229**

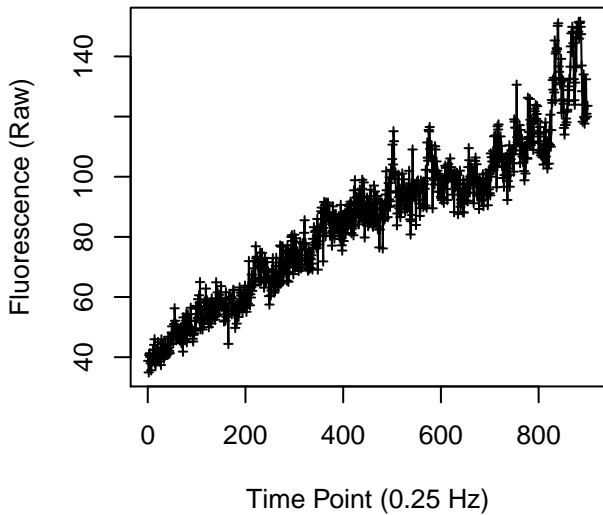

**Cell 1230**

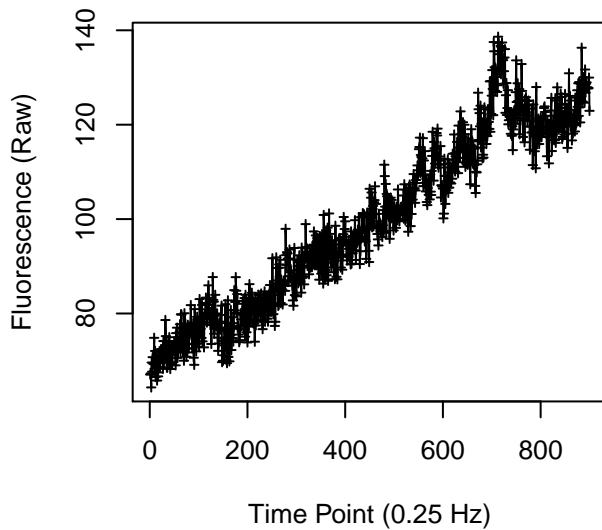

**Cell 1231**

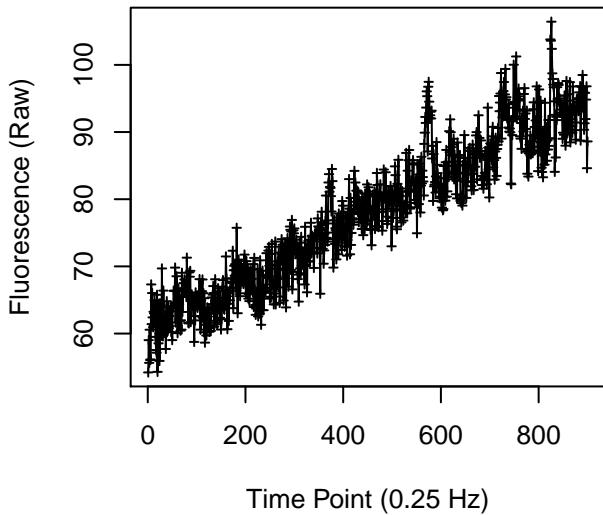

**Cell 1232**

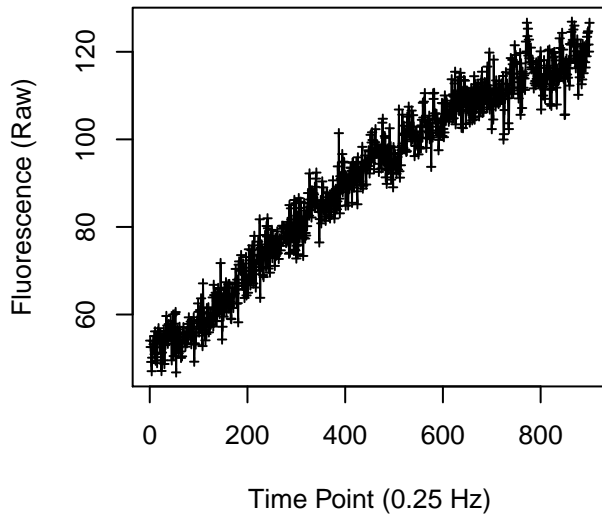

**Cell 1233**

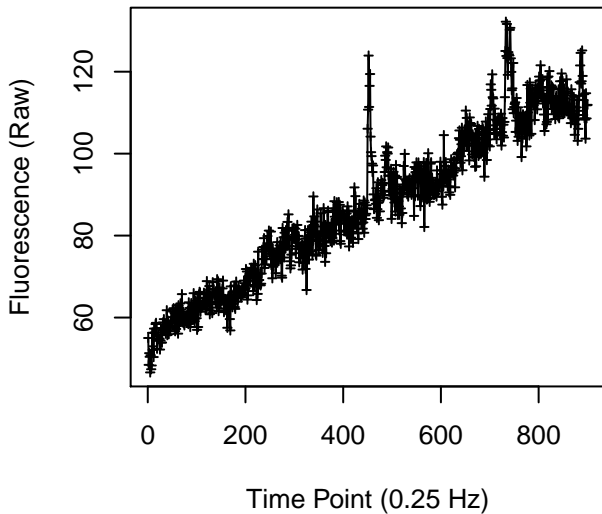

**Cell 1234**

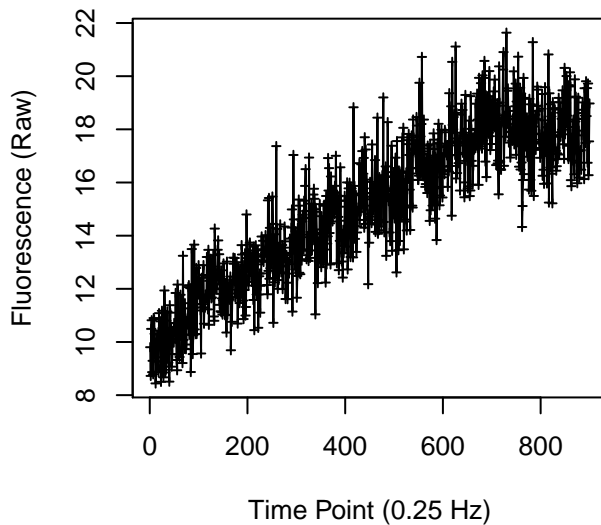

**Cell 1235**

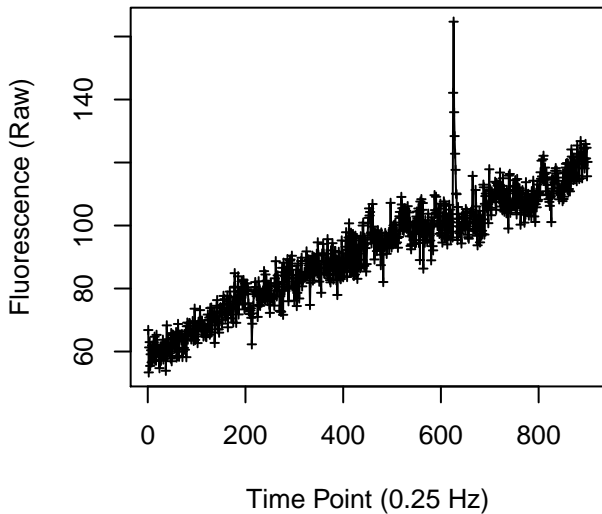

**Cell 1236**

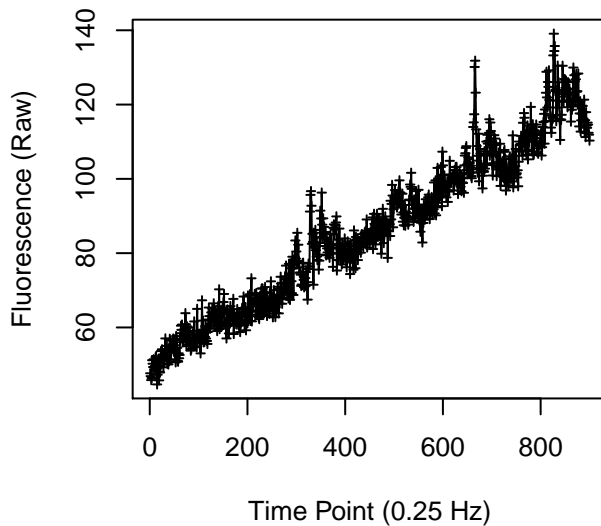

**Cell 1237**

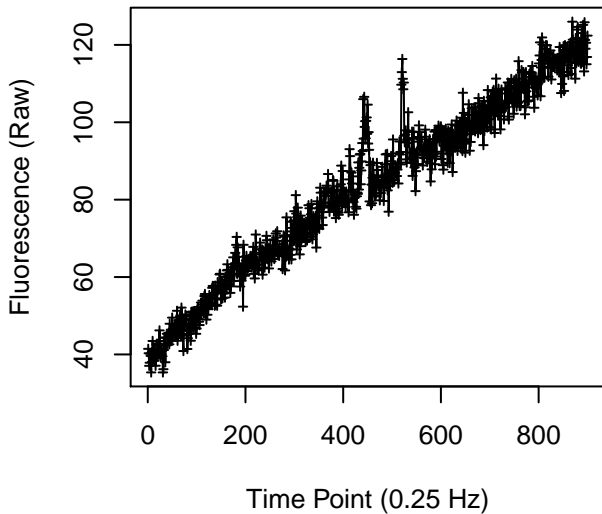

**Cell 1238**

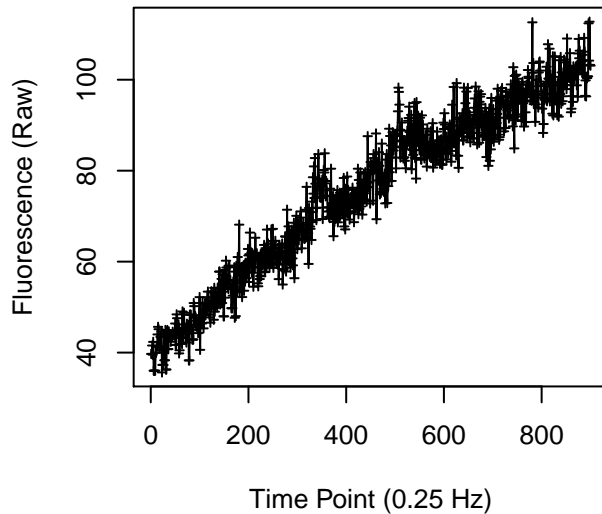

**Cell 1239**

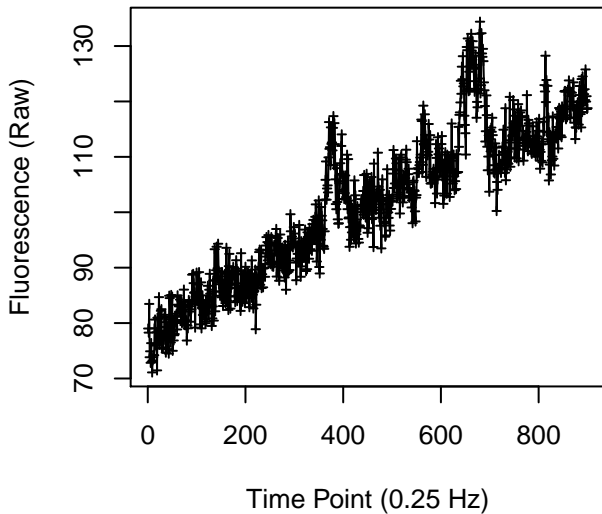

**Cell 1240**

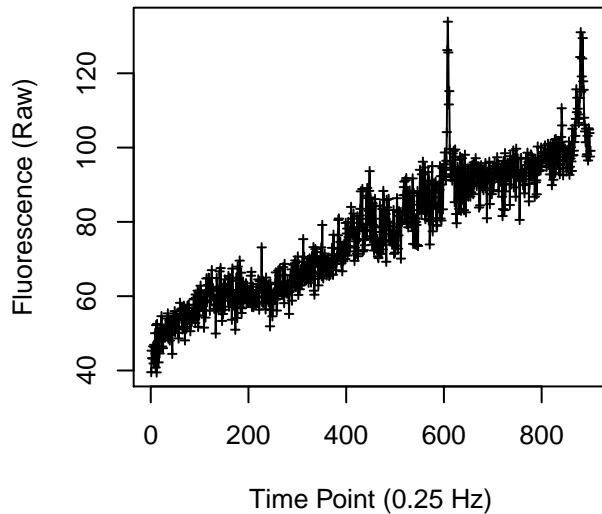

**Cell 1241**

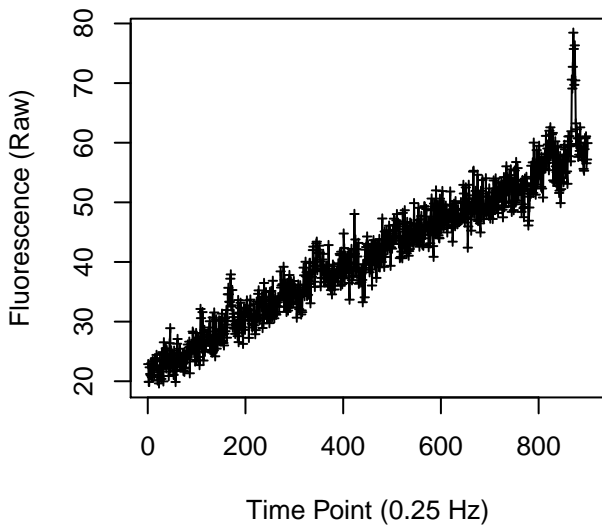

**Cell 1242**

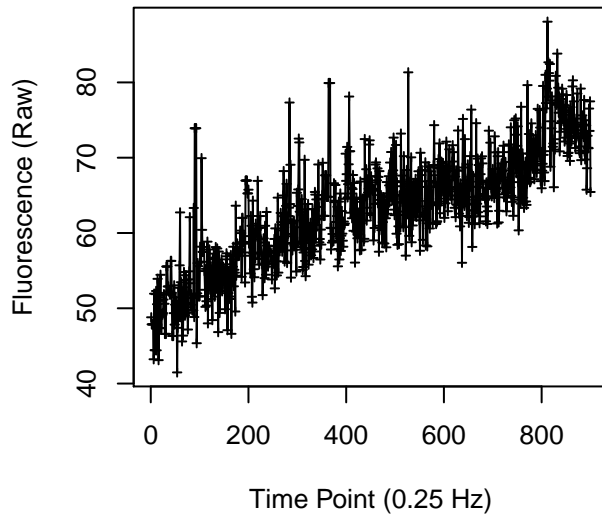

**Cell 1243**

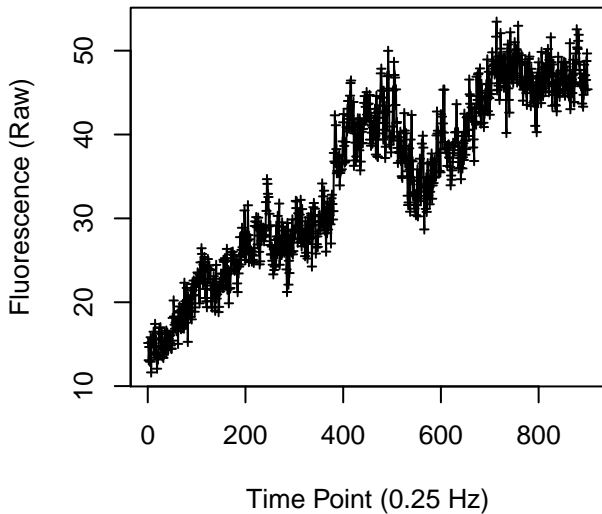

**Cell 1244**

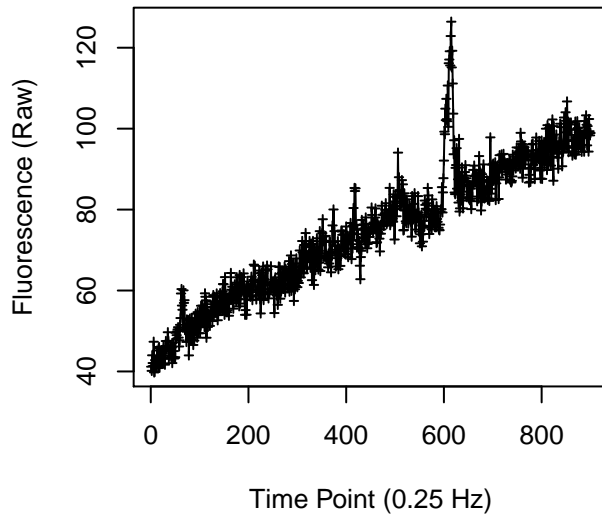

**Cell 1245**

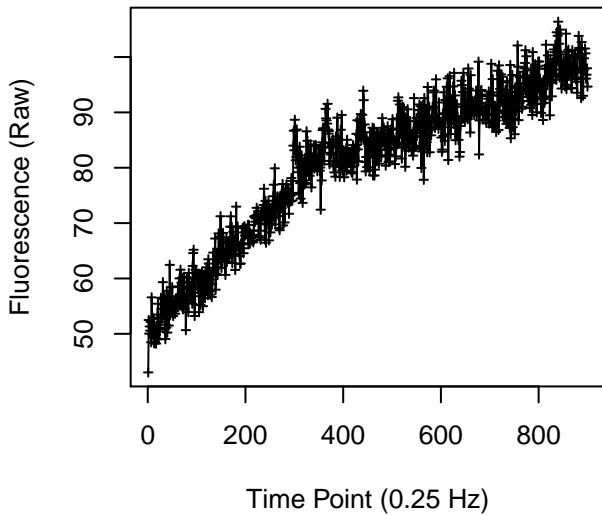

**Cell 1246**

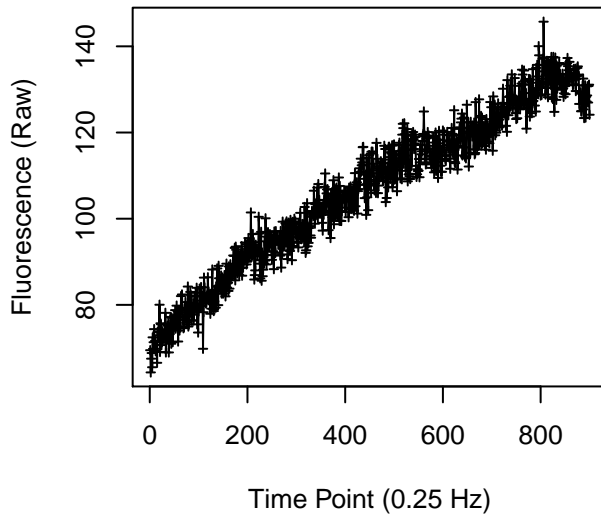

**Cell 1247**

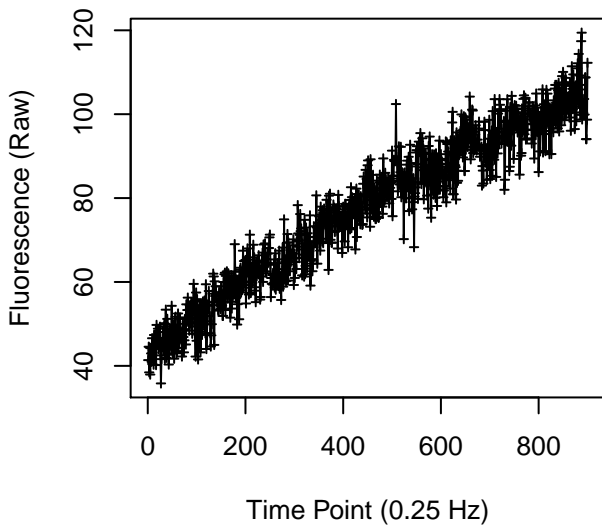

**Cell 1248**

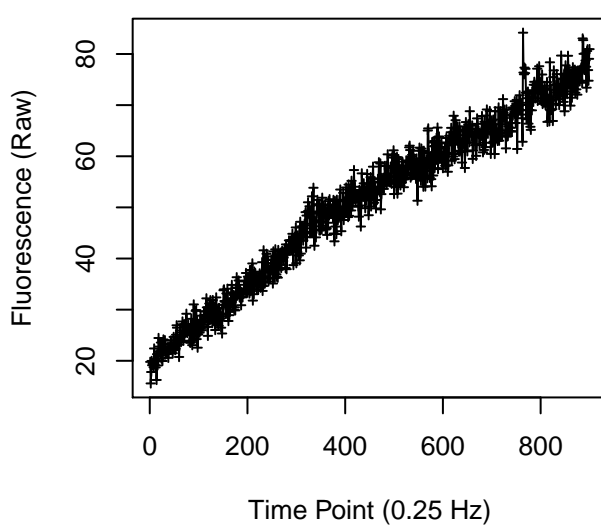

**Cell 1249**

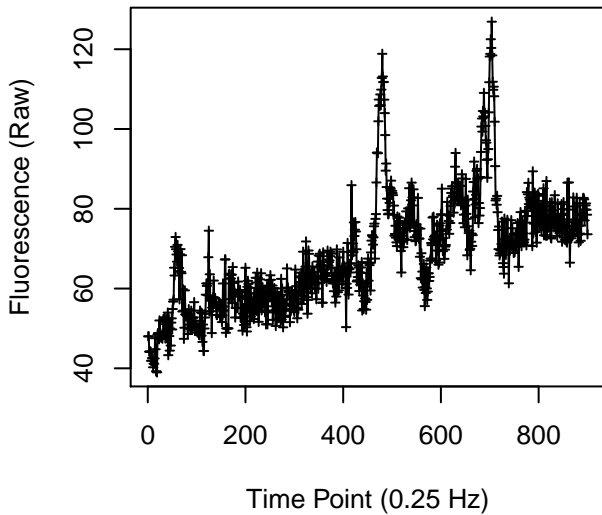

**Cell 1250**

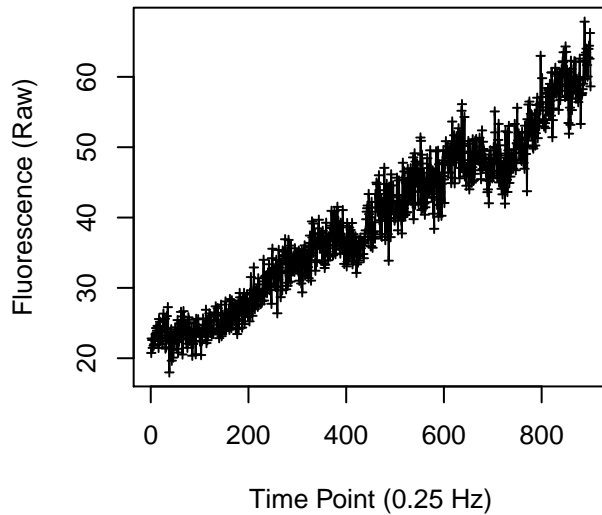

**Cell 1251**

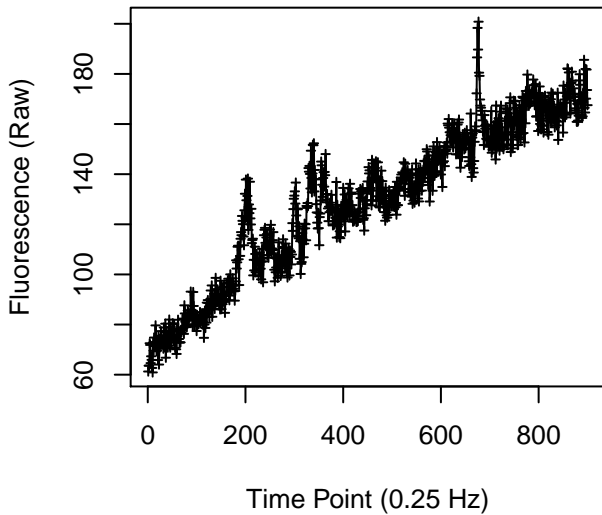

**Cell 1252**

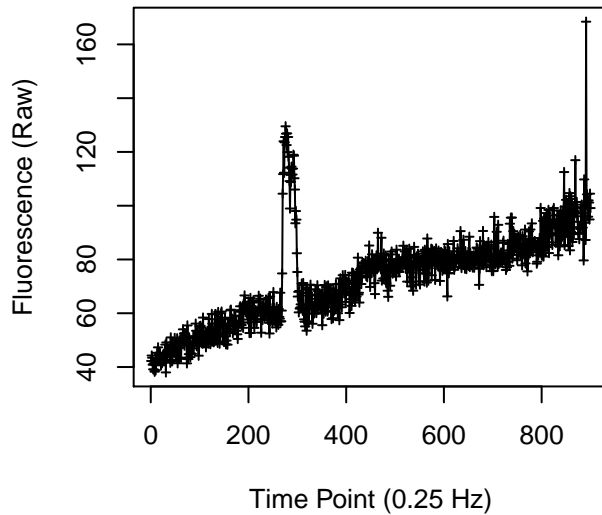

**Cell 1253**

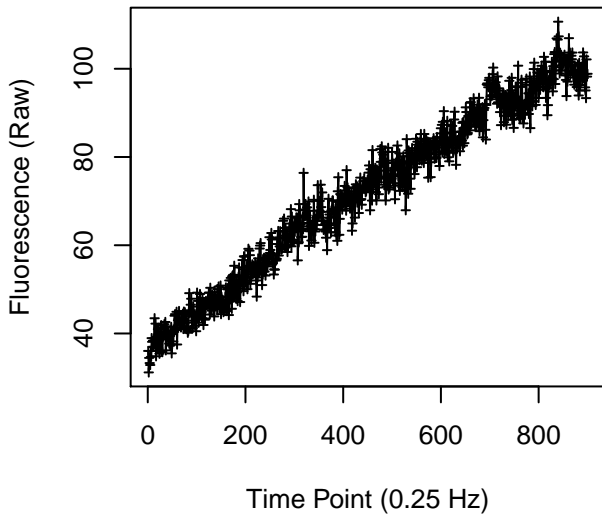

**Cell 1254**

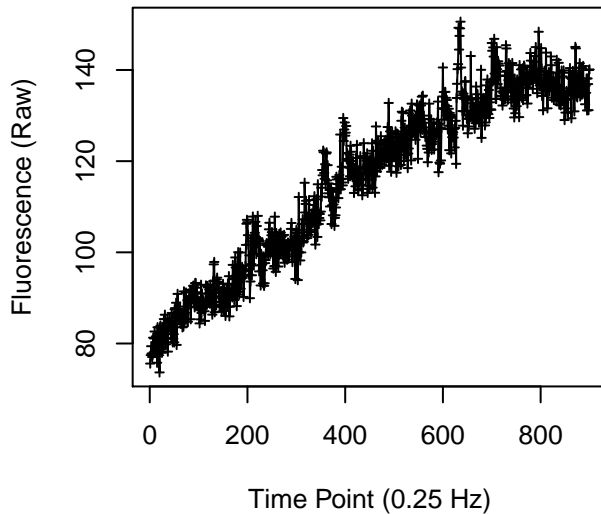

**Cell 1255**

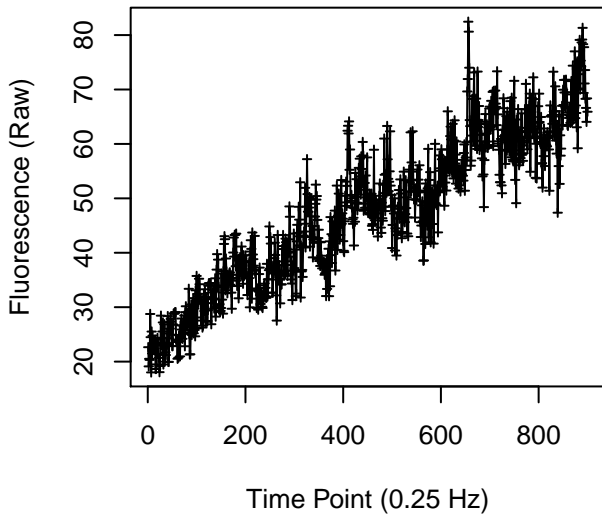

**Cell 1256**

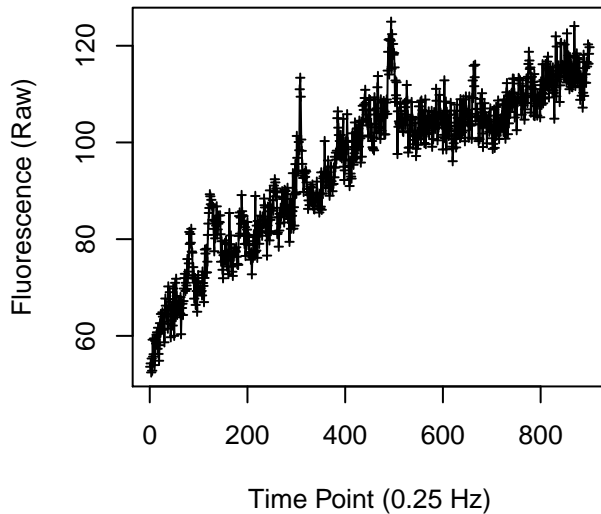



**Cell 1257**

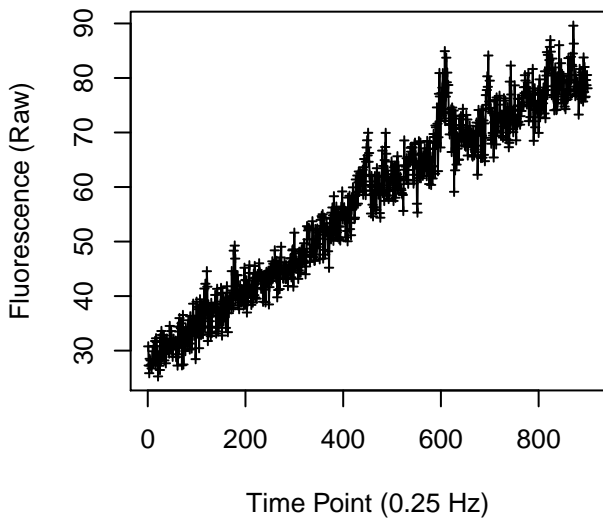

**Cell 1258**

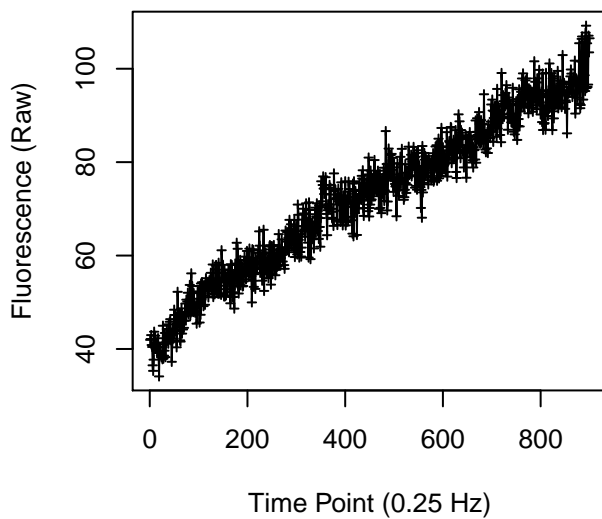

**Cell 1259**

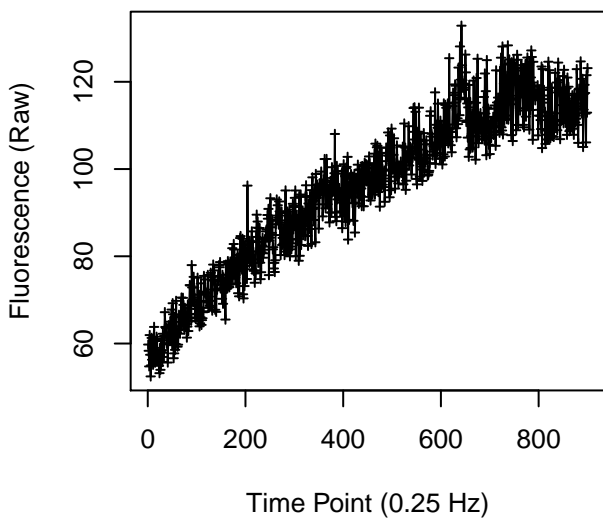

**Cell 1260**

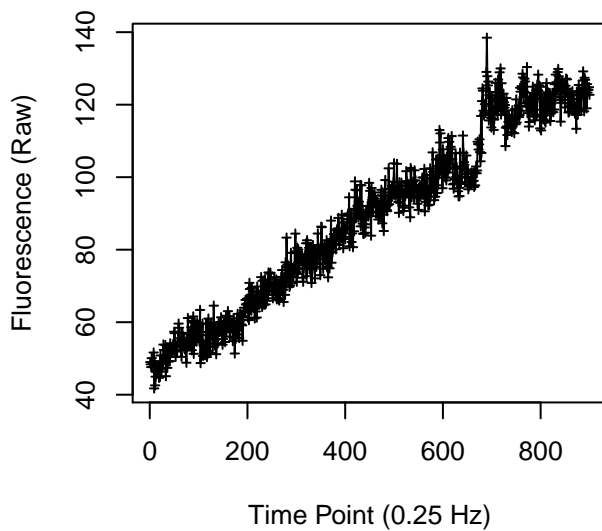

**Cell 1261**

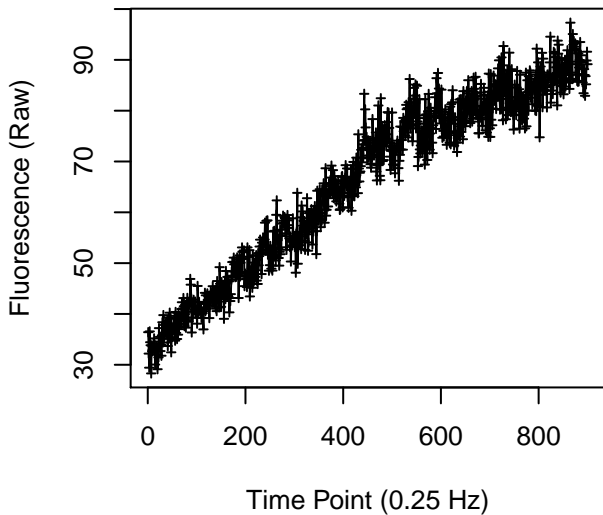

**Cell 1262**

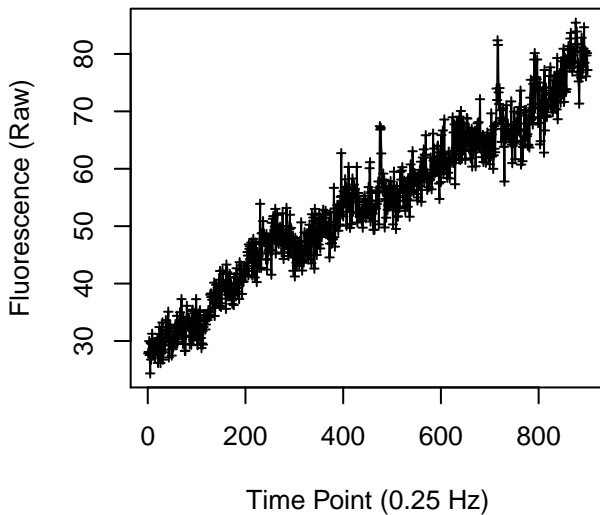

**Cell 1263**

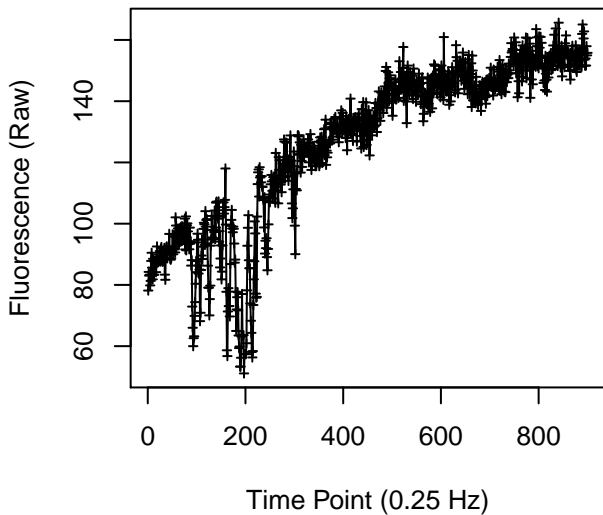

**Cell 1264**

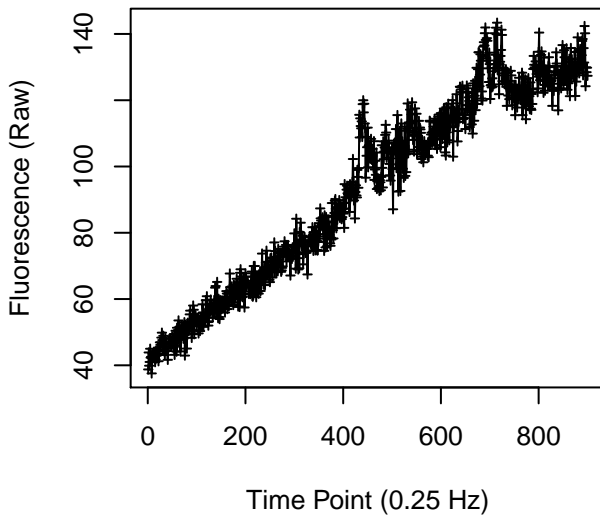

**Cell 1265**

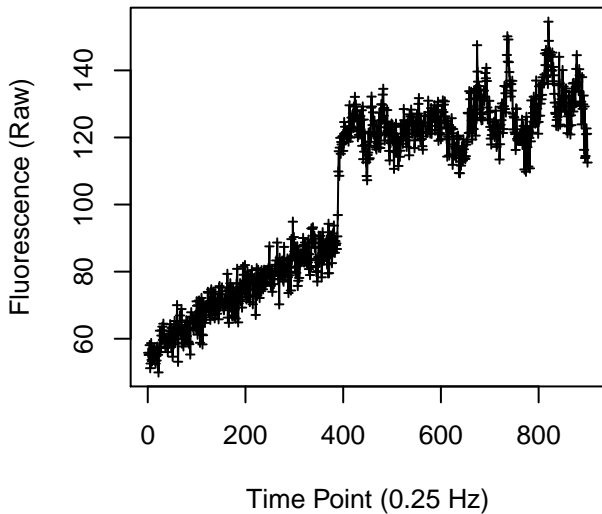

**Cell 1266**

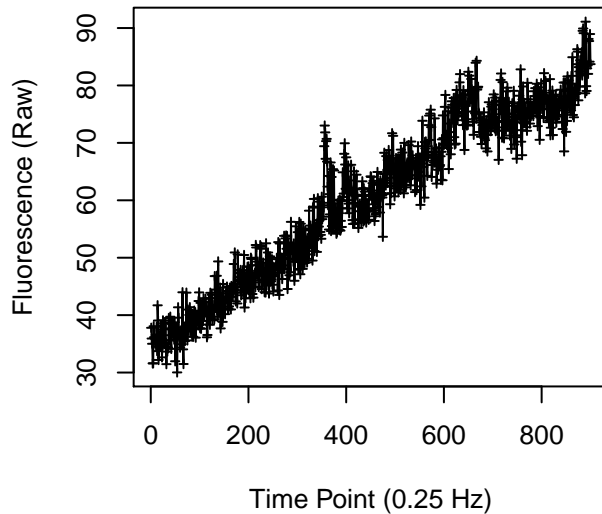

**Cell 1267**

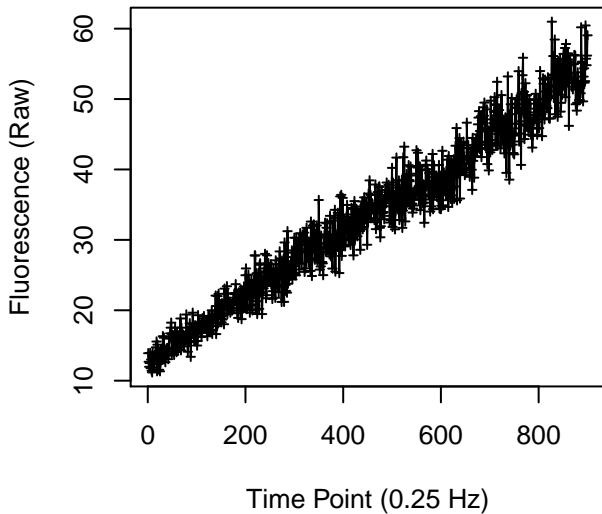

**Cell 1268**

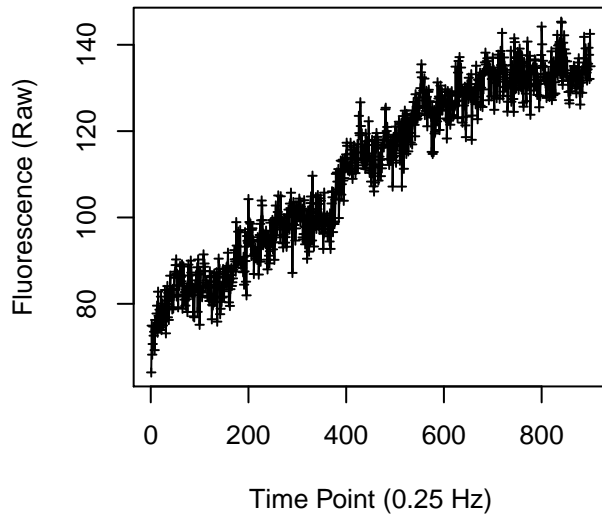

**Cell 1269**

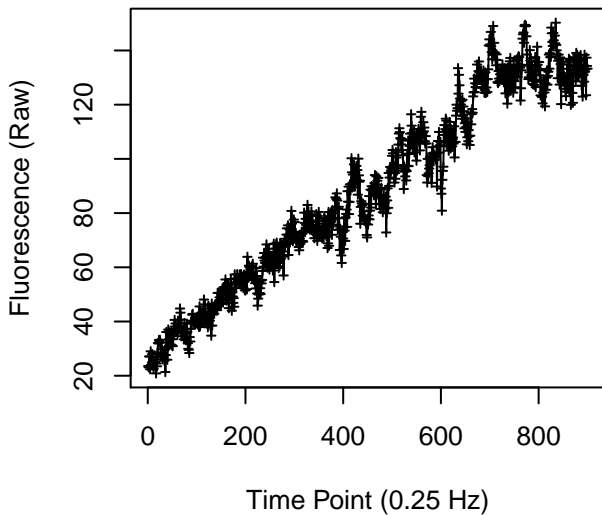

**Cell 1270**

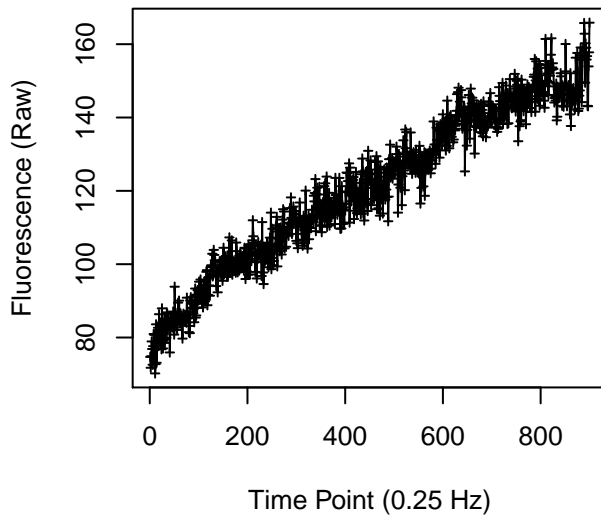

**Cell 1271**

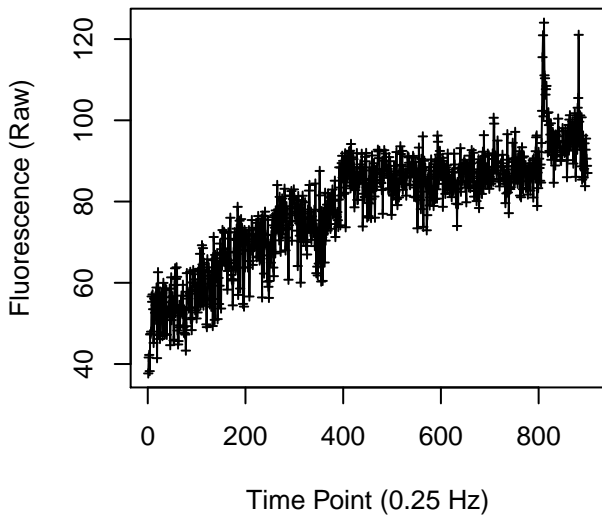

**Cell 1272**

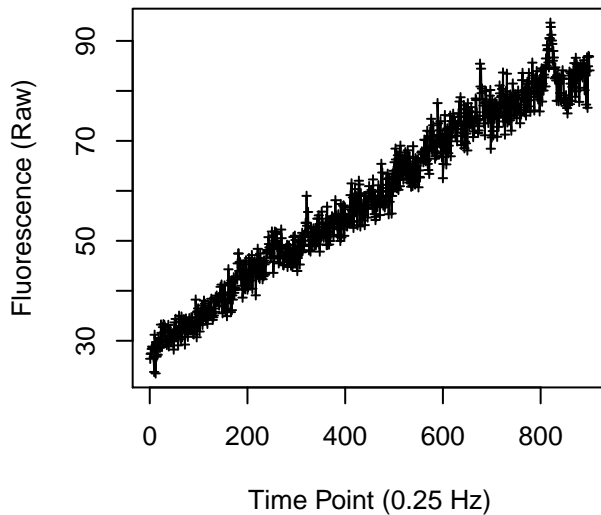

**Cell 1273**

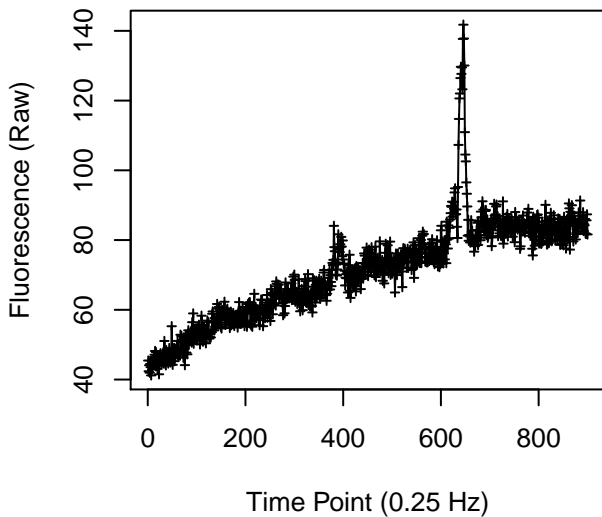

**Cell 1274**

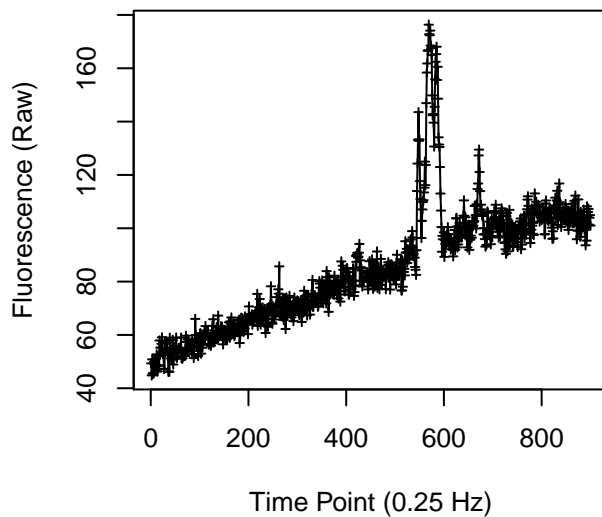

**Cell 1275**

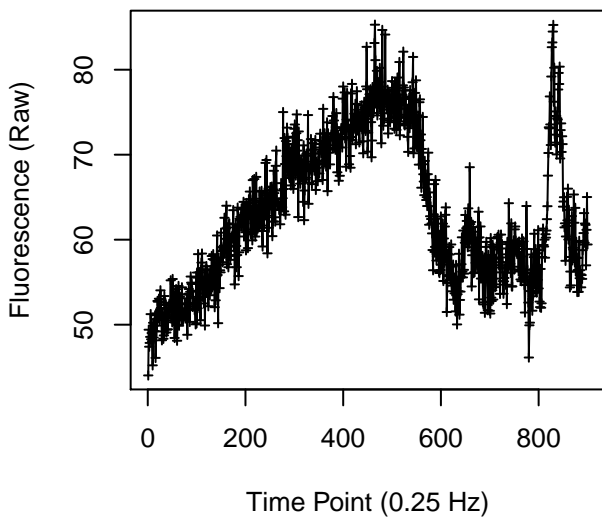

**Cell 1276**

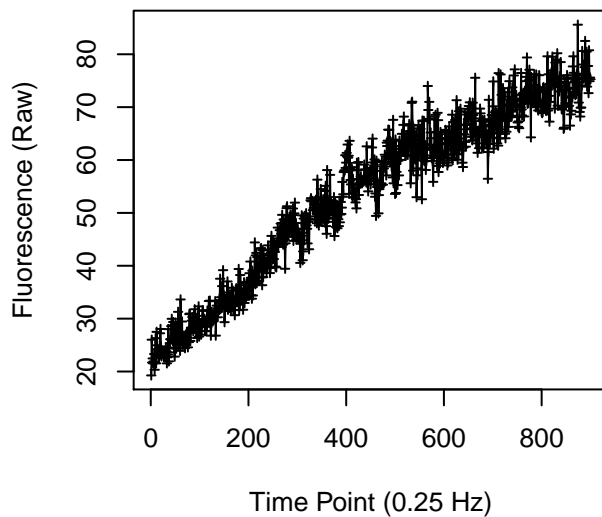

**Cell 1277**

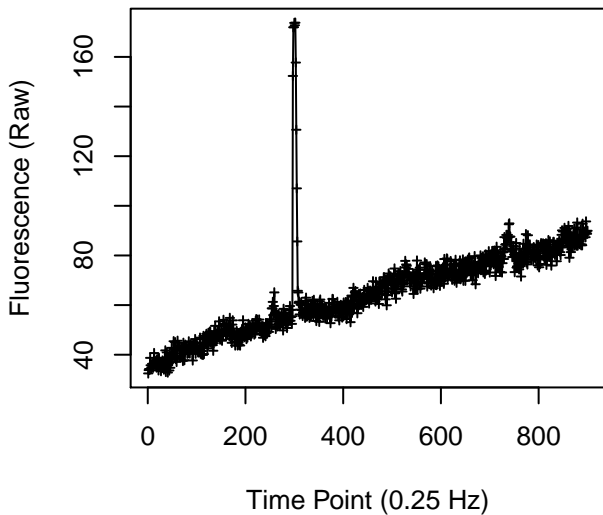

**Cell 1278**

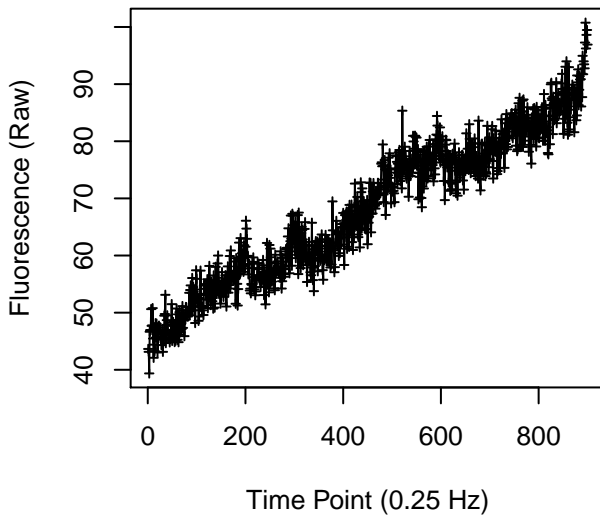

**Cell 1279**

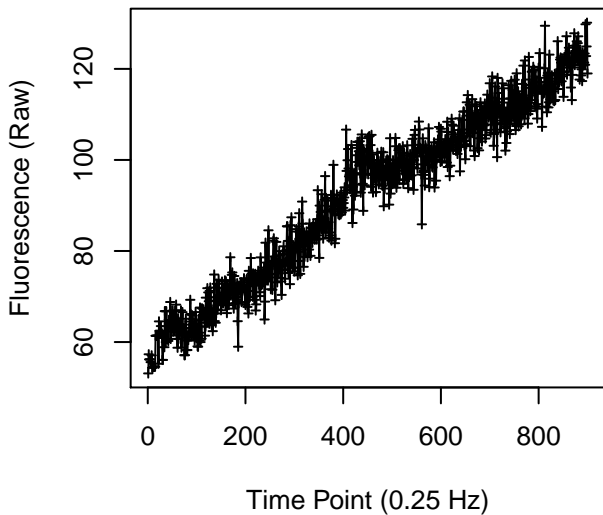

**Cell 1280**

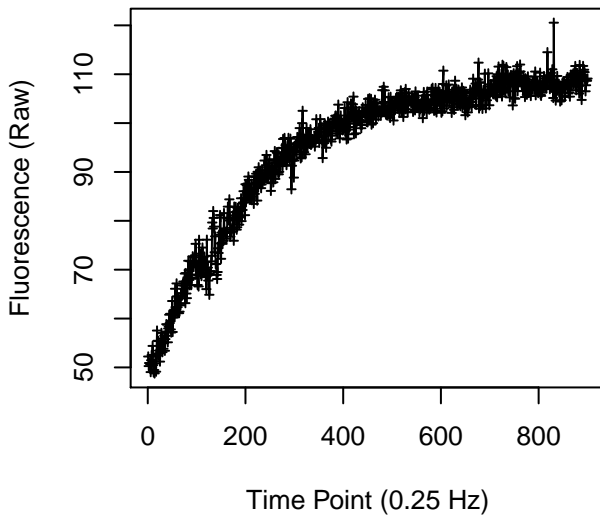

**Cell 1281**

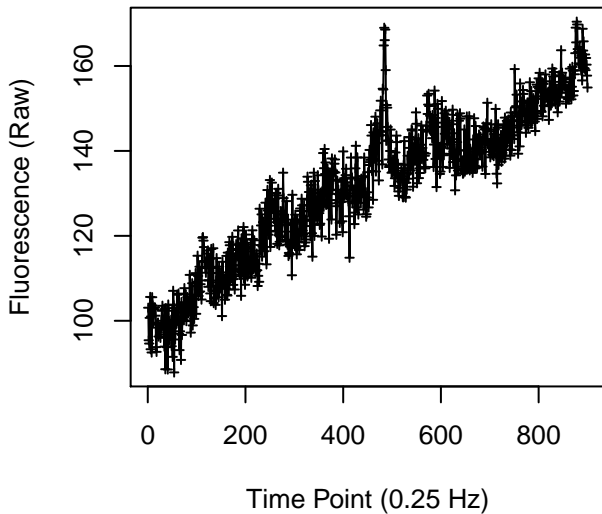

**Cell 1282**

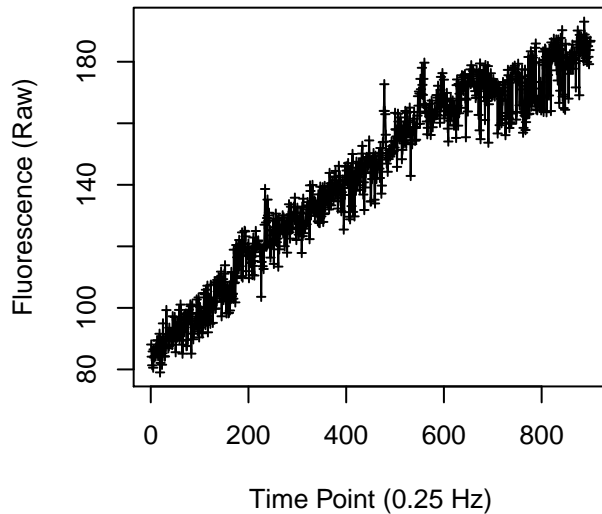

**Cell 1283**

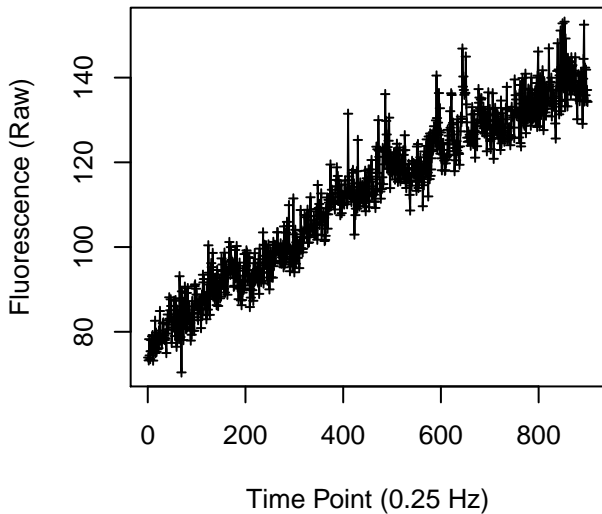

**Cell 1284**

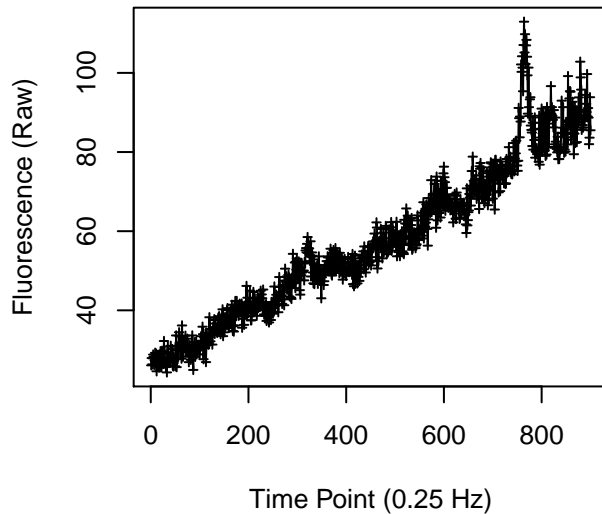

**Cell 1285**

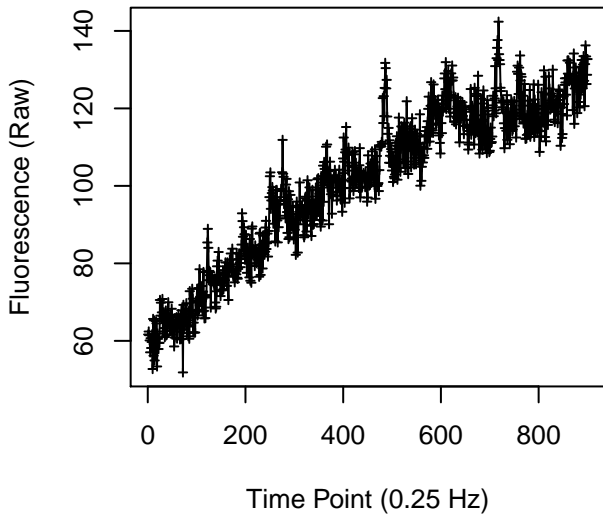

**Cell 1286**

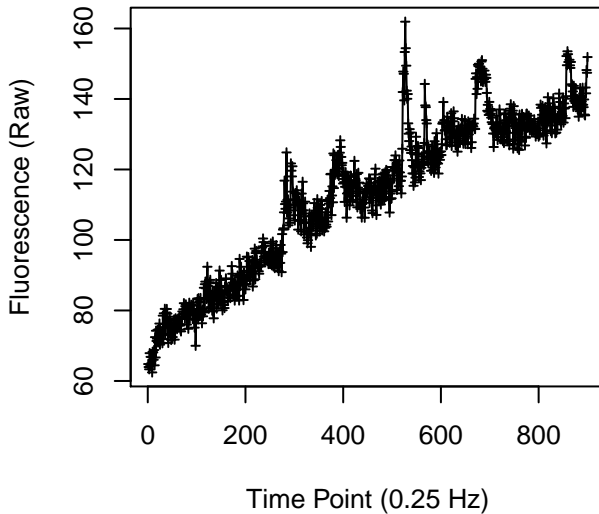

**Cell 1287**

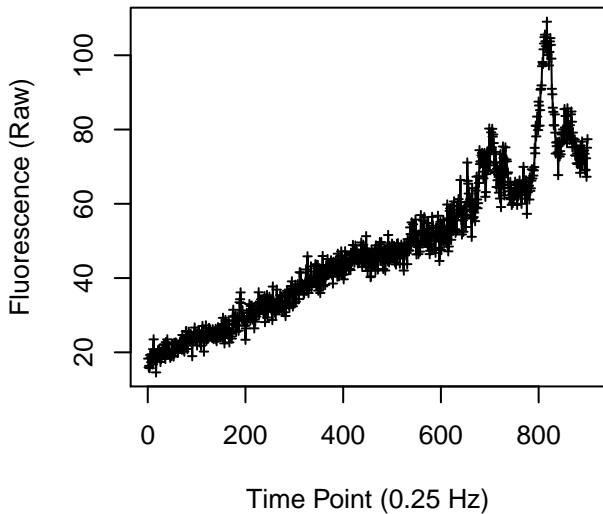

**Cell 1288**

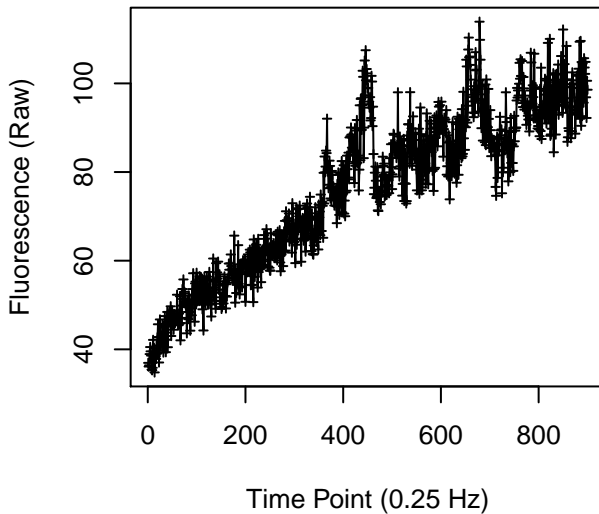



**Cell 1289**

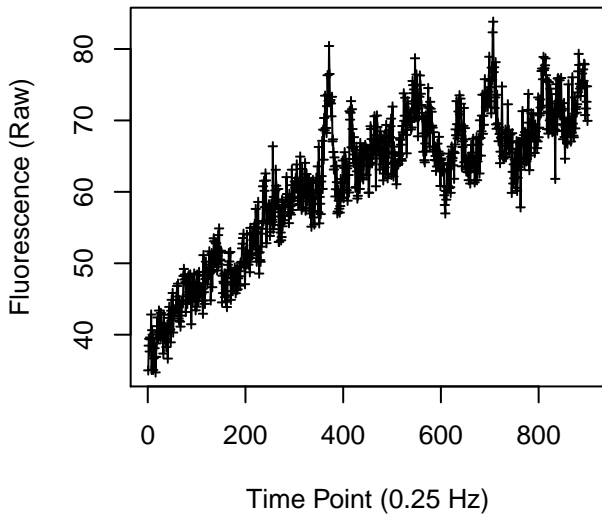

**Cell 1290**

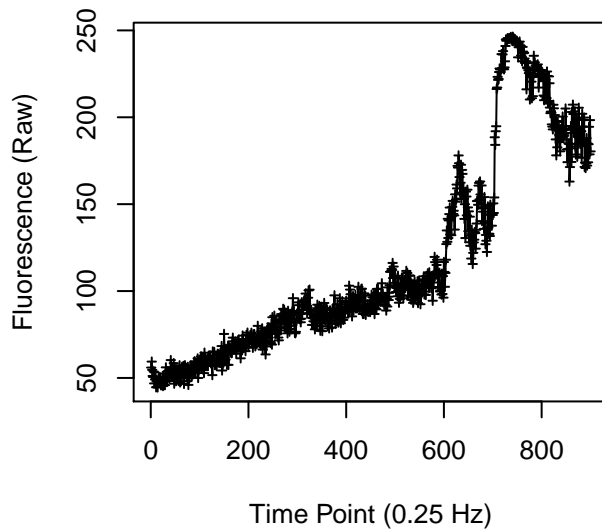

**Cell 1291**

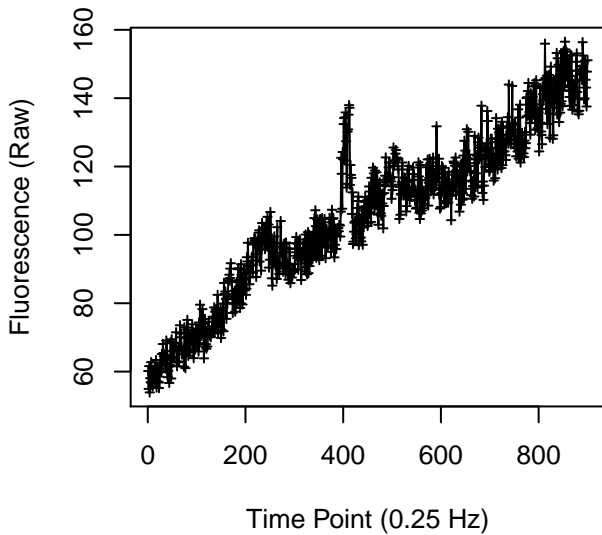

**Cell 1292**

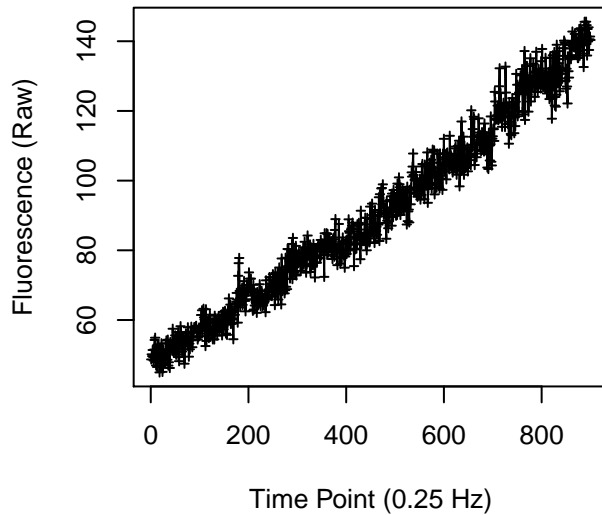

**Cell 1293**

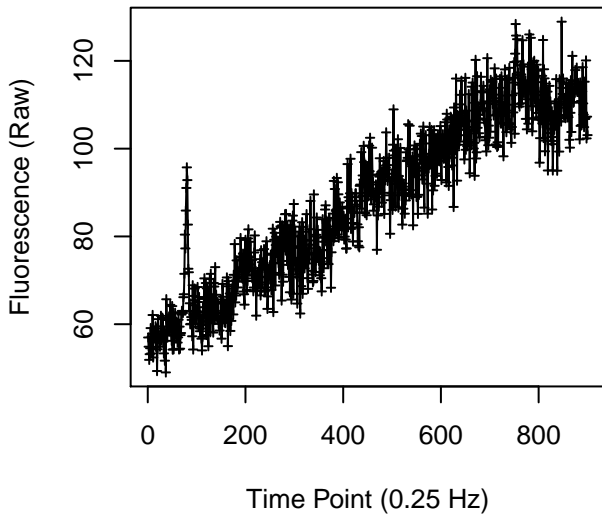

**Cell 1294**

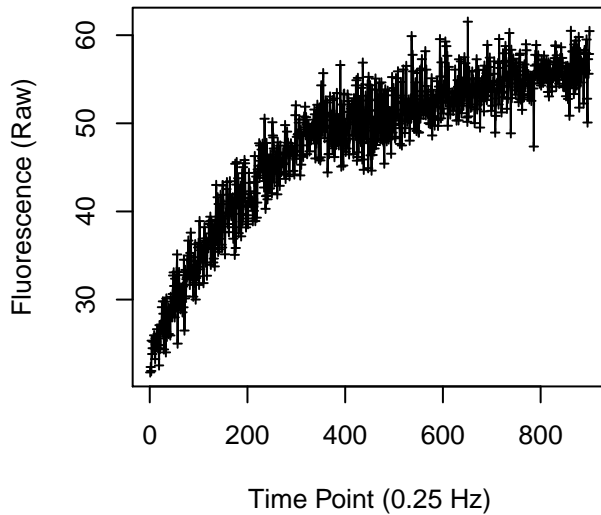

**Cell 1295**

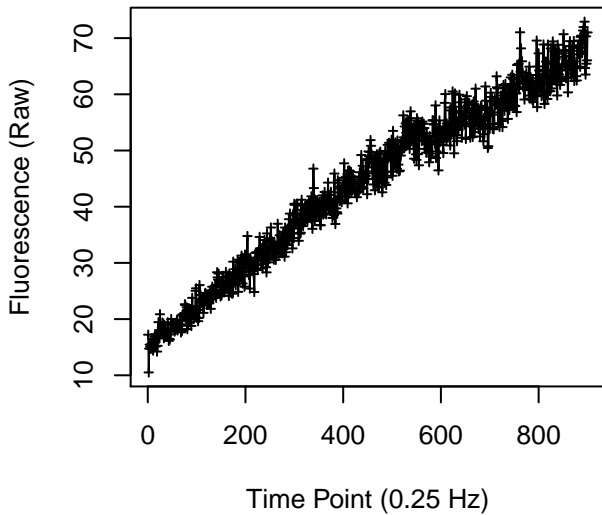

**Cell 1296**

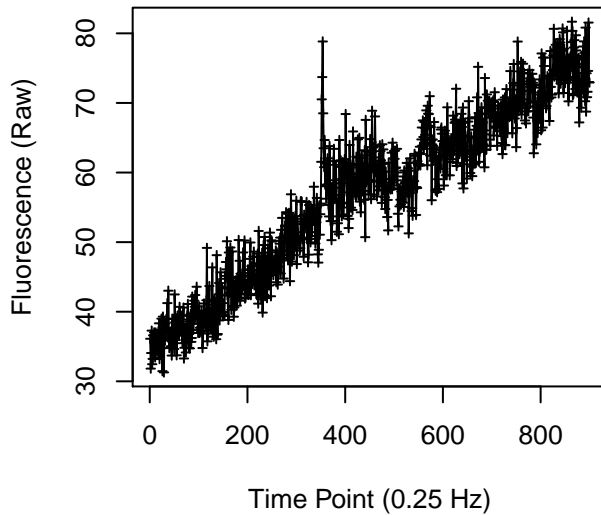

**Cell 1297**

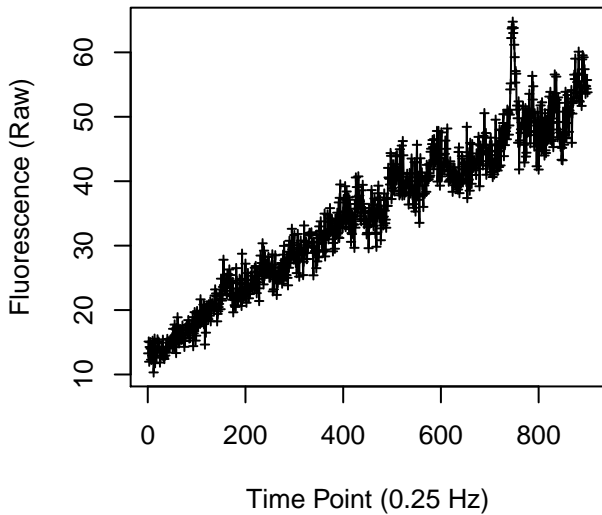

**Cell 1298**

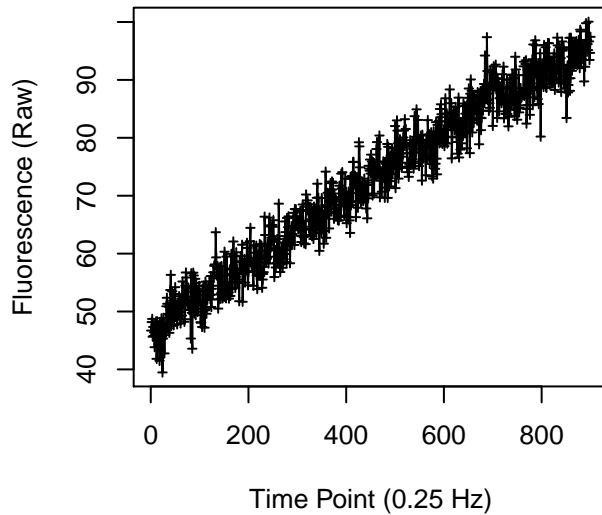

**Cell 1299**

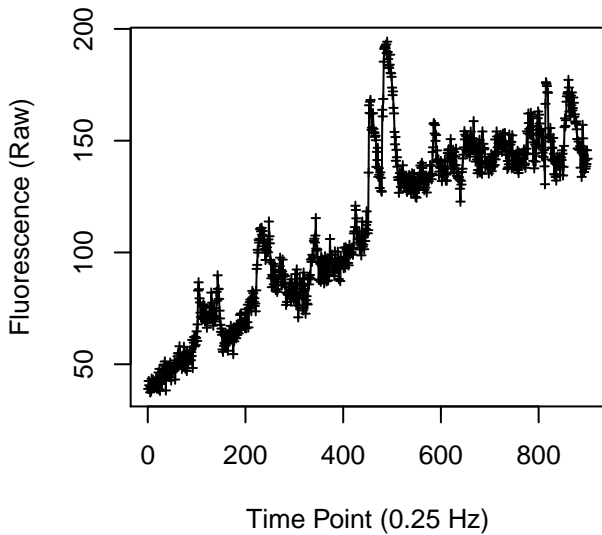

**Cell 1300**

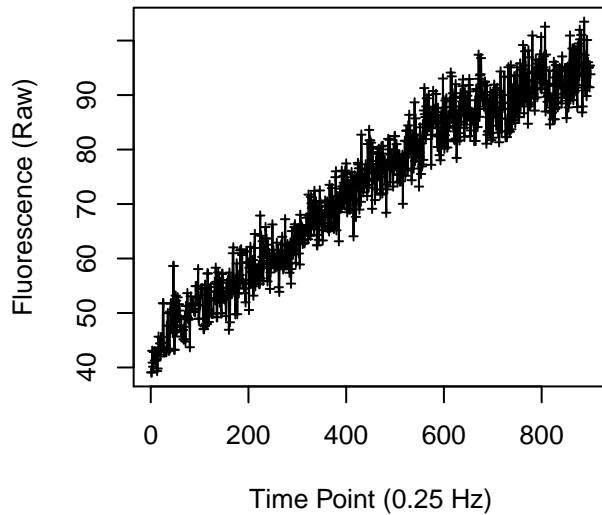

**Cell 1301**

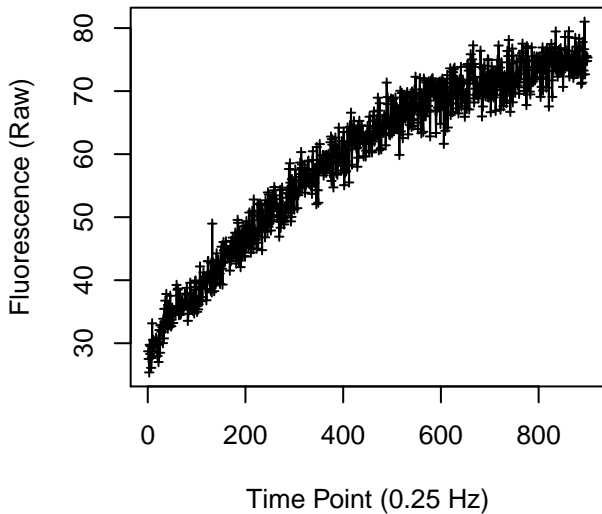

**Cell 1302**

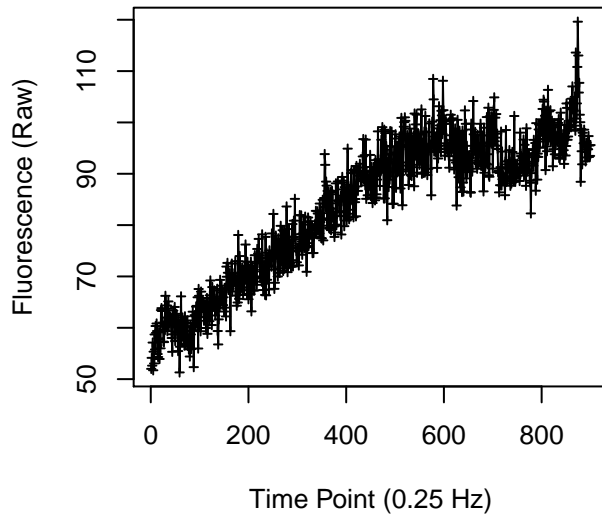

**Cell 1303**

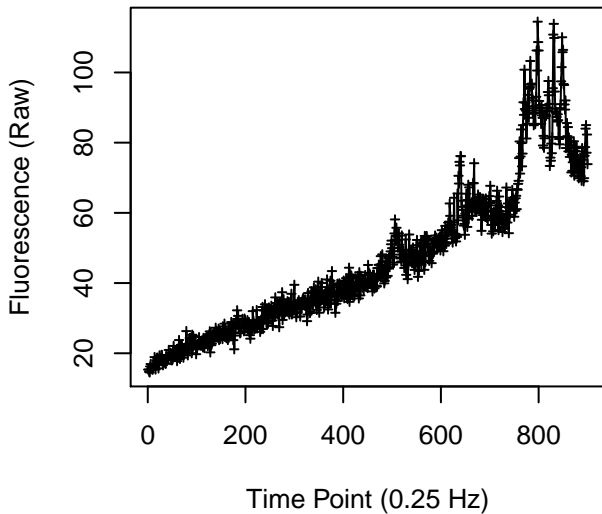

**Cell 1304**

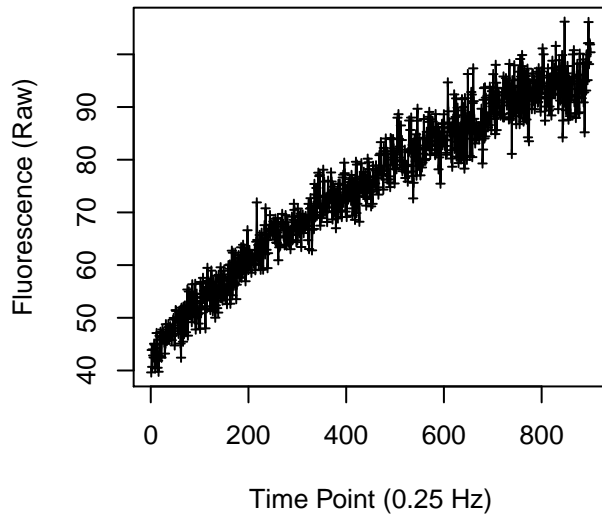

**Cell 1305**

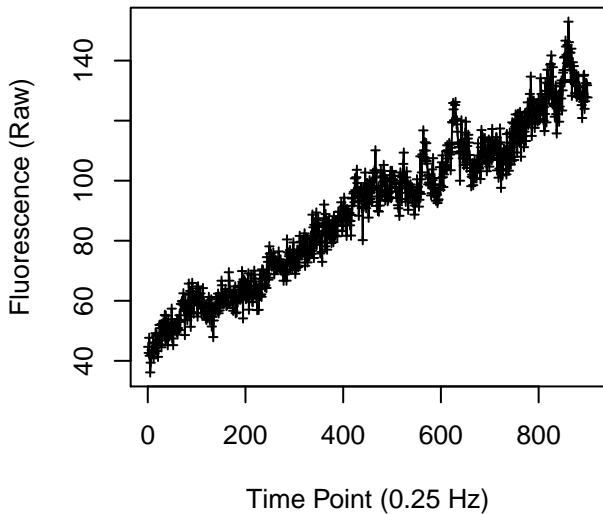

**Cell 1306**

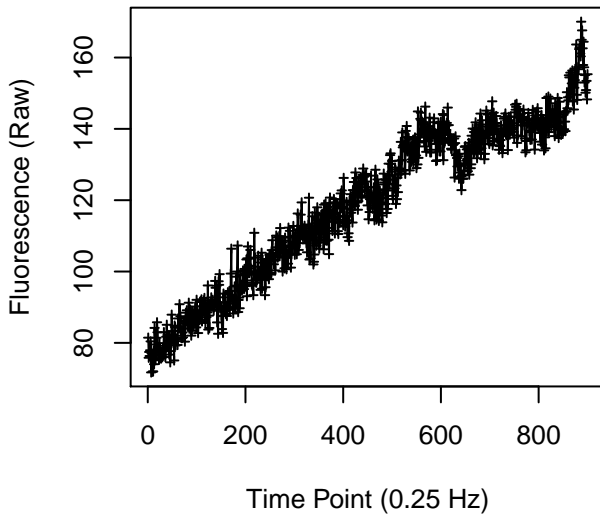

**Cell 1307**

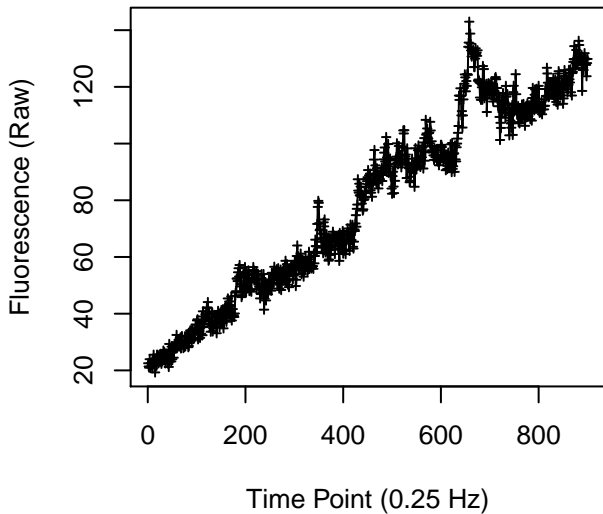

**Cell 1308**

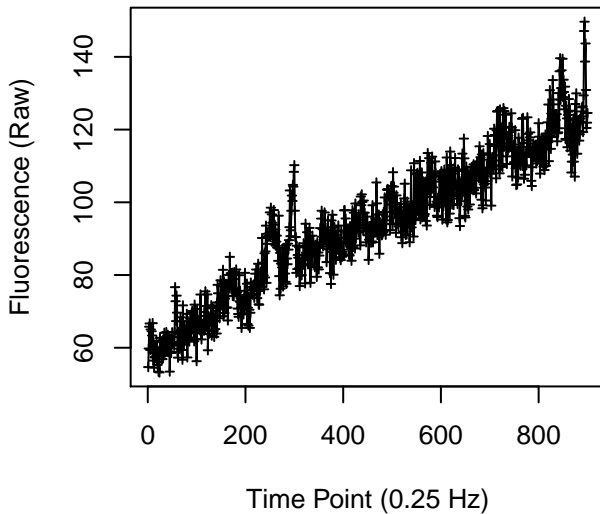

**Cell 1309**

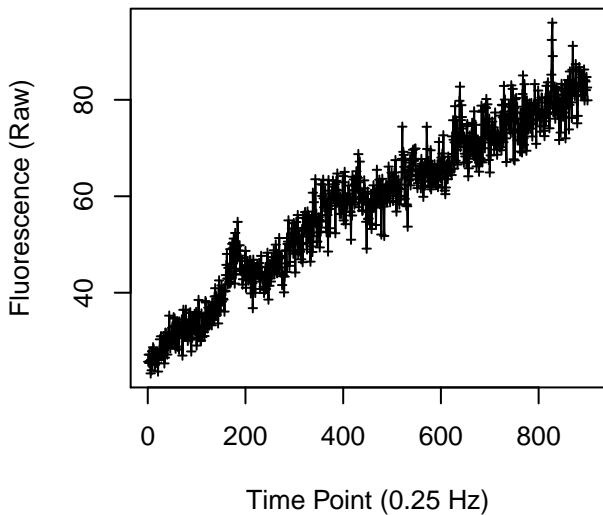

**Cell 1310**

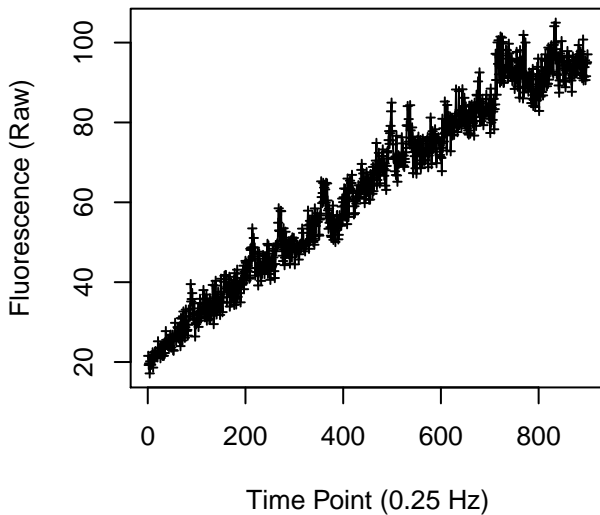

**Cell 1311**

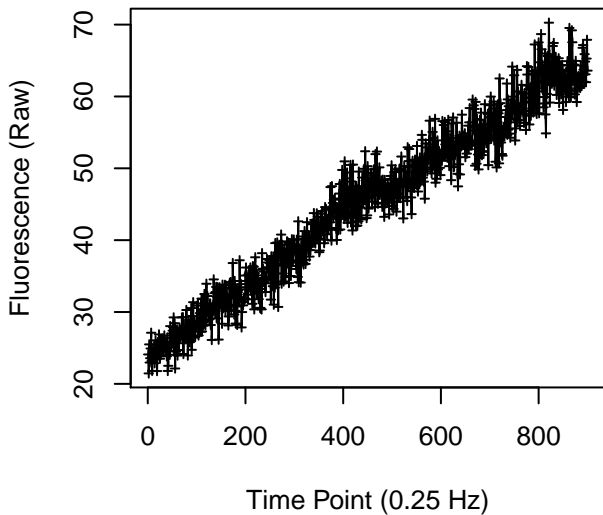

**Cell 1312**

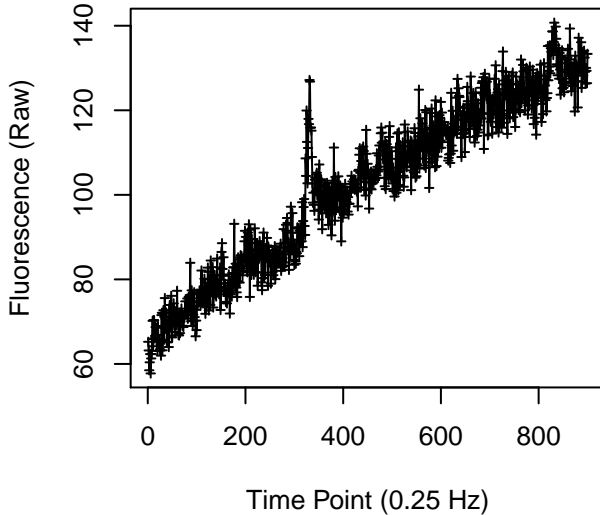

**Cell 1313**

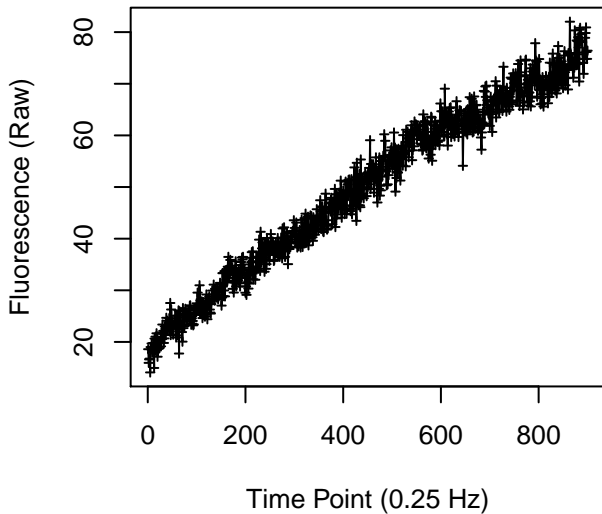

**Cell 1314**

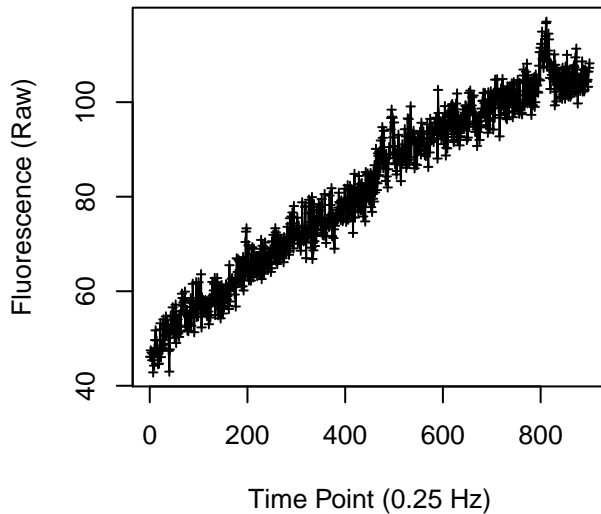

**Cell 1315**

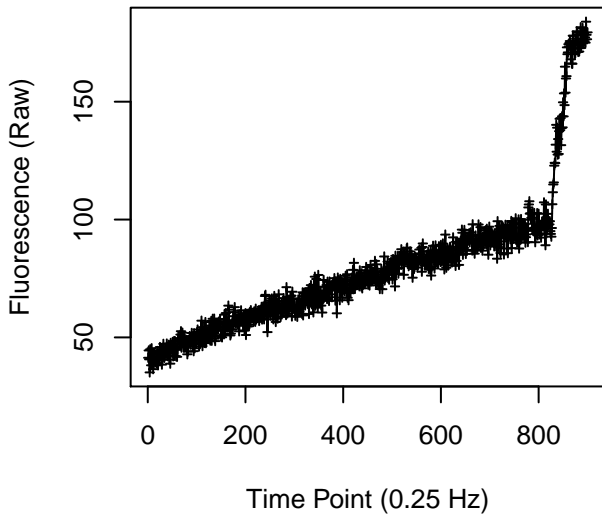

**Cell 1316**

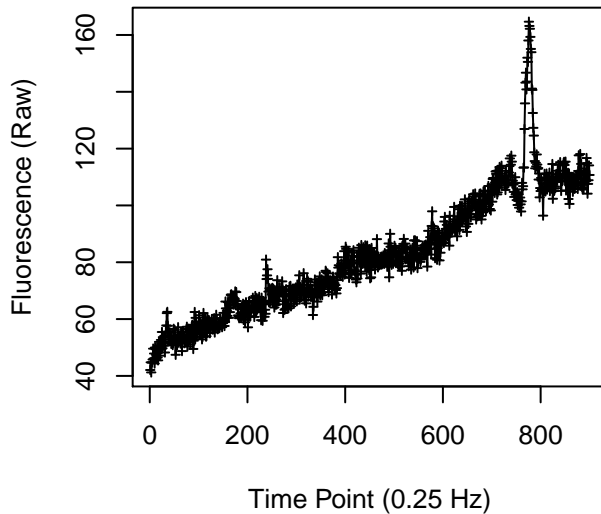

**Cell 1317**

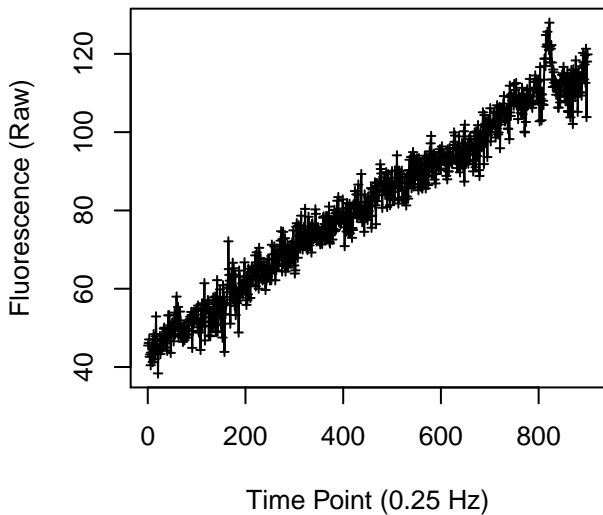

**Cell 1318**

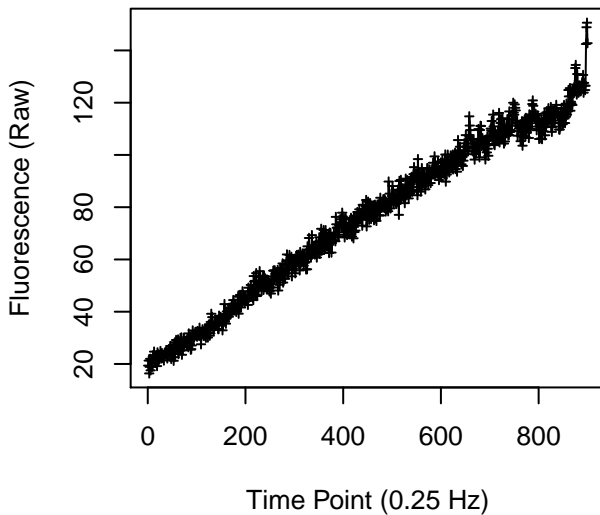

**Cell 1319**

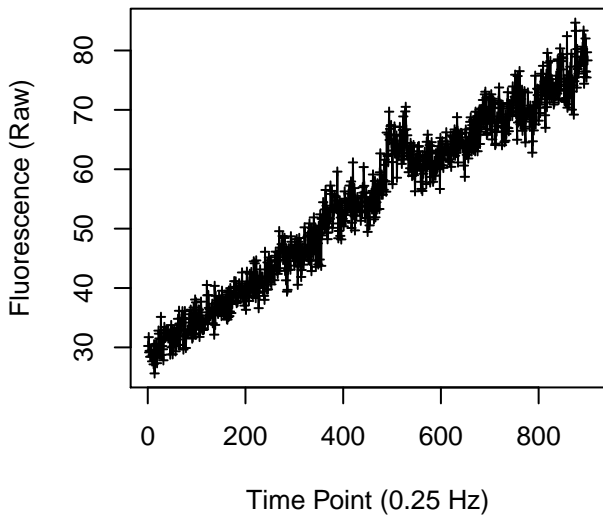

**Cell 1320**

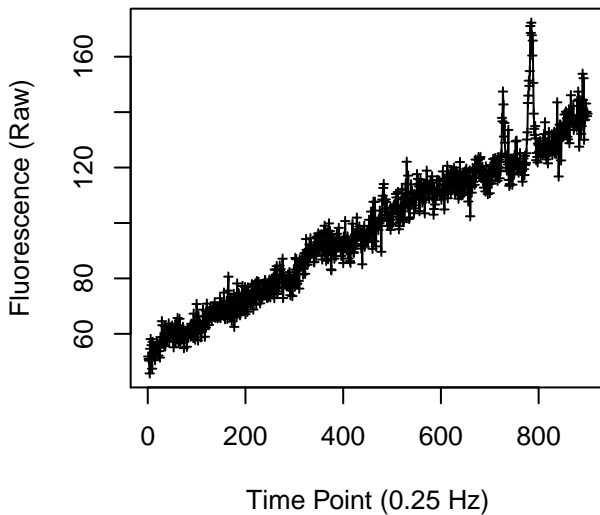



**Cell 1321**

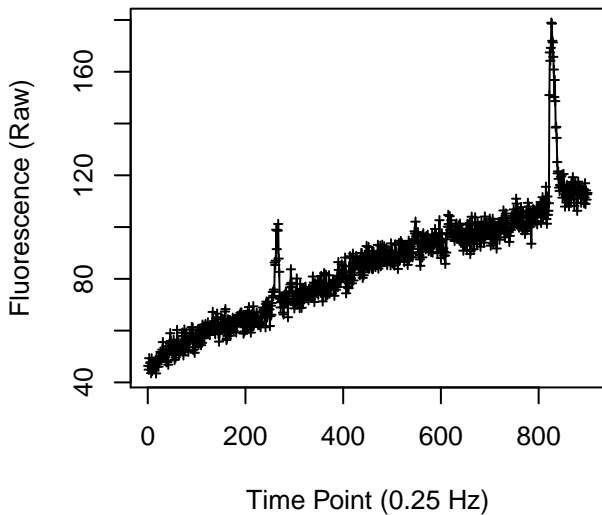

**Cell 1322**

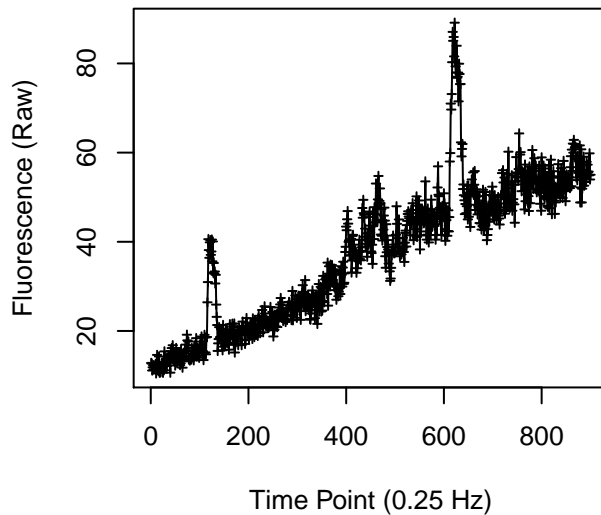

**Cell 1323**

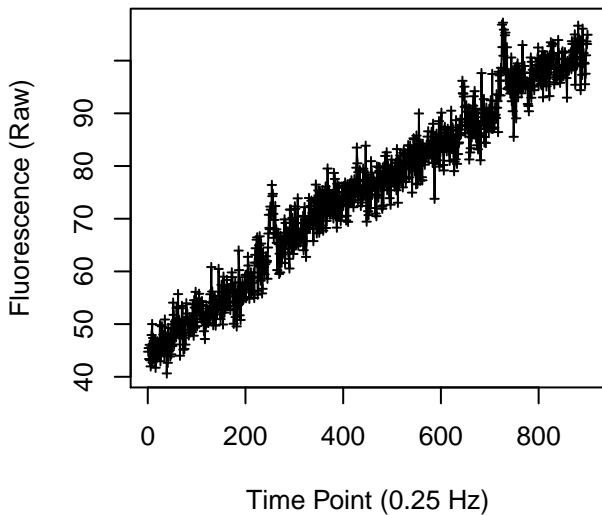

**Cell 1324**

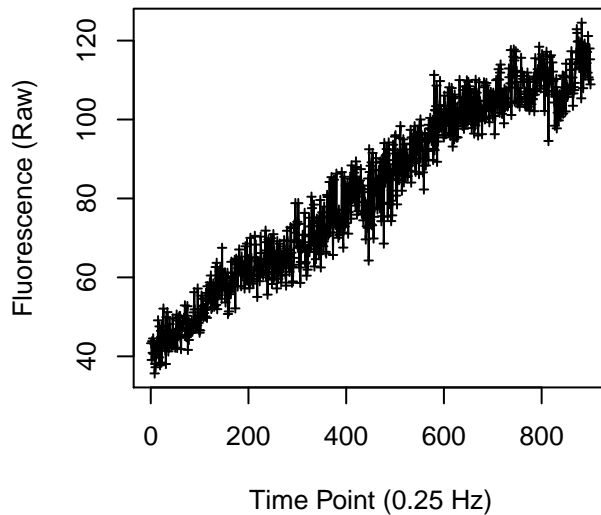

**Cell 1325**

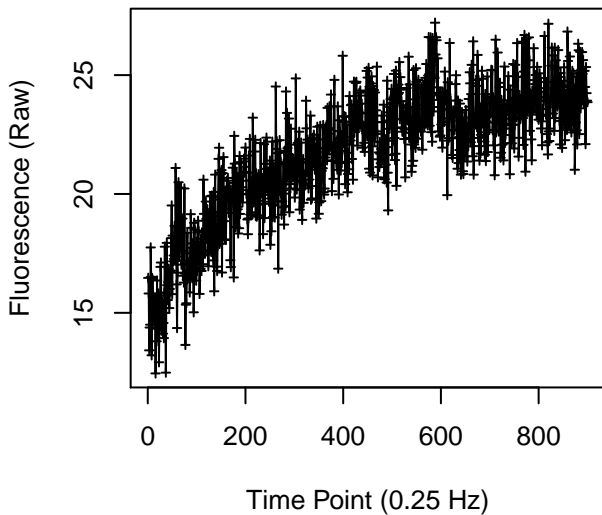

**Cell 1326**

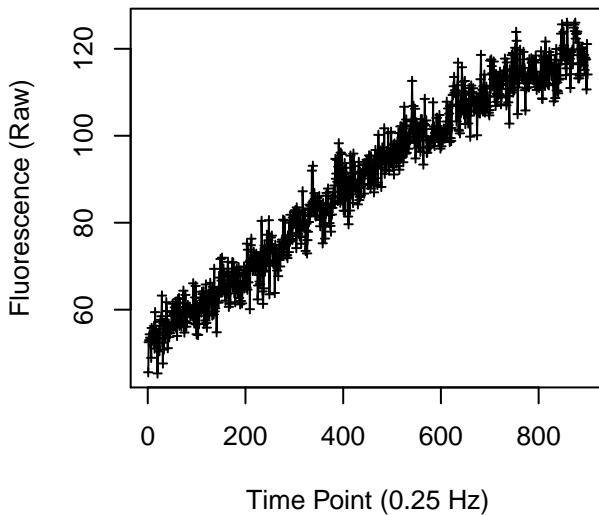

**Cell 1327**

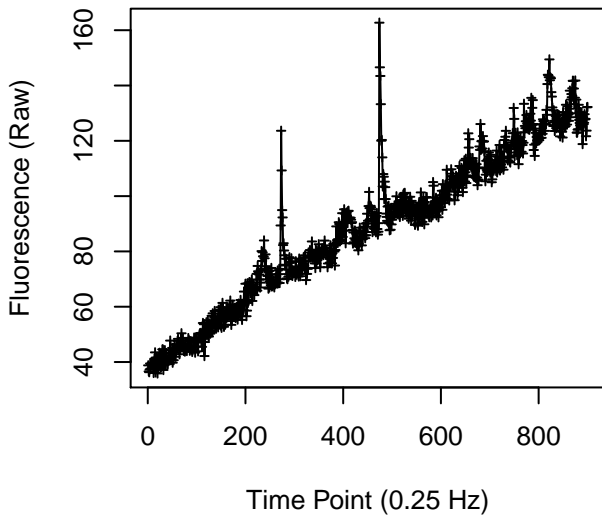

**Cell 1328**

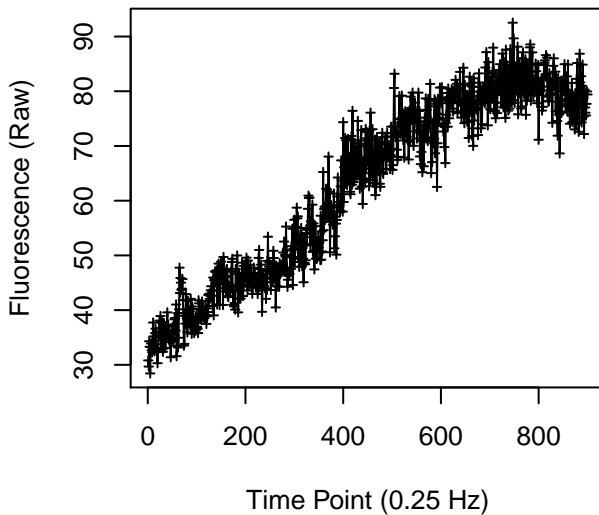

**Cell 1329**

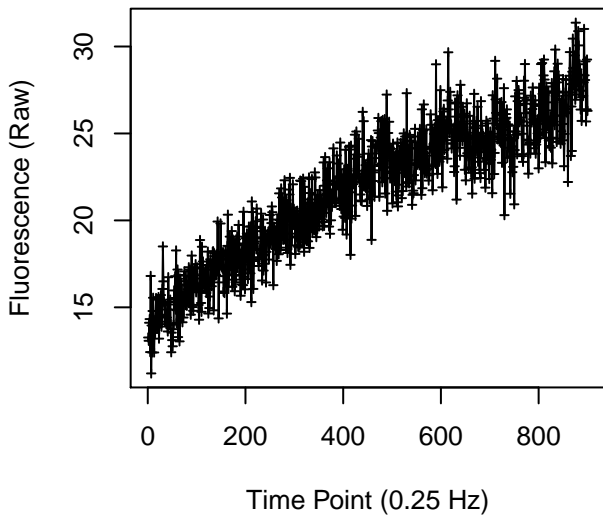

**Cell 1330**

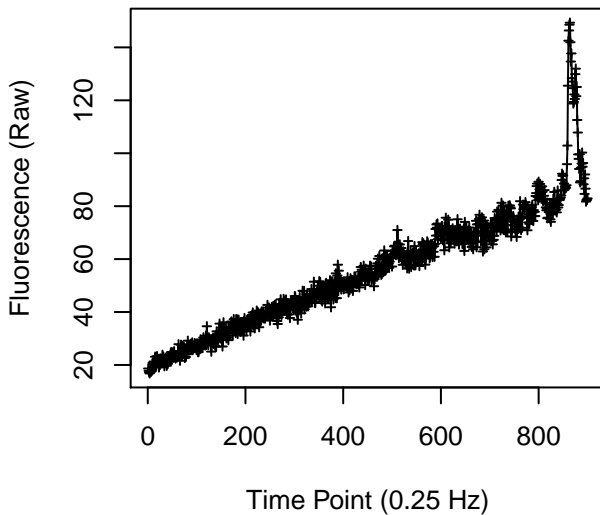

**Cell 1331**

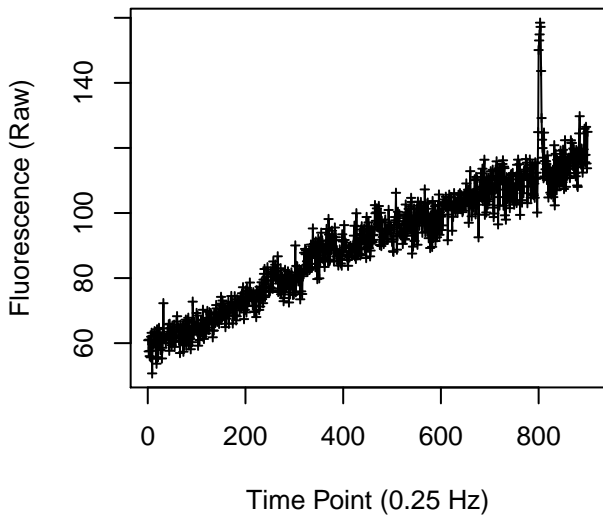

**Cell 1332**

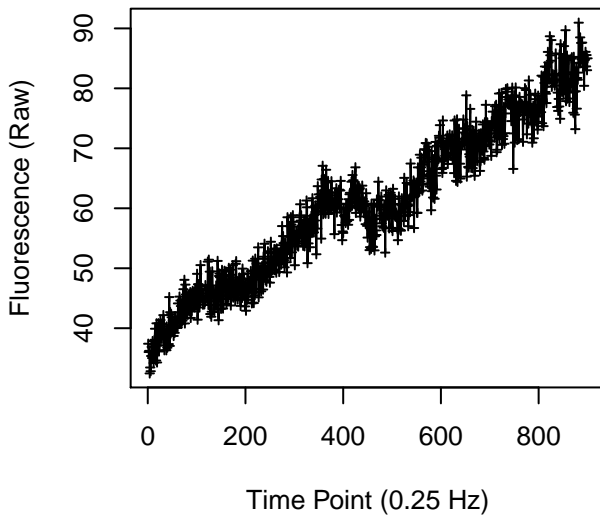

**Cell 1333**

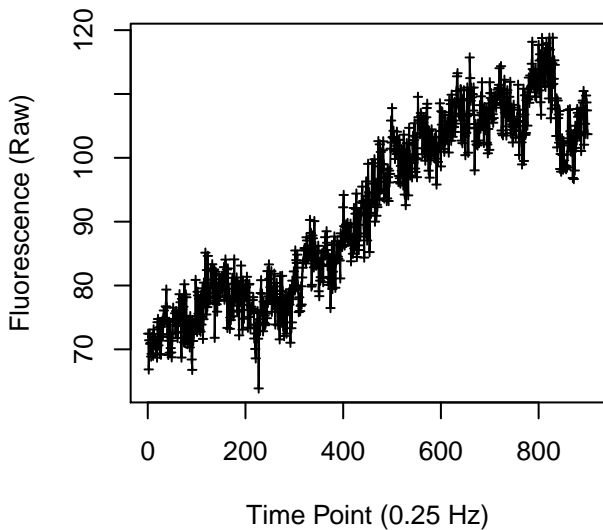

**Cell 1334**

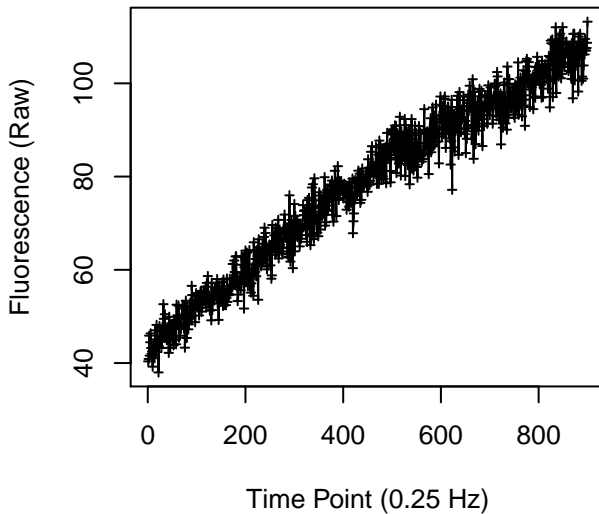

**Cell 1335**

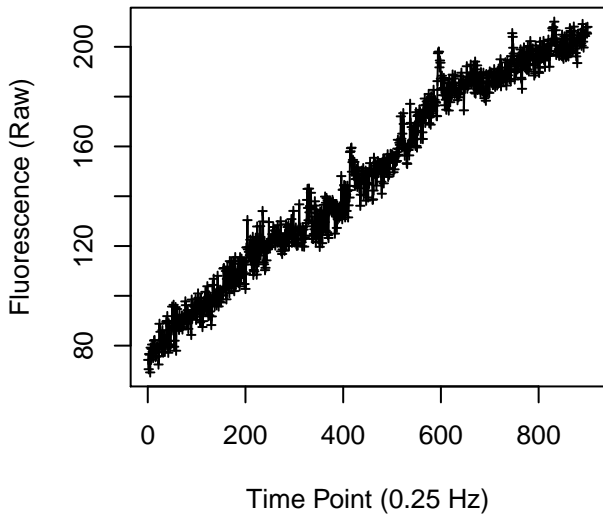

**Cell 1336**

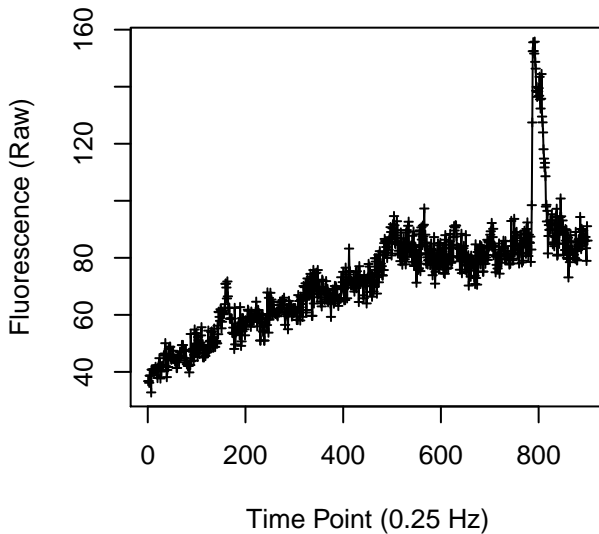

**Cell 1337**

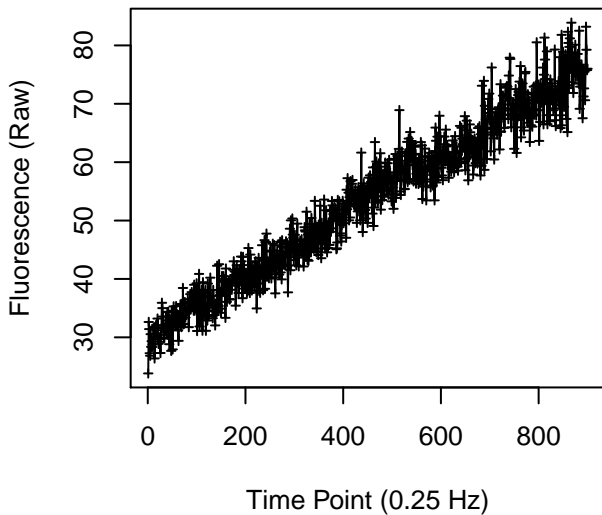

**Cell 1338**

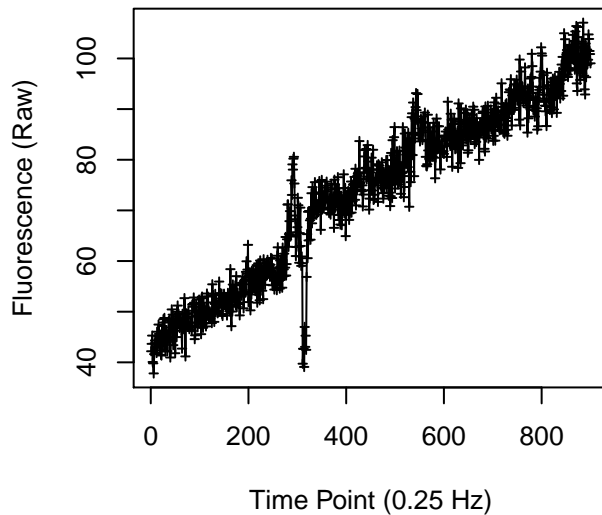

**Cell 1339**

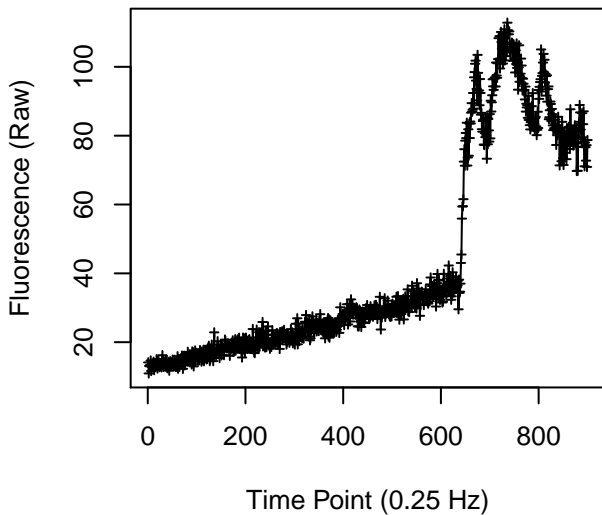

**Cell 1340**

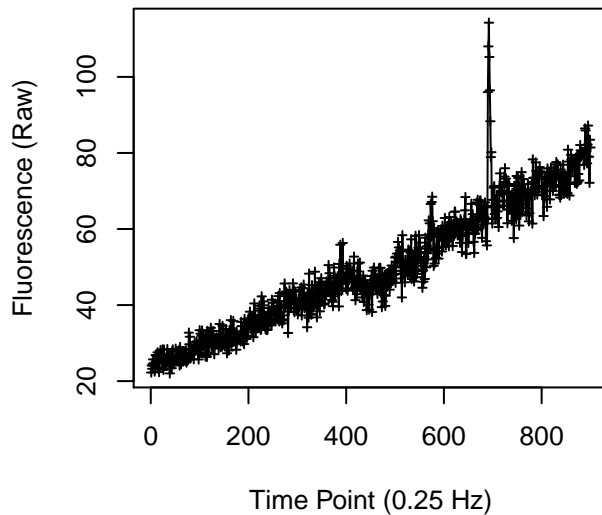

**Cell 1341**

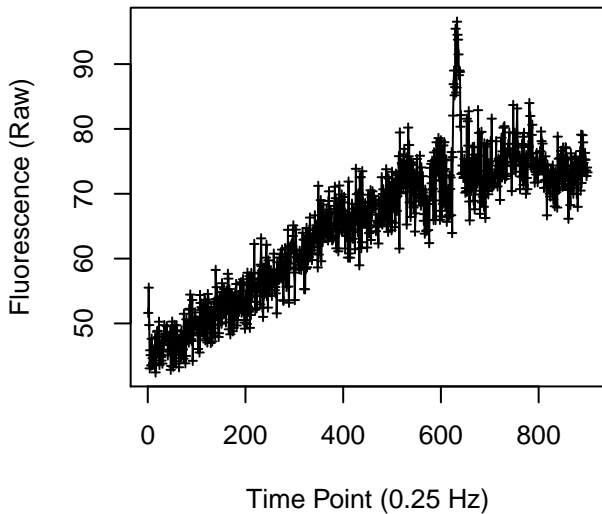

**Cell 1342**

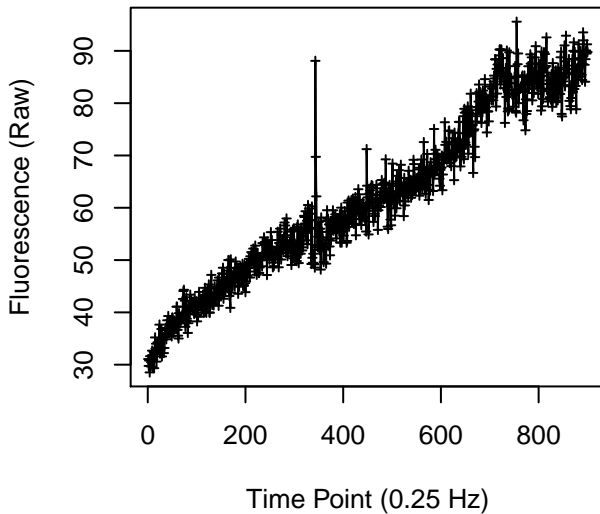

**Cell 1343**

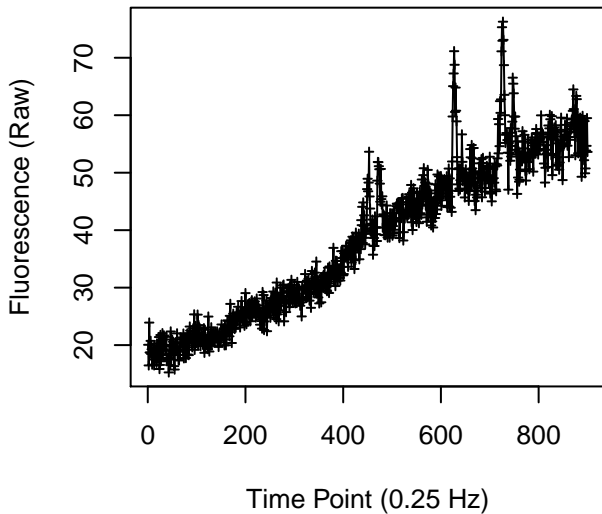

**Cell 1344**

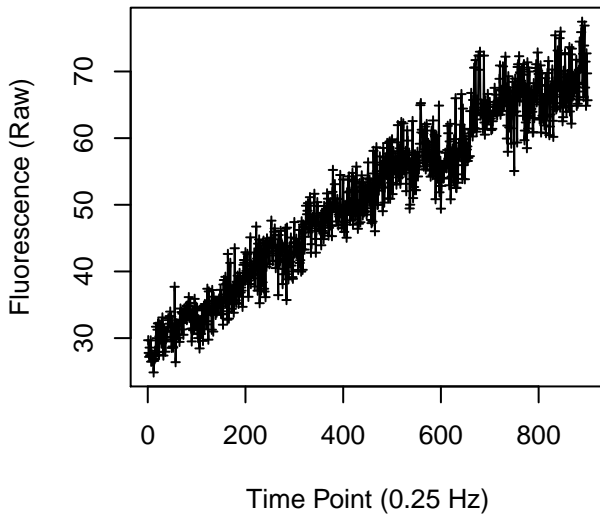

**Cell 1345**

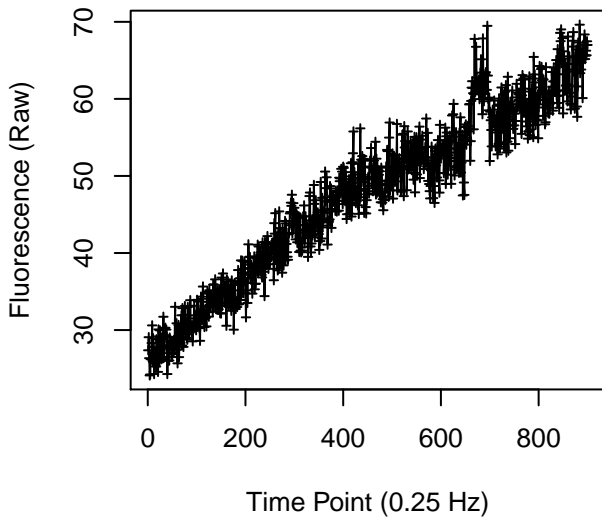

**Cell 1346**

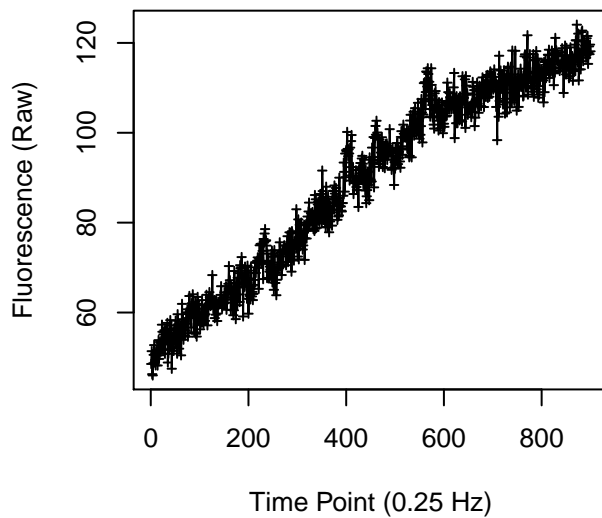

**Cell 1347**

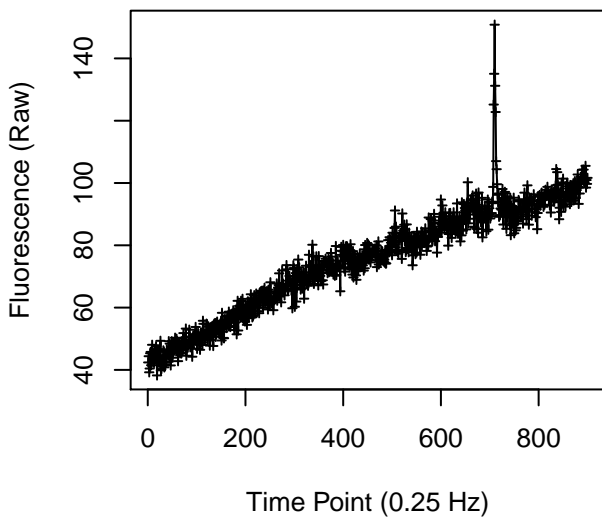

**Cell 1348**

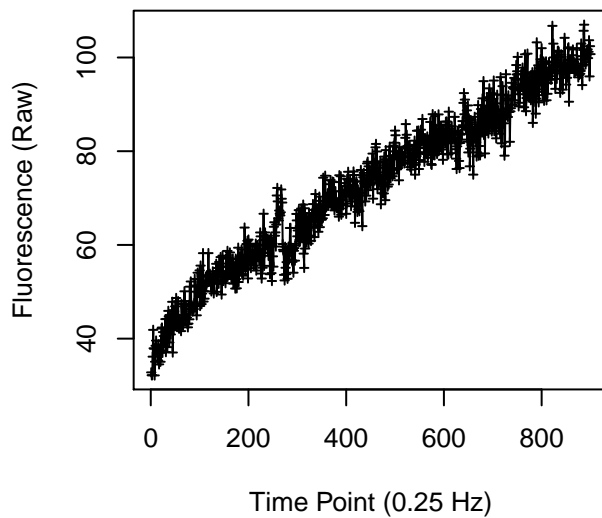

**Cell 1349**

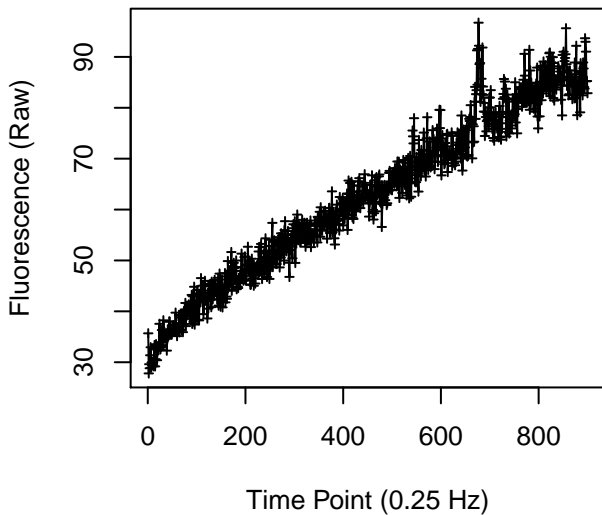

**Cell 1350**

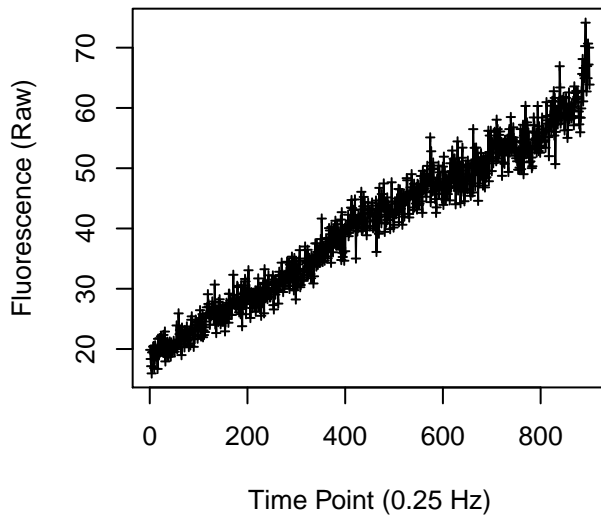

**Cell 1351**

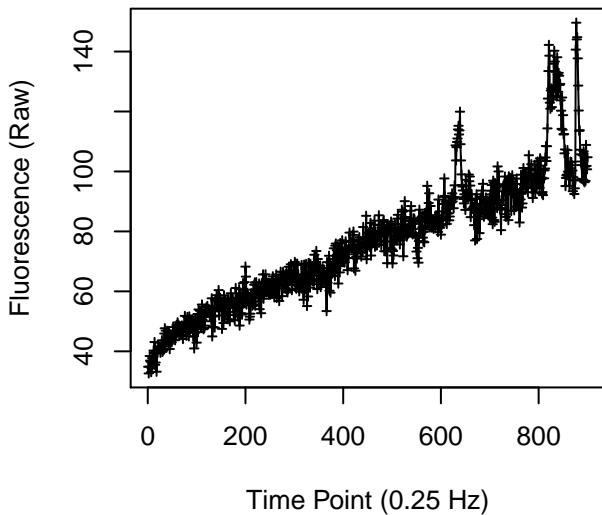

**Cell 1352**

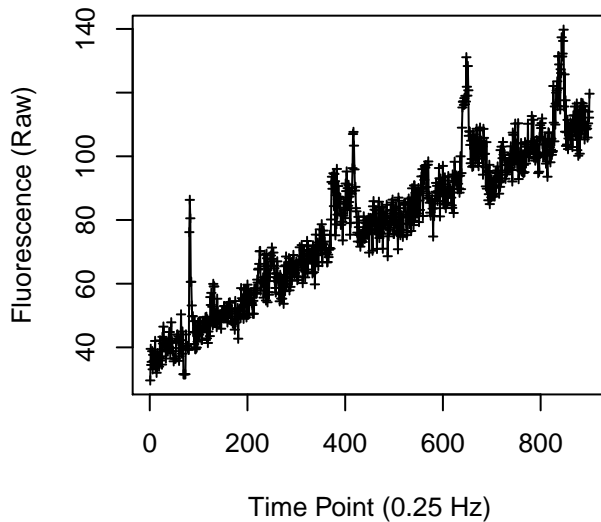



**Cell 1353**

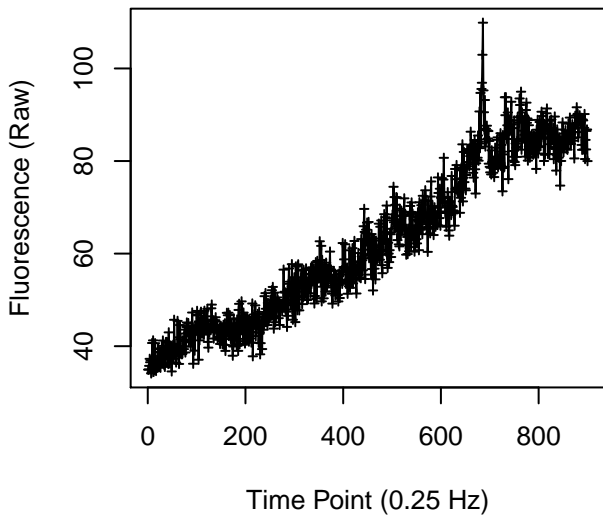

**Cell 1354**

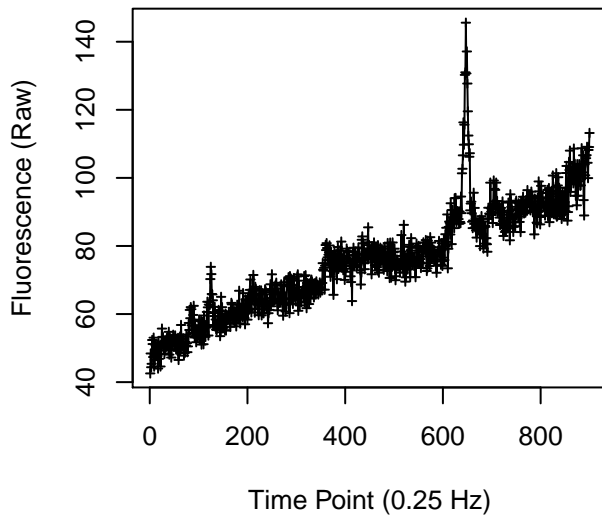

**Cell 1355**

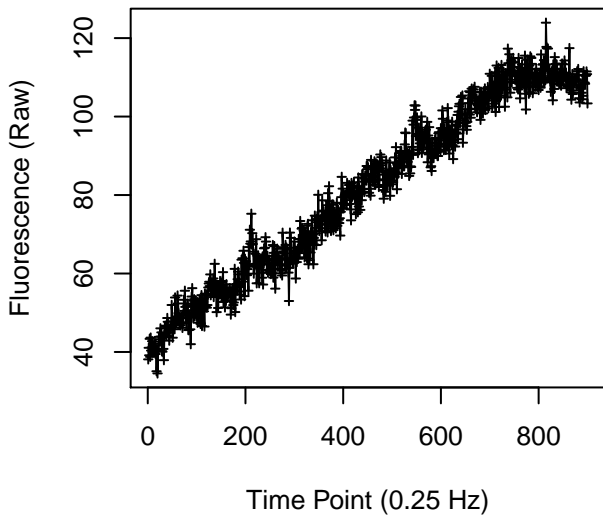

**Cell 1356**

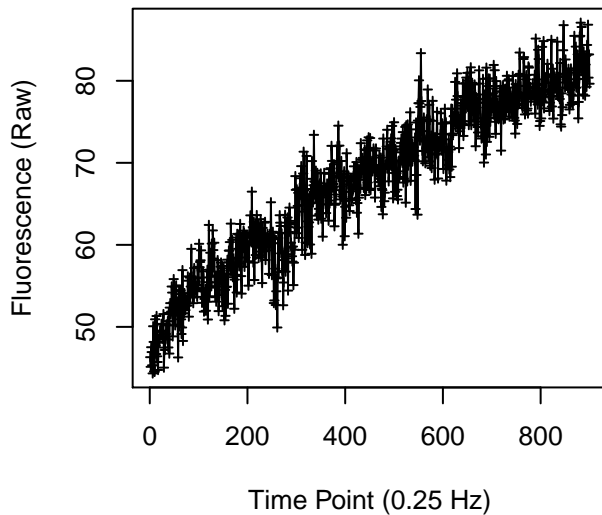

**Cell 1357**

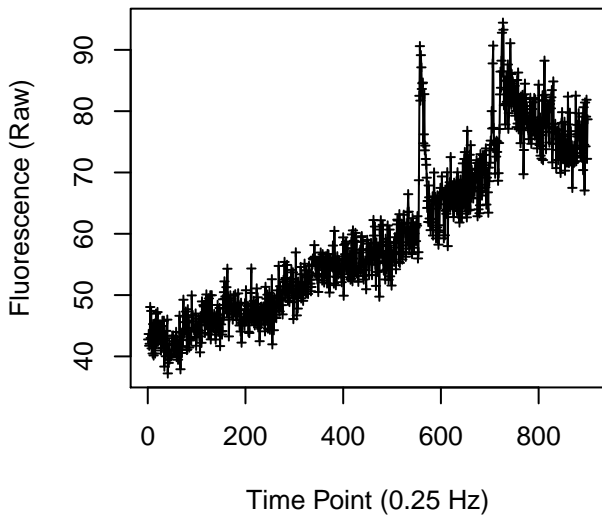

**Cell 1358**

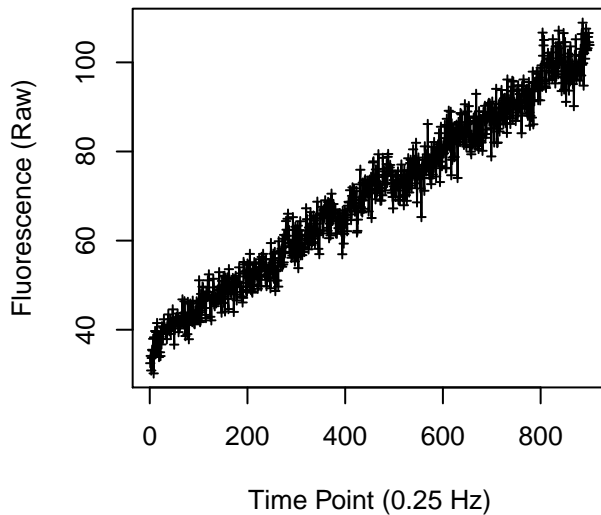

**Cell 1359**

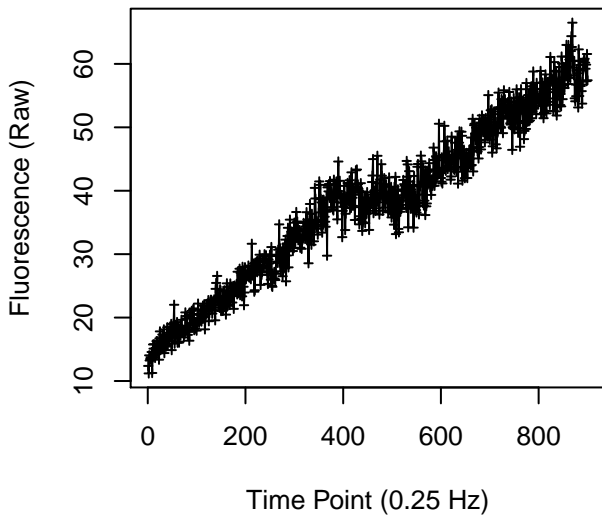

**Cell 1360**

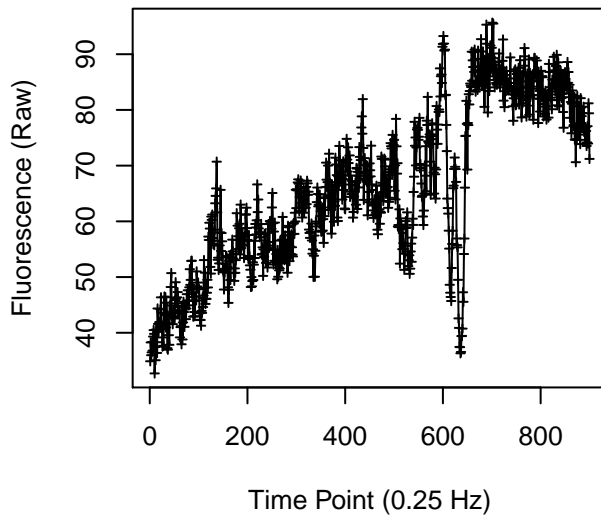

**Cell 1361**

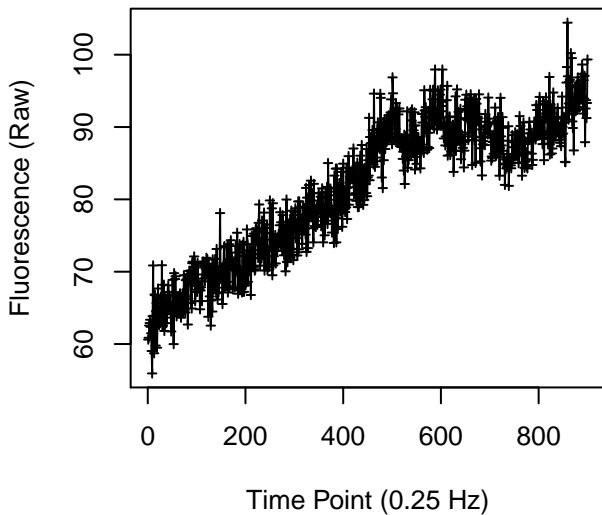

**Cell 1362**

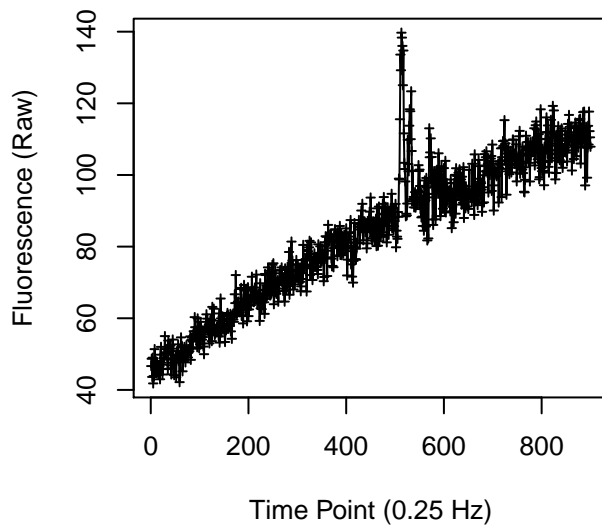

**Cell 1363**

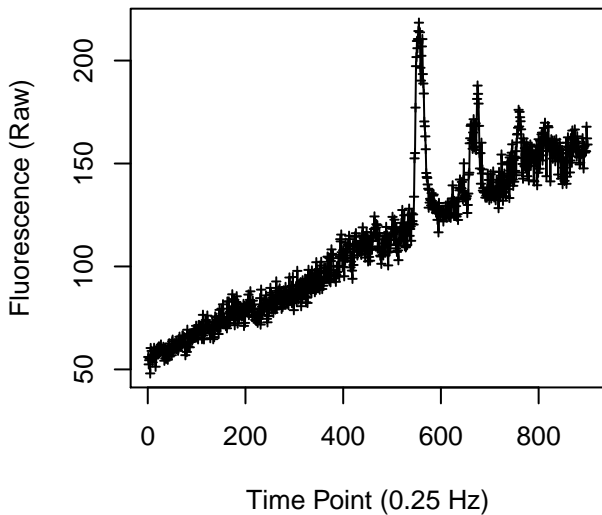

**Cell 1364**

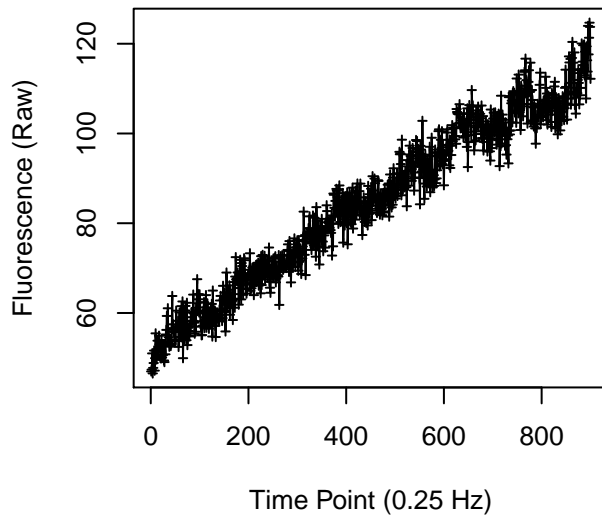

**Cell 1365**

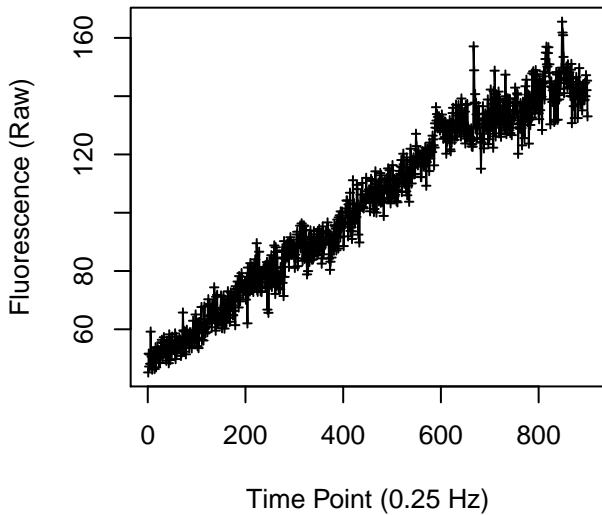

**Cell 1366**

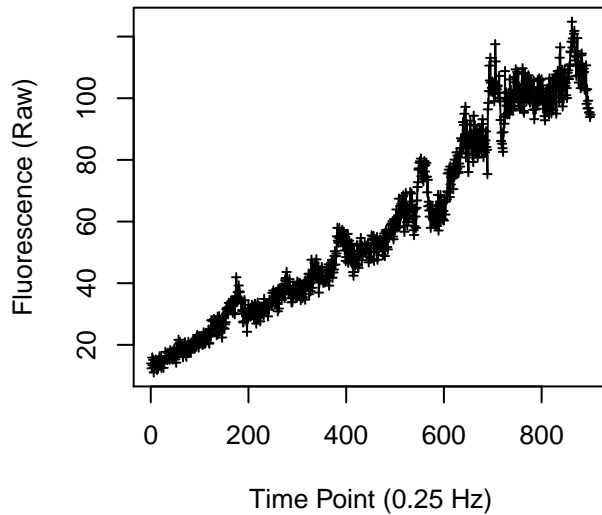

**Cell 1367**

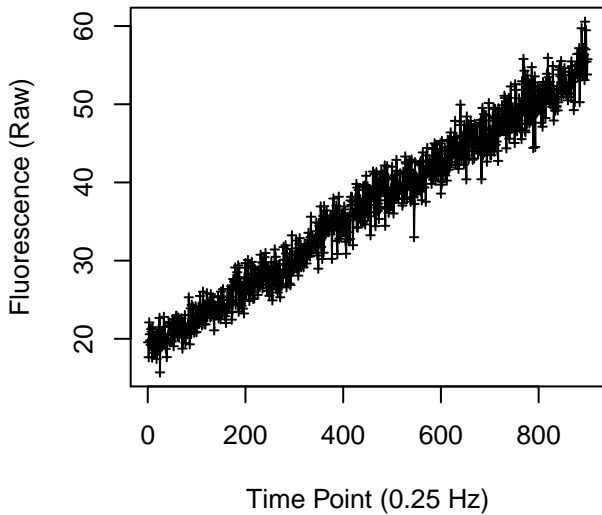

**Cell 1368**

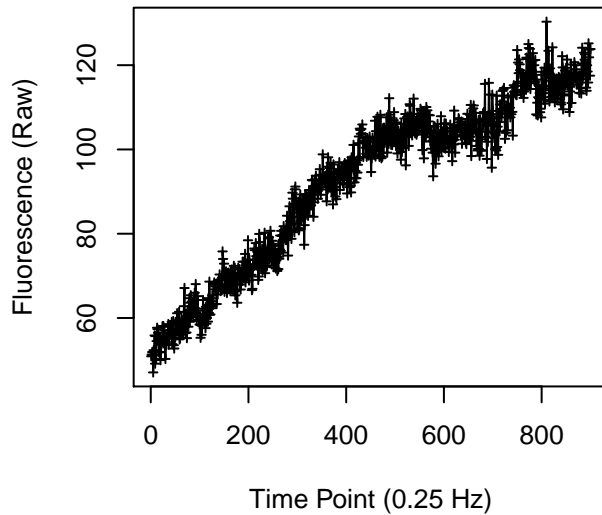

**Cell 1369**

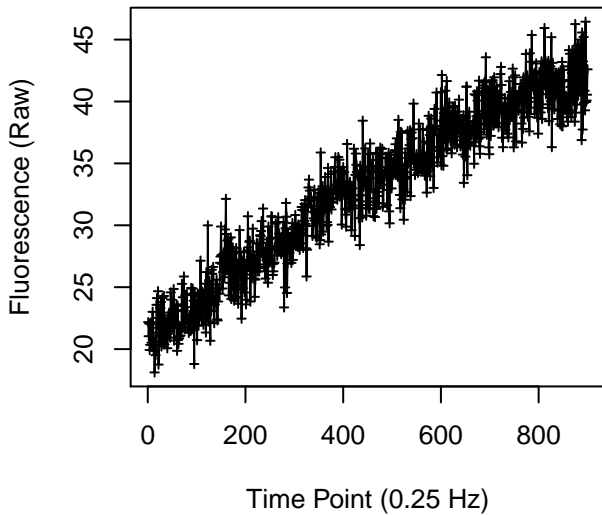

**Cell 1370**

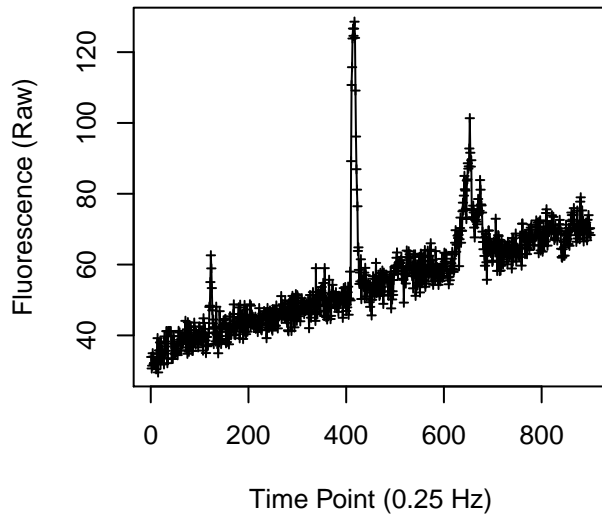

**Cell 1371**

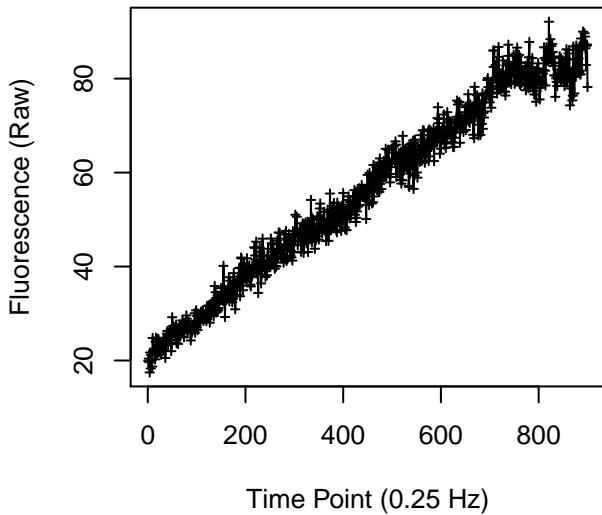

**Cell 1372**

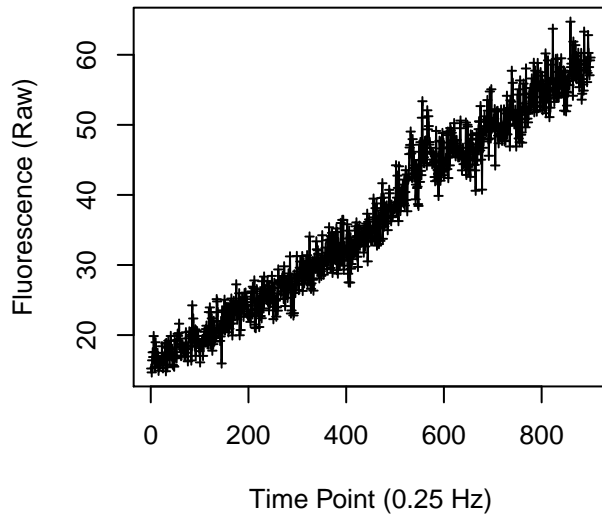

**Cell 1373**

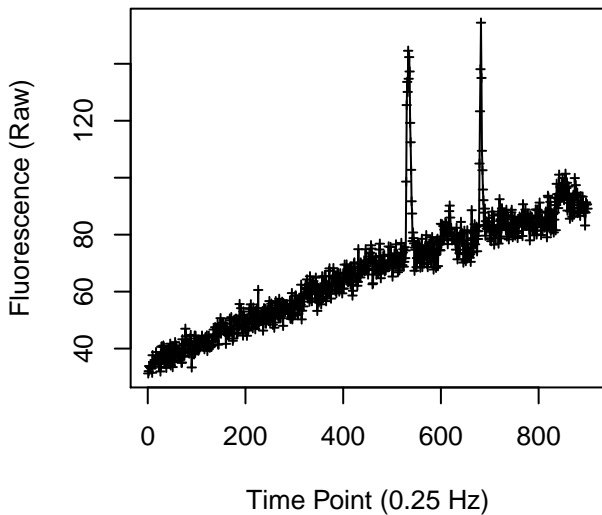

**Cell 1374**

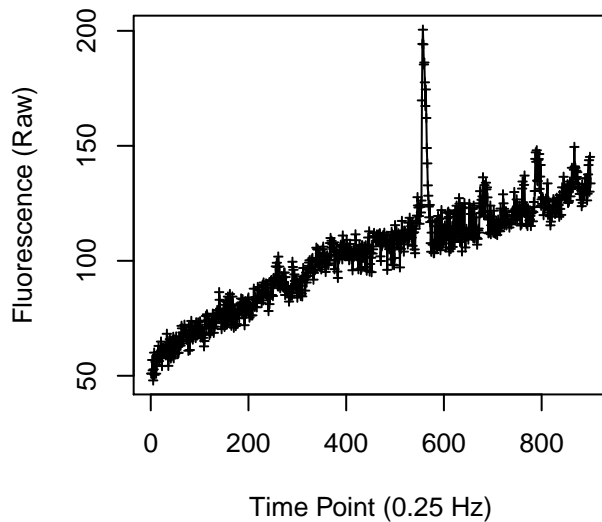

**Cell 1375**

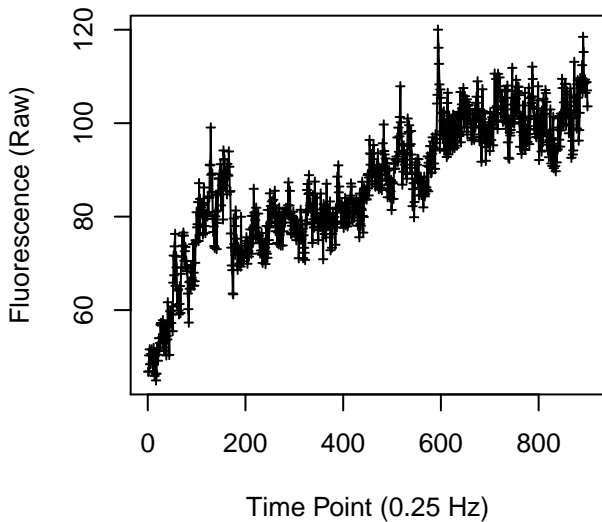

**Cell 1376**

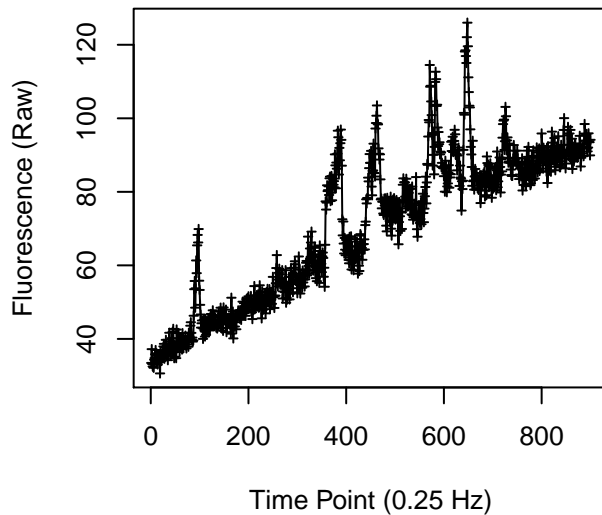

**Cell 1377**

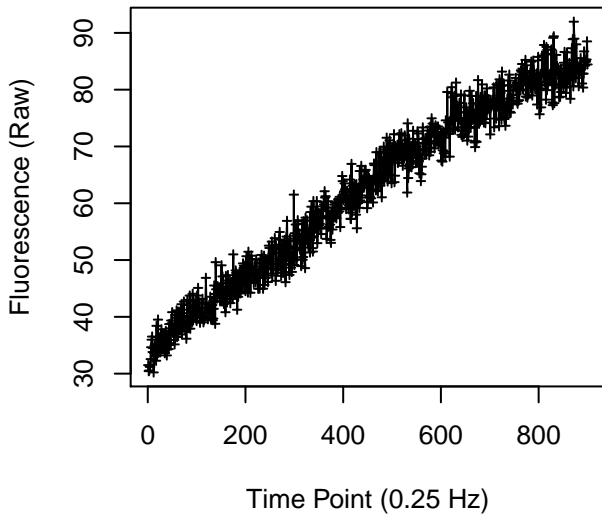

**Cell 1378**

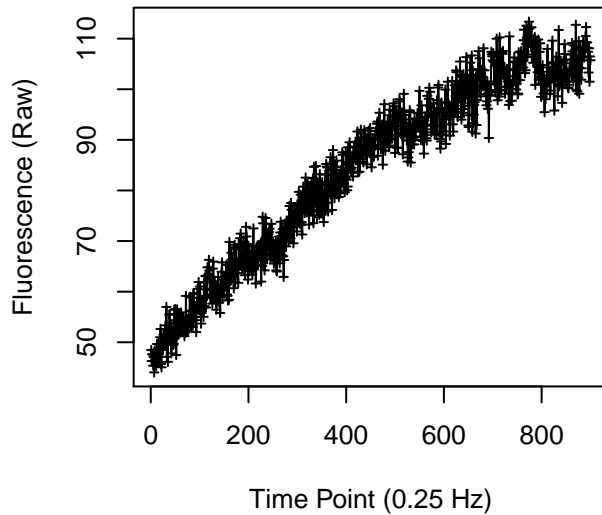

**Cell 1379**

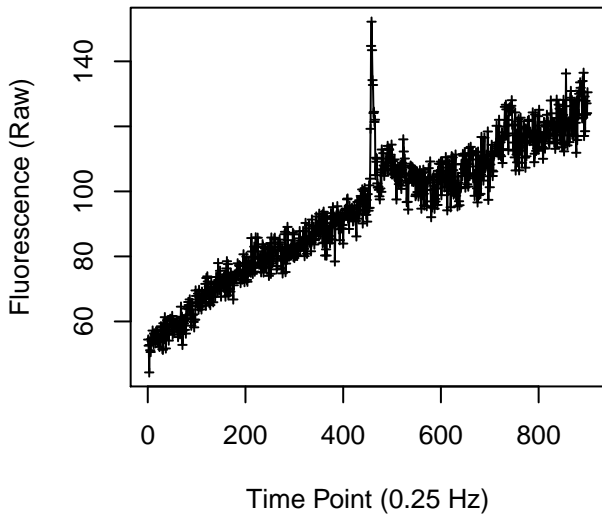

**Cell 1380**

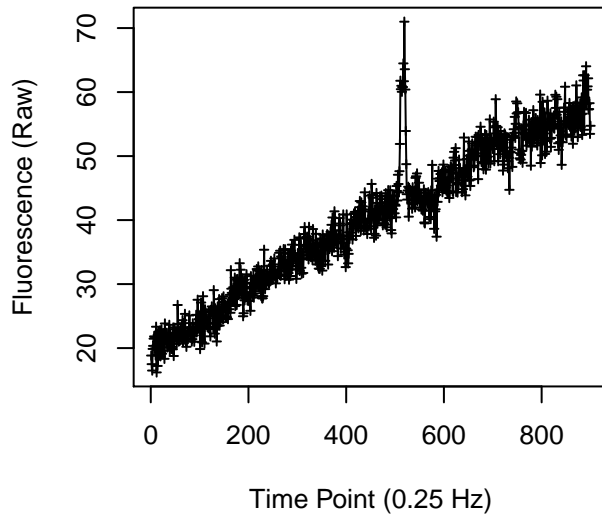

**Cell 1381**

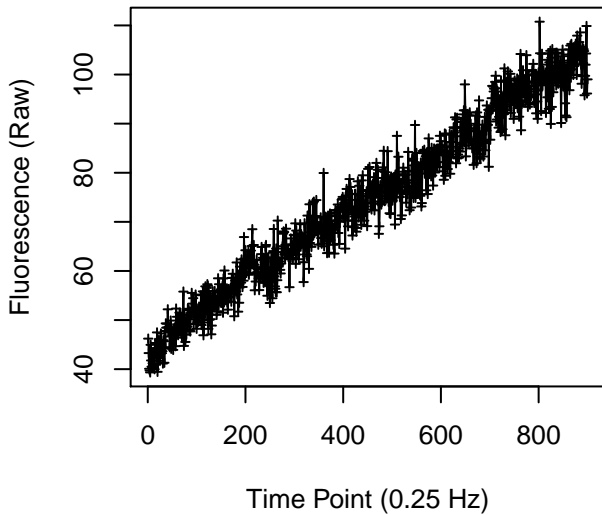

**Cell 1382**

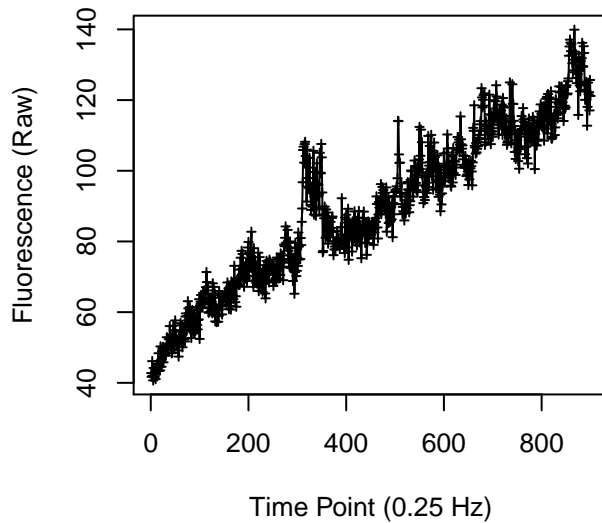

**Cell 1383**

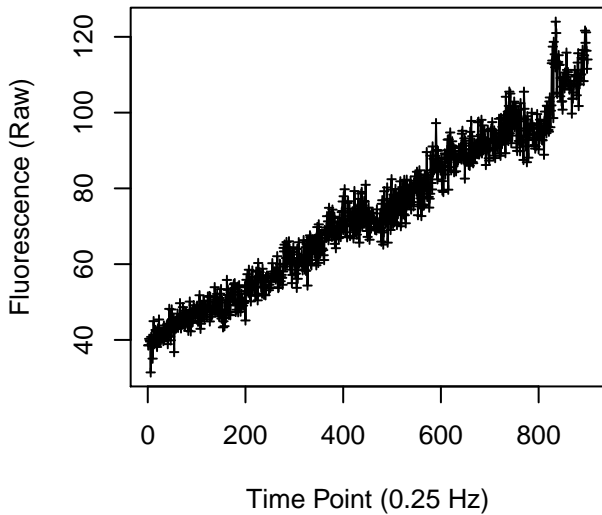

**Cell 1384**

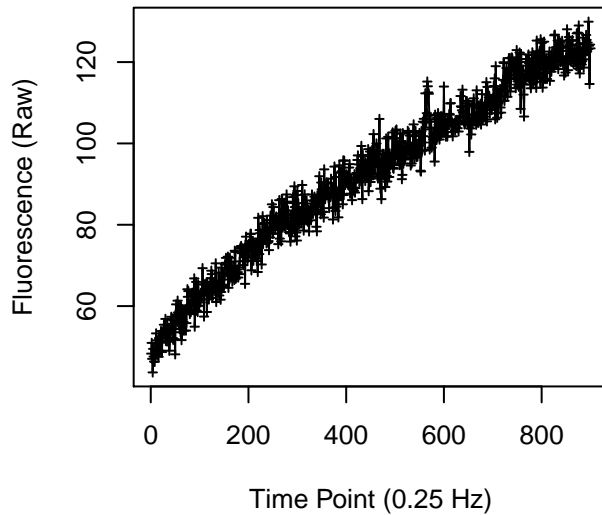



**Cell 1385**

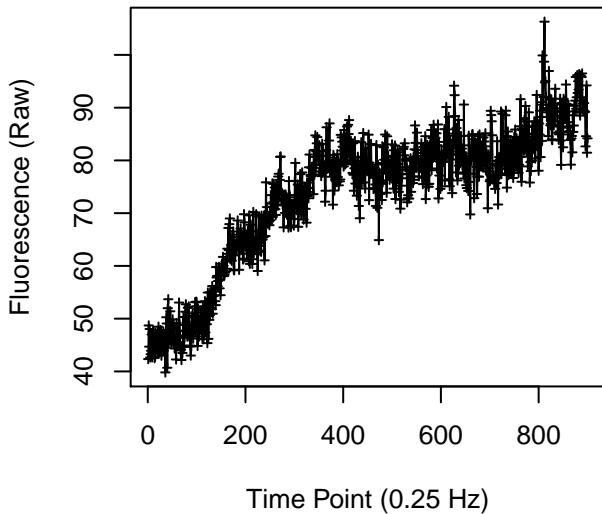

**Cell 1386**

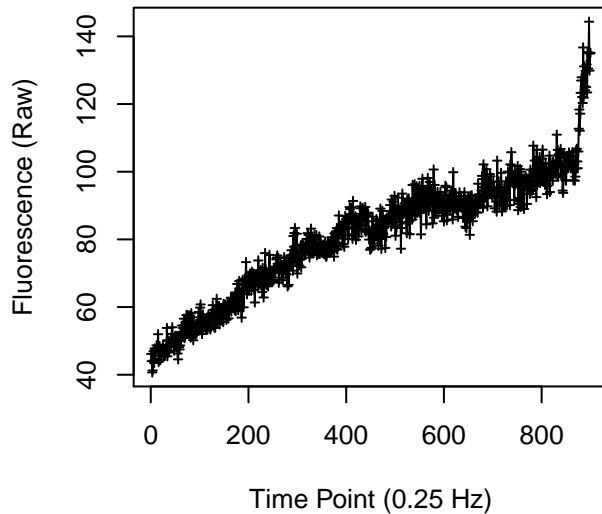

**Cell 1387**

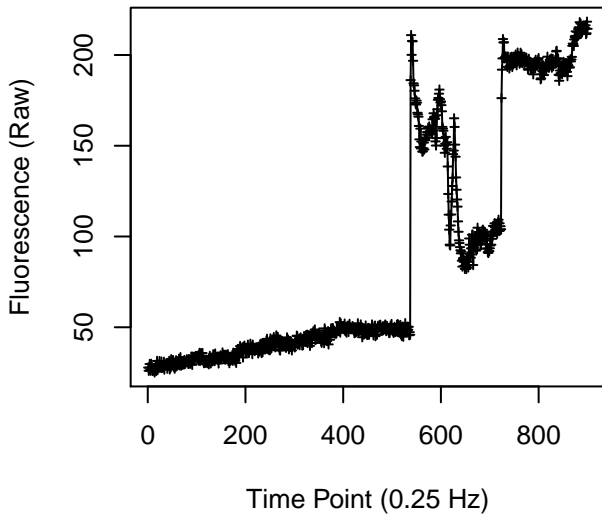

**Cell 1388**

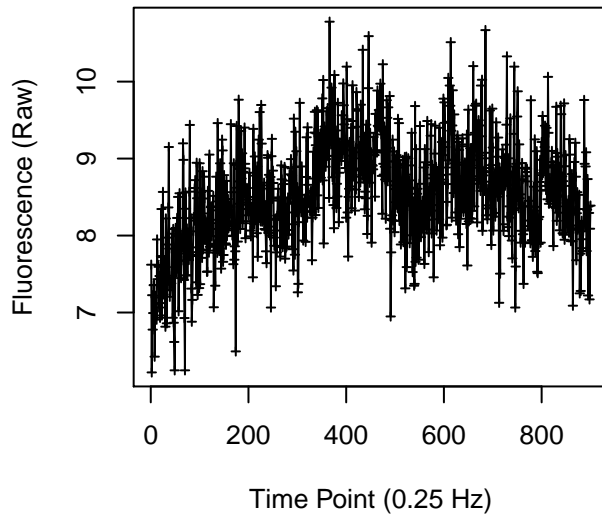

**Cell 1389**

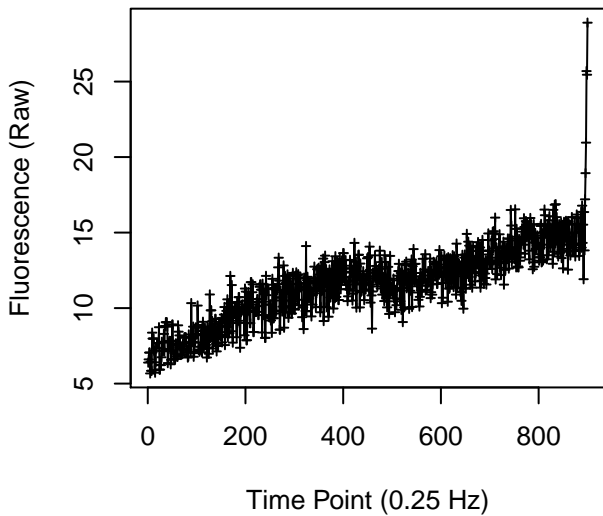

**Cell 1390**

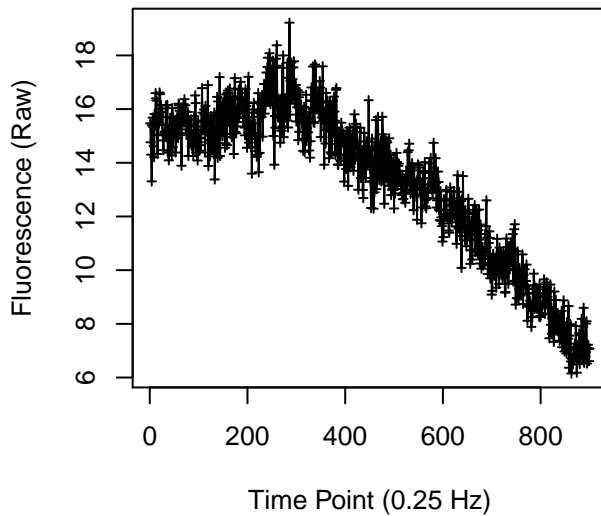

**Cell 1391**

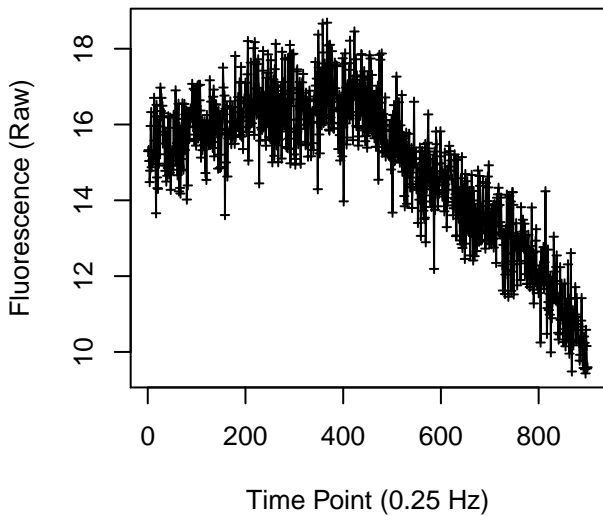

**Cell 1392**

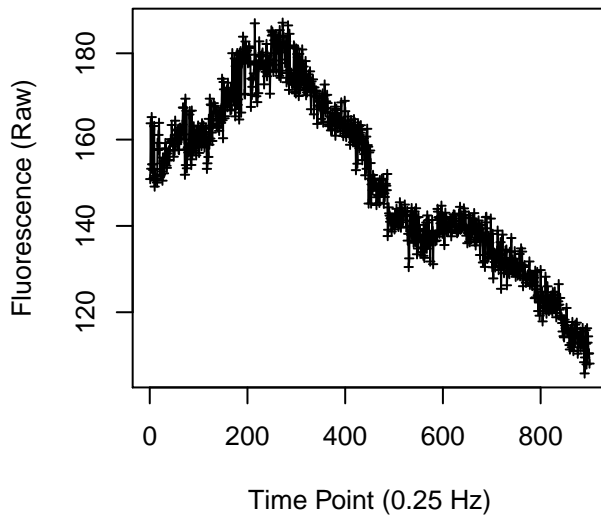

**Cell 1393**

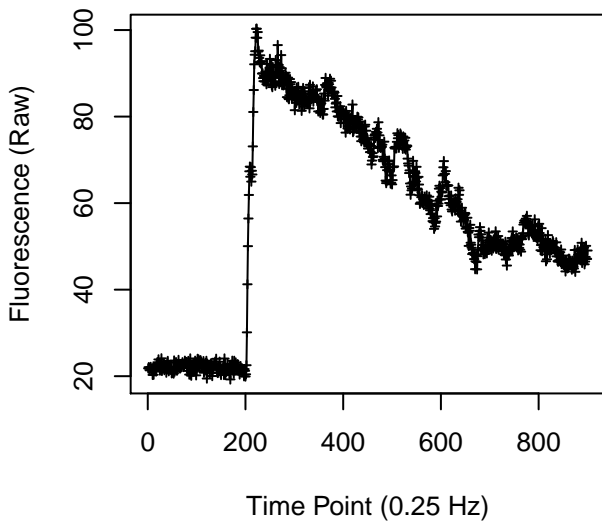

**Cell 1394**

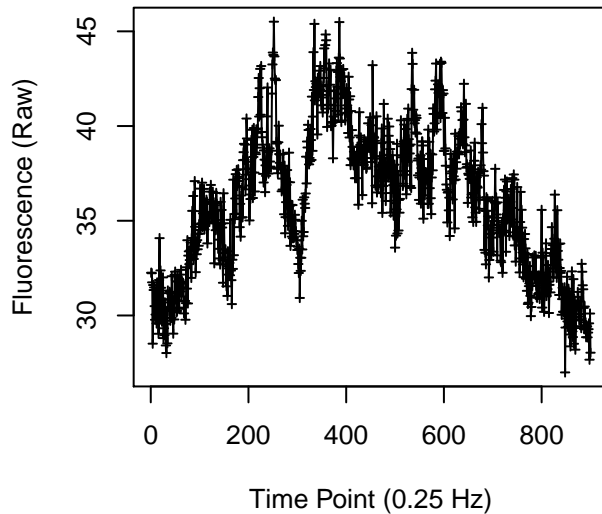

**Cell 1395**

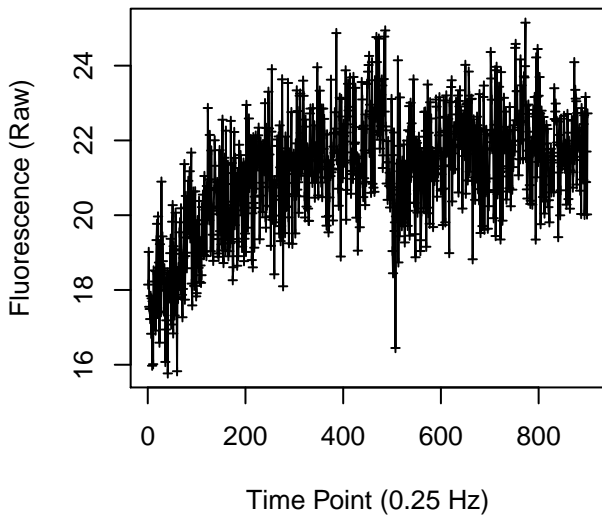

**Cell 1396**

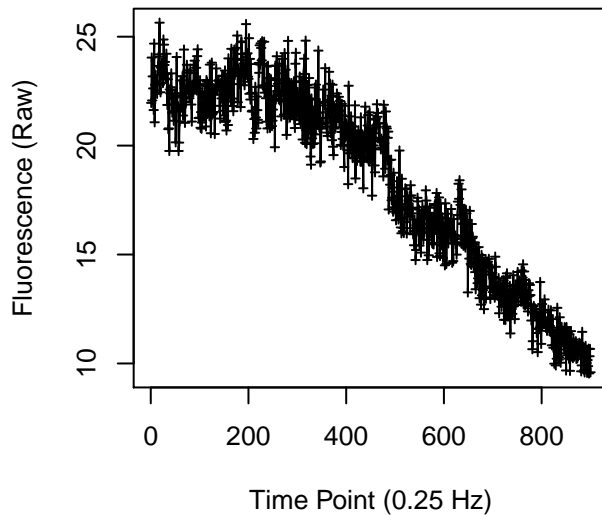

**Cell 1397**

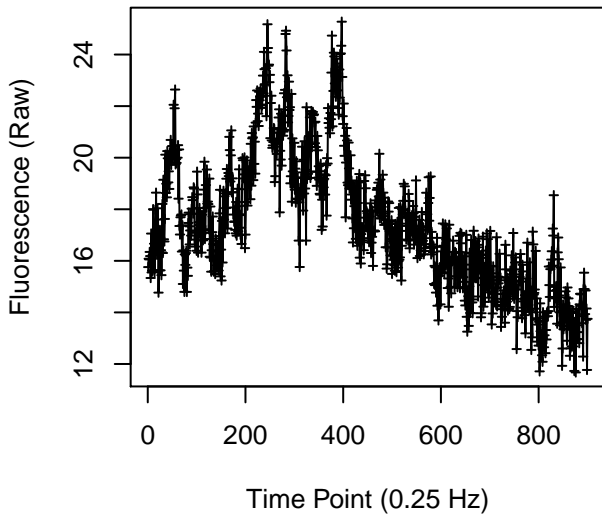

**Cell 1398**

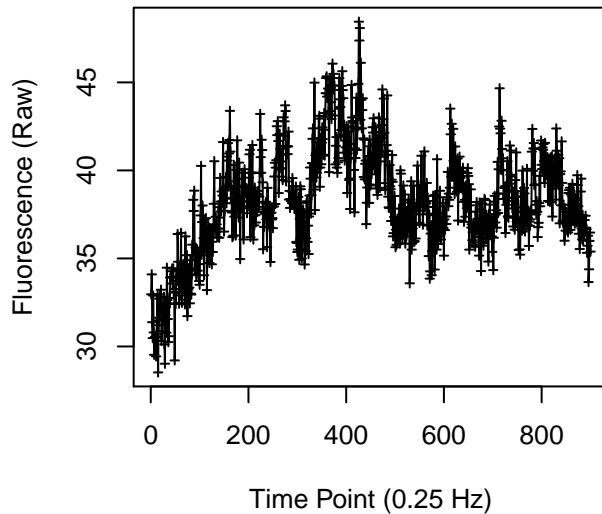

**Cell 1399**

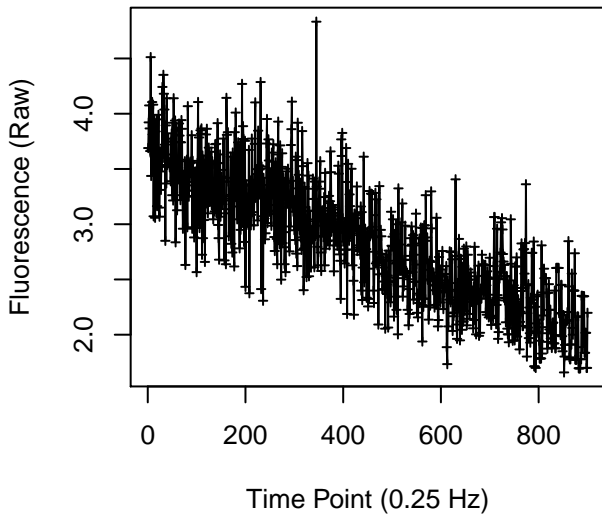

**Cell 1400**

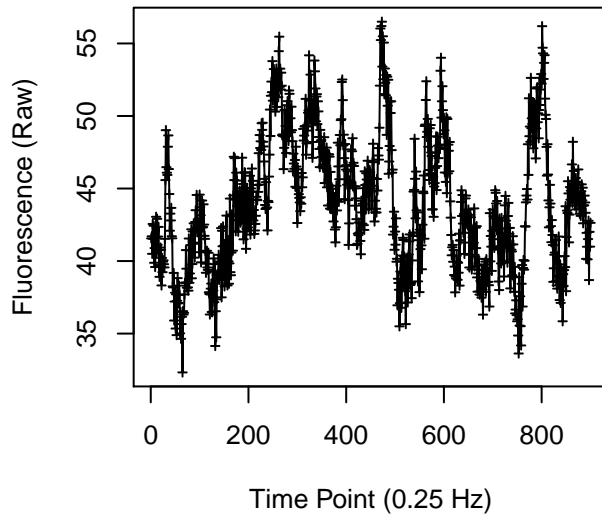

**Cell 1401**

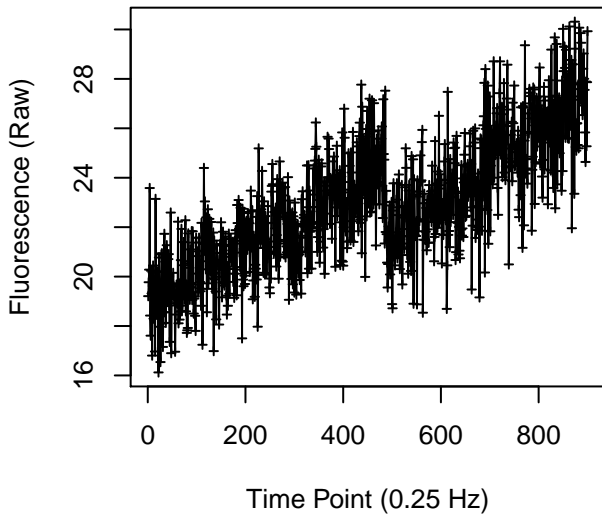

**Cell 1402**

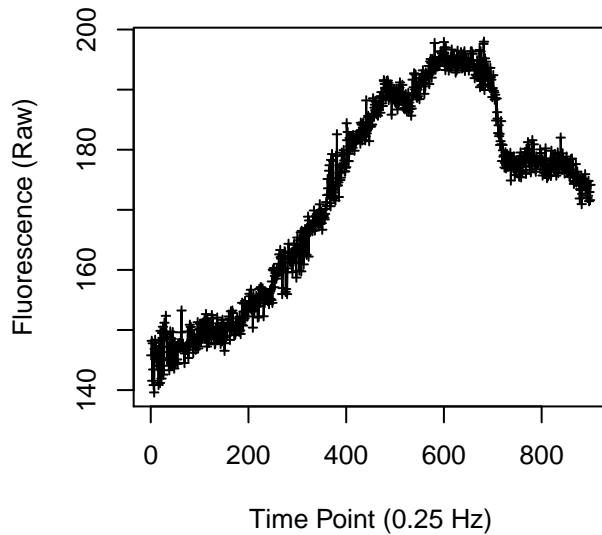

**Cell 1403**

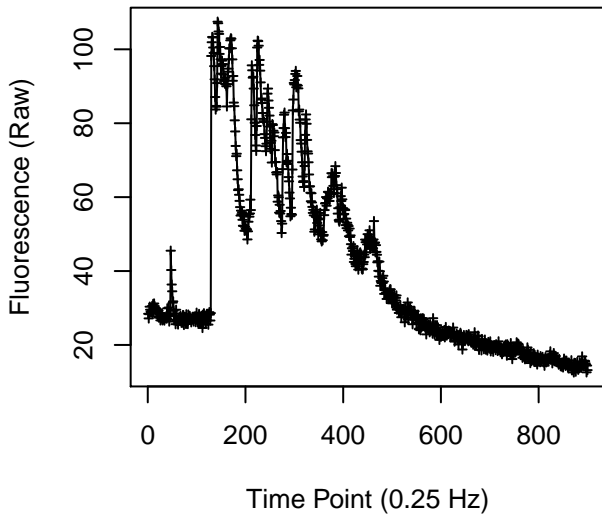

**Cell 1404**

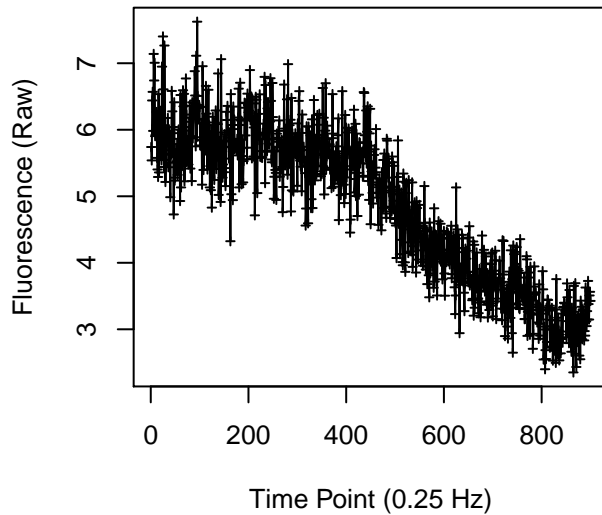

**Cell 1405**

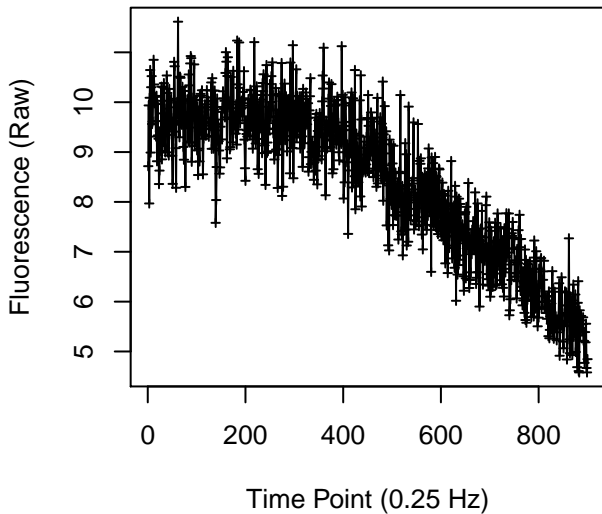

**Cell 1406**

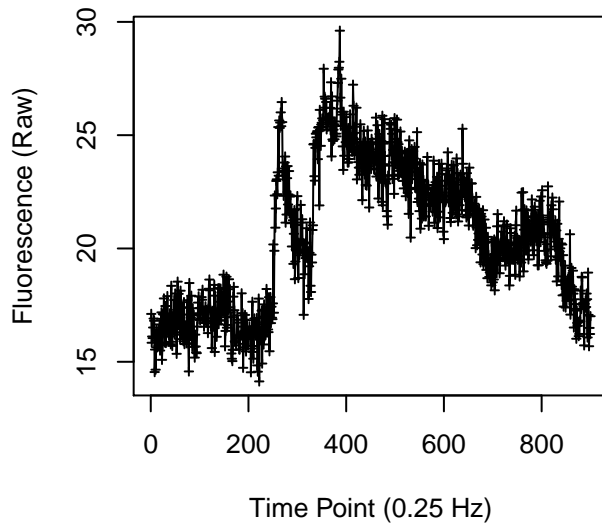

**Cell 1407**

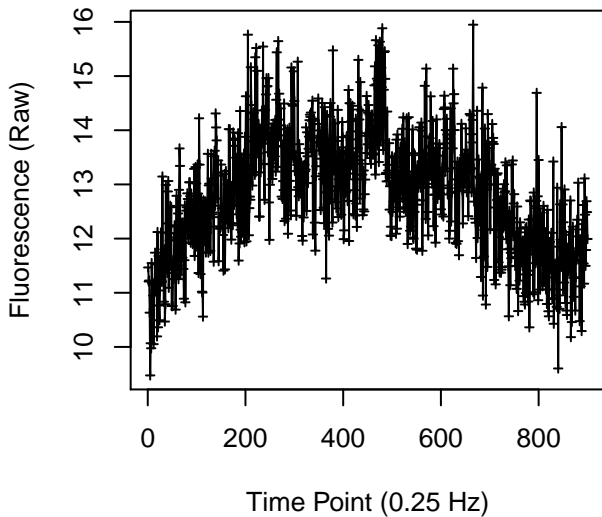

**Cell 1408**

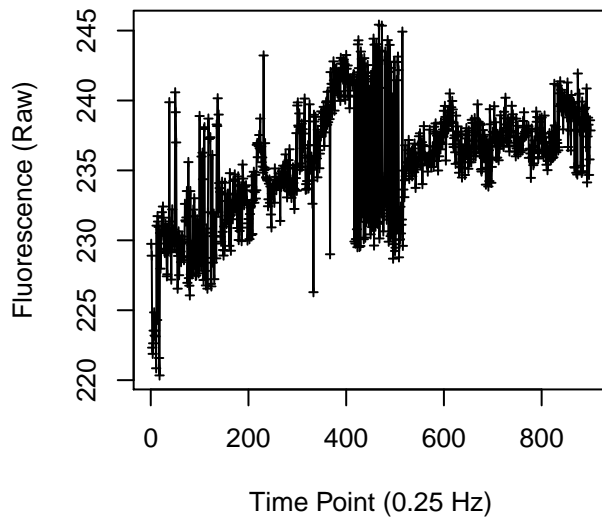

**Cell 1409**

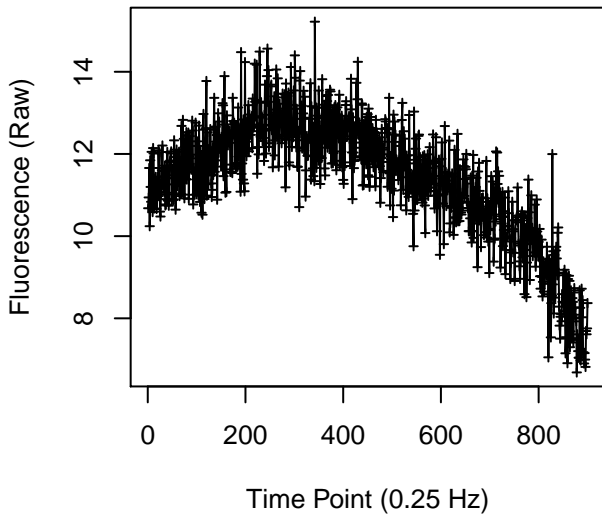

**Cell 1410**

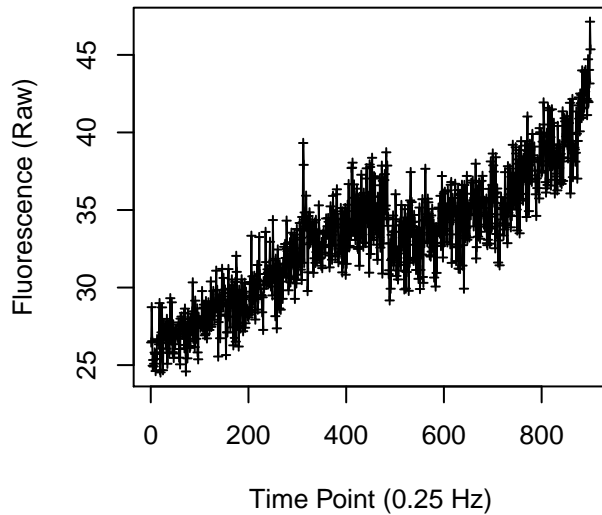

**Cell 1411**

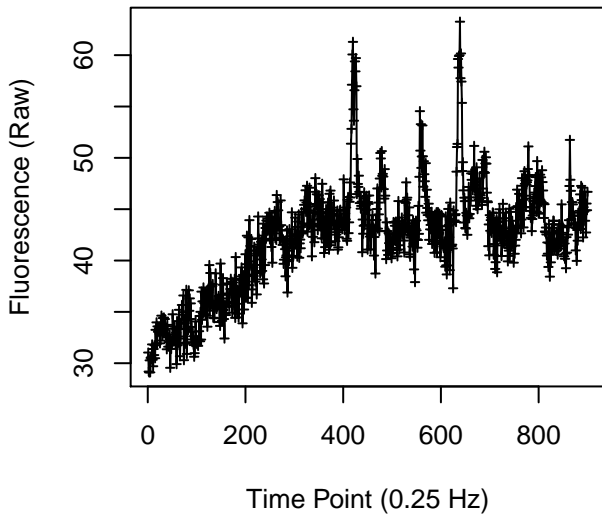

**Cell 1412**

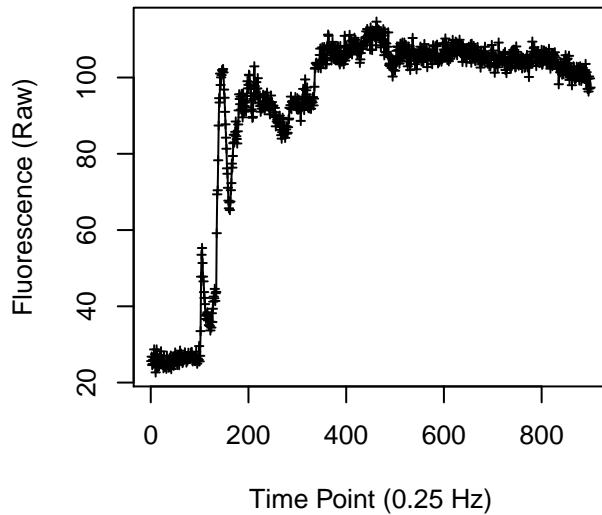

**Cell 1413**

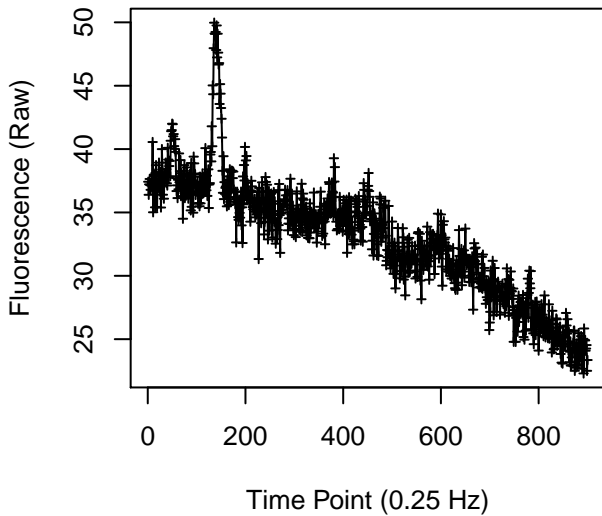

**Cell 1414**

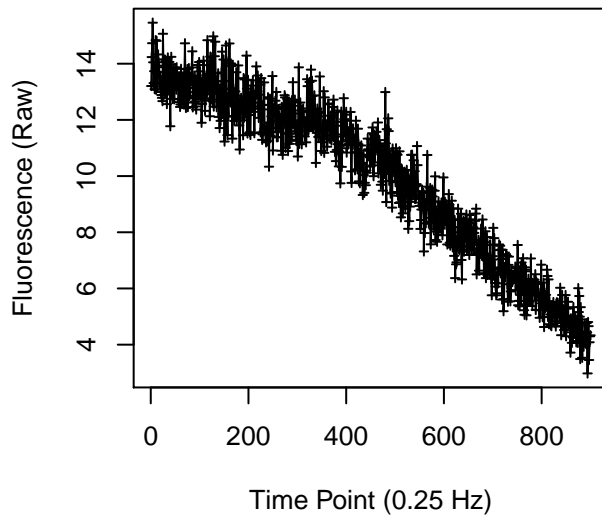

**Cell 1415**

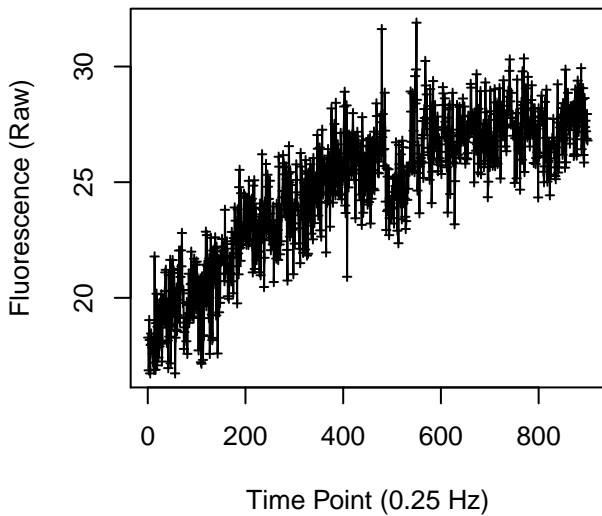

**Cell 1416**

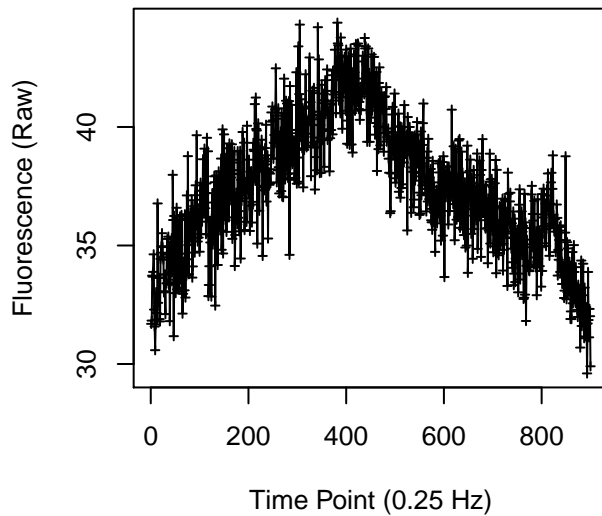



**Cell 1417**

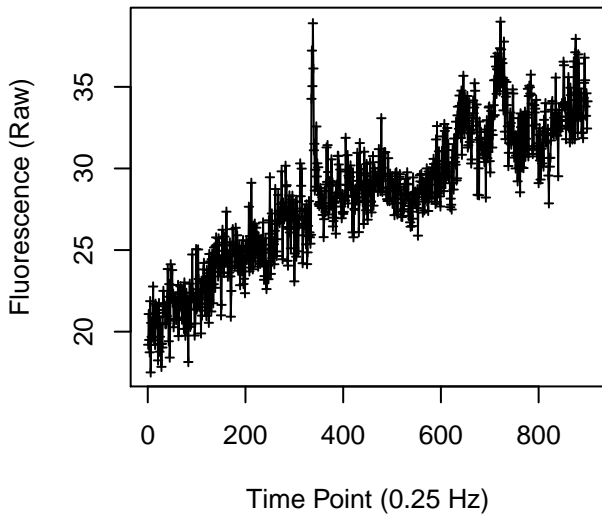

**Cell 1418**

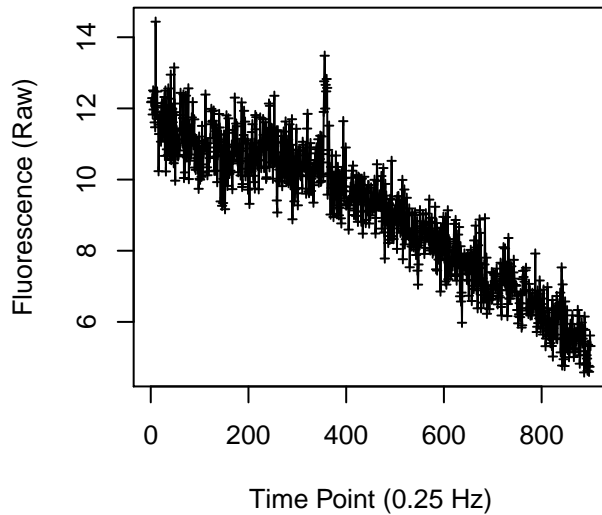

**Cell 1419**

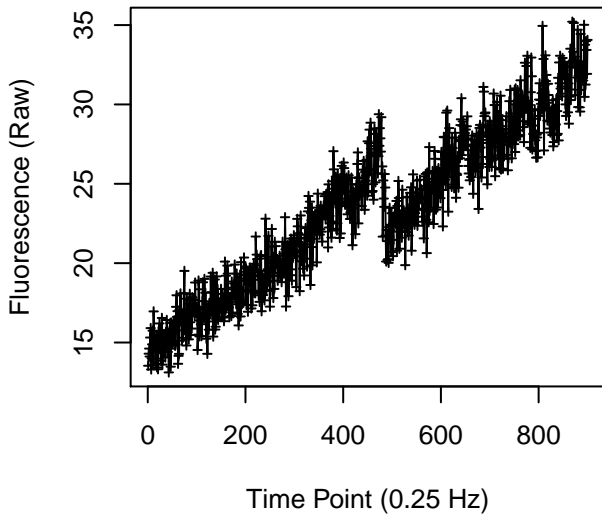

**Cell 1420**

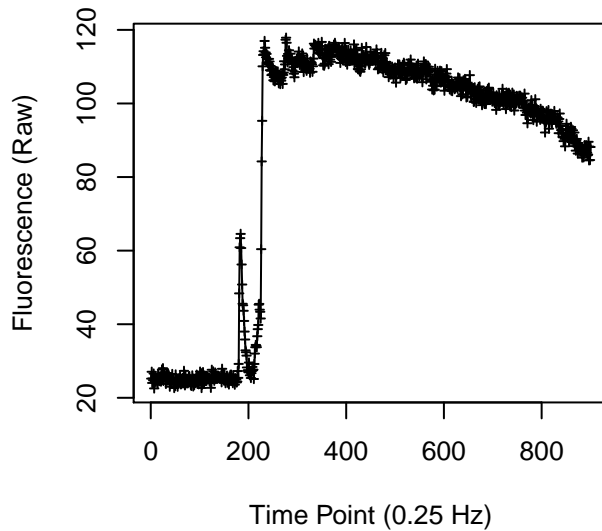

**Cell 1421**

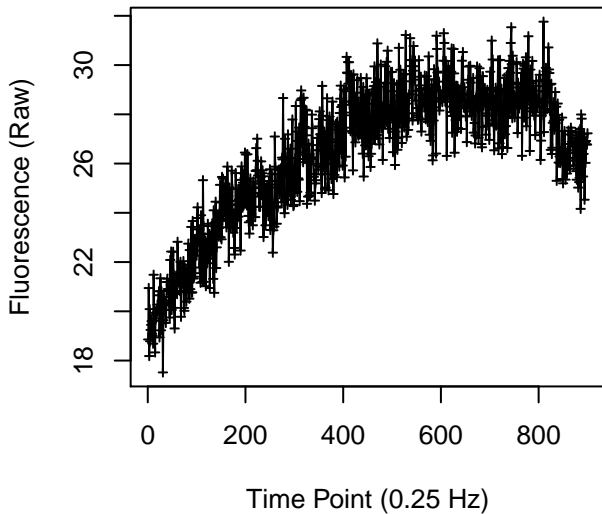

**Cell 1422**

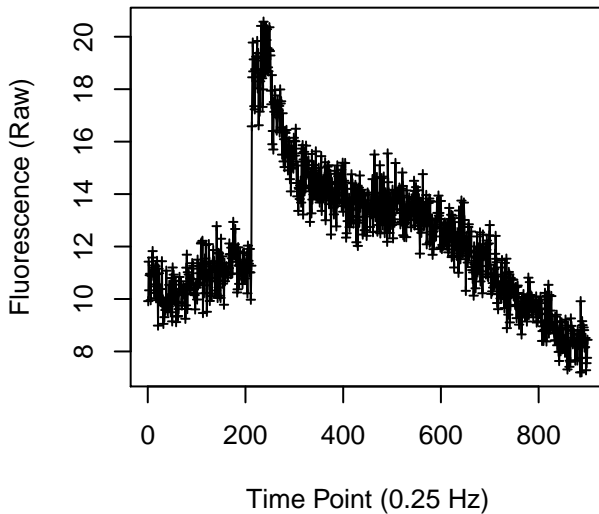

**Cell 1423**

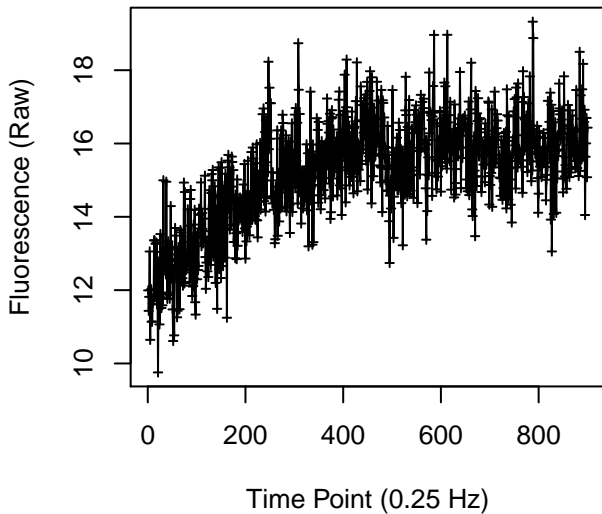

**Cell 1424**

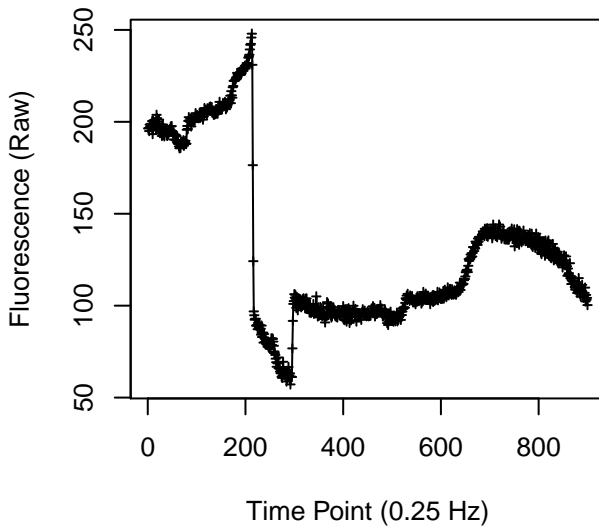

**Cell 1425**

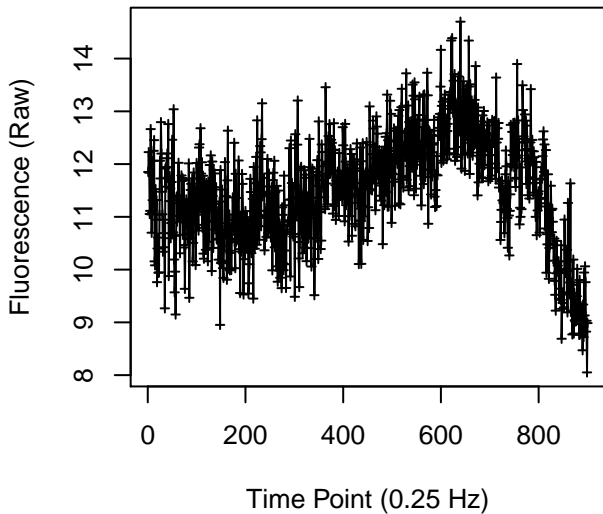

**Cell 1426**

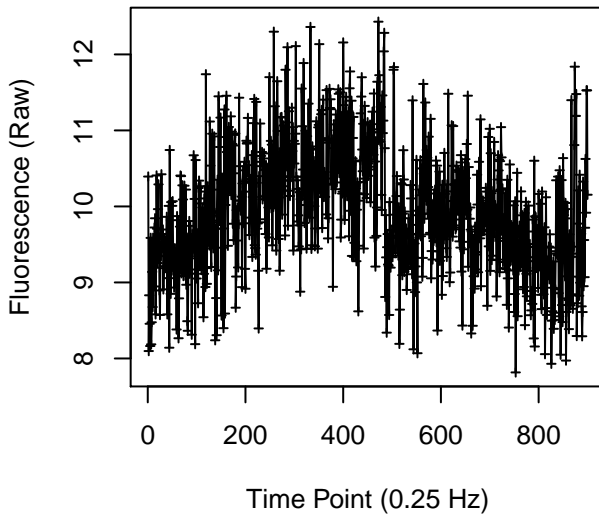

**Cell 1427**

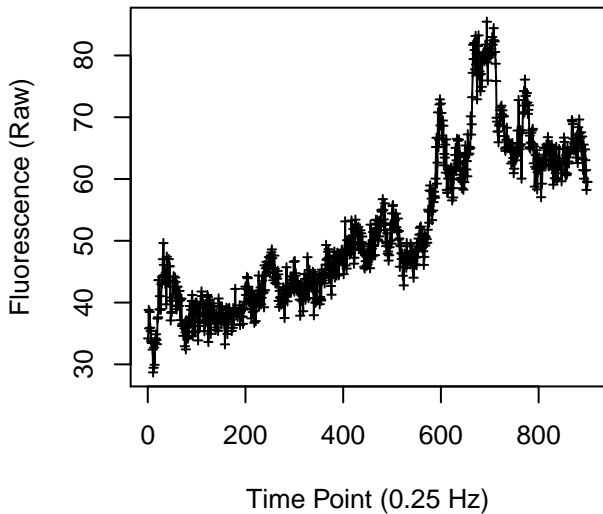

**Cell 1428**

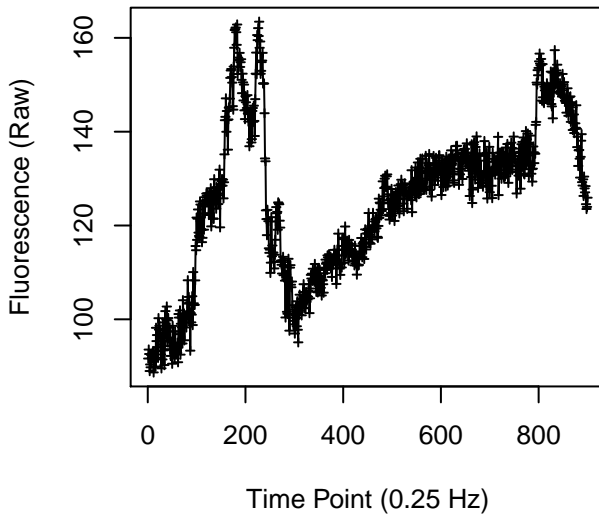

**Cell 1429**

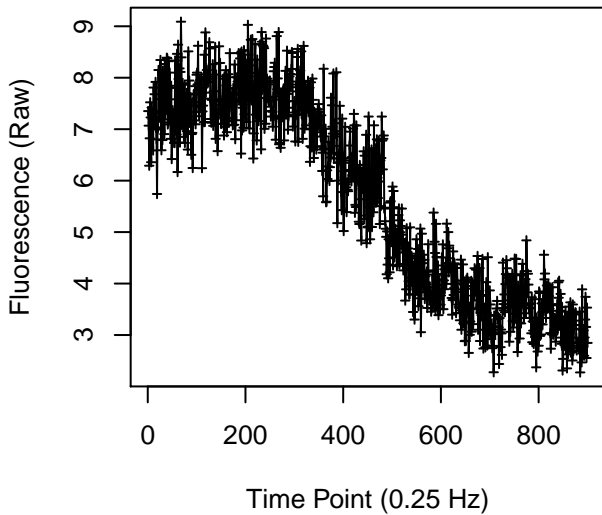

**Cell 1430**

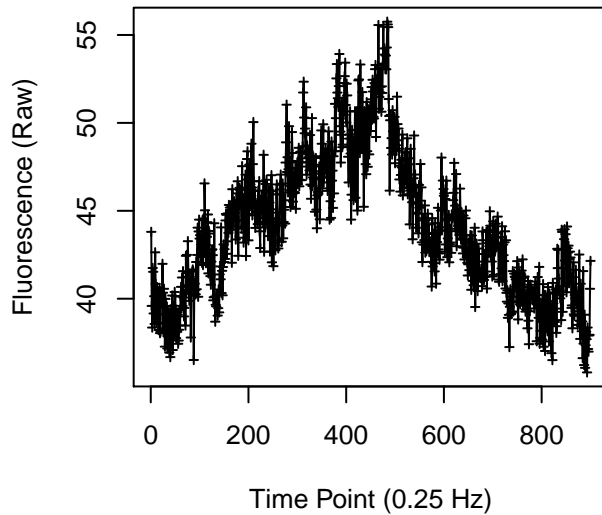

**Cell 1431**

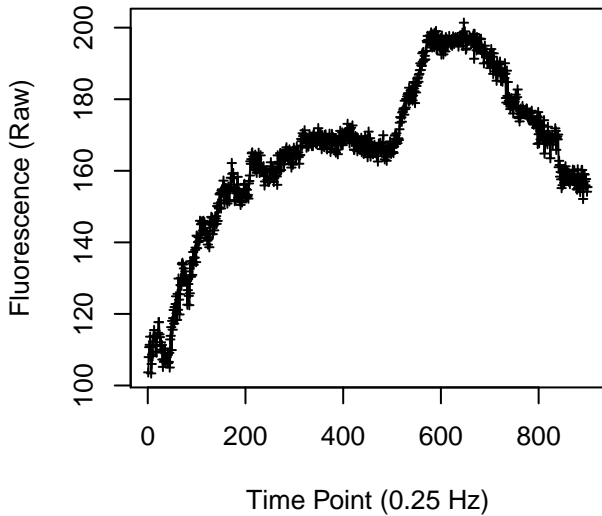

**Cell 1432**

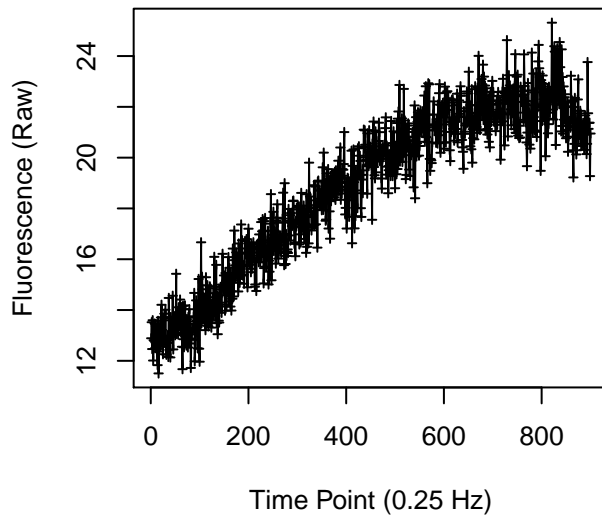

**Cell 1433**

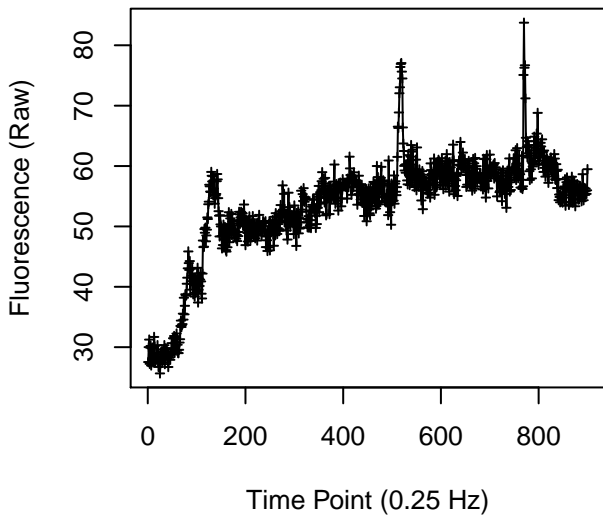

**Cell 1434**

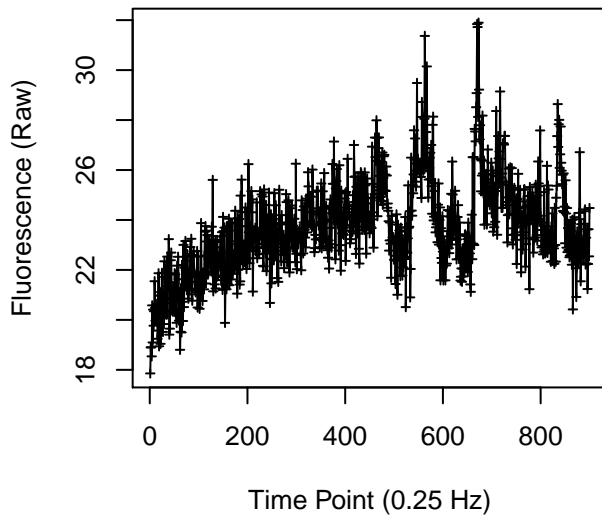

**Cell 1435**

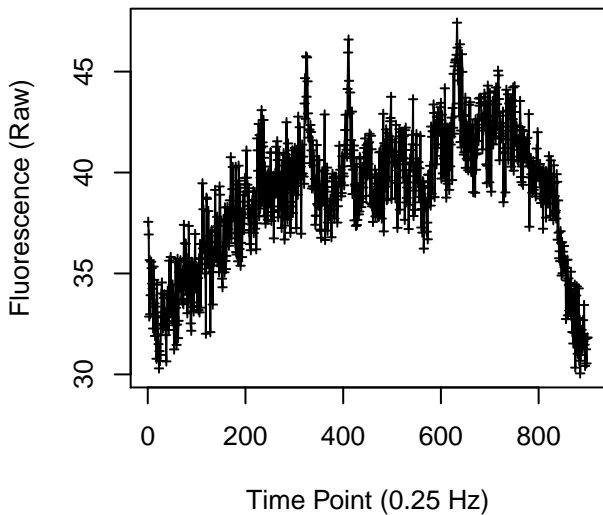

**Cell 1436**

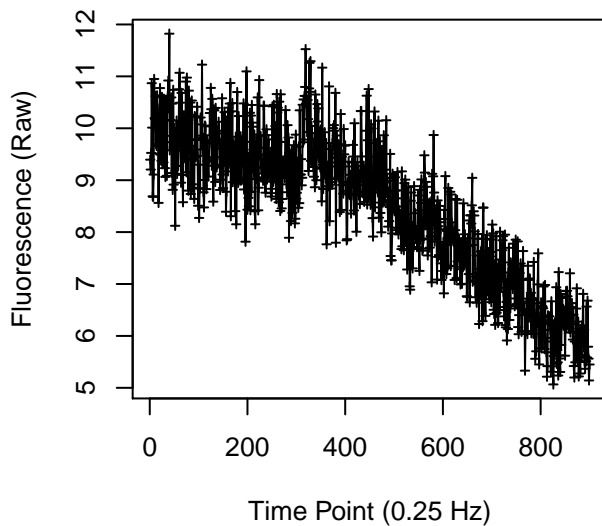

**Cell 1437**

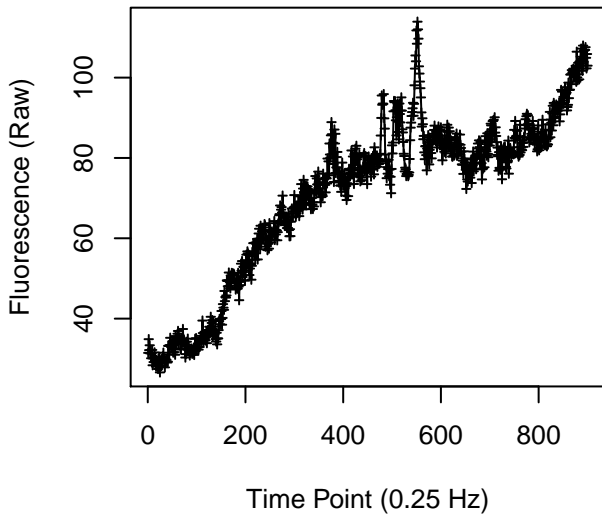

**Cell 1438**

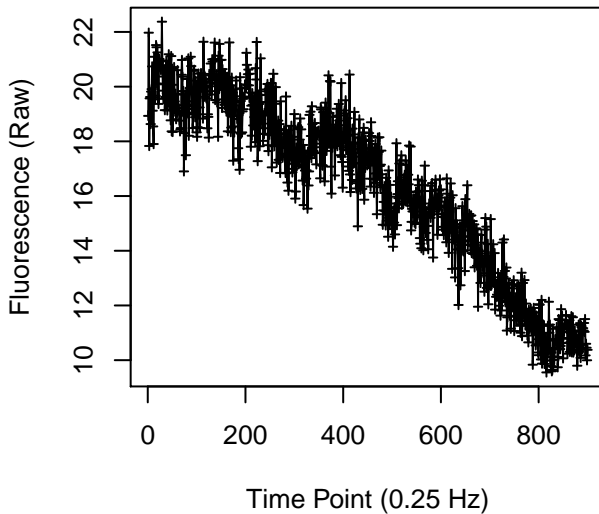

**Cell 1439**

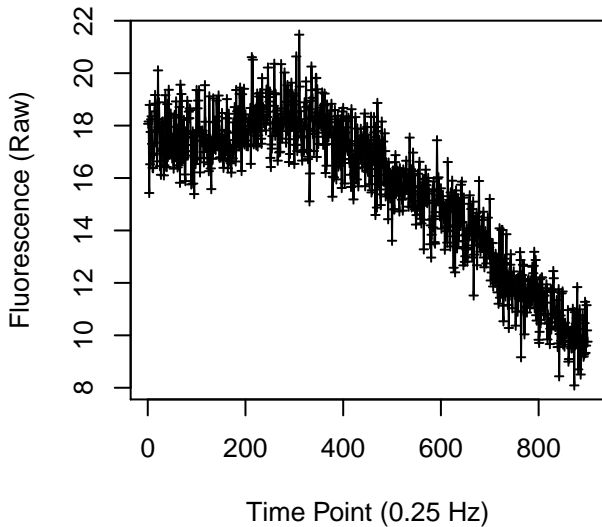

**Cell 1440**

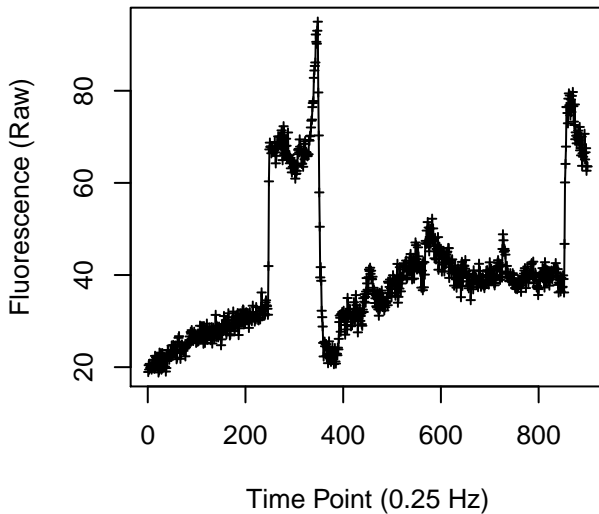

**Cell 1441**

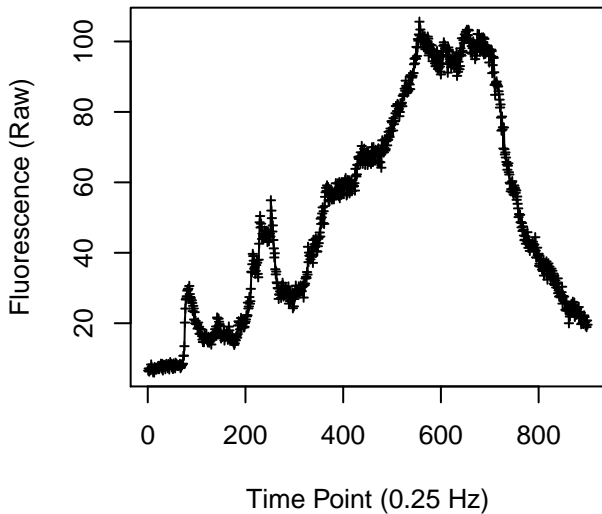

**Cell 1442**

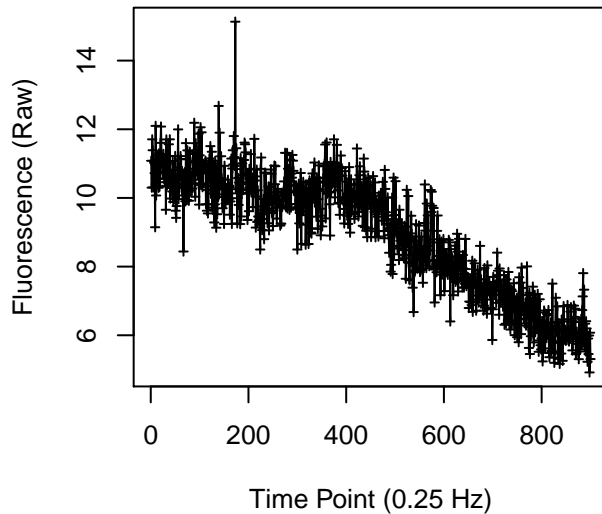

**Cell 1443**

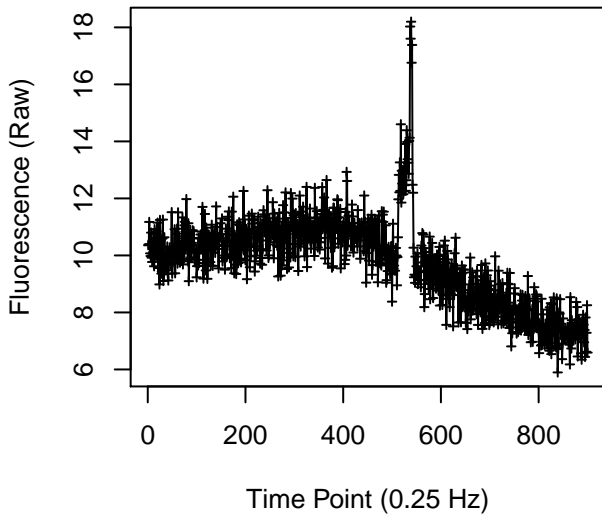

**Cell 1444**

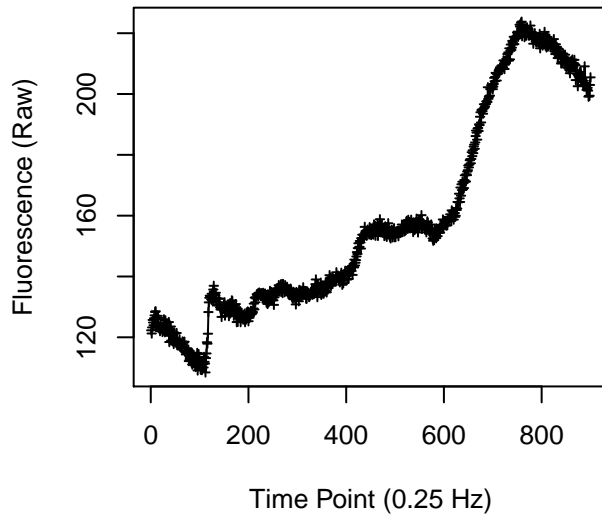

**Cell 1445**

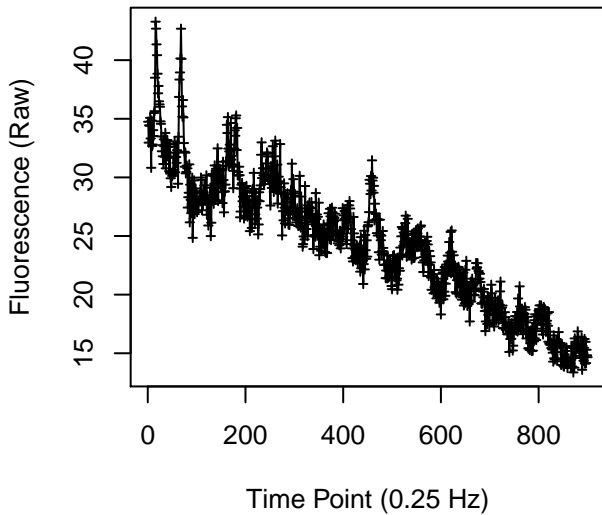

**Cell 1446**

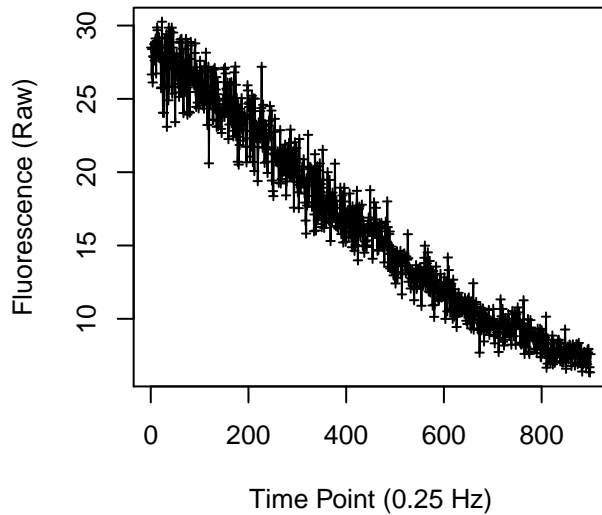

**Cell 1447**

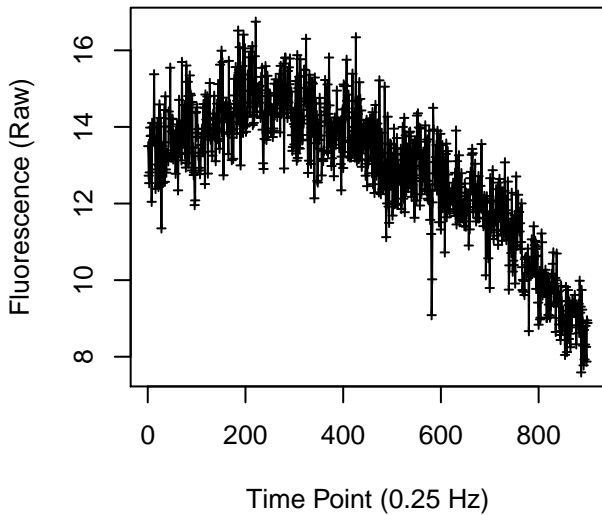

**Cell 1448**

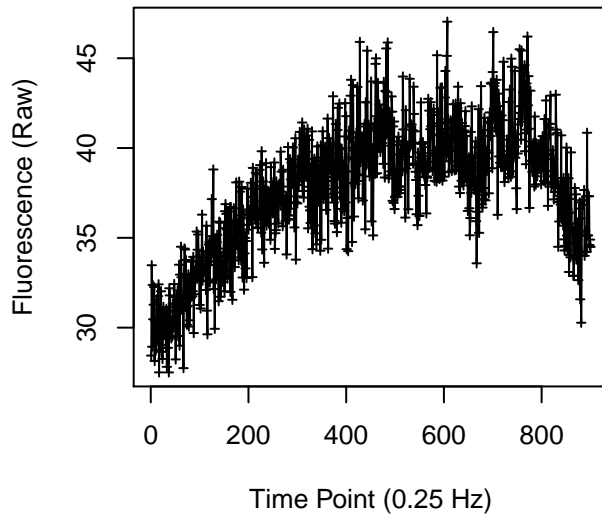



**Cell 1449**

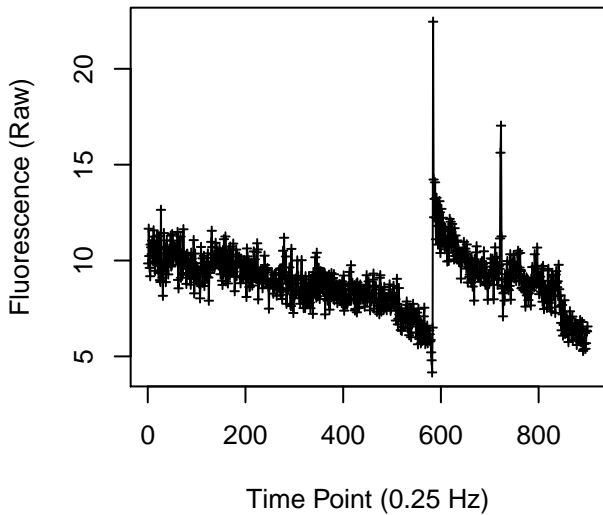

**Cell 1450**

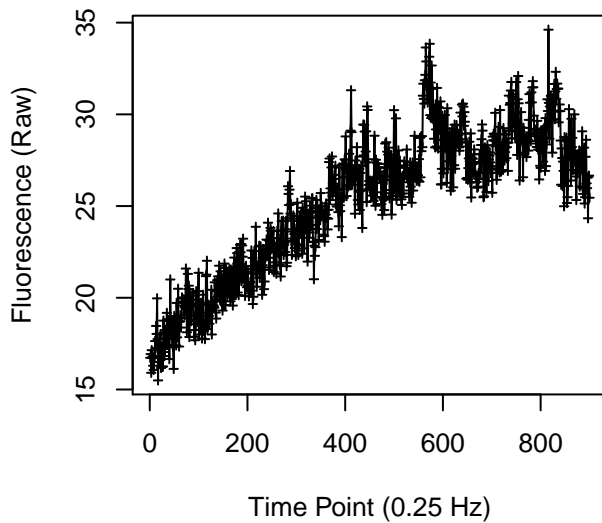

**Cell 1451**

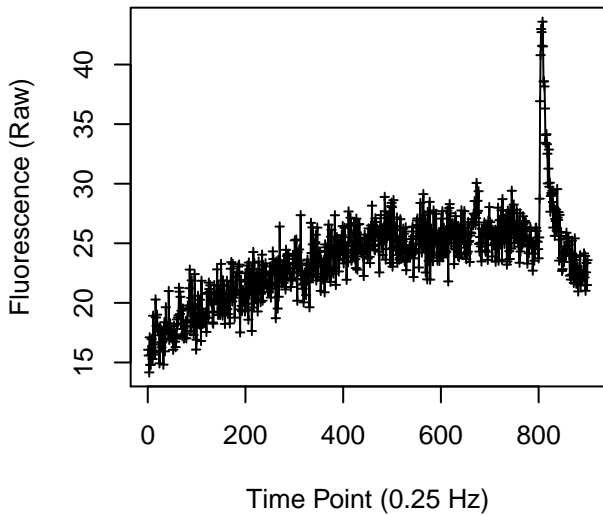

**Cell 1452**

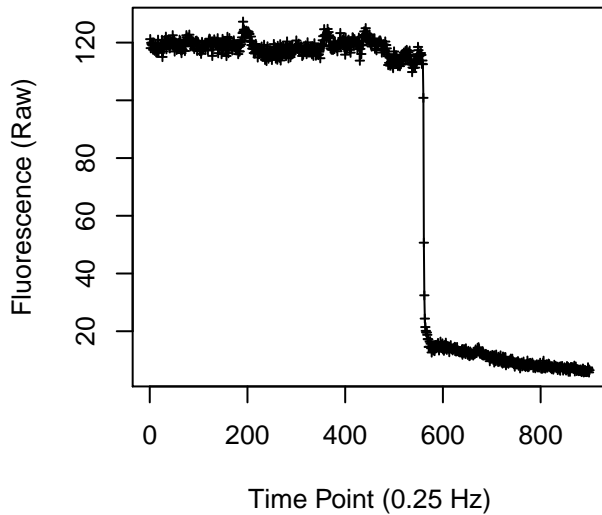

**Cell 1453**

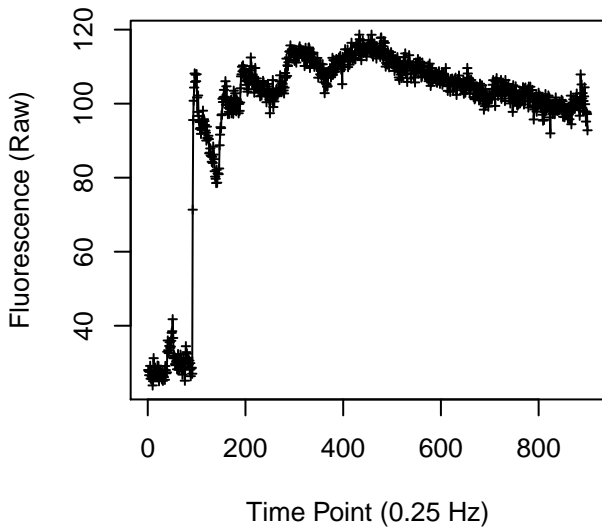

**Cell 1454**

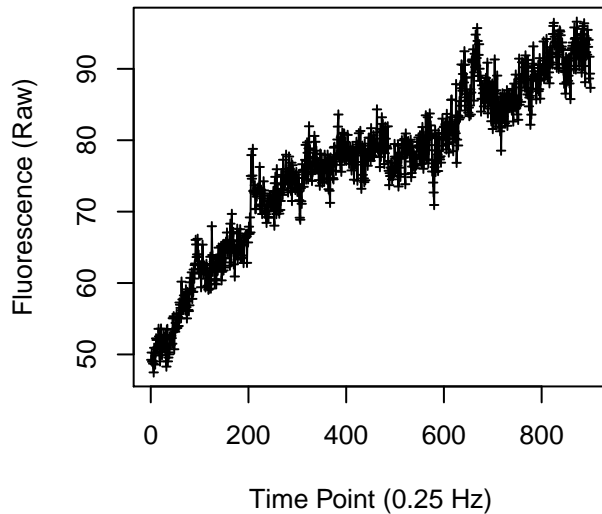

**Cell 1455**

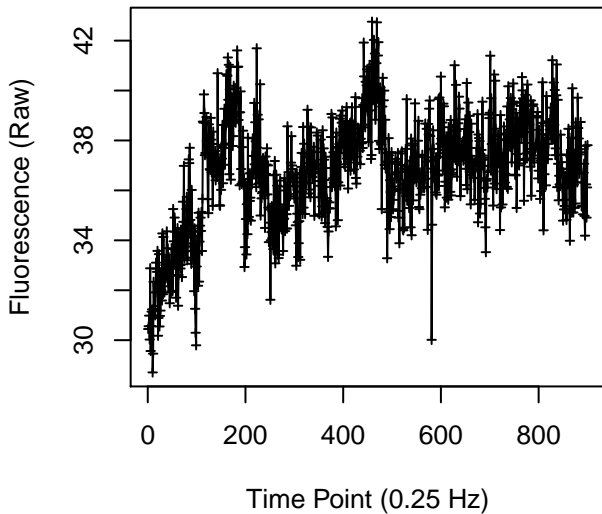

**Cell 1456**

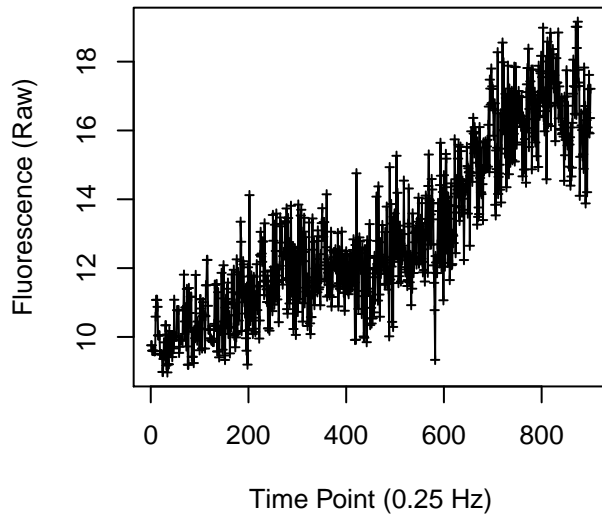

**Cell 1457**

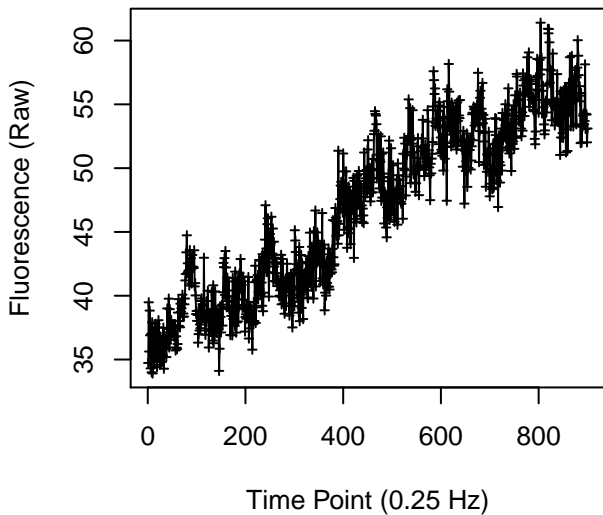

**Cell 1458**

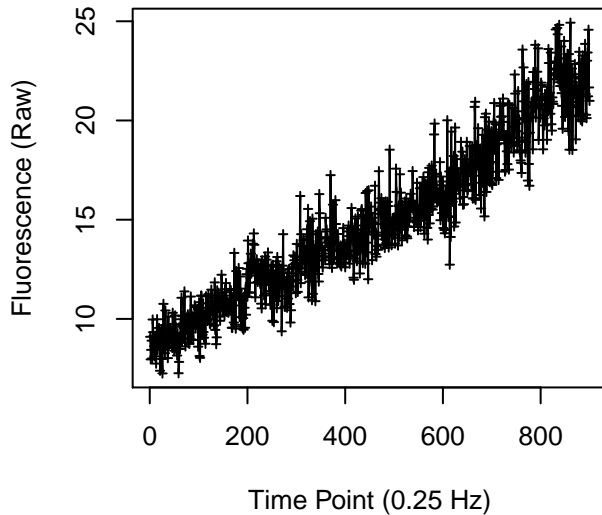

**Cell 1459**

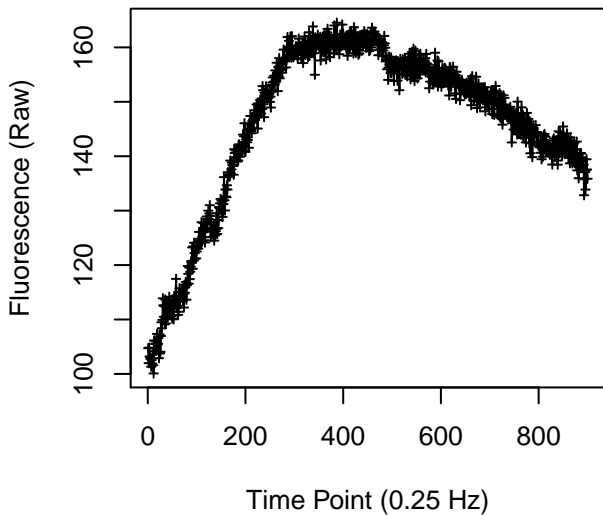

**Cell 1460**

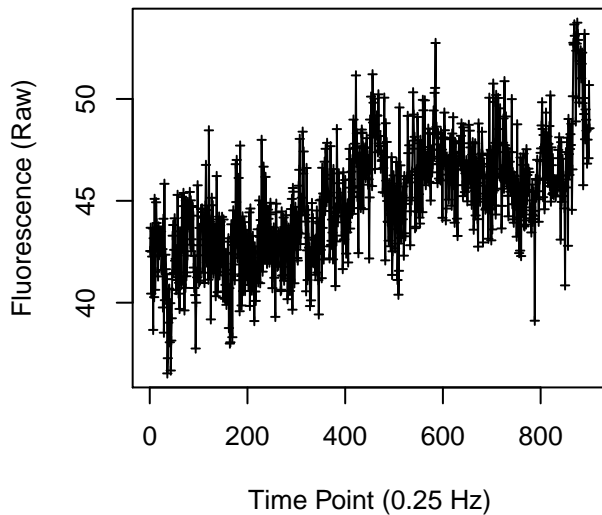

**Cell 1461**

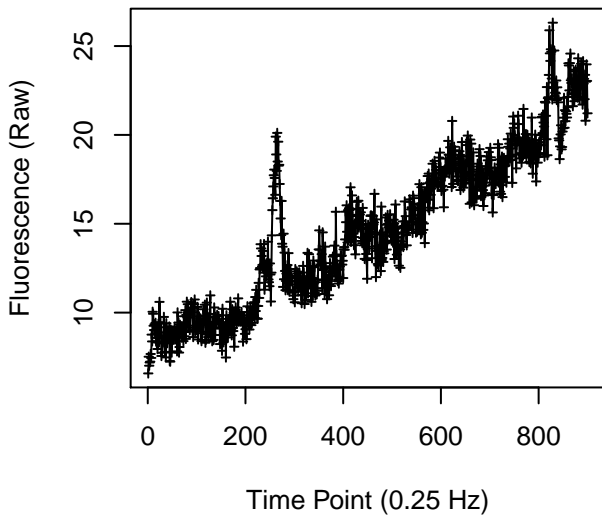

**Cell 1462**

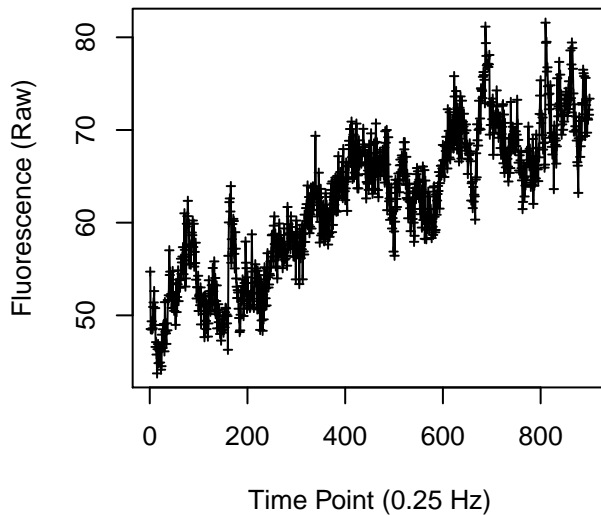

**Cell 1463**

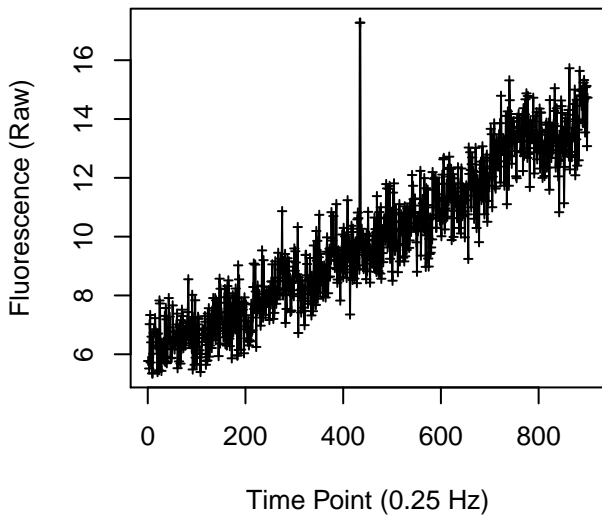

**Cell 1464**

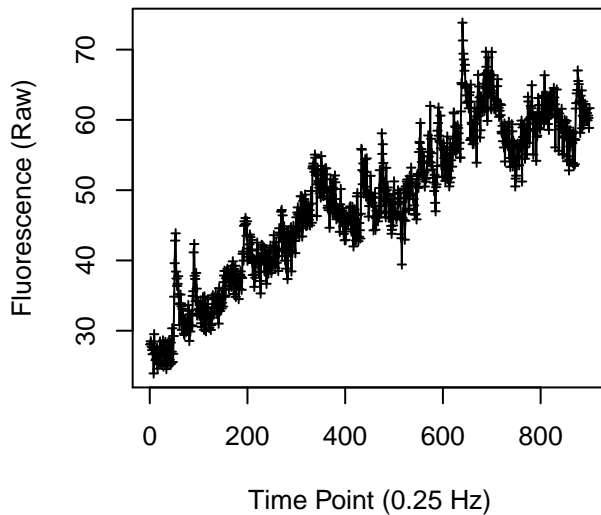

**Cell 1465**

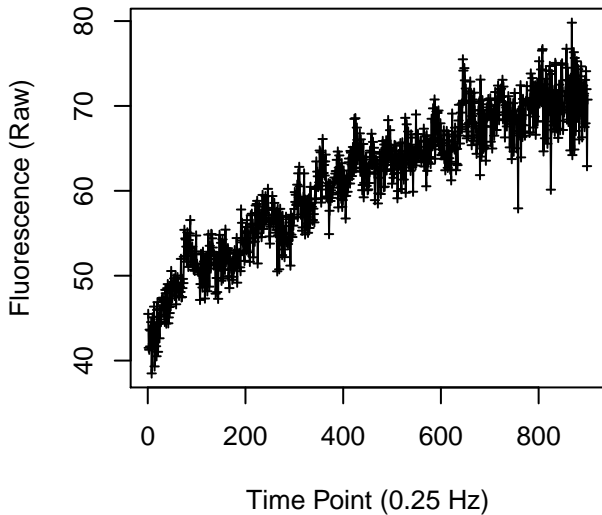

**Cell 1466**

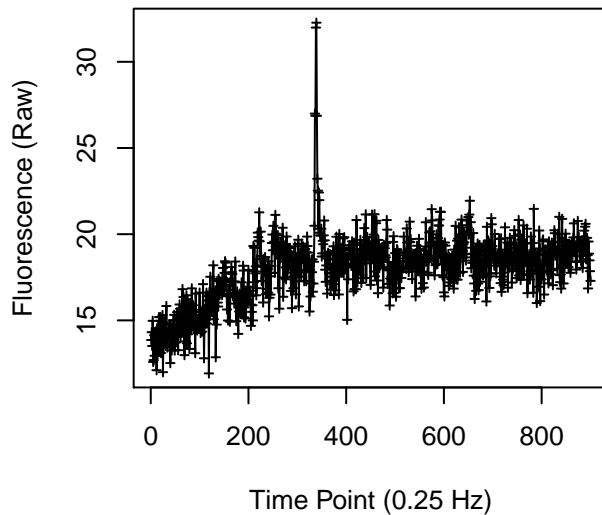

**Cell 1467**

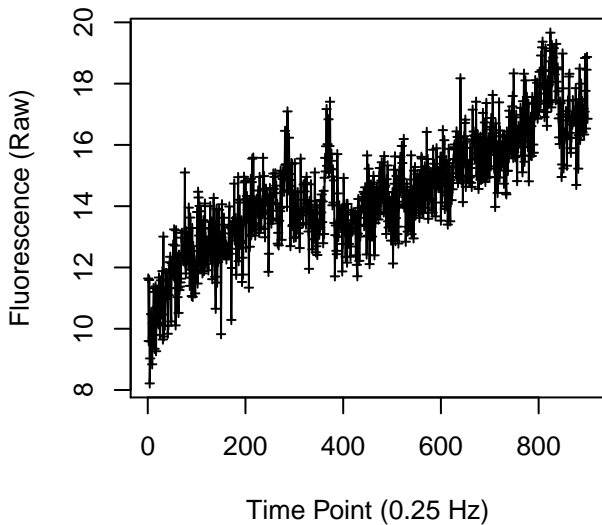

**Cell 1468**

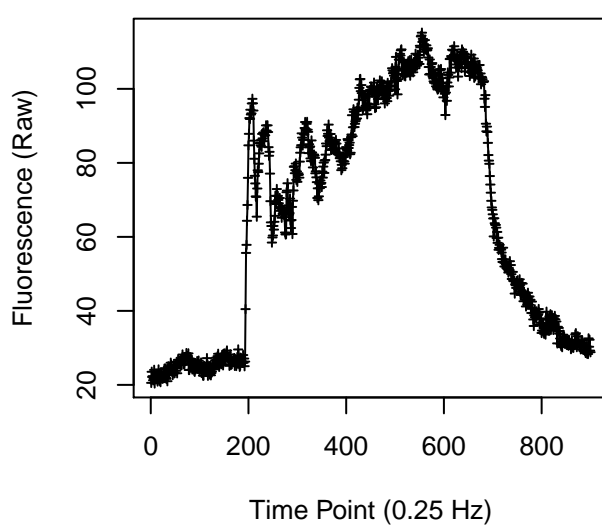

**Cell 1469**

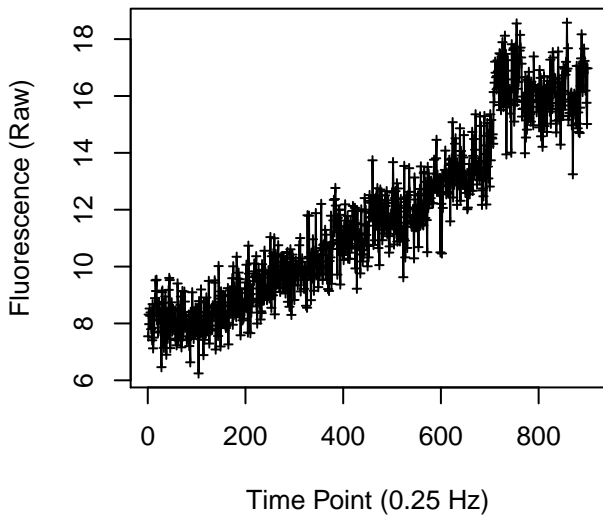

**Cell 1470**

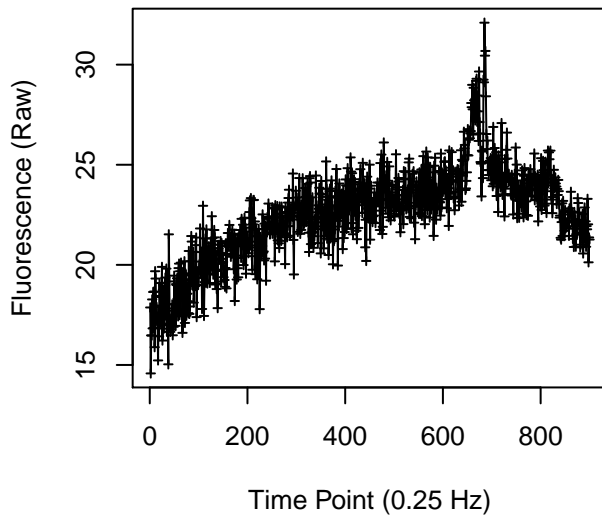

**Cell 1471**

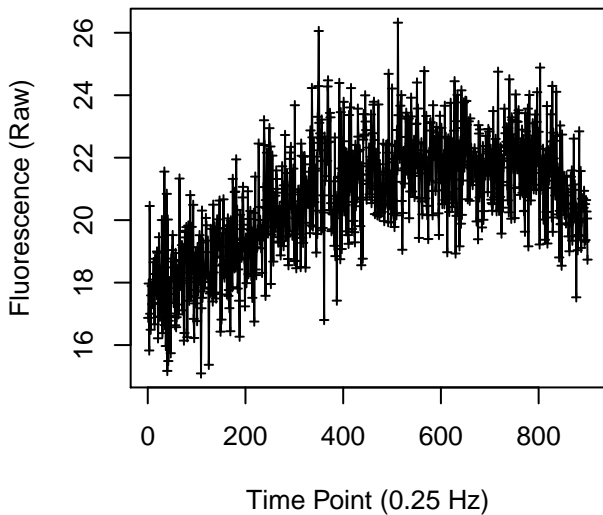

**Cell 1472**

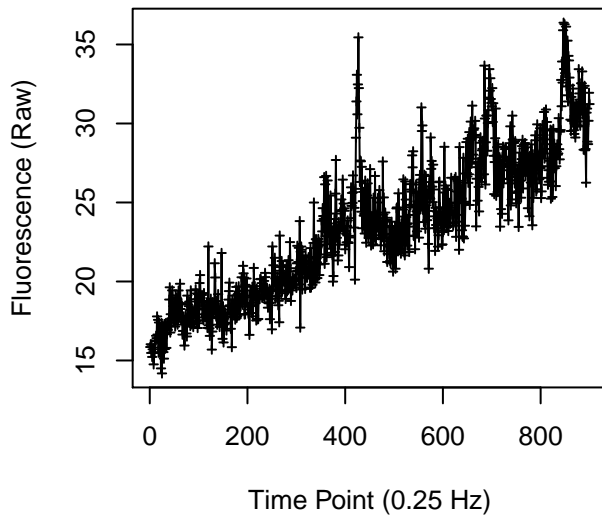

**Cell 1473**

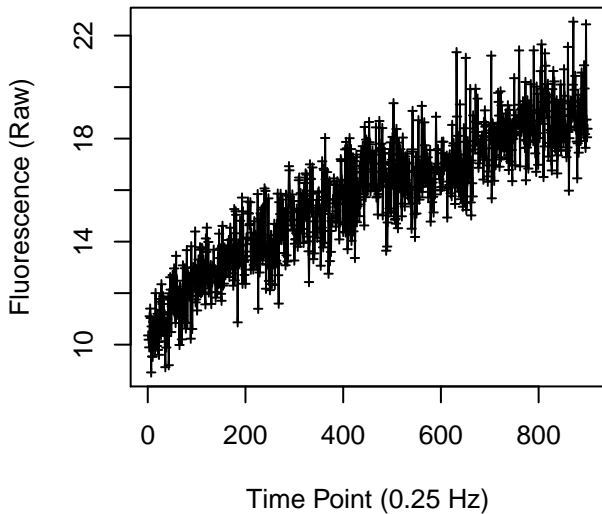

**Cell 1474**

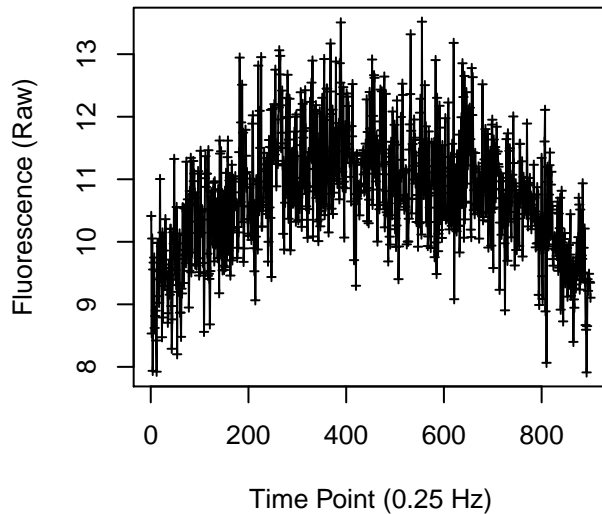

**Cell 1475**

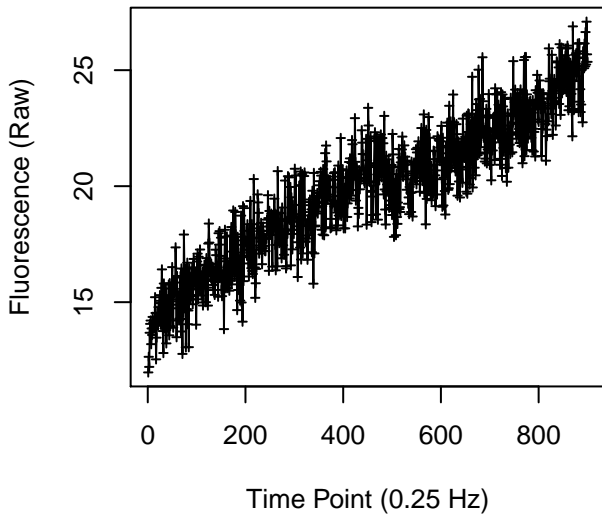

**Cell 1476**

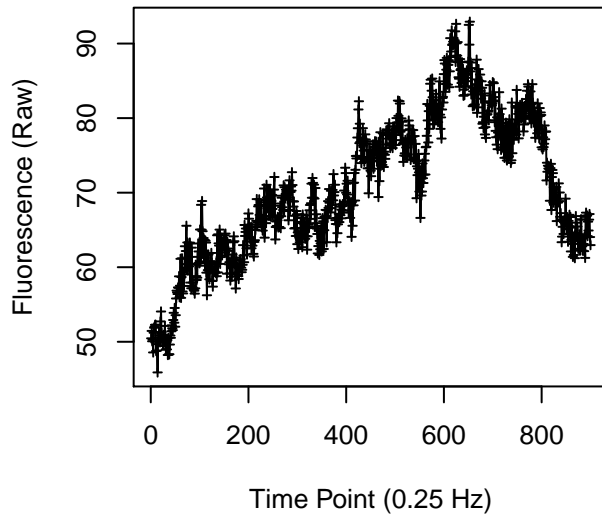

**Cell 1477**

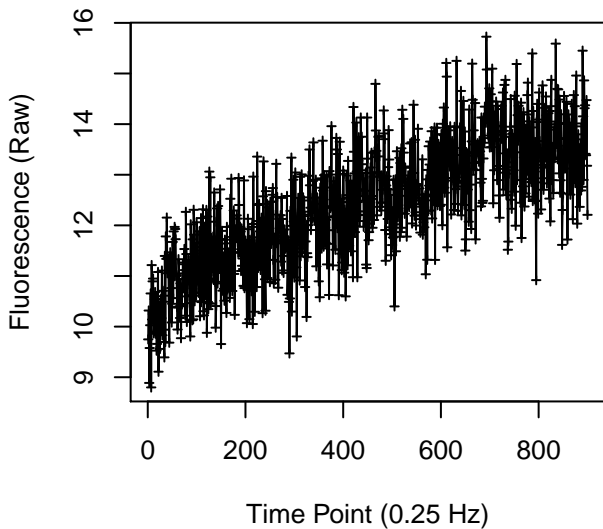

**Cell 1478**

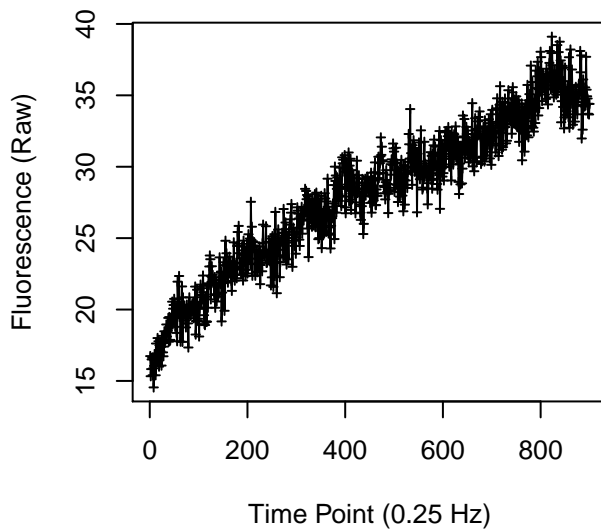

**Cell 1479**

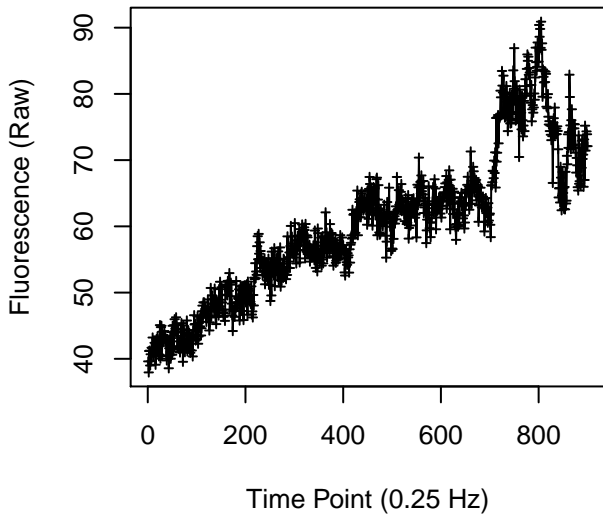

**Cell 1480**

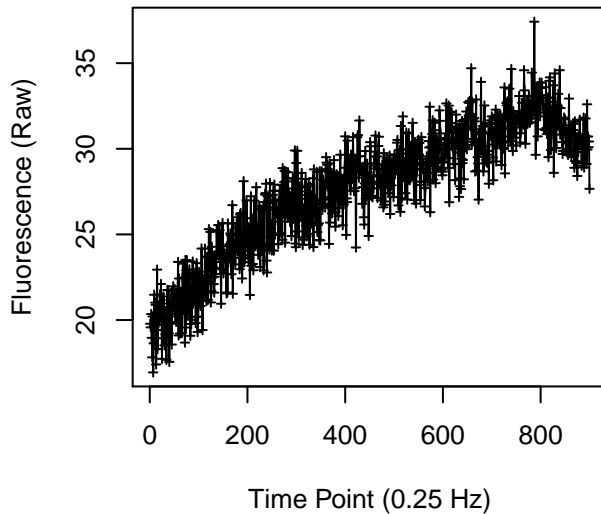



**Cell 1481**

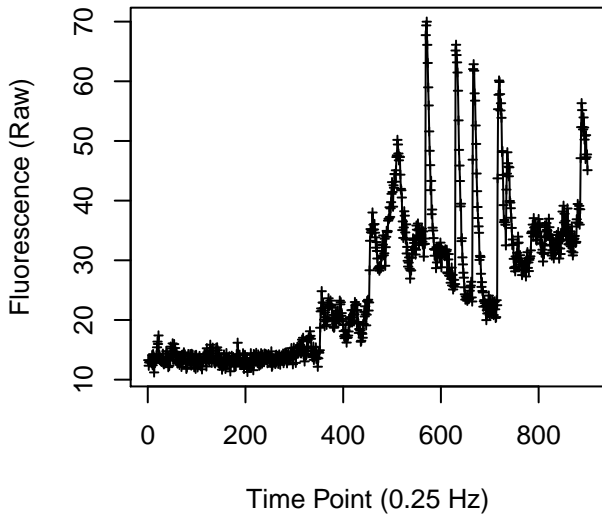

**Cell 1482**

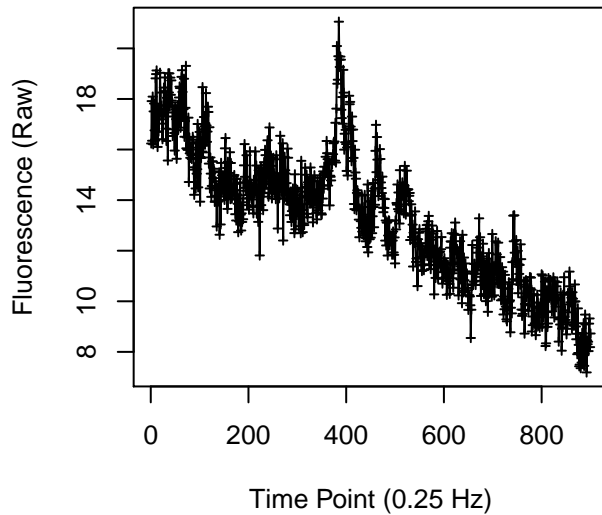

**Cell 1483**

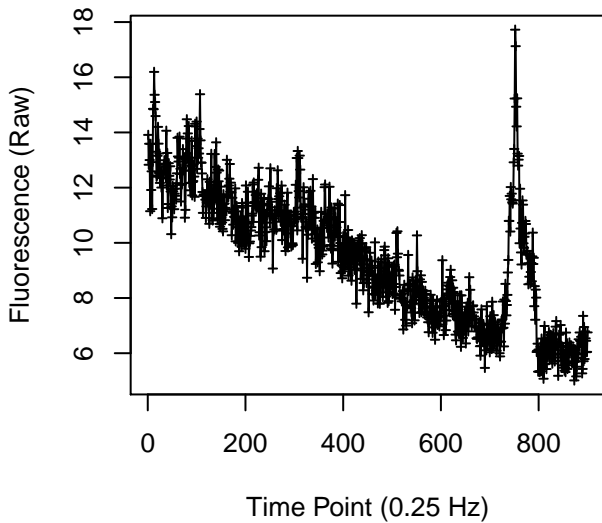

**Cell 1484**

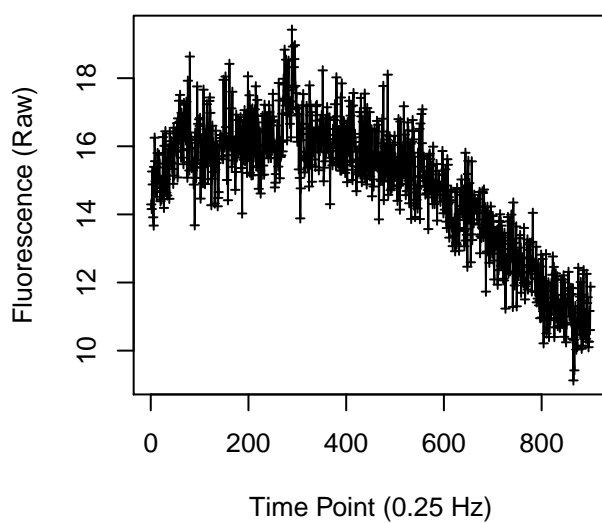

**Cell 1485**

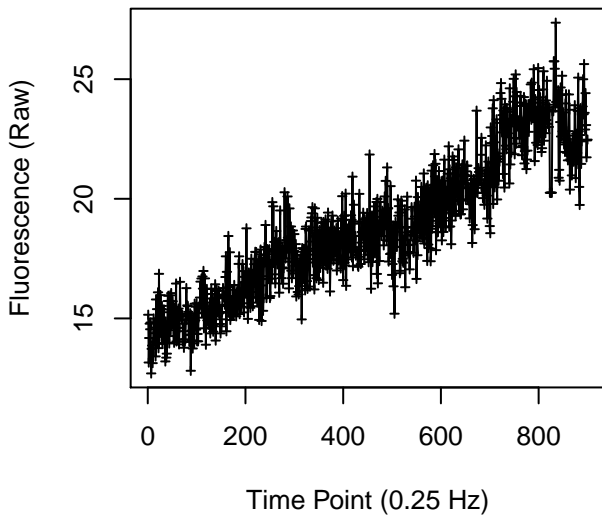

**Cell 1486**

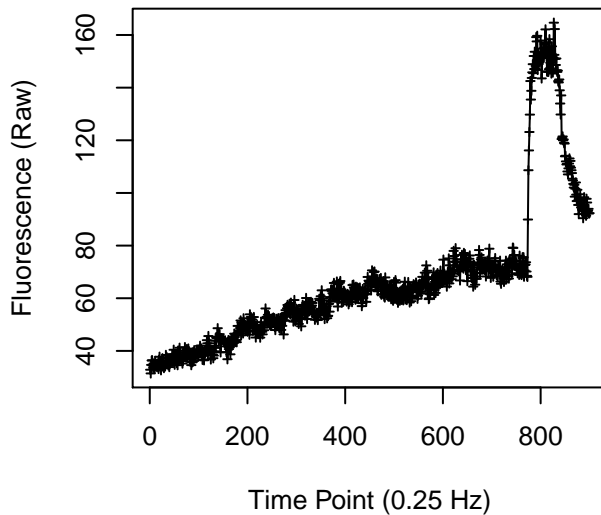

**Cell 1487**

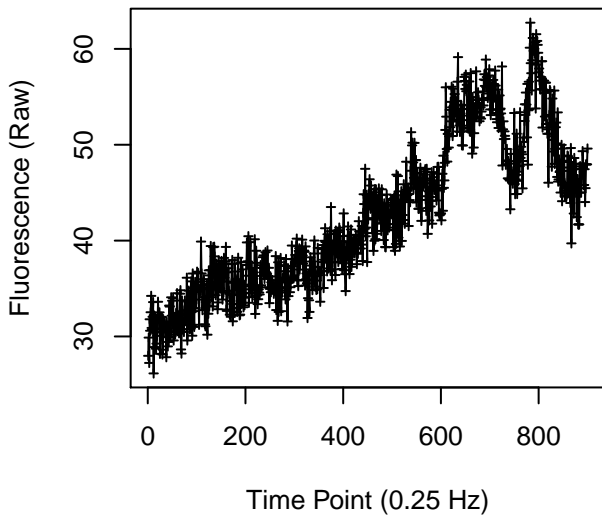

**Cell 1488**

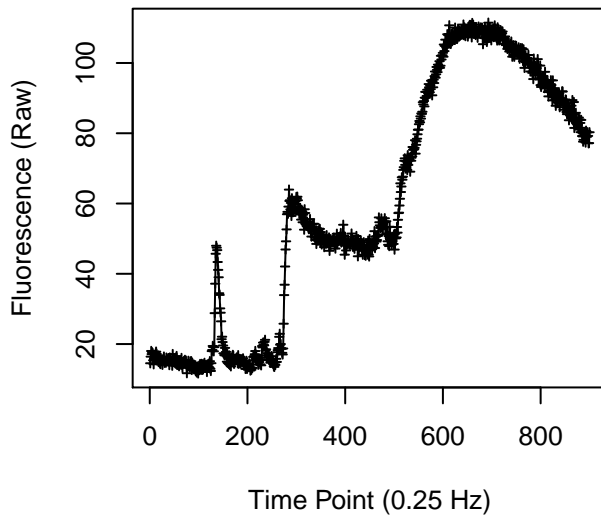

**Cell 1489**

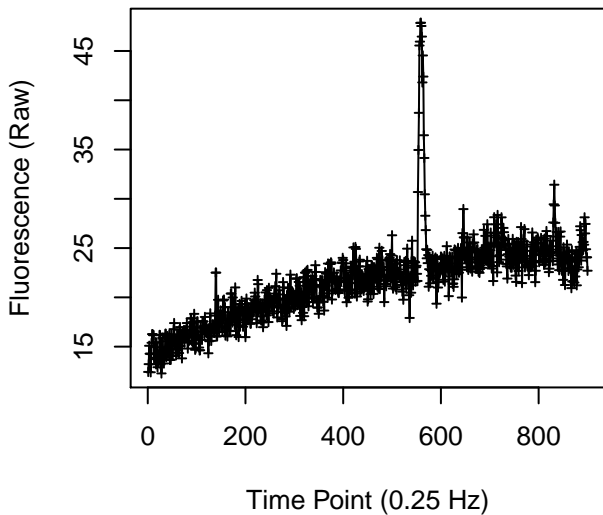

**Cell 1490**

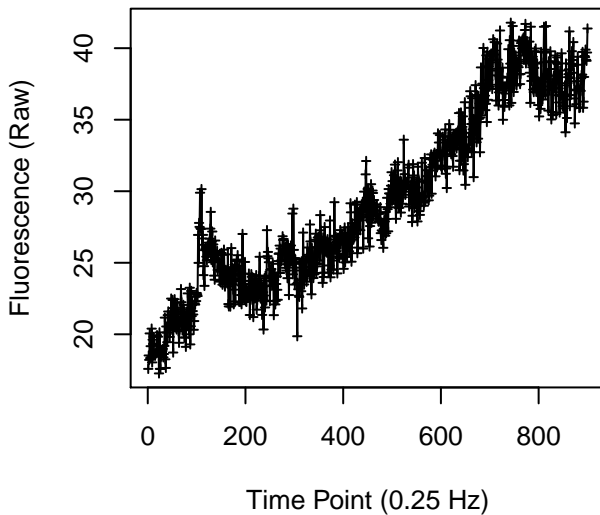

**Cell 1491**

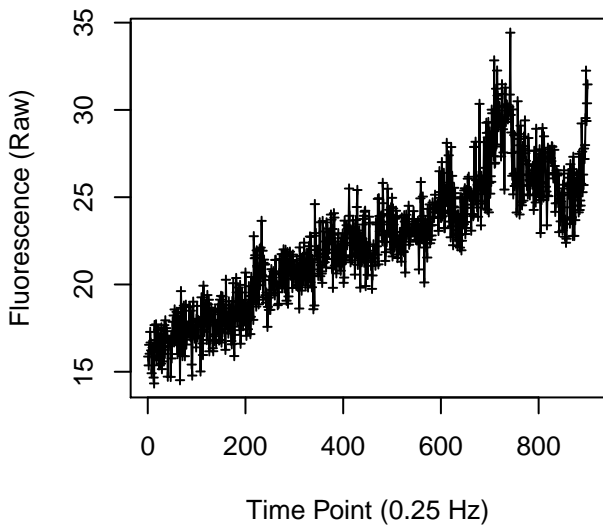

**Cell 1492**

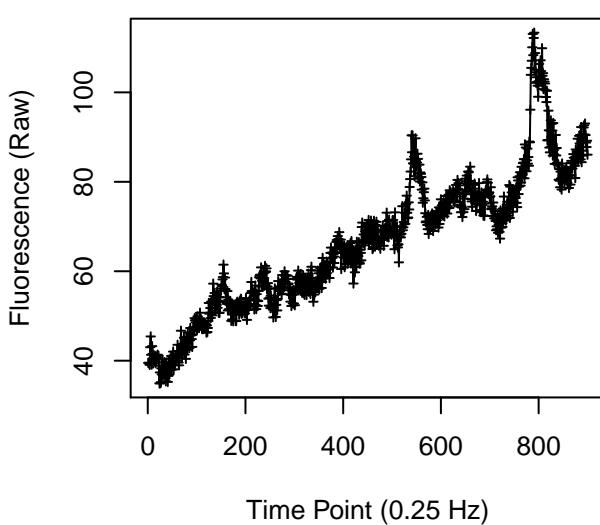

**Cell 1493**

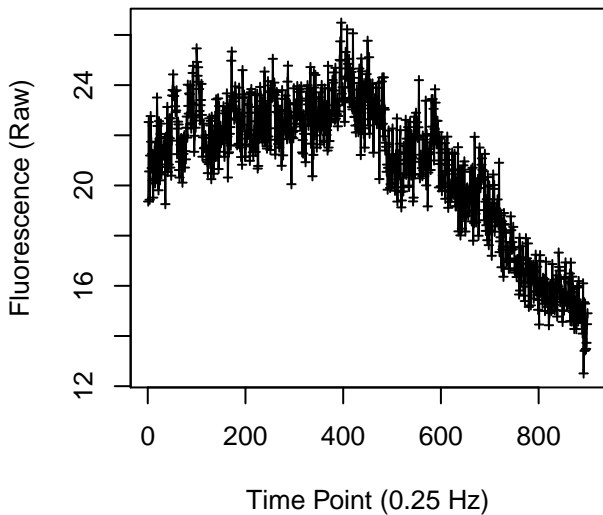

**Cell 1494**

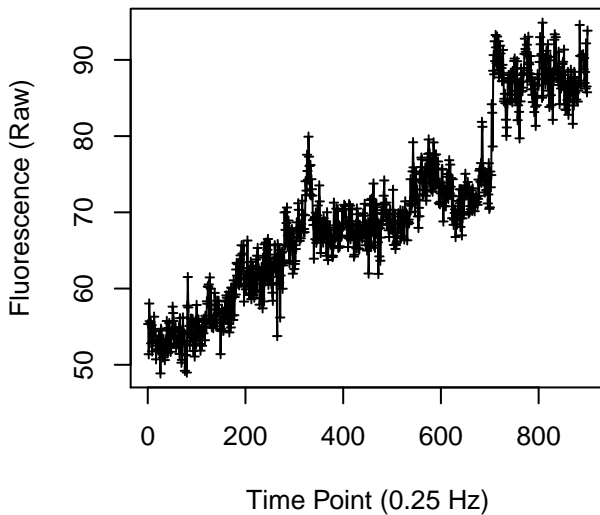

**Cell 1495**

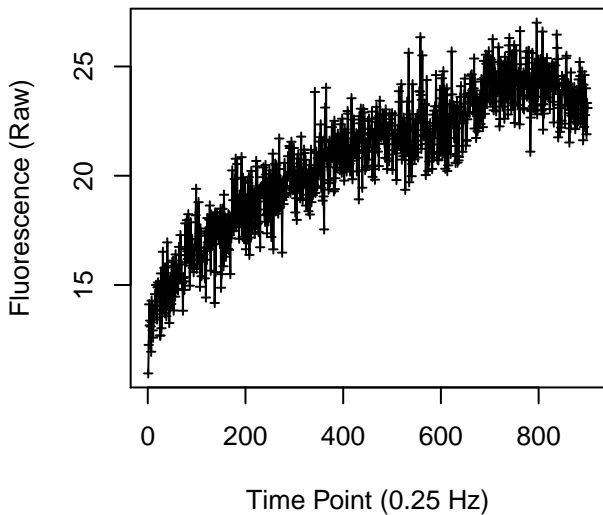

**Cell 1496**

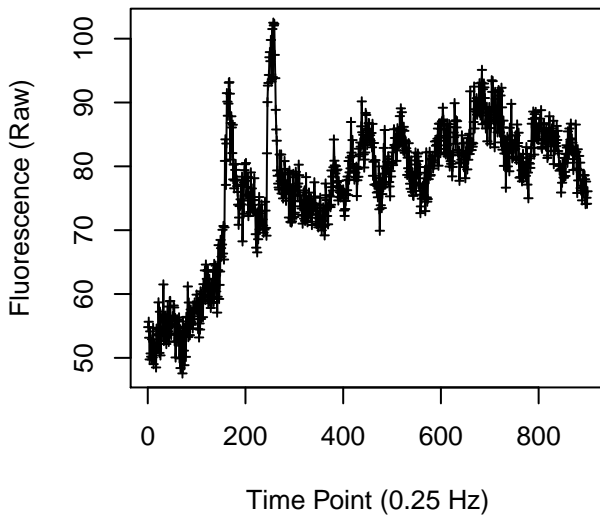

**Cell 1497**

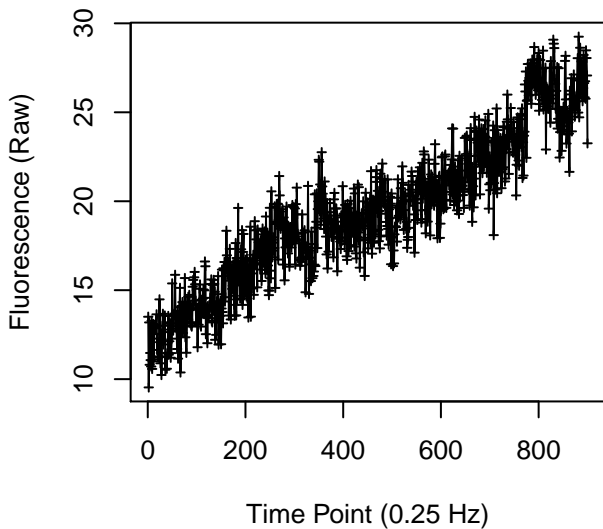

**Cell 1498**

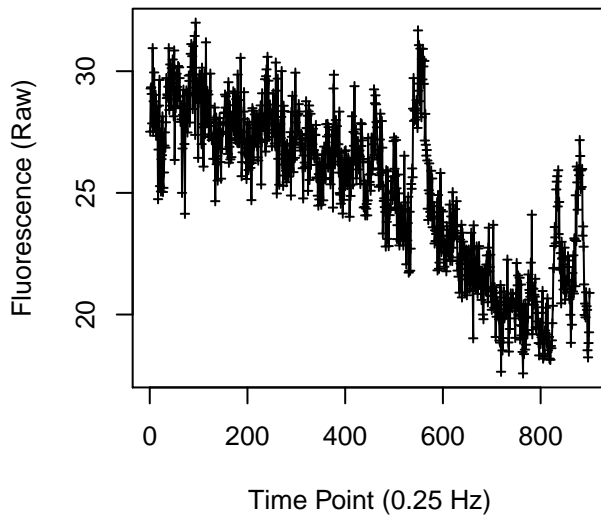

**Cell 1499**

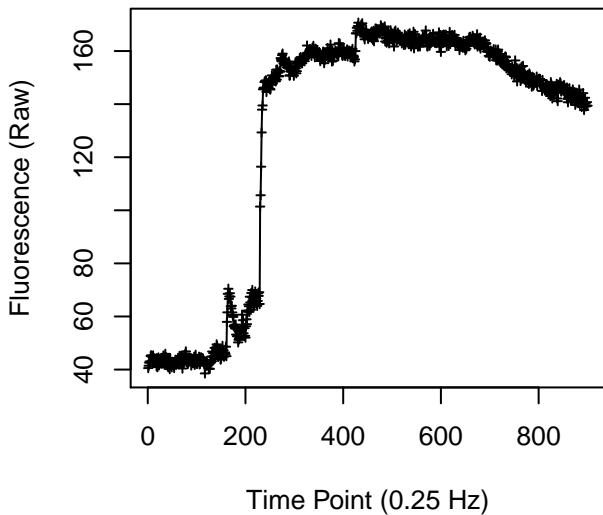

**Cell 1500**

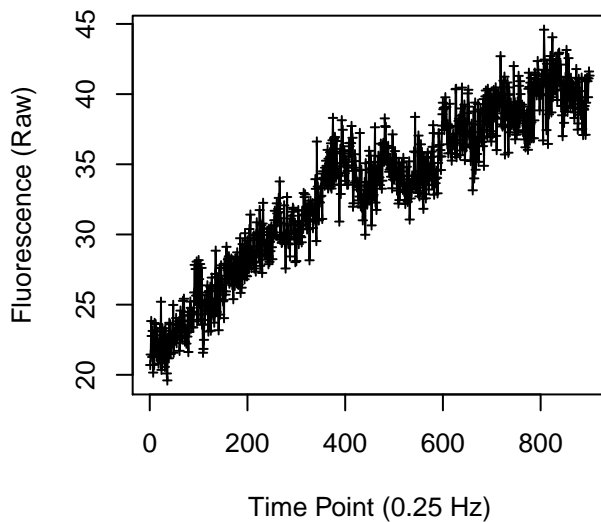

**Cell 1501**

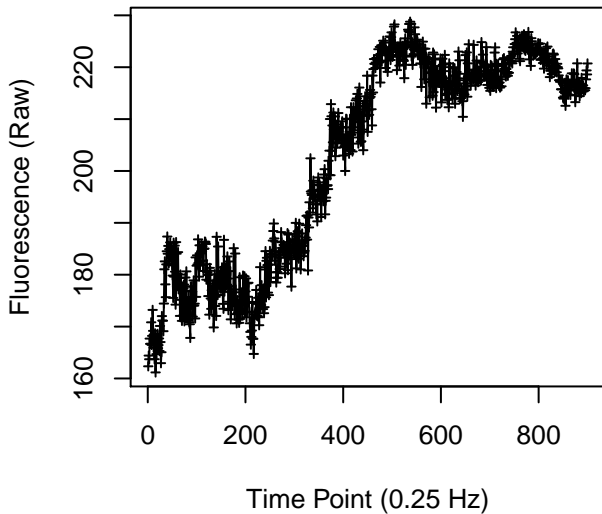

**Cell 1502**

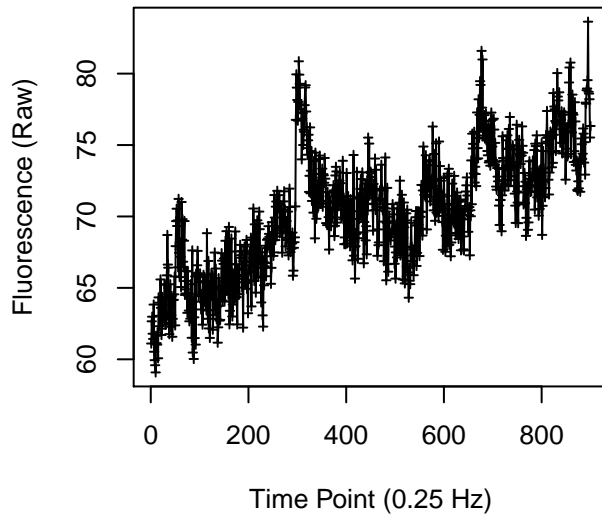

**Cell 1503**

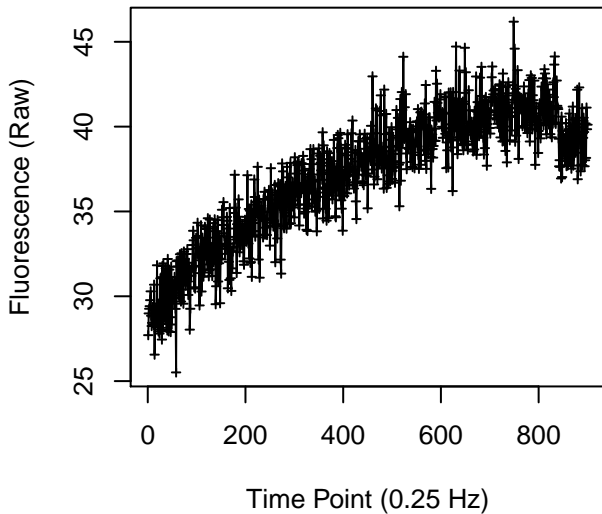

**Cell 1504**

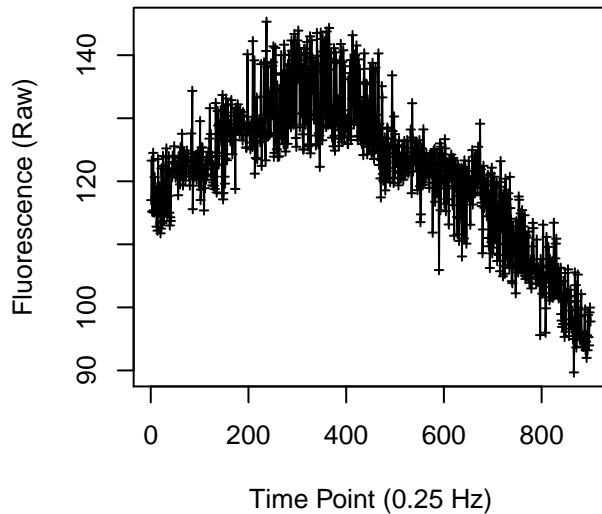

**Cell 1505**

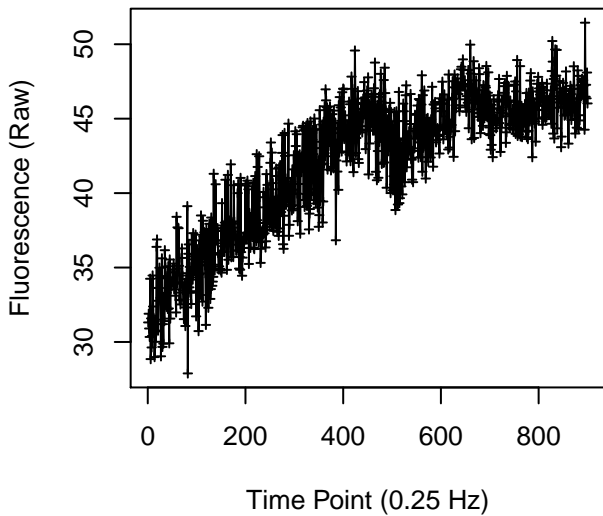

**Cell 1506**

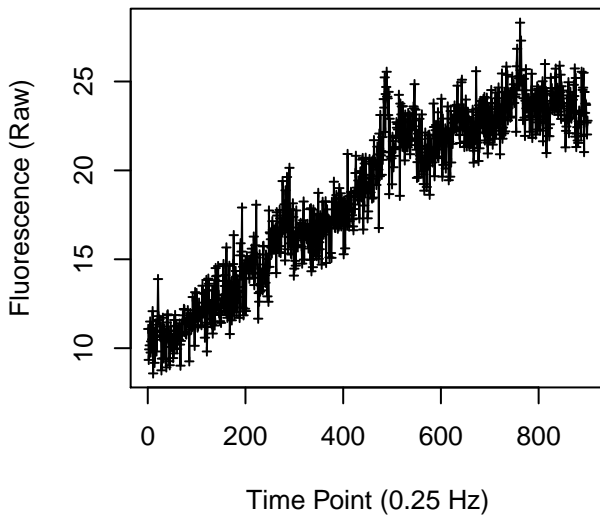

**Cell 1507**

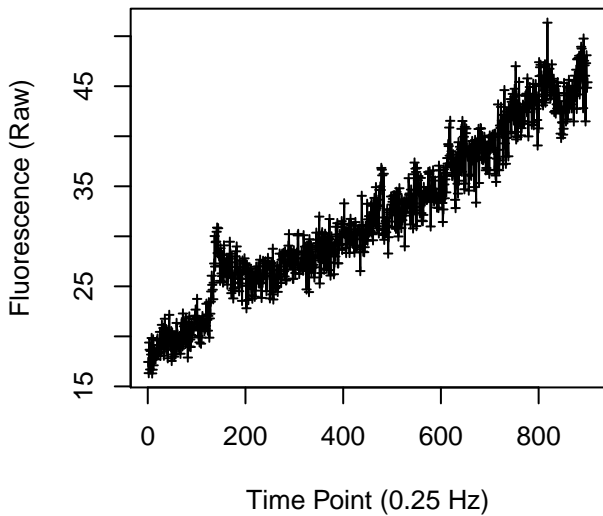

**Cell 1508**

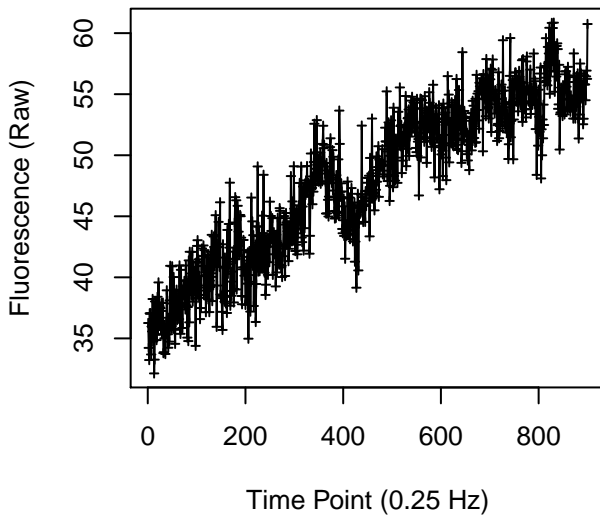

**Cell 1509**

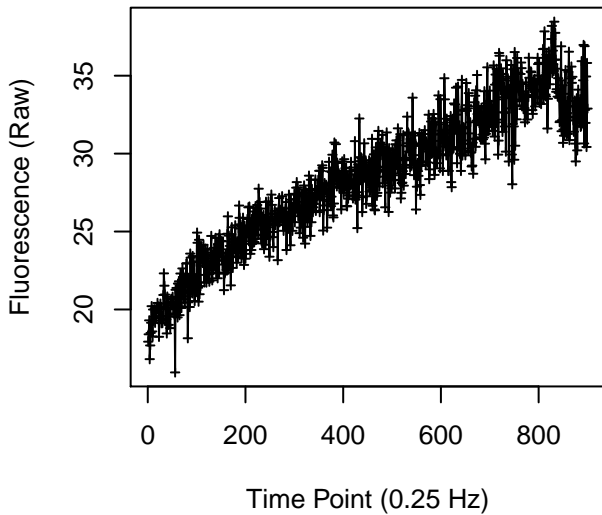

**Cell 1510**

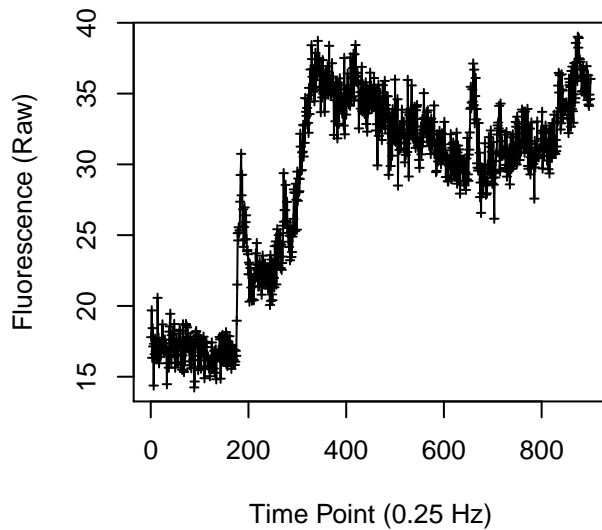

**Cell 1511**

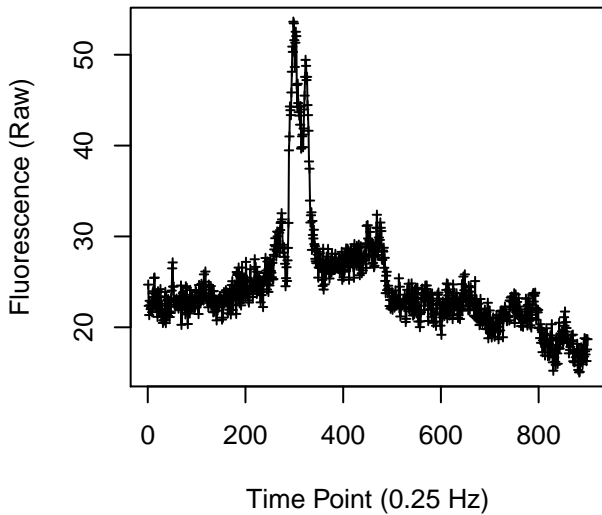

**Cell 1512**

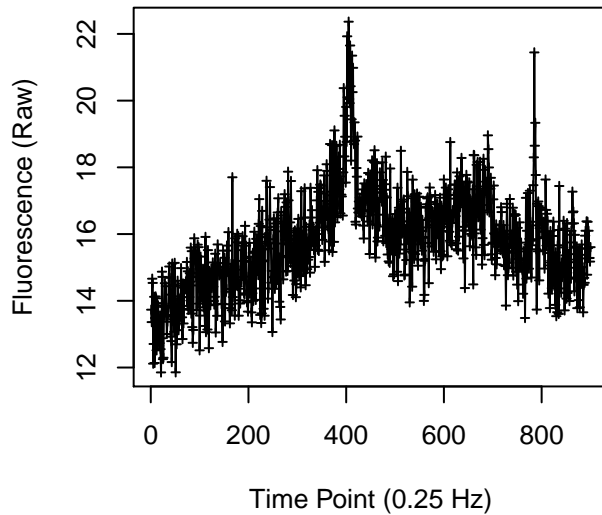



**Cell 1513**

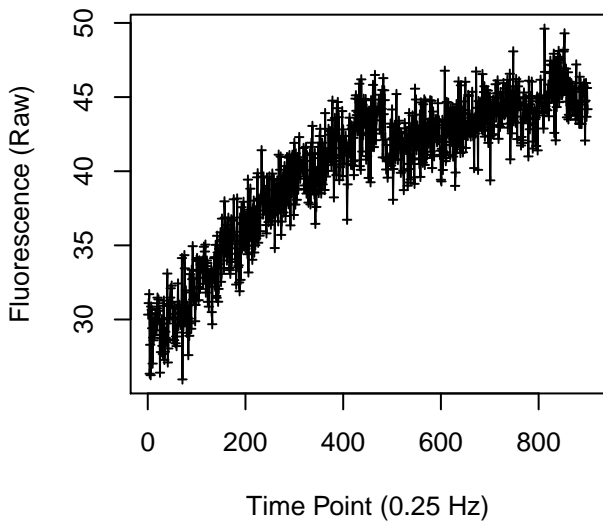

**Cell 1514**

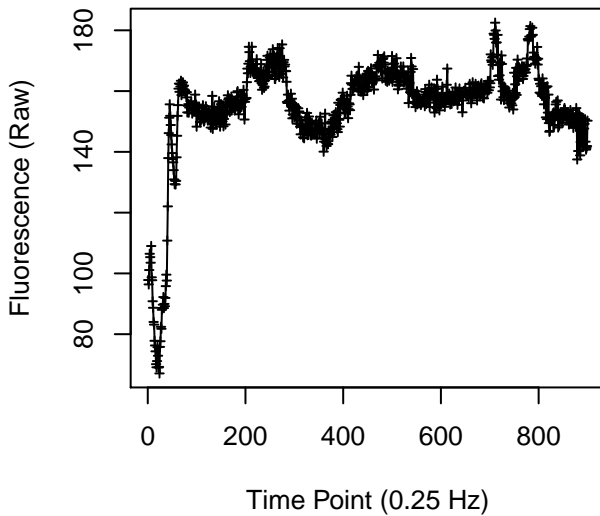

**Cell 1515**

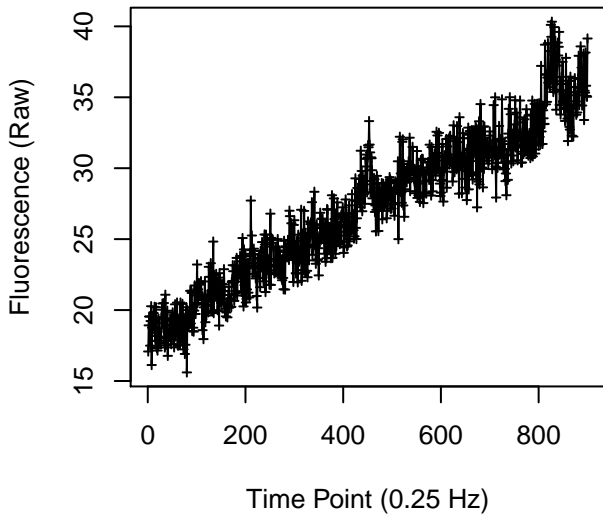

**Cell 1516**

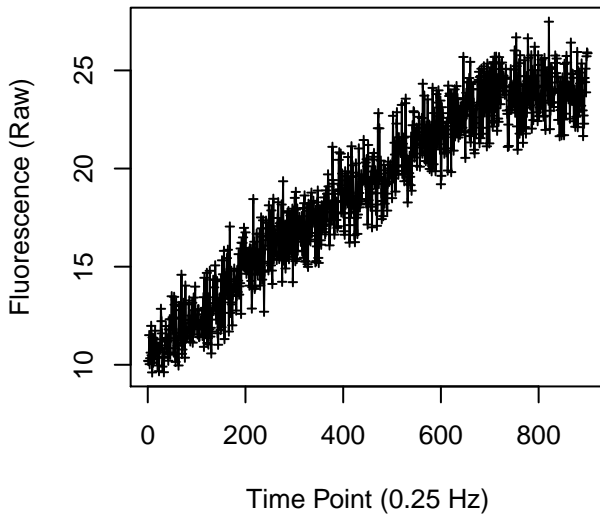

**Cell 1517**

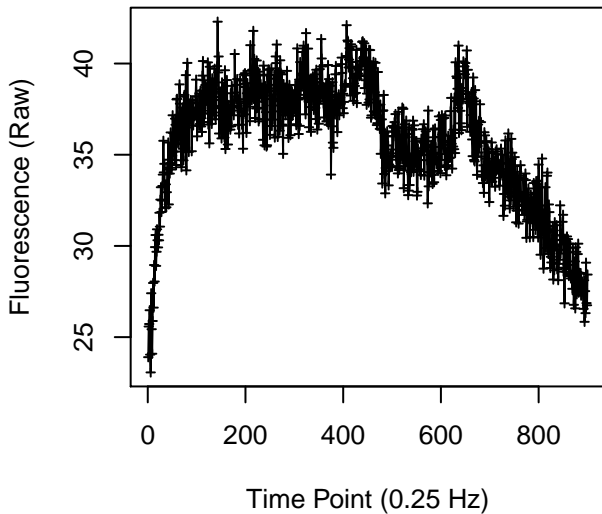

**Cell 1518**

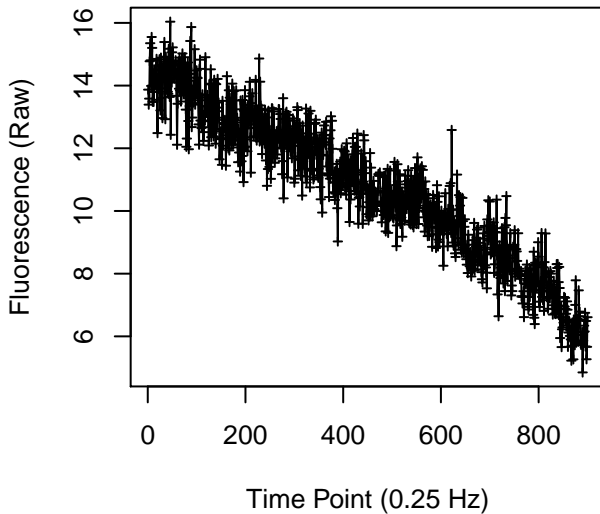

**Cell 1519**

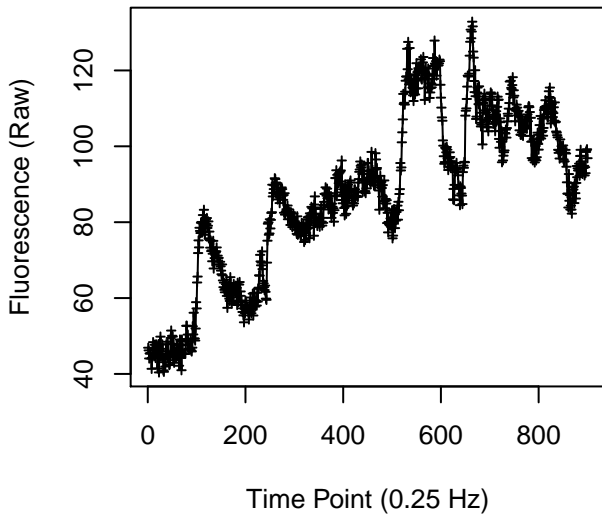

**Cell 1520**

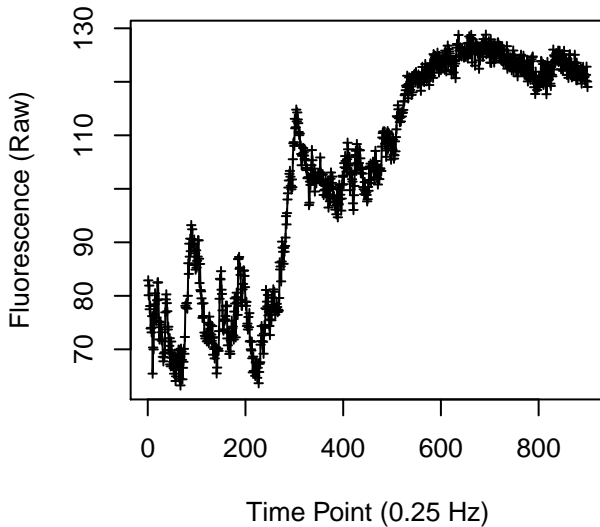

**Cell 1521**

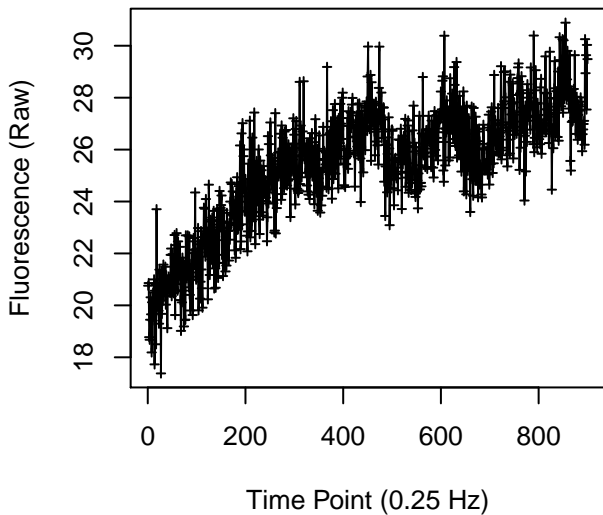

**Cell 1522**

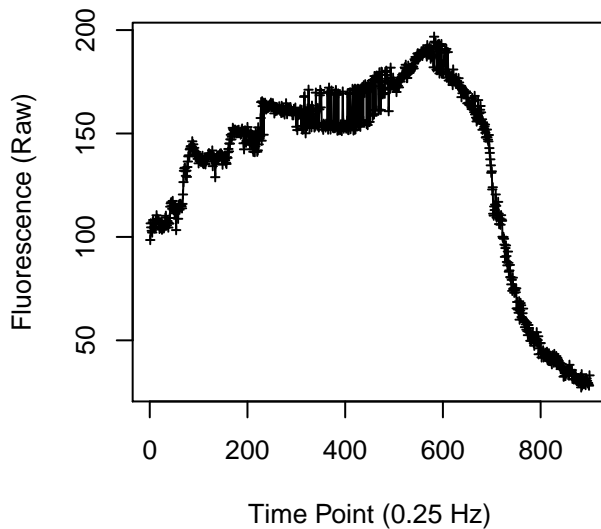

**Cell 1523**

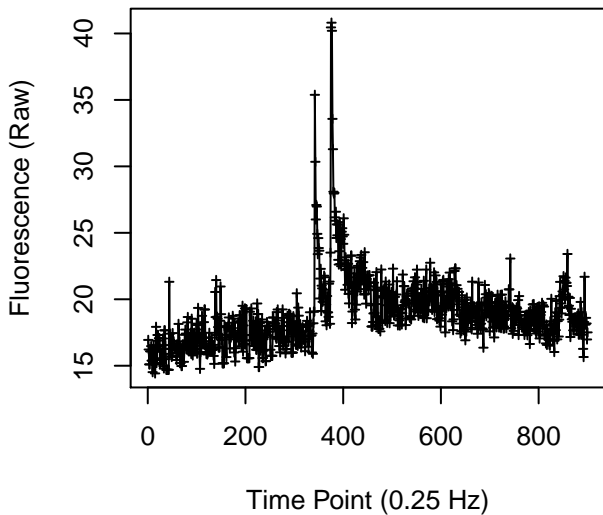

**Cell 1524**

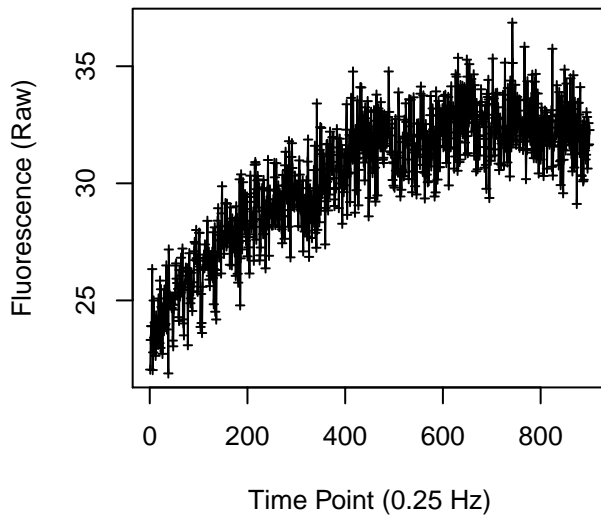

**Cell 1525**

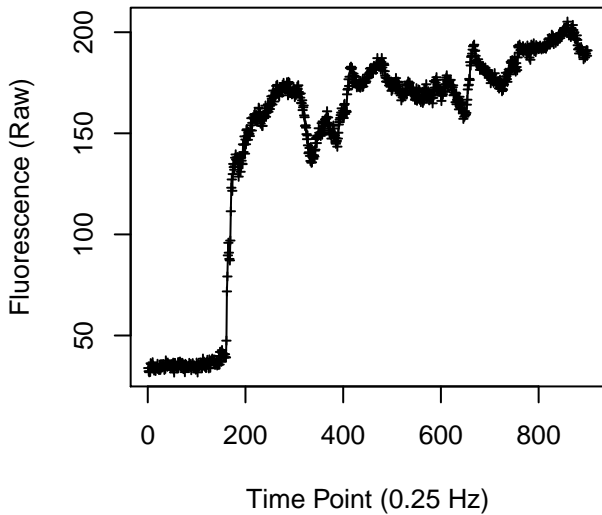

**Cell 1526**

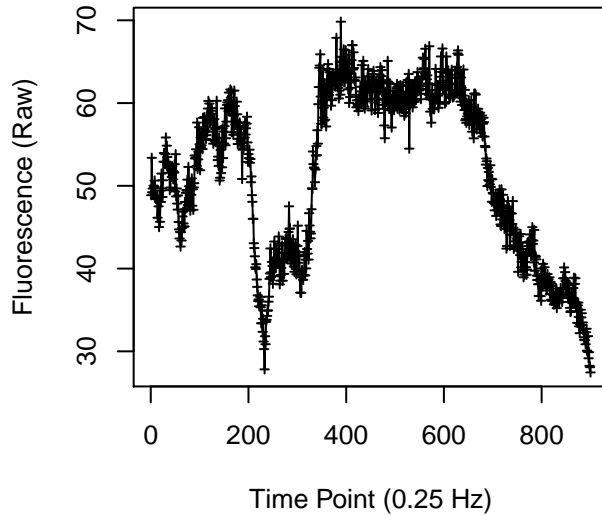

**Cell 1527**

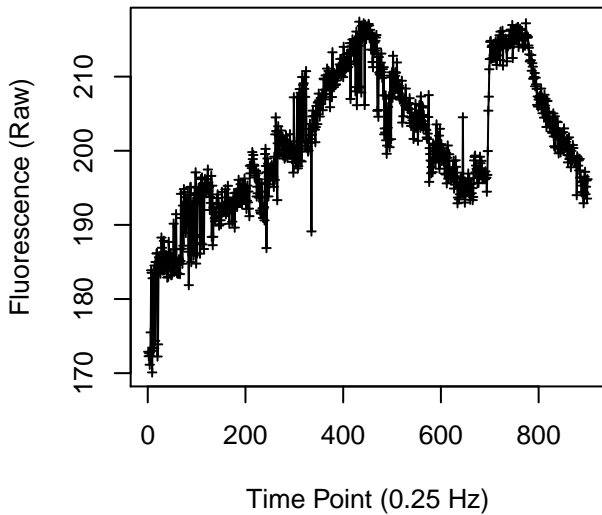

**Cell 1528**

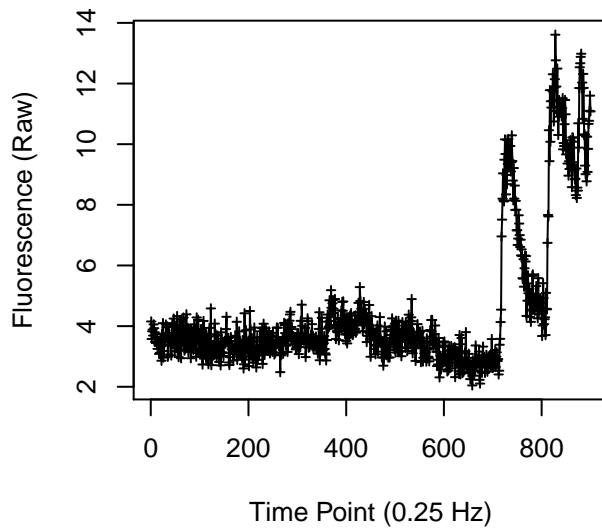

**Cell 1529**

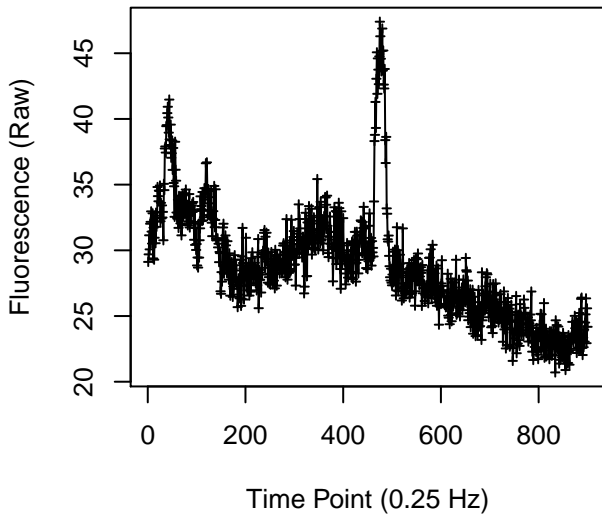

**Cell 1530**

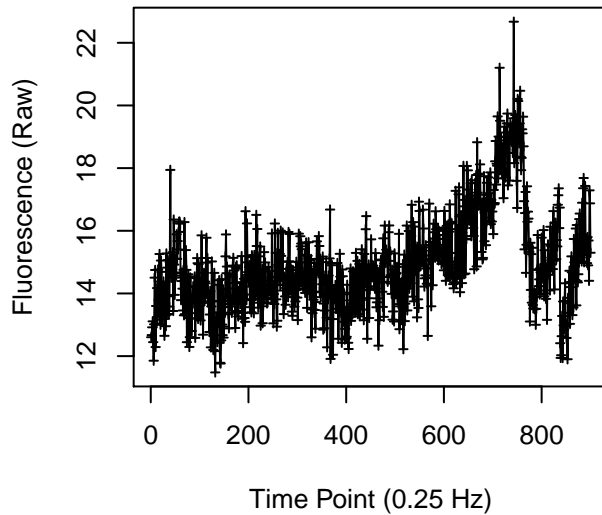

**Cell 1531**

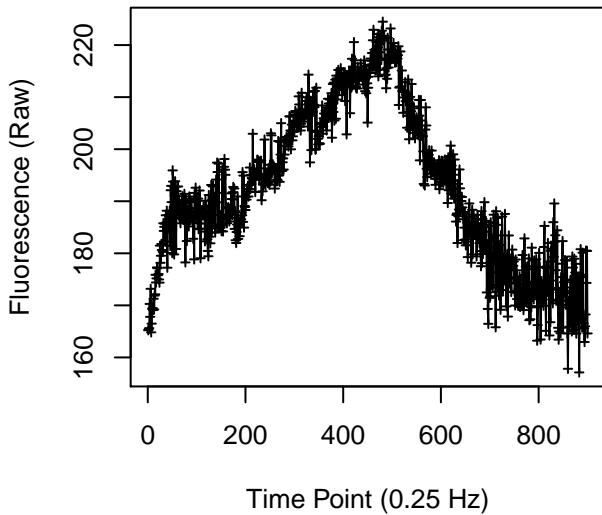

**Cell 1532**

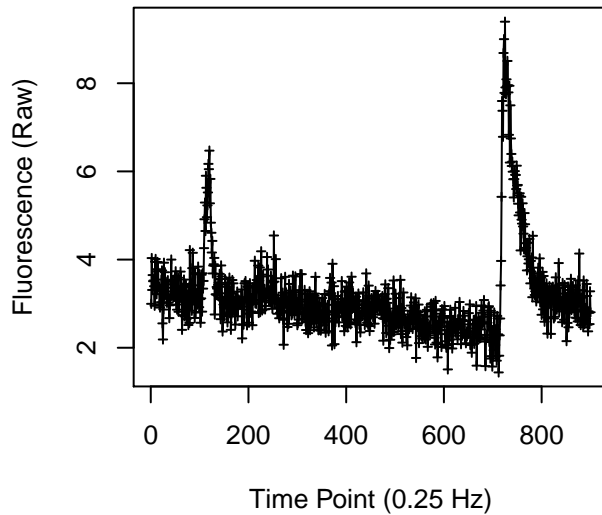

**Cell 1533**

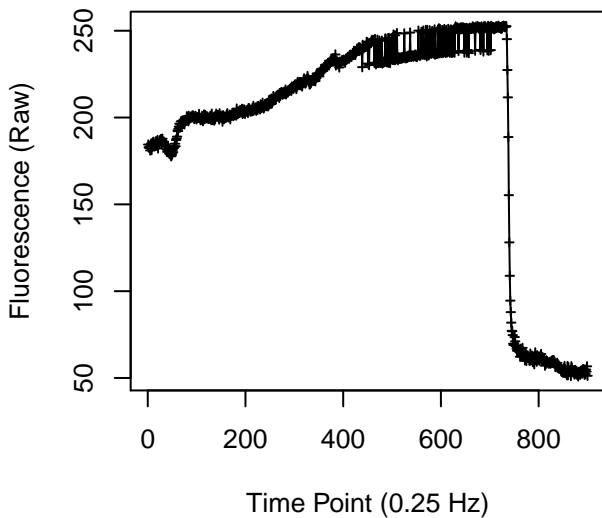

**Cell 1534**

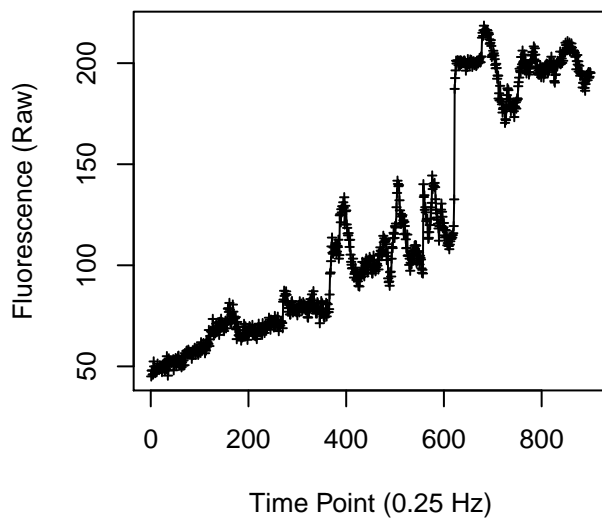

**Cell 1535**

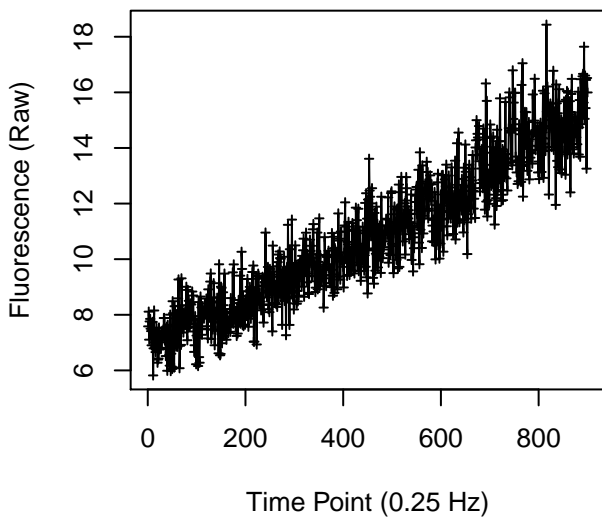

**Cell 1536**

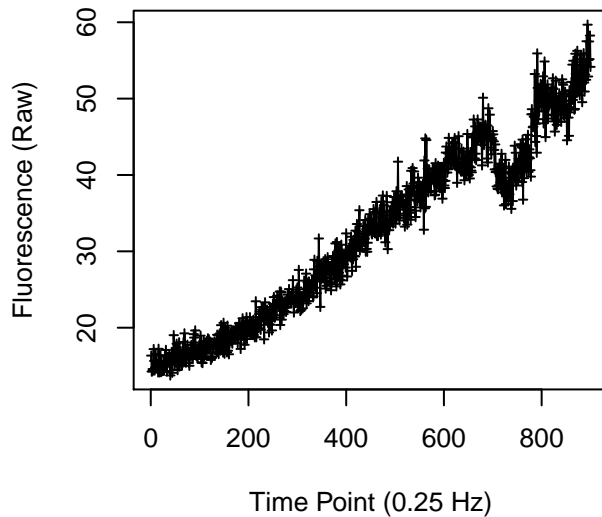

**Cell 1537**

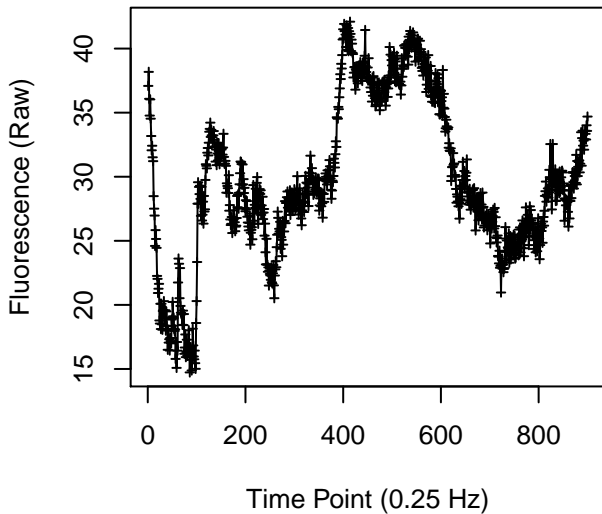

**Cell 1538**

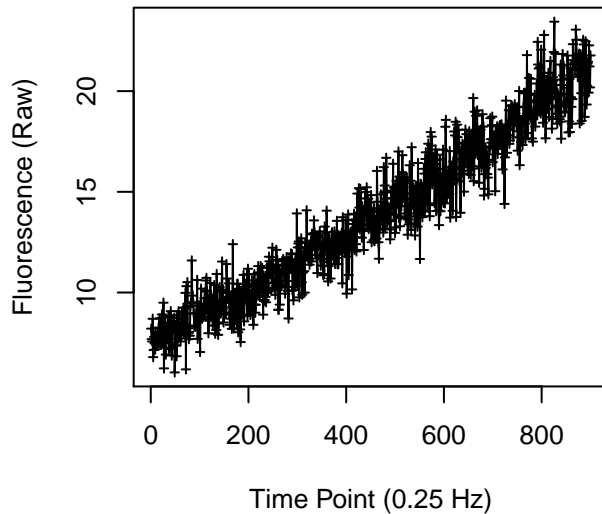

**Cell 1539**

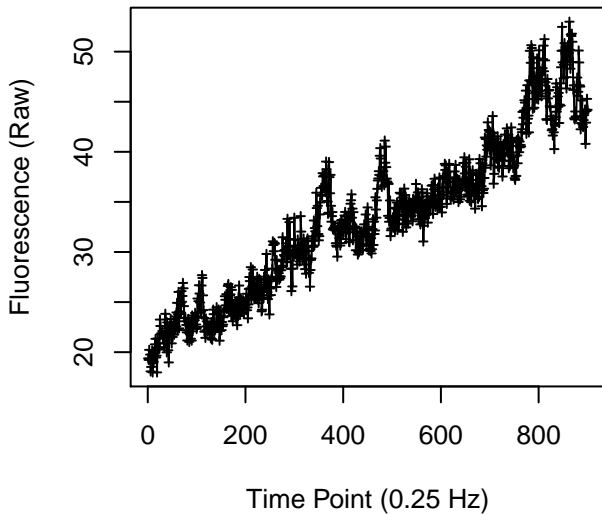

**Cell 1540**

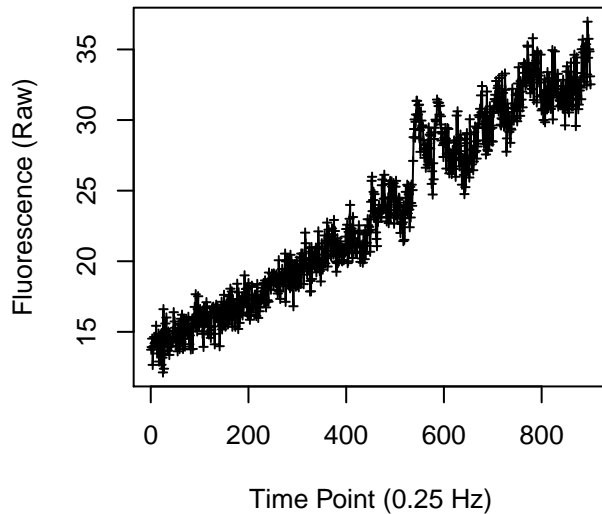

**Cell 1541**

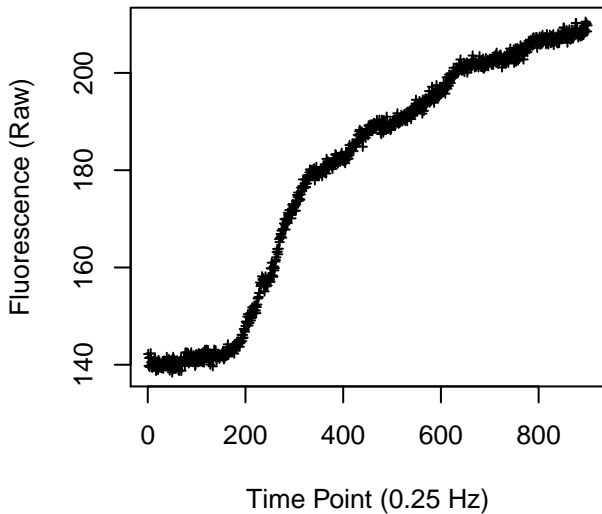

**Cell 1542**

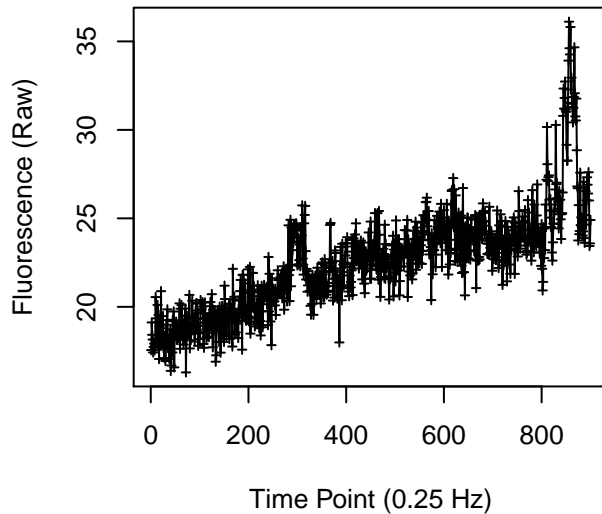

**Cell 1543**

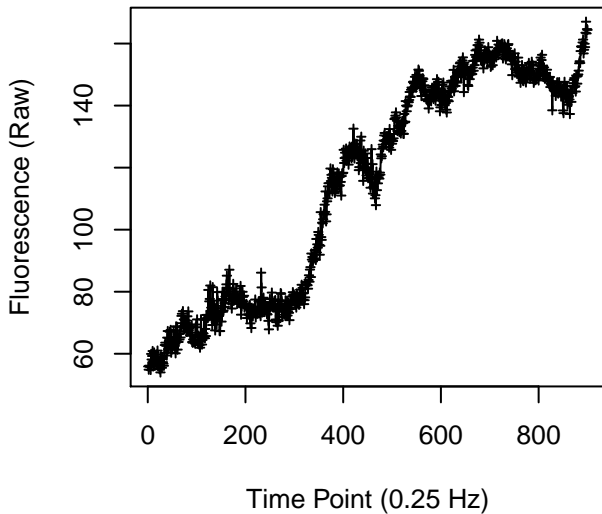

**Cell 1544**

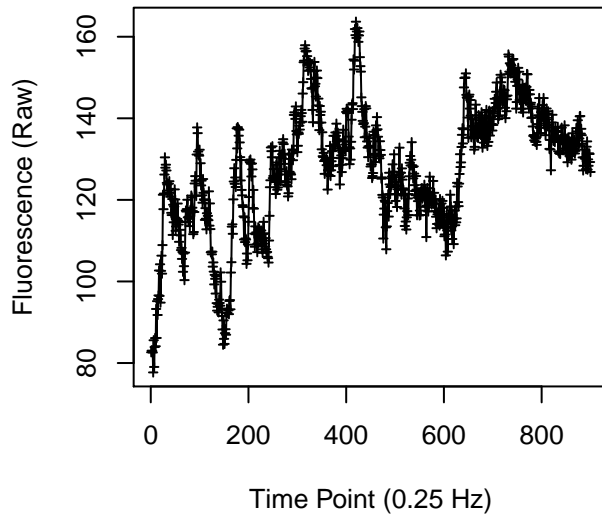



**Cell 1545**

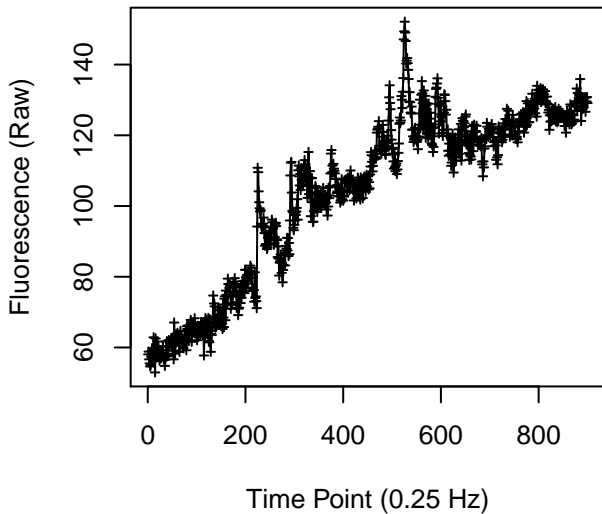

**Cell 1546**

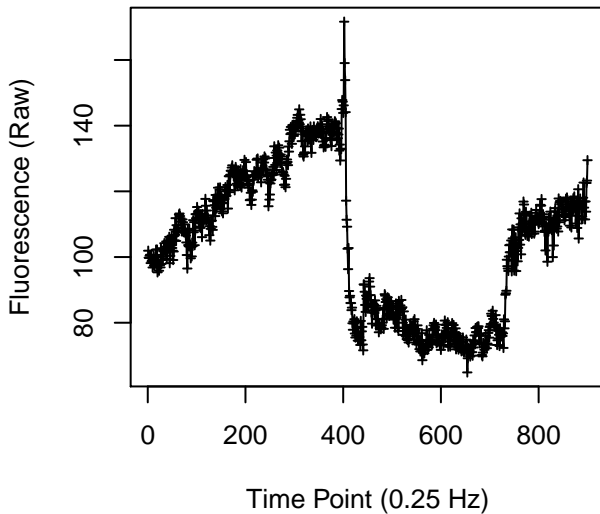

**Cell 1547**

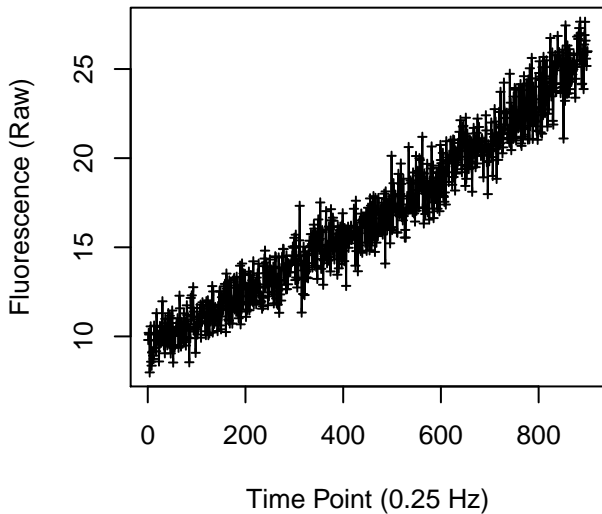

**Cell 1548**

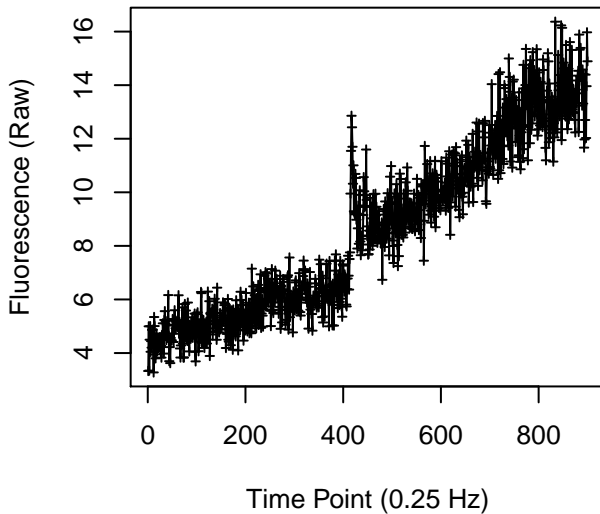

**Cell 1549**

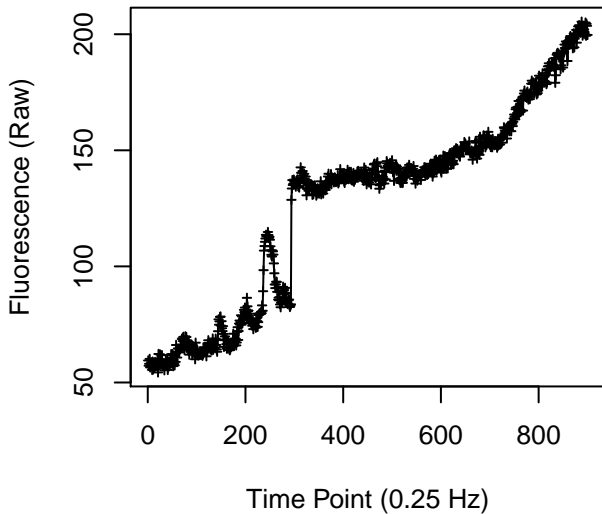

**Cell 1550**

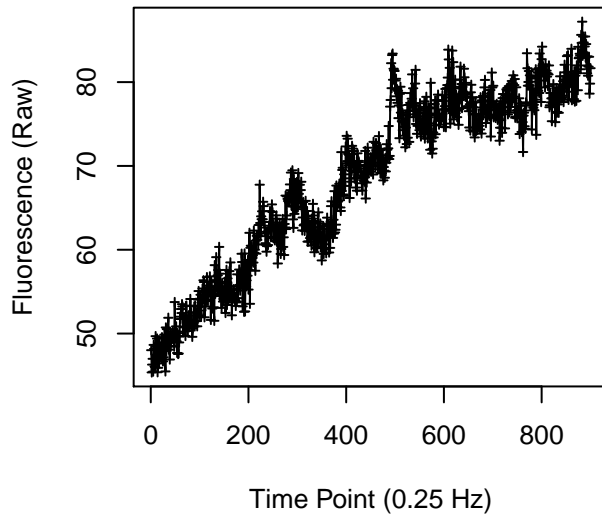

**Cell 1551**

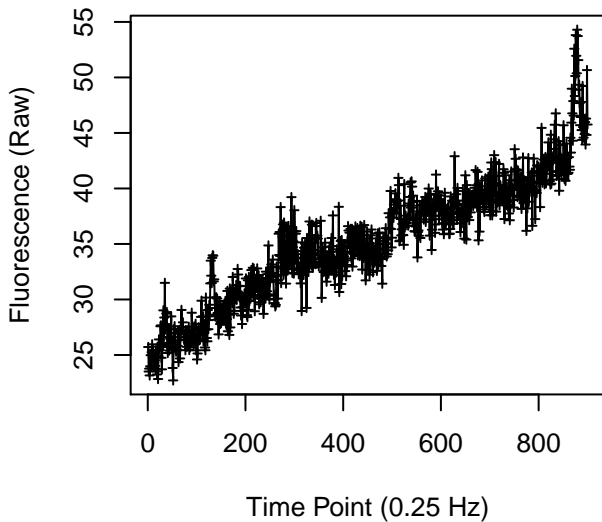

**Cell 1552**

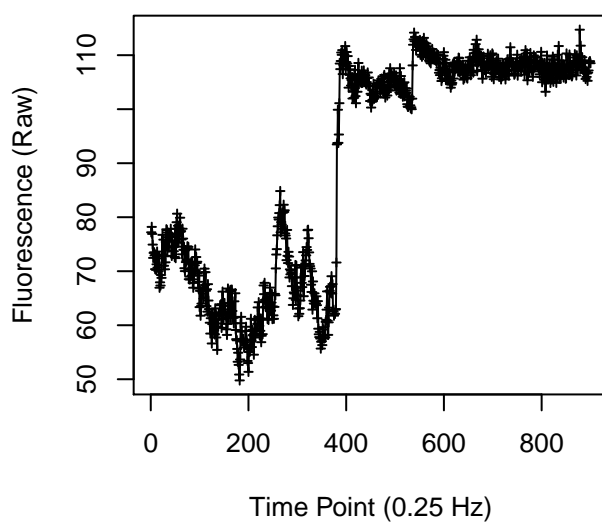

**Cell 1553**

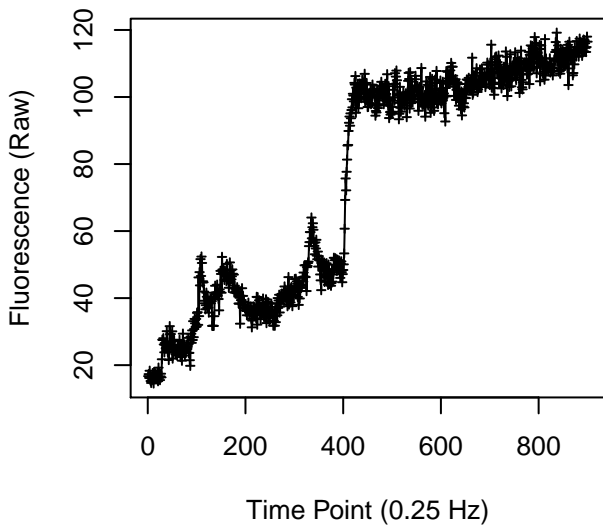

**Cell 1554**

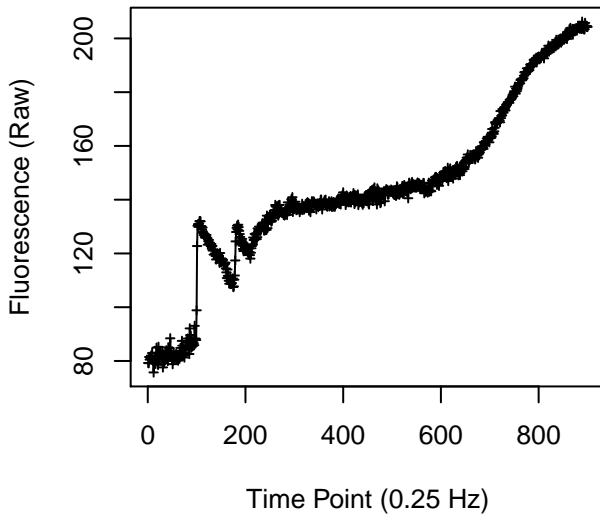

**Cell 1555**

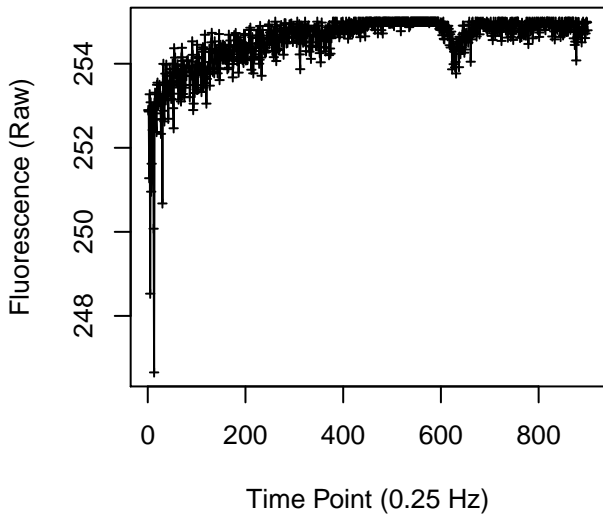

**Cell 1556**

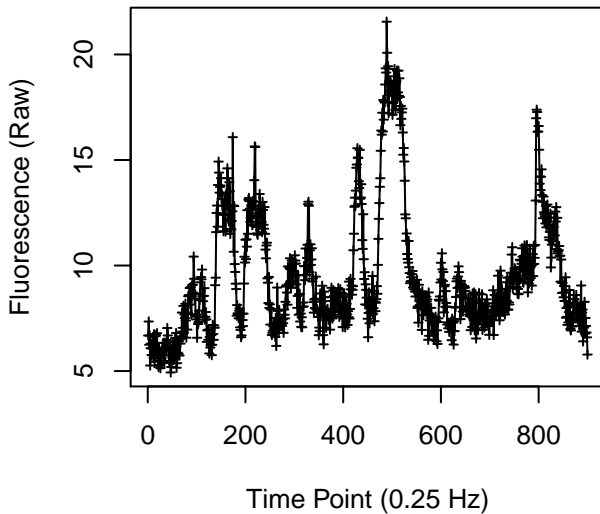

**Cell 1557**

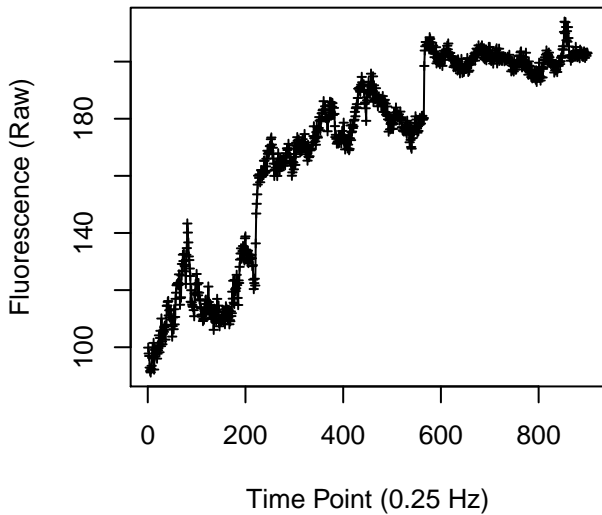

**Cell 1558**

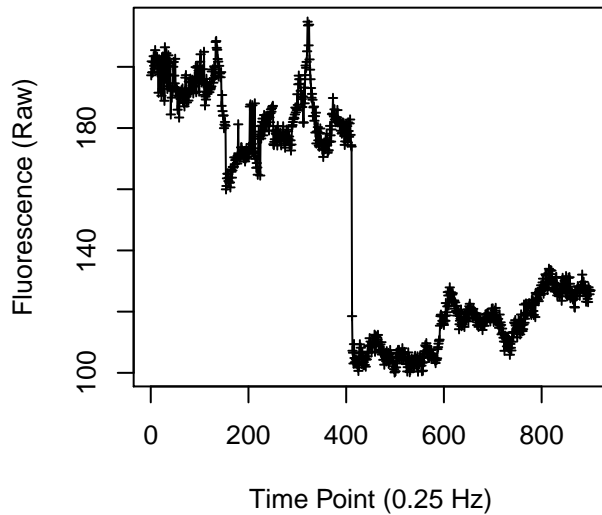

**Cell 1559**

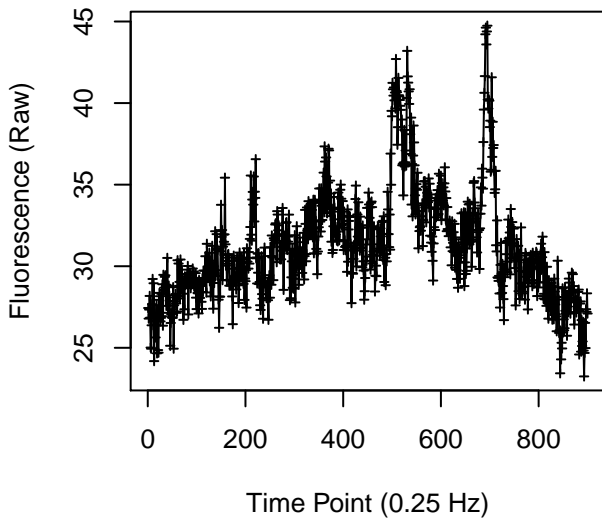

**Cell 1560**

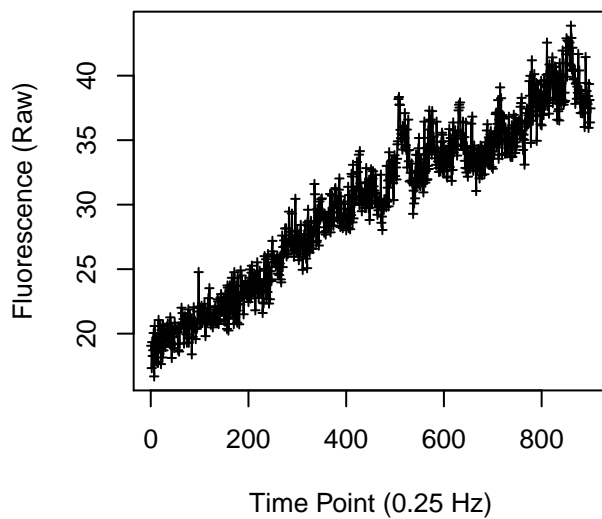

**Cell 1561**

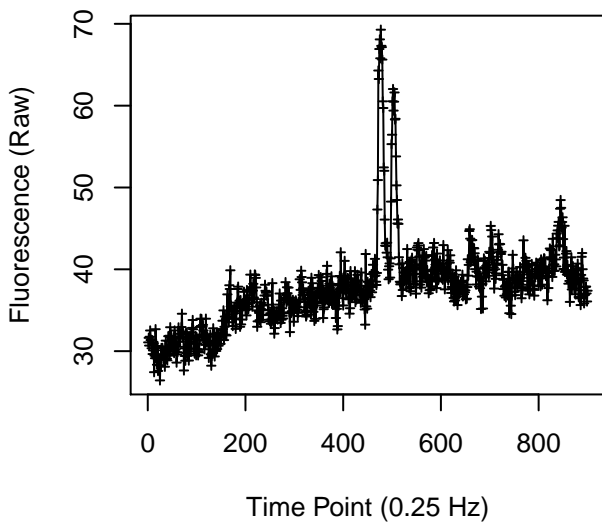

**Cell 1562**

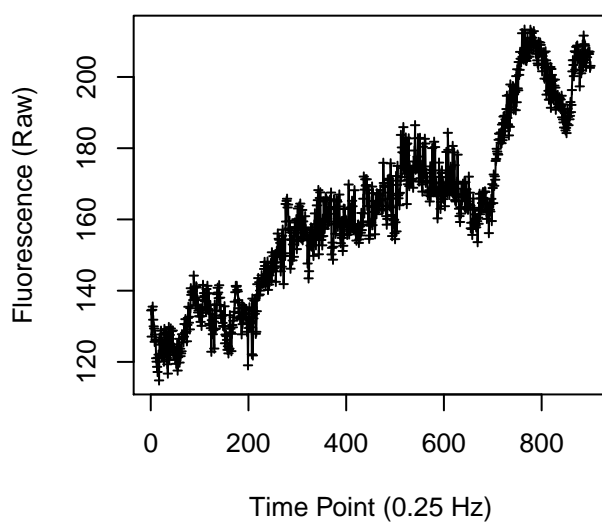

**Cell 1563**

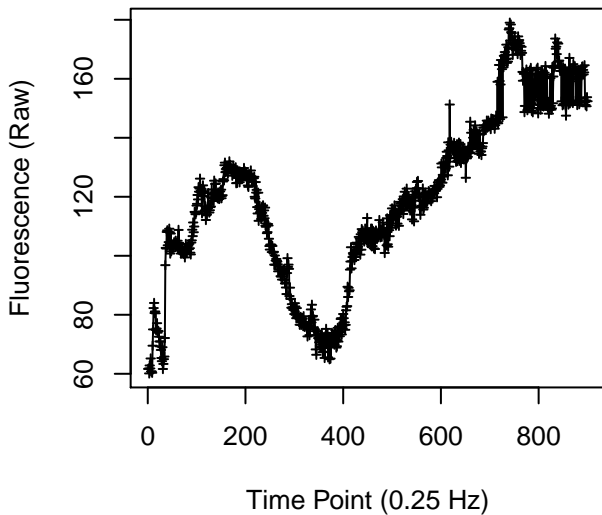

**Cell 1564**

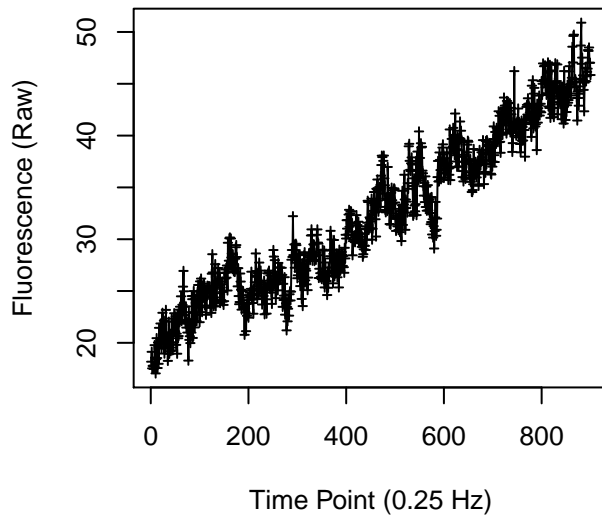

**Cell 1565**

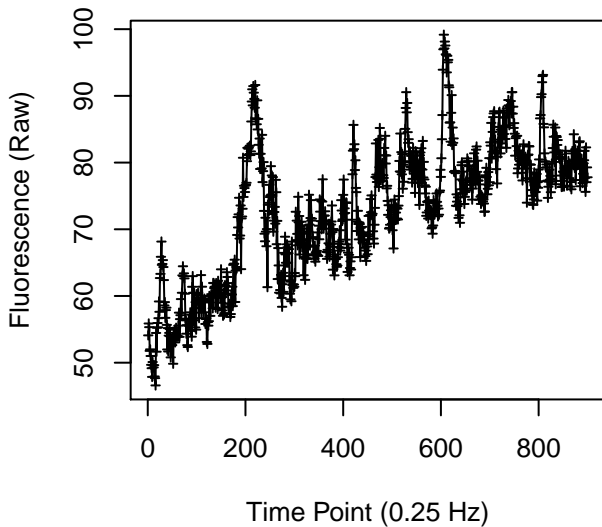

**Cell 1566**

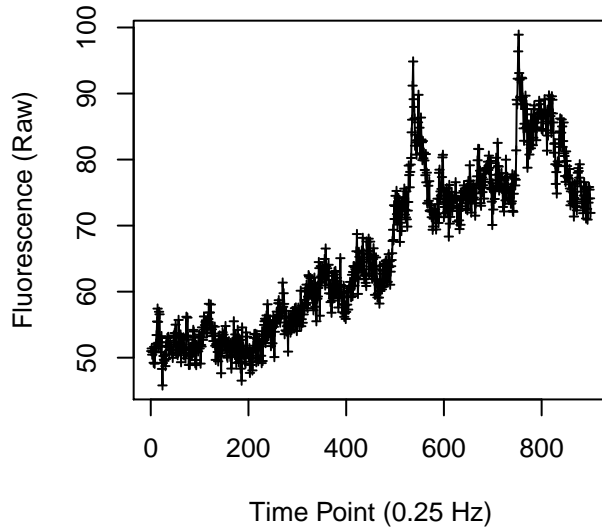

**Cell 1567**

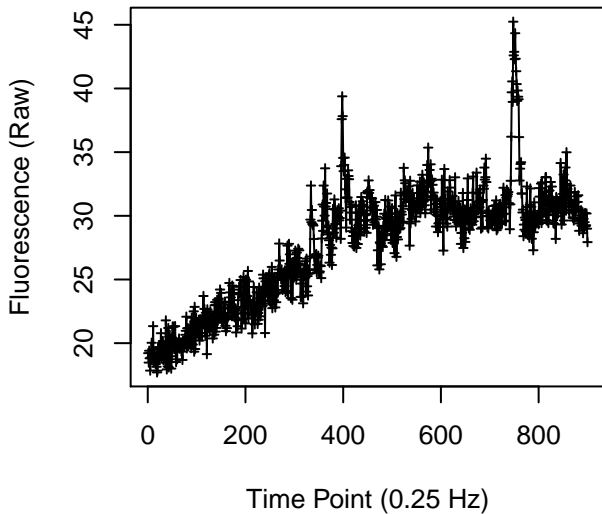

**Cell 1568**

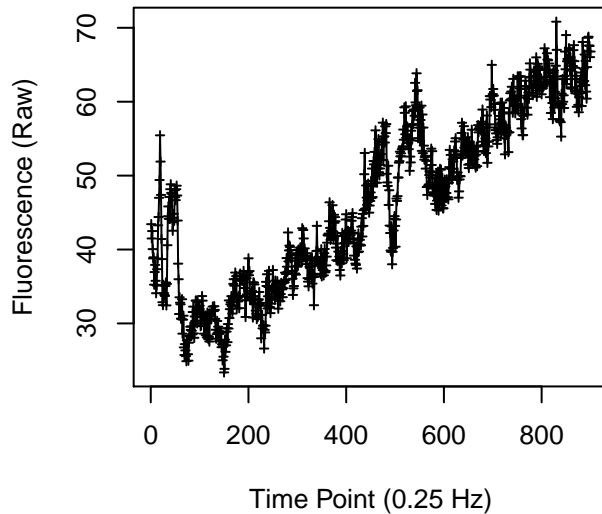

**Cell 1569**

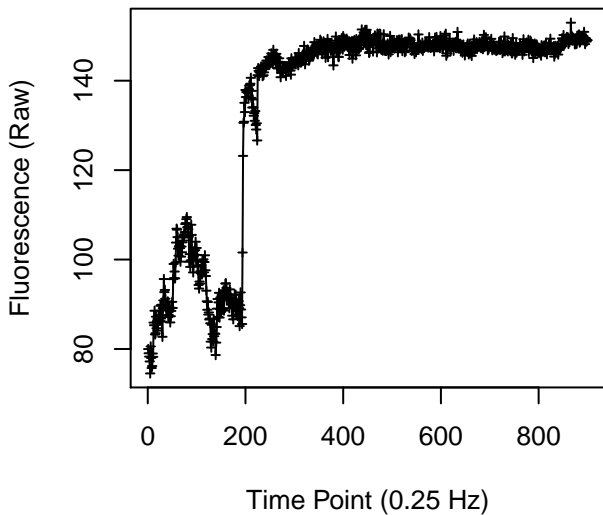

**Cell 1570**

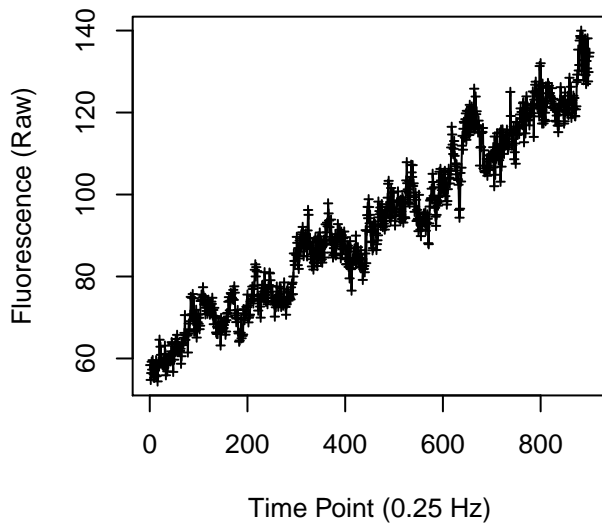

**Cell 1571**

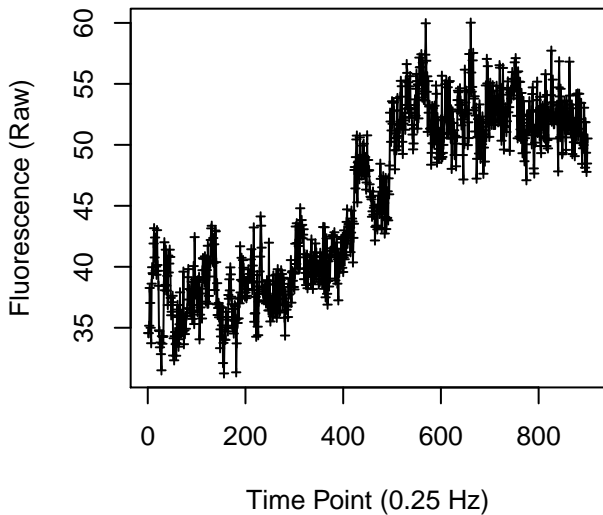

**Cell 1572**

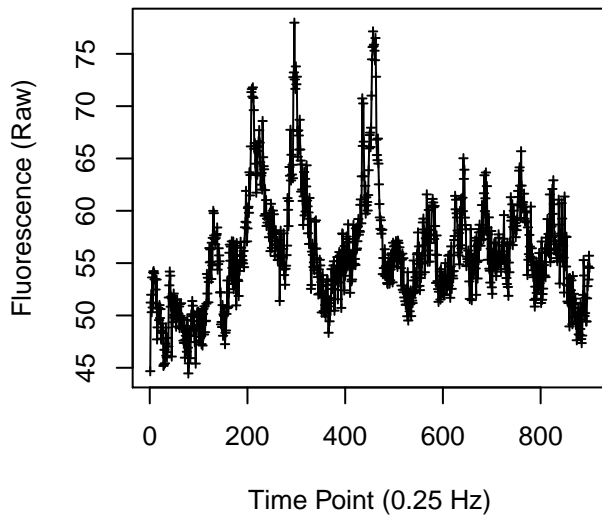

**Cell 1573**

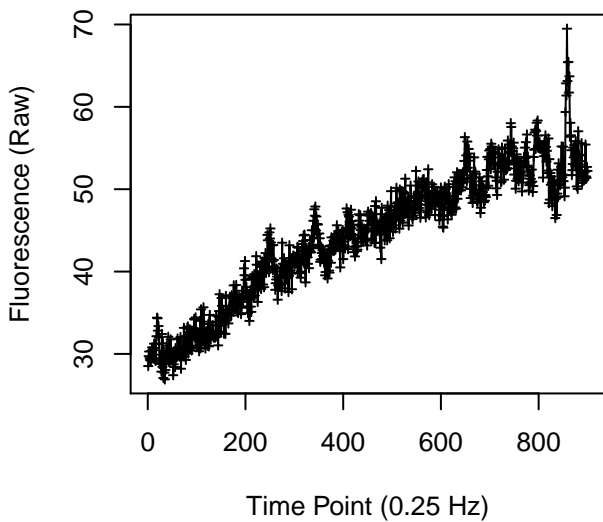

**Cell 1574**

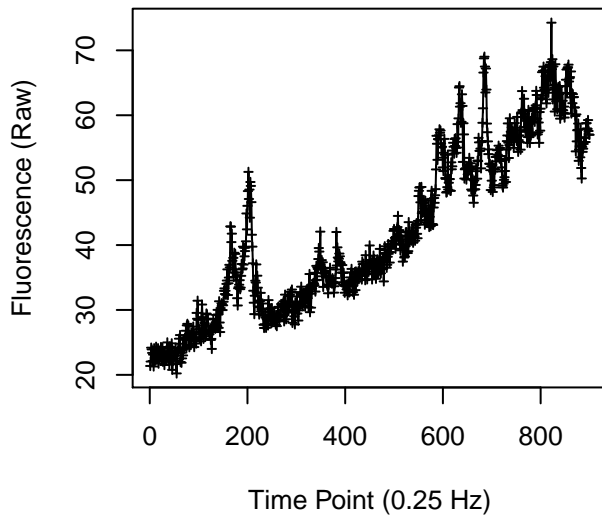

**Cell 1575**

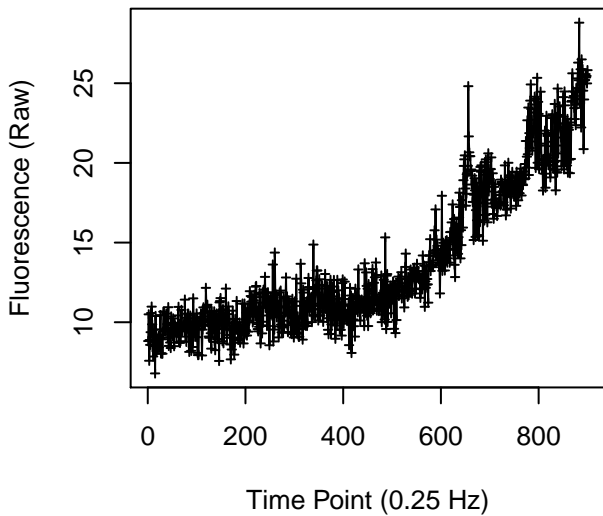

**Cell 1576**

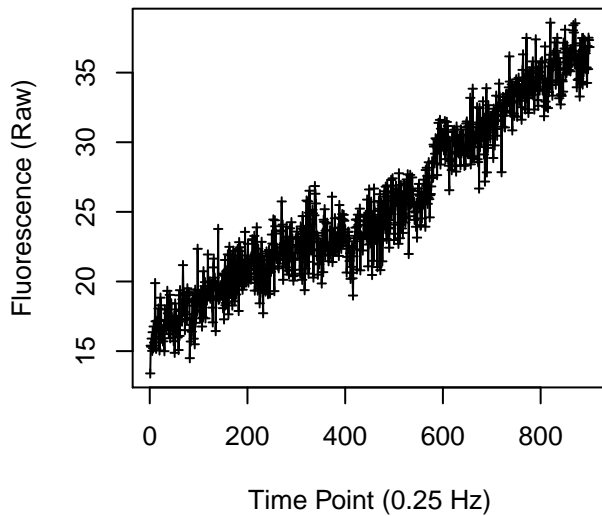



**Cell 1577**

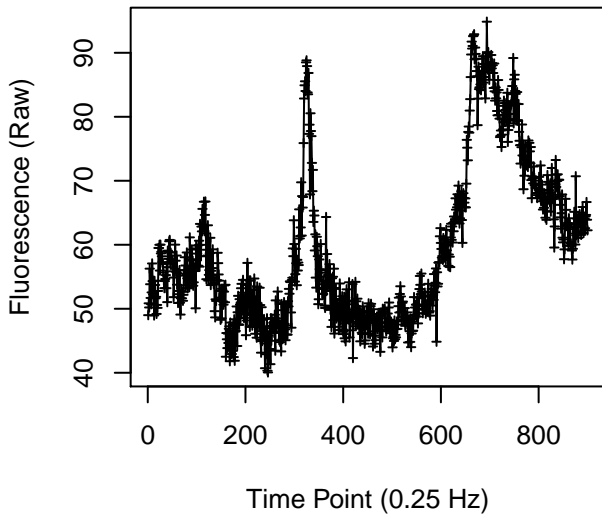

**Cell 1578**

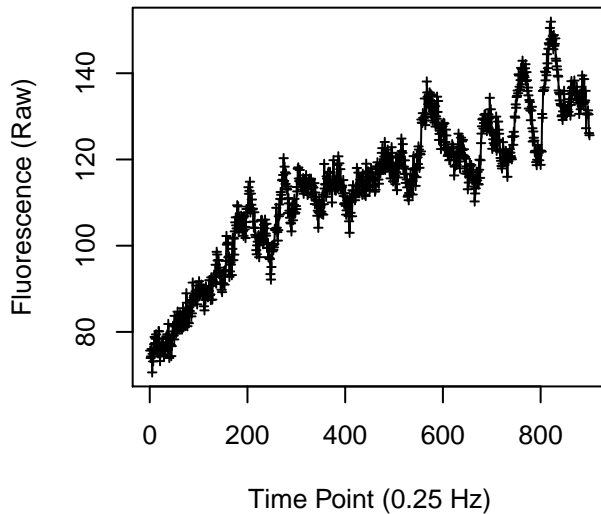

**Cell 1579**

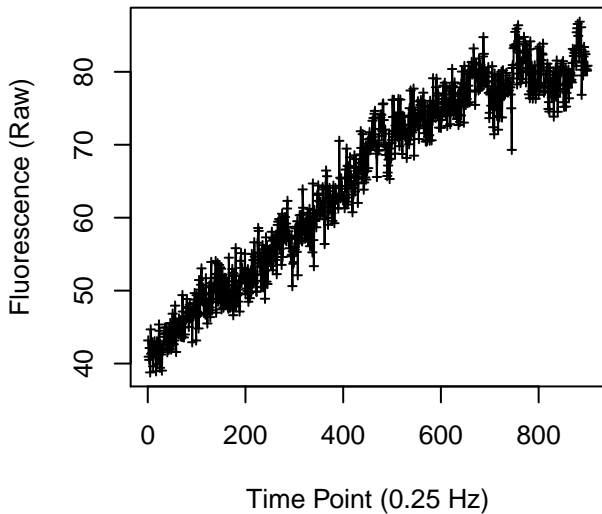

**Cell 1580**

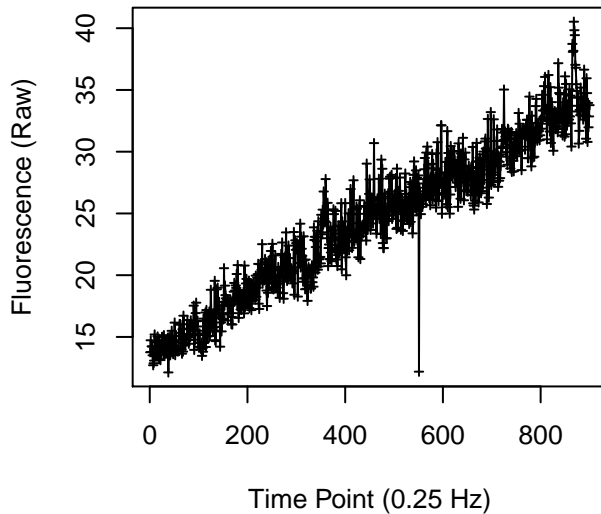

**Cell 1581**

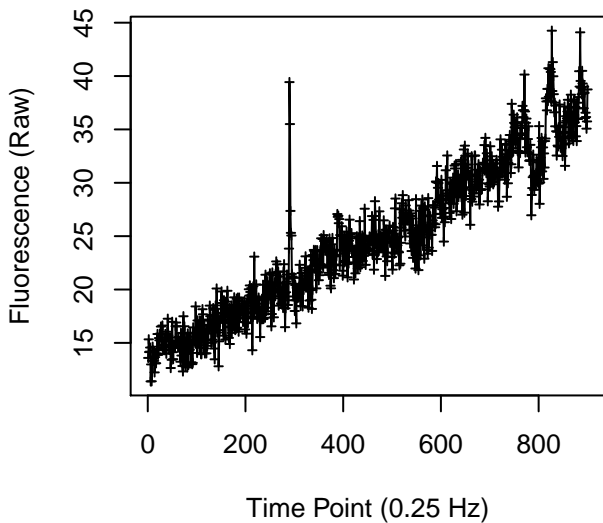

**Cell 1582**

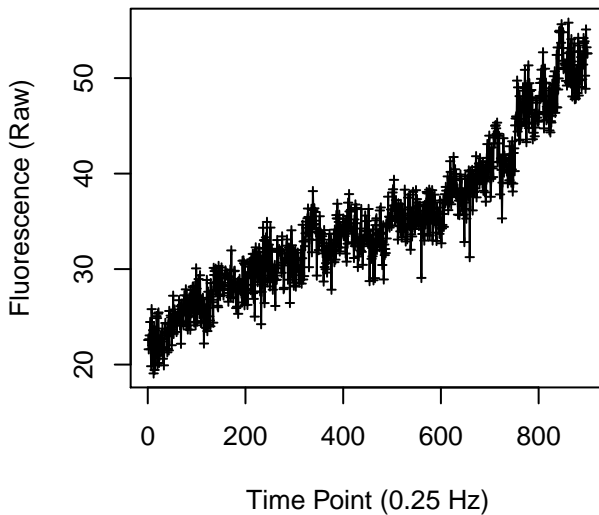

**Cell 1583**

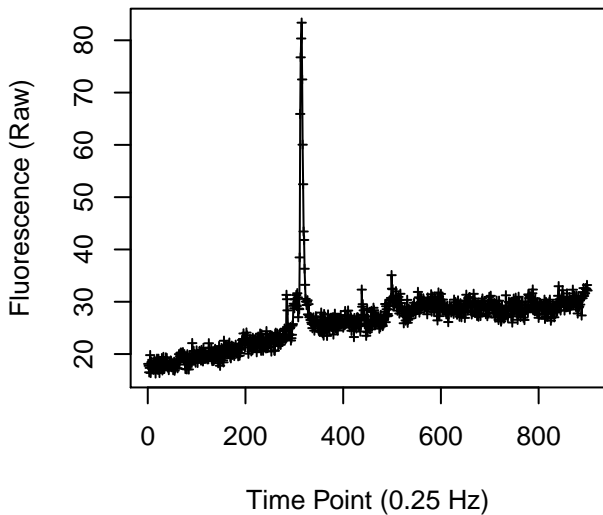

**Cell 1584**

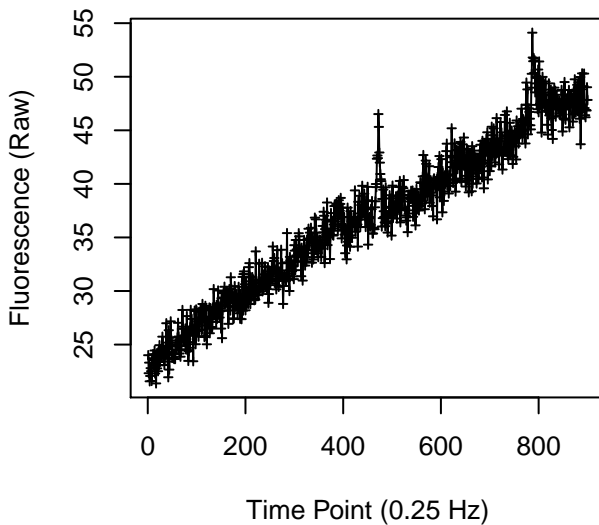

**Cell 1585**

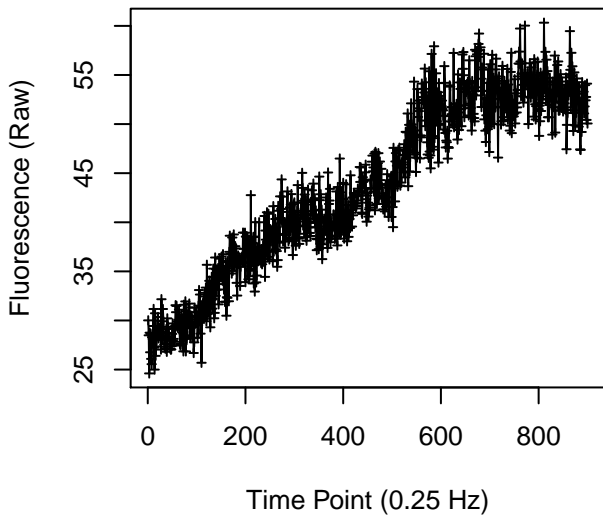

**Cell 1586**

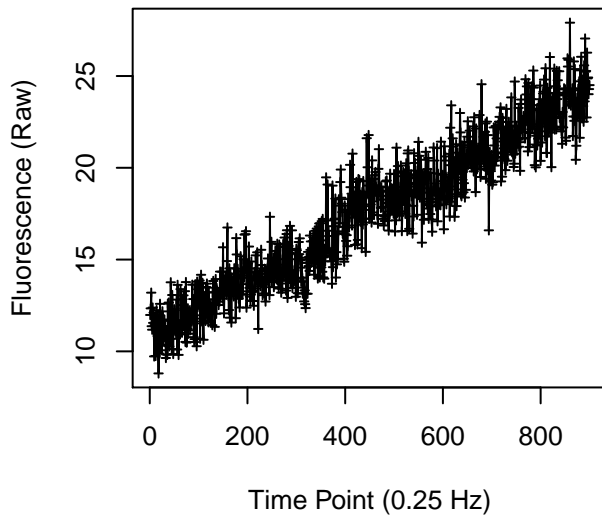

**Cell 1587**

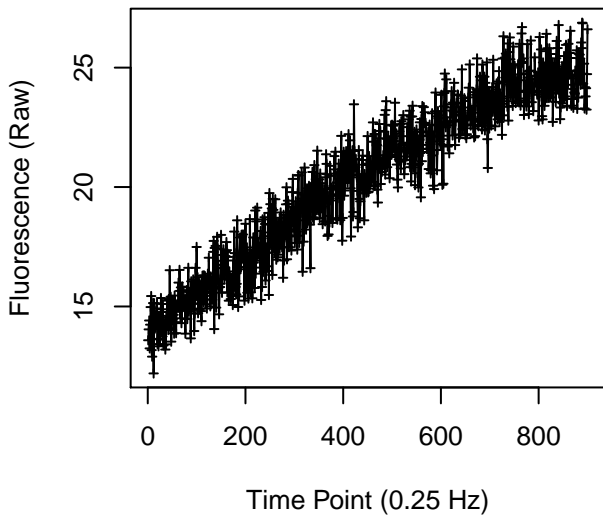

**Cell 1588**

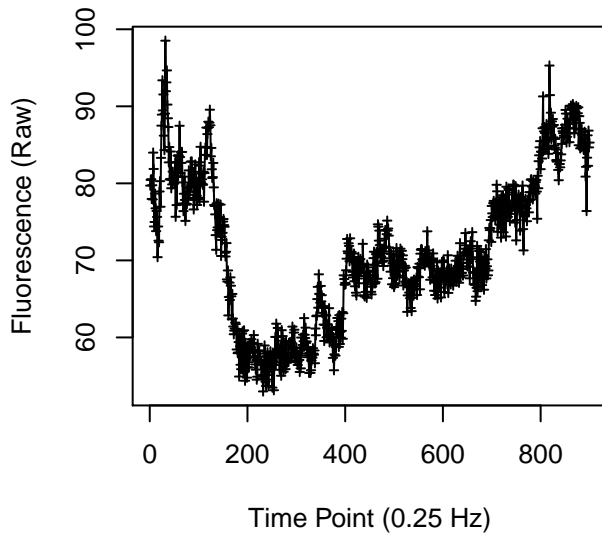

**Cell 1589**

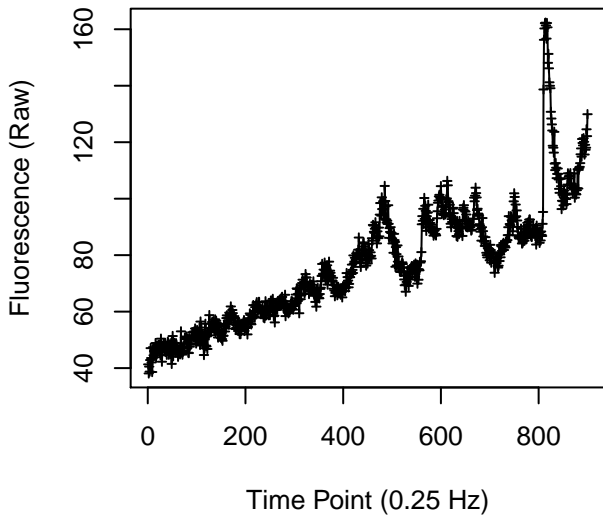

**Cell 1590**

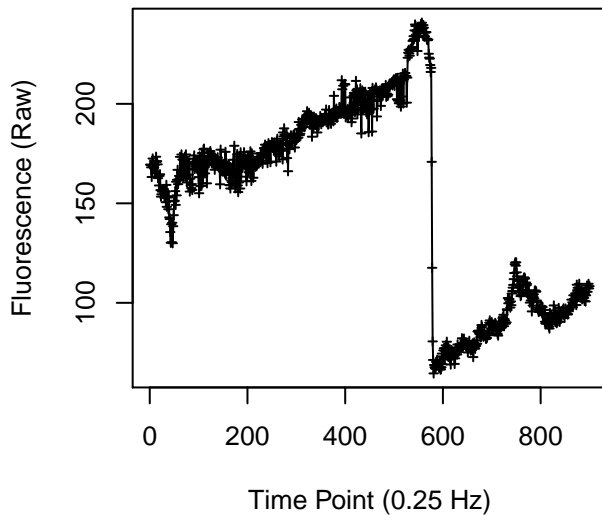

**Cell 1591**

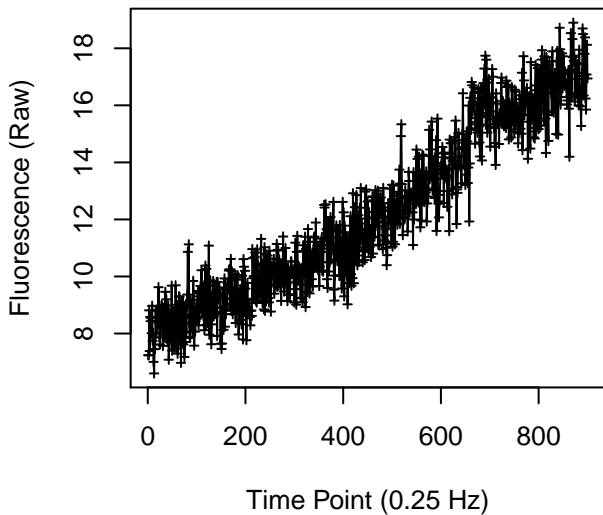

**Cell 1592**

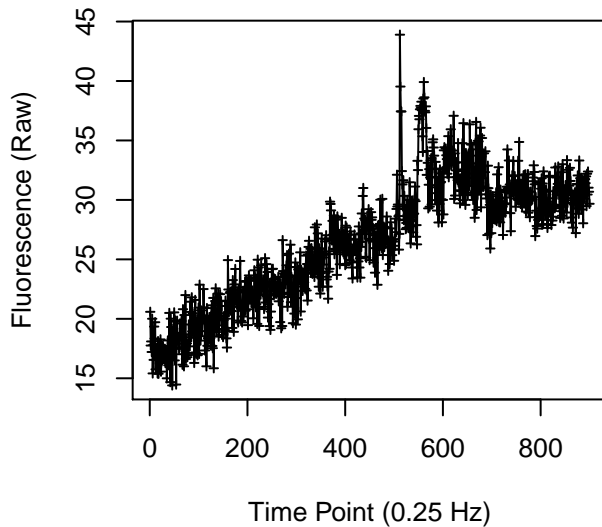

**Cell 1593**

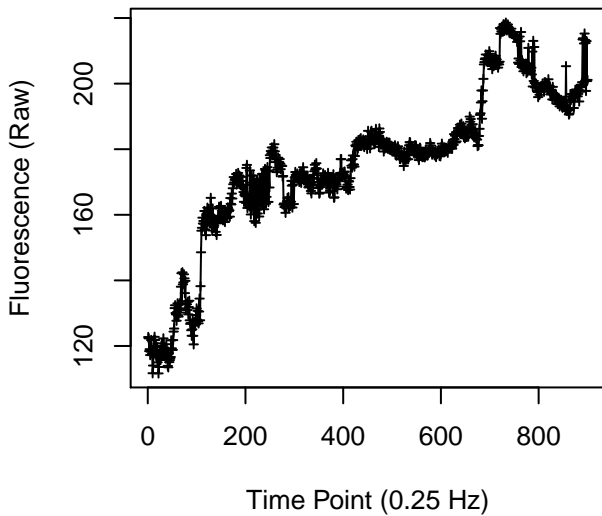

**Cell 1594**

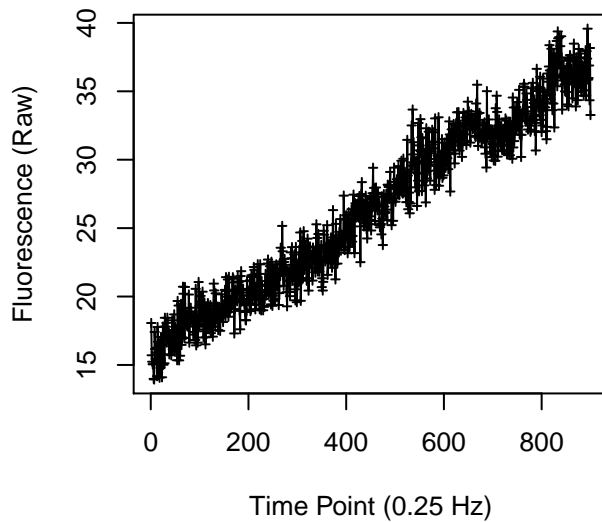

**Cell 1595**

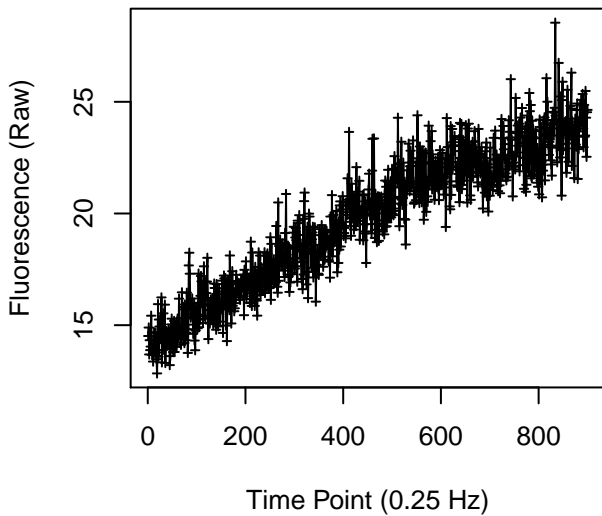

**Cell 1596**

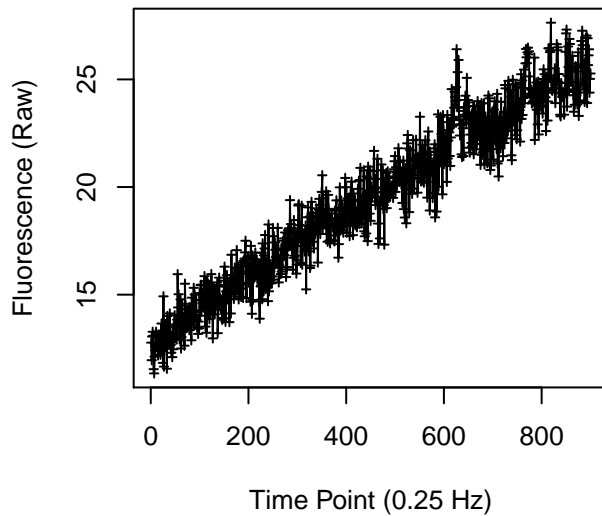

**Cell 1597**

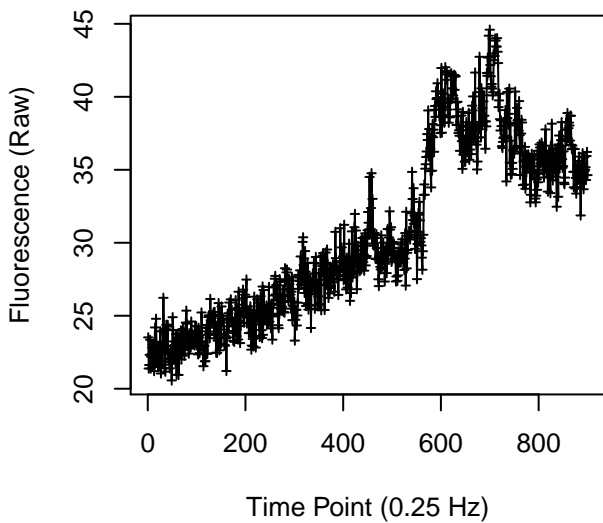

**Cell 1598**

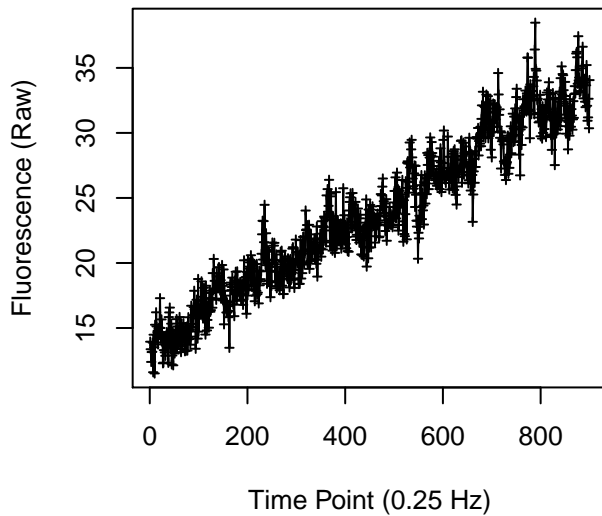

**Cell 1599**

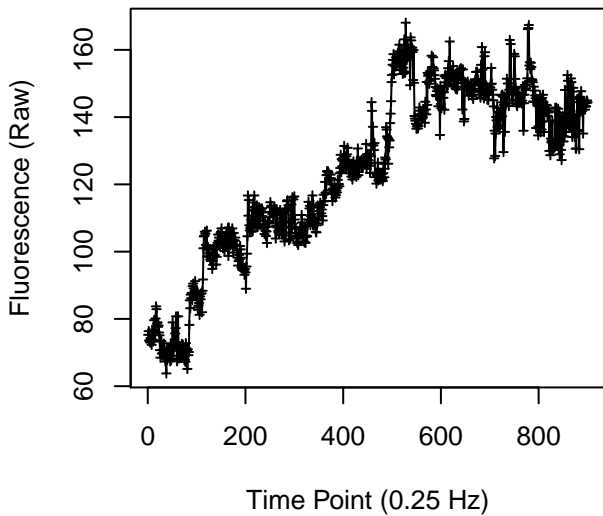

**Cell 1600**

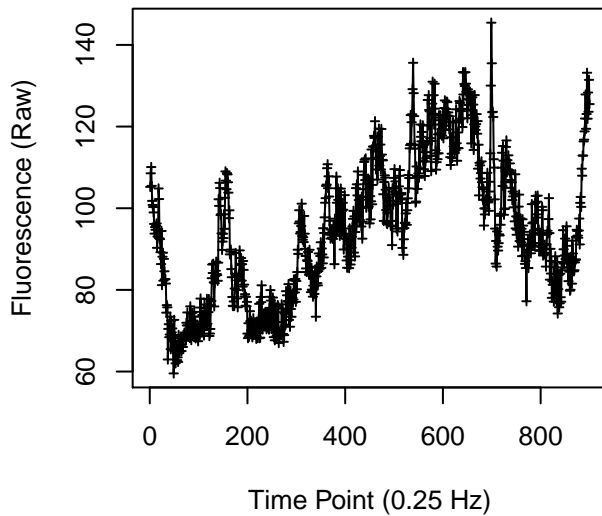

**Cell 1601**

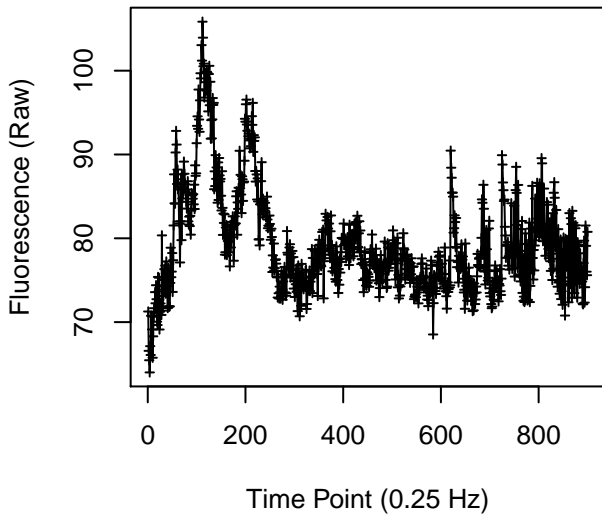

**Cell 1602**

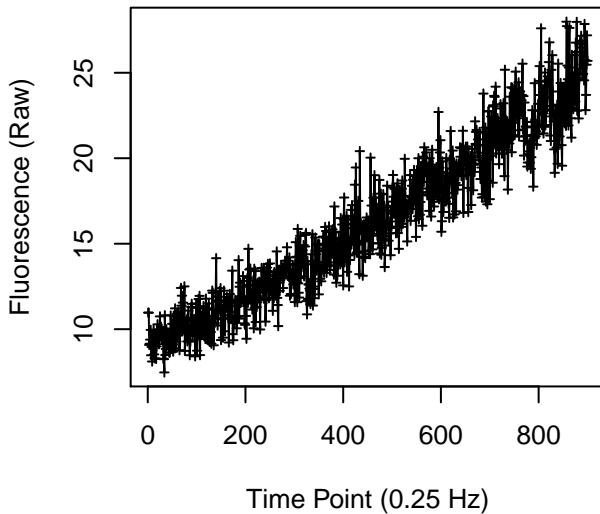

**Cell 1603**

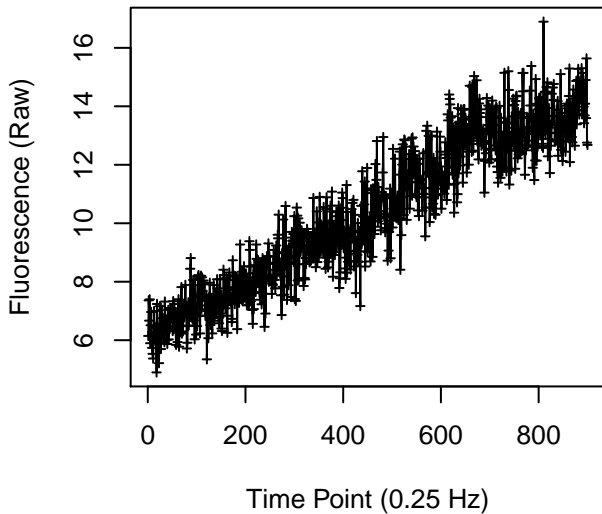

**Cell 1604**

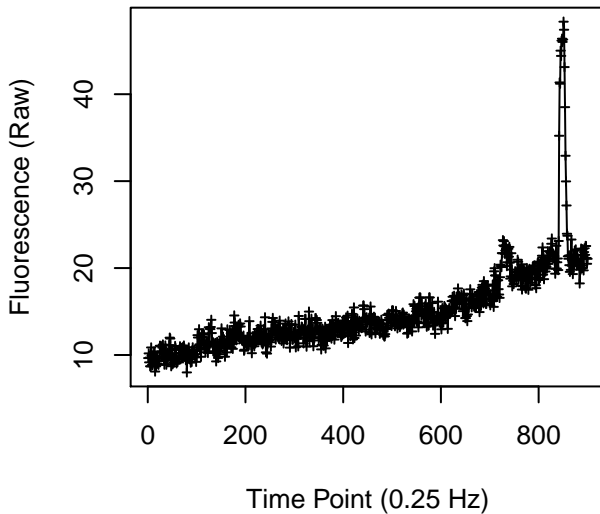

**Cell 1605**

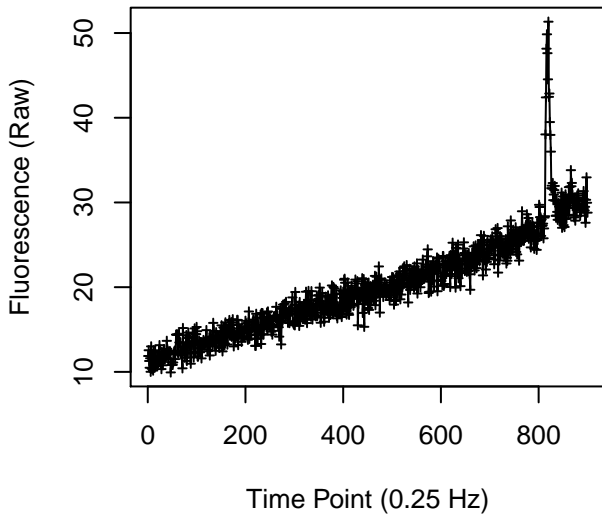

**Cell 1606**

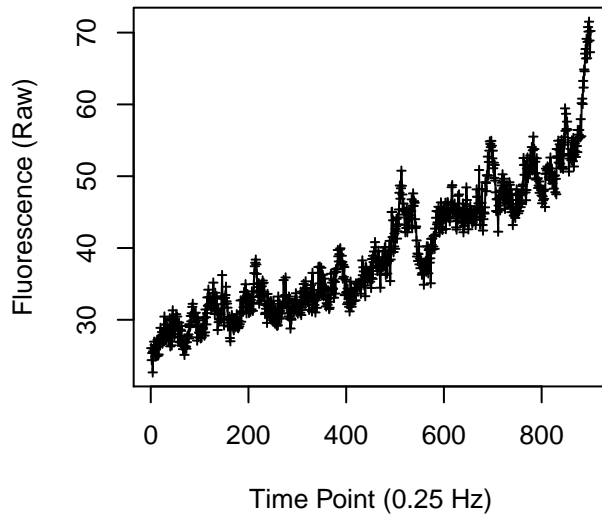

**Cell 1607**

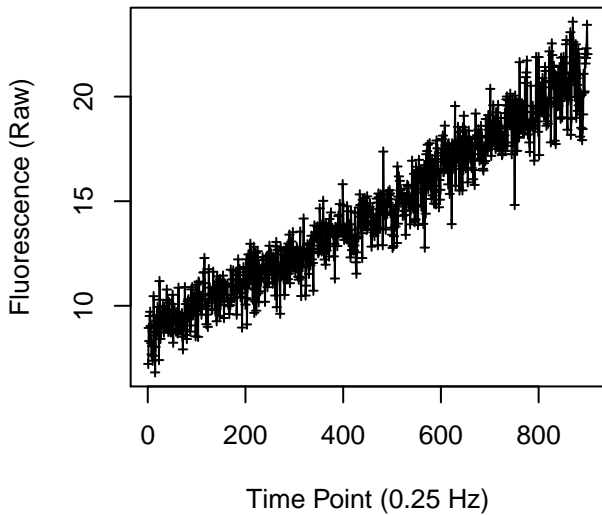

**Cell 1608**

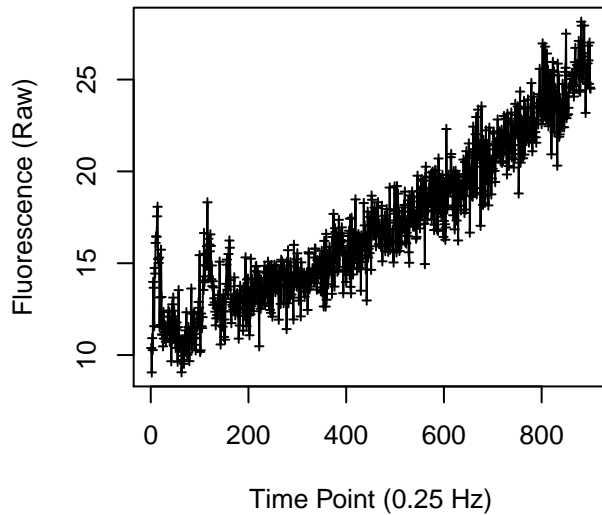



**Cell 1609**

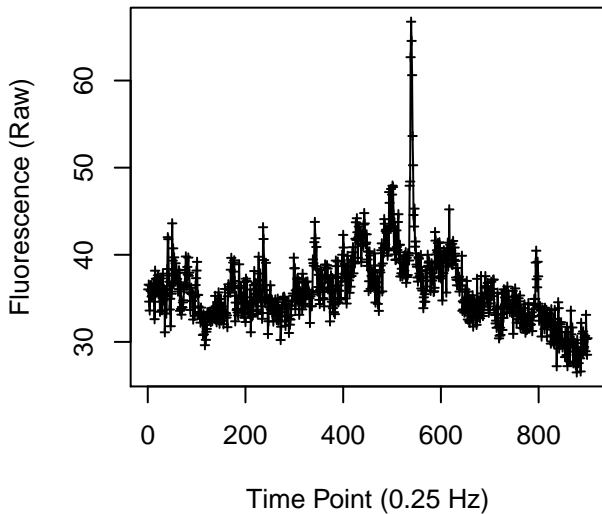

**Cell 1610**

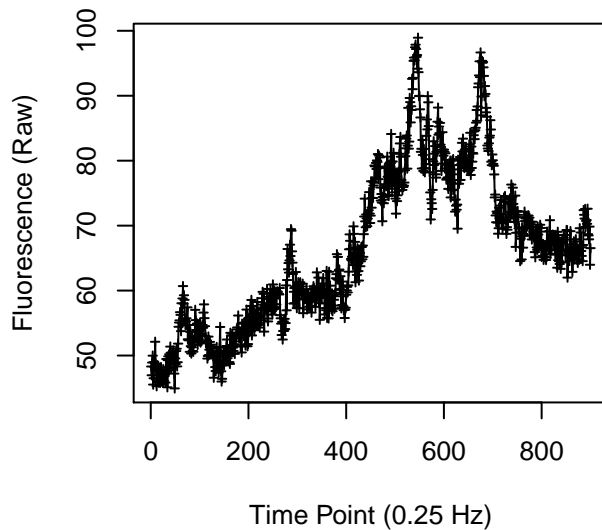

**Cell 1611**

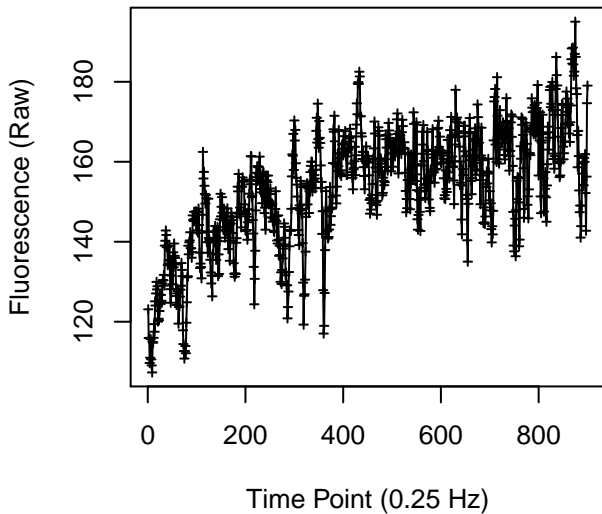

**Cell 1612**

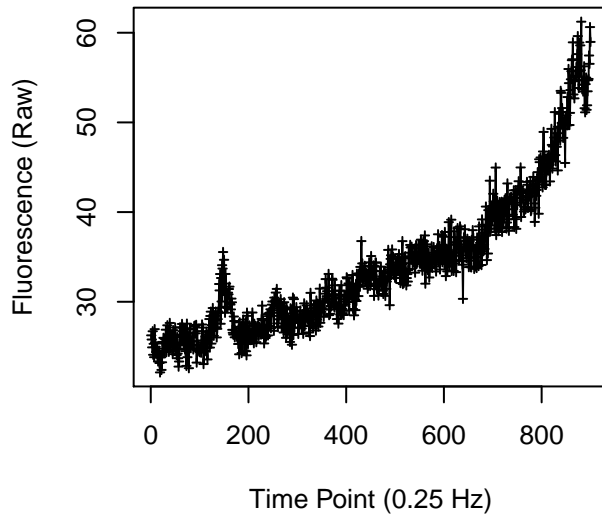

**Cell 1613**

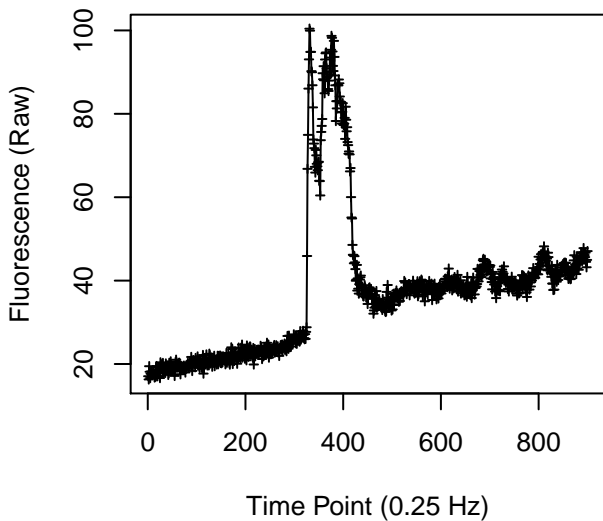

**Cell 1614**

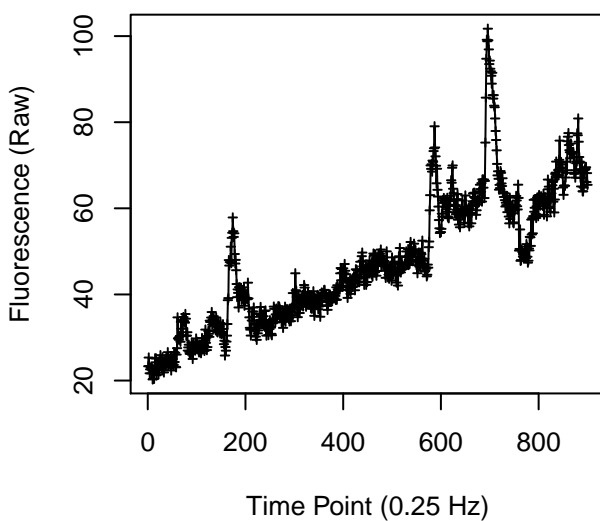

**Cell 1615**

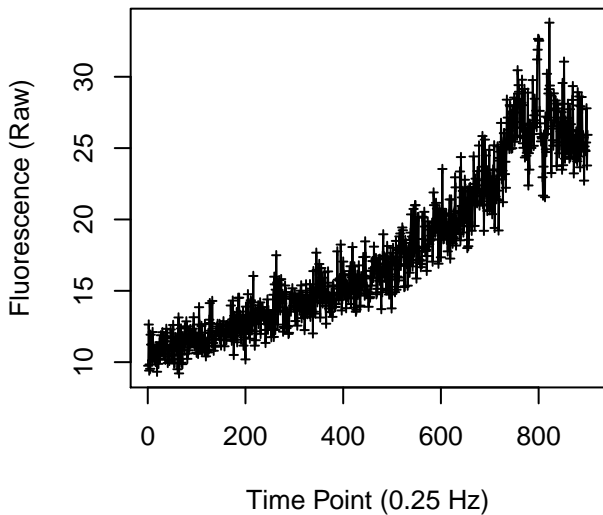

**Cell 1616**

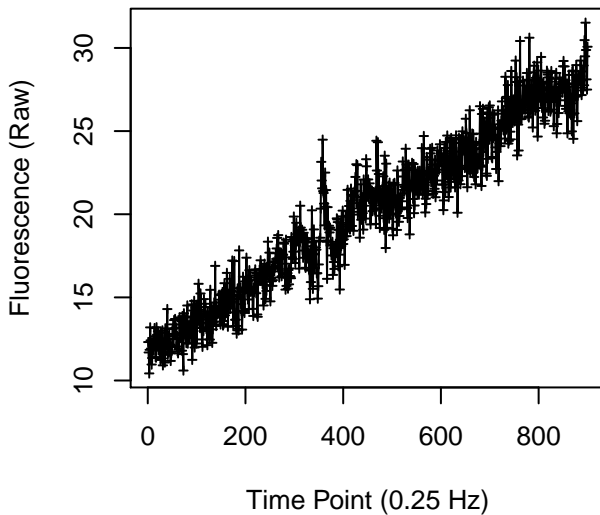

**Cell 1617**

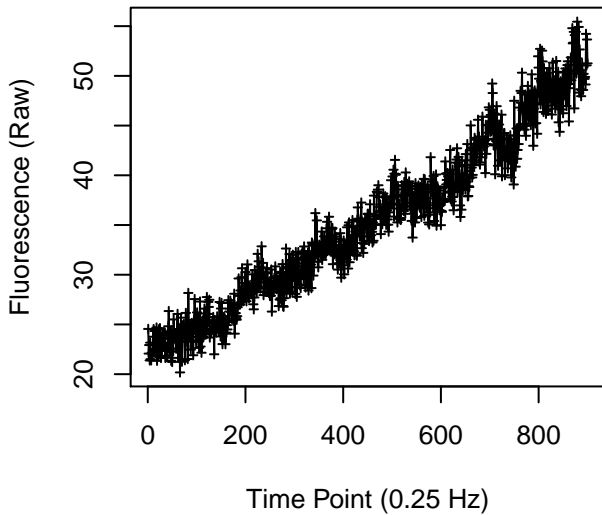

**Cell 1618**

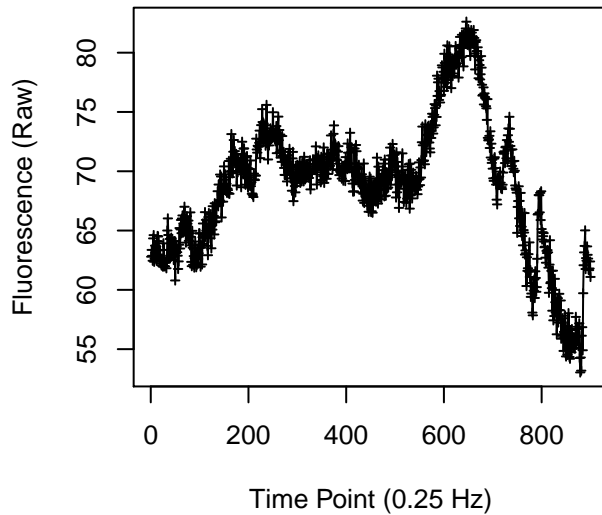

**Cell 1619**

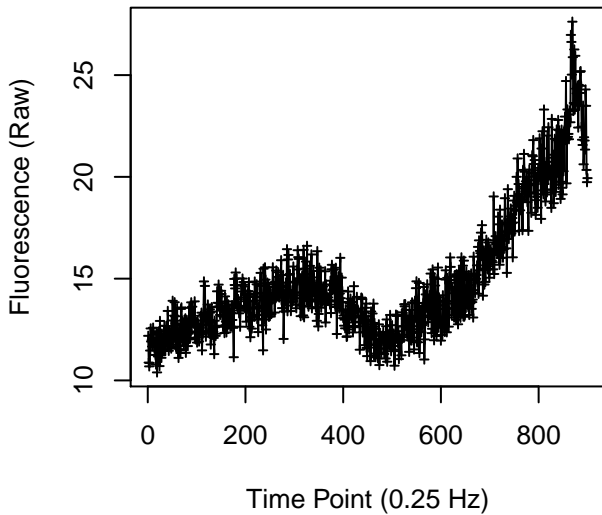

**Cell 1620**

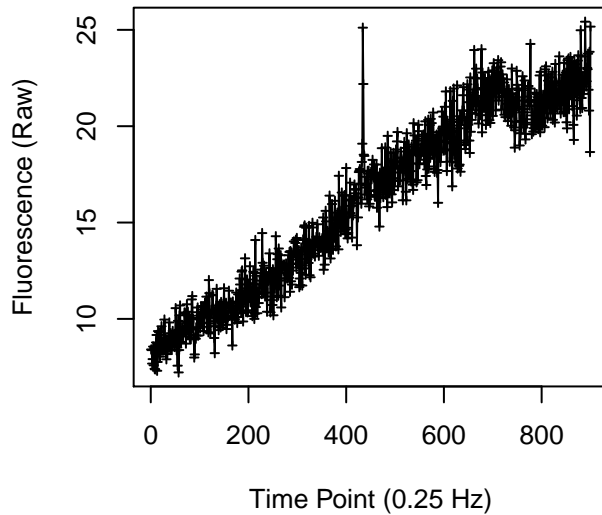

**Cell 1621**

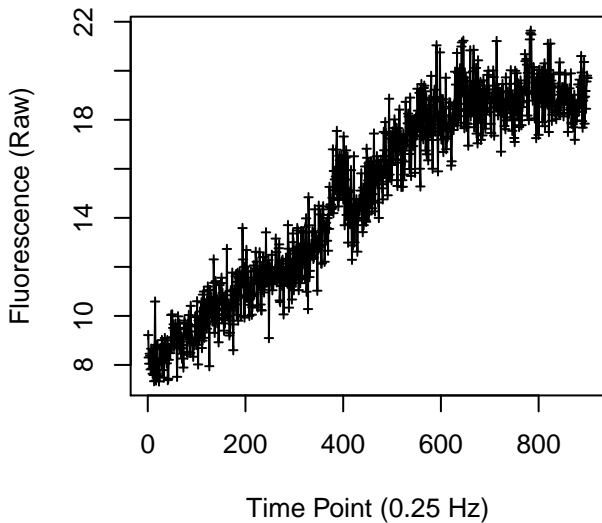

**Cell 1622**

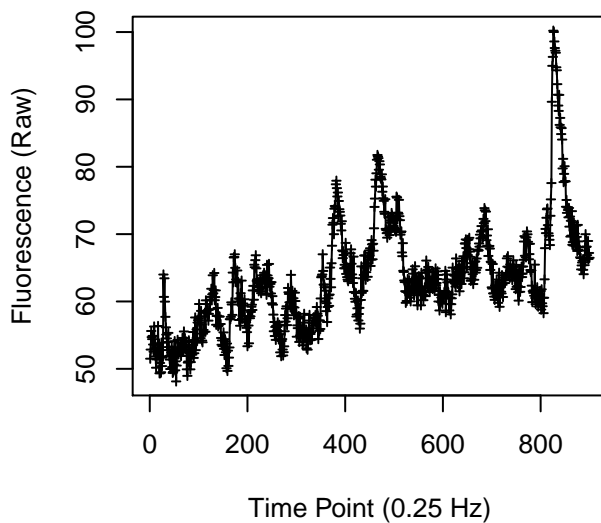

**Cell 1623**

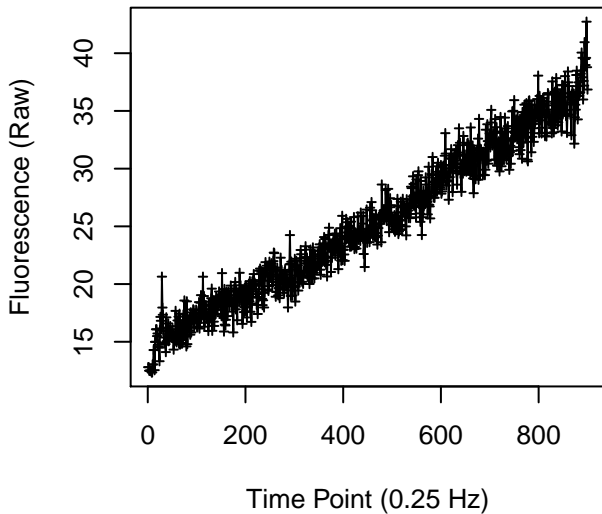

**Cell 1624**

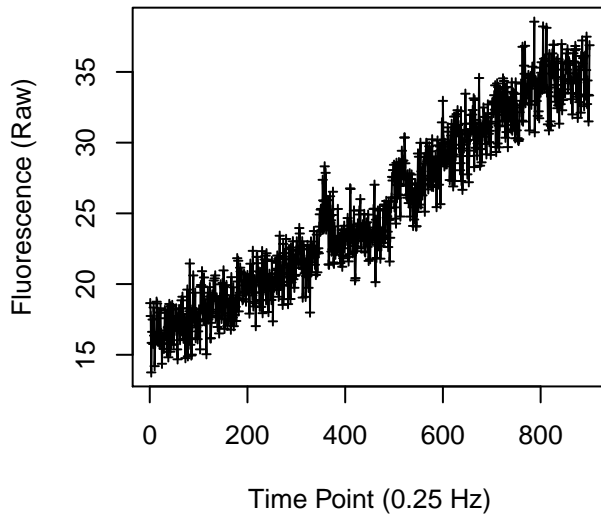

**Cell 1625**

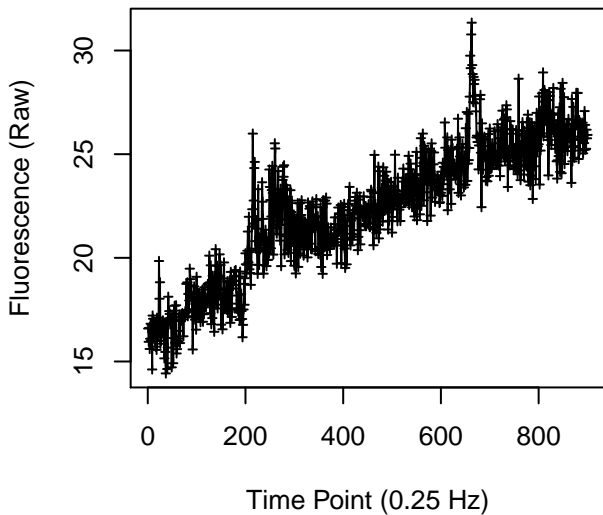

**Cell 1626**

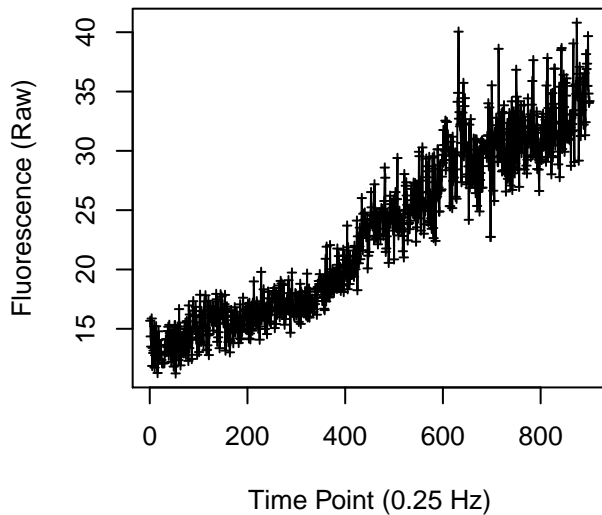

**Cell 1627**

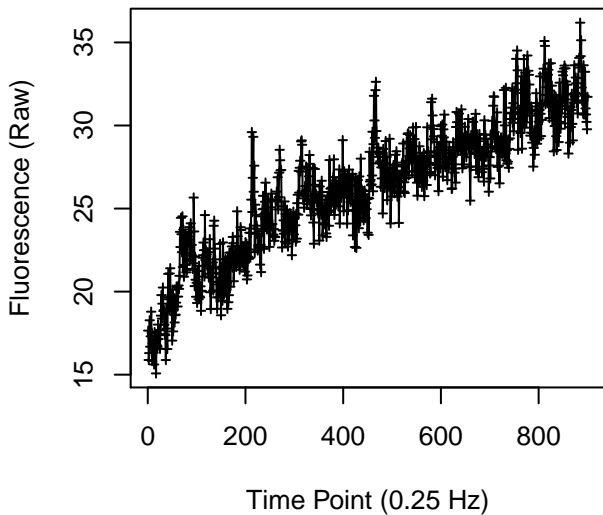

**Cell 1628**

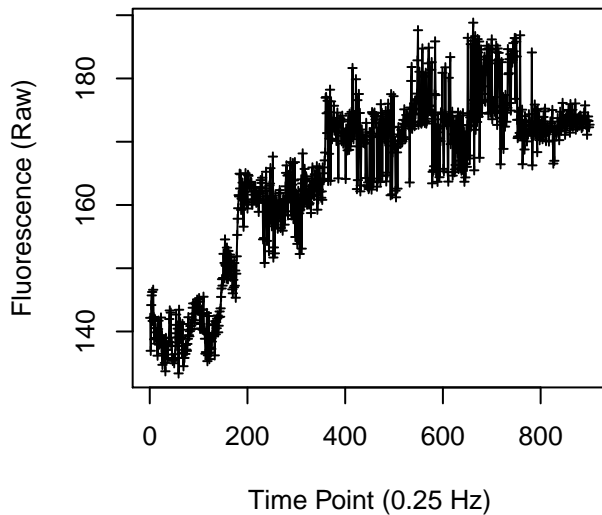

**Cell 1629**

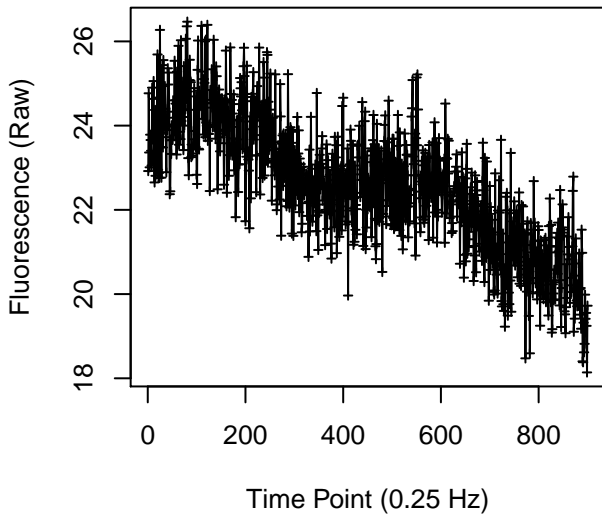

**Cell 1630**

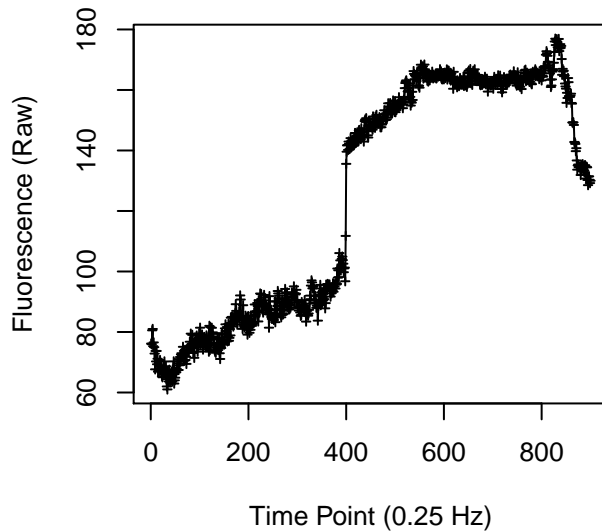

**Cell 1631**

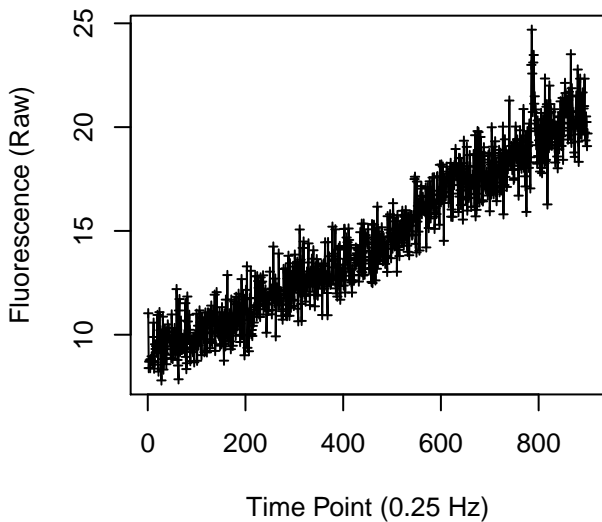

**Cell 1632**

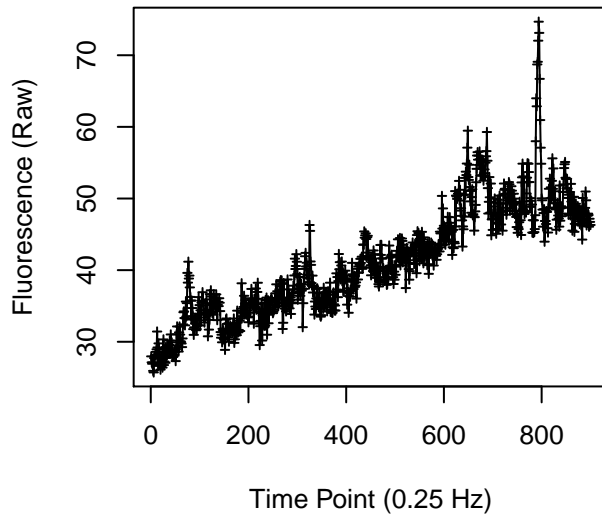

**Cell 1633**

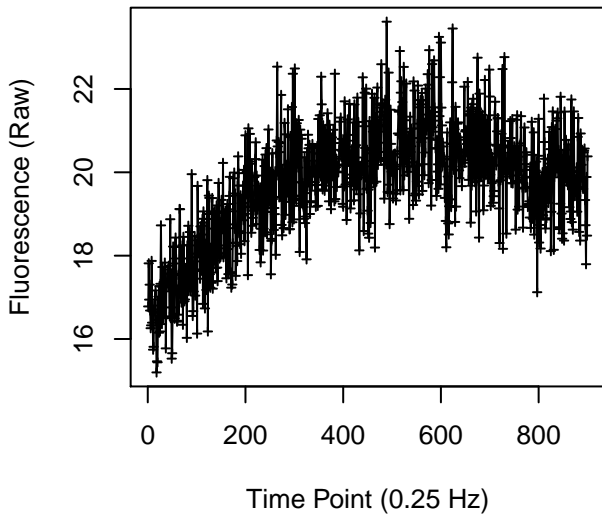

**Cell 1634**

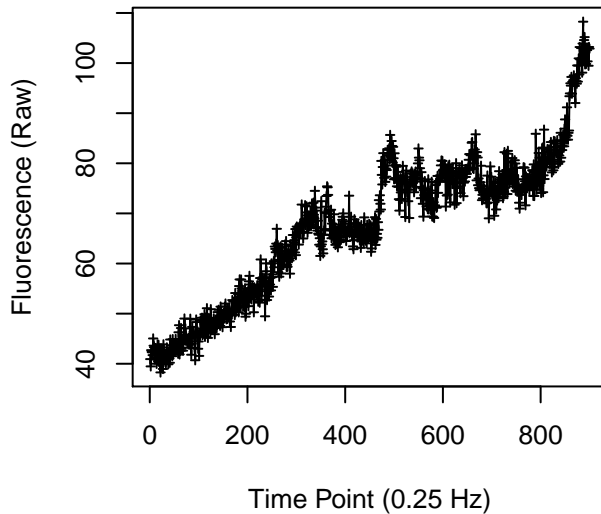

**Cell 1635**

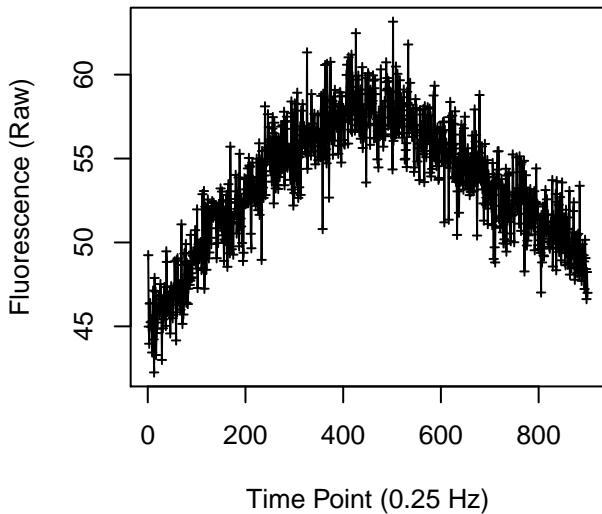

**Cell 1636**

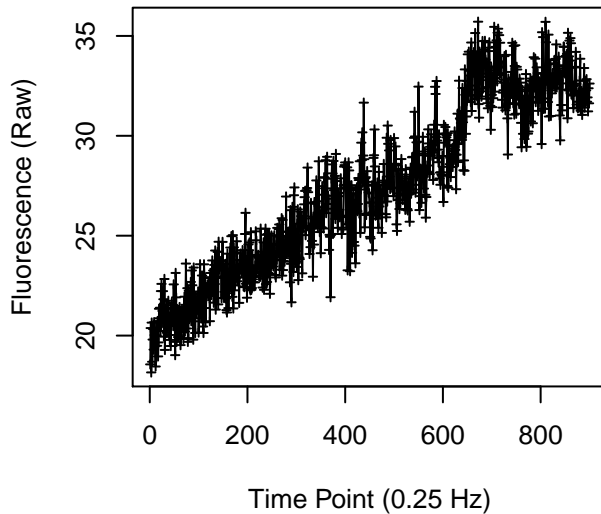

**Cell 1637**

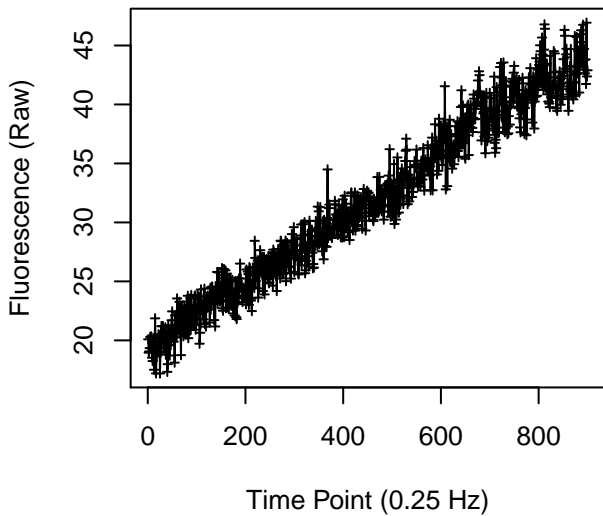

**Cell 1638**

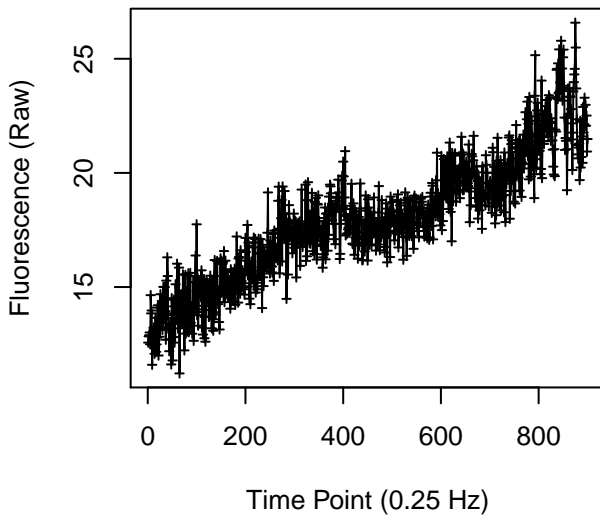

**Cell 1639**

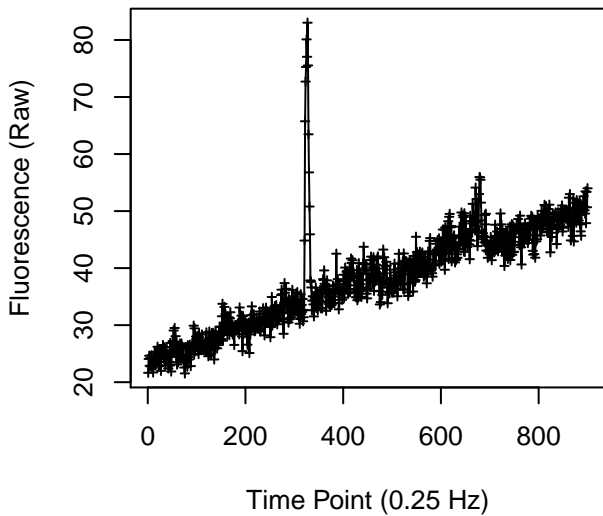

**Cell 1640**

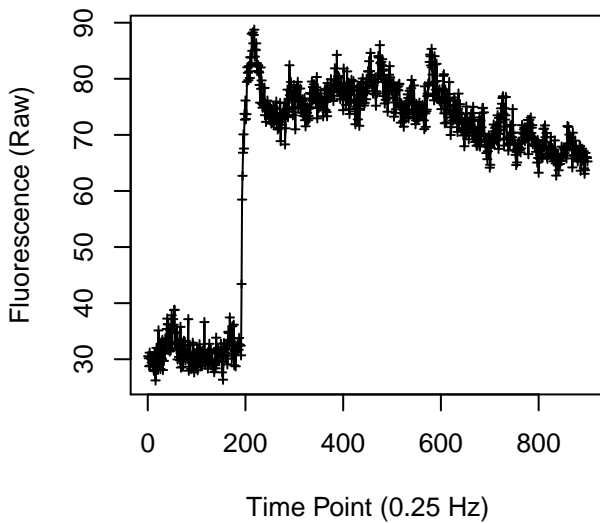



**Cell 1641**

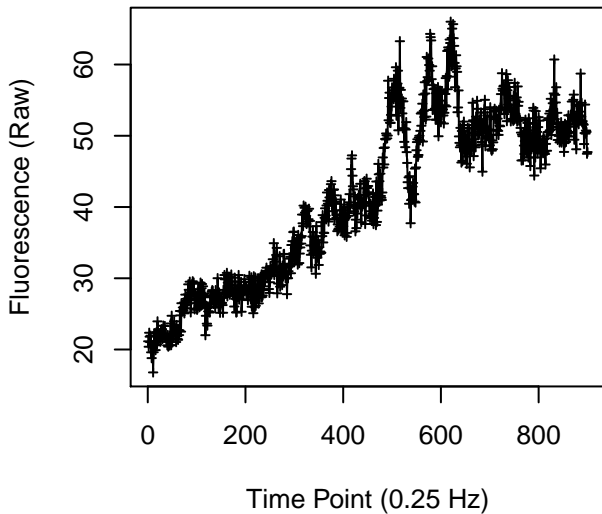

**Cell 1642**

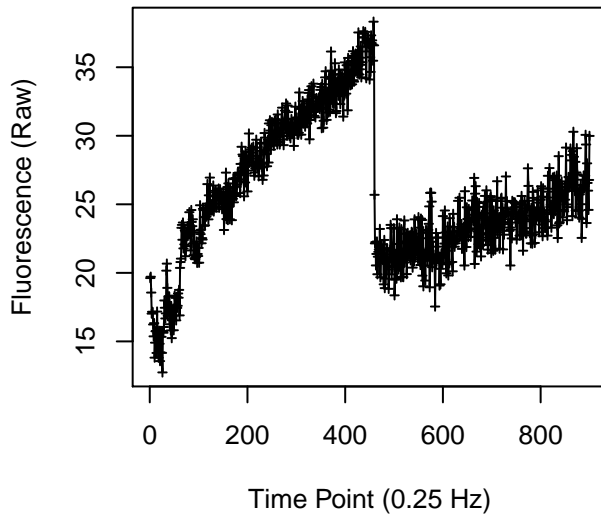

**Cell 1643**

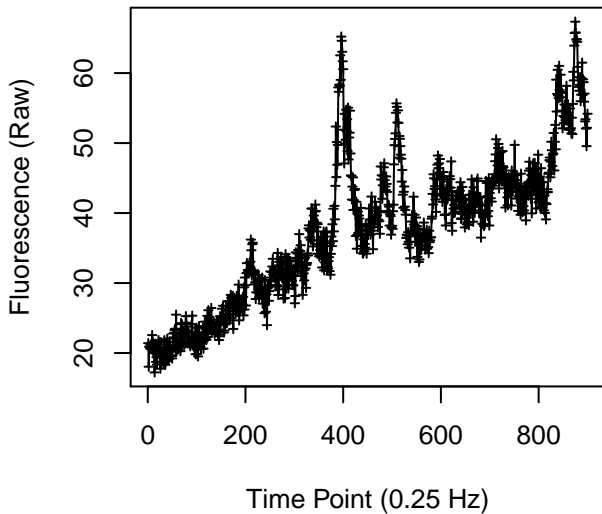

**Cell 1644**

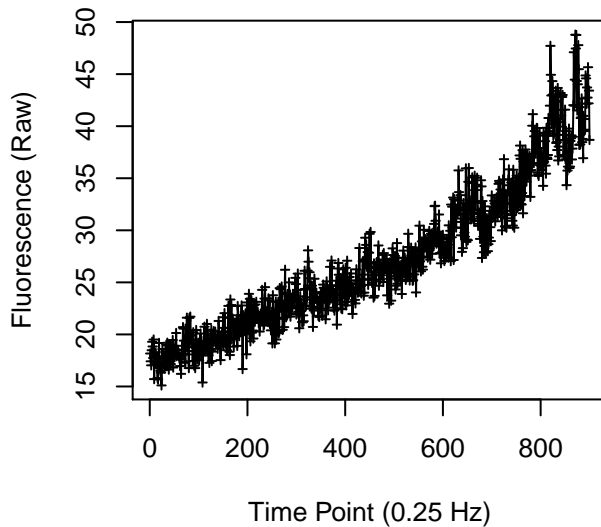

**Cell 1645**

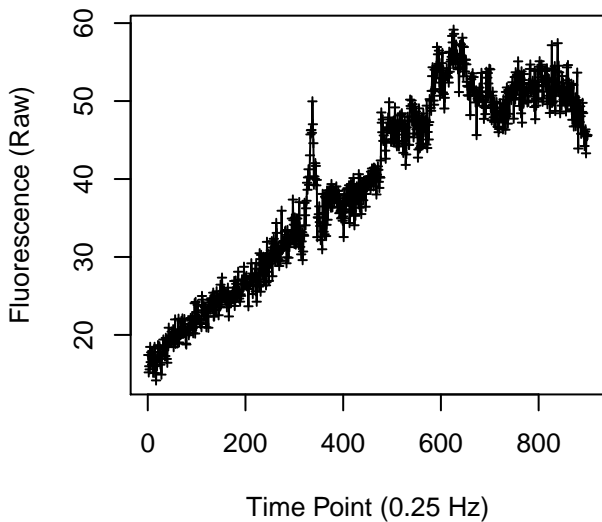

**Cell 1646**

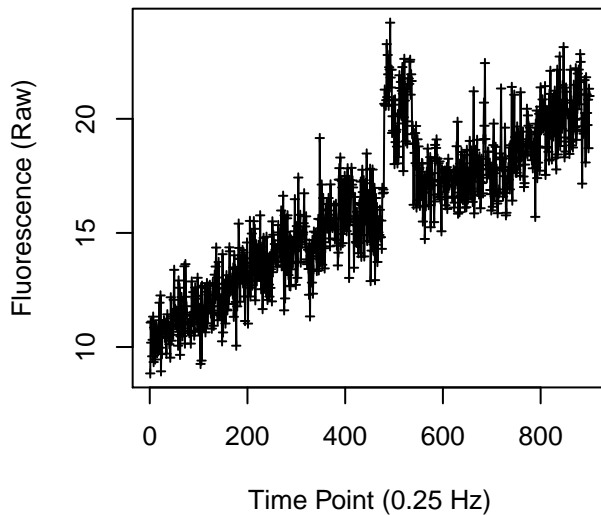

**Cell 1647**

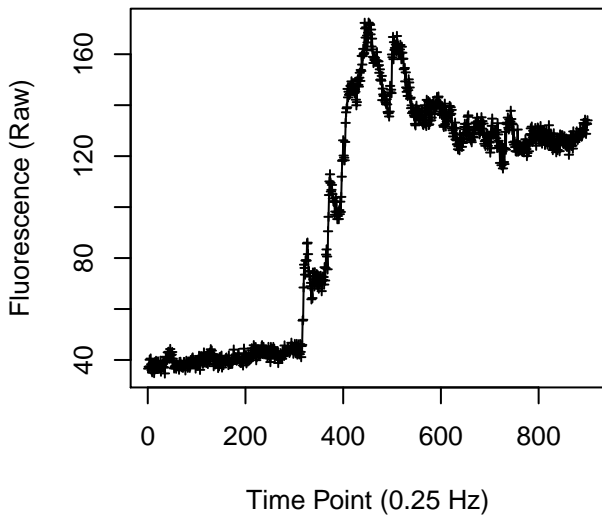

**Cell 1648**

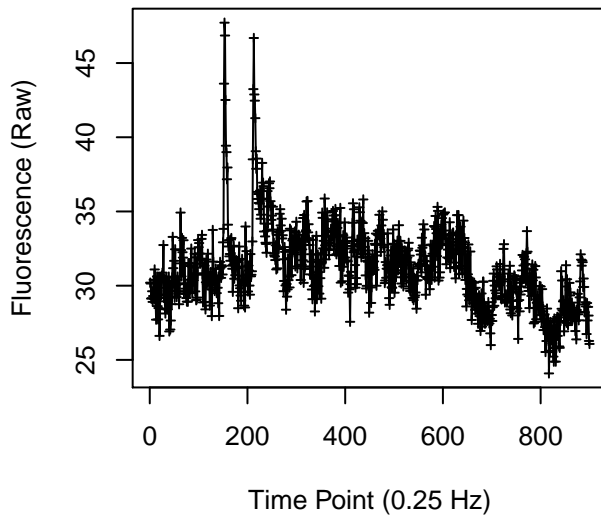

**Cell 1649**

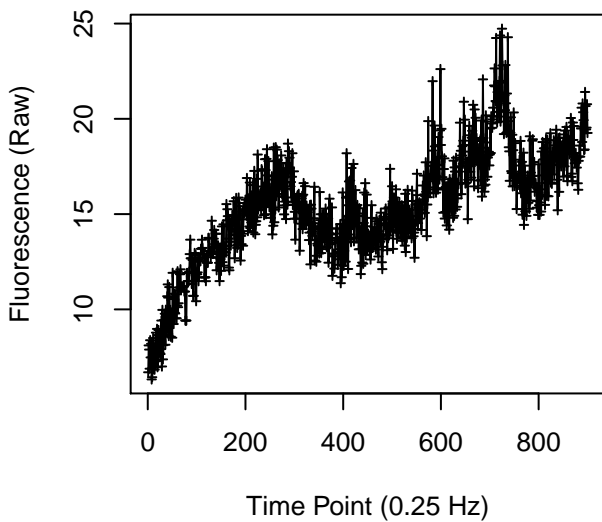

**Cell 1650**

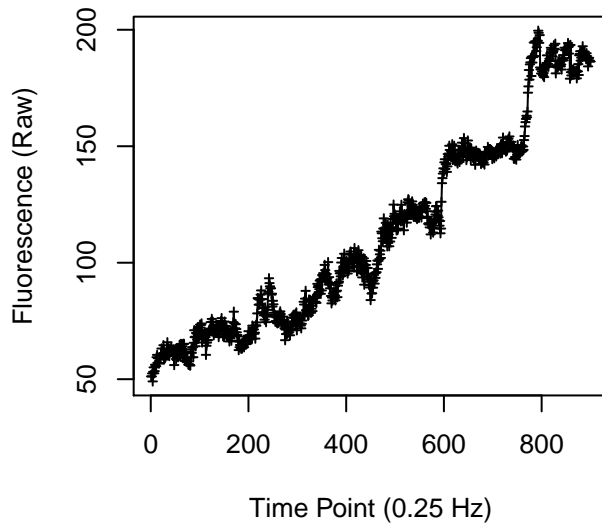

**Cell 1651**

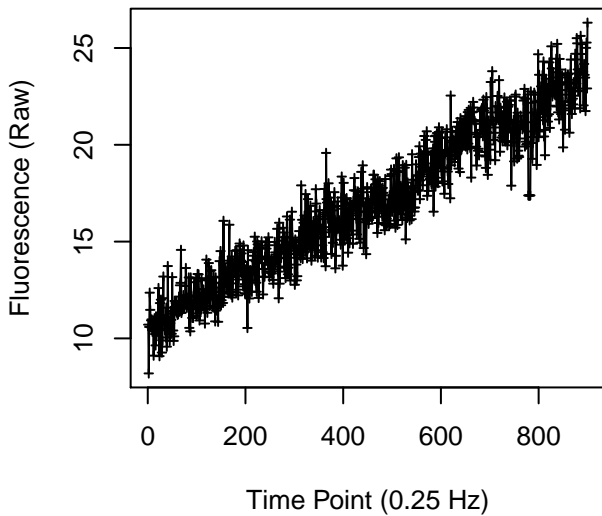

**Cell 1652**

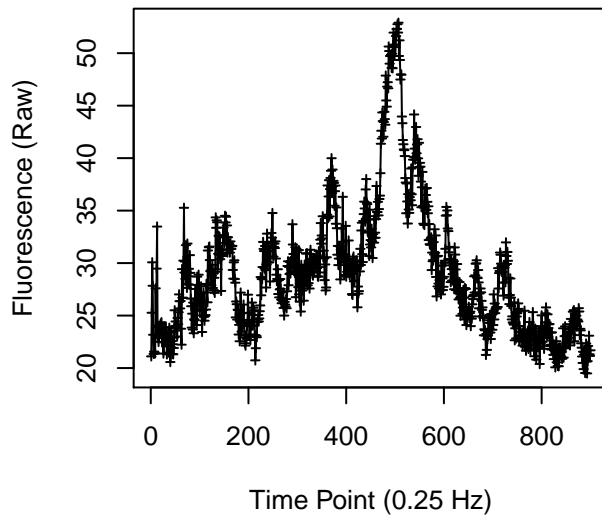

**Cell 1653**

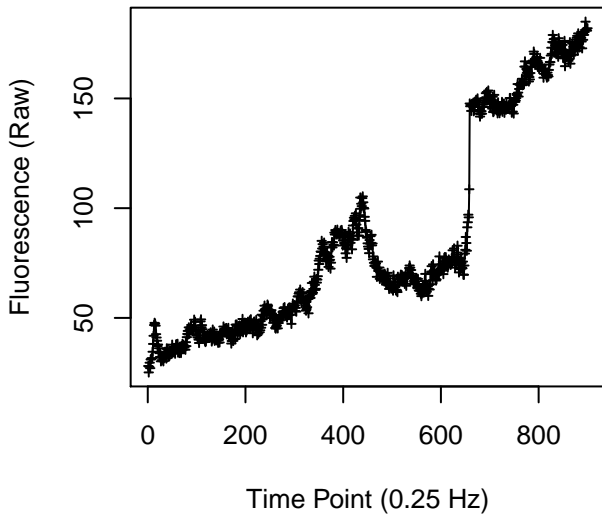

**Cell 1654**

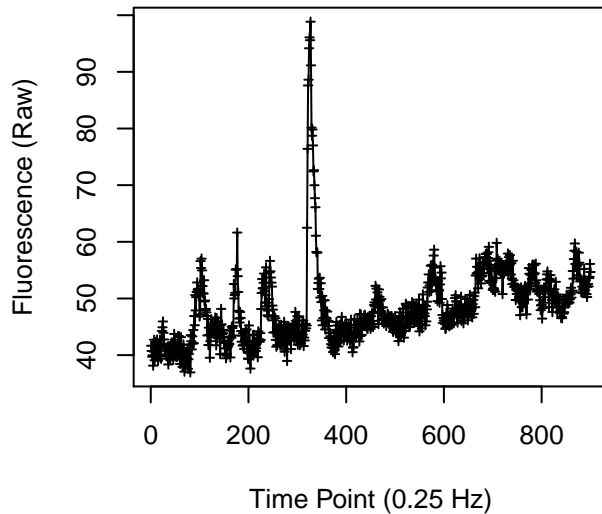

**Cell 1655**

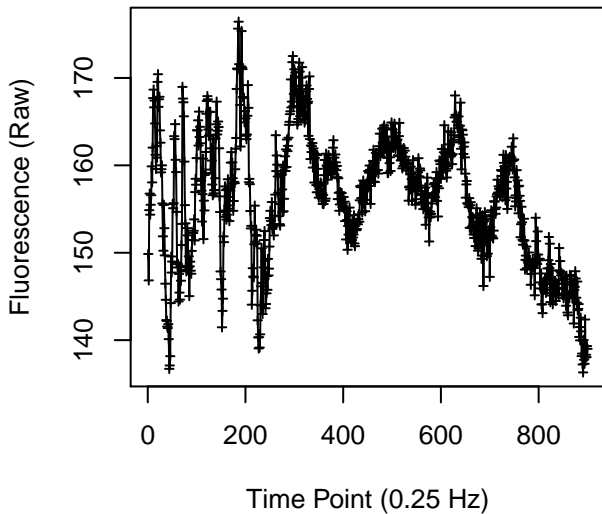

**Cell 1656**

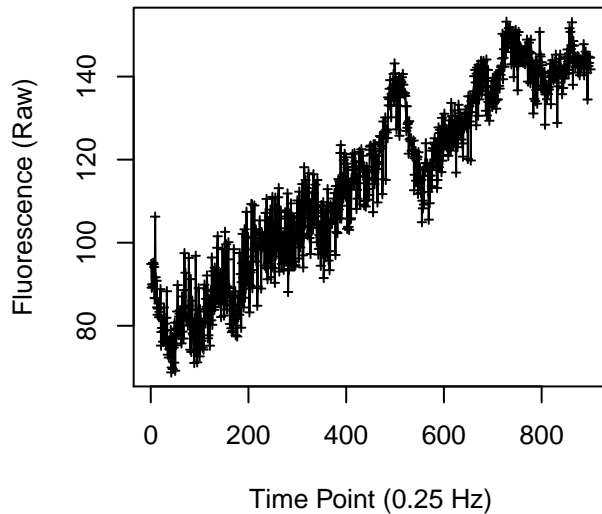

**Cell 1657**

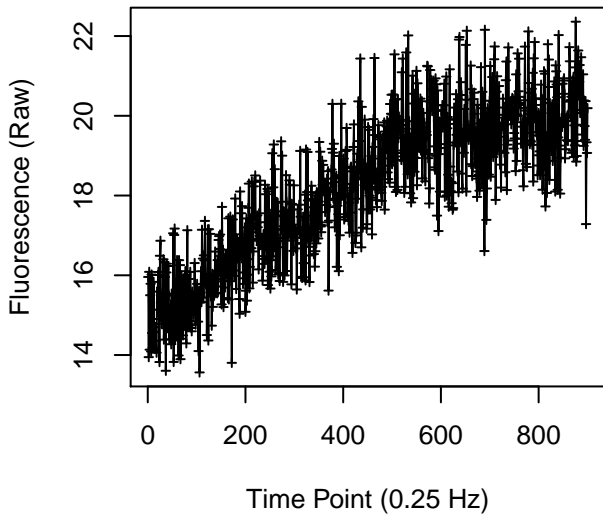

**Cell 1658**

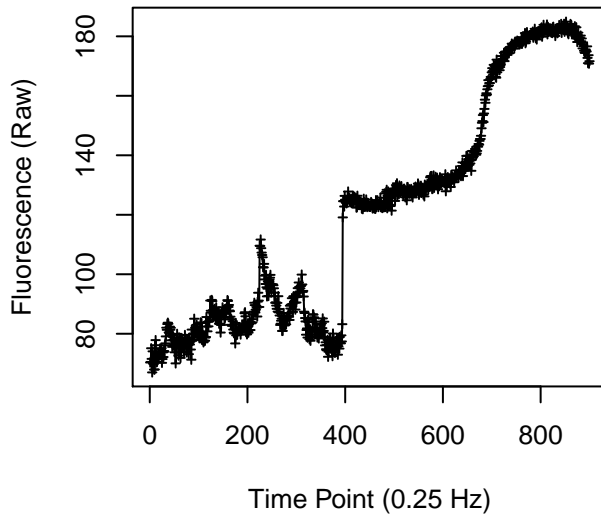

**Cell 1659**

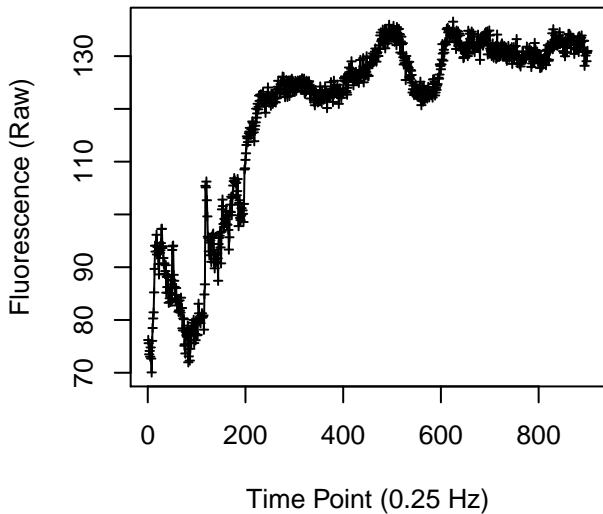

**Cell 1660**

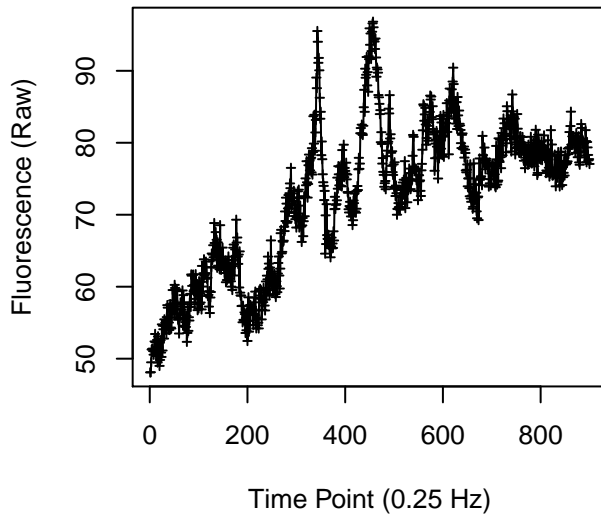

**Cell 1661**

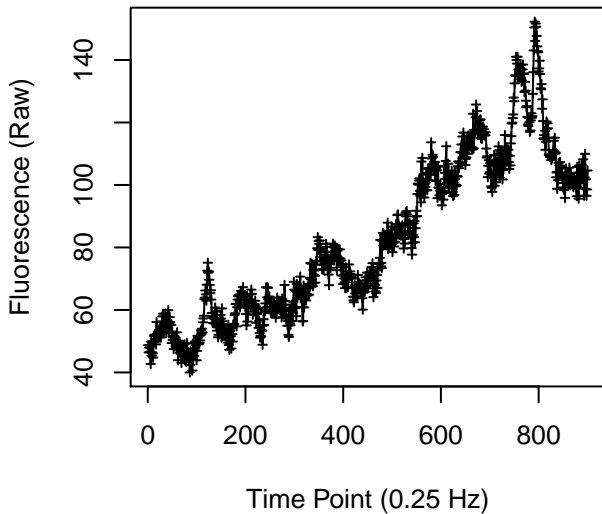

**Cell 1662**

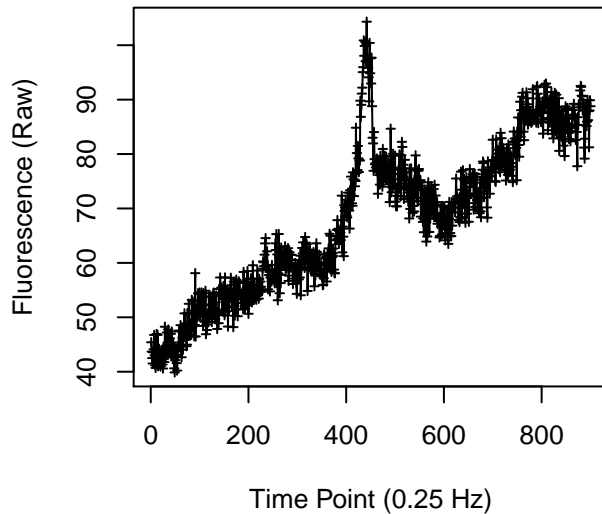

**Cell 1663**

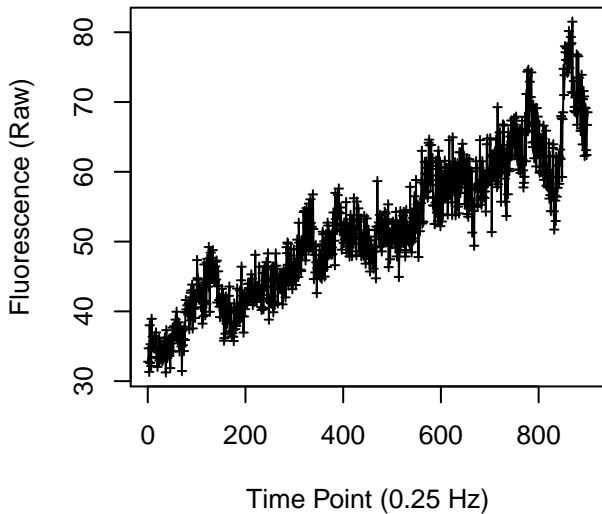

**Cell 1664**

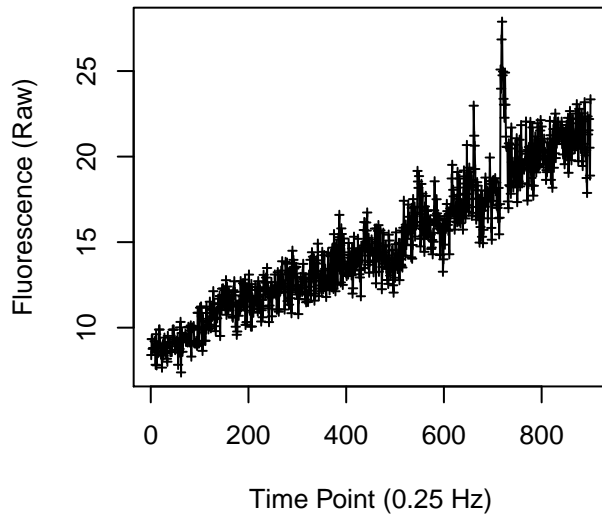

**Cell 1665**

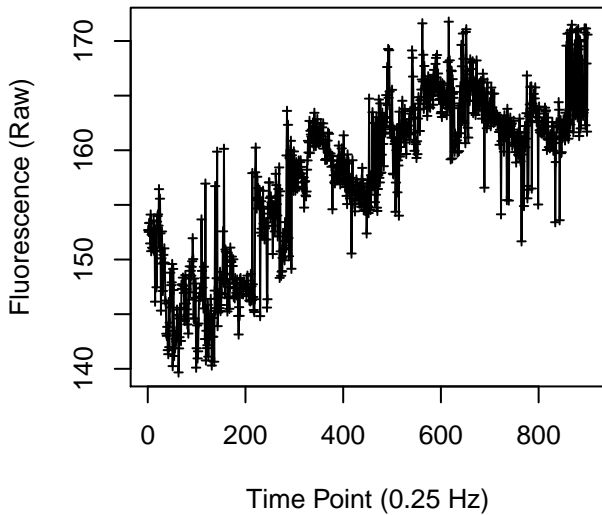

**Cell 1666**

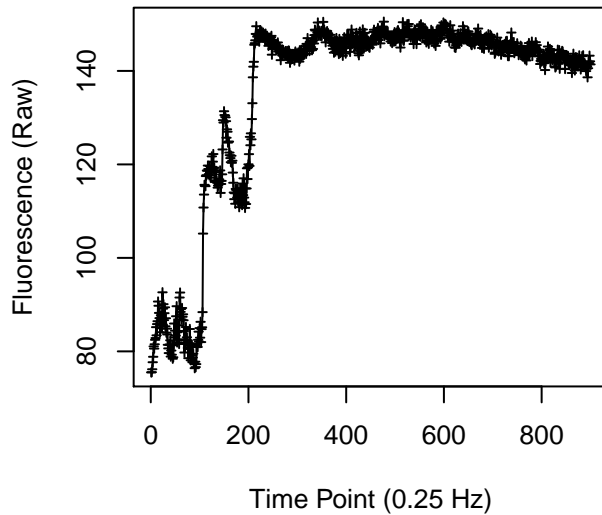

**Cell 1667**

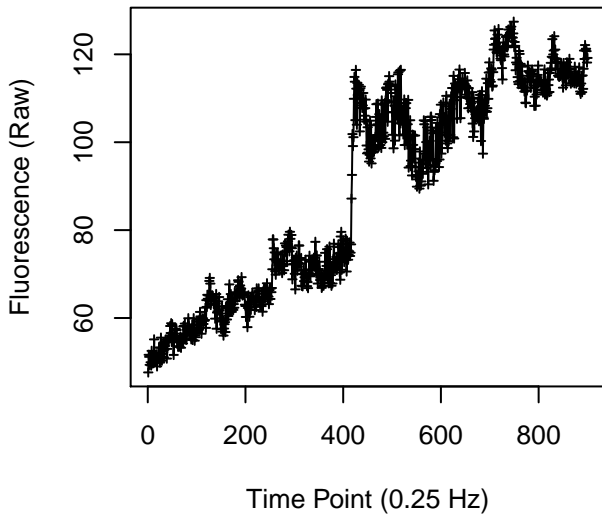

**Cell 1668**

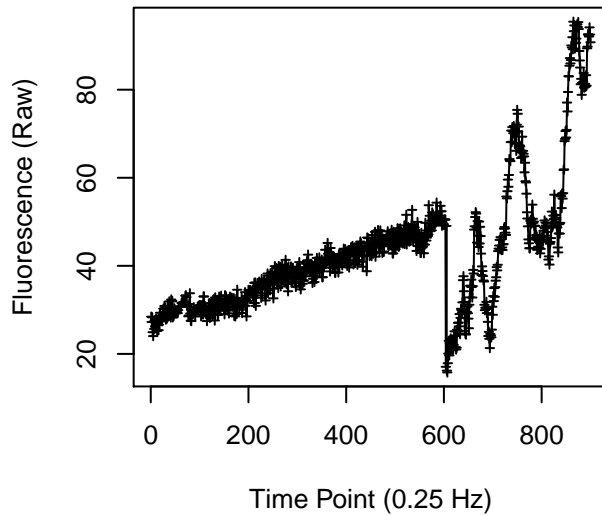

**Cell 1669**

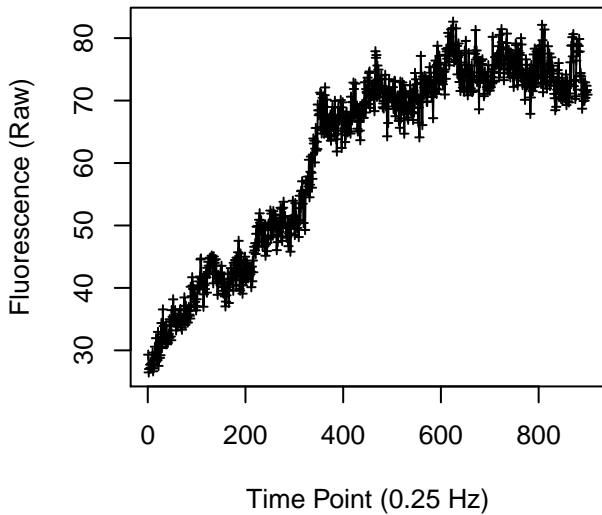

**Cell 1670**

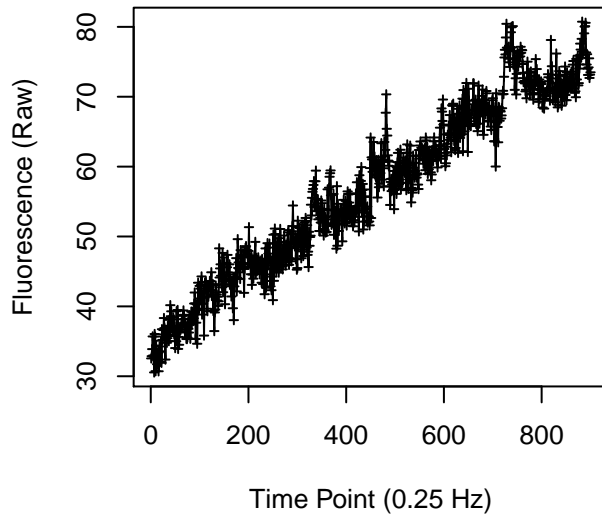

**Cell 1671**

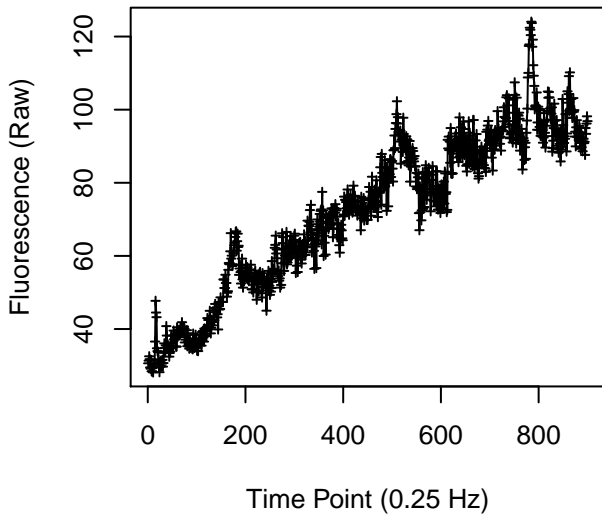

**Cell 1672**

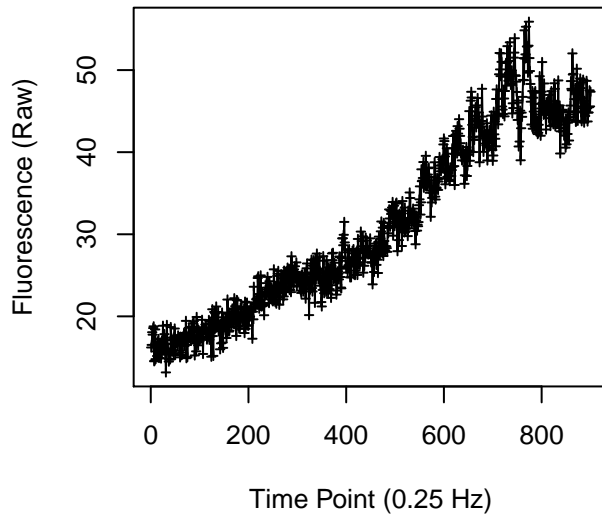



**Cell 1673**

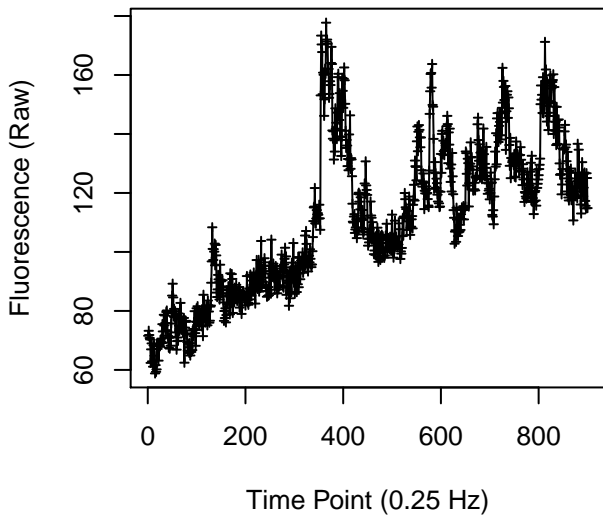

**Cell 1674**

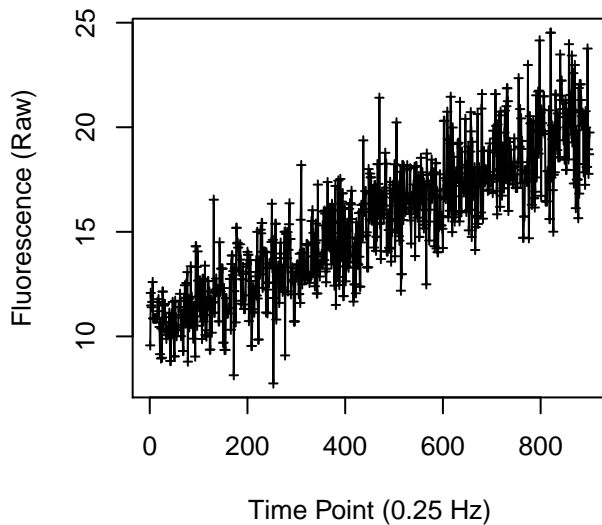

**Cell 1675**

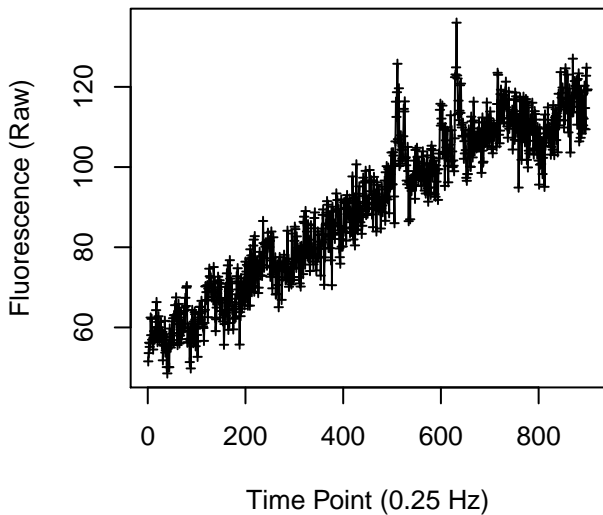

**Cell 1676**

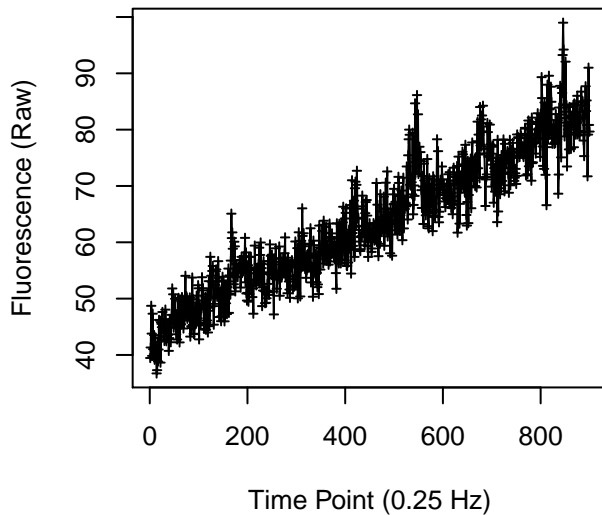

**Cell 1677**

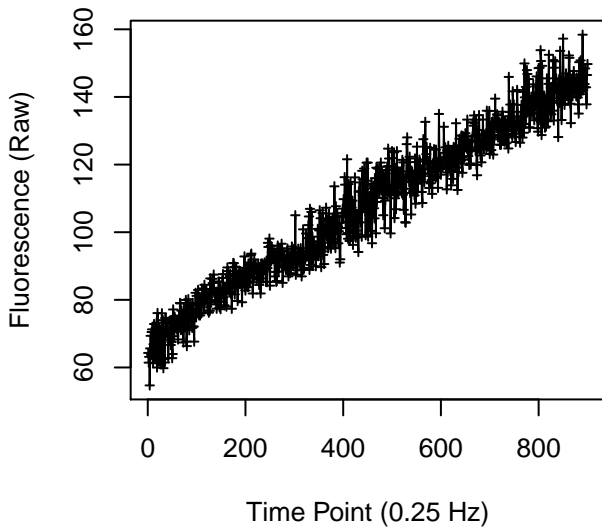

**Cell 1678**

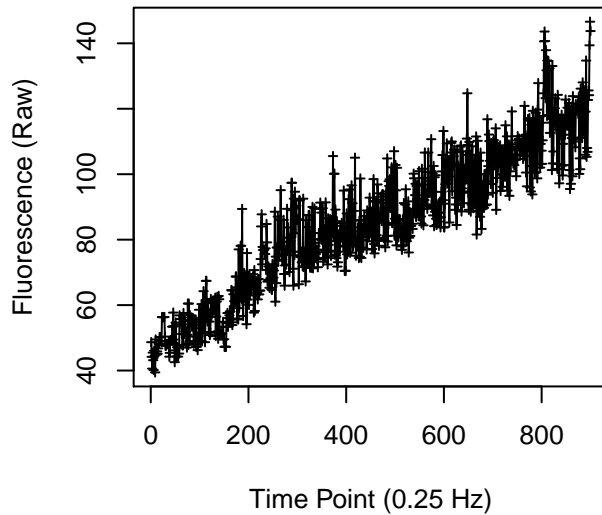

**Cell 1679**

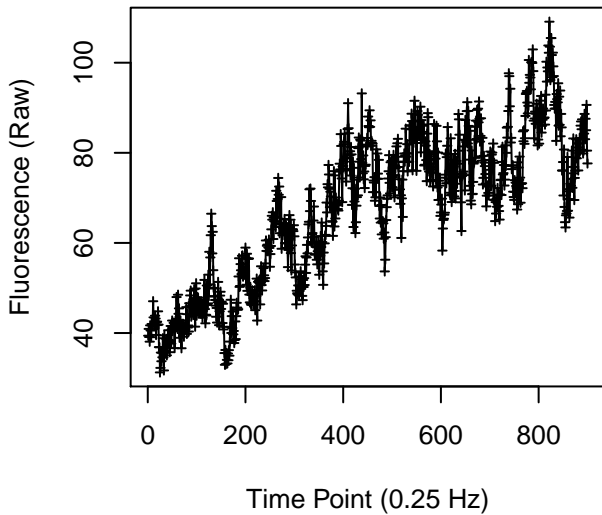

**Cell 1680**

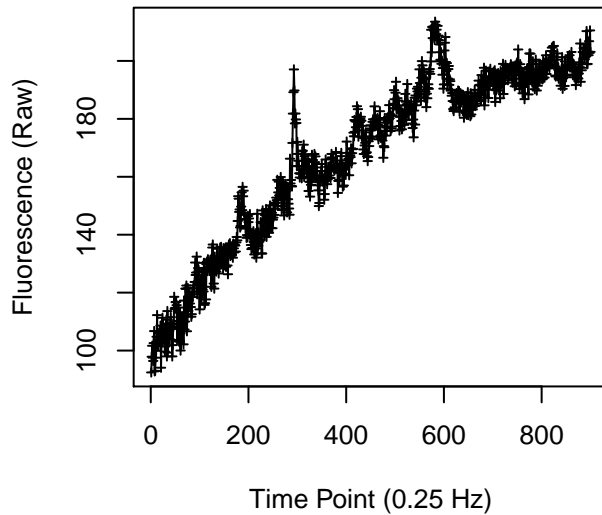

**Cell 1681**

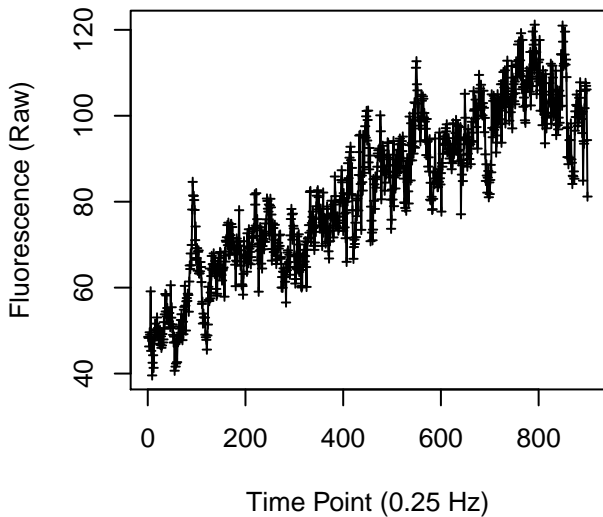

**Cell 1682**

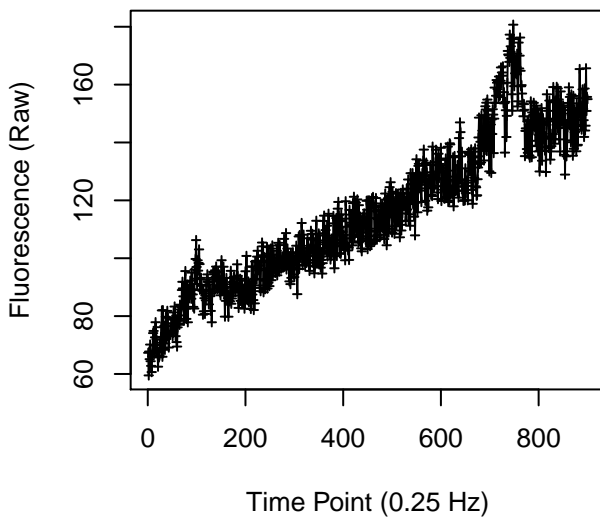

**Cell 1683**

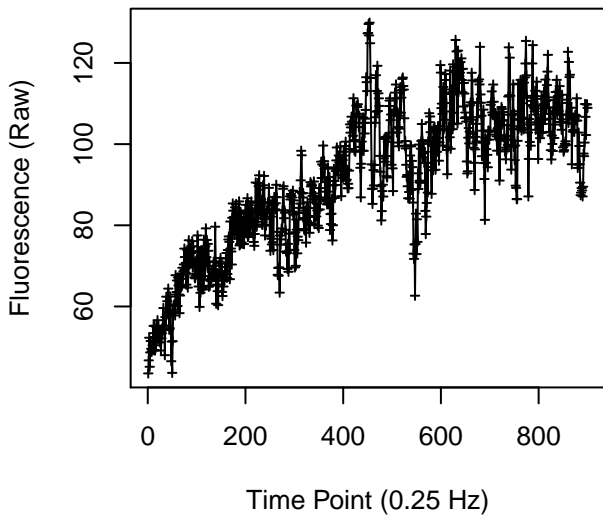

**Cell 1684**

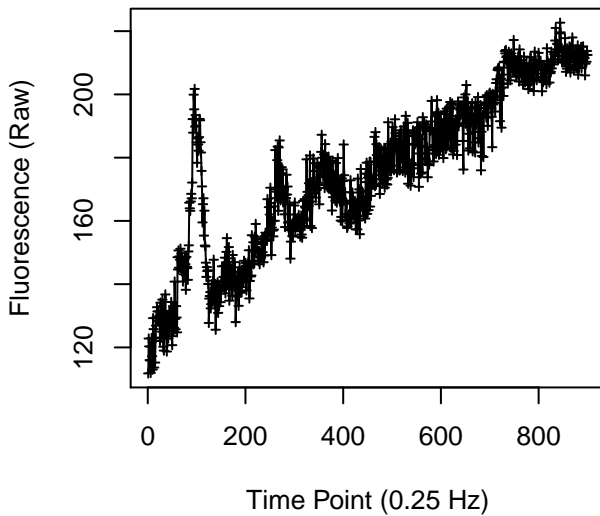

**Cell 1685**

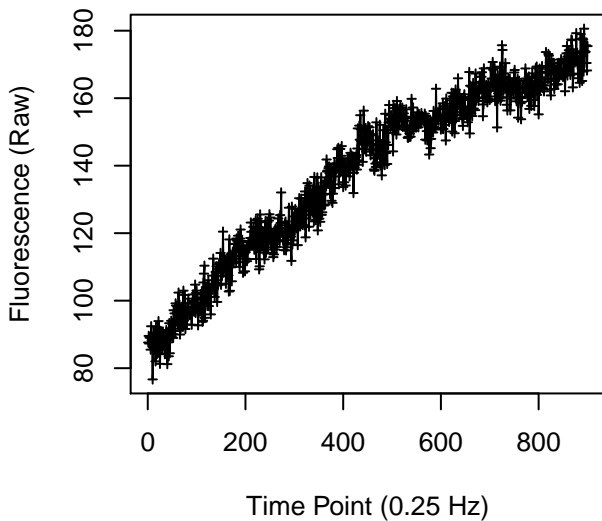

**Cell 1686**

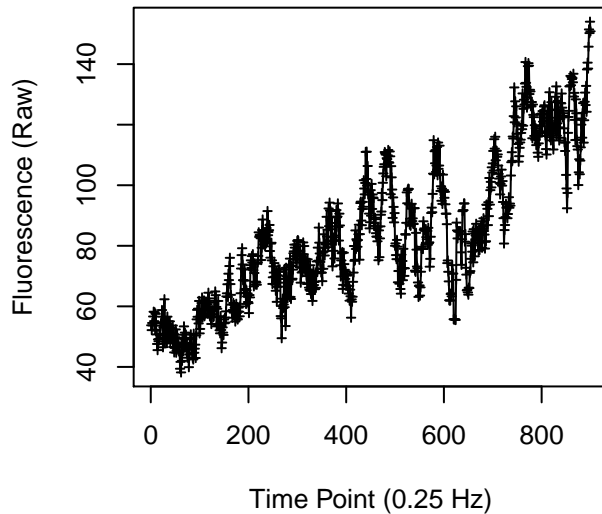

**Cell 1687**

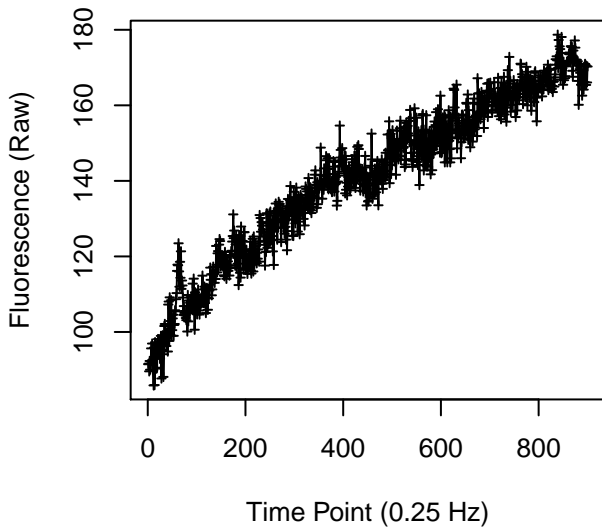

**Cell 1688**

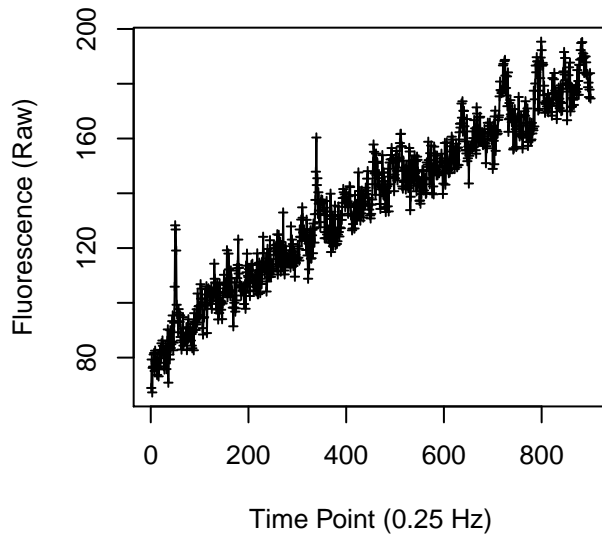

**Cell 1689**

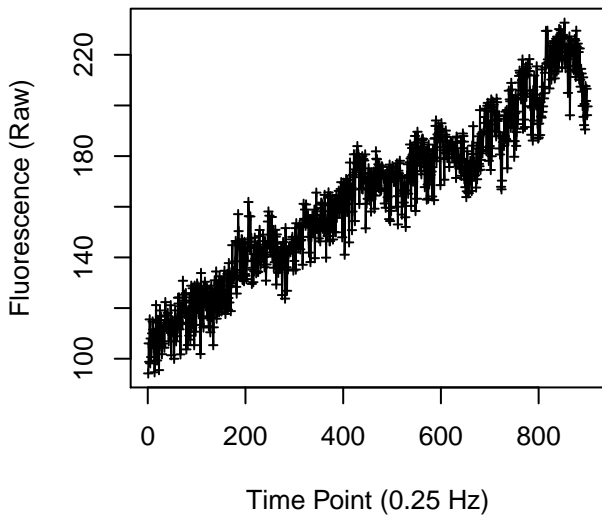

**Cell 1690**

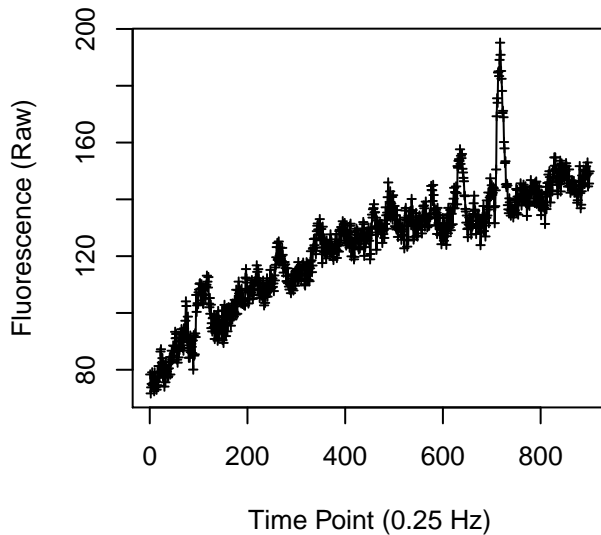

**Cell 1691**

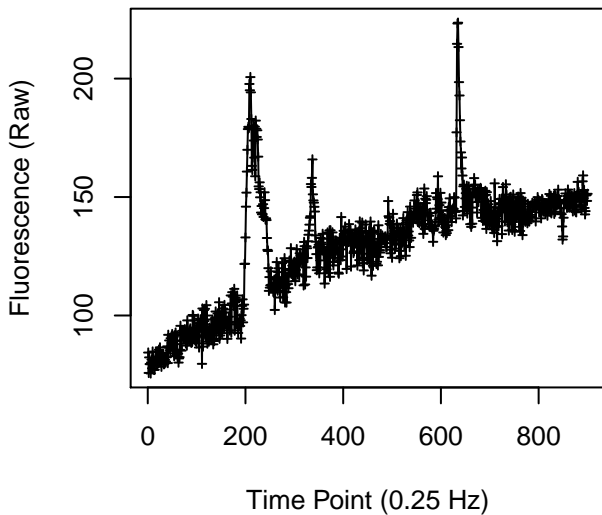

**Cell 1692**

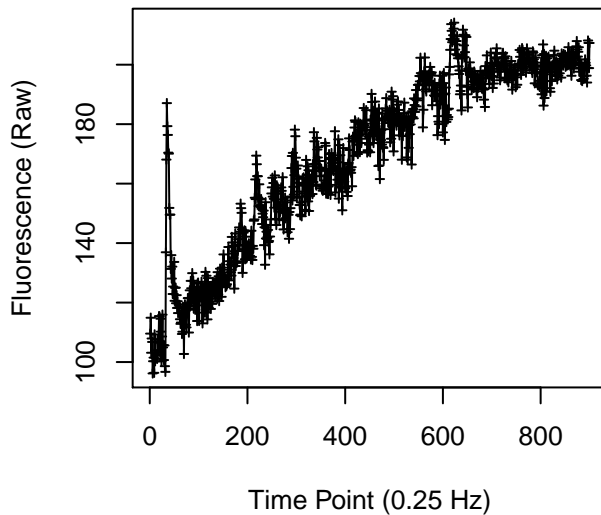

**Cell 1693**

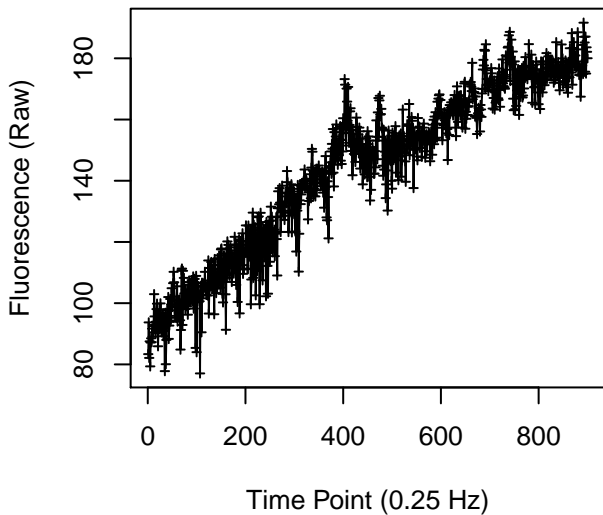

**Cell 1694**

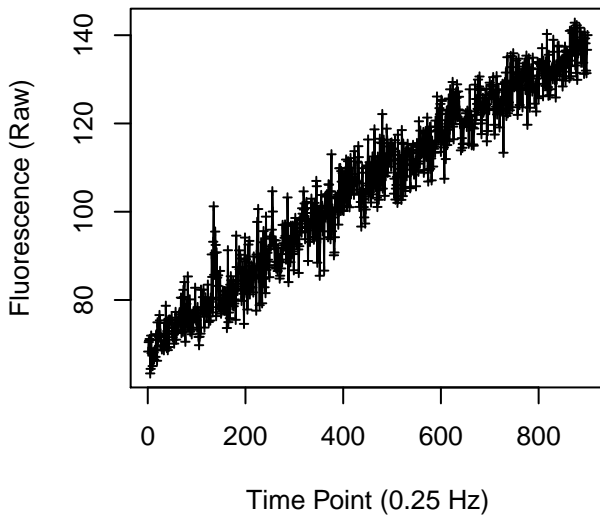

**Cell 1695**

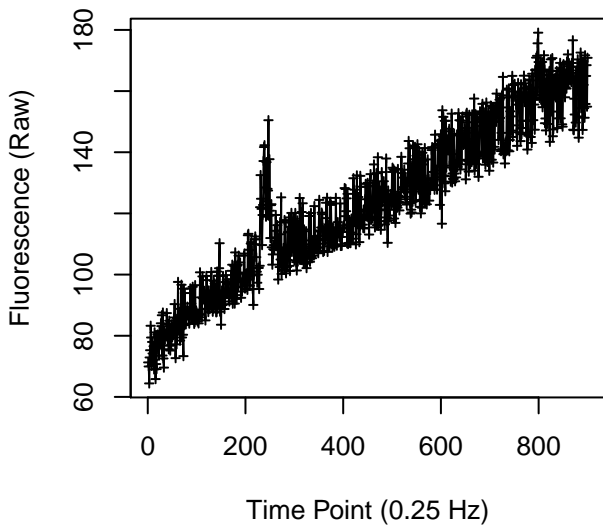

**Cell 1696**

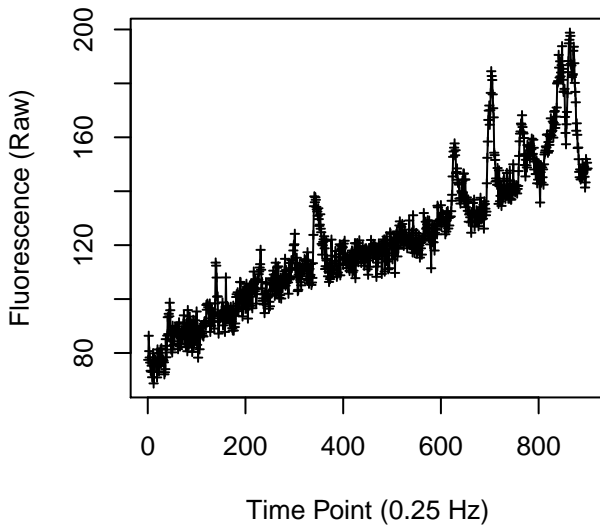

**Cell 1697**

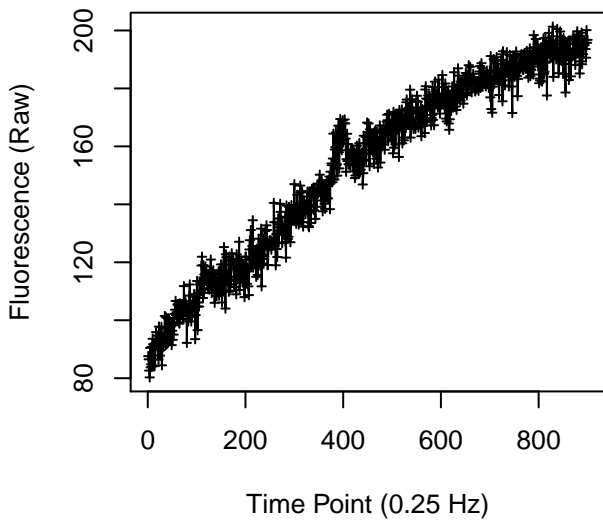

**Cell 1698**

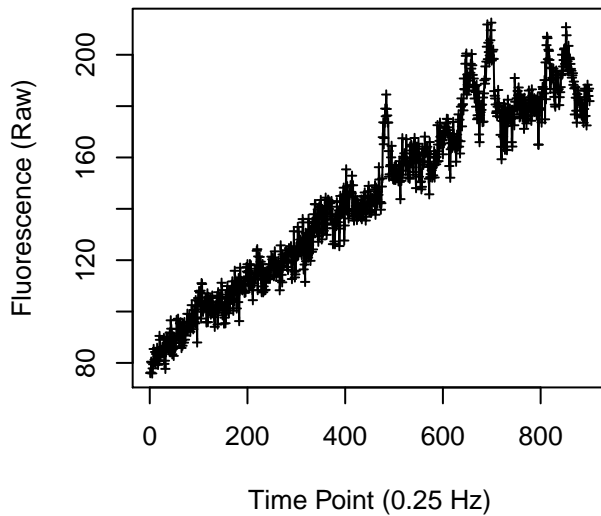

**Cell 1699**

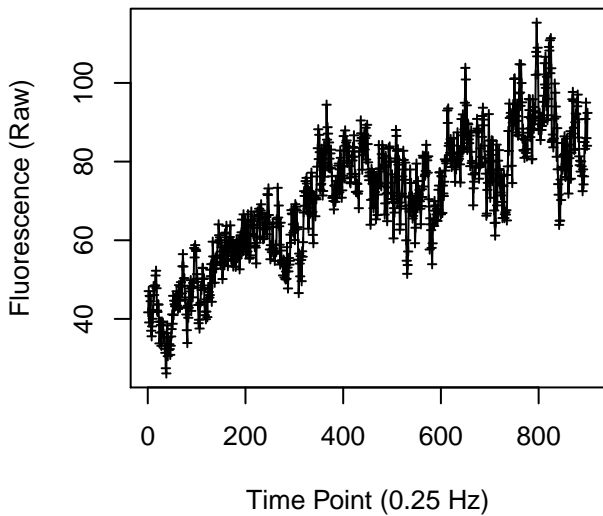

**Cell 1700**

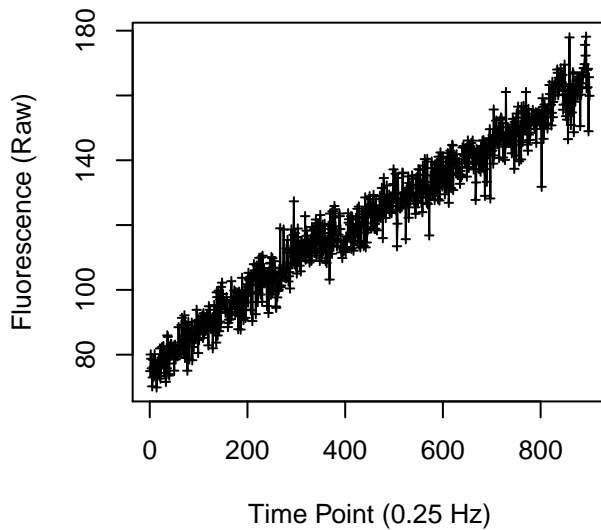

**Cell 1701**

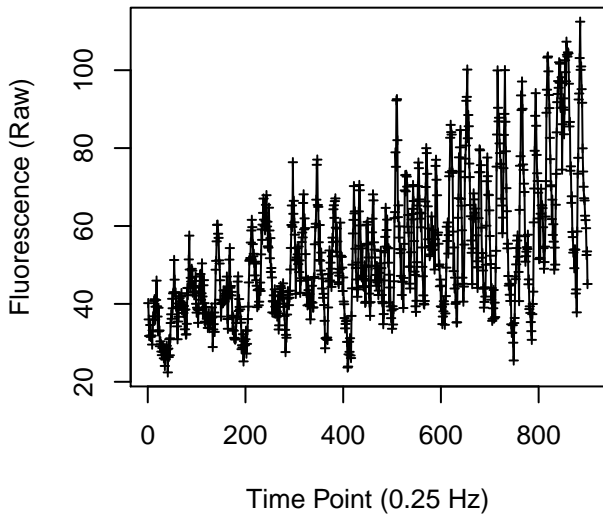

**Cell 1702**

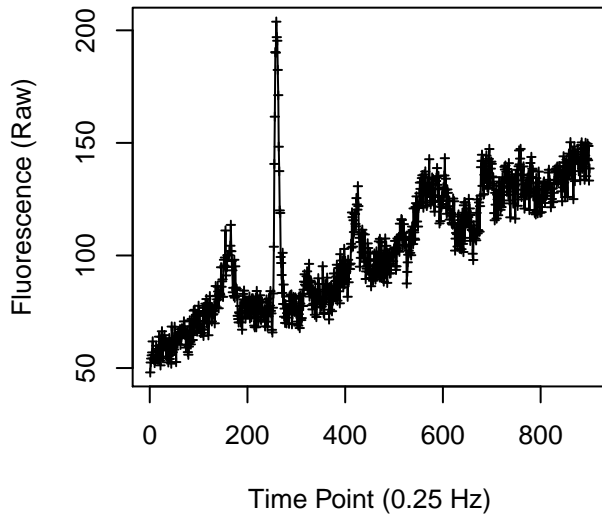

**Cell 1703**

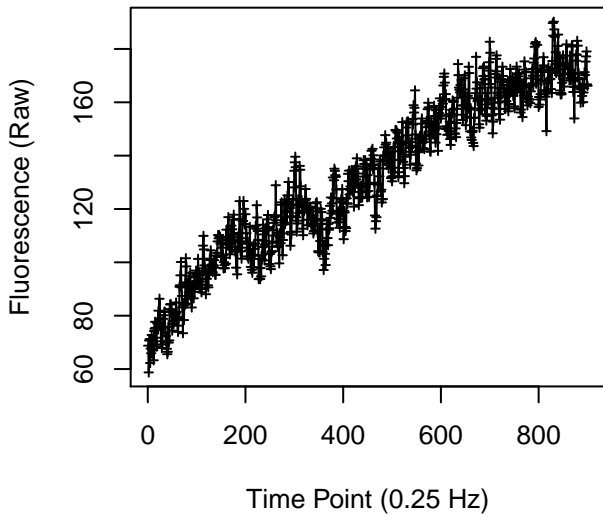

**Cell 1704**

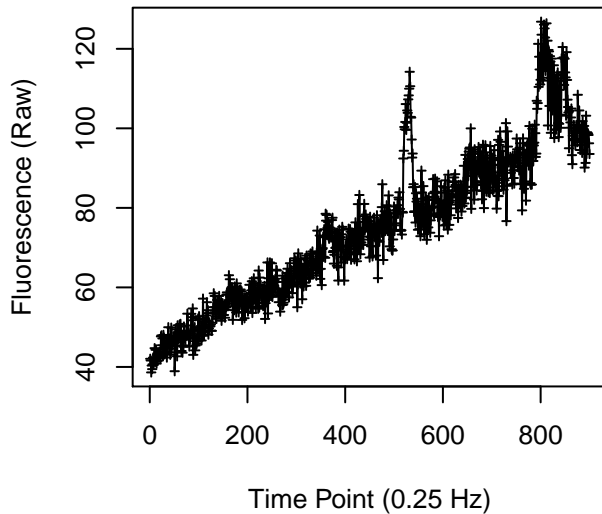



**Cell 1705**

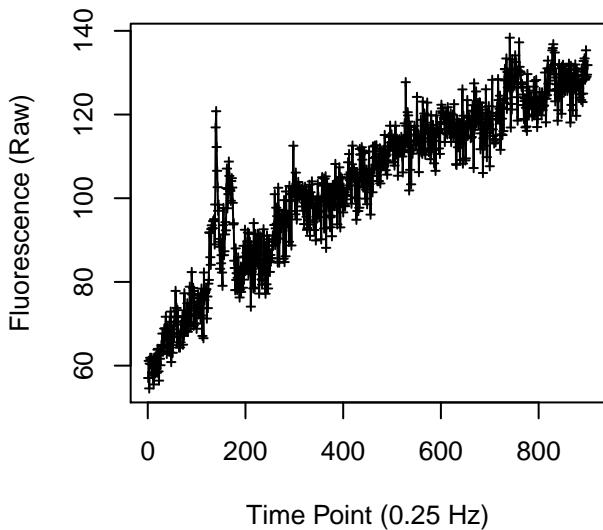

**Cell 1706**

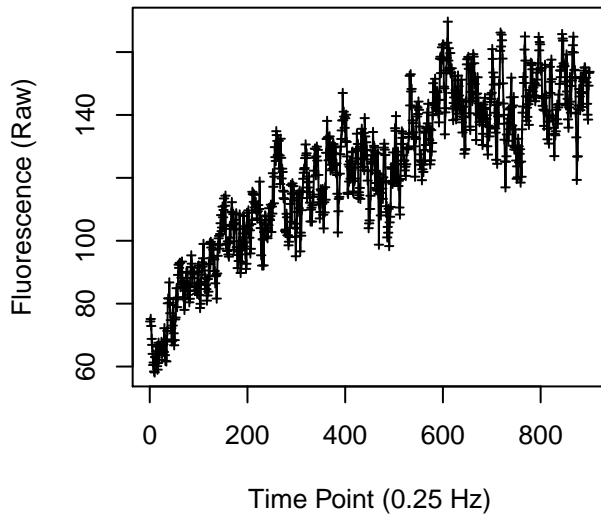

**Cell 1707**

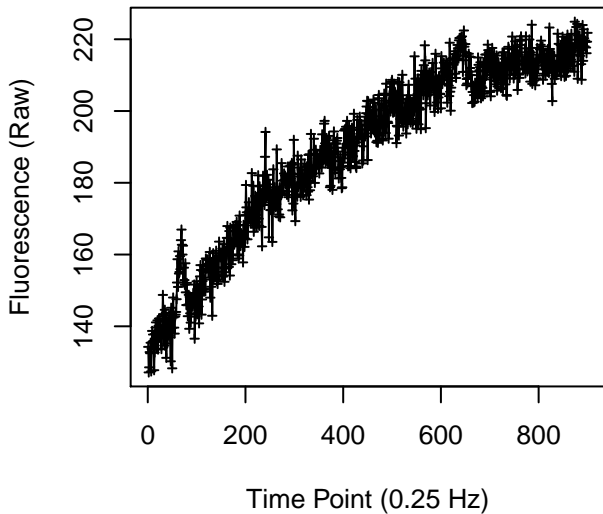

**Cell 1708**

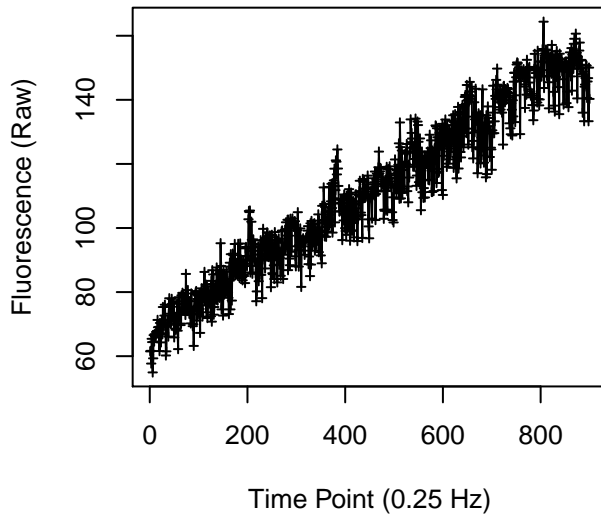

**Cell 1709**

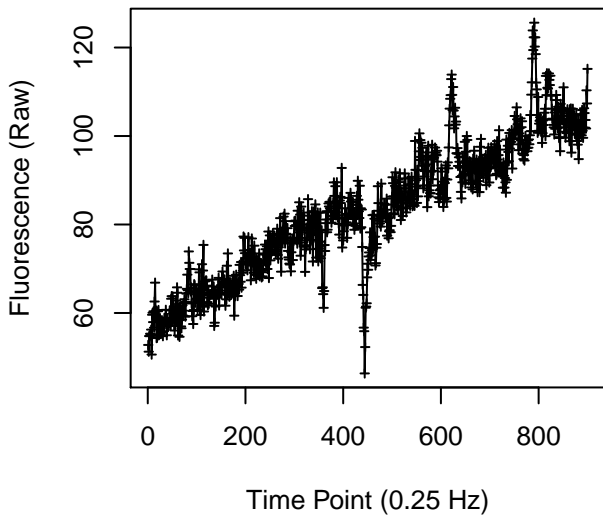

**Cell 1710**

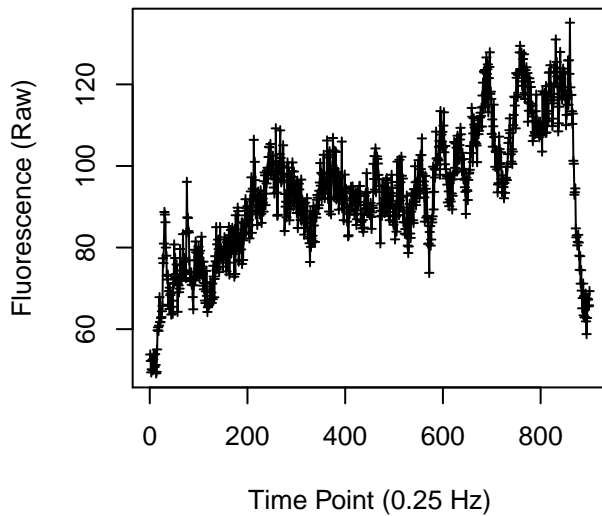

**Cell 1711**

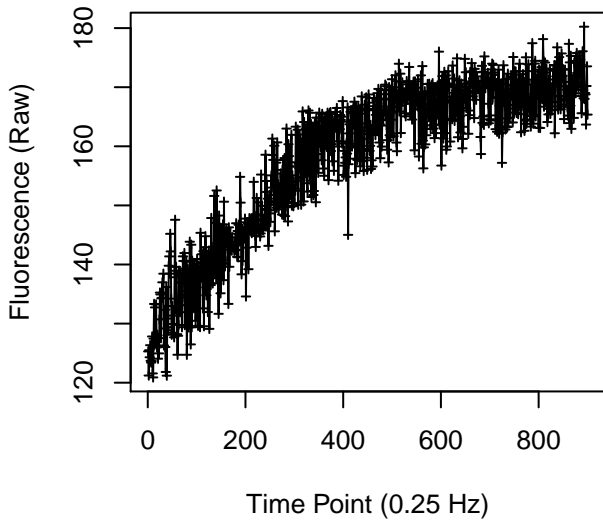

**Cell 1712**

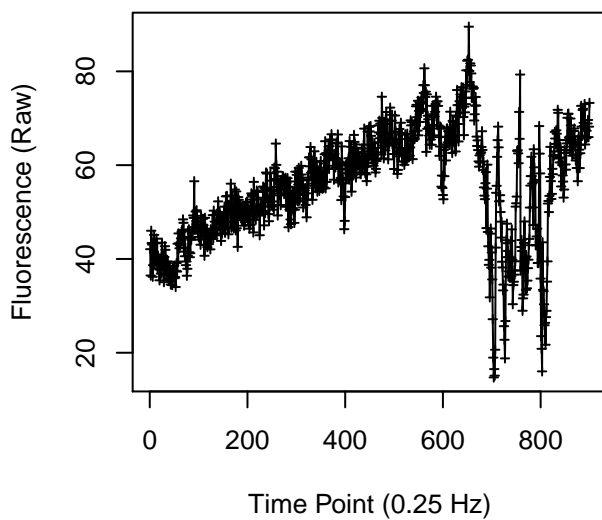

**Cell 1713**

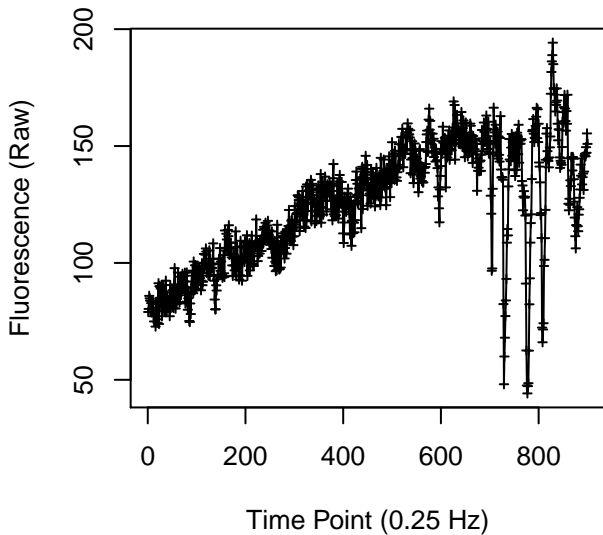

**Cell 1714**

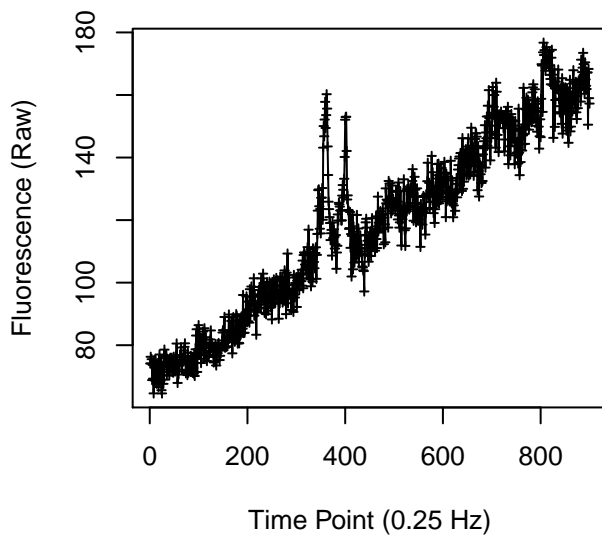

**Cell 1715**

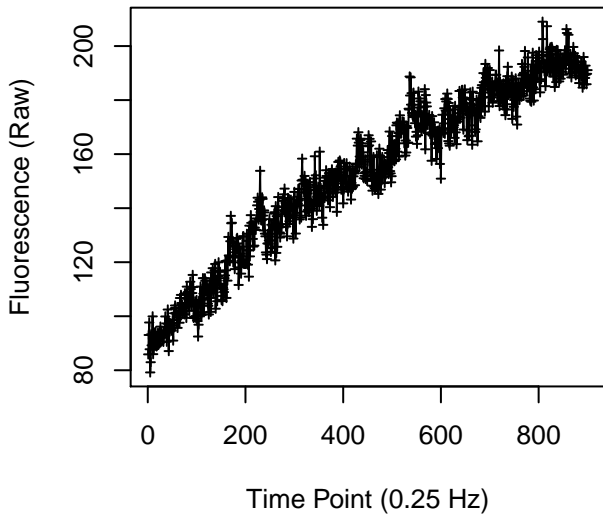

**Cell 1716**

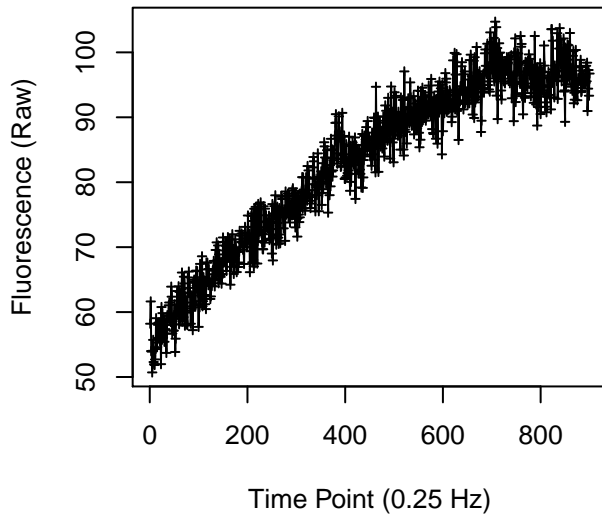

**Cell 1717**

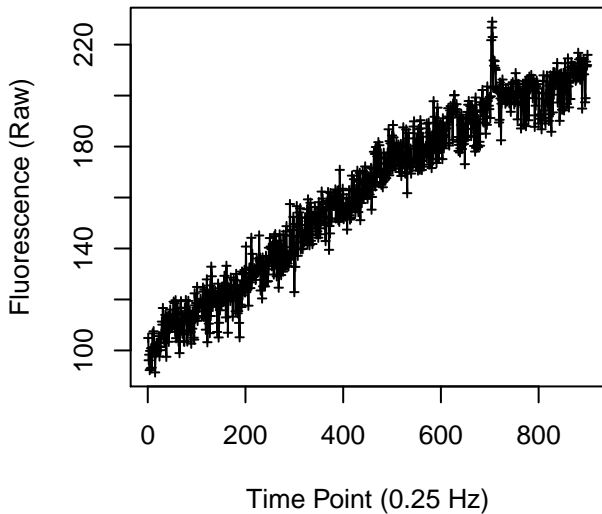

**Cell 1718**

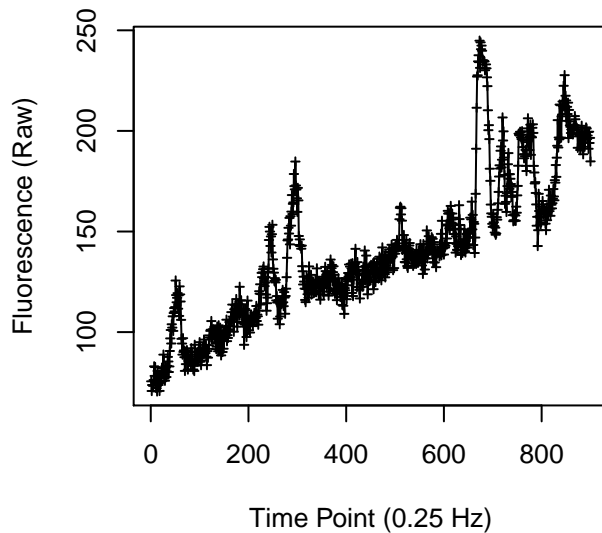

**Cell 1719**

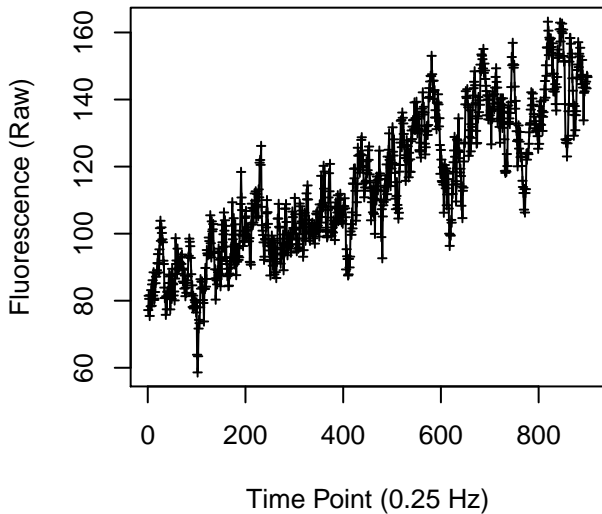

**Cell 1720**

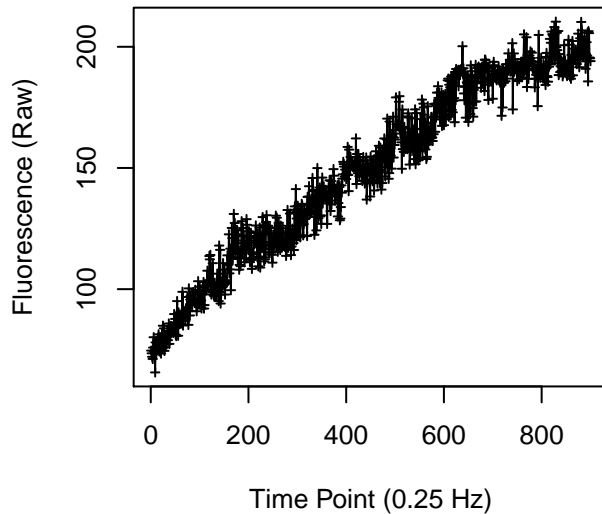

**Cell 1721**

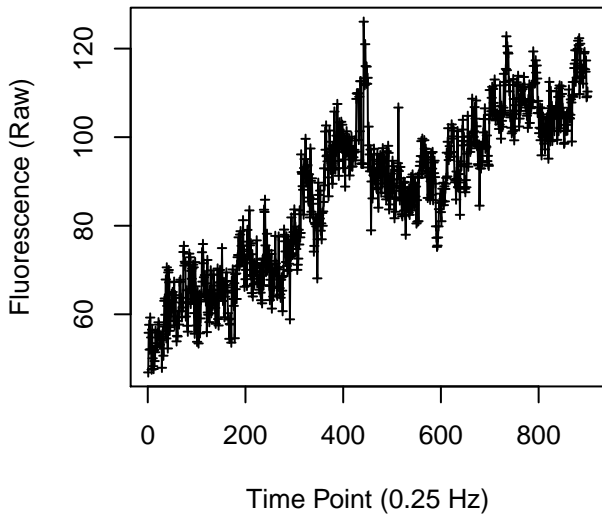

**Cell 1722**

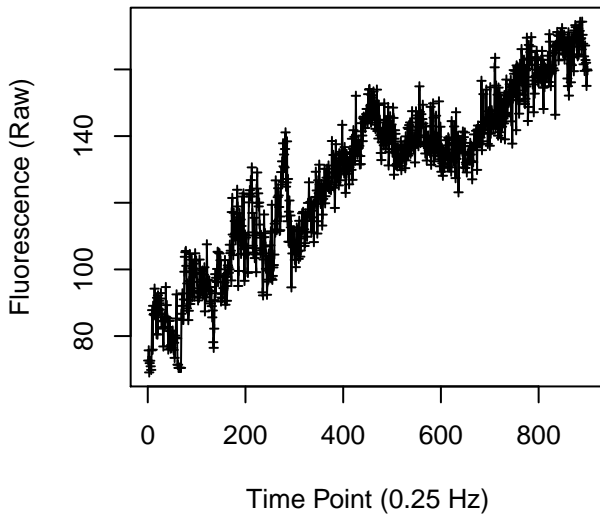

**Cell 1723**

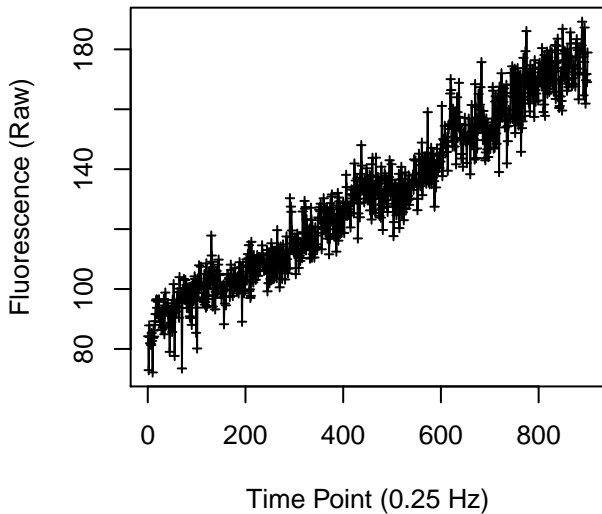

**Cell 1724**

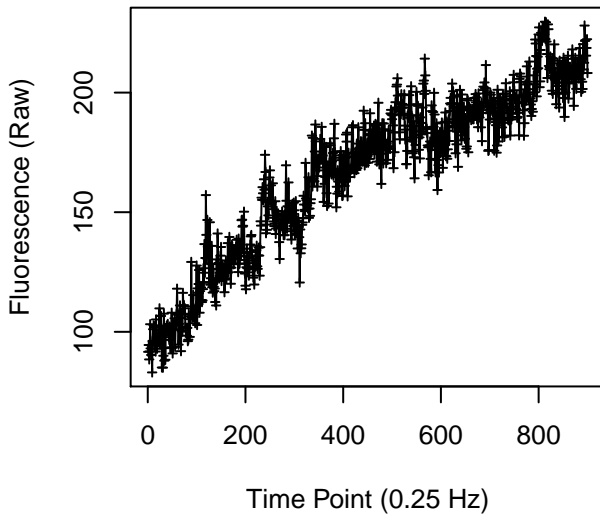

**Cell 1725**

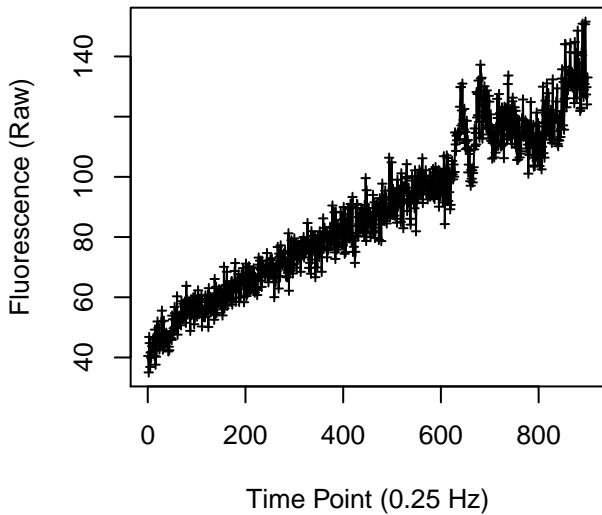

**Cell 1726**

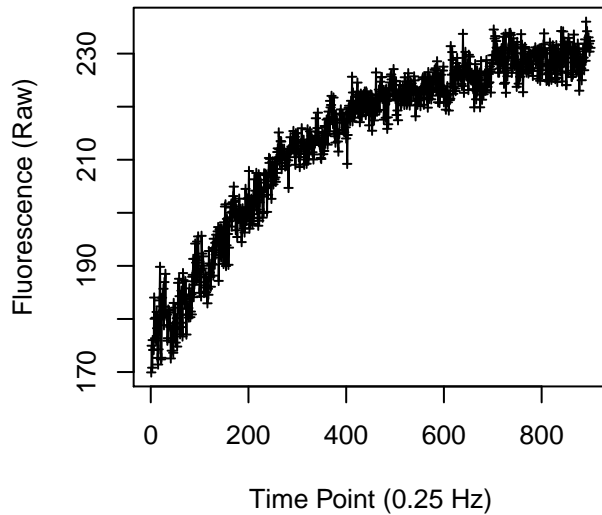

**Cell 1727**

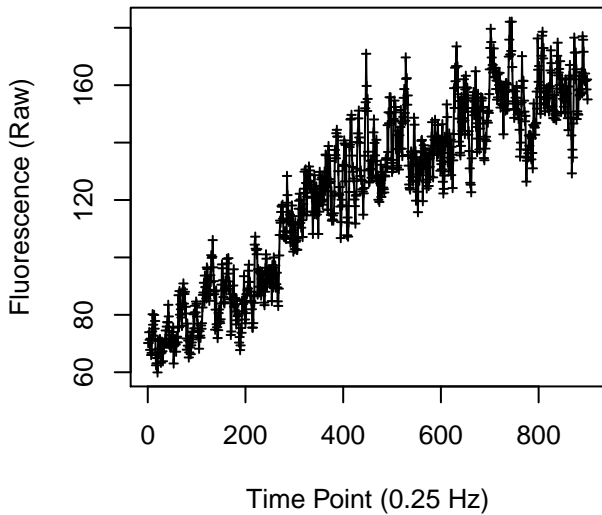

**Cell 1728**

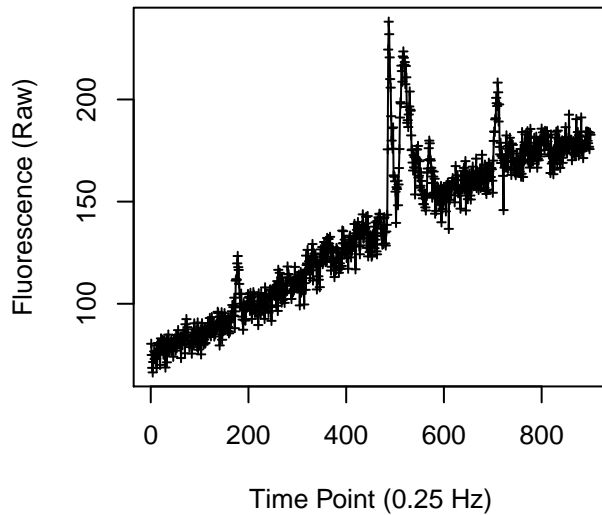

**Cell 1729**

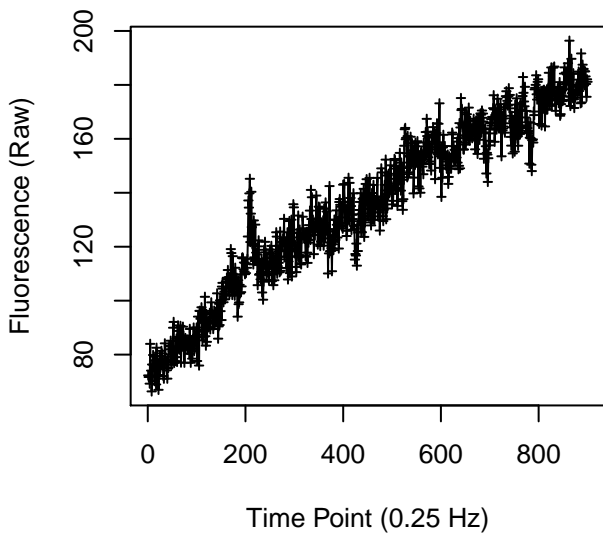

**Cell 1730**

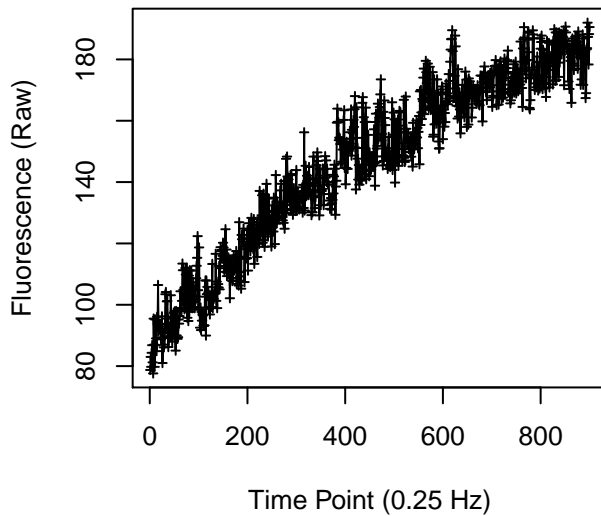

**Cell 1731**

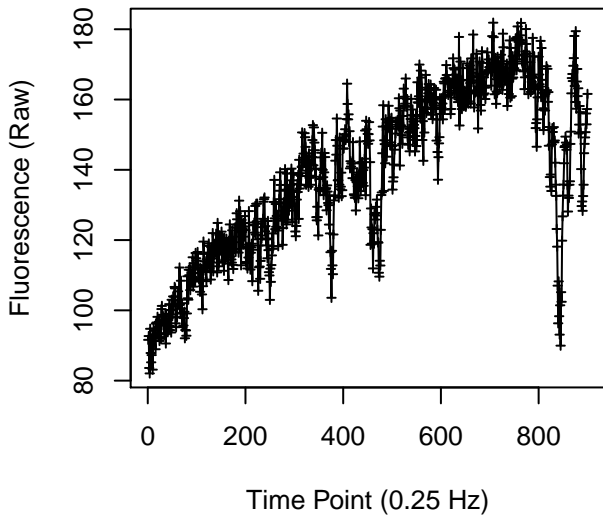

**Cell 1732**

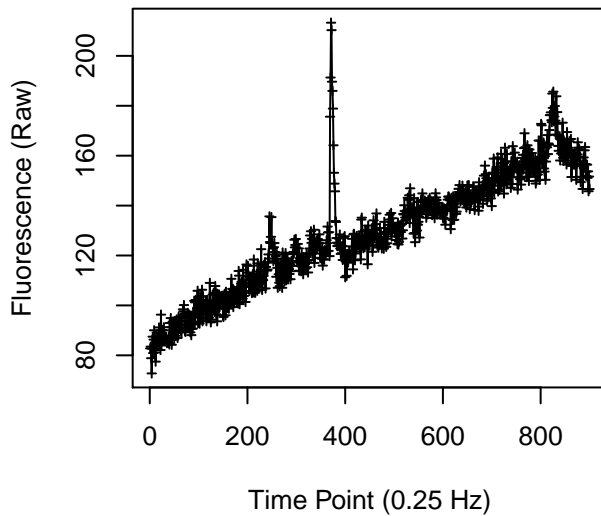

**Cell 1733**

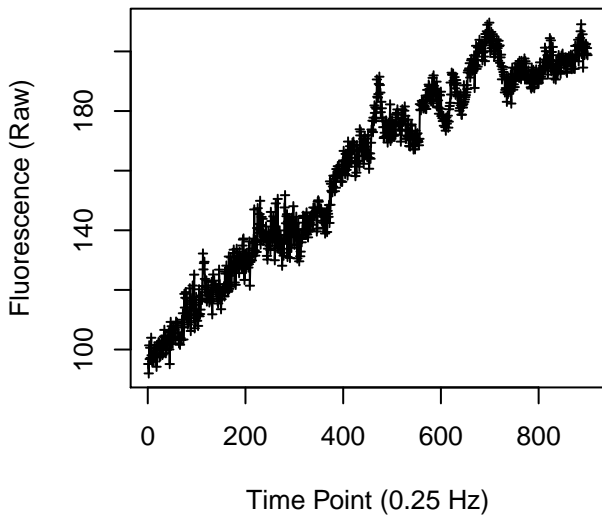

**Cell 1734**

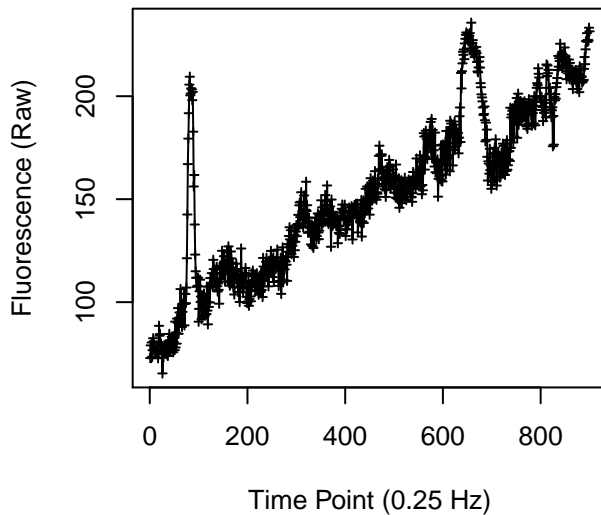

**Cell 1735**

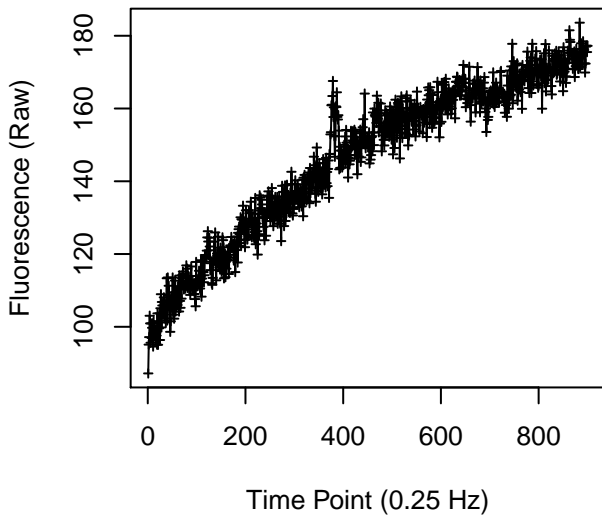

**Cell 1736**

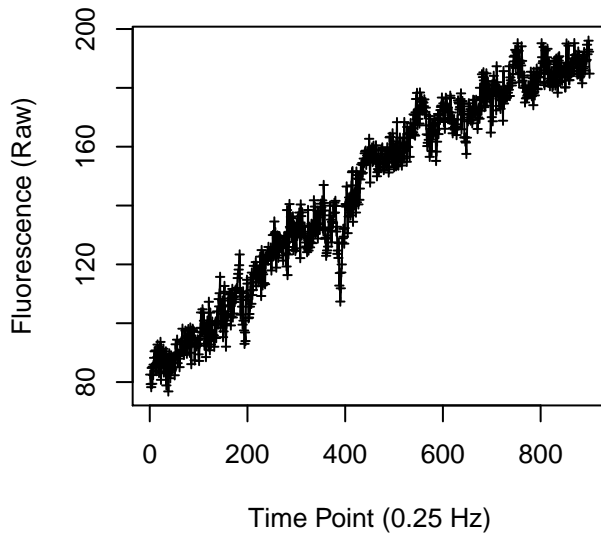



**Cell 1737**

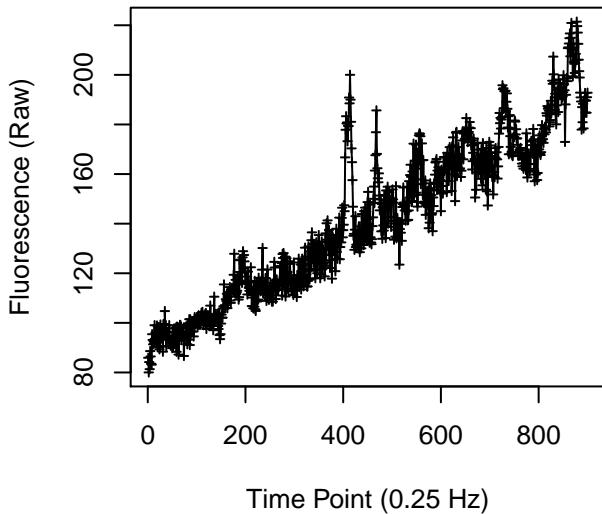

**Cell 1738**

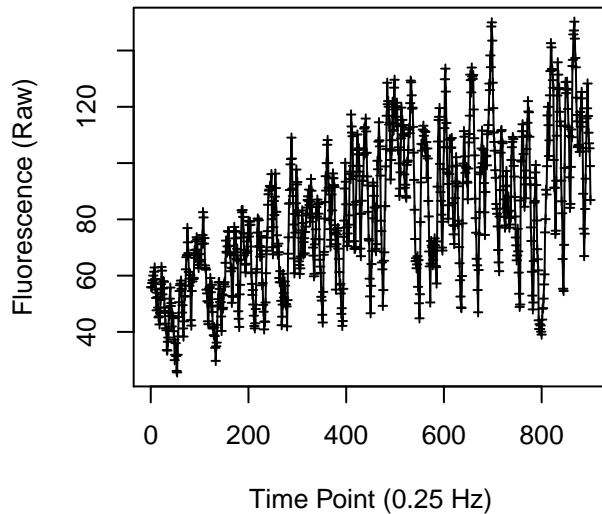

**Cell 1739**

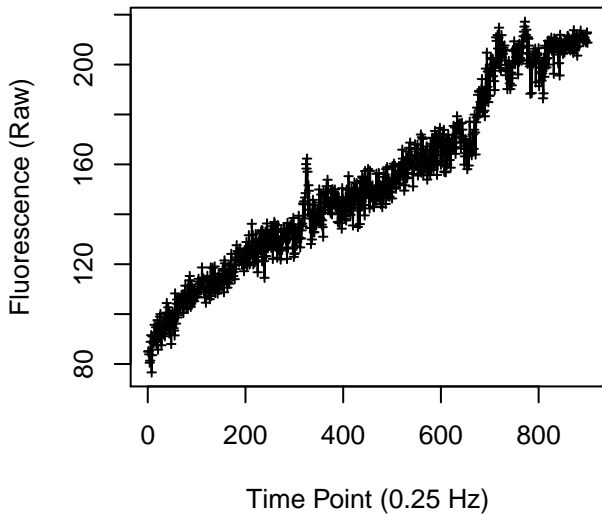

**Cell 1740**

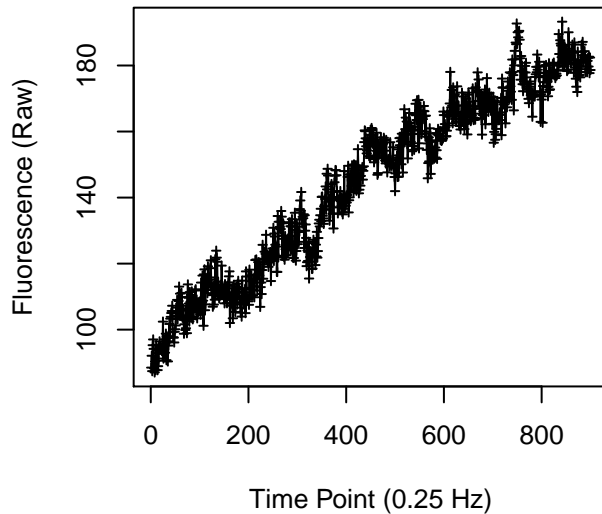

**Cell 1741**

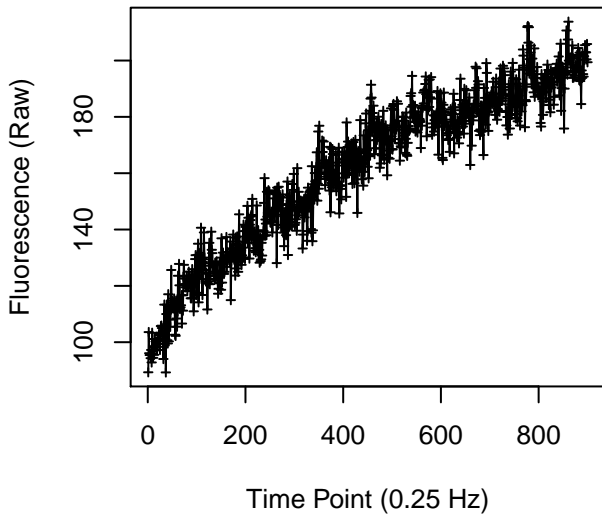

**Cell 1742**

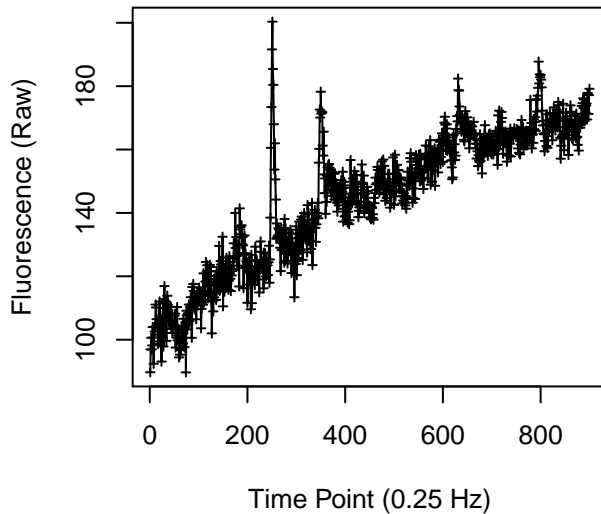

**Cell 1743**

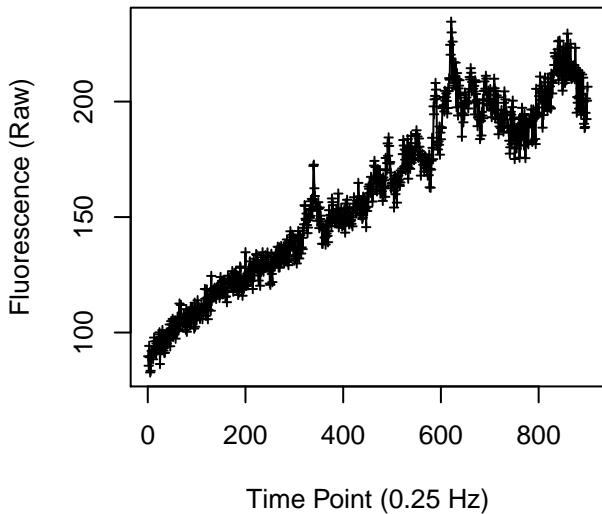

**Cell 1744**

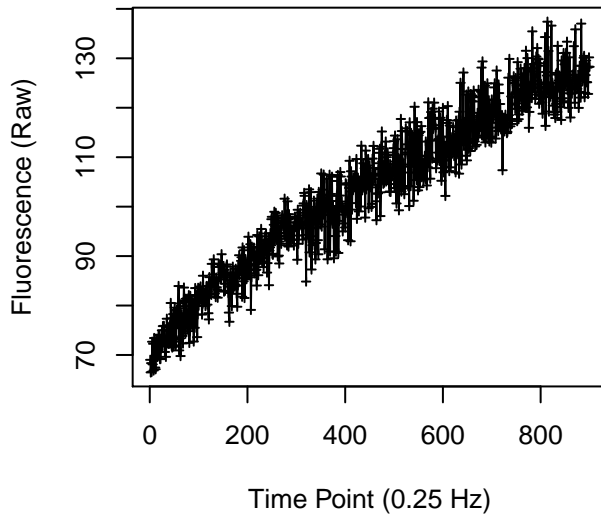

**Cell 1745**

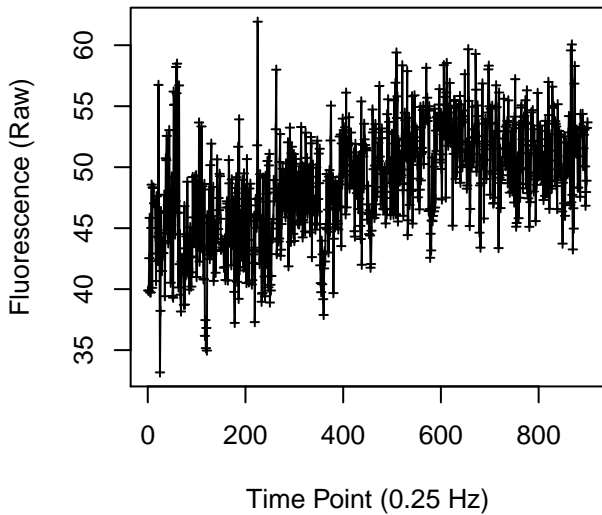

**Cell 1746**

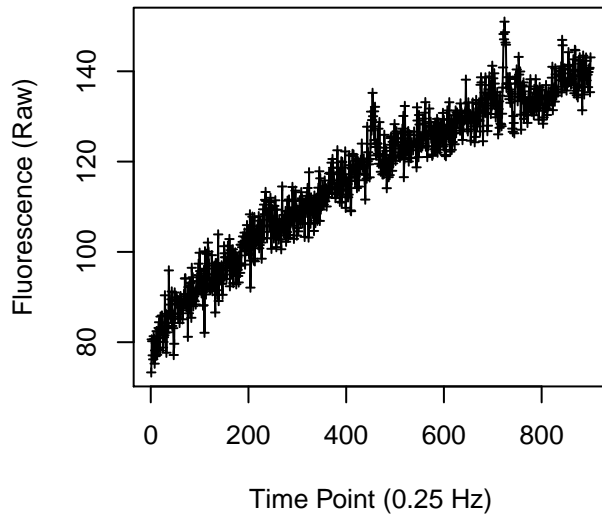

**Cell 1747**

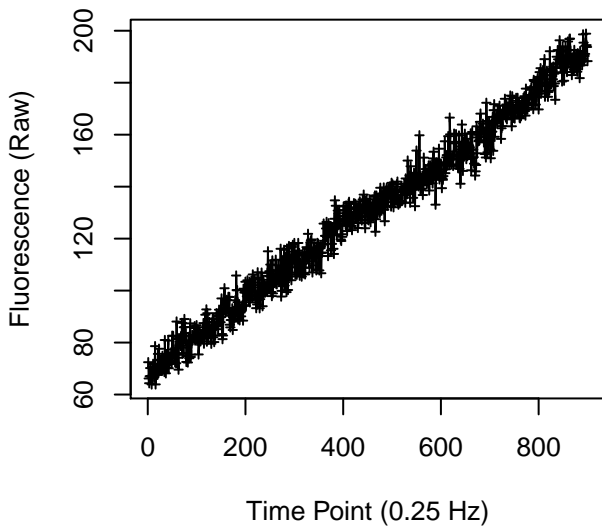

**Cell 1748**

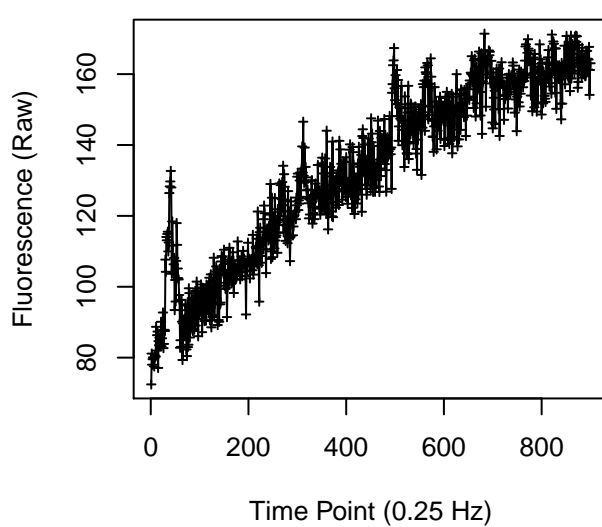

**Cell 1749**

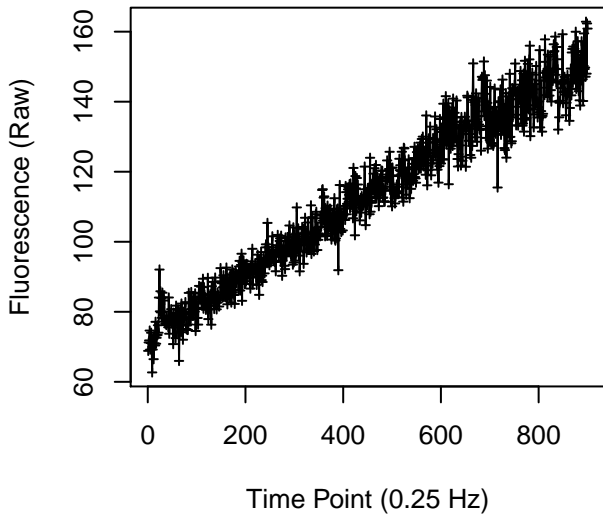

**Cell 1750**

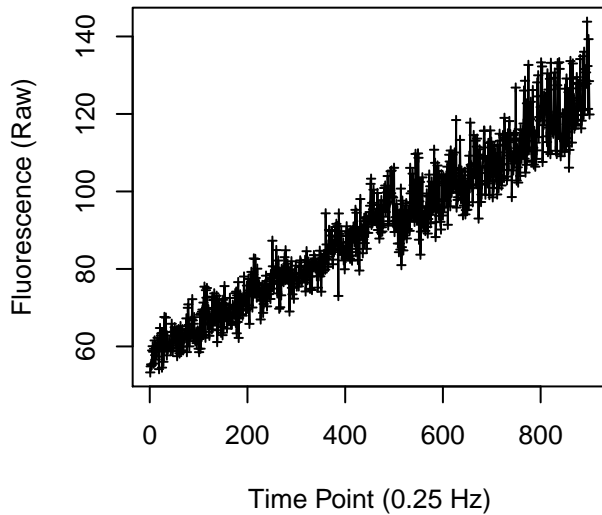

**Cell 1751**

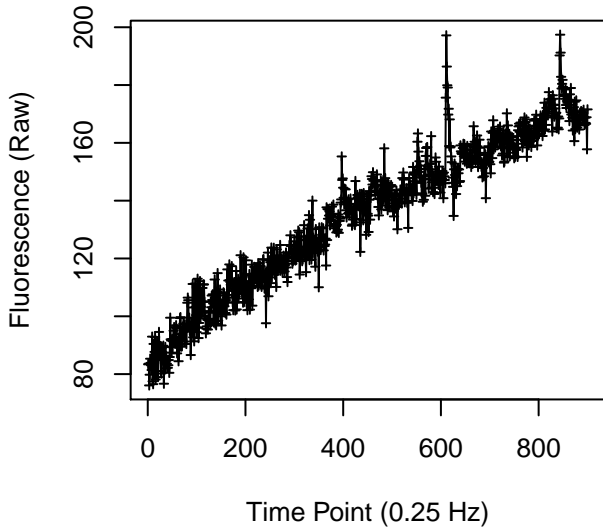

**Cell 1752**

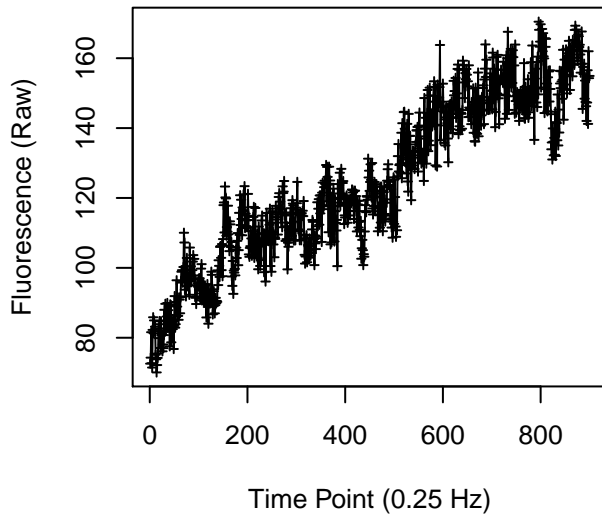

**Cell 1753**

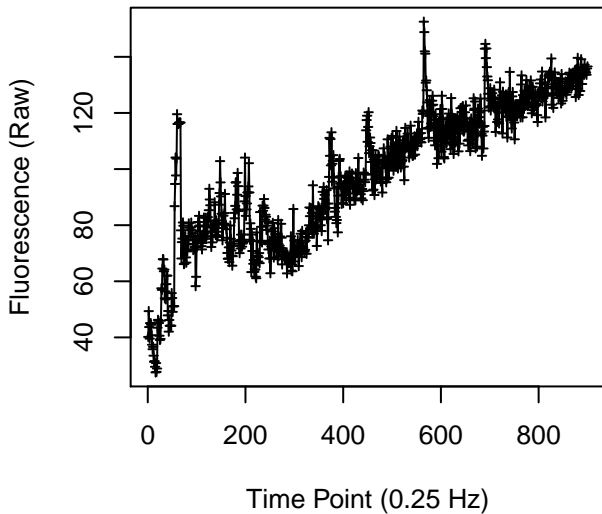

**Cell 1754**

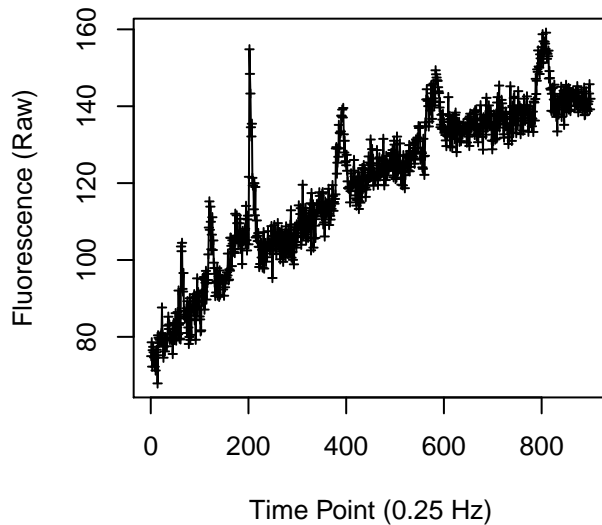

**Cell 1755**

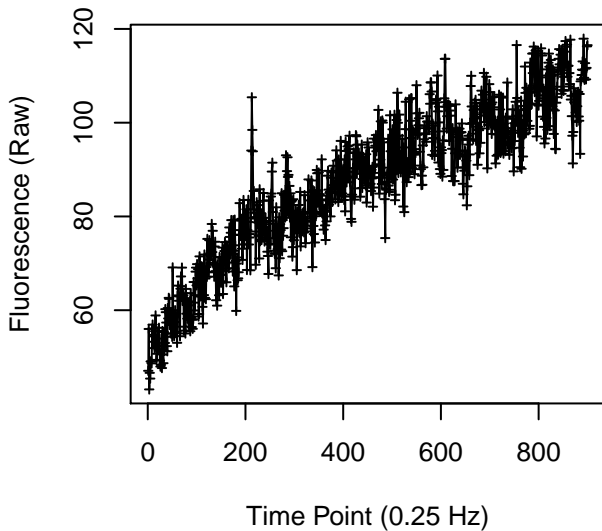

**Cell 1756**

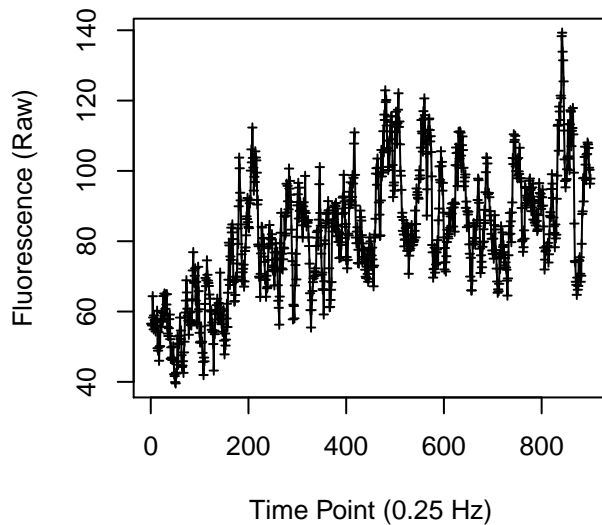

**Cell 1757**

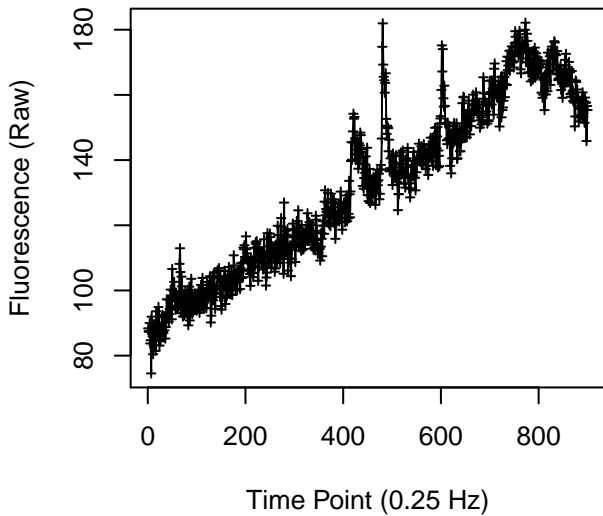

**Cell 1758**

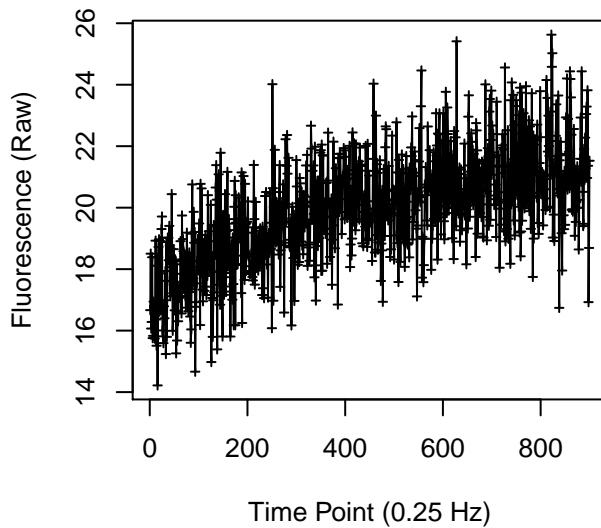

**Cell 1759**

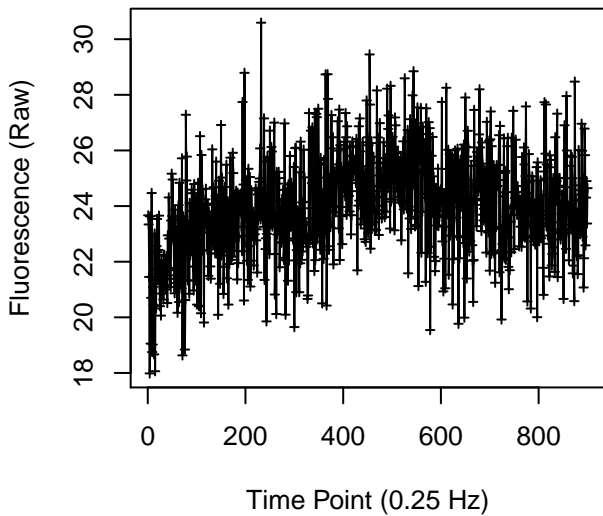

**Cell 1760**

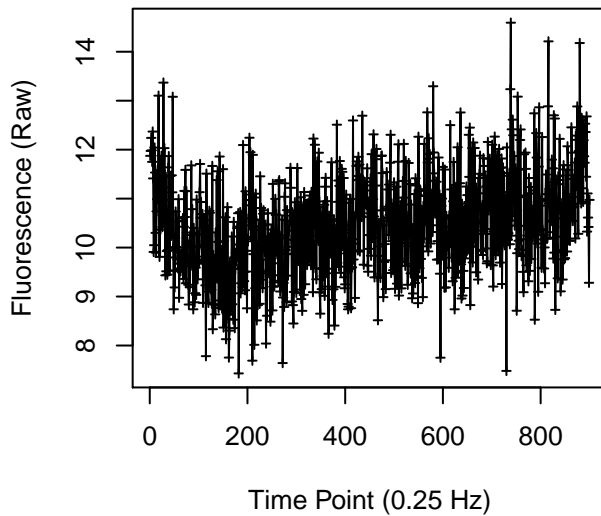

**Cell 1761**

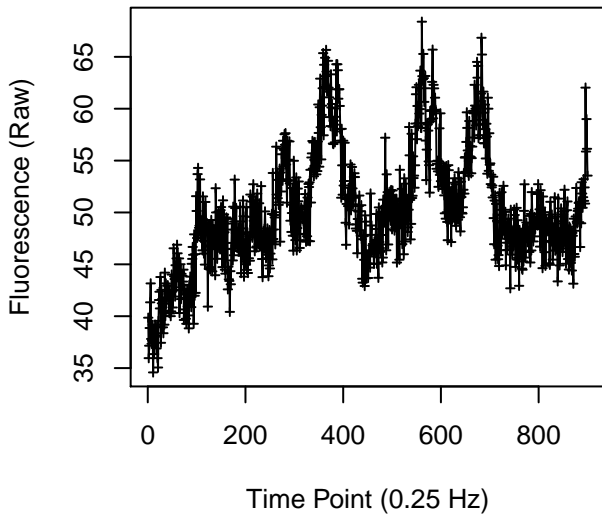

**Cell 1762**

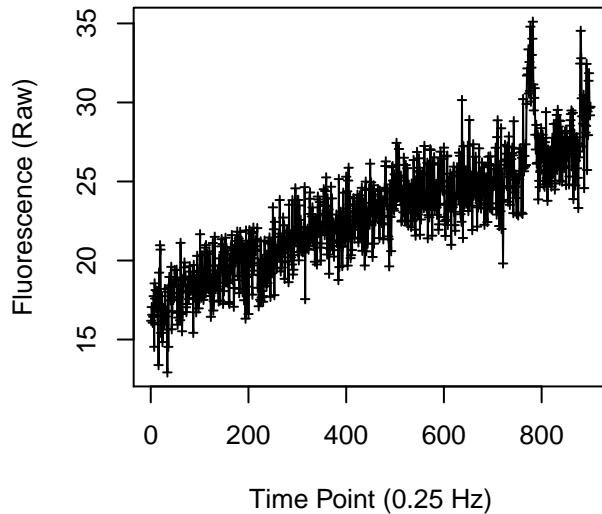

**Cell 1763**

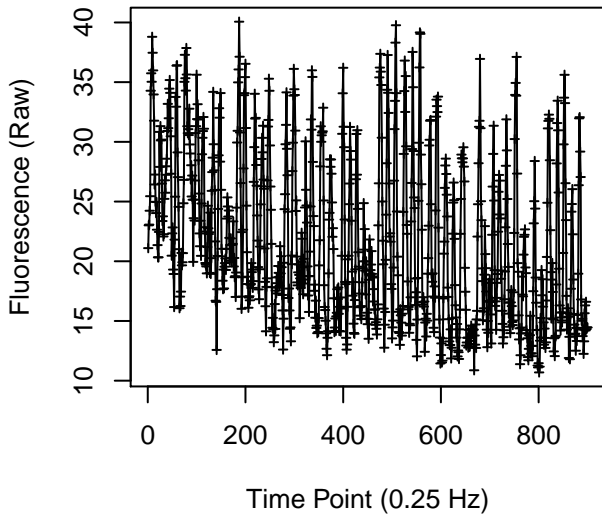

**Cell 1764**

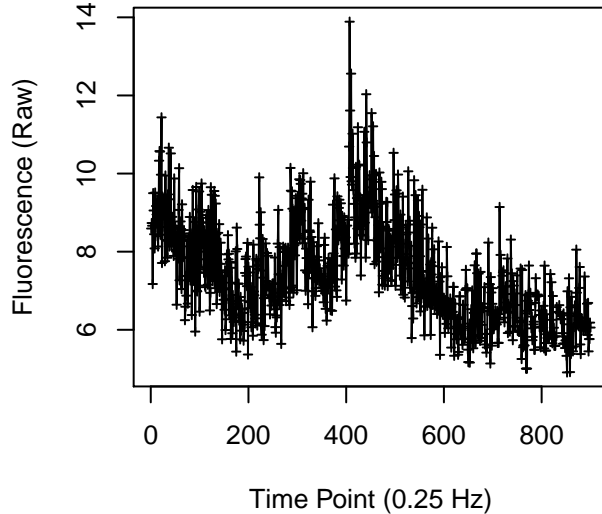

**Cell 1765**

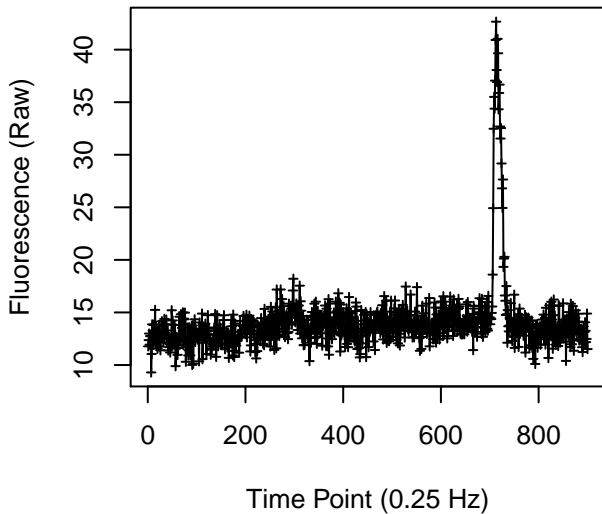

**Cell 1766**

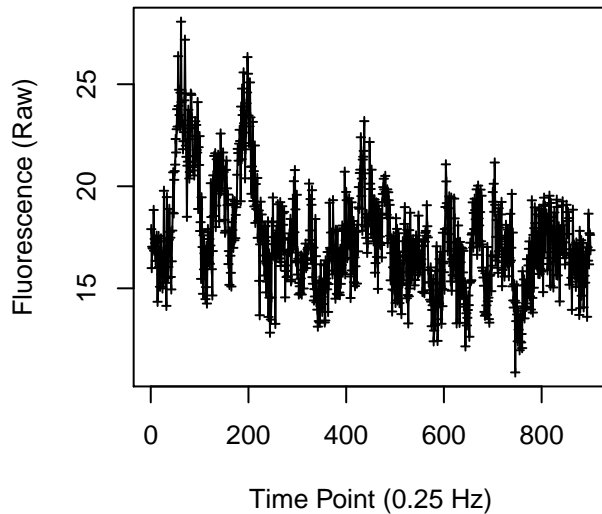

**Cell 1767**

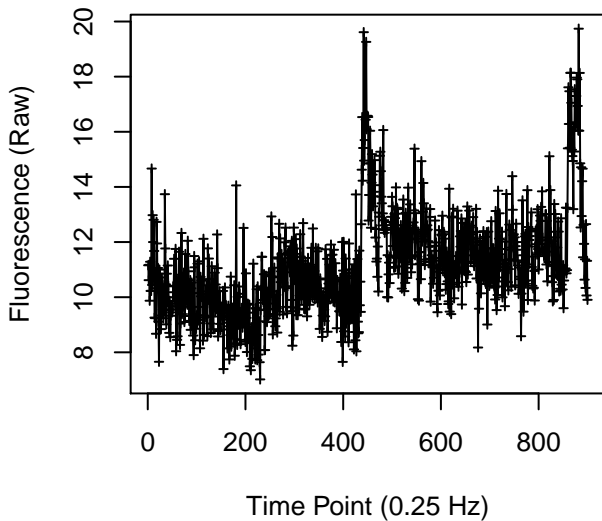

**Cell 1768**

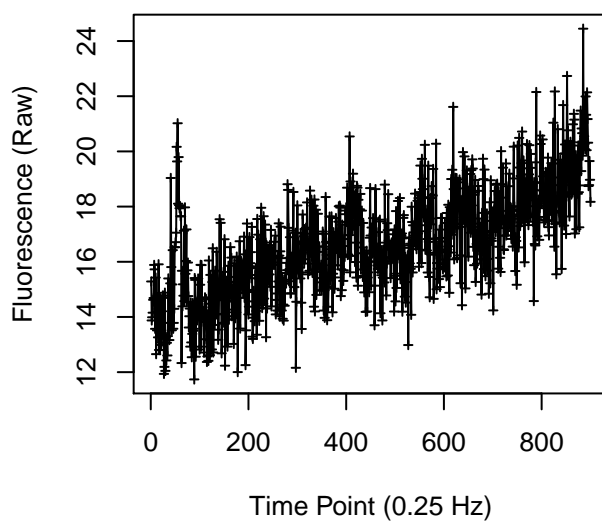



**Cell 1769**

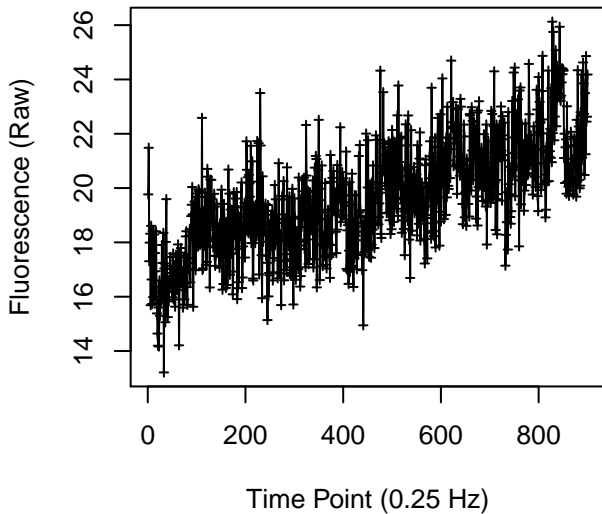

**Cell 1770**

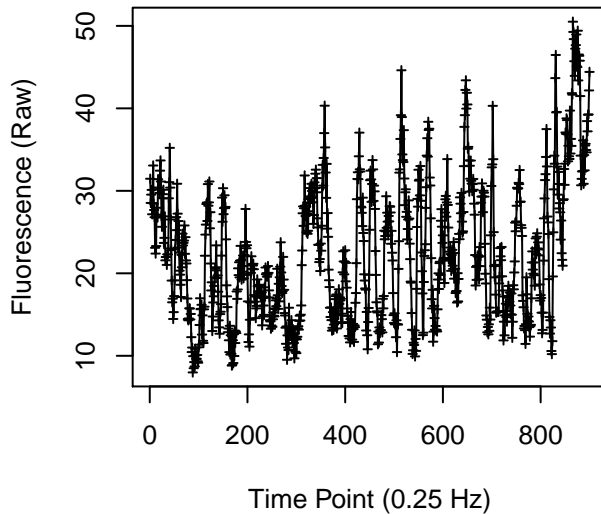

**Cell 1771**

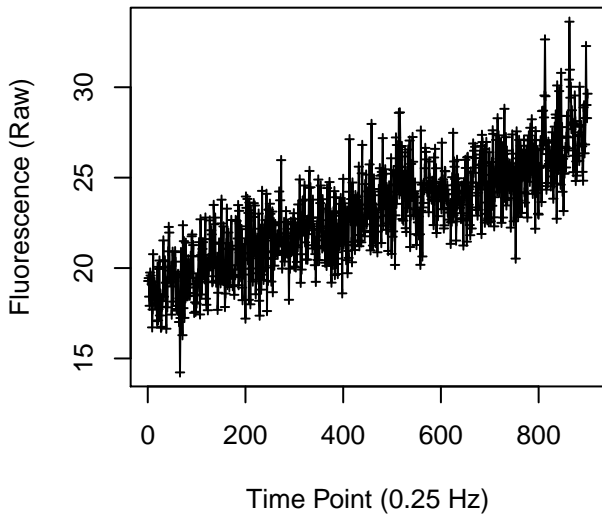

**Cell 1772**

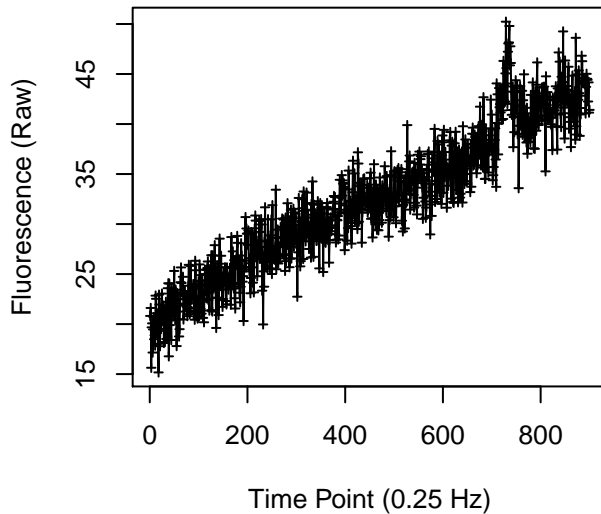

**Cell 1773**

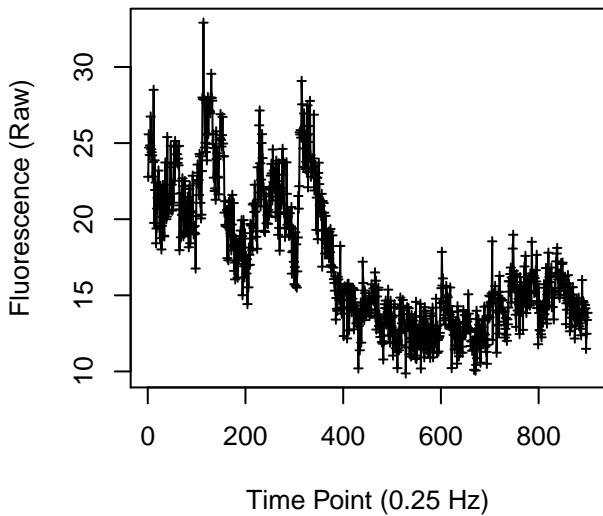

**Cell 1774**

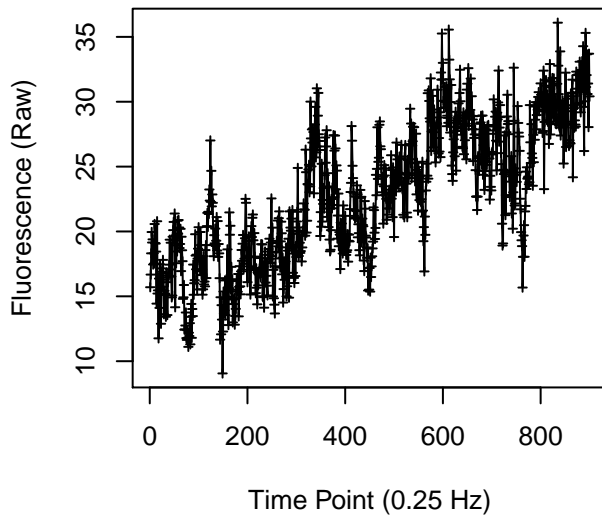

**Cell 1775**

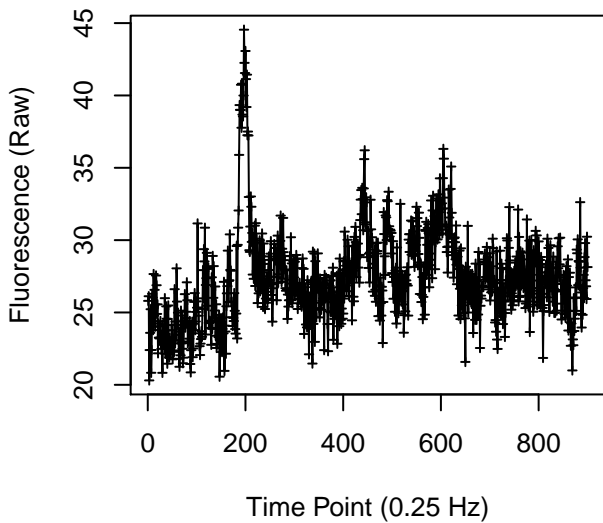

**Cell 1776**

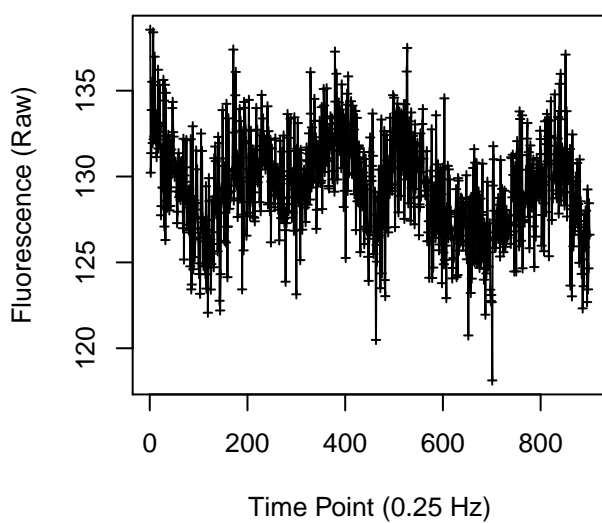

**Cell 1777**

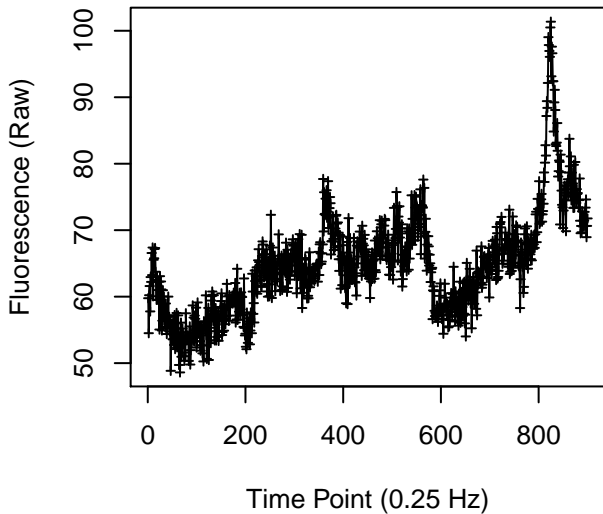

**Cell 1778**

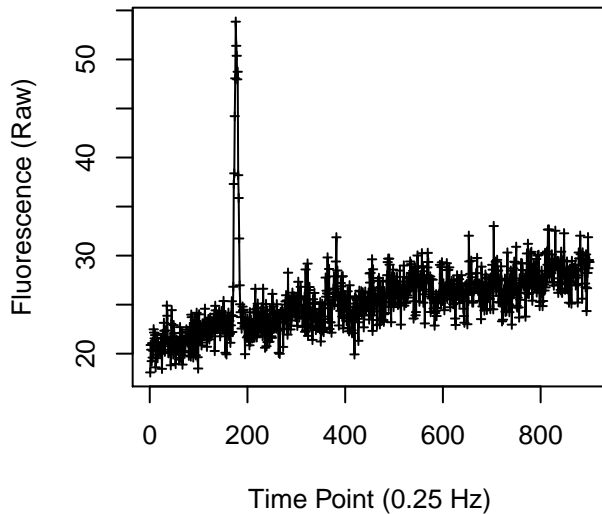

**Cell 1779**

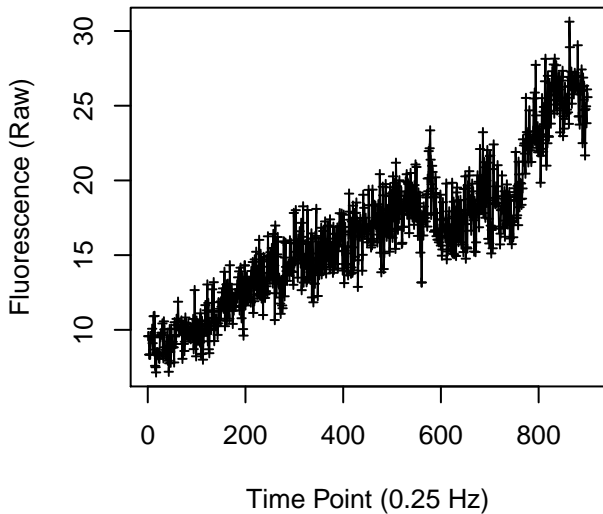

**Cell 1780**

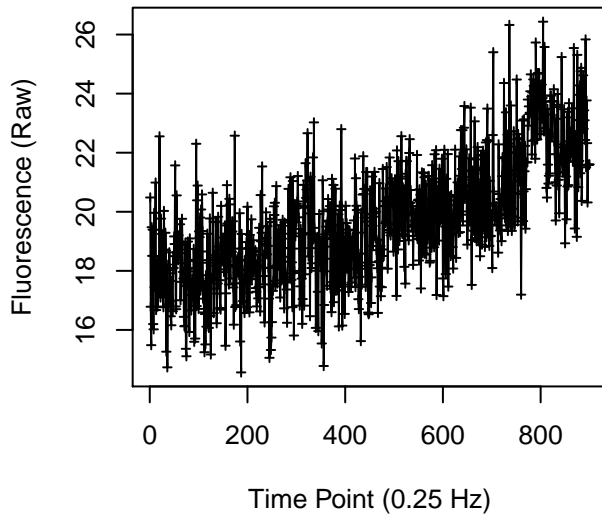

**Cell 1781**

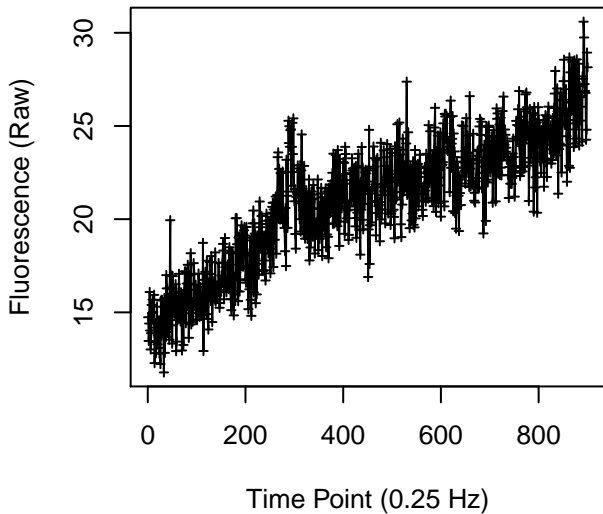

**Cell 1782**

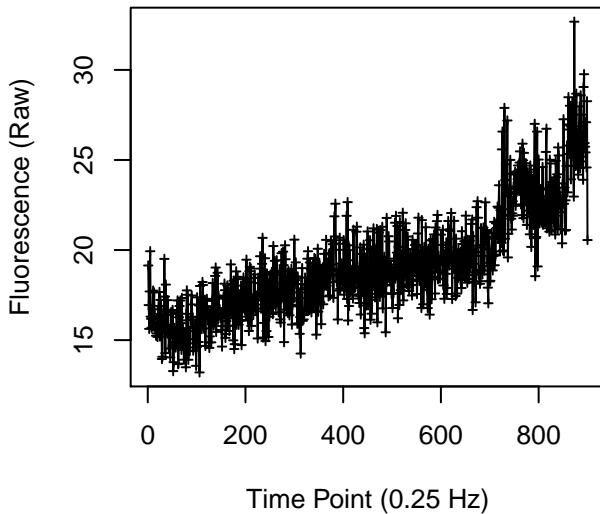

**Cell 1783**

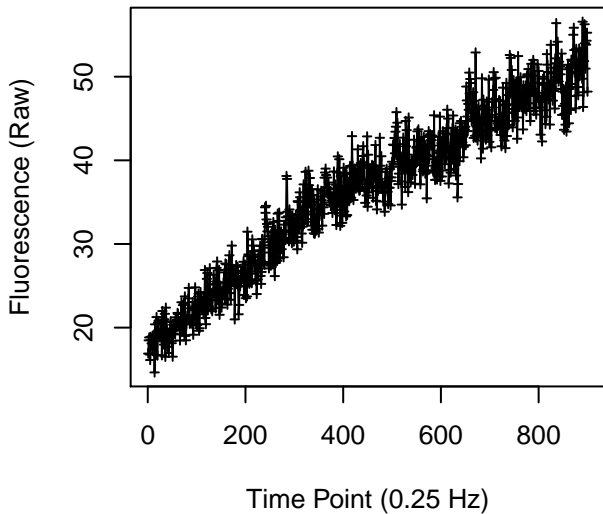

**Cell 1784**

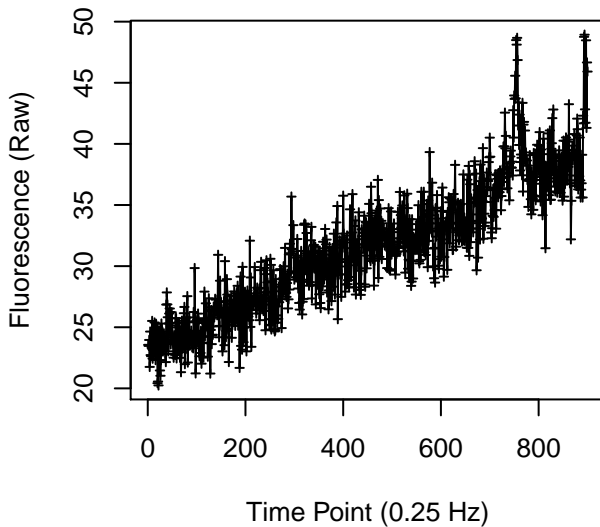

**Cell 1785**

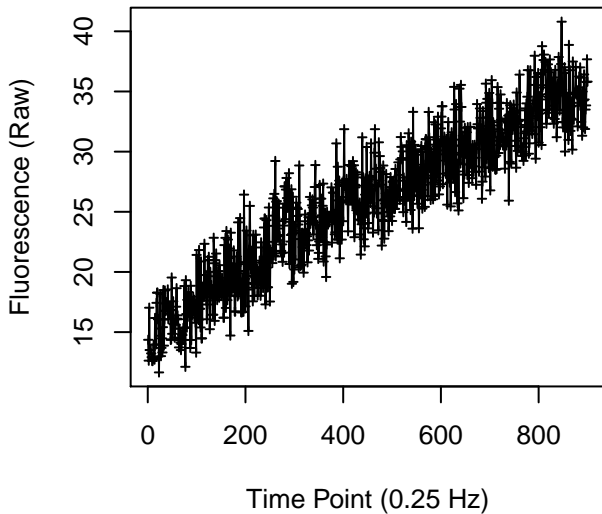

**Cell 1786**

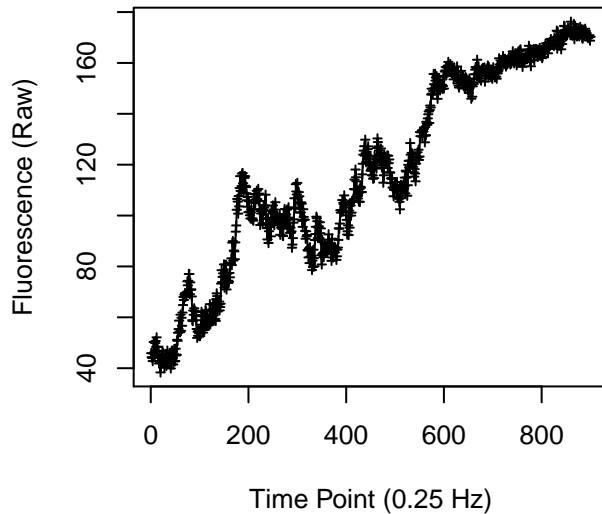

**Cell 1787**

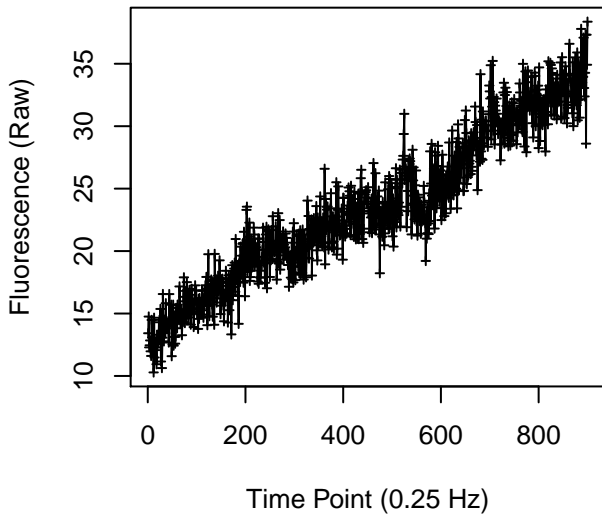

**Cell 1788**

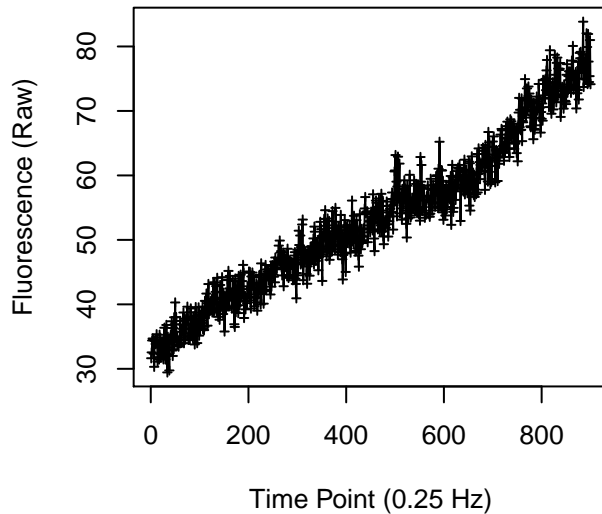

**Cell 1789**

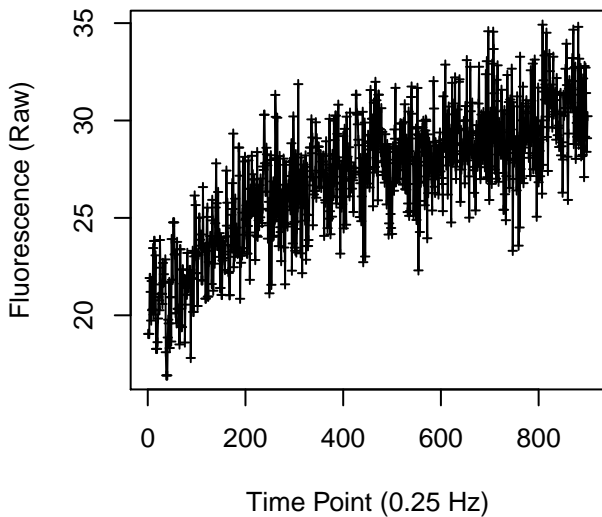

**Cell 1790**

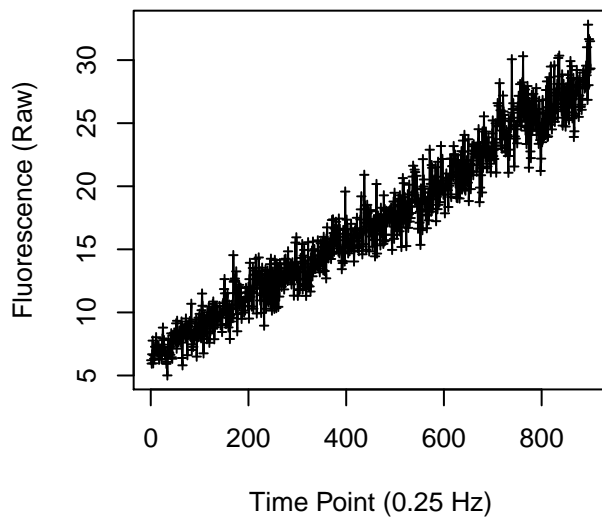

**Cell 1791**

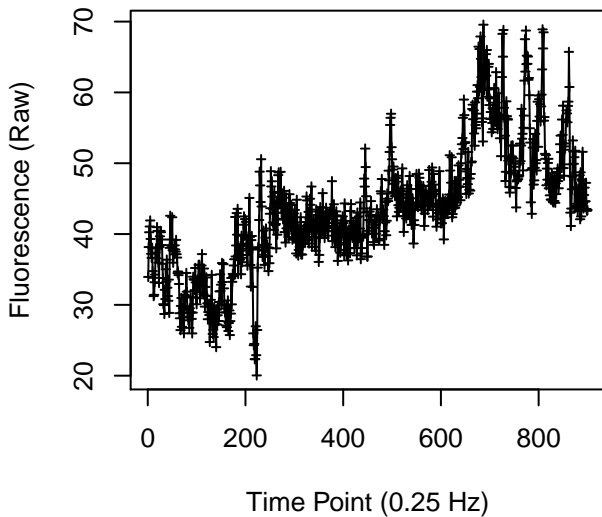

**Cell 1792**

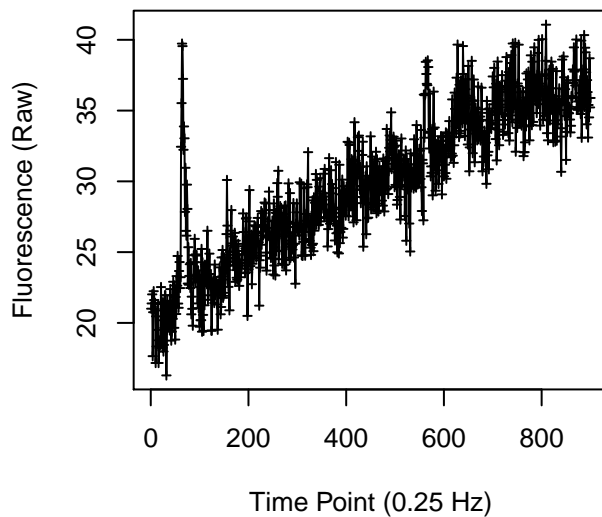

**Cell 1793**

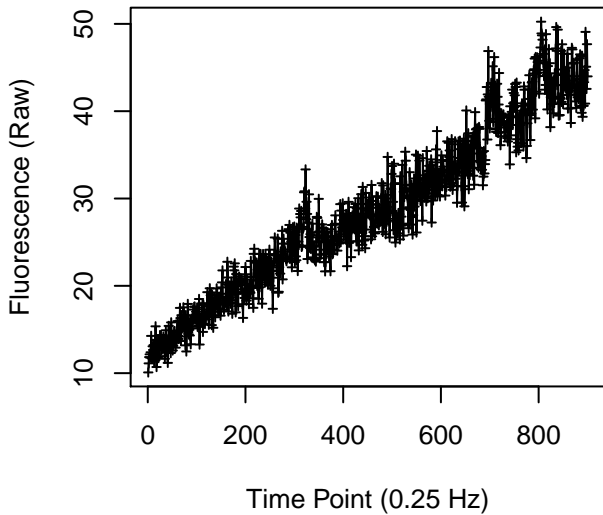

**Cell 1794**

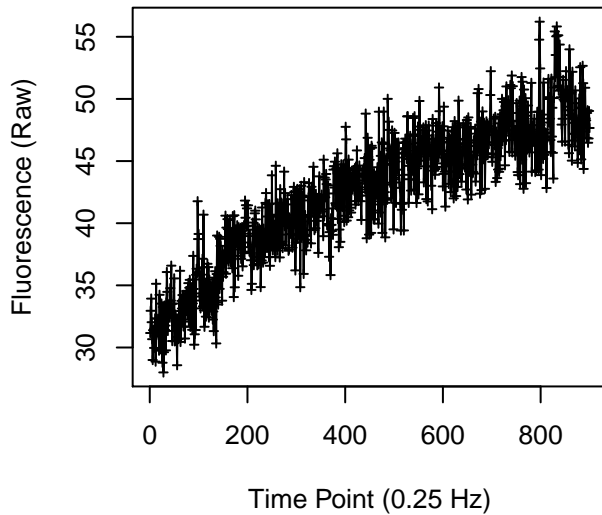

**Cell 1795**

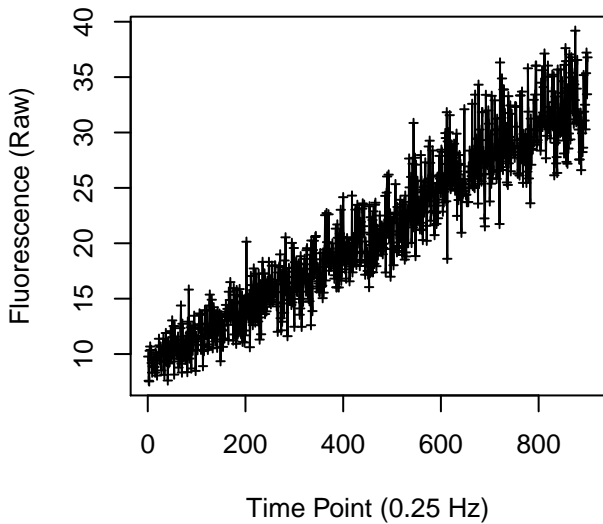

**Cell 1796**

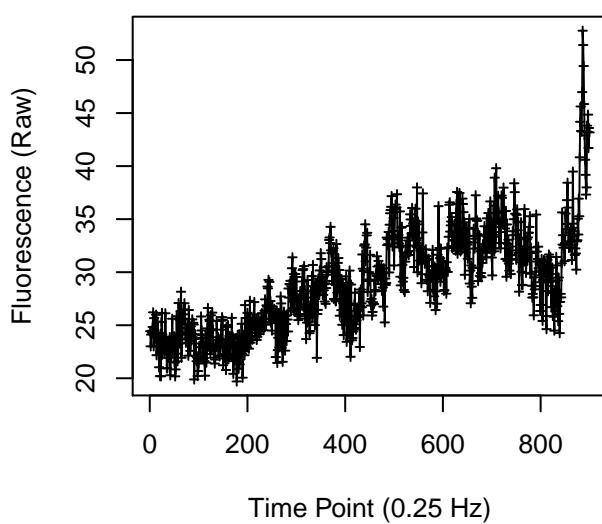

**Cell 1797**

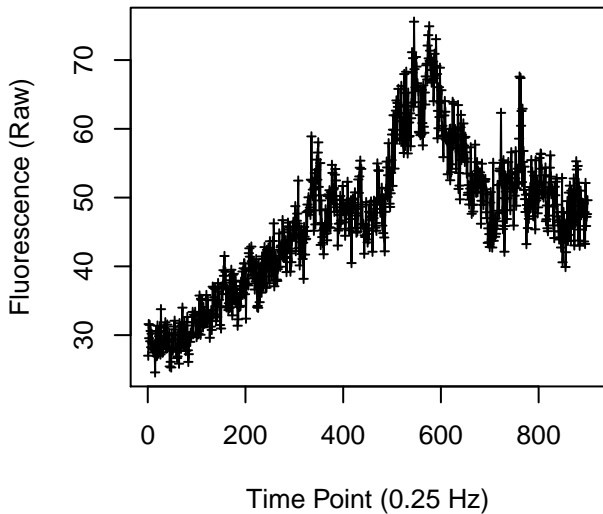

**Cell 1798**

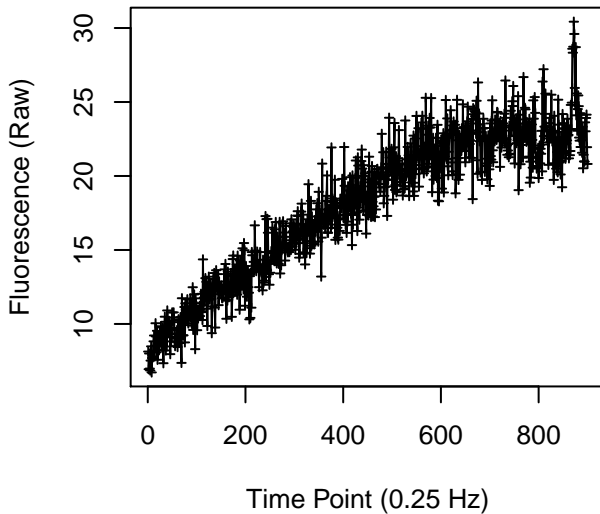

**Cell 1799**

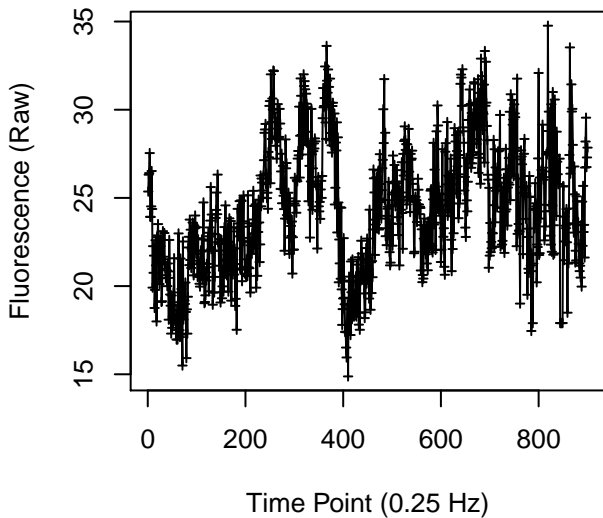

**Cell 1800**

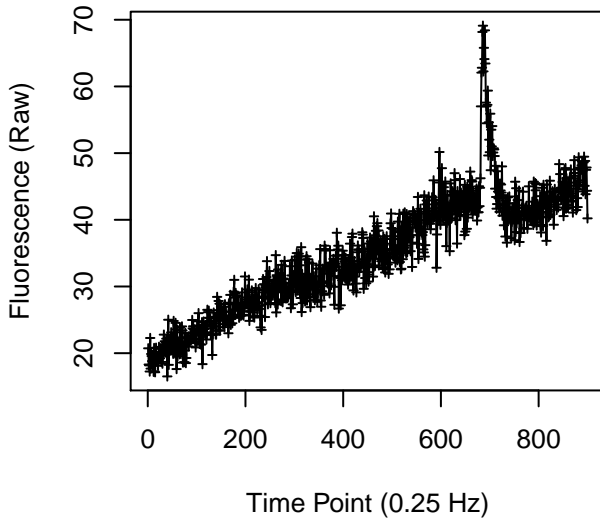



**Cell 1801**

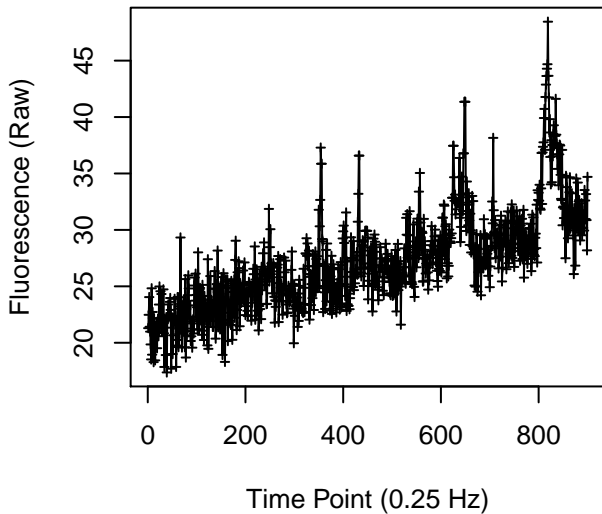

**Cell 1802**

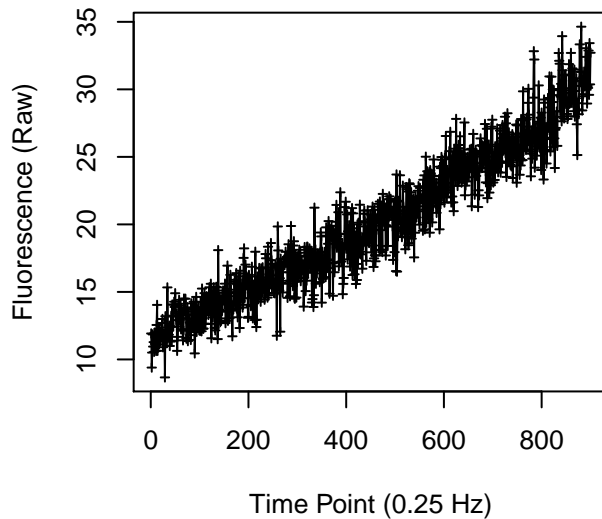

**Cell 1803**

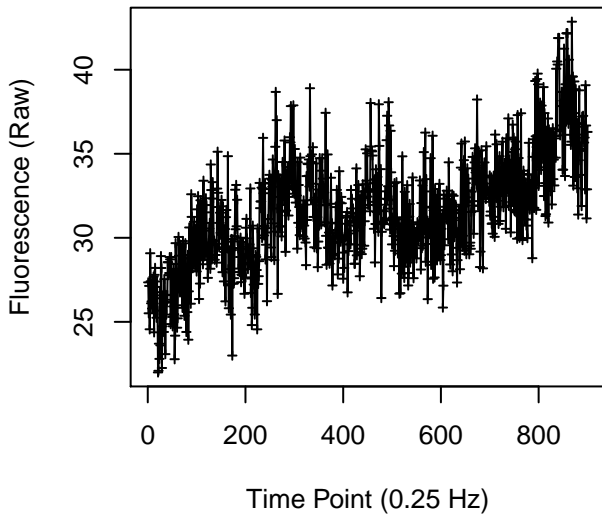

**Cell 1804**

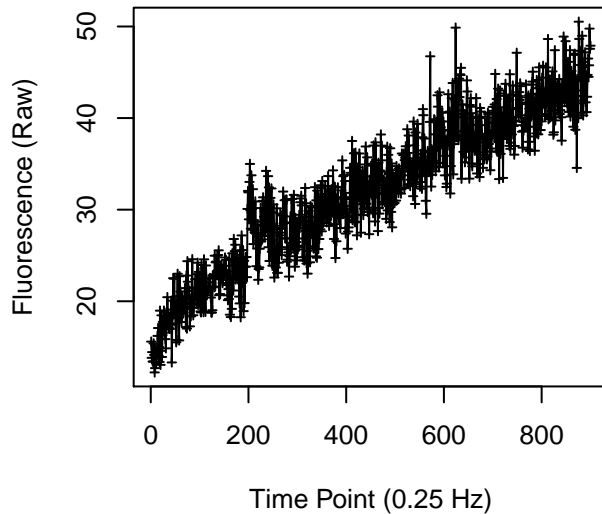

**Cell 1805**

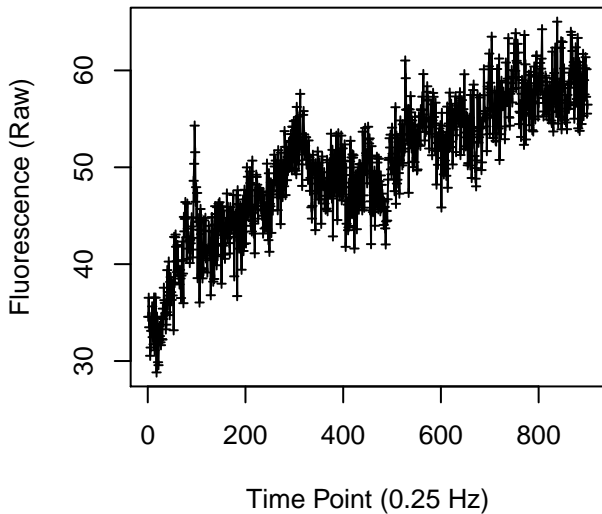

**Cell 1806**

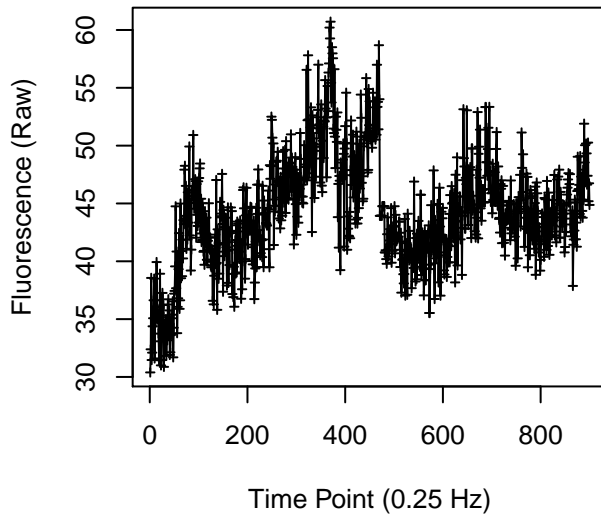

**Cell 1807**

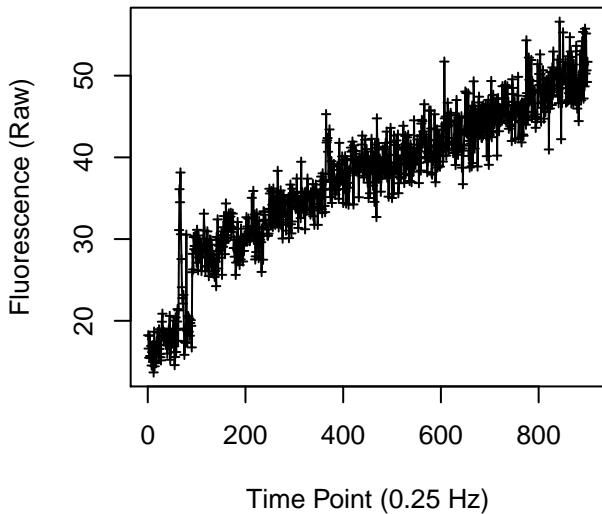

**Cell 1808**

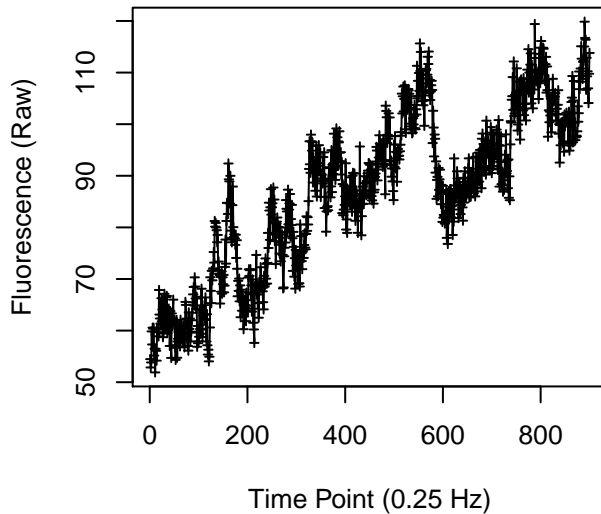

**Cell 1809**

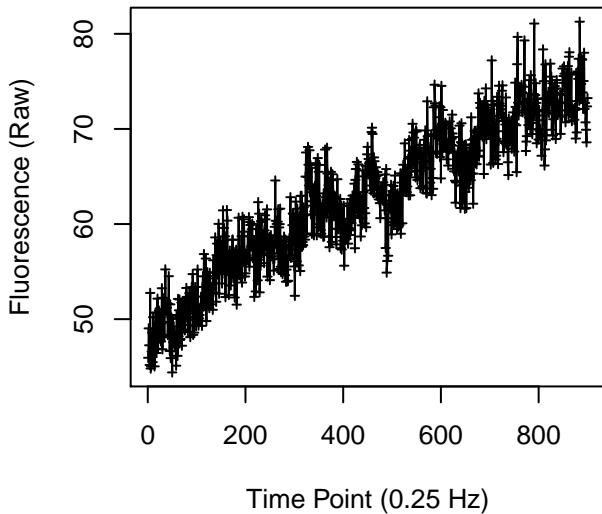

**Cell 1810**

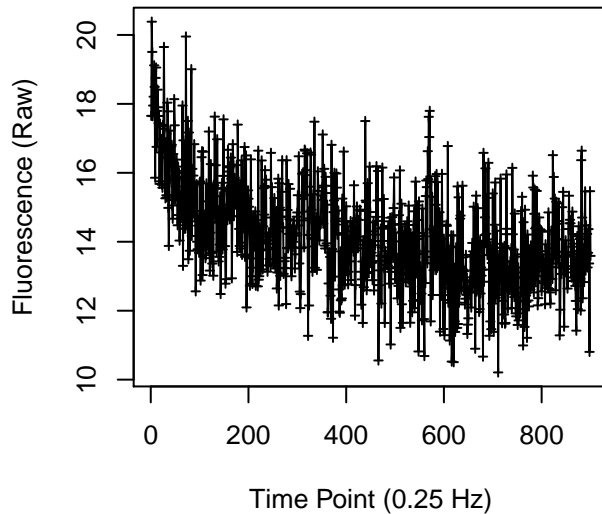

**Cell 1811**

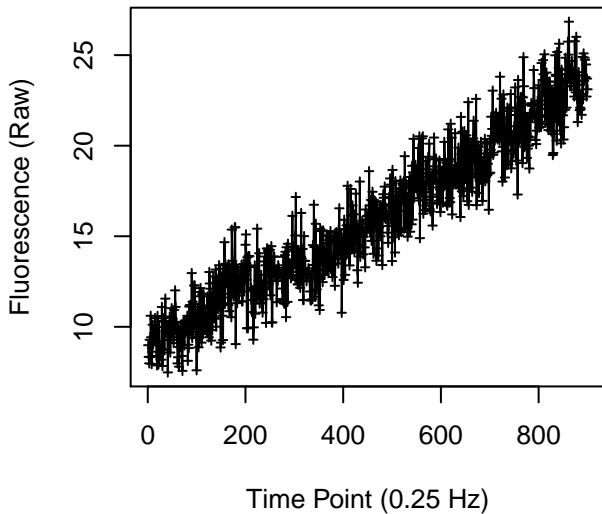

**Cell 1812**

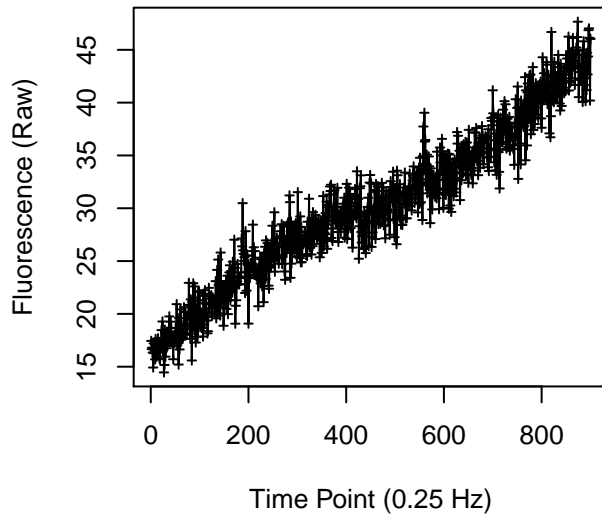

**Cell 1813**

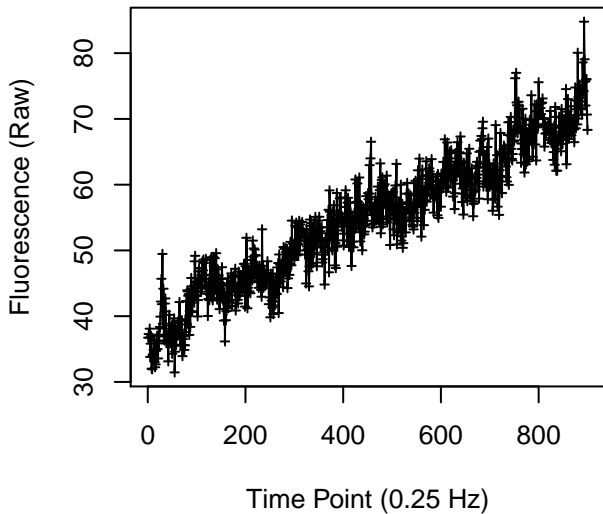

**Cell 1814**

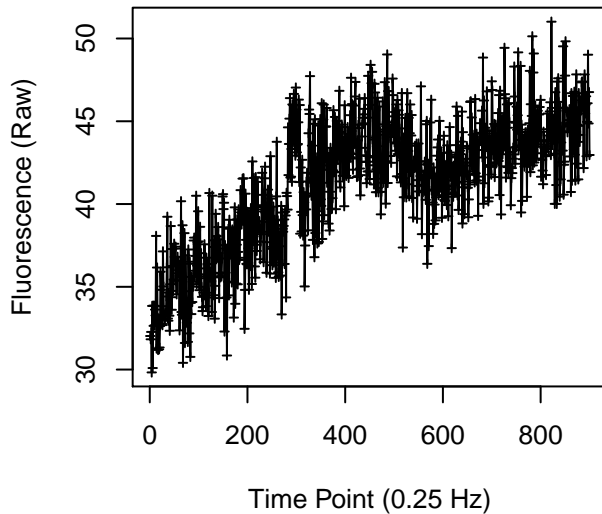

**Cell 1815**

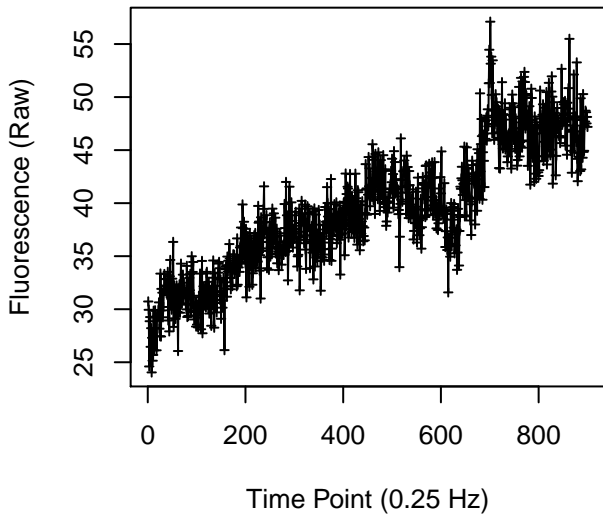

**Cell 1816**

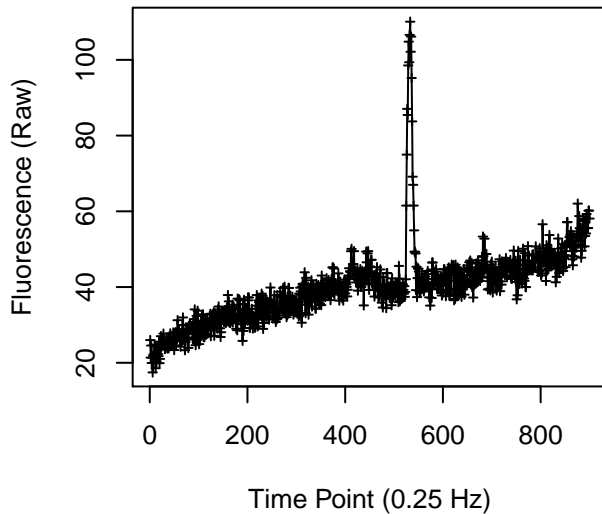

**Cell 1817**

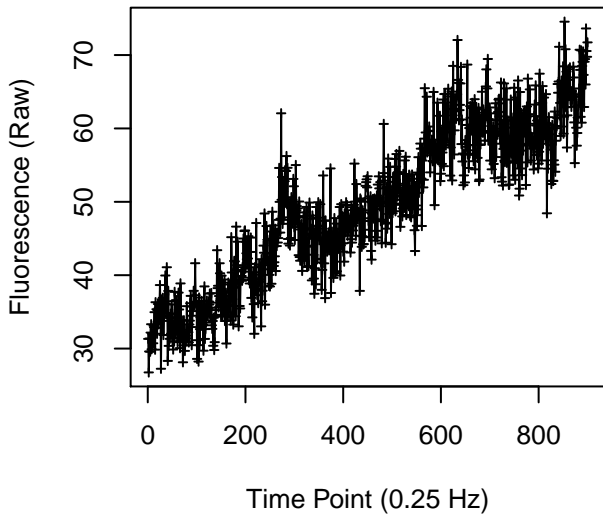

**Cell 1818**

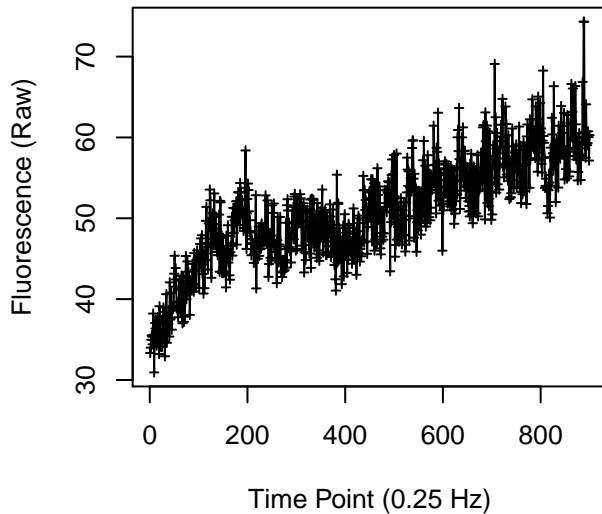

**Cell 1819**

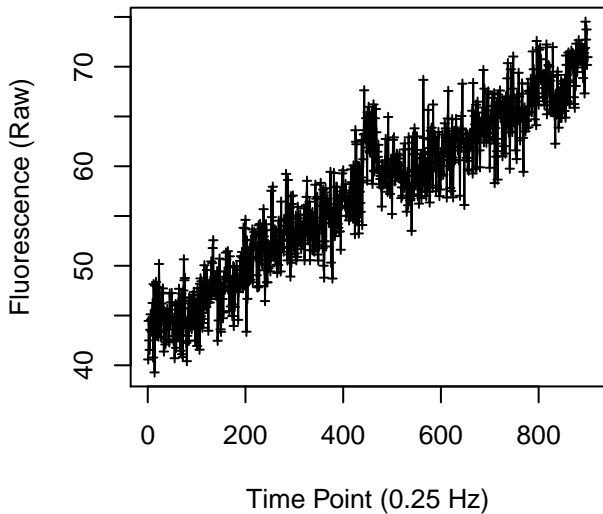

**Cell 1820**

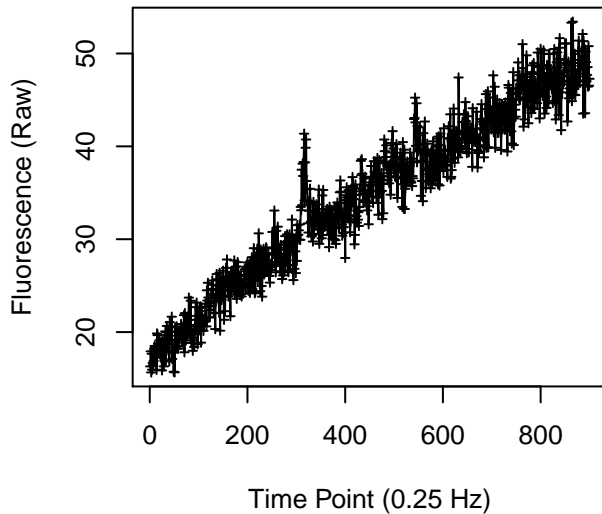

**Cell 1821**

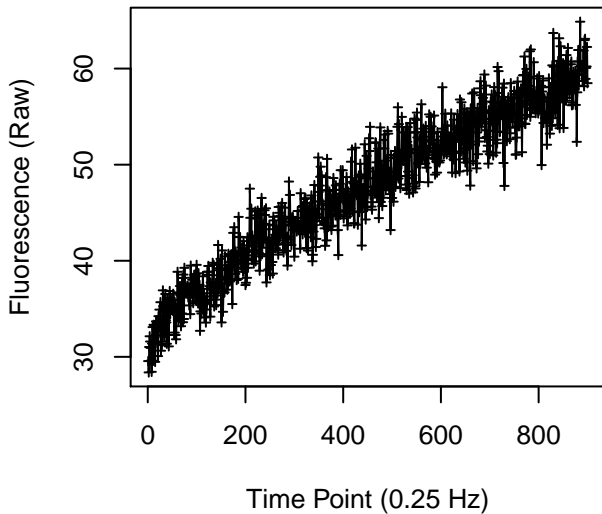

**Cell 1822**

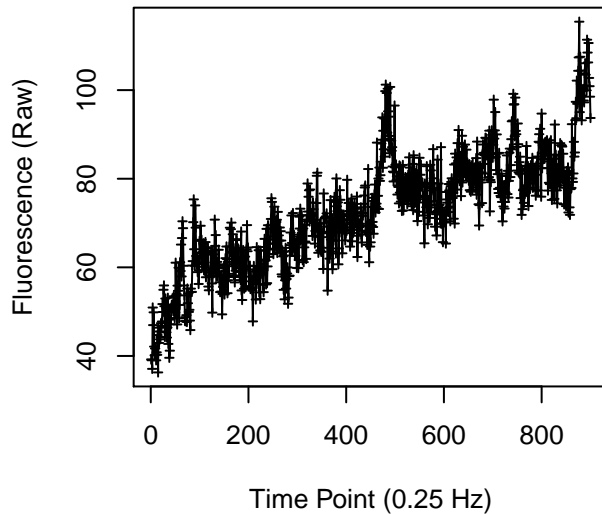

**Cell 1823**

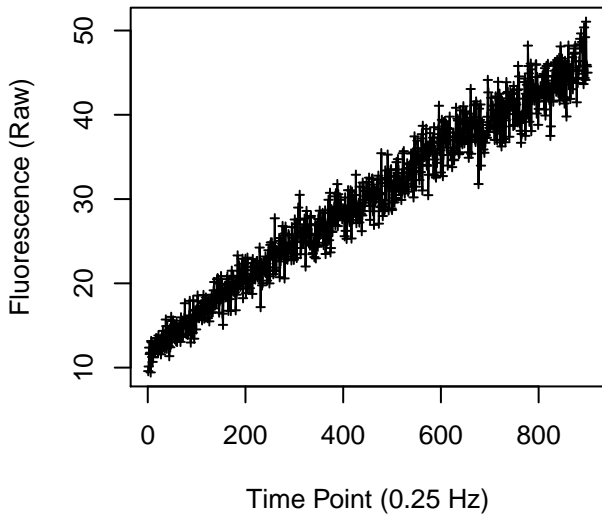

**Cell 1824**

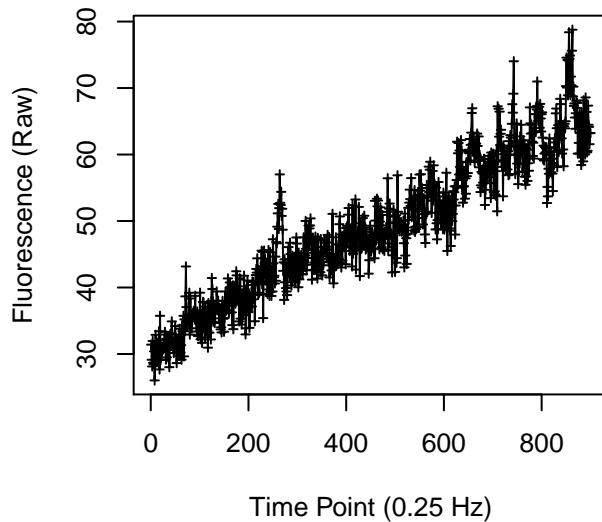

**Cell 1825**

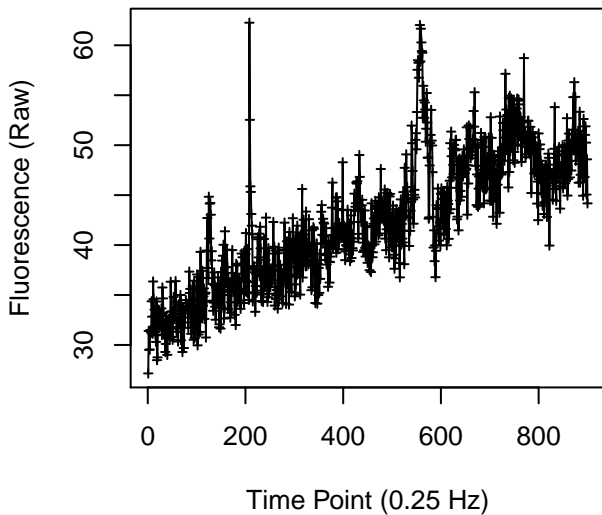

**Cell 1826**

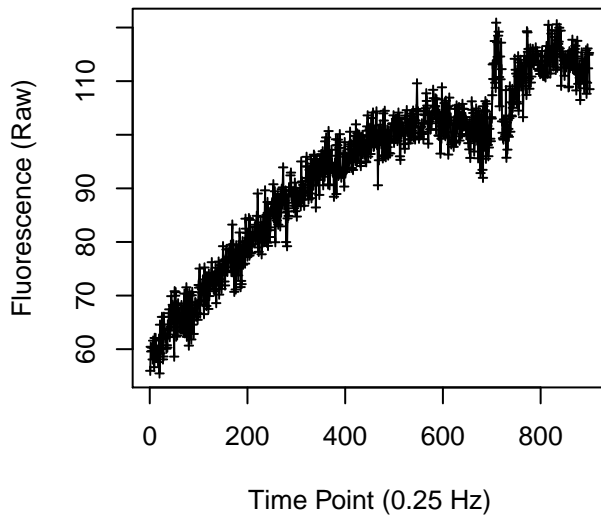

**Cell 1827**

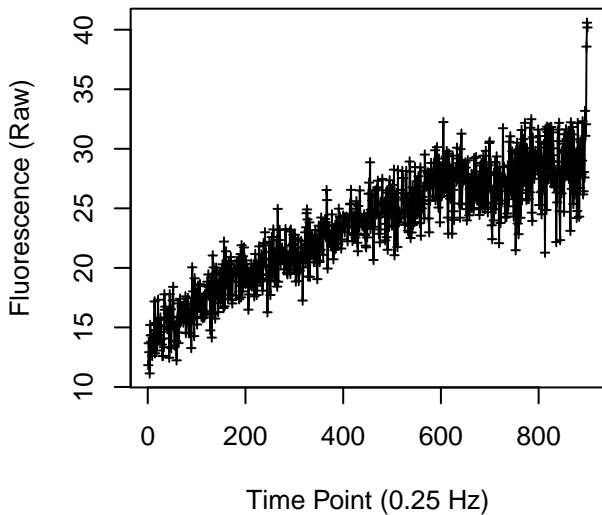

**Cell 1828**

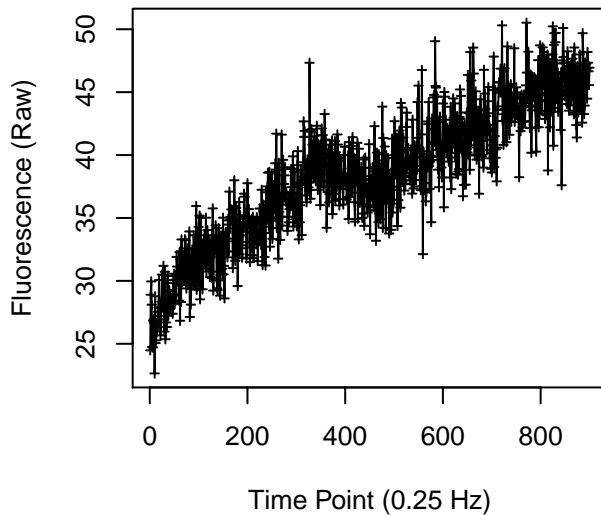

**Cell 1829**

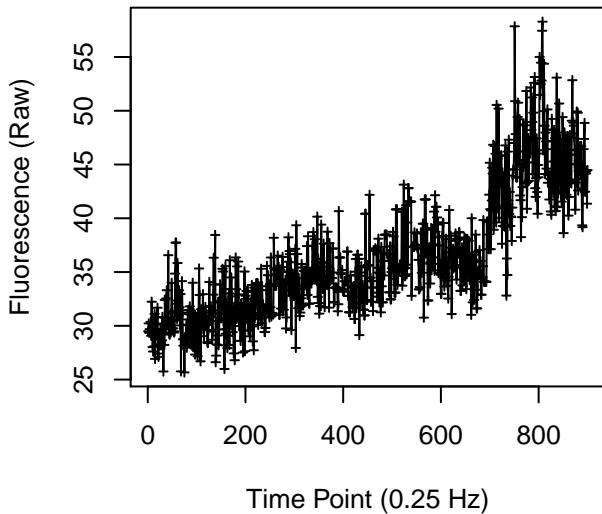

**Cell 1830**

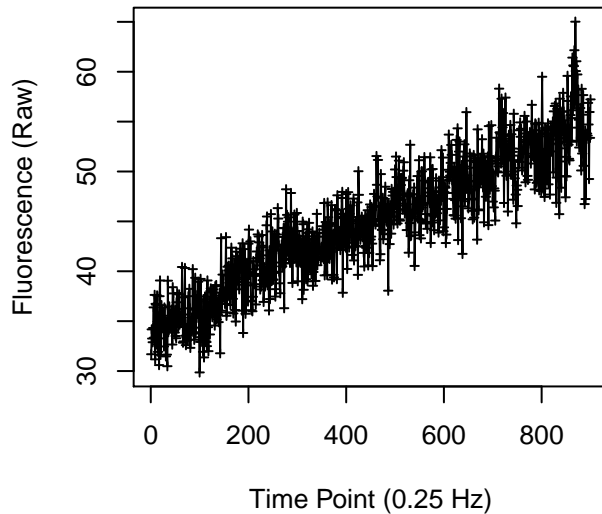

**Cell 1831**

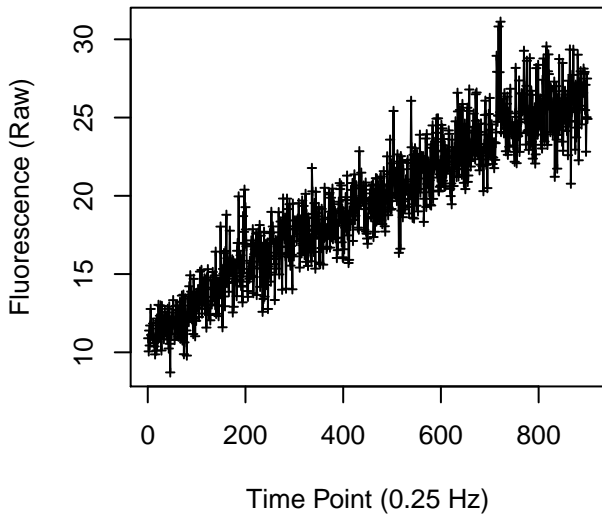

**Cell 1832**

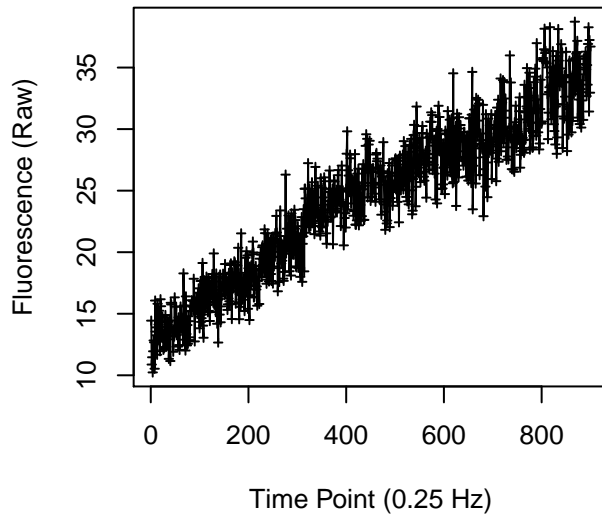



**Cell 1833**

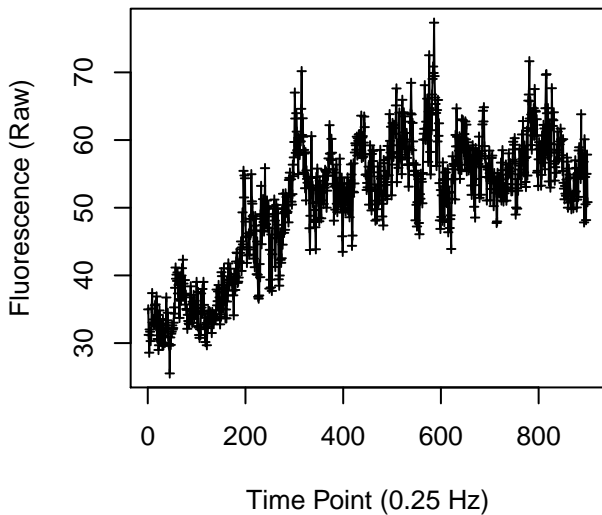

**Cell 1834**

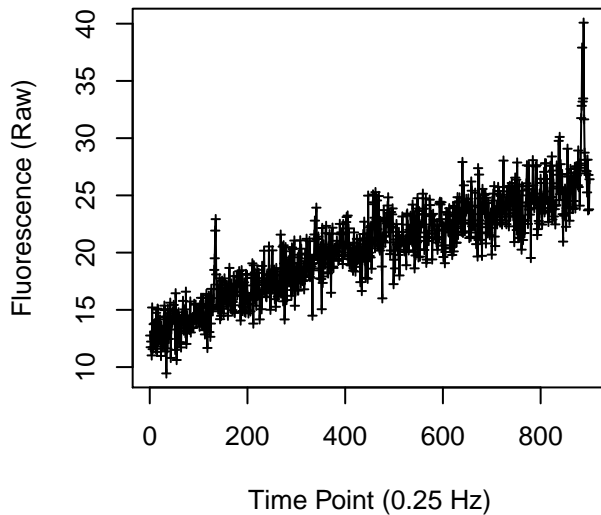

**Cell 1835**

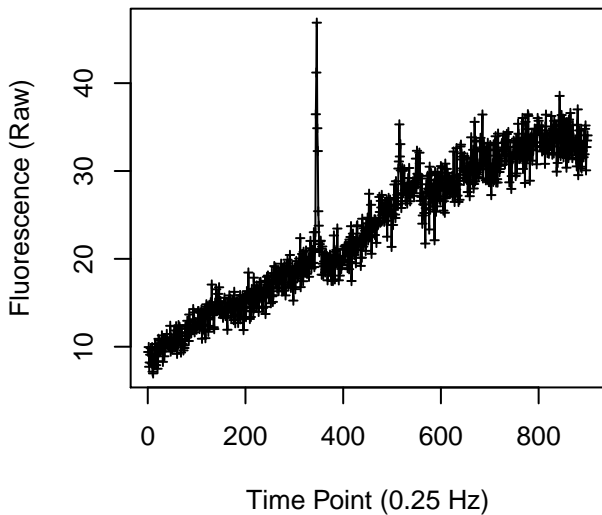

**Cell 1836**

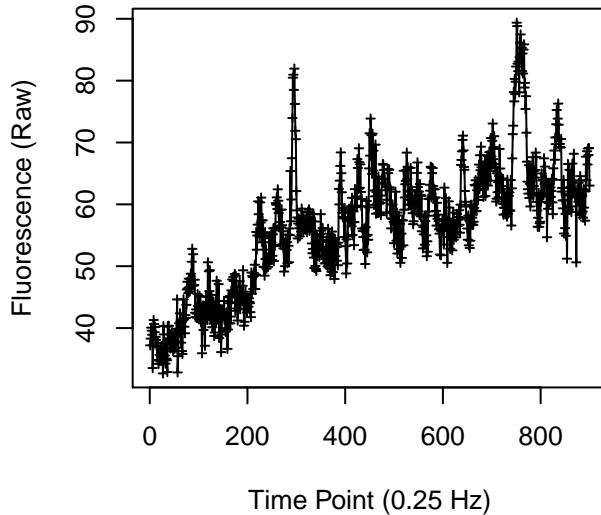

**Cell 1837**

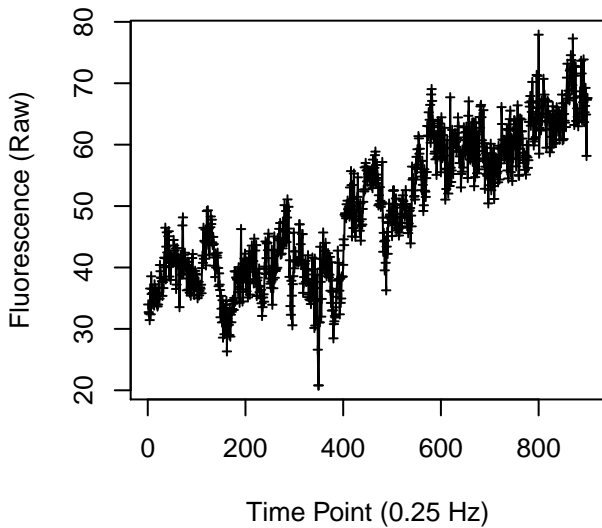

**Cell 1838**

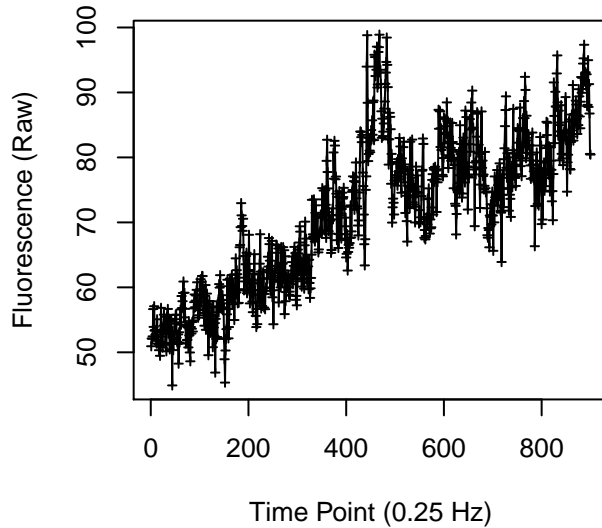

**Cell 1839**

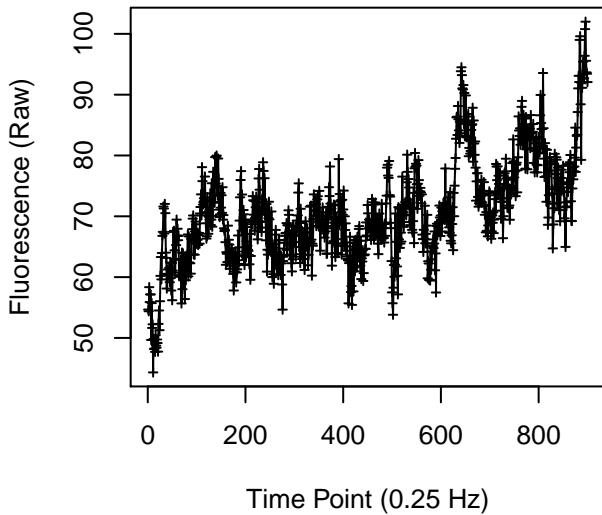

**Cell 1840**

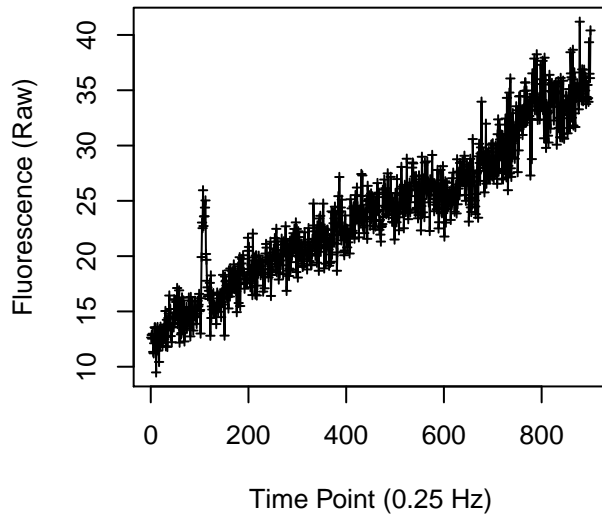

**Cell 1841**

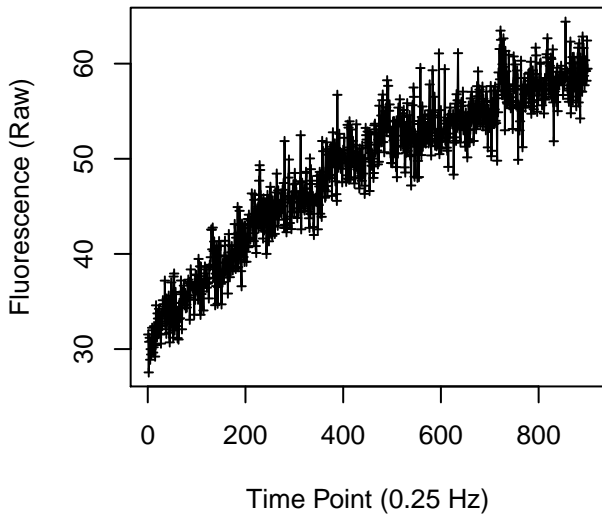

**Cell 1842**

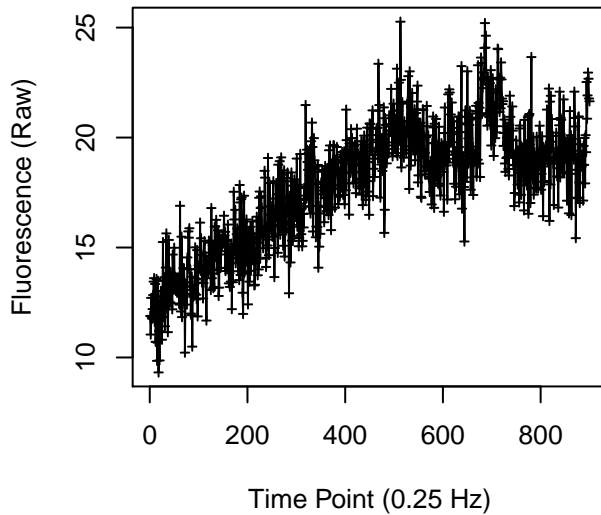

**Cell 1843**

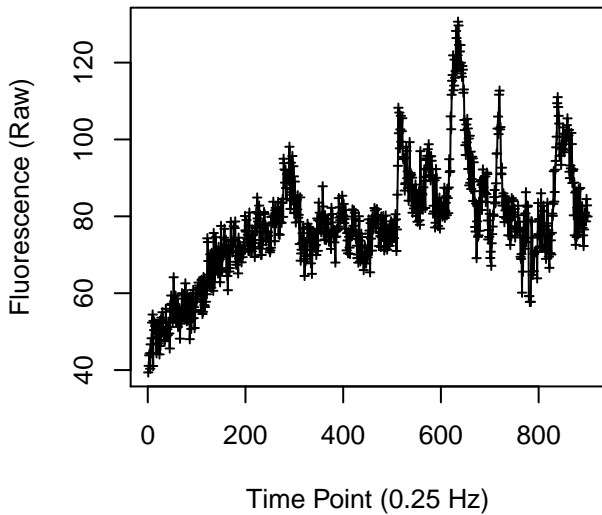

**Cell 1844**

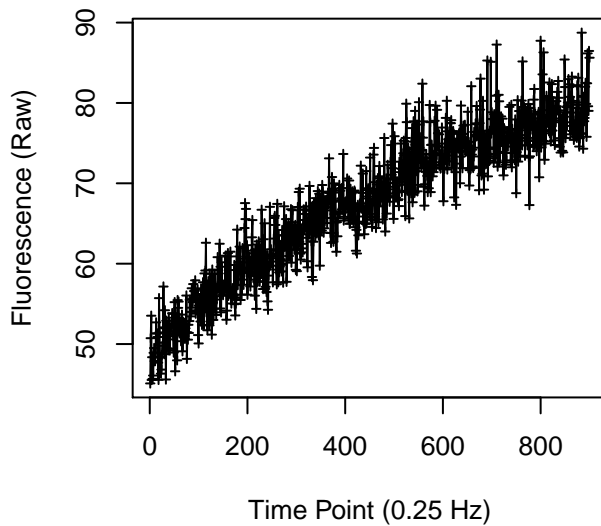

**Cell 1845**

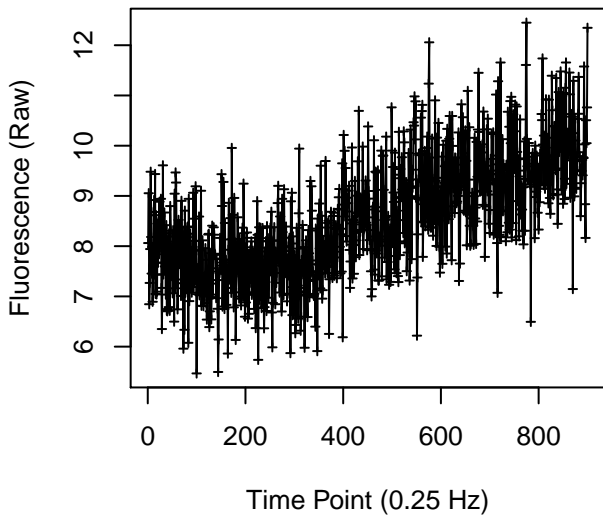

**Cell 1846**

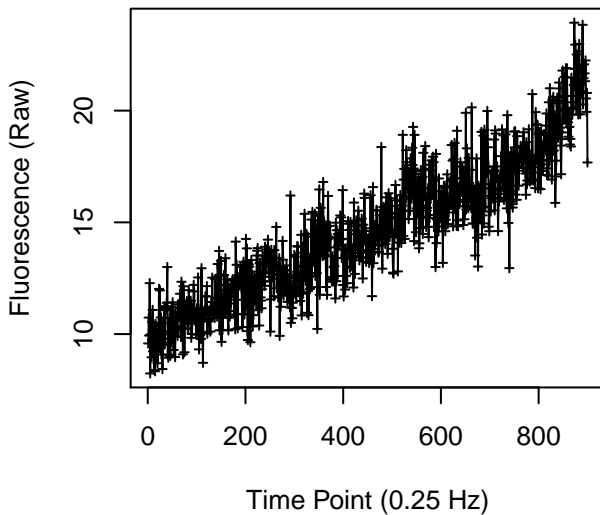

**Cell 1847**

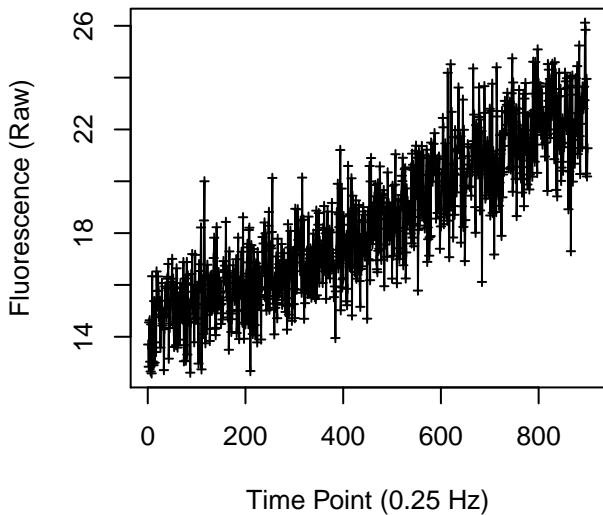

**Cell 1848**

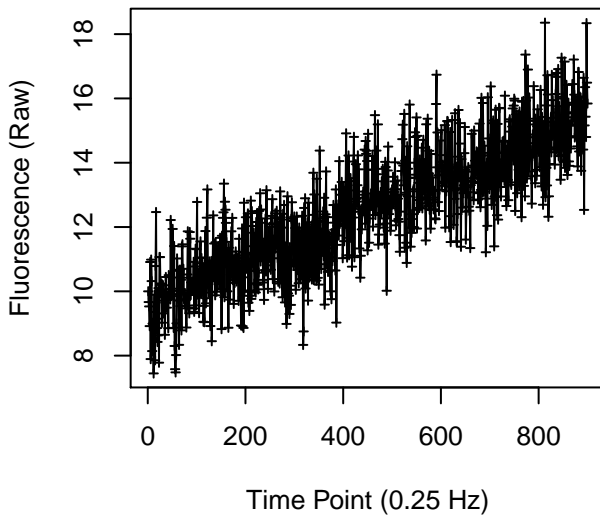

**Cell 1849**

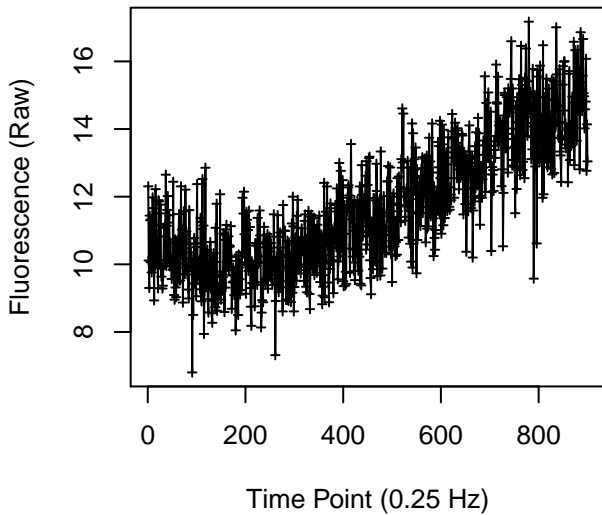

**Cell 1850**

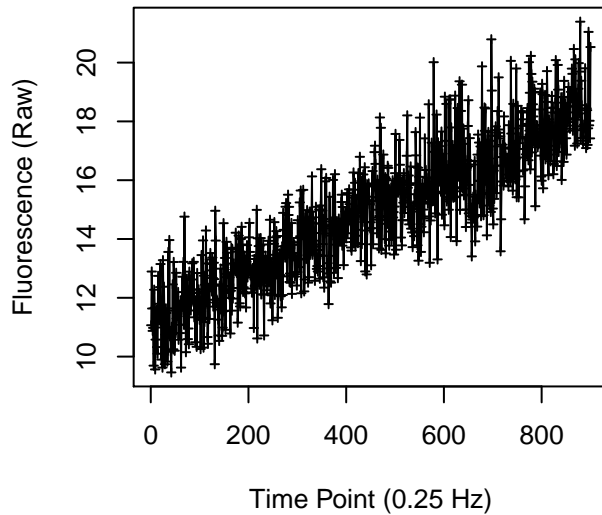

**Cell 1851**

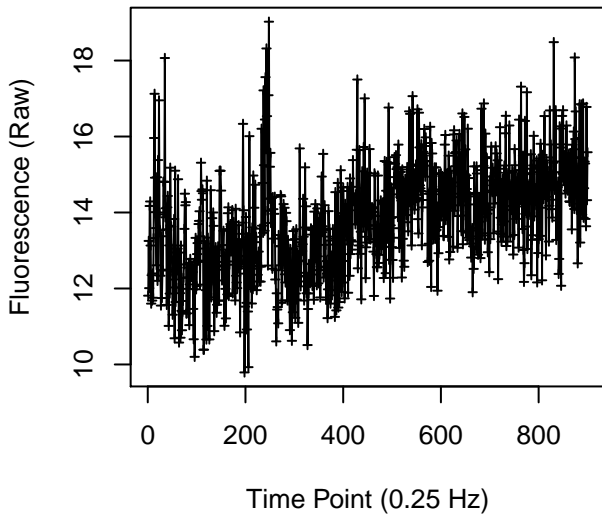

**Cell 1852**

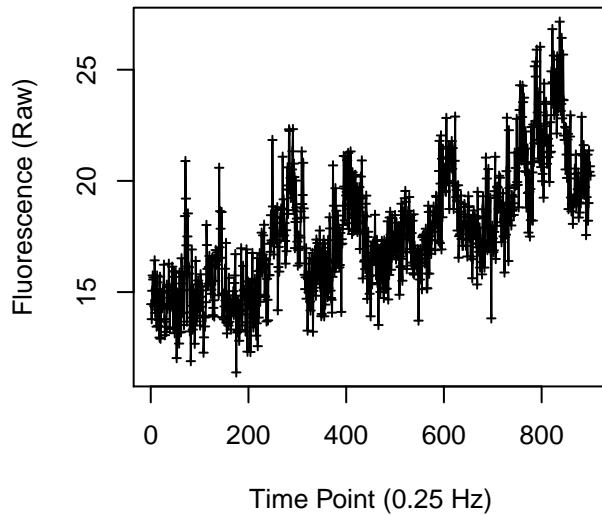

**Cell 1853**

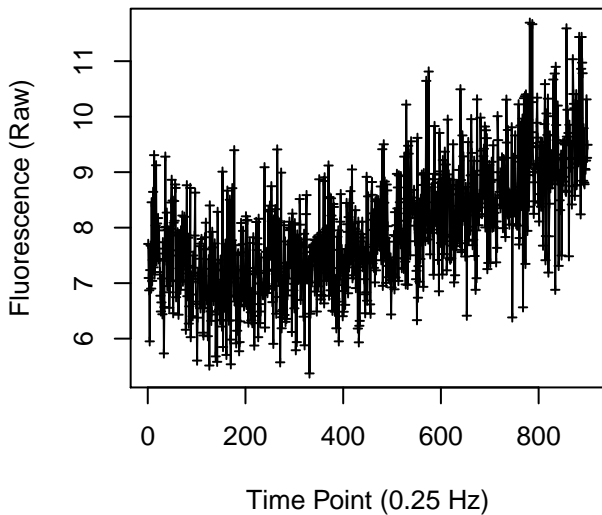

**Cell 1854**

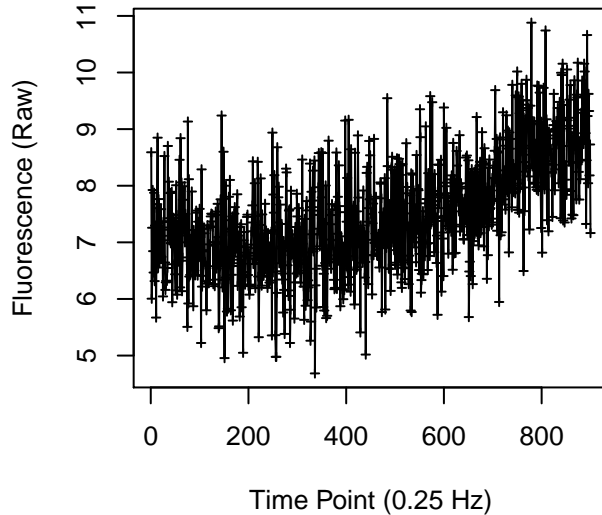

**Cell 1855**

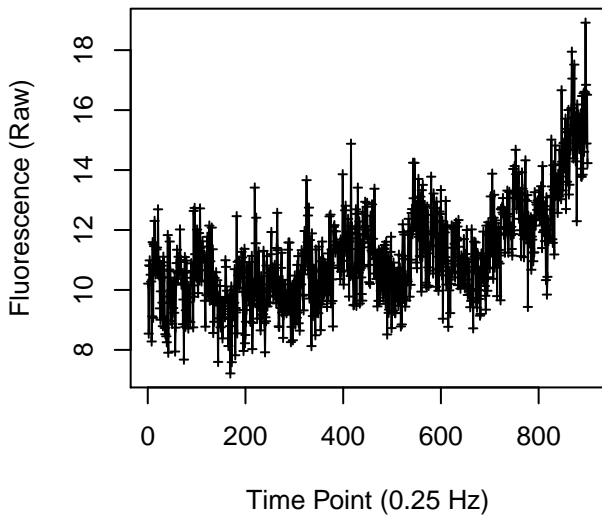

**Cell 1856**

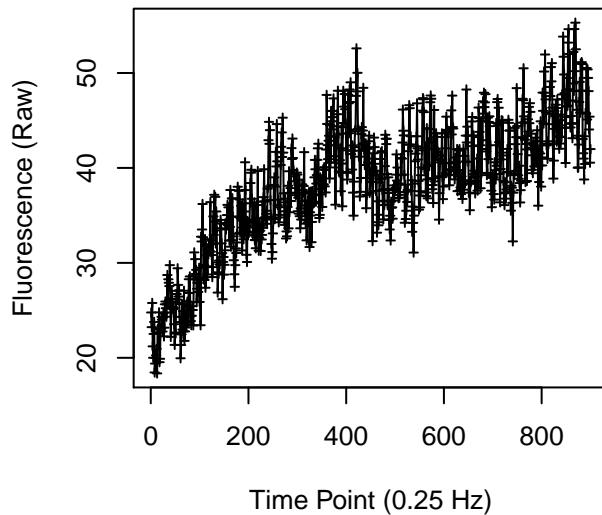

**Cell 1857**

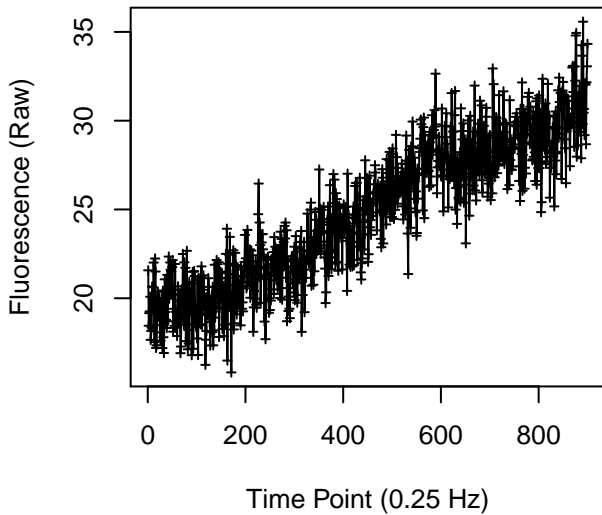

**Cell 1858**

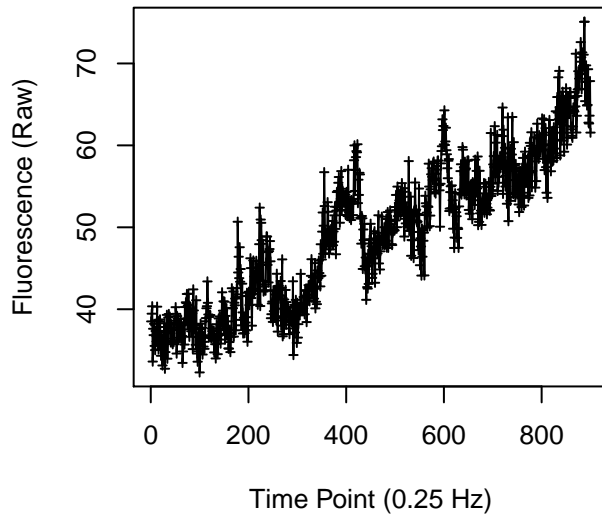

**Cell 1859**

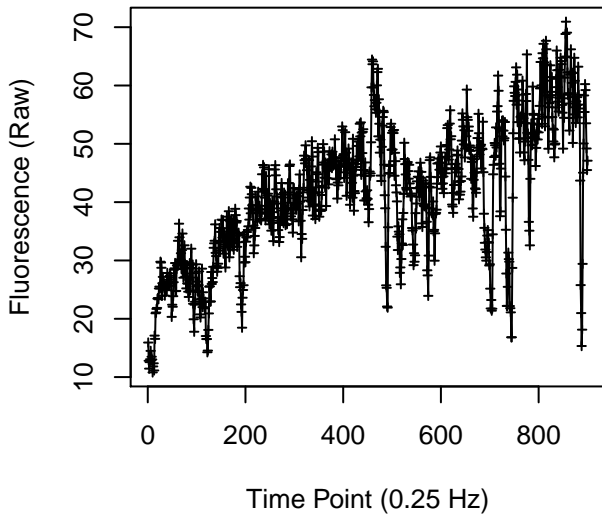

**Cell 1860**

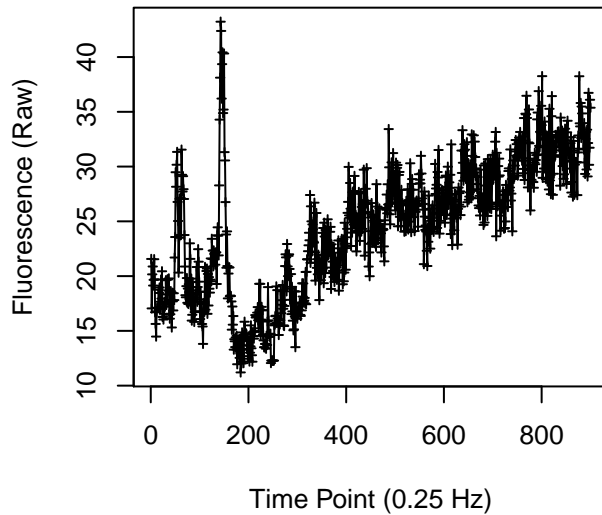

**Cell 1861**

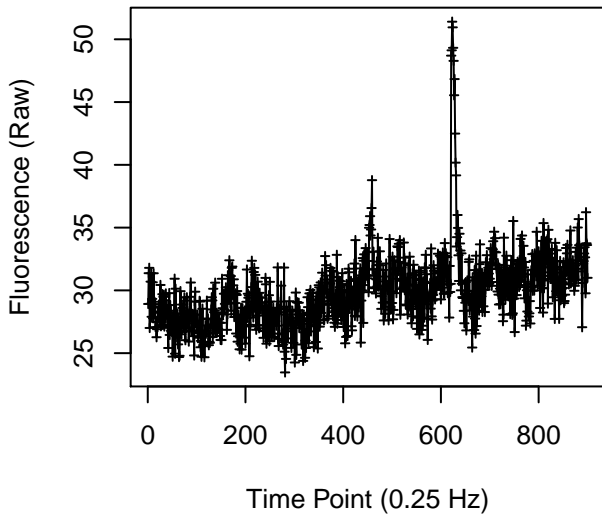

**Cell 1862**

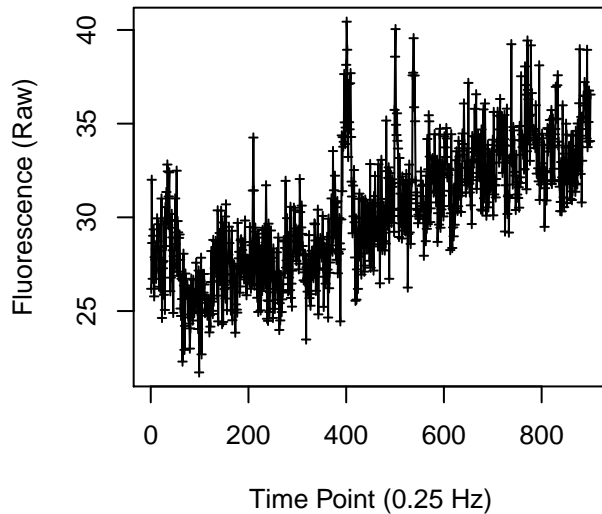

**Cell 1863**

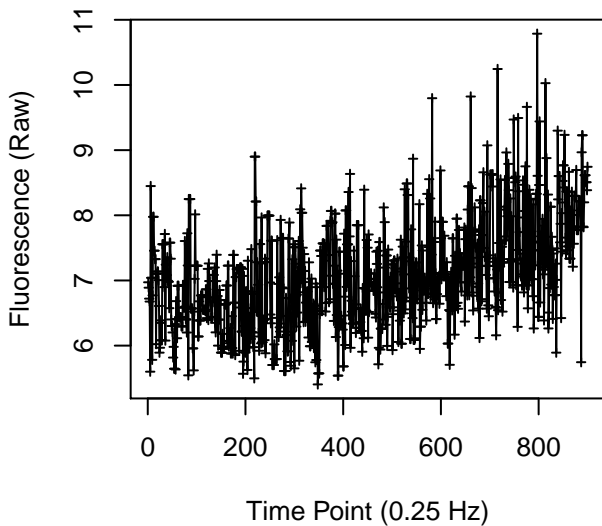

**Cell 1864**

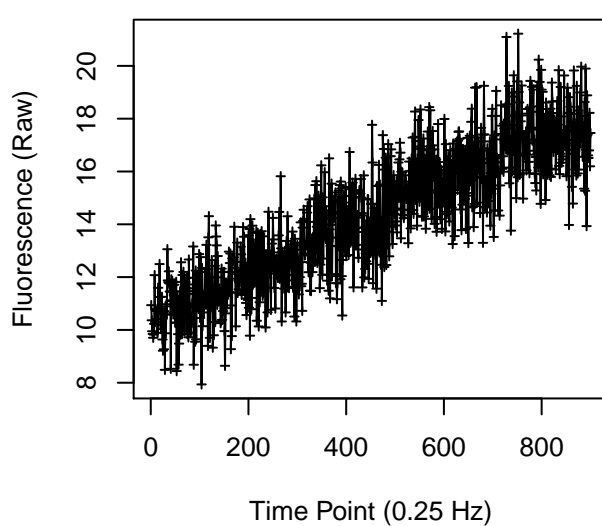



**Cell 1865**

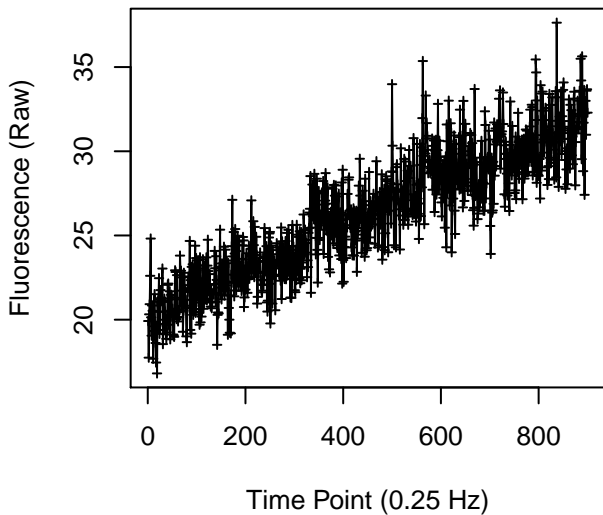

**Cell 1866**

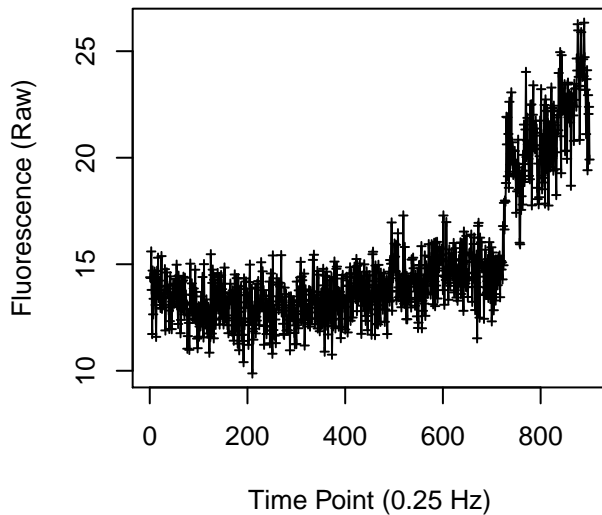

**Cell 1867**

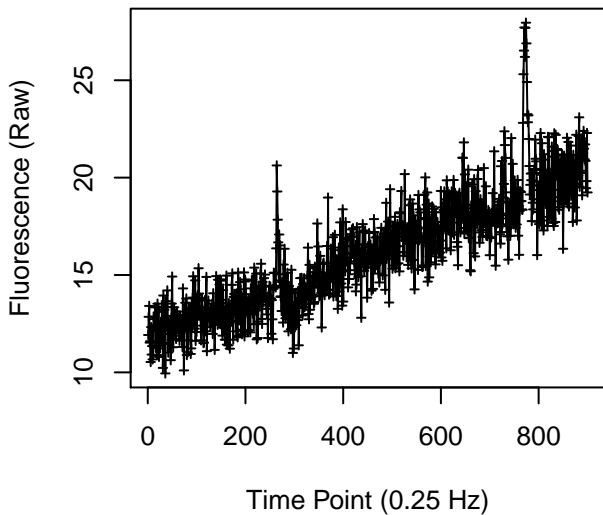

**Cell 1868**

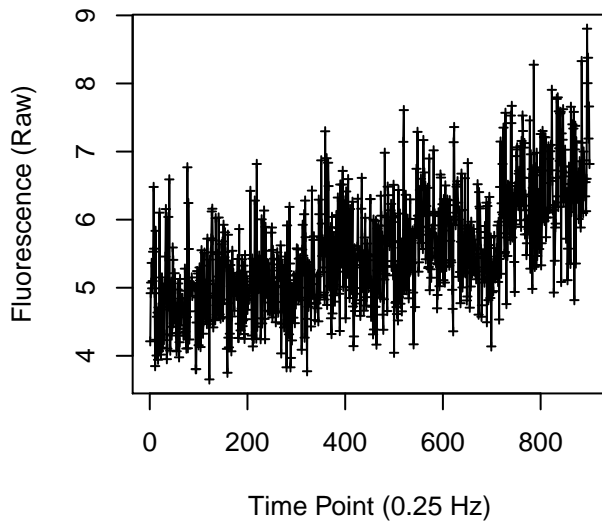

**Cell 1869**

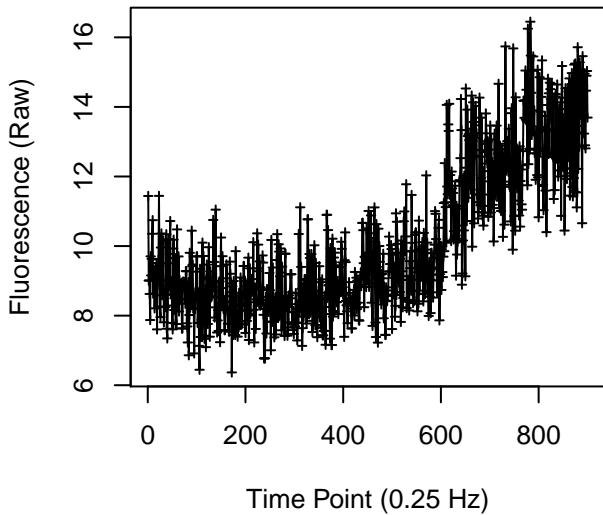

**Cell 1870**

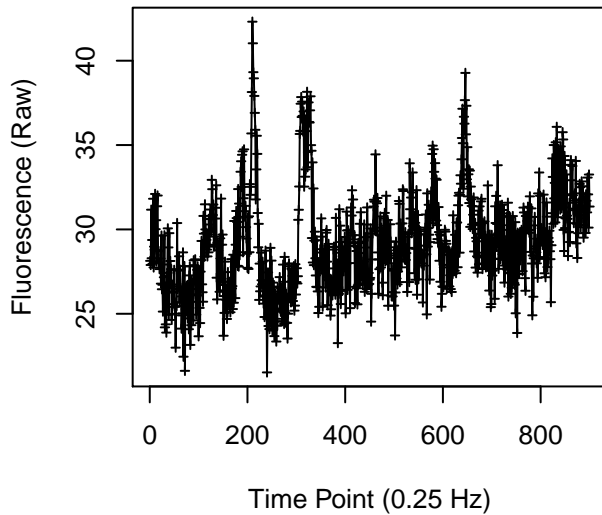

**Cell 1871**

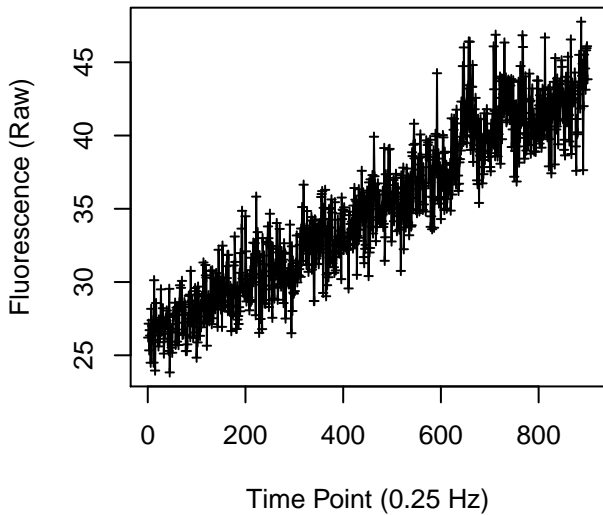

**Cell 1872**

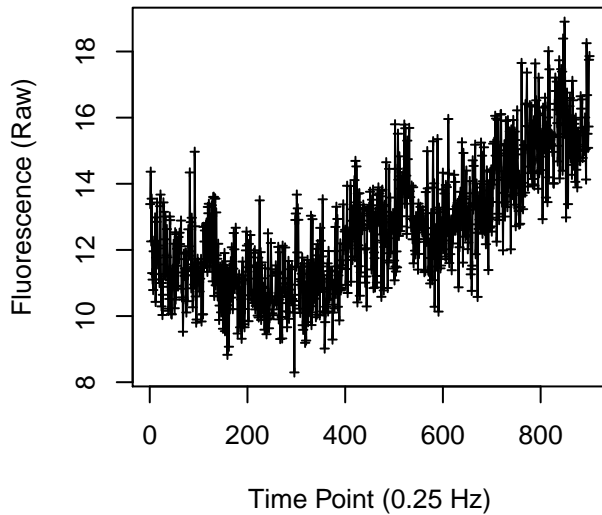

**Cell 1873**

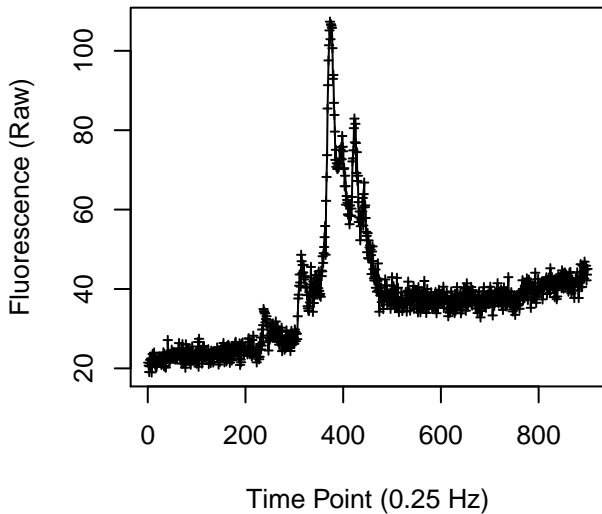

**Cell 1874**

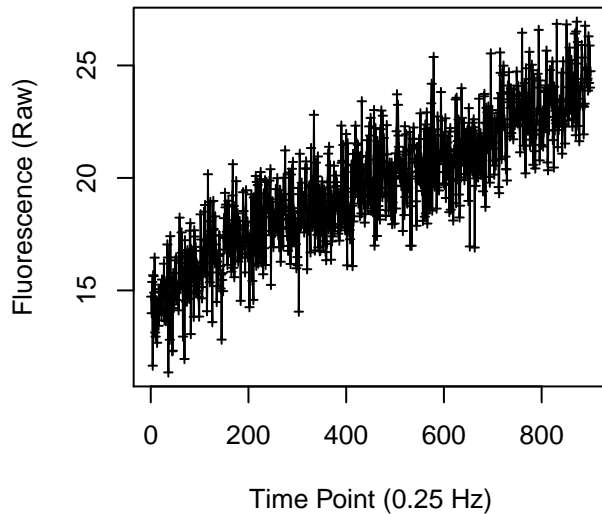

**Cell 1875**

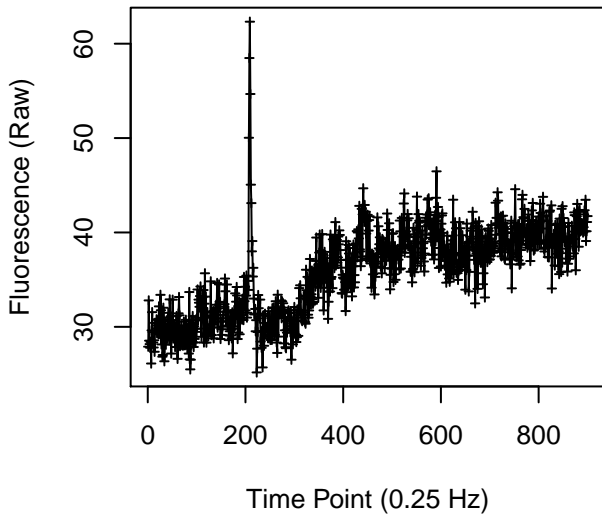

**Cell 1876**

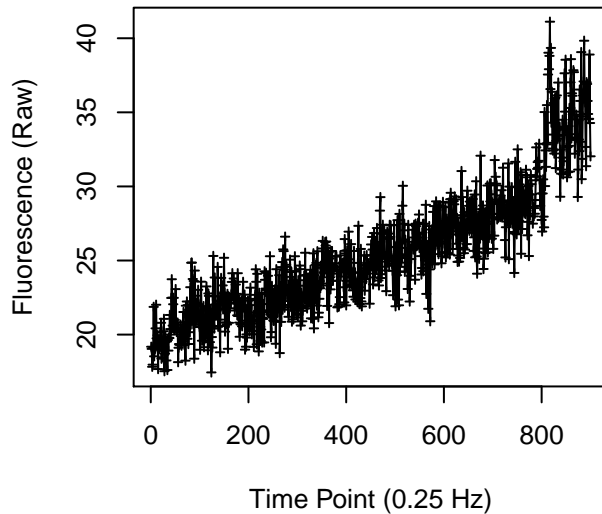

**Cell 1877**

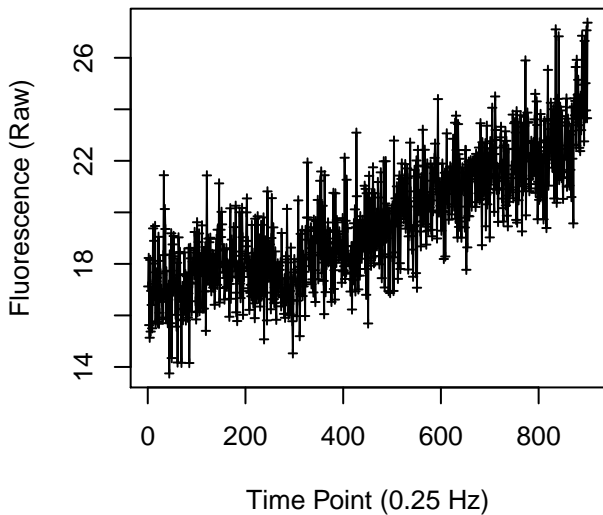

**Cell 1878**

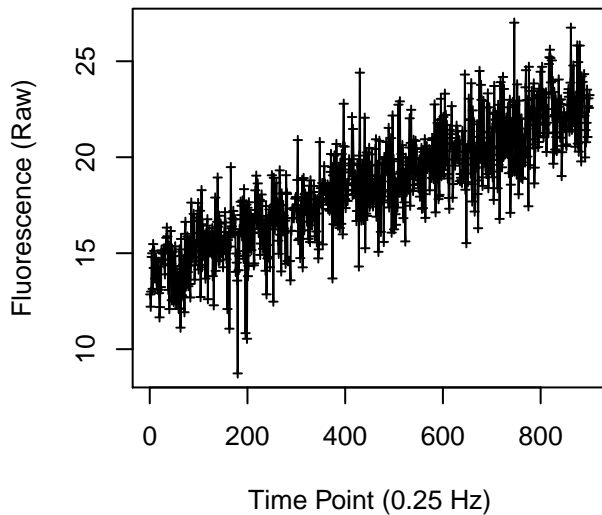

**Cell 1879**

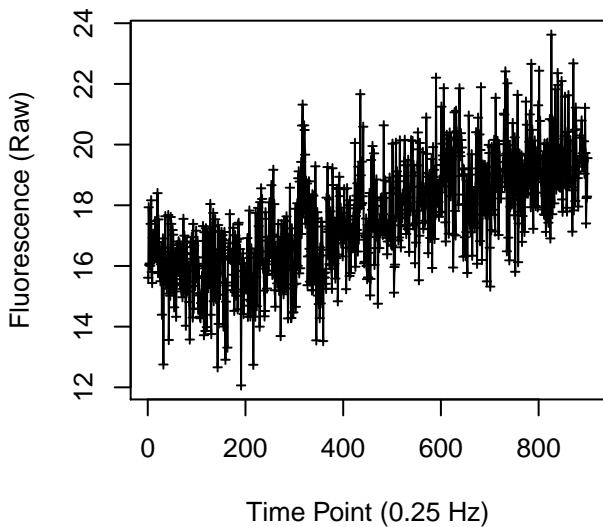

**Cell 1880**

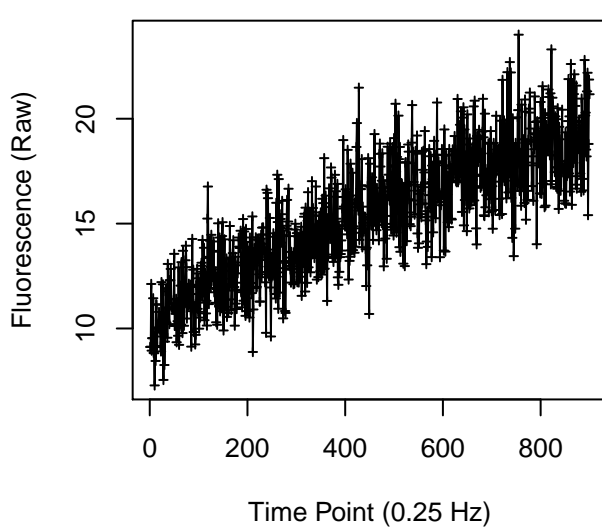

**Cell 1881**

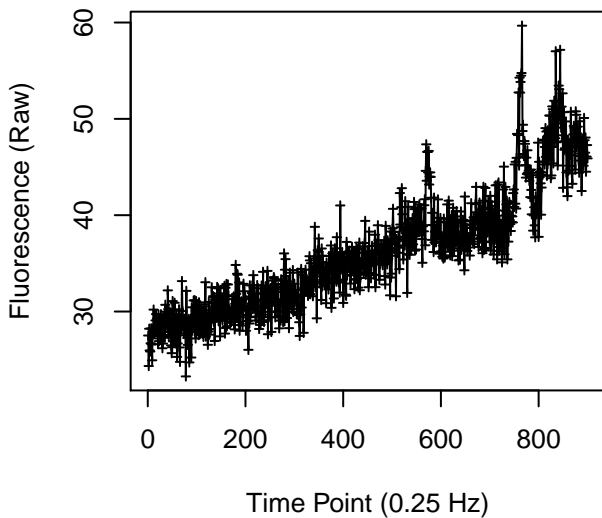

**Cell 1882**

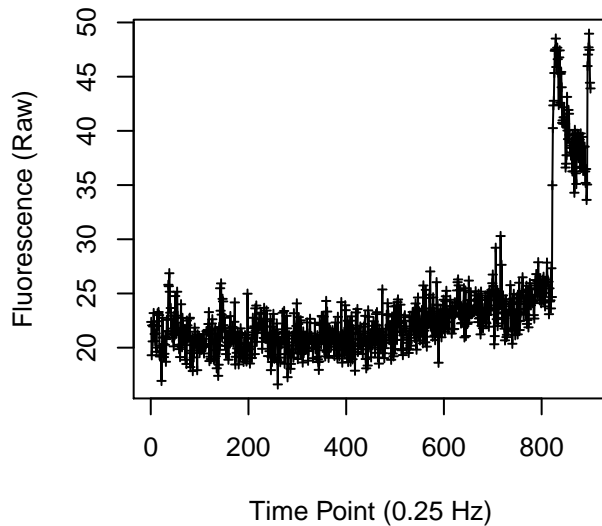

**Cell 1883**

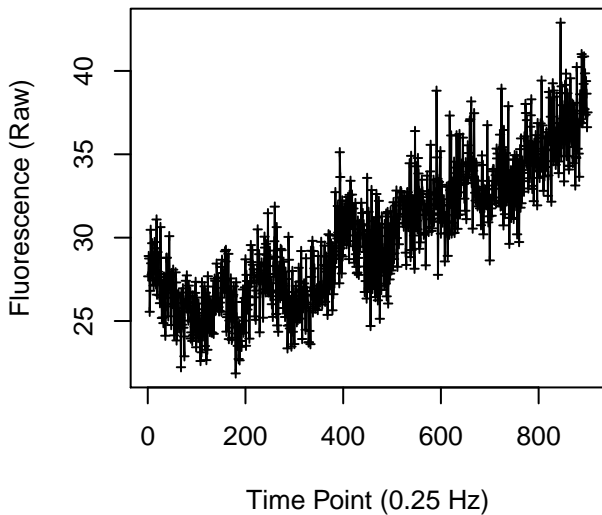

**Cell 1884**

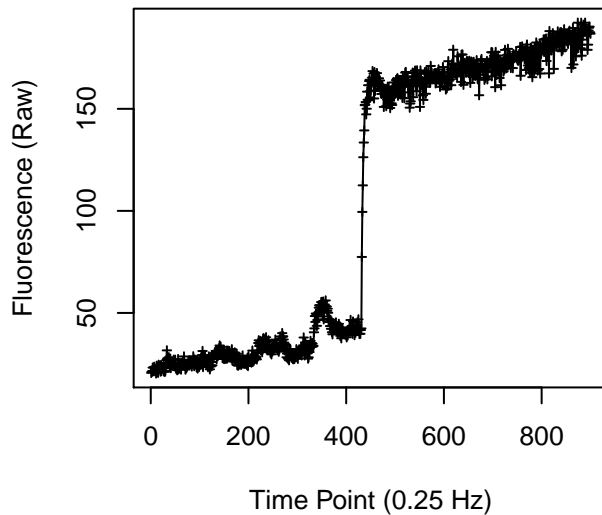

**Cell 1885**

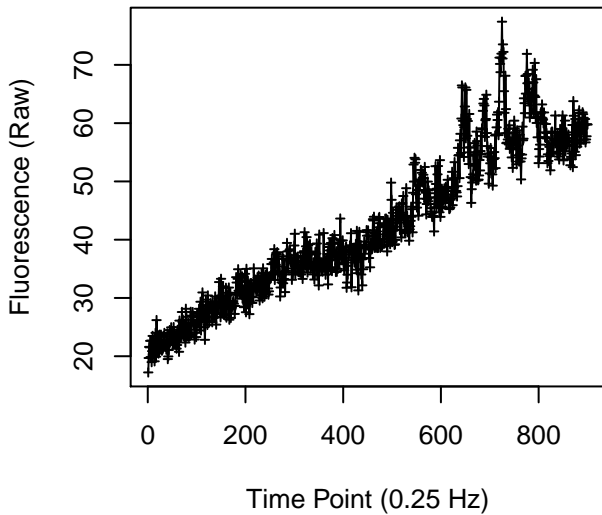

**Cell 1886**

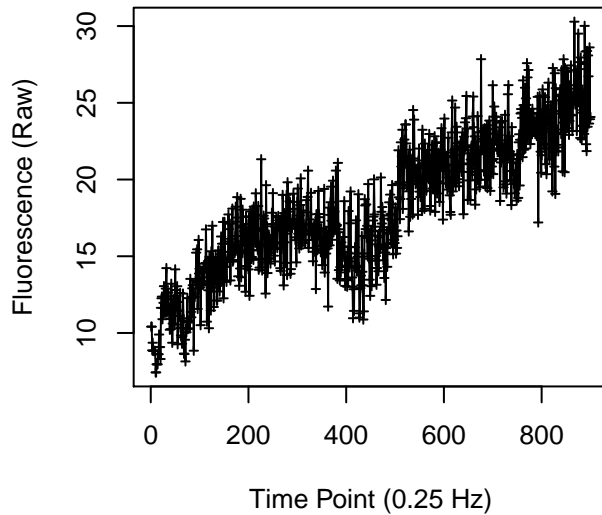

**Cell 1887**

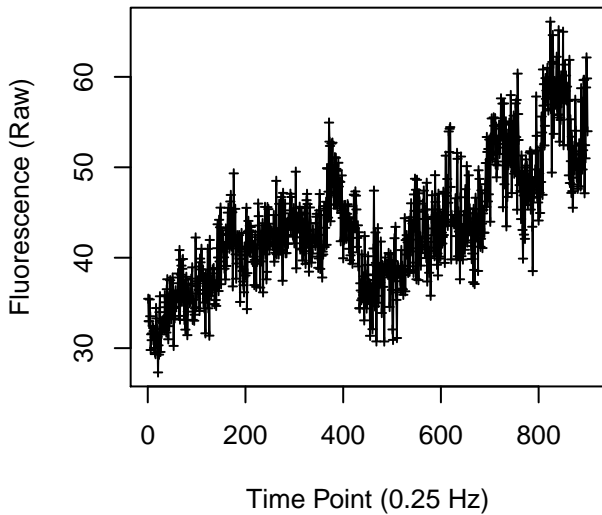

**Cell 1888**

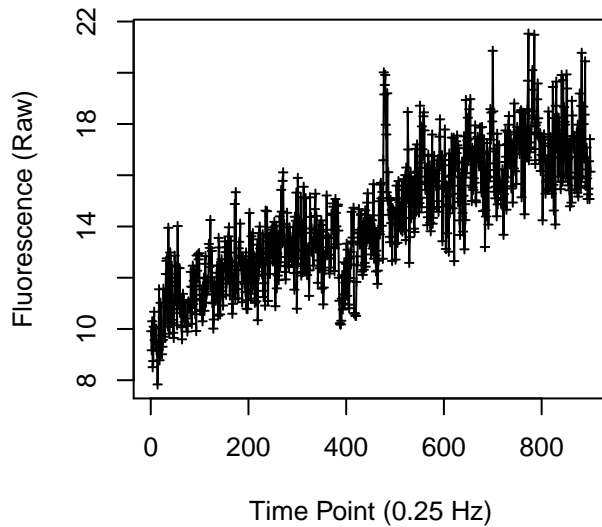

**Cell 1889**

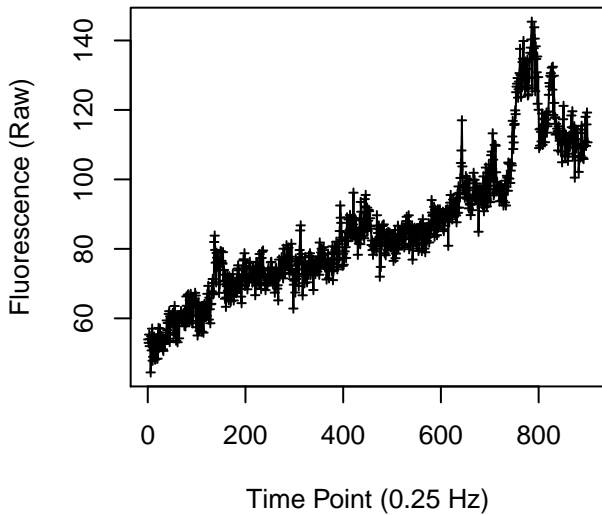

**Cell 1890**

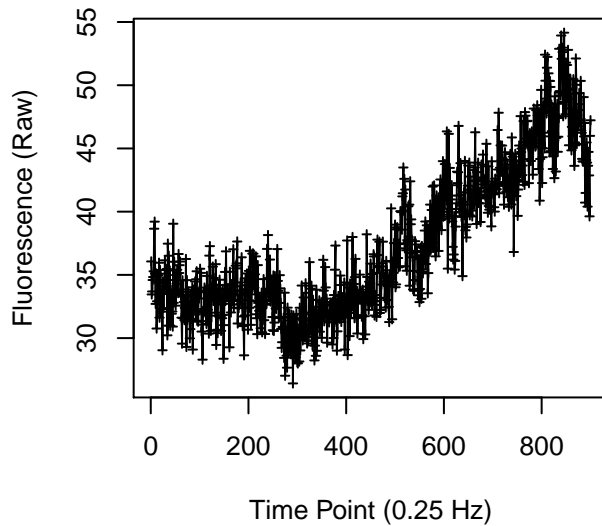

**Cell 1891**

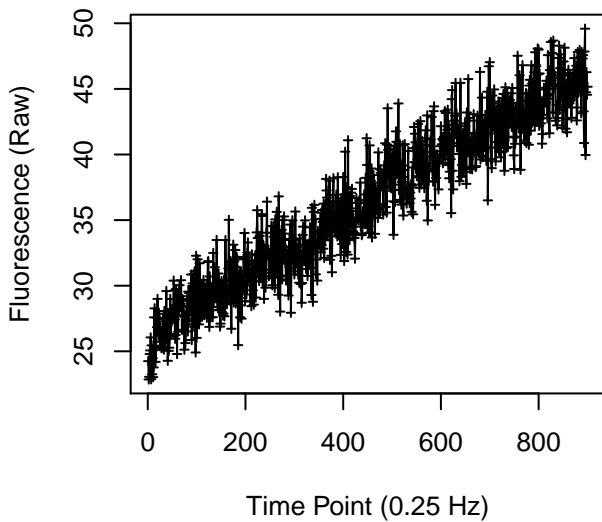

**Cell 1892**

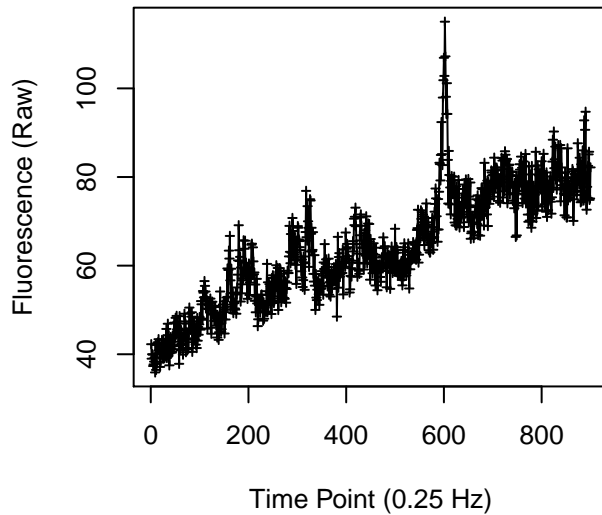

**Cell 1893**

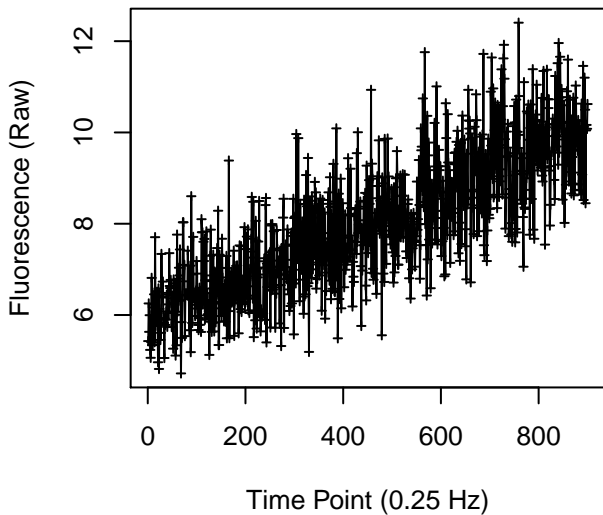

**Cell 1894**

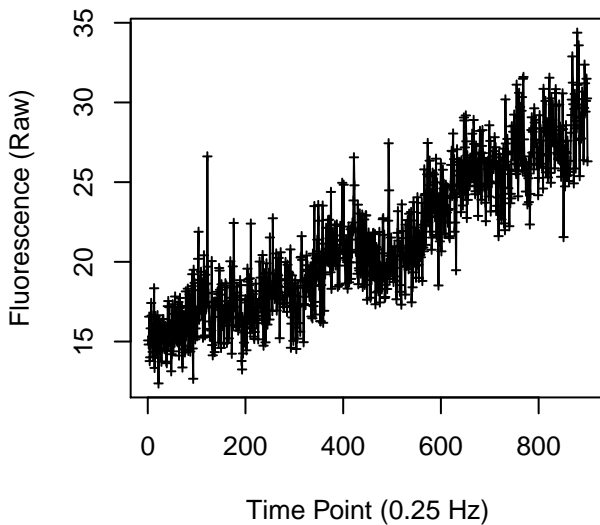

**Cell 1895**

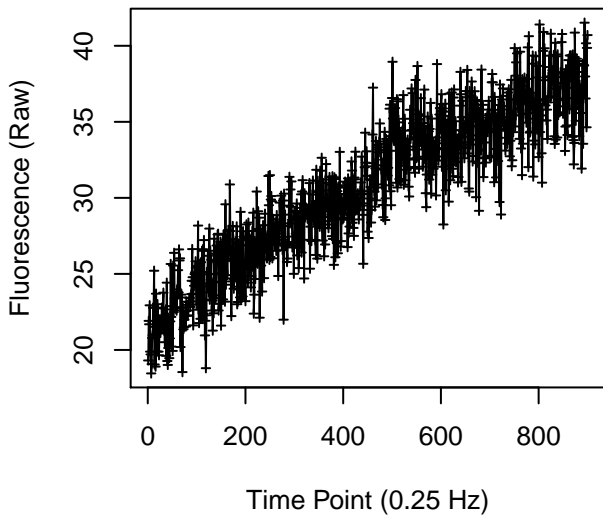

**Cell 1896**

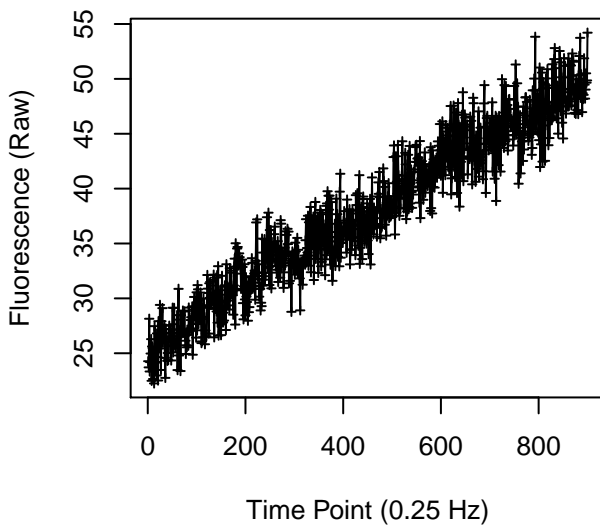



**Cell 1897**

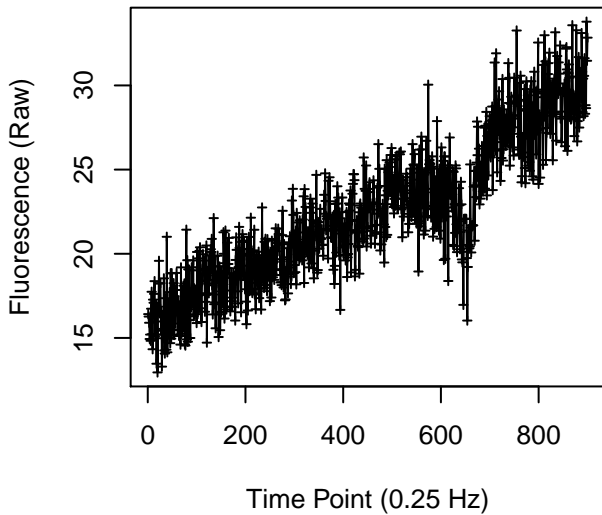

**Cell 1898**

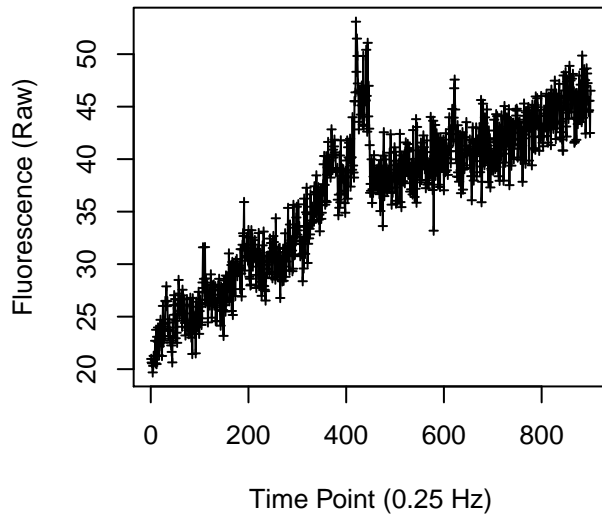

**Cell 1899**

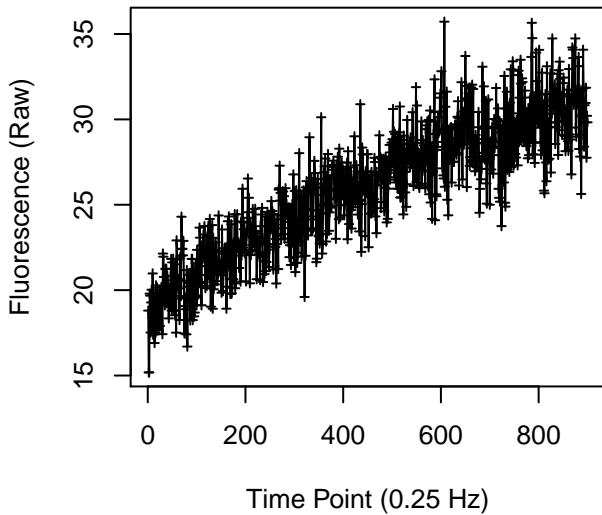

**Cell 1900**

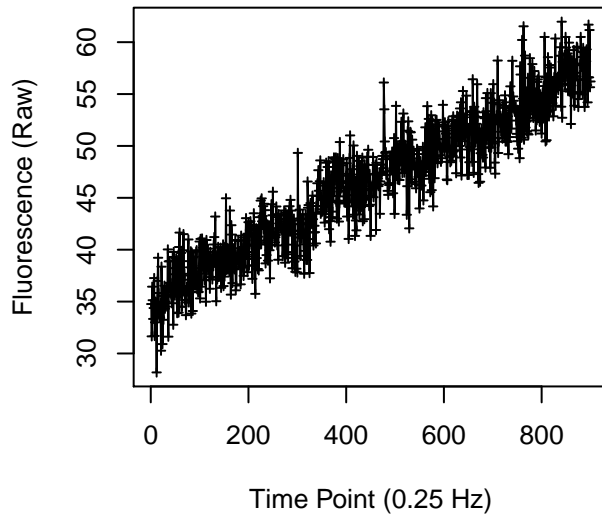

**Cell 1901**

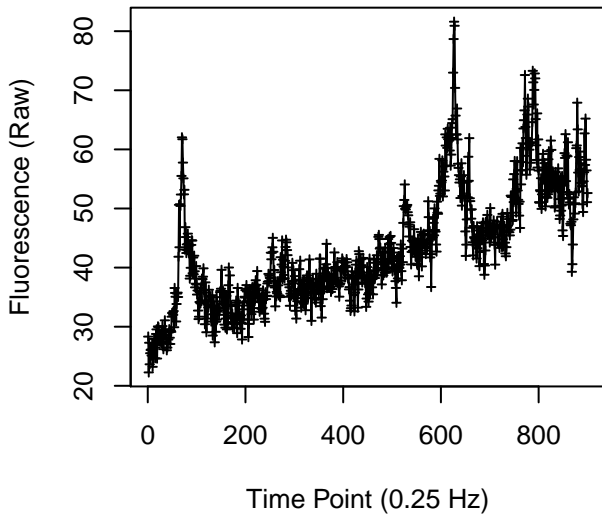

**Cell 1902**

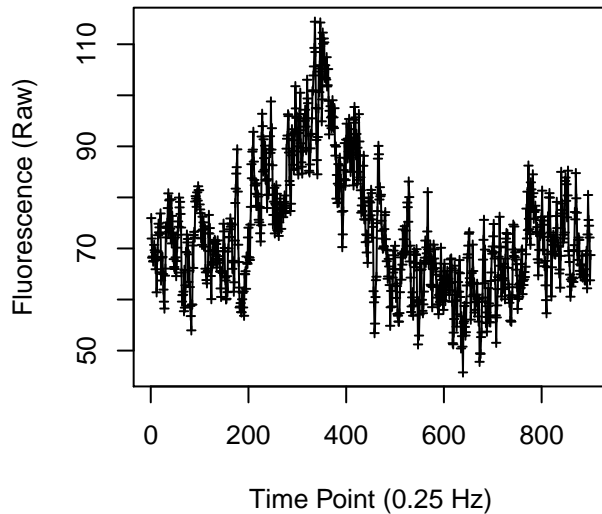

**Cell 1903**

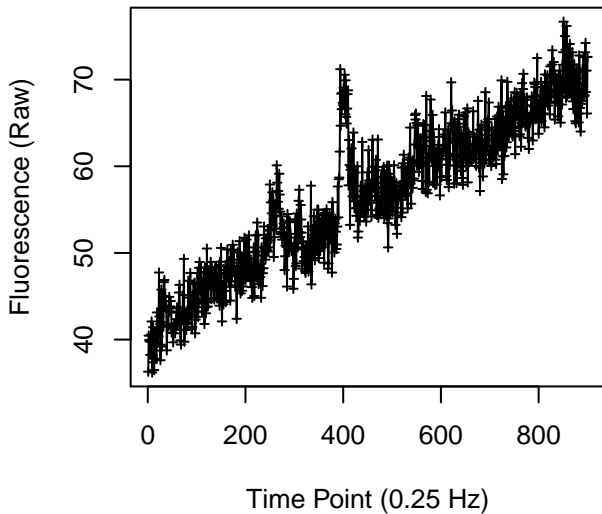

**Cell 1904**

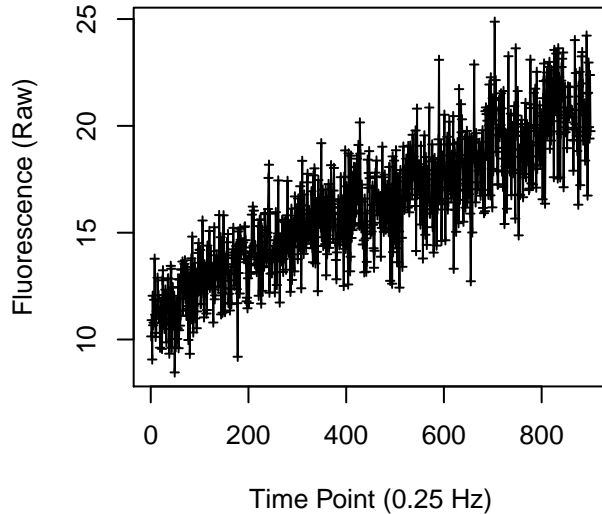

**Cell 1905**

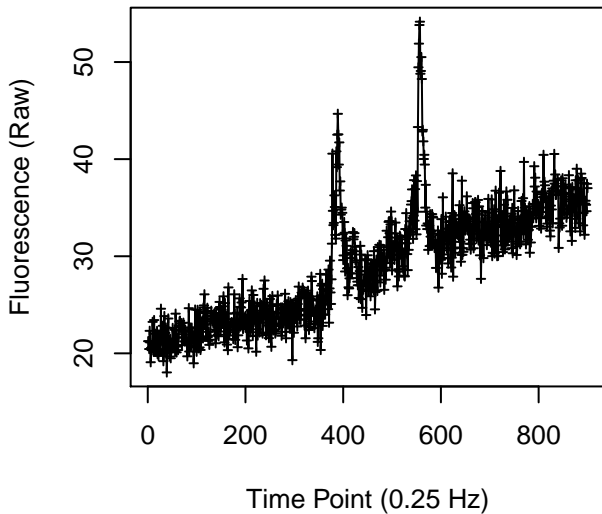

**Cell 1906**

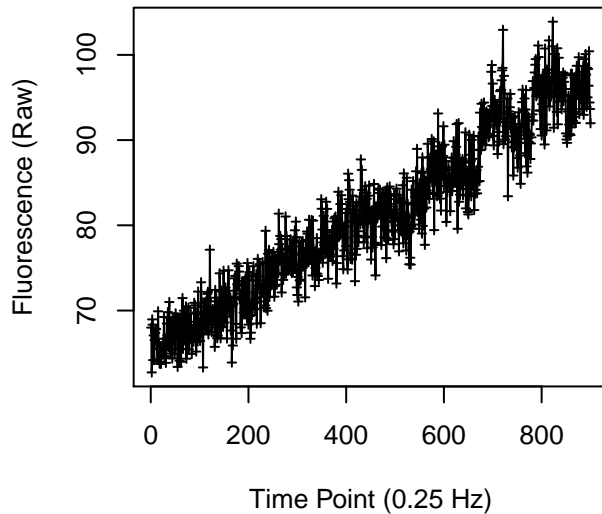

**Cell 1907**

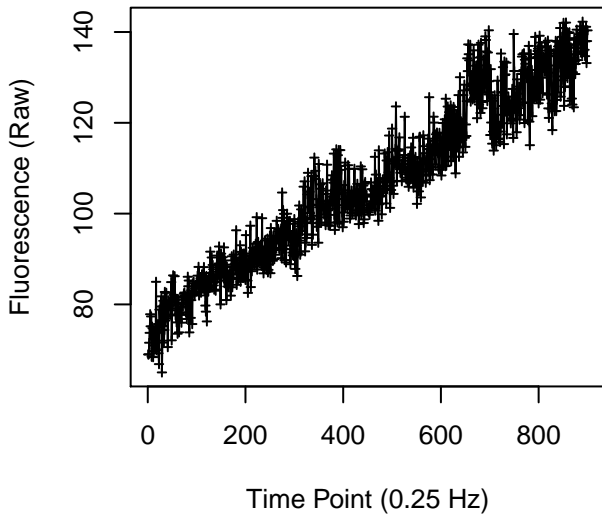

**Cell 1908**

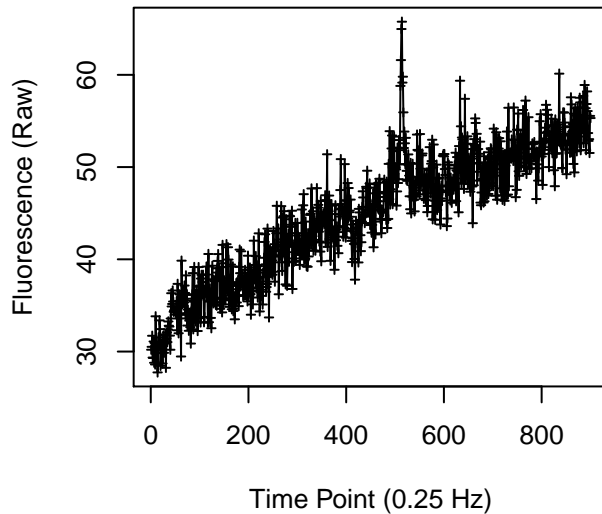

**Cell 1909**

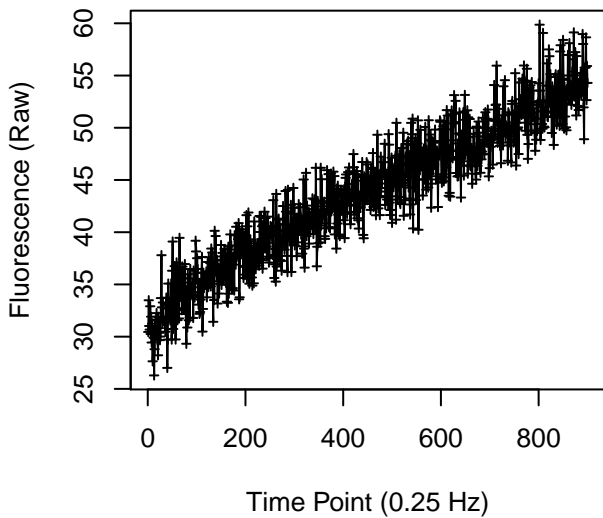

**Cell 1910**

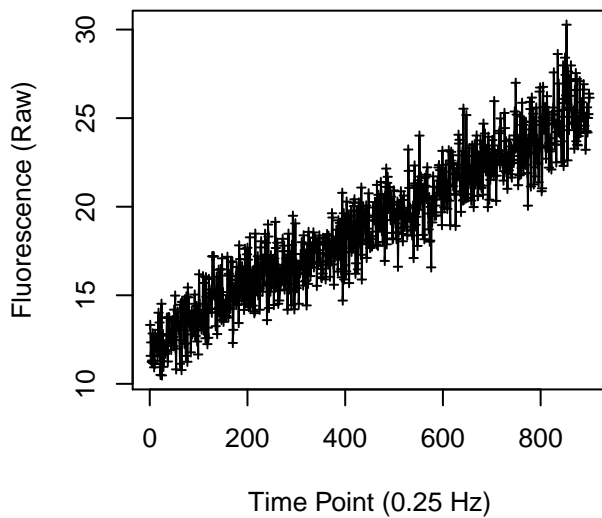

**Cell 1911**

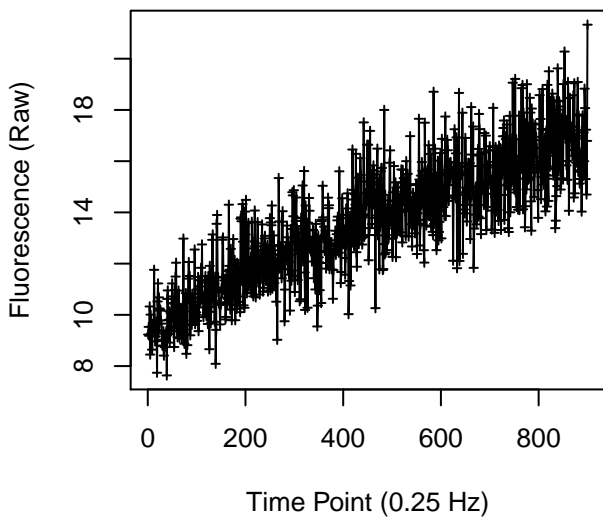

**Cell 1912**

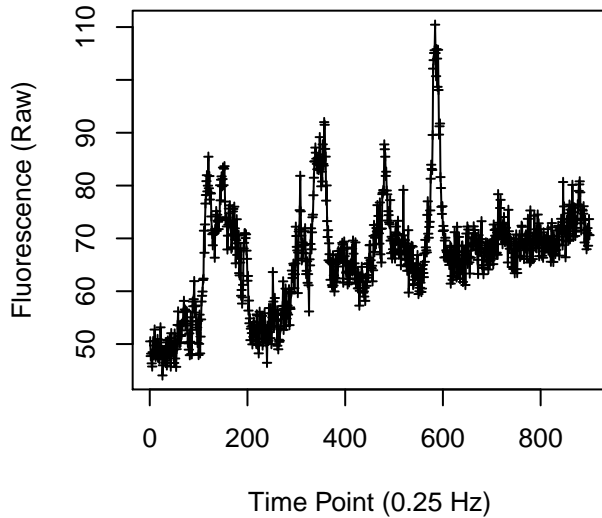

**Cell 1913**

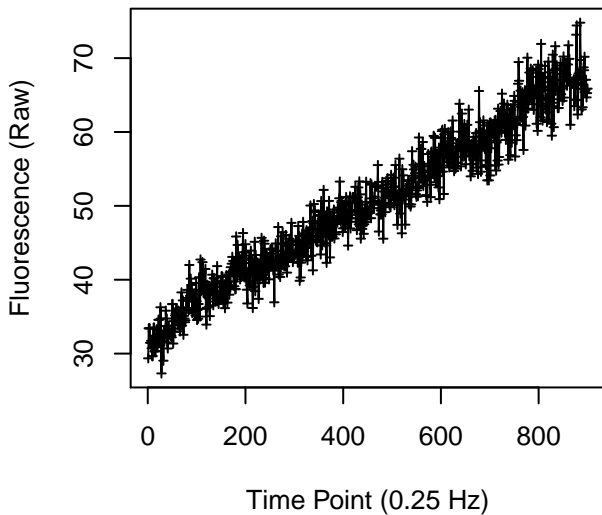

**Cell 1914**

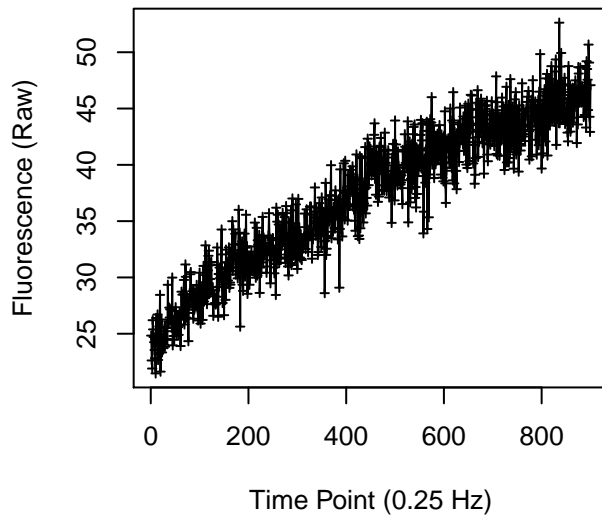

**Cell 1915**

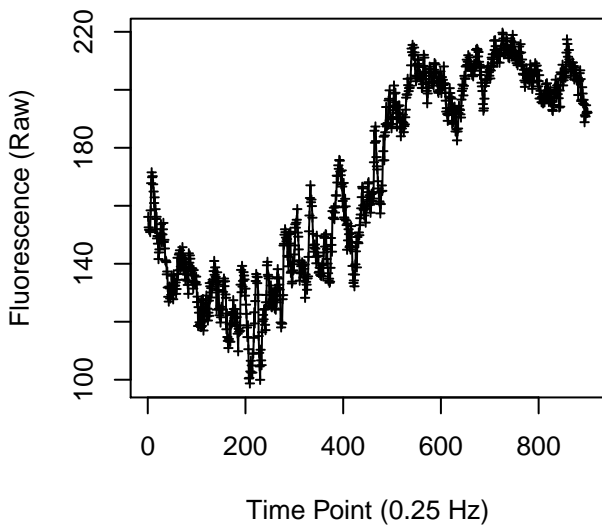

**Cell 1916**

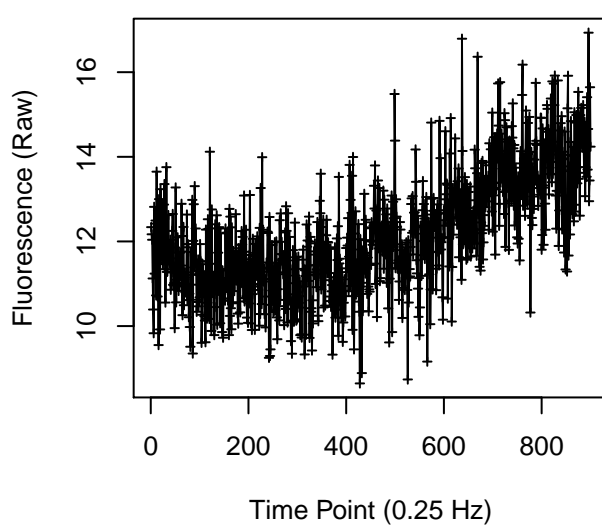

**Cell 1917**

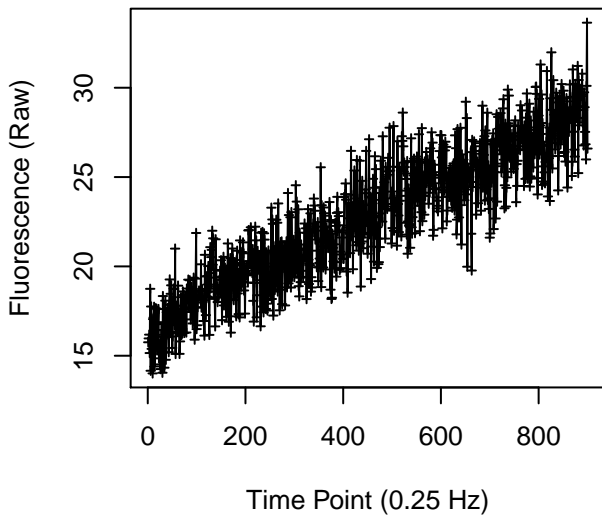

**Cell 1918**

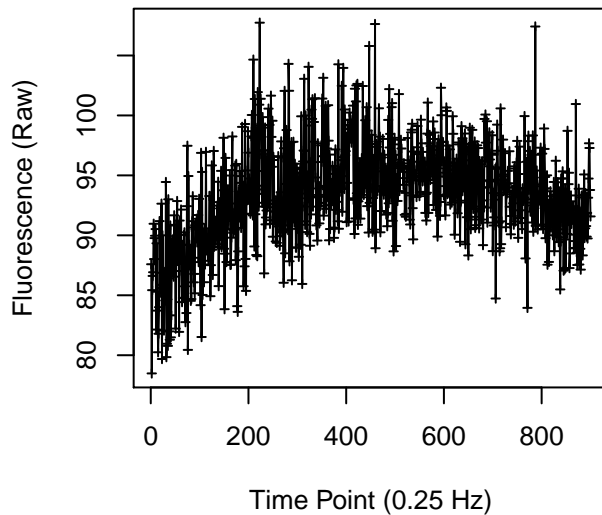

**Cell 1919**

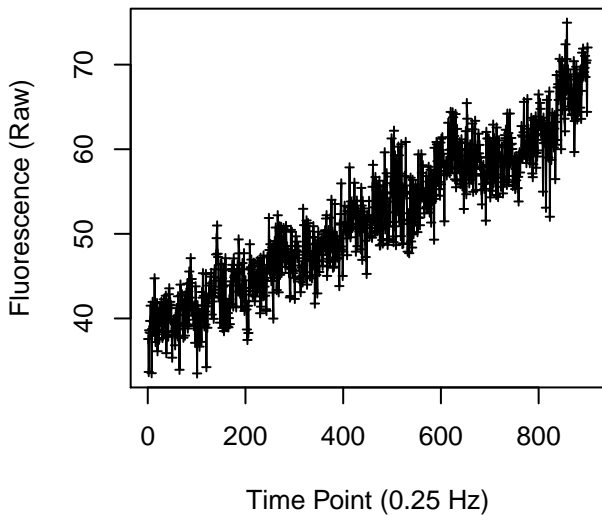

**Cell 1920**

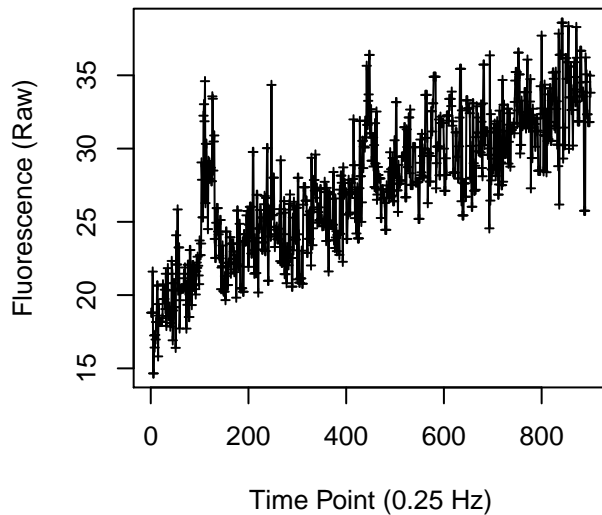

**Cell 1921**

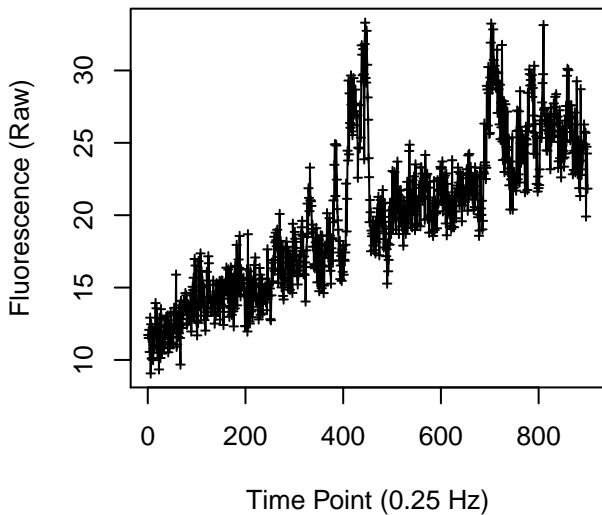

**Cell 1922**

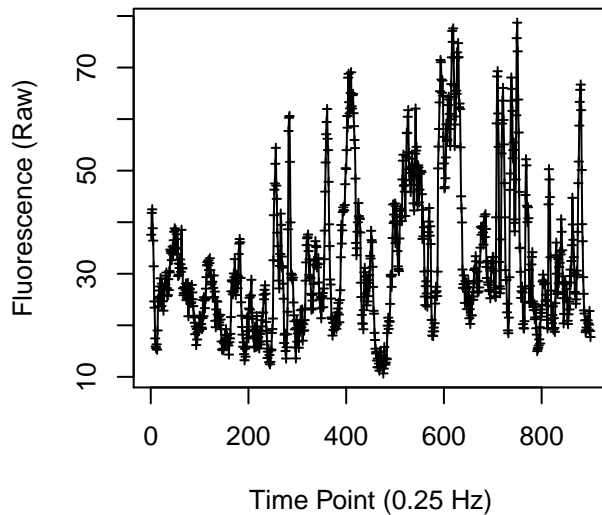

**Cell 1923**

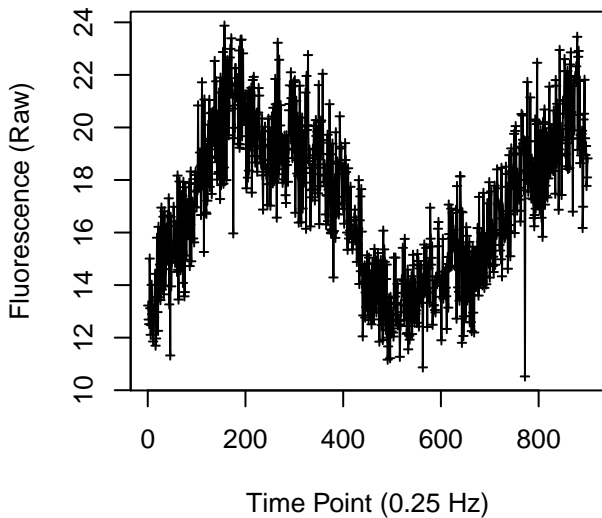

**Cell 1924**

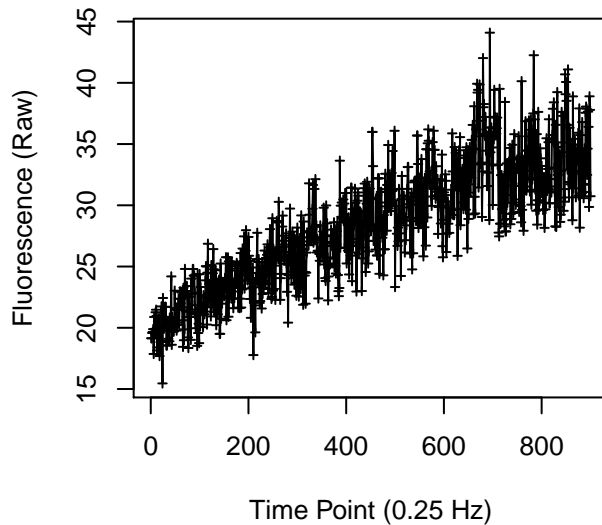

**Cell 1925**

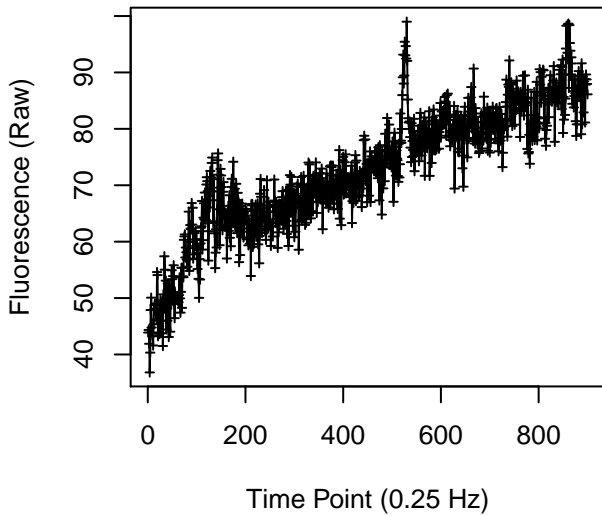

**Cell 1926**

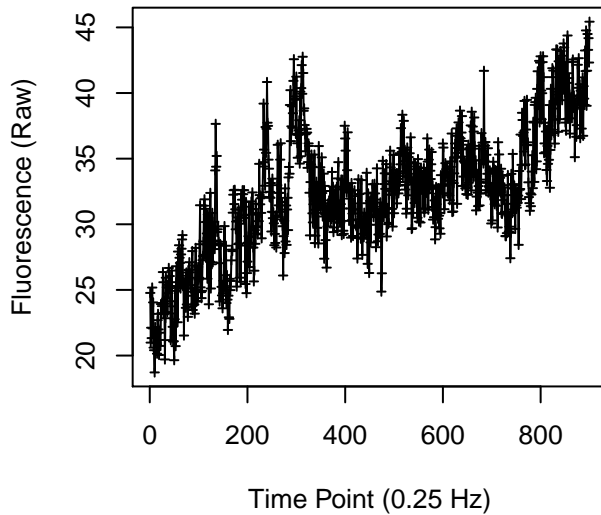

**Cell 1927**

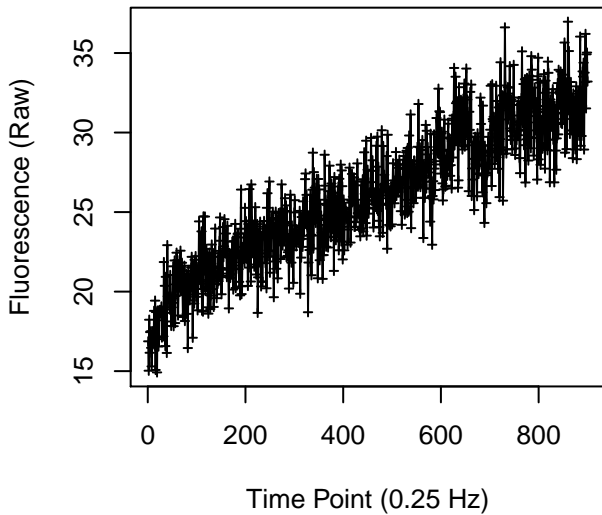

**Cell 1928**

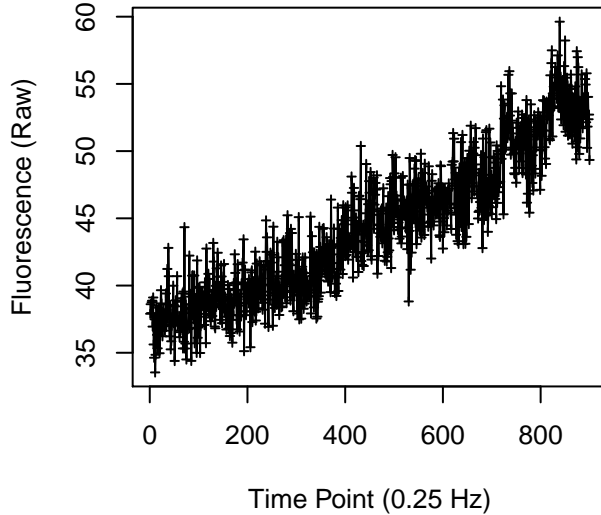



**Cell 1929**

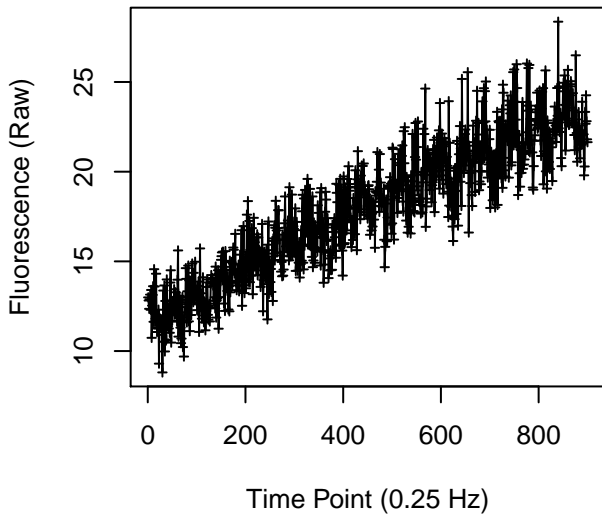

**Cell 1930**

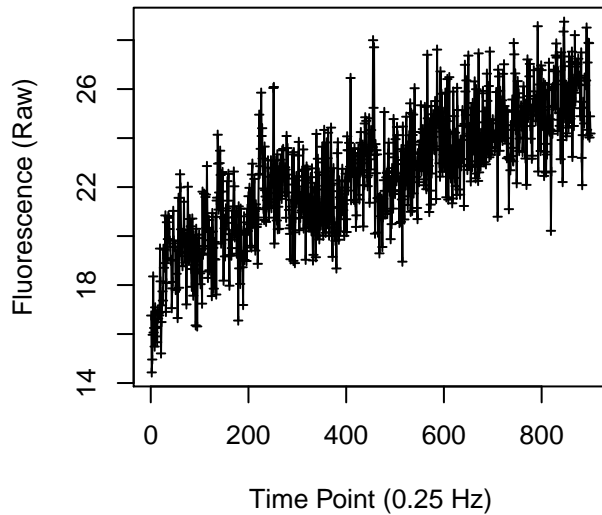

**Cell 1931**

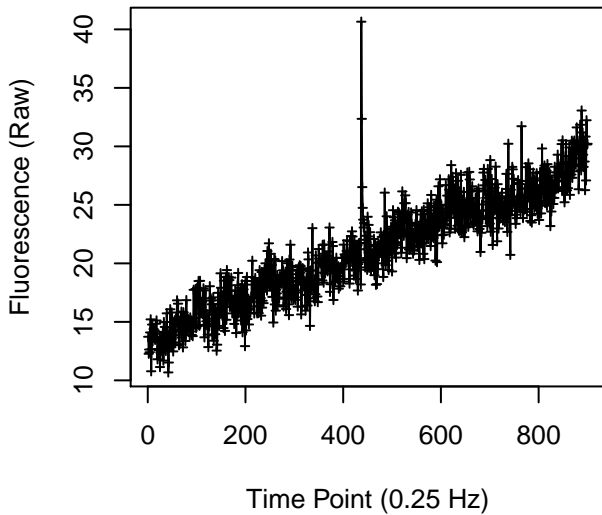

**Cell 1932**

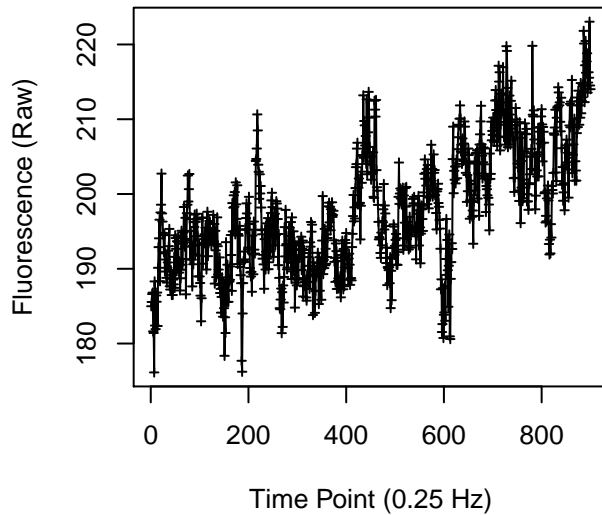

**Cell 1933**

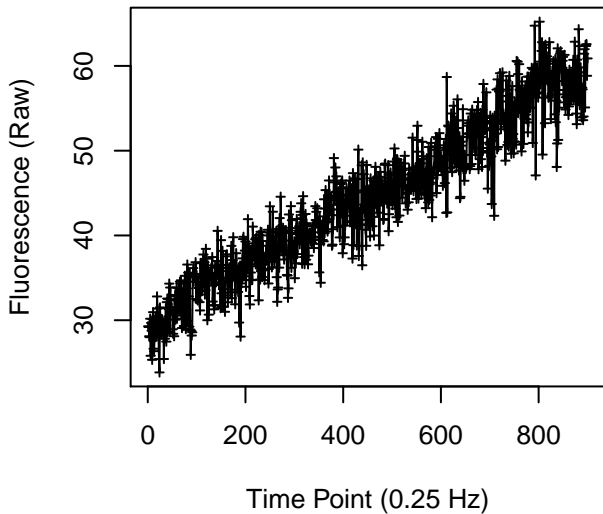

**Cell 1934**

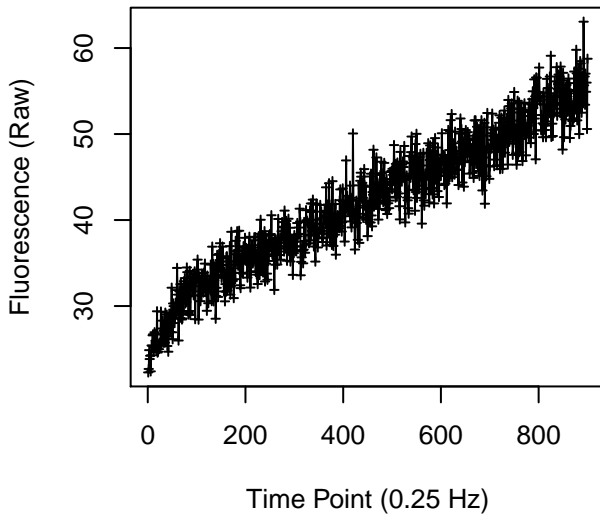

**Cell 1935**

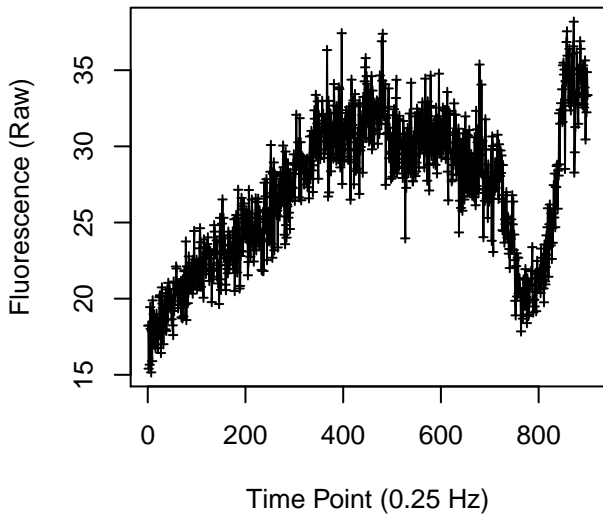

**Cell 1936**

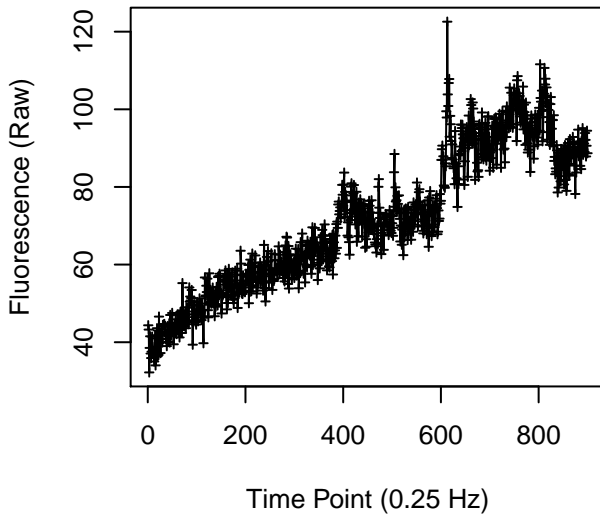

**Cell 1937**

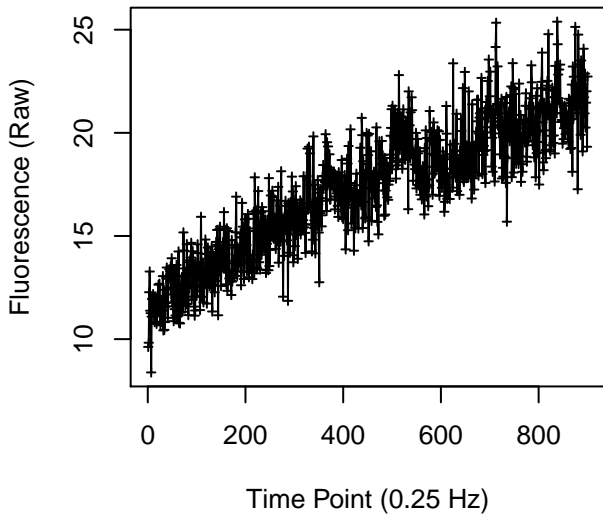

**Cell 1938**

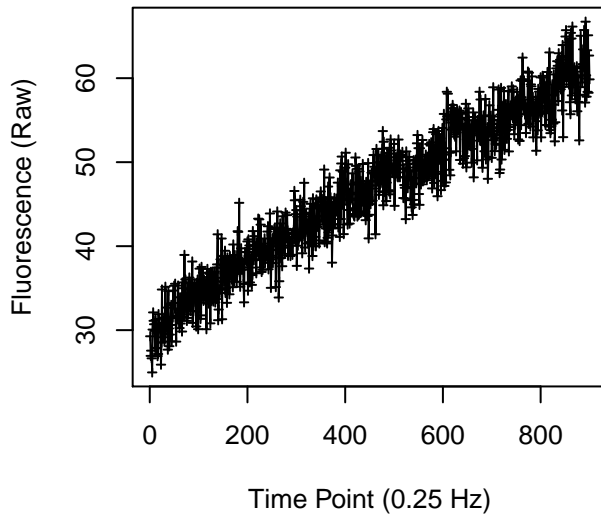

**Cell 1939**

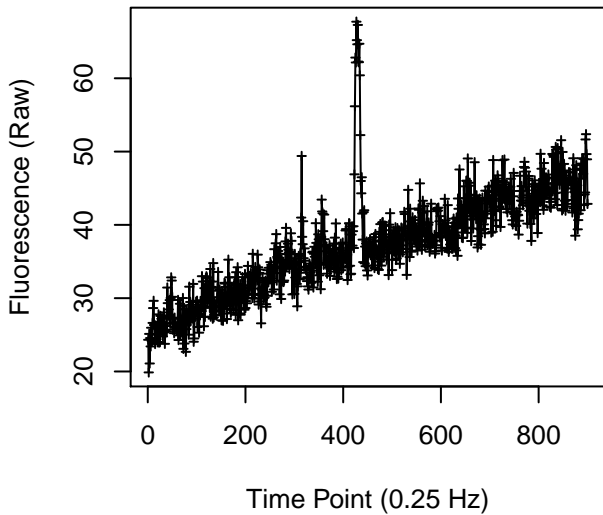

**Cell 1940**

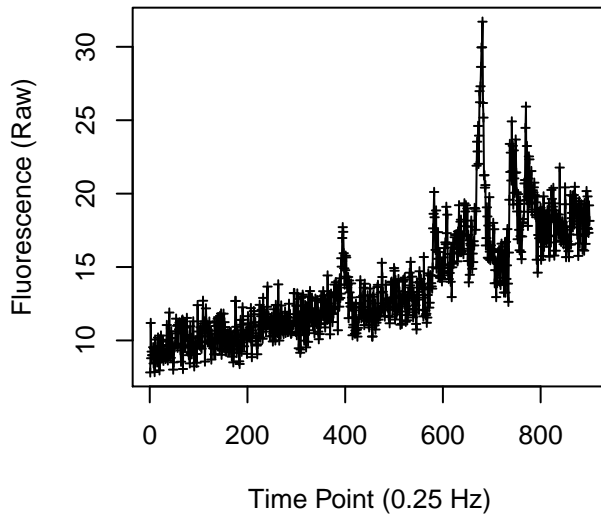

**Cell 1941**

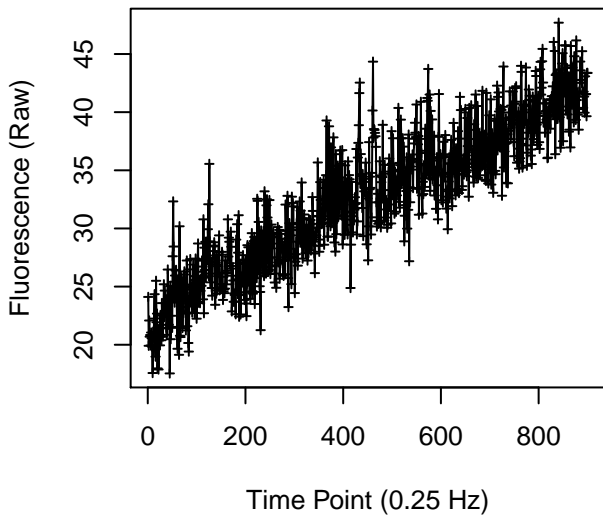

**Cell 1942**

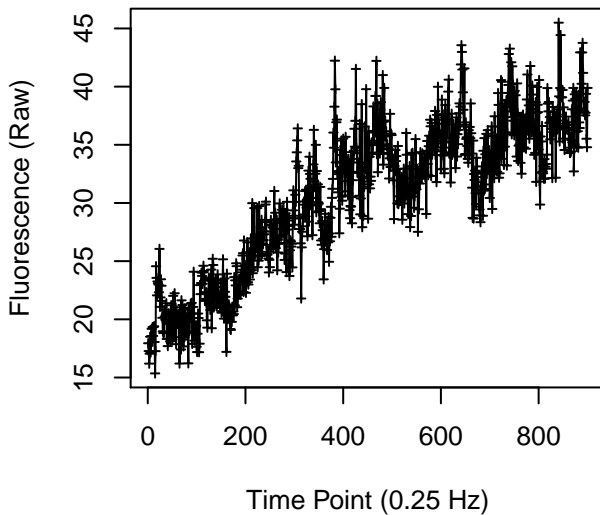

**Cell 1943**

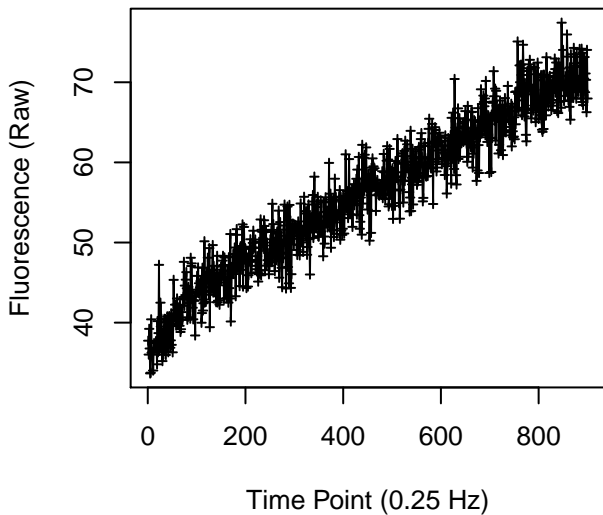

**Cell 1944**

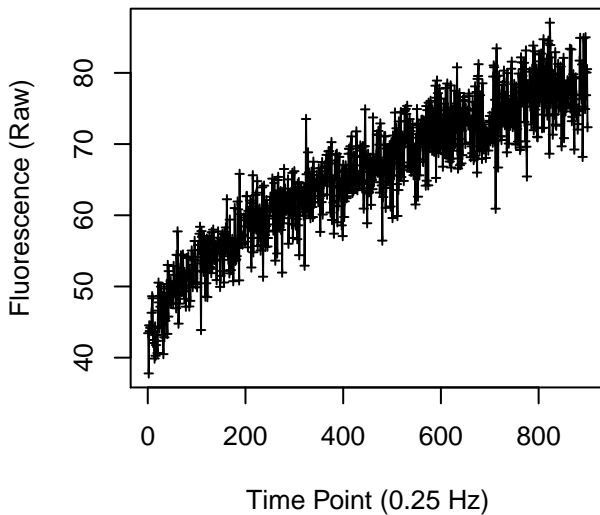

**Cell 1945**

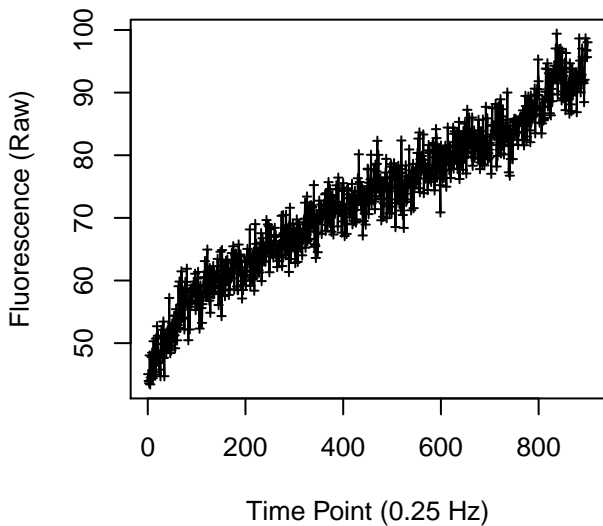

**Cell 1946**

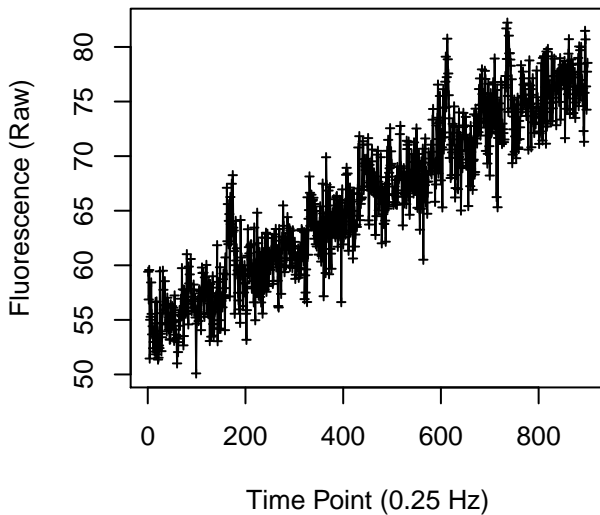

**Cell 1947**

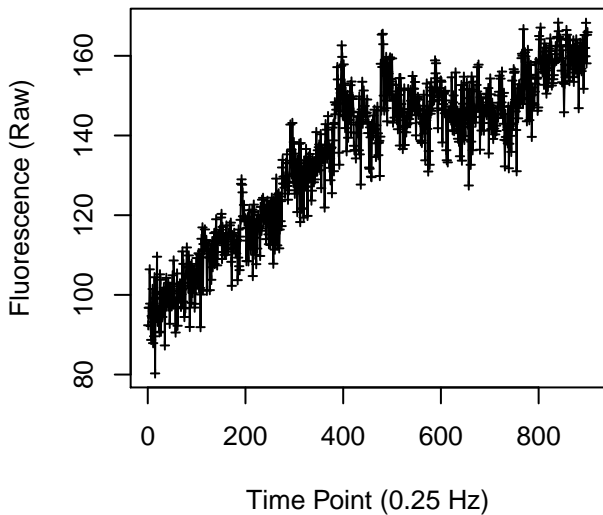

**Cell 1948**

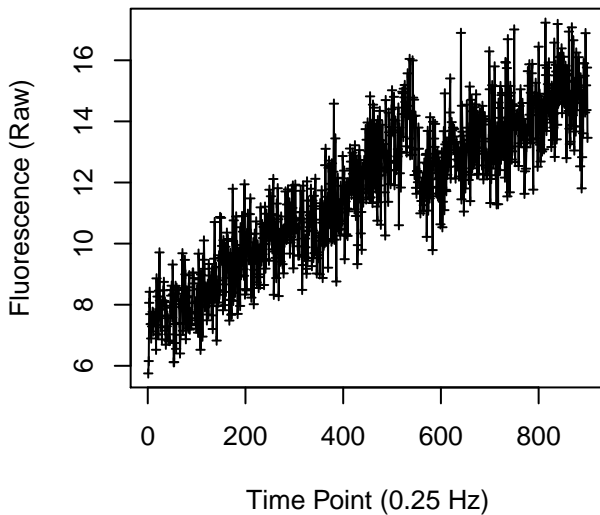

**Cell 1949**

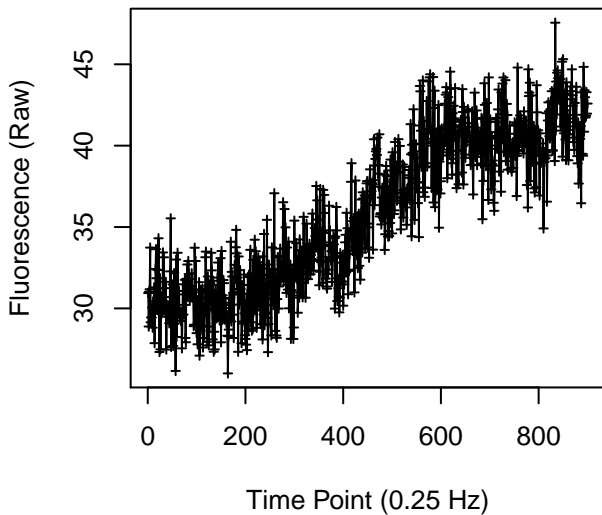

**Cell 1950**

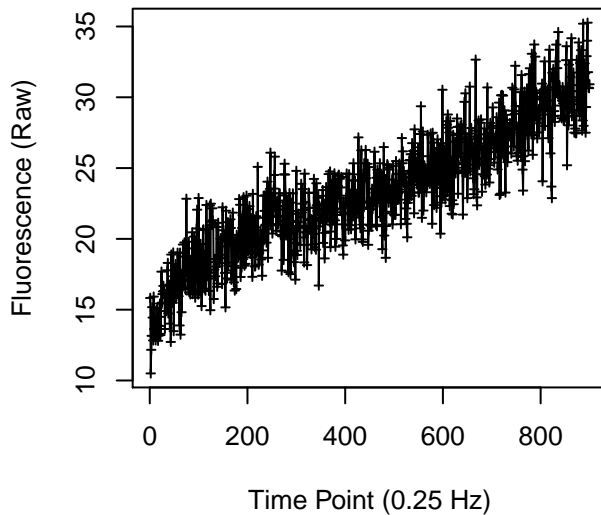

**Cell 1951**

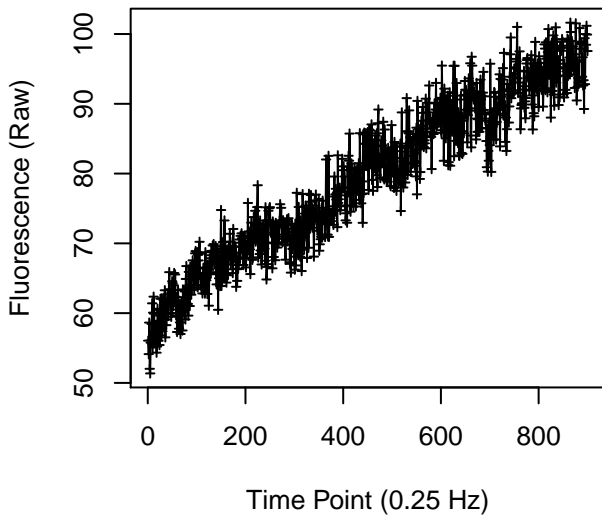

**Cell 1952**

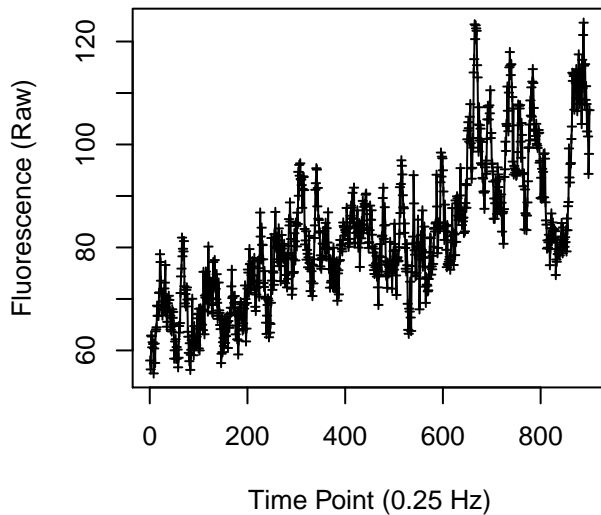

**Cell 1953**

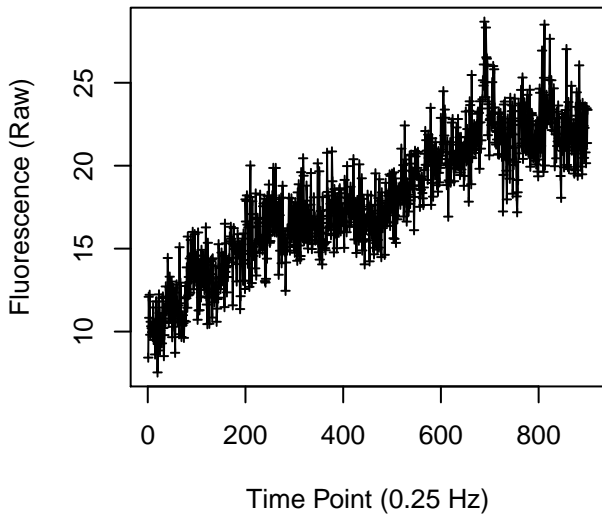

**Cell 1954**

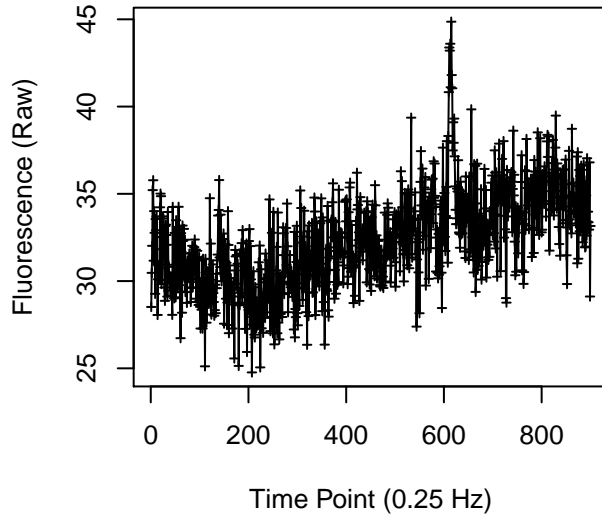

**Cell 1955**

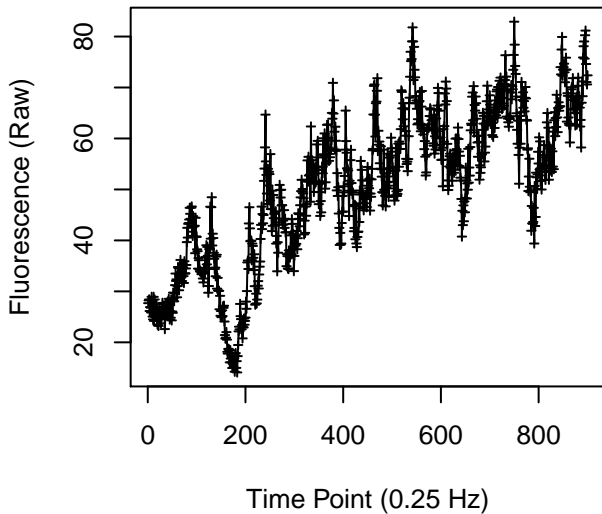

**Cell 1956**

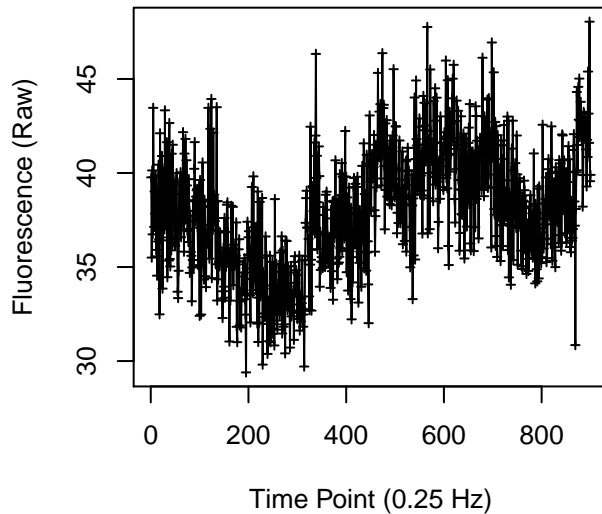

**Cell 1957**

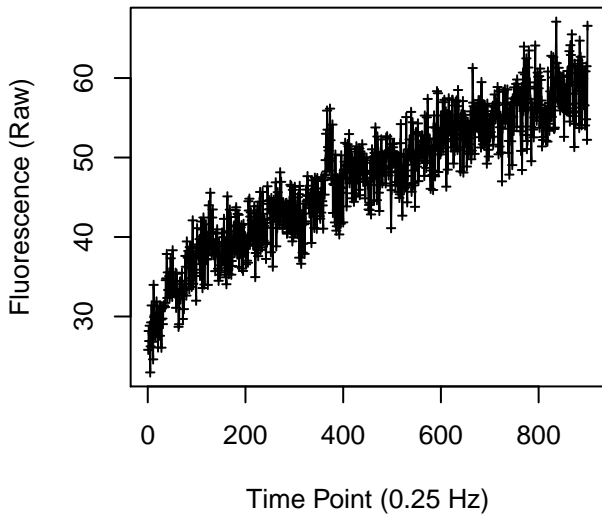

**Cell 1958**

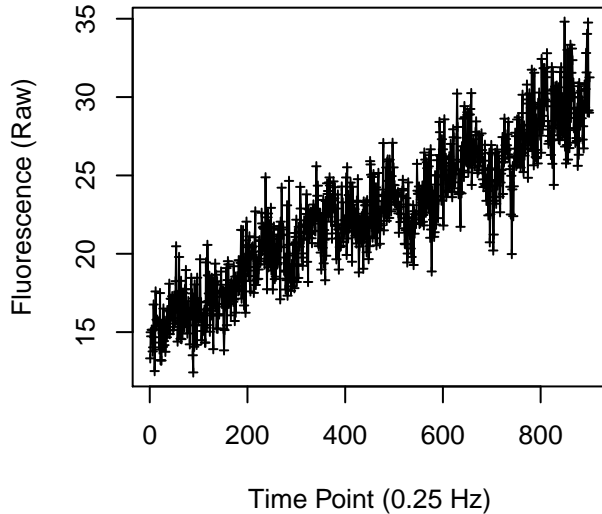

**Cell 1959**

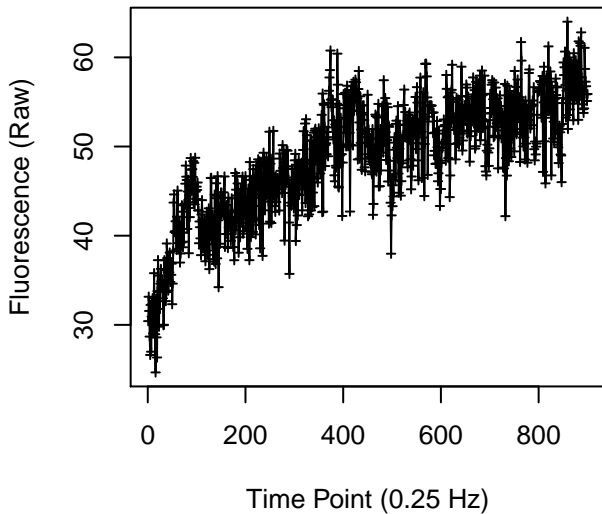

**Cell 1960**

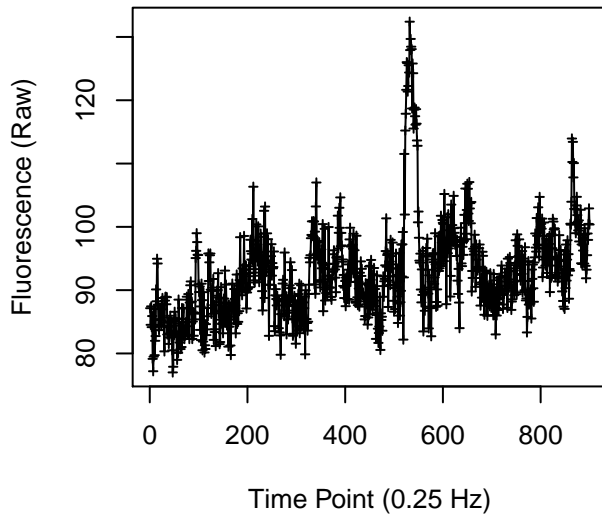



**Cell 1961**

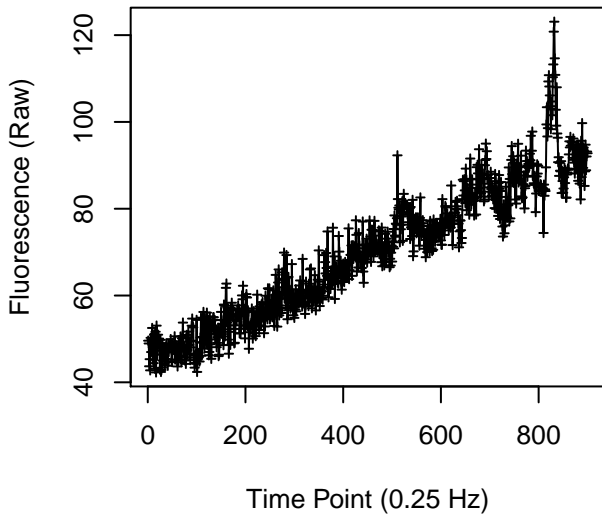

**Cell 1962**

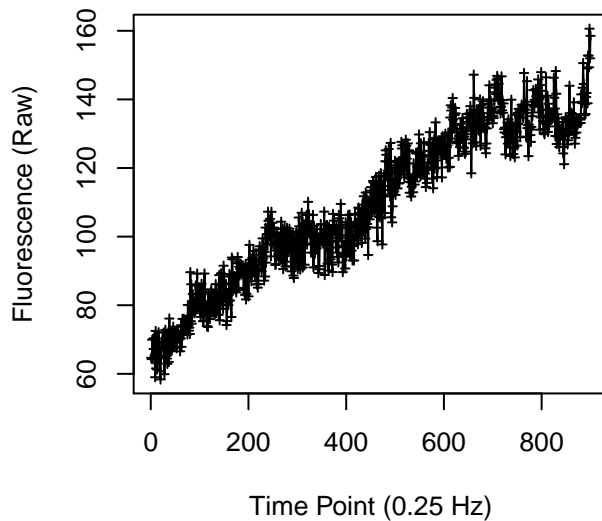

**Cell 1963**

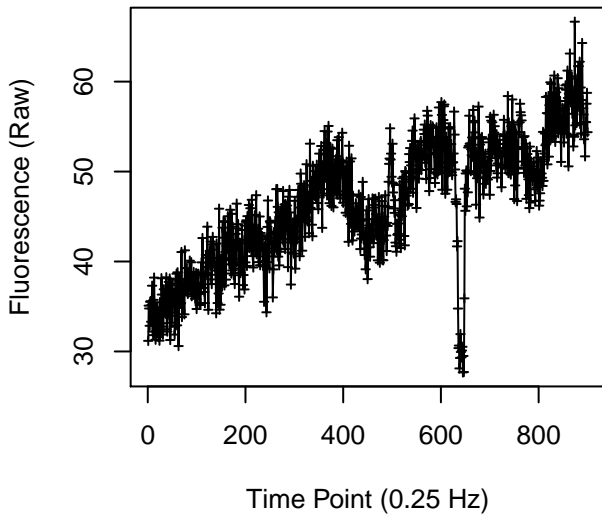

**Cell 1964**

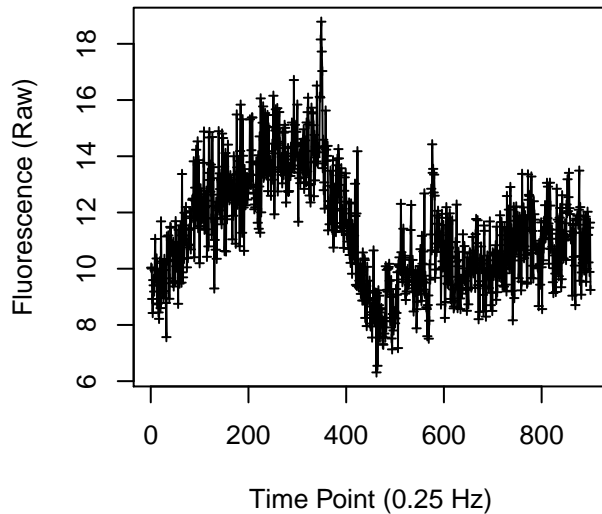

**Cell 1965**

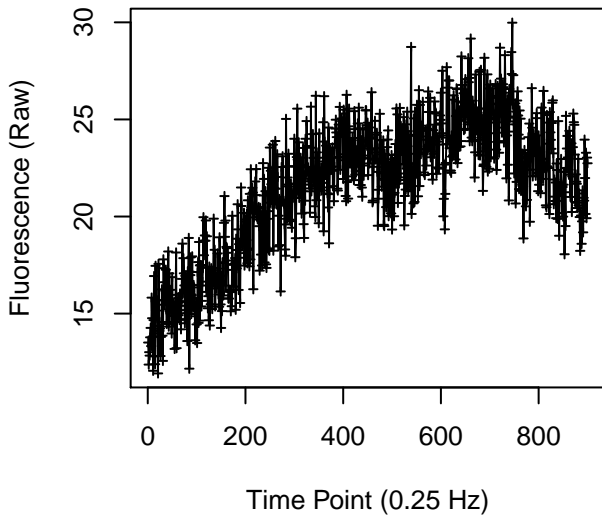

**Cell 1966**

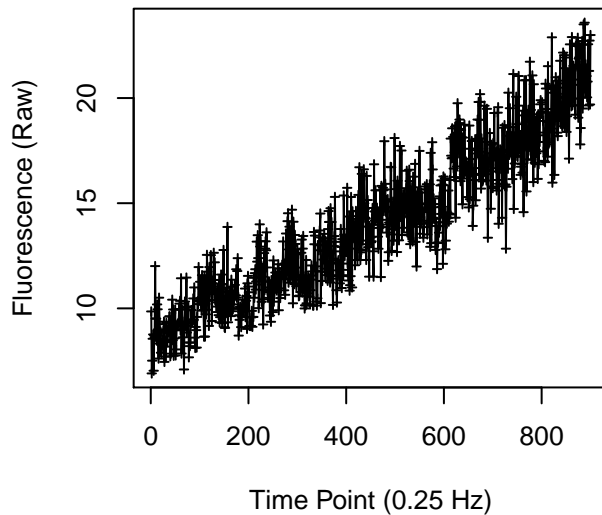

**Cell 1967**

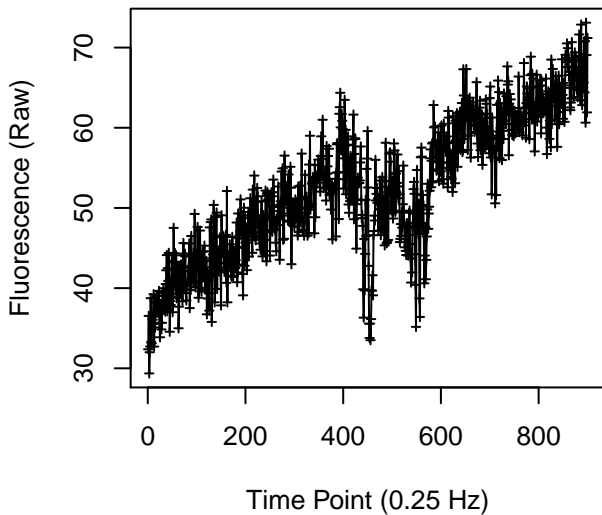

**Cell 1968**

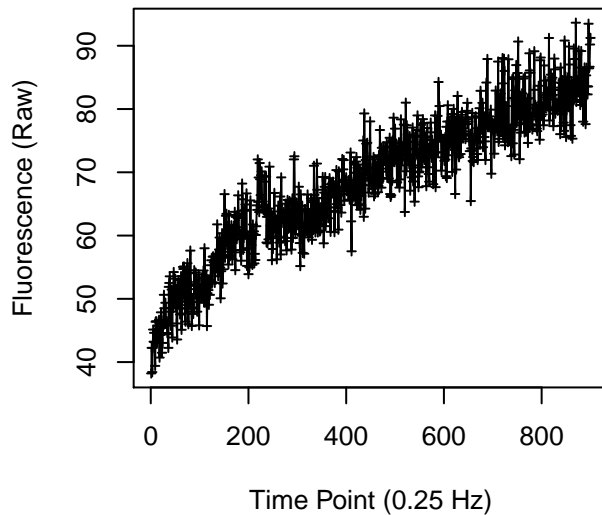

**Cell 1969**

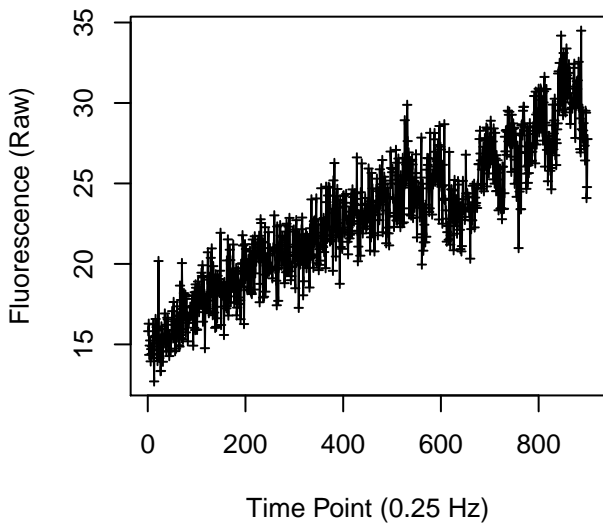

**Cell 1970**

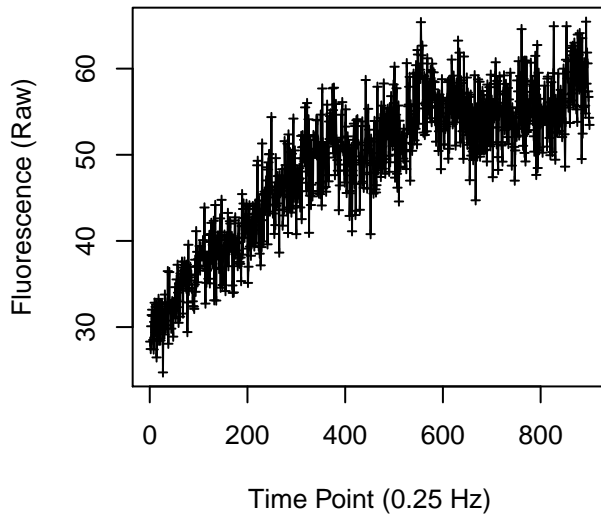

**Cell 1971**

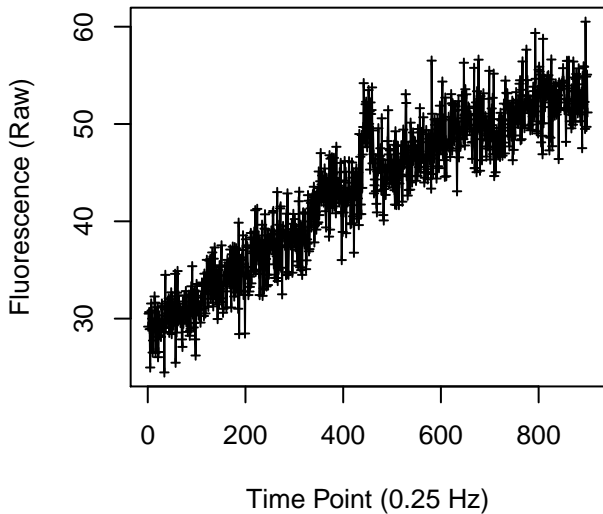

**Cell 1972**

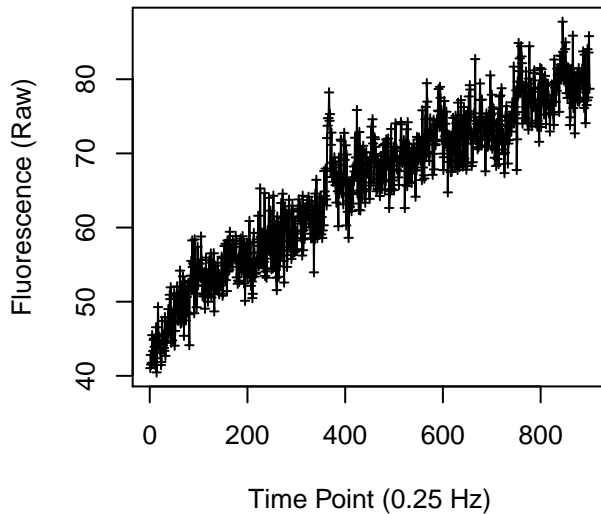

**Cell 1973**

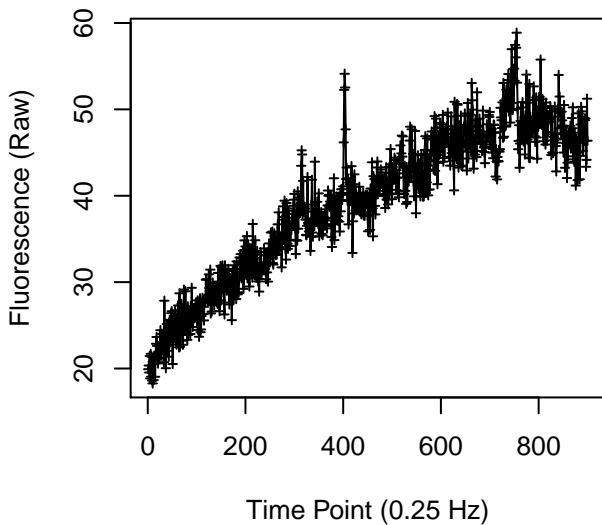

**Cell 1974**

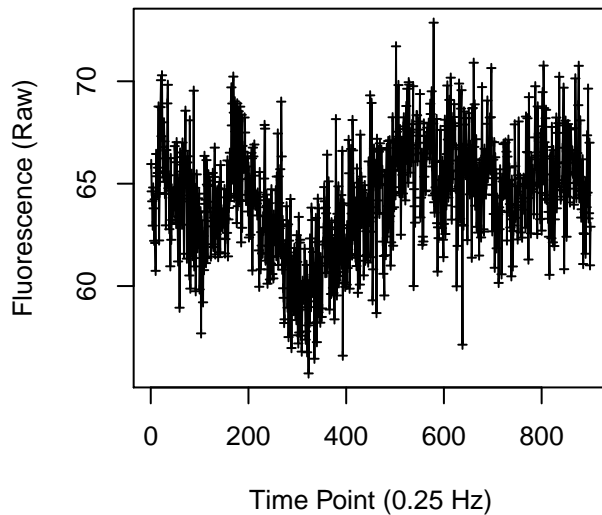

**Cell 1975**

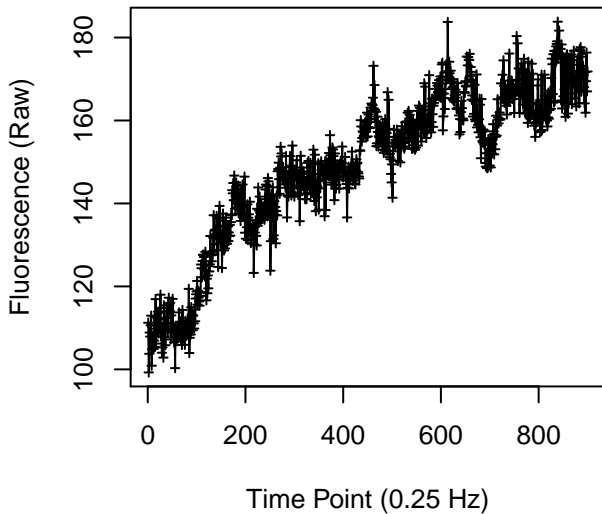

**Cell 1976**

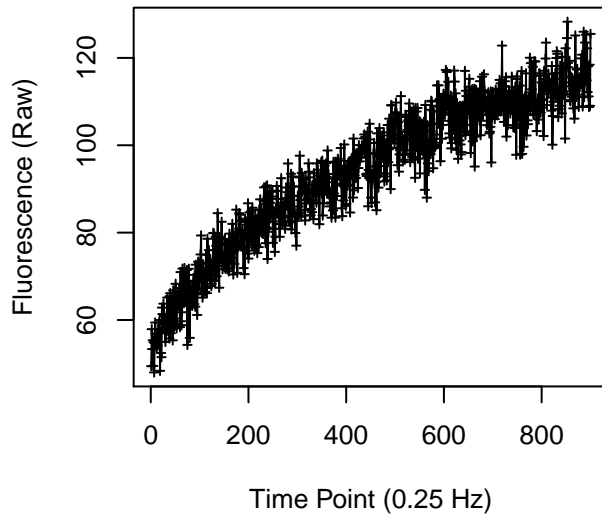

**Cell 1977**

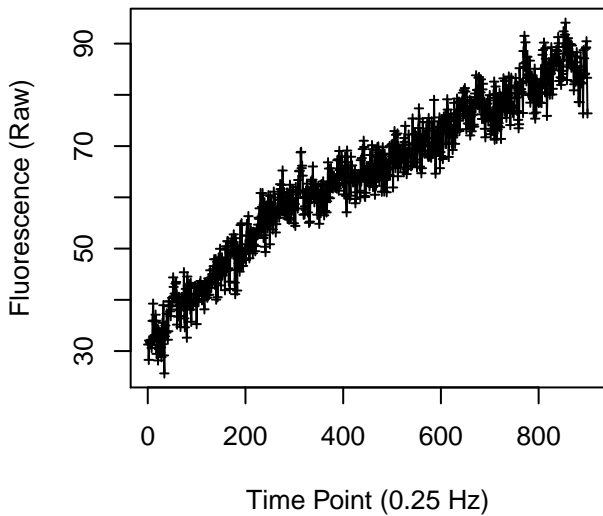

**Cell 1978**

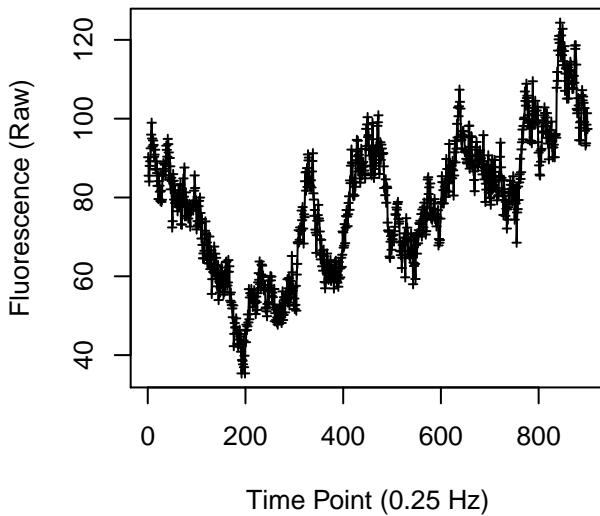

**Cell 1979**

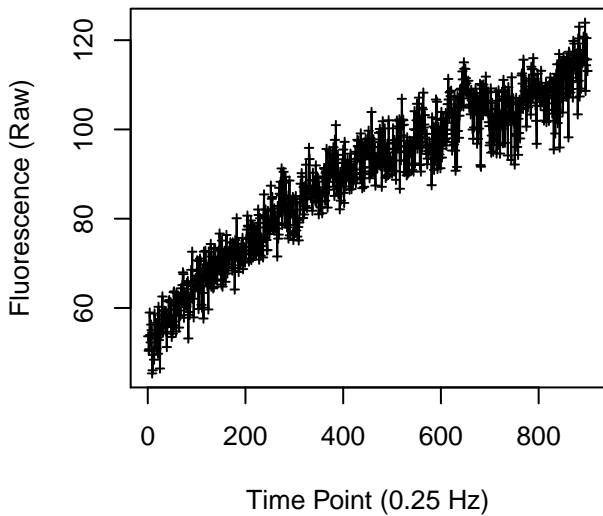

**Cell 1980**

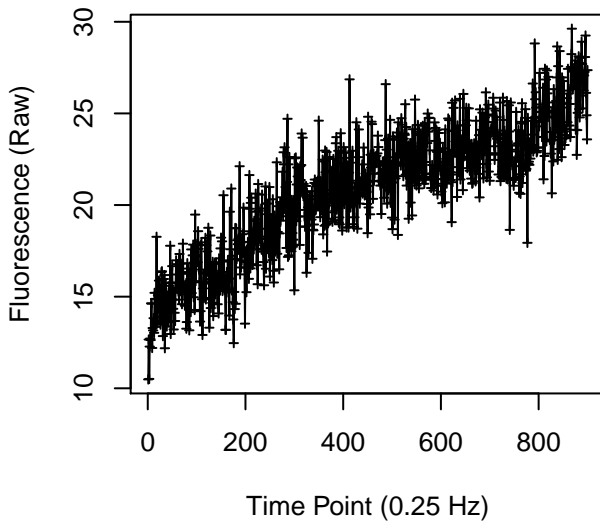

**Cell 1981**

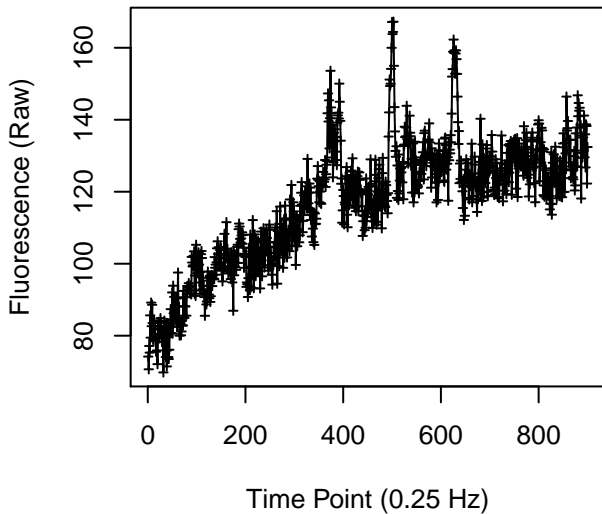

**Cell 1982**

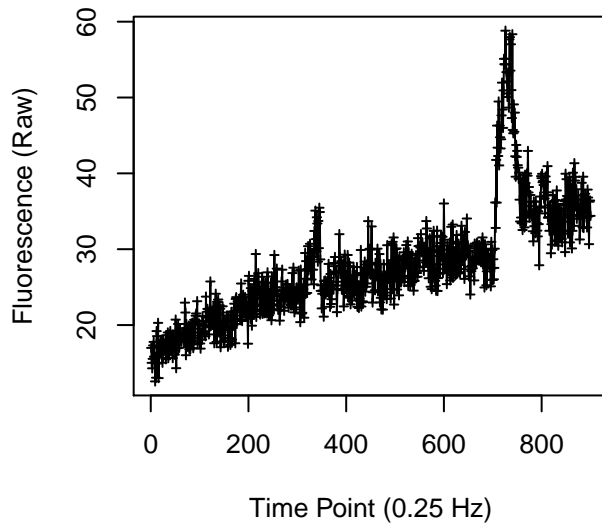

**Cell 1983**

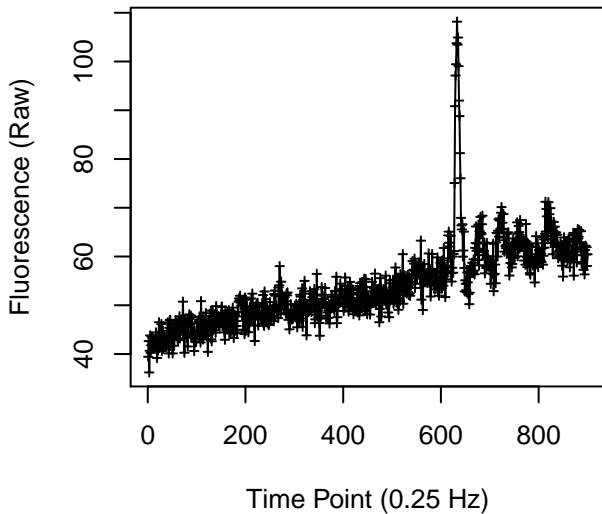

**Cell 1984**

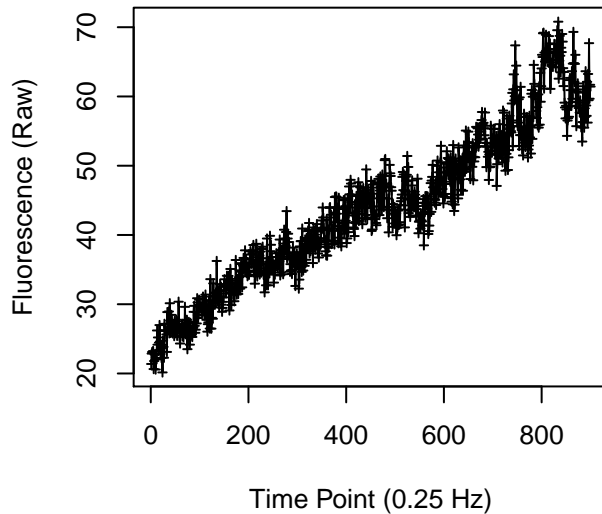

**Cell 1985**

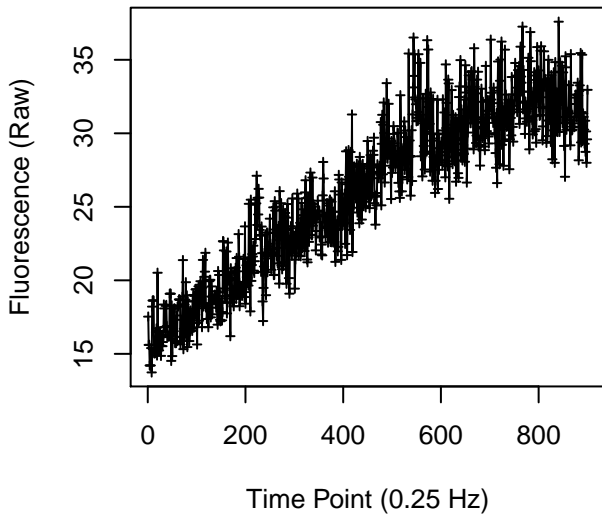

**Cell 1986**

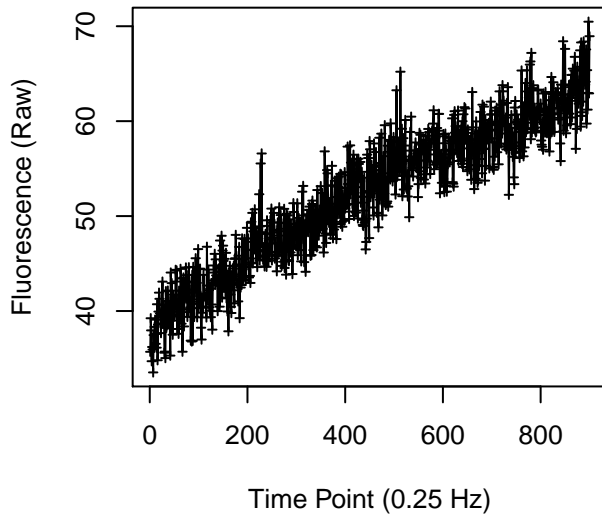

**Cell 1987**

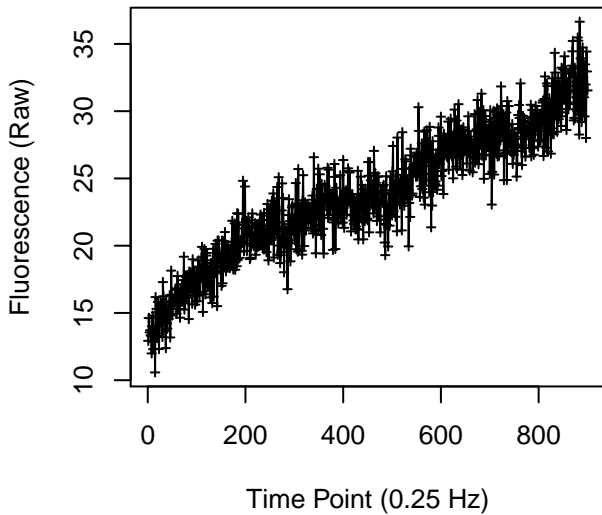

**Cell 1988**

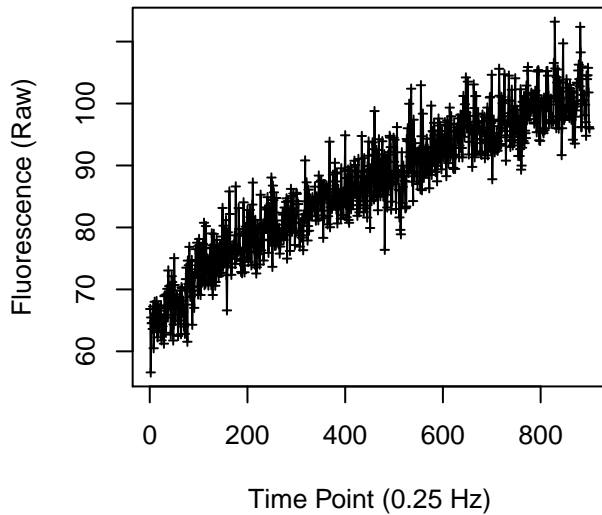

**Cell 1989**

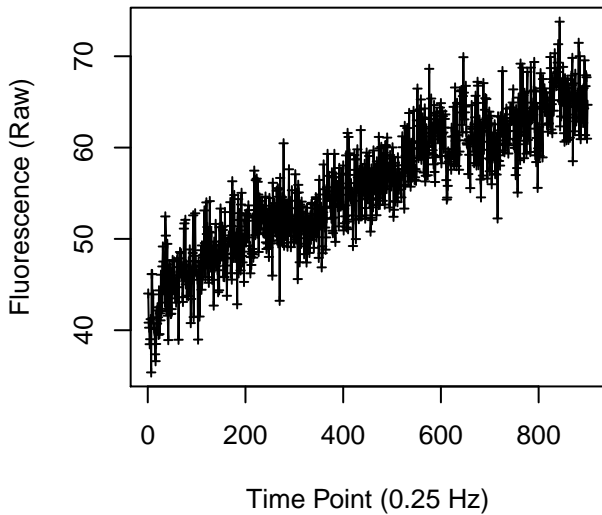

**Cell 1990**

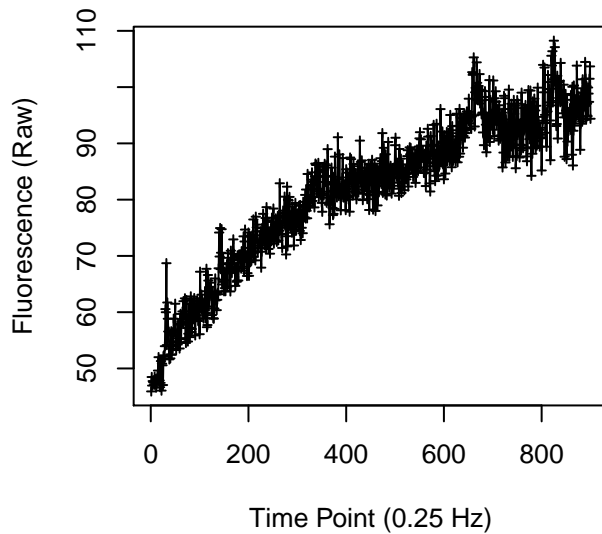

**Cell 1991**

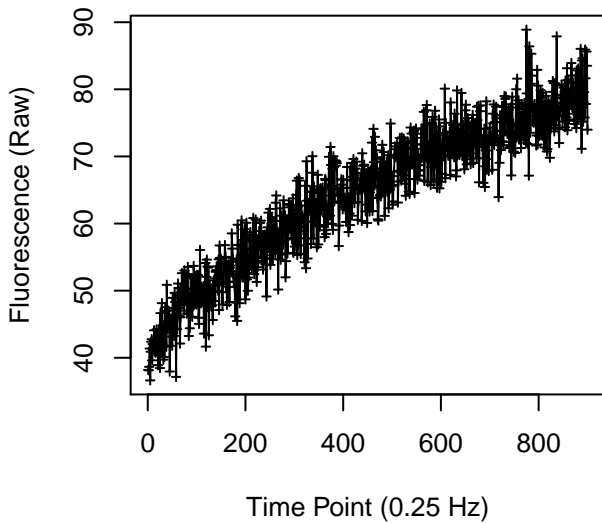

**Cell 1992**

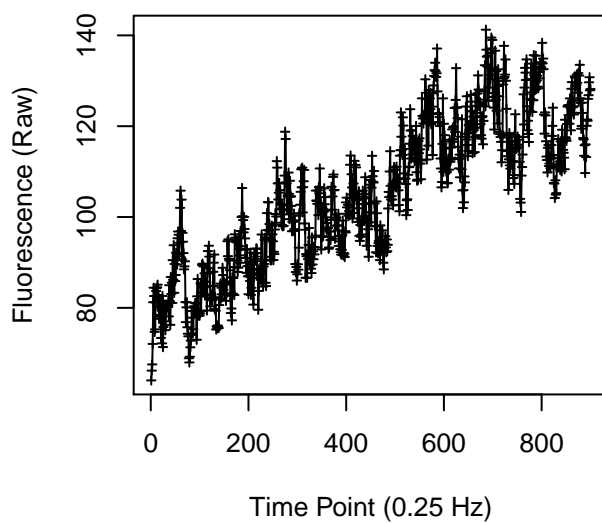



**Cell 1993**

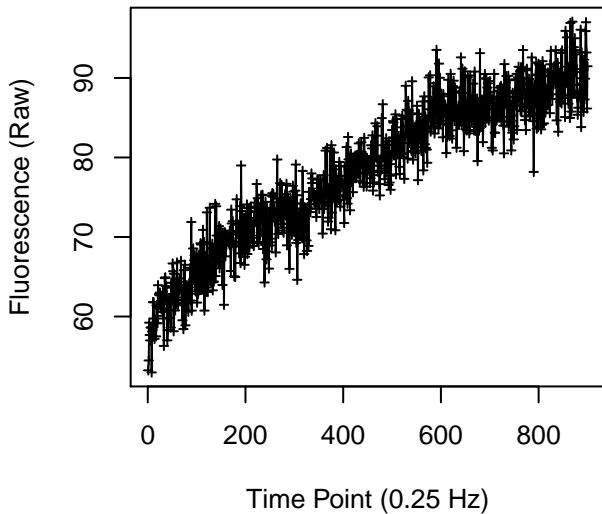

**Cell 1994**

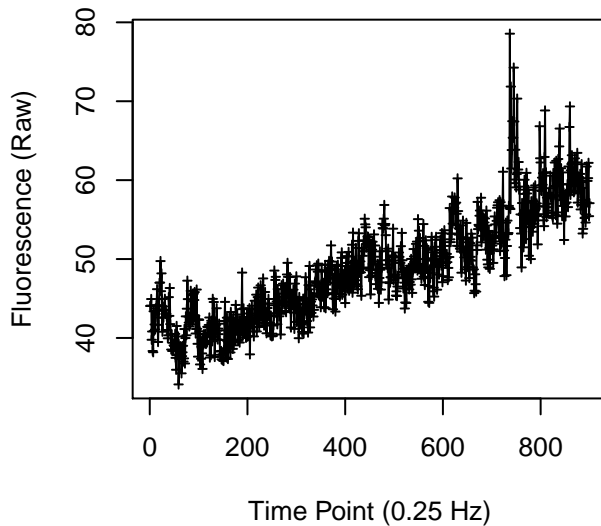

**Cell 1995**

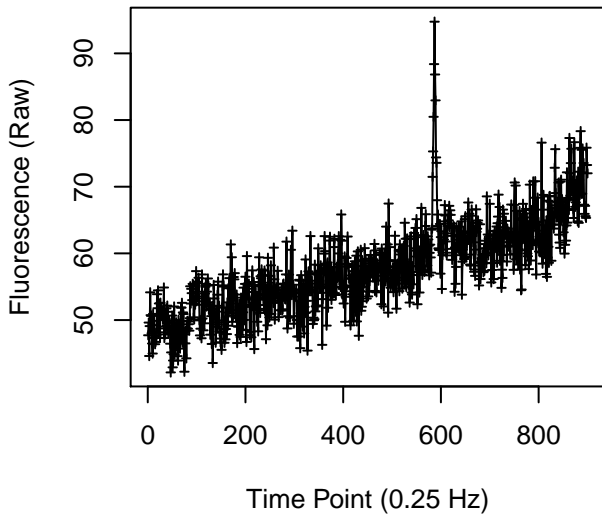

**Cell 1996**

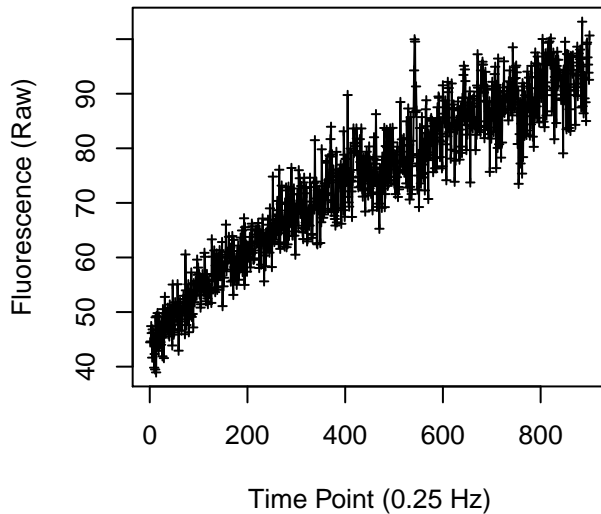

**Cell 1997**

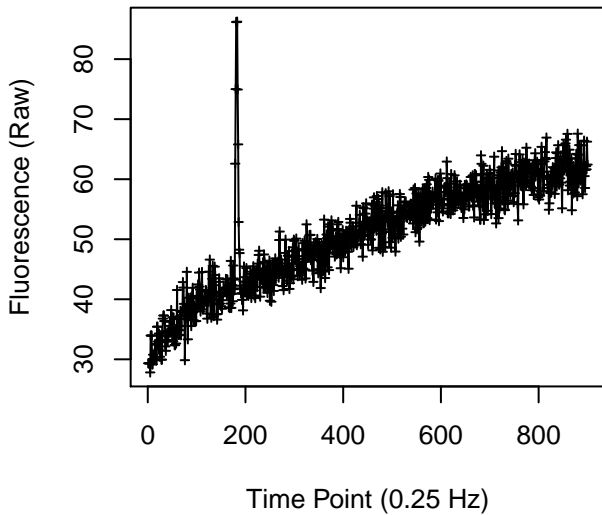

**Cell 1998**

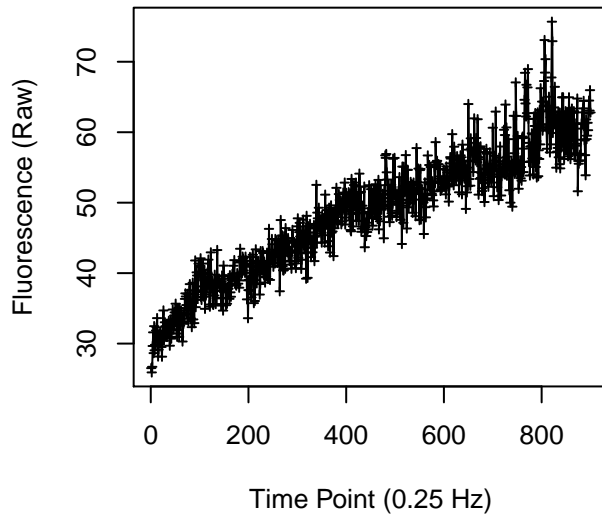

**Cell 1999**

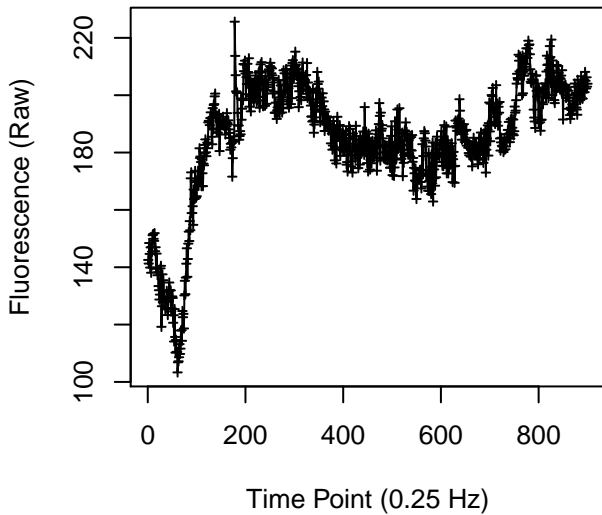

**Cell 2000**

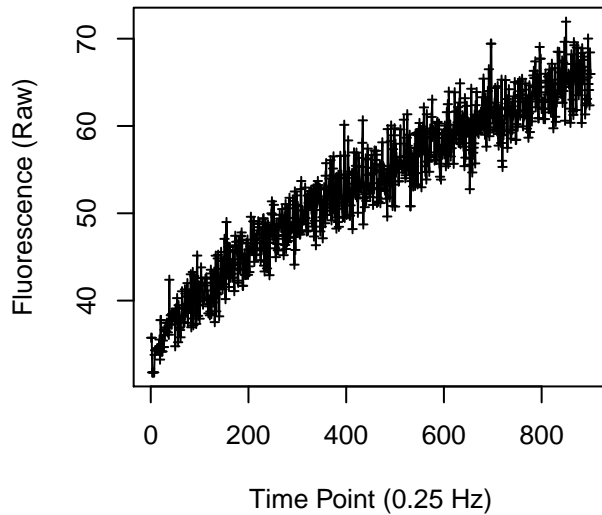

**Cell 2001**

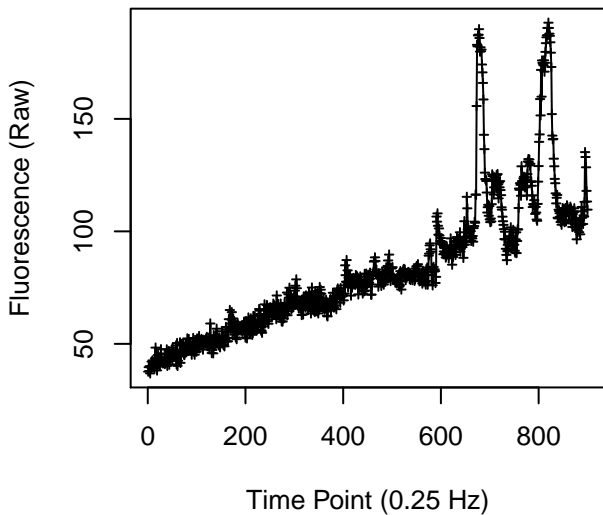

**Cell 2002**

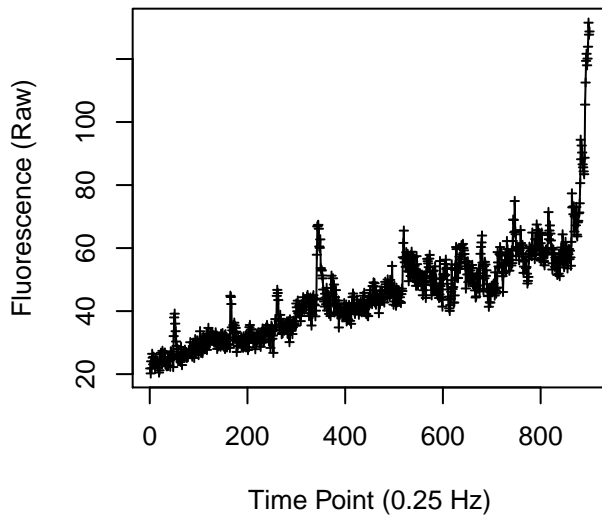

**Cell 2003**

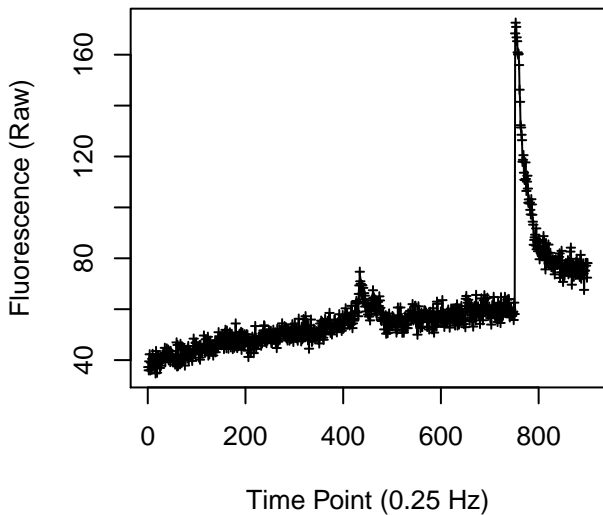

**Cell 2004**

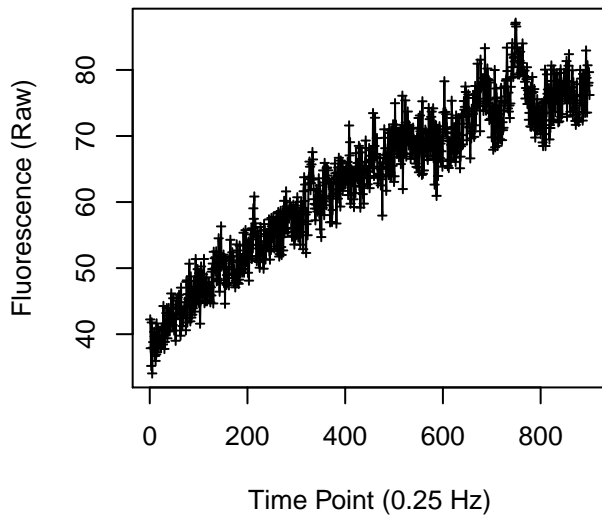

**Cell 2005**

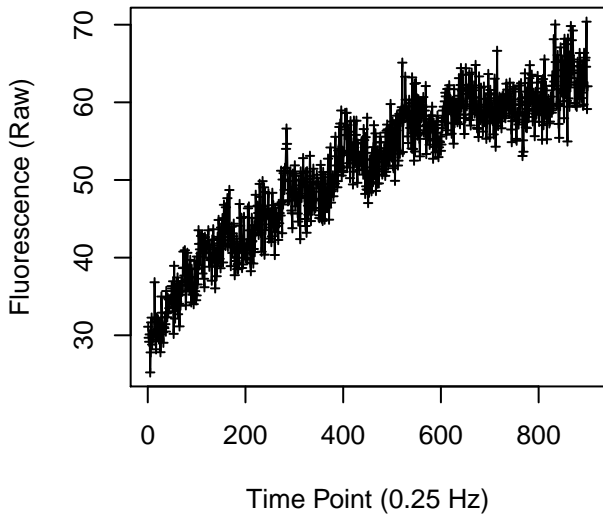

**Cell 2006**

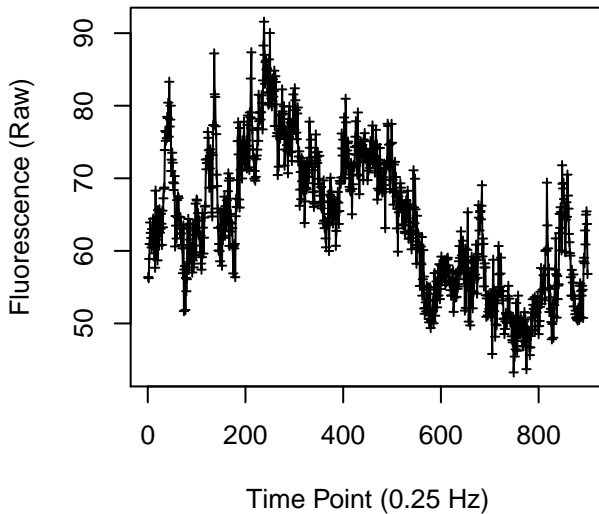

**Cell 2007**

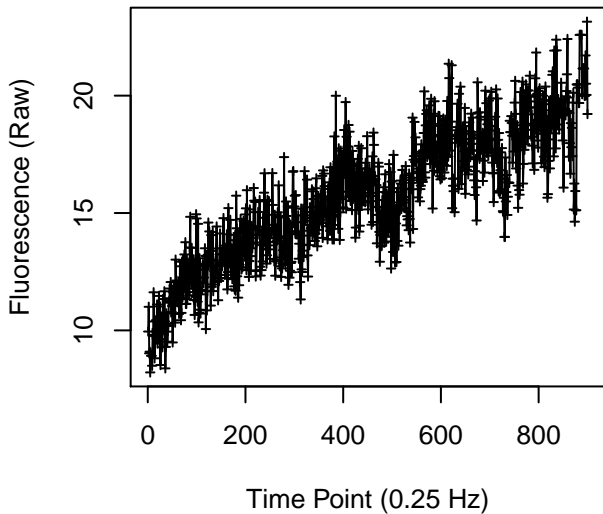

**Cell 2008**

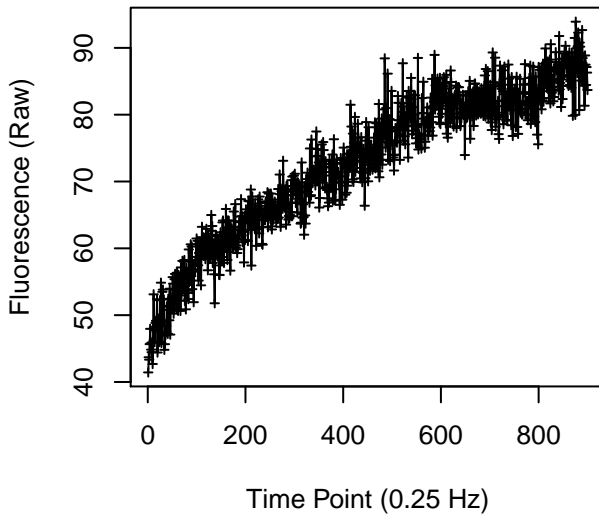

**Cell 2009**

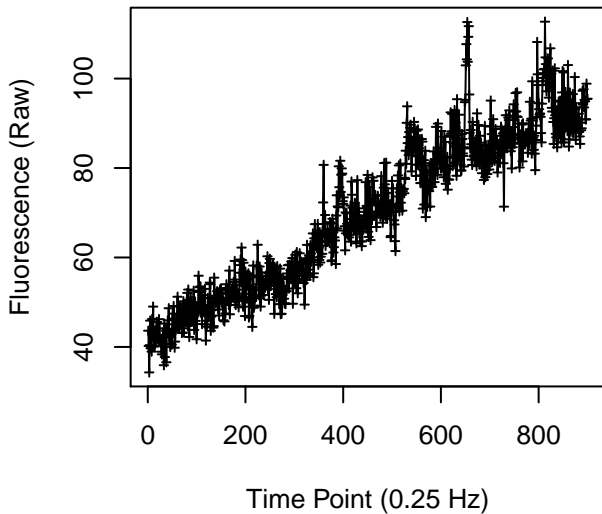

**Cell 2010**

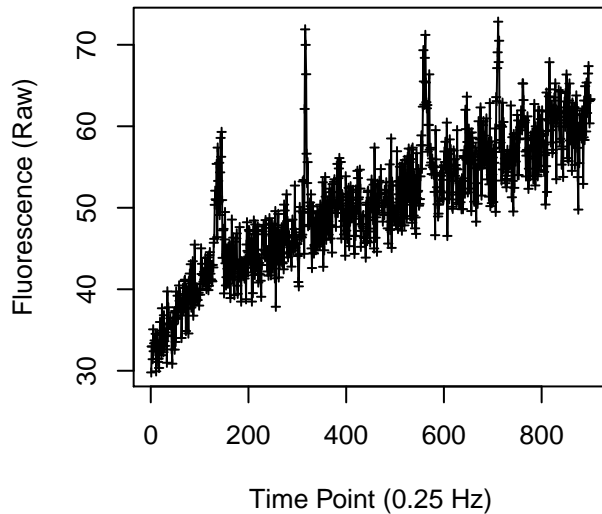

**Cell 2011**

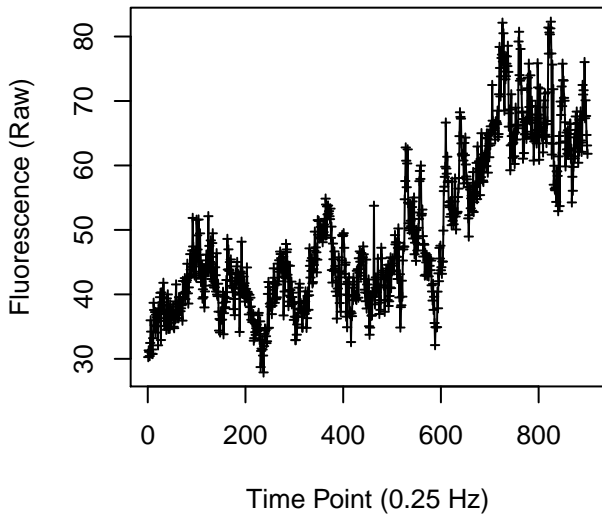

**Cell 2012**

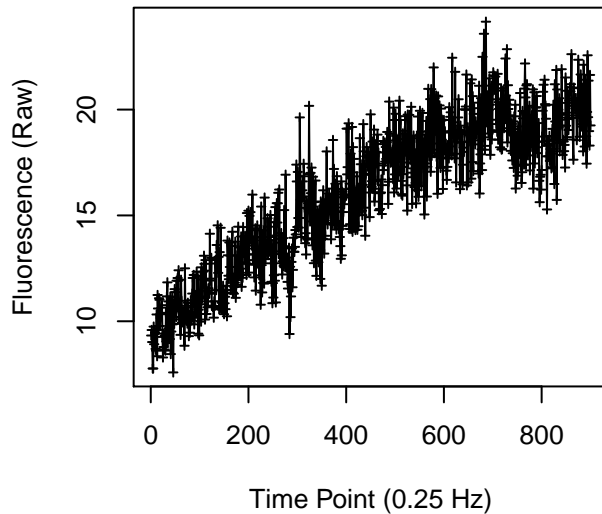

**Cell 2013**

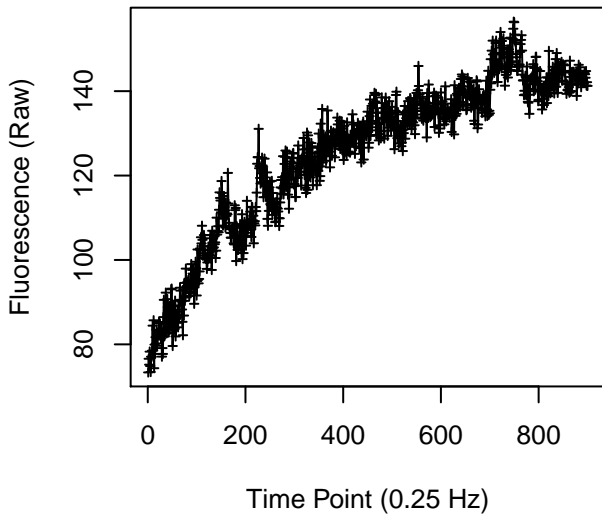

**Cell 2014**

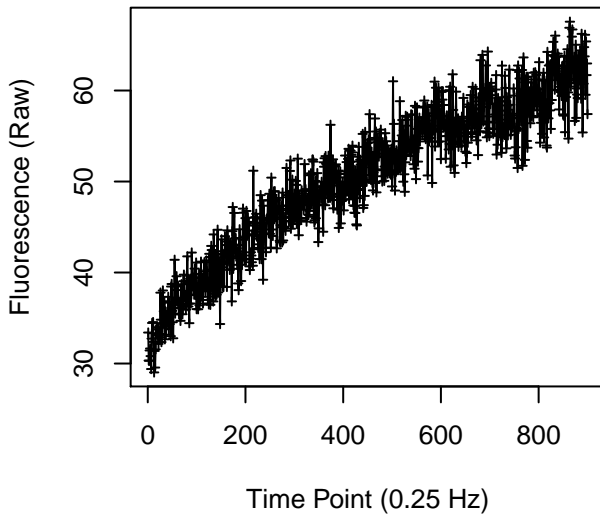

**Cell 2015**

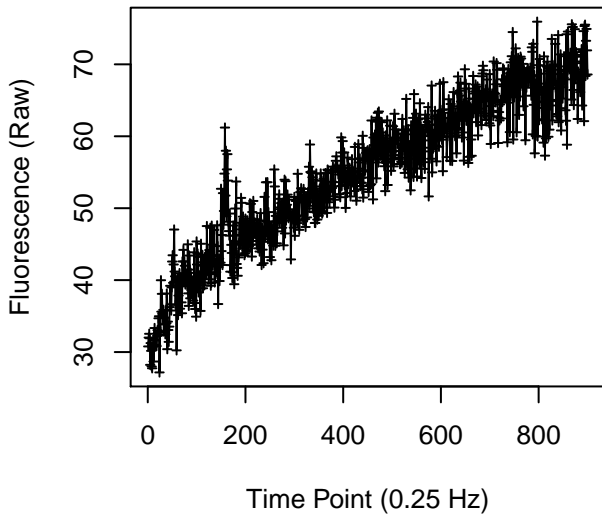

**Cell 2016**

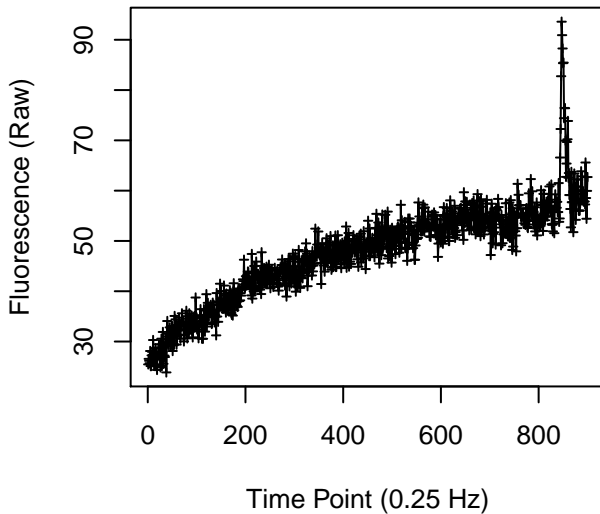

**Cell 2017**

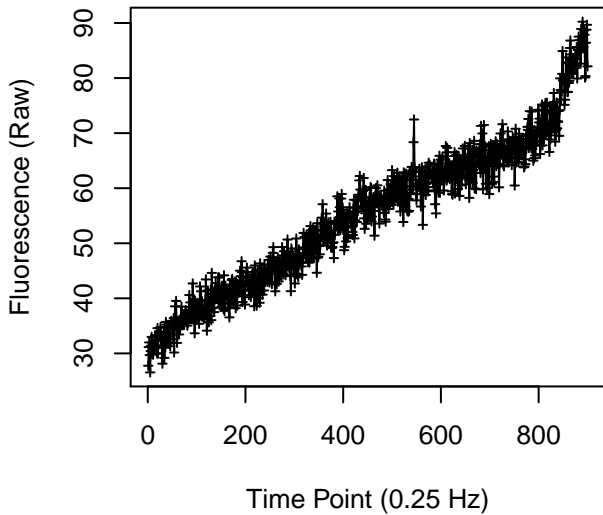

**Cell 2018**

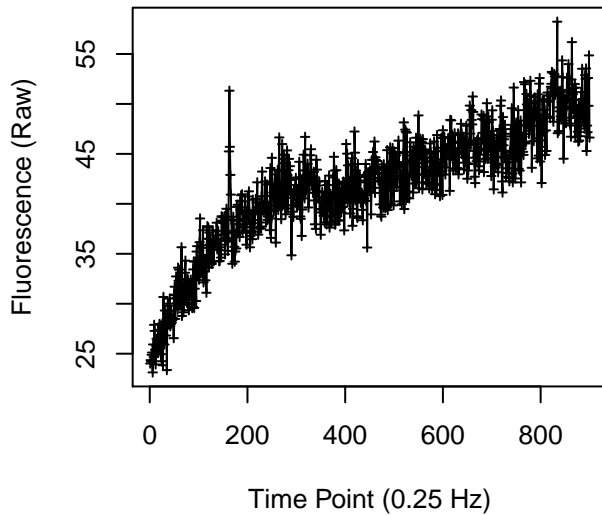

**Cell 2019**

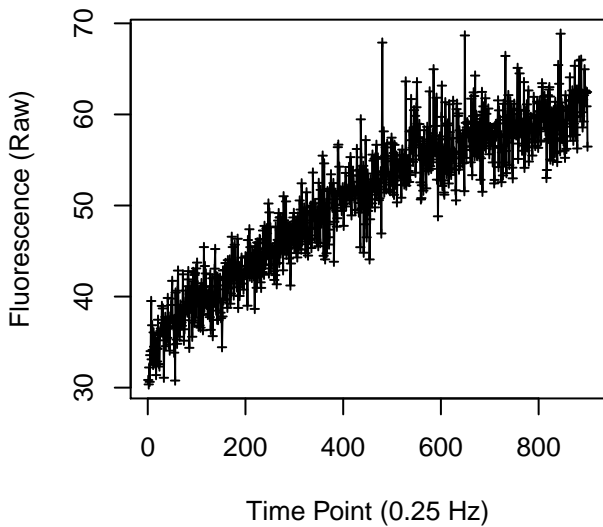

**Cell 2020**

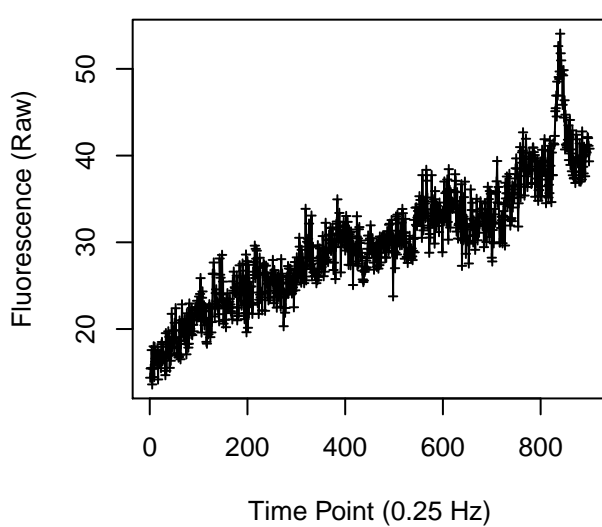

**Cell 2021**

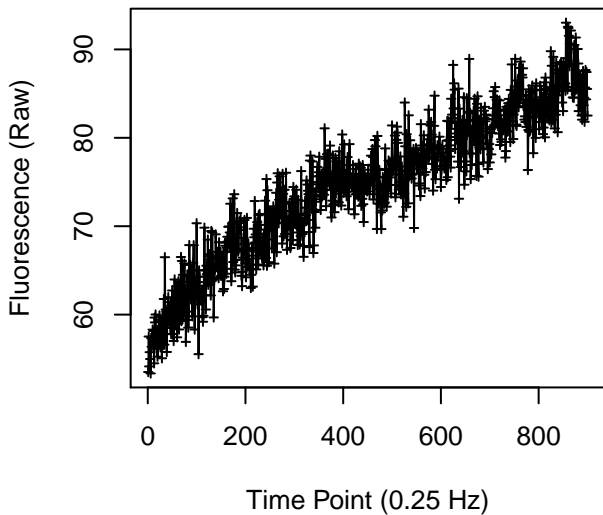

**Cell 2022**

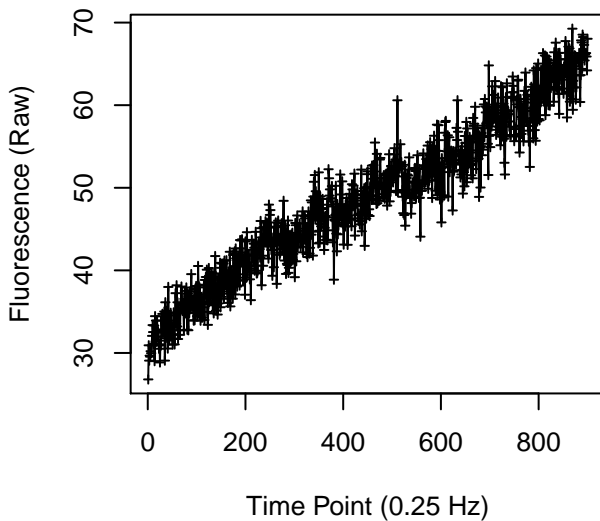

**Cell 2023**

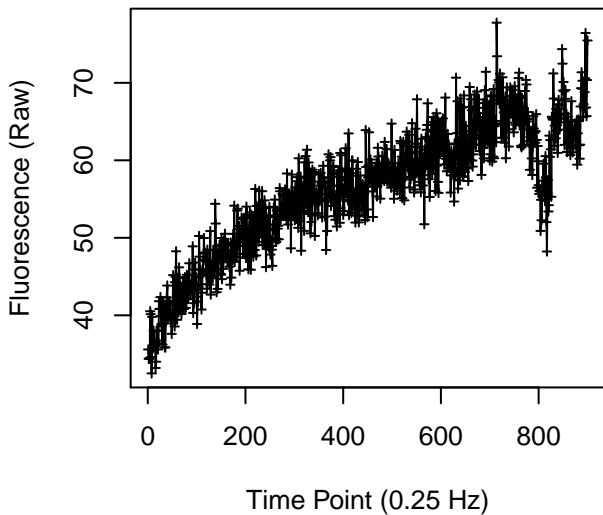

**Cell 2024**

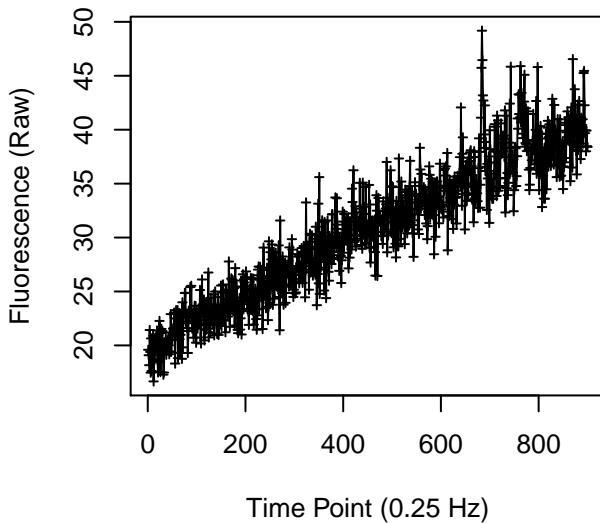



**Cell 2025**

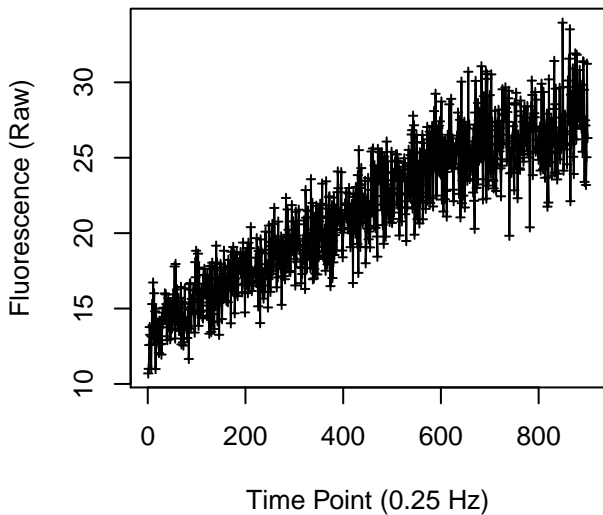

**Cell 2026**

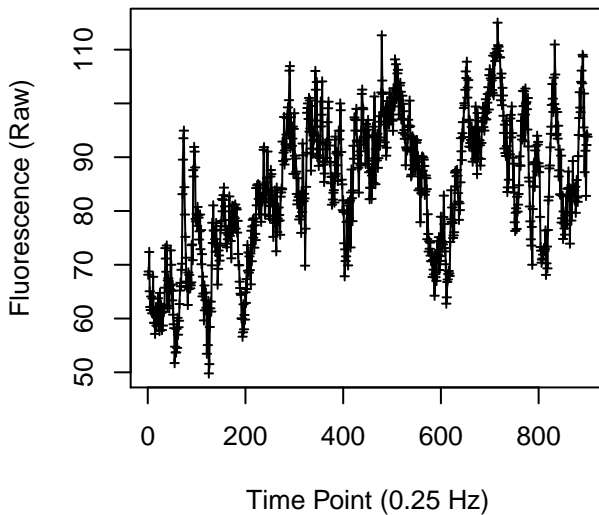

**Cell 2027**

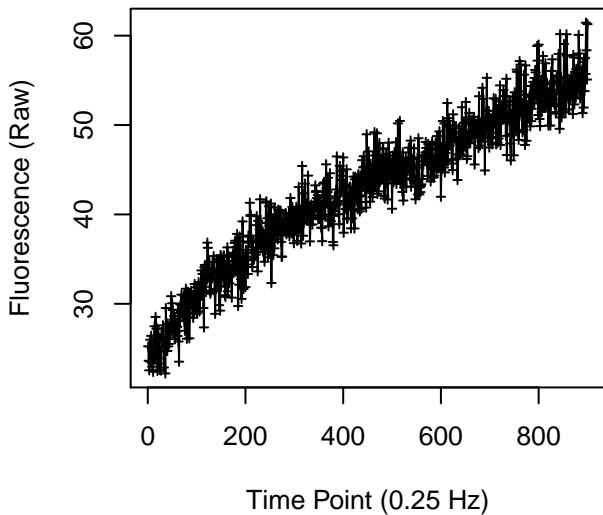

**Cell 2028**

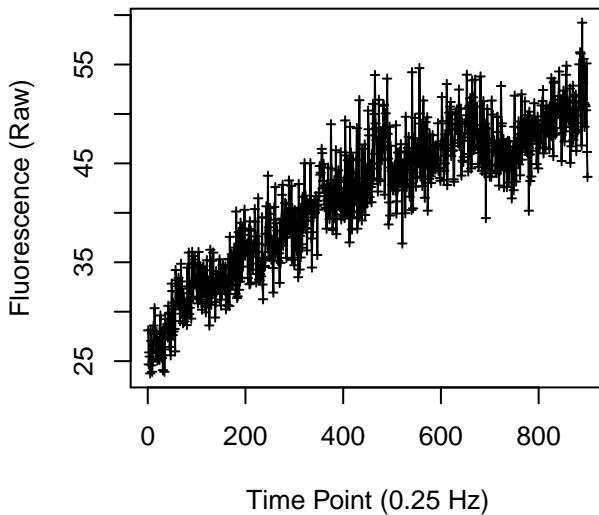

**Cell 2029**

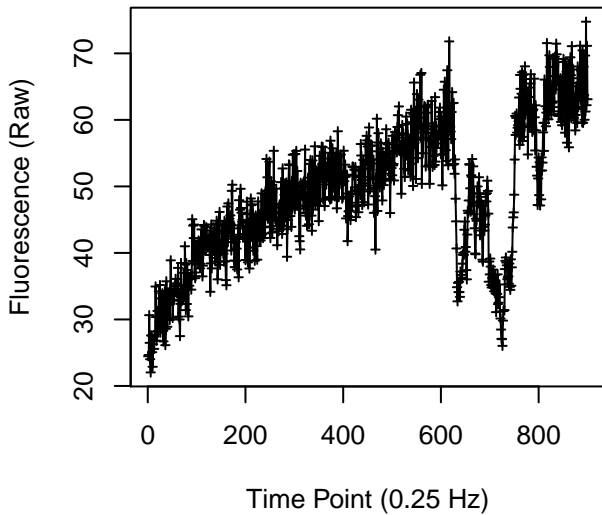

**Cell 2030**

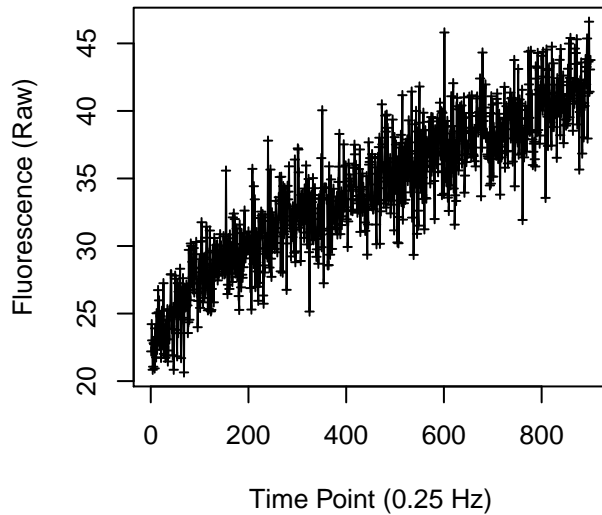

**Cell 2031**

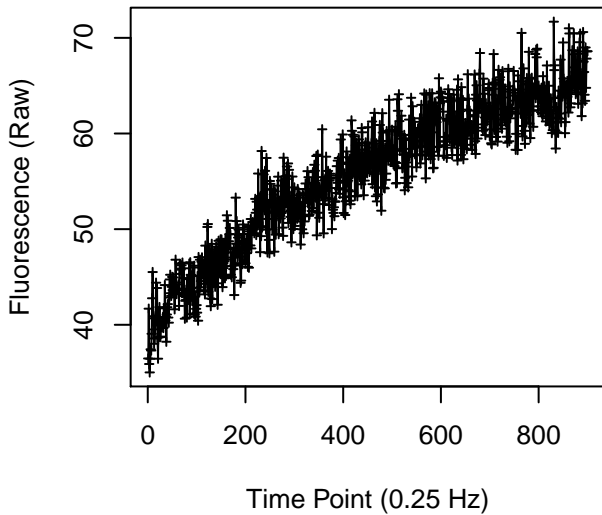

**Cell 2032**

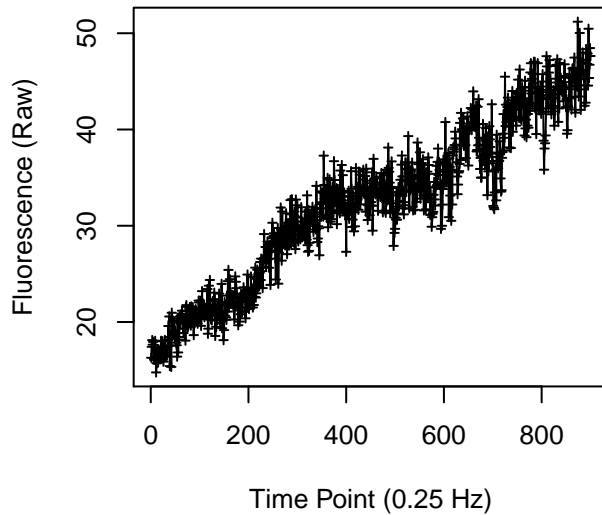

**Cell 2033**

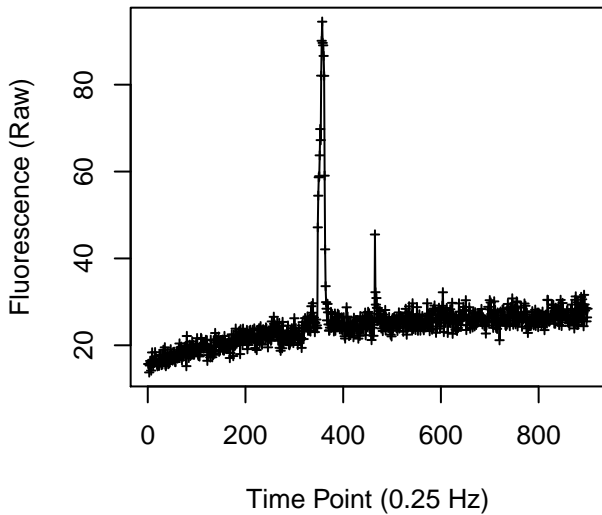

**Cell 2034**

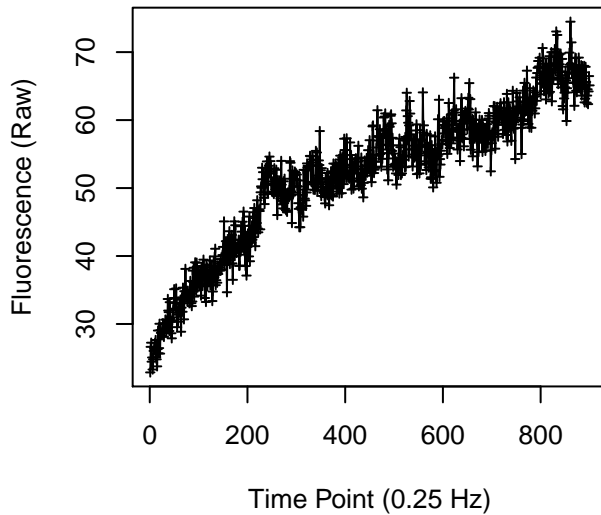

**Cell 2035**

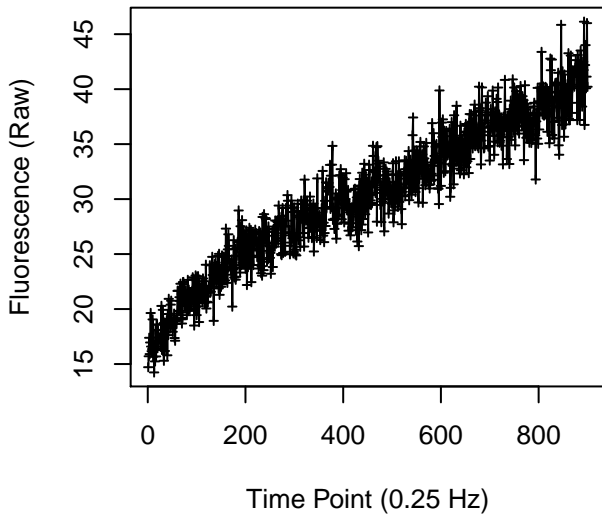

**Cell 2036**

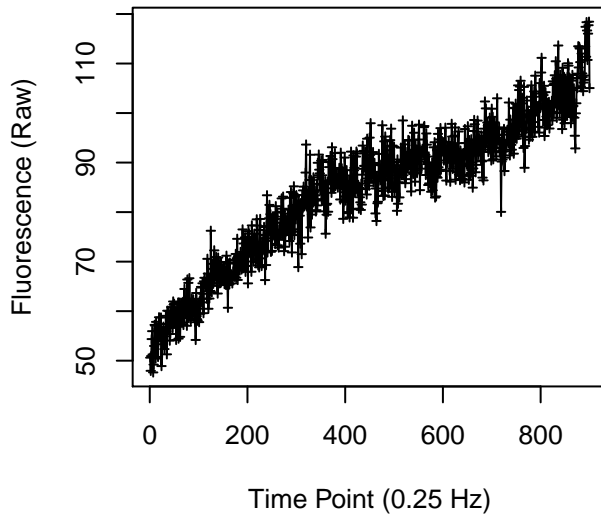

**Cell 2037**

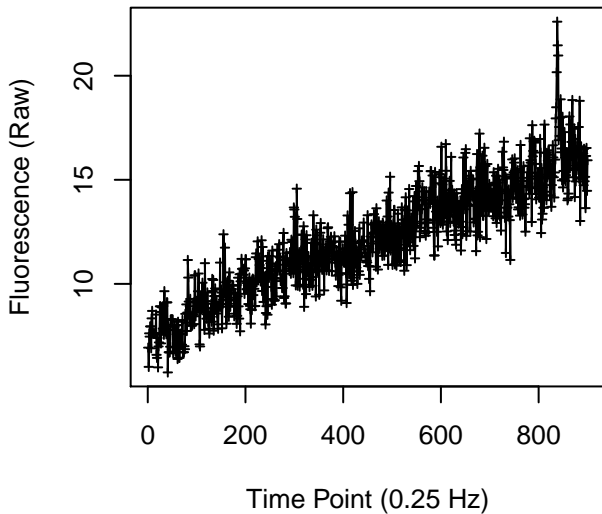

**Cell 2038**

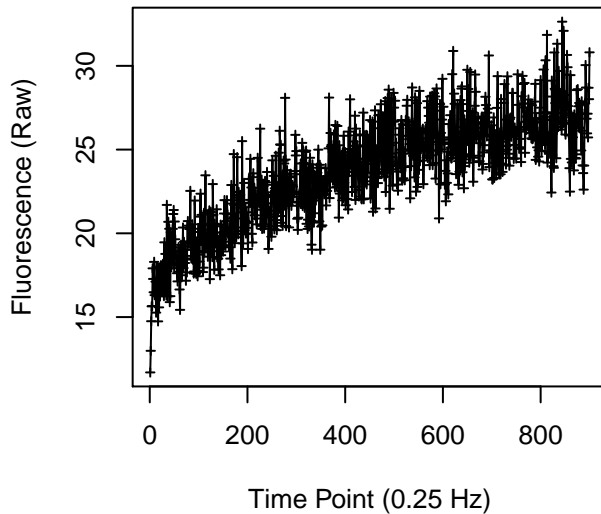

**Cell 2039**

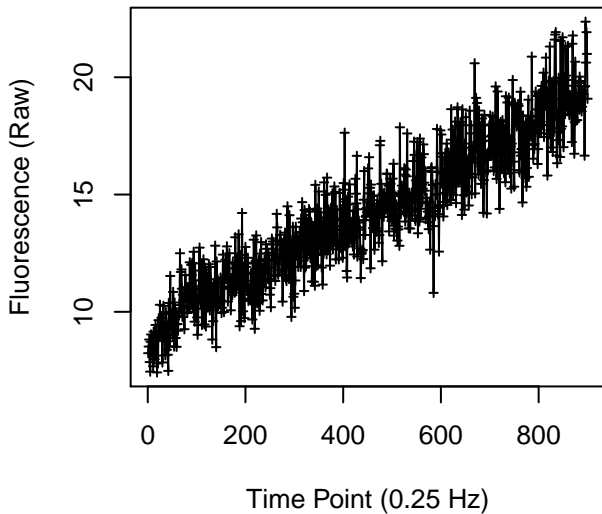

**Cell 2040**

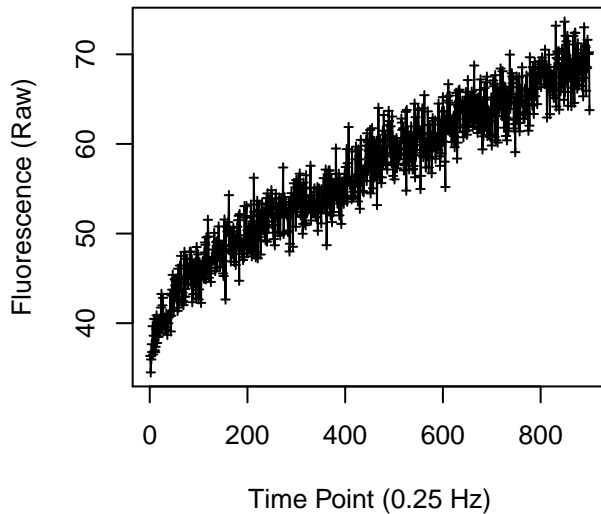

**Cell 2041**

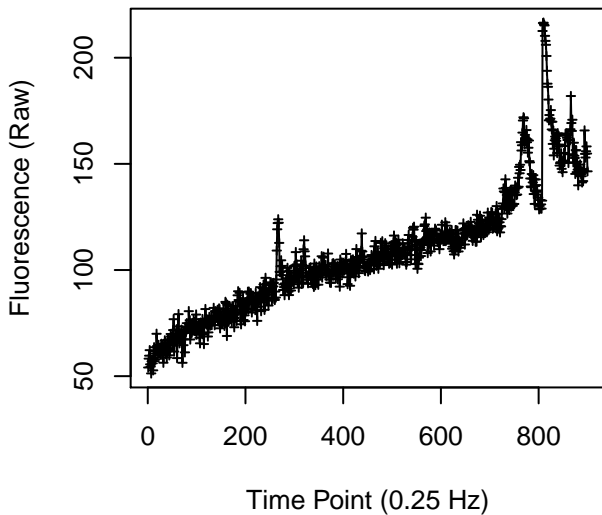

**Cell 2042**

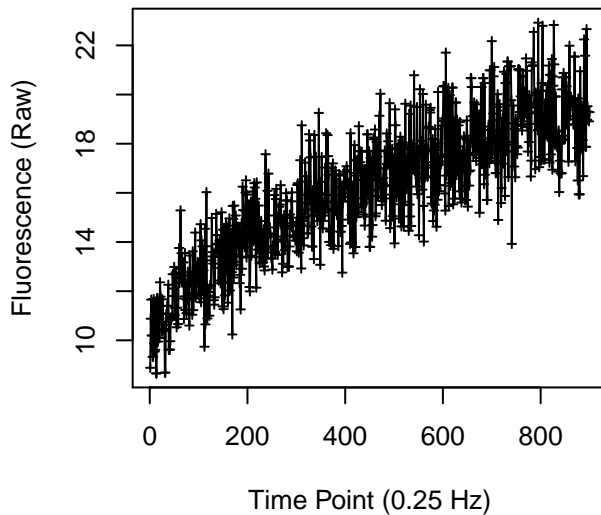

**Cell 2043**

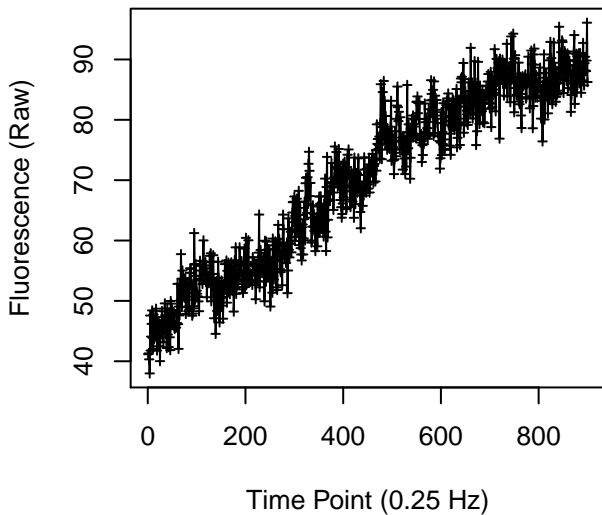

**Cell 2044**

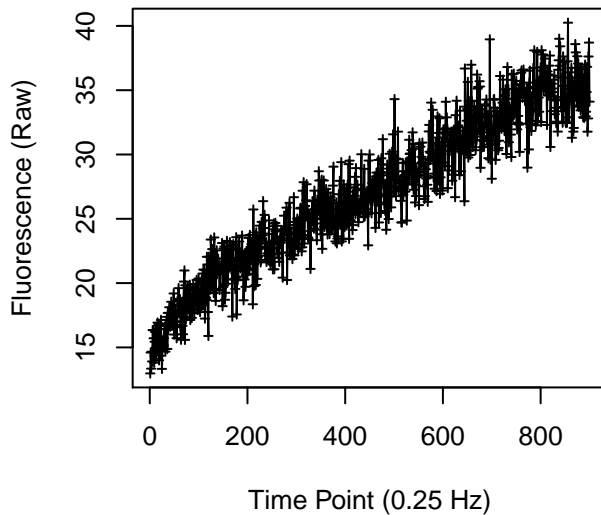

**Cell 2045**

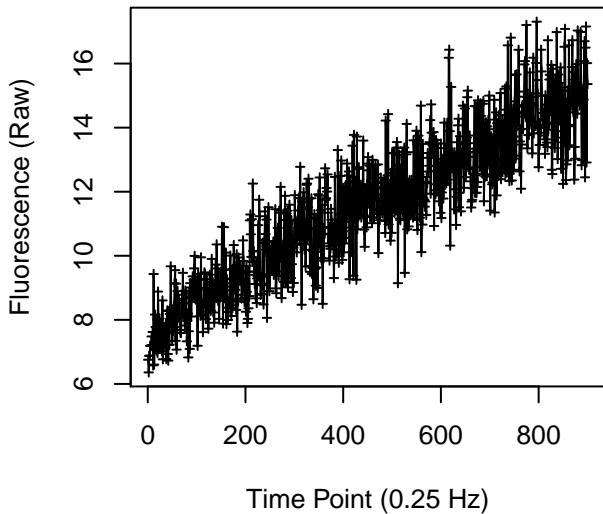

**Cell 2046**

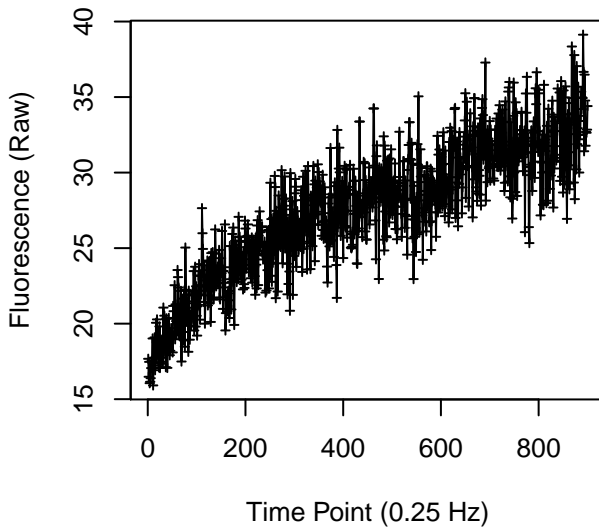

**Cell 2047**

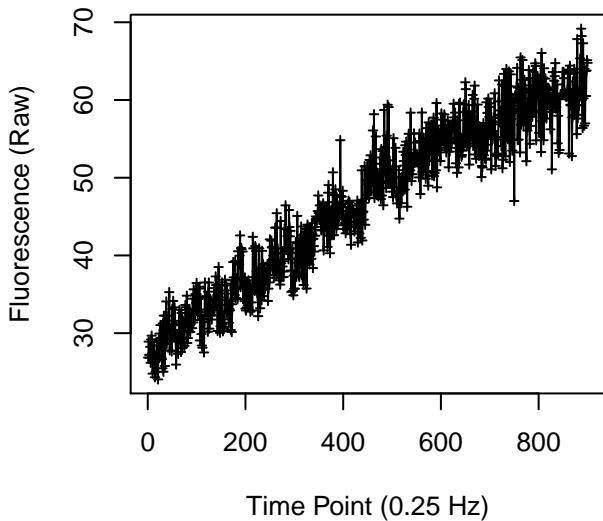

**Cell 2048**

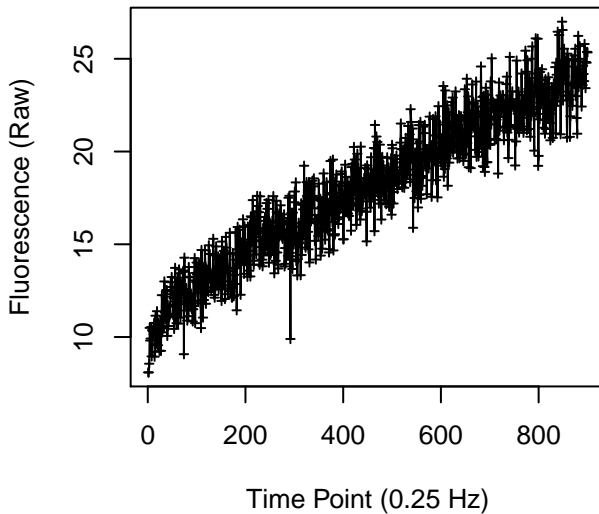

**Cell 2049**

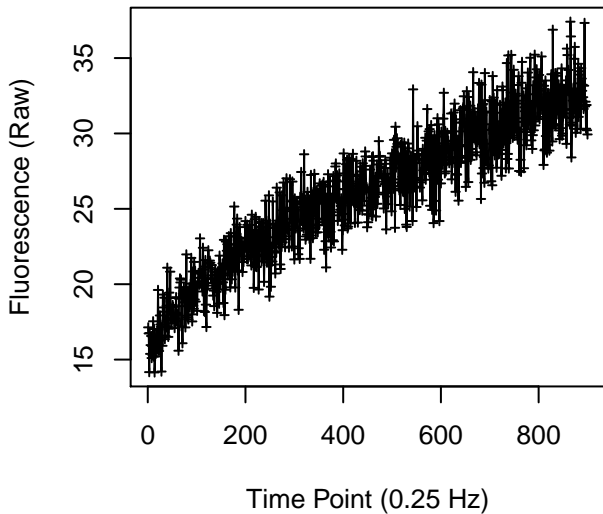

**Cell 2050**

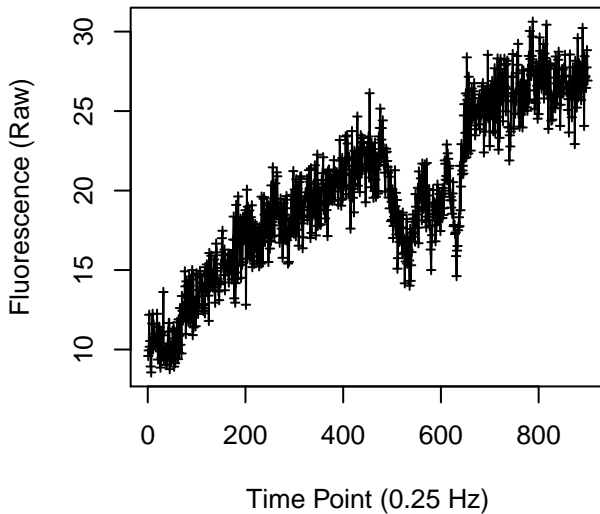

**Cell 2051**

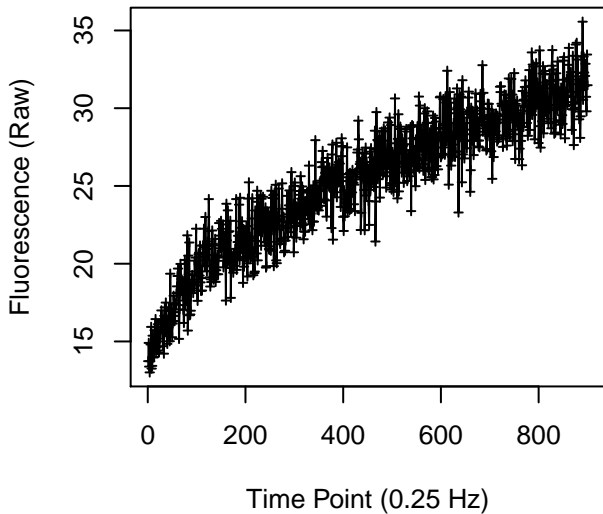

**Cell 2052**

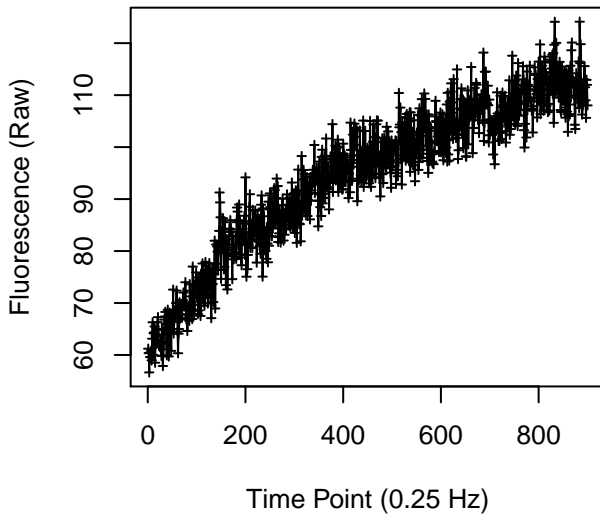

**Cell 2053**

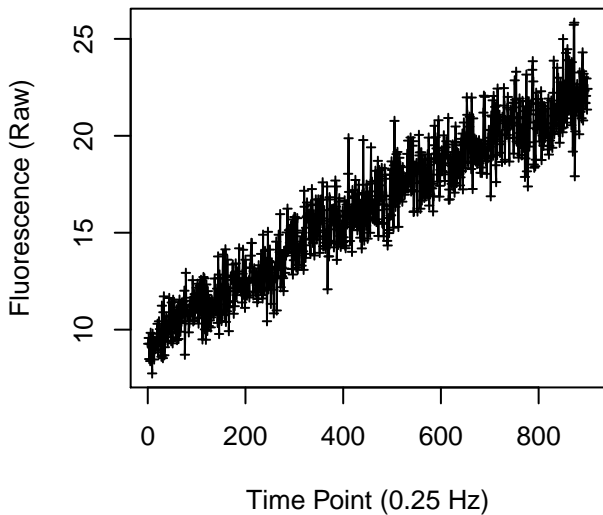

**Cell 2054**

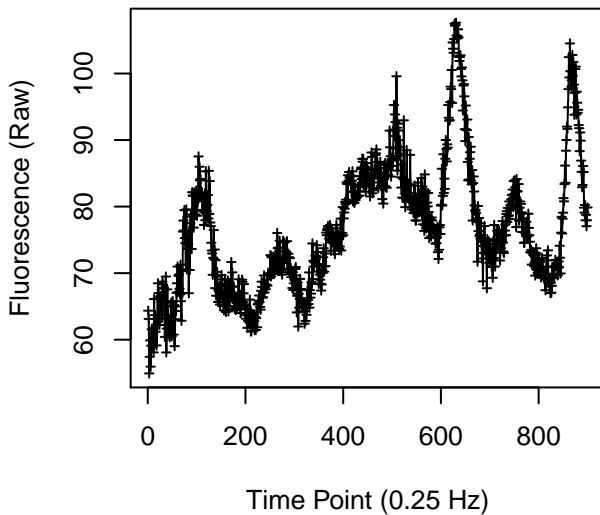

**Cell 2055**

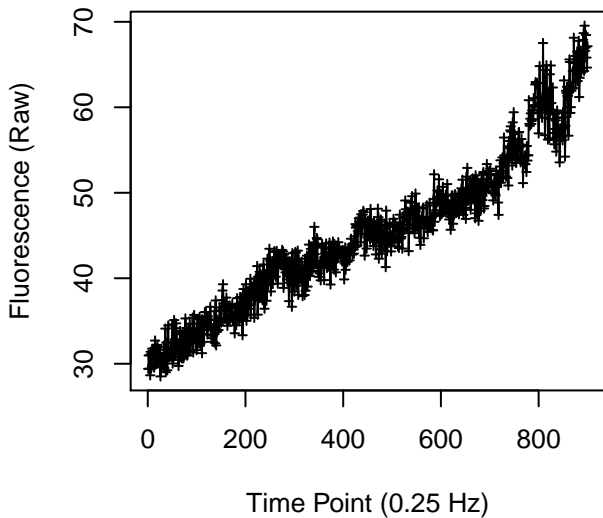

**Cell 2056**

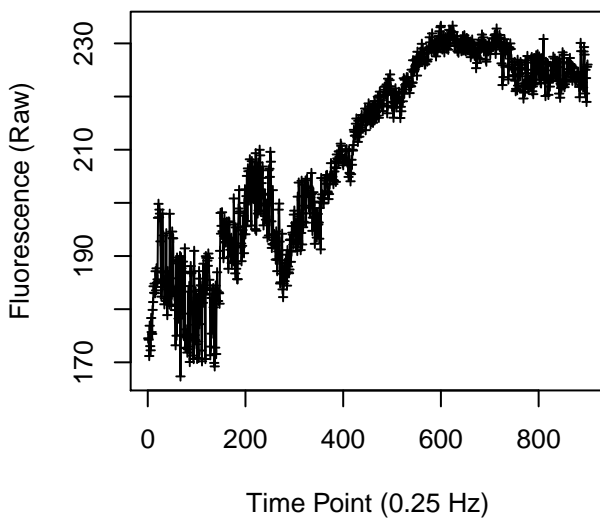



**Cell 2057**

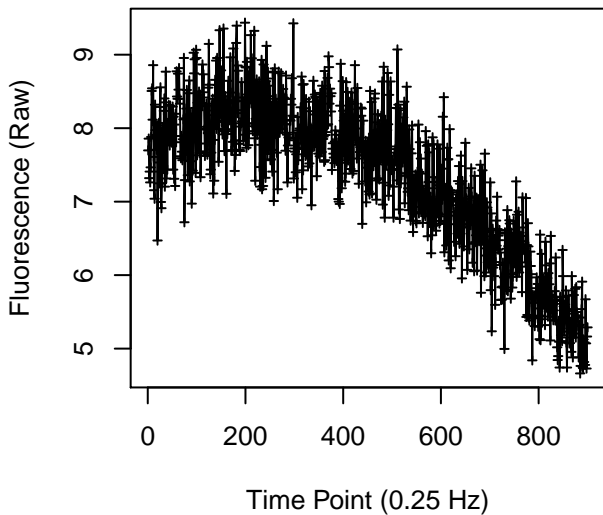

**Cell 2058**

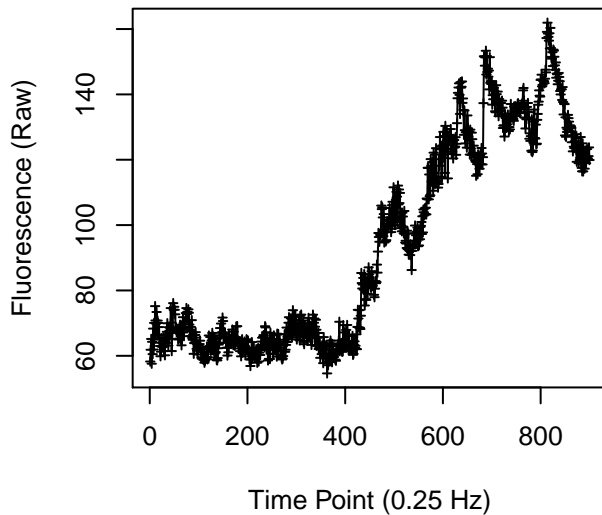

**Cell 2059**

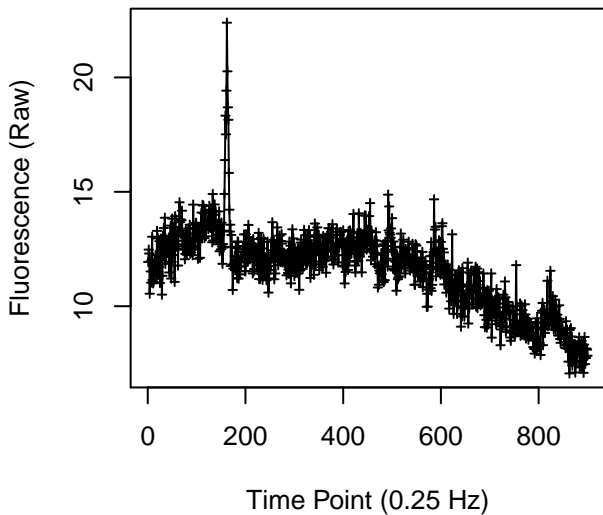

**Cell 2060**

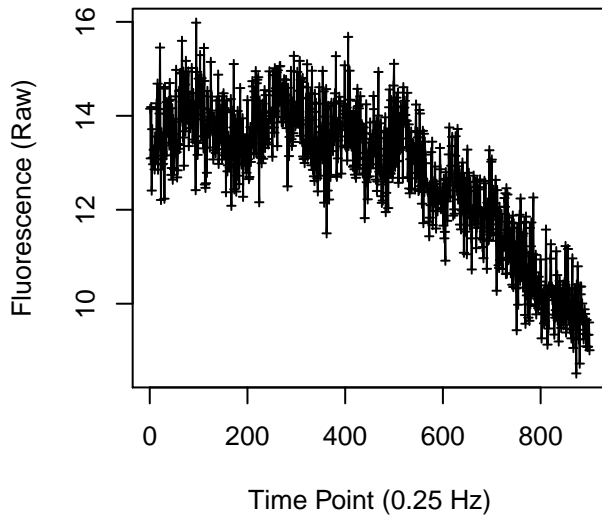

**Cell 2061**

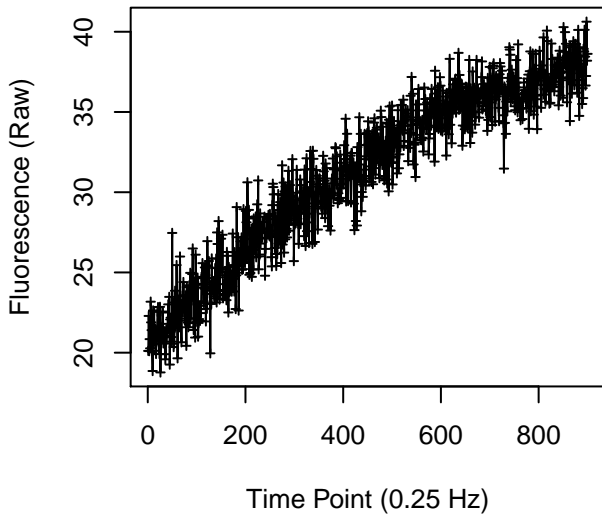

**Cell 2062**

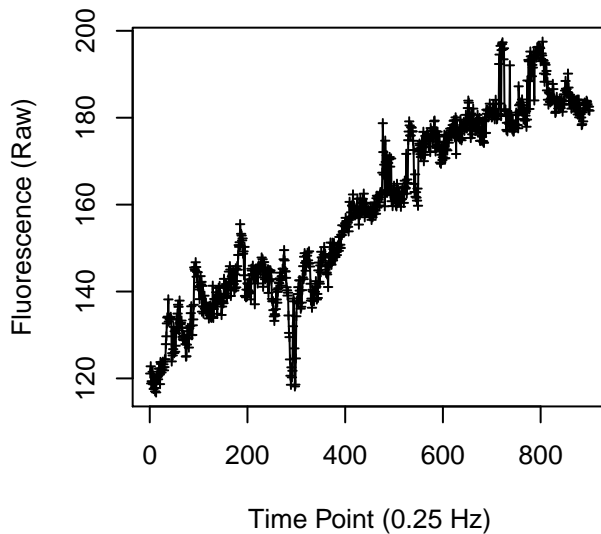

**Cell 2063**

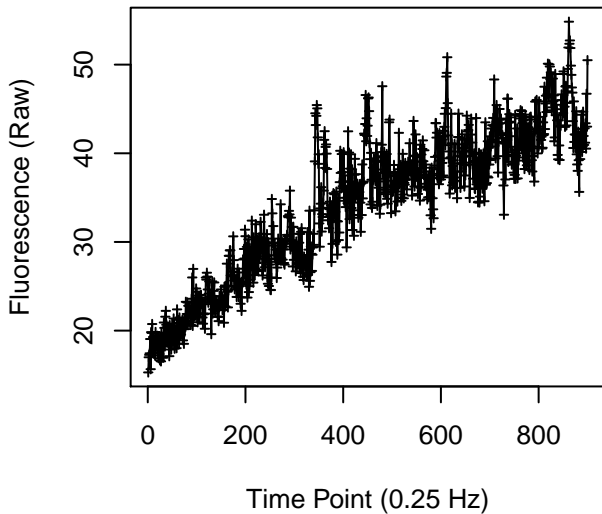

**Cell 2064**

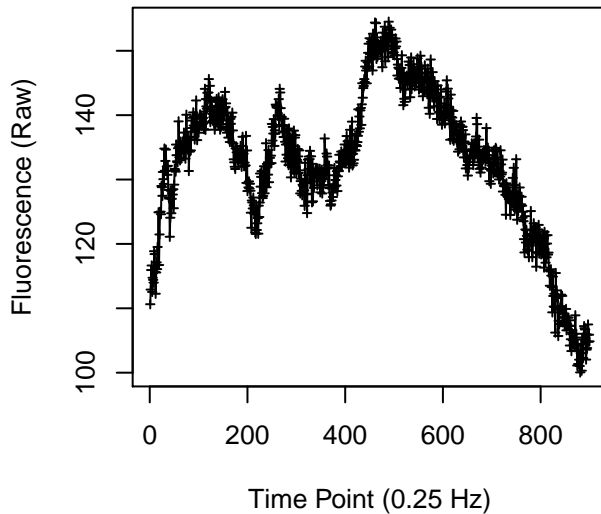

**Cell 2065**

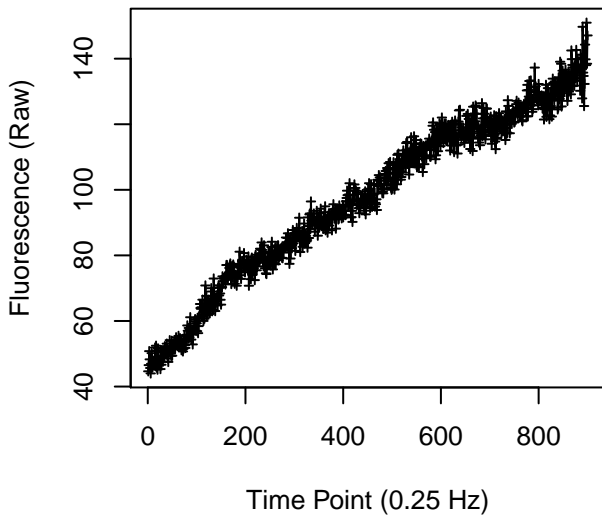

**Cell 2066**

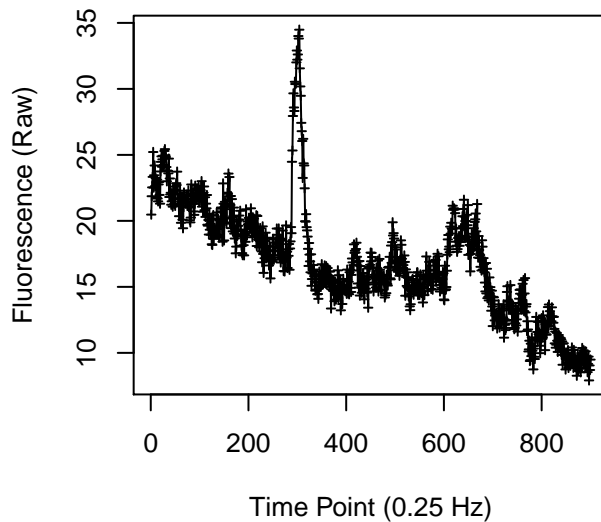

**Cell 2067**

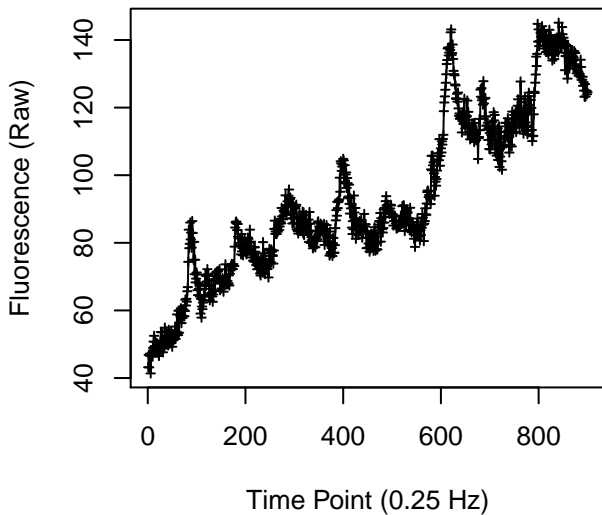

**Cell 2068**

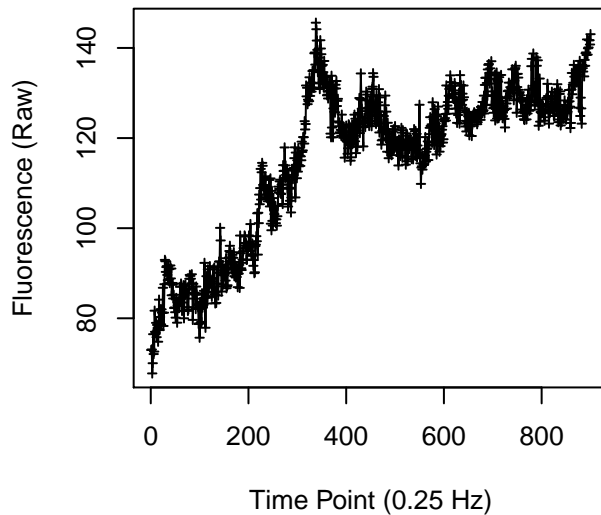

**Cell 2069**

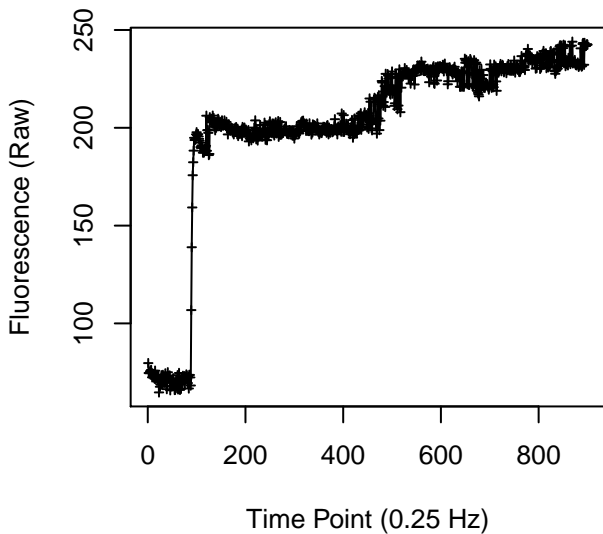

**Cell 2070**

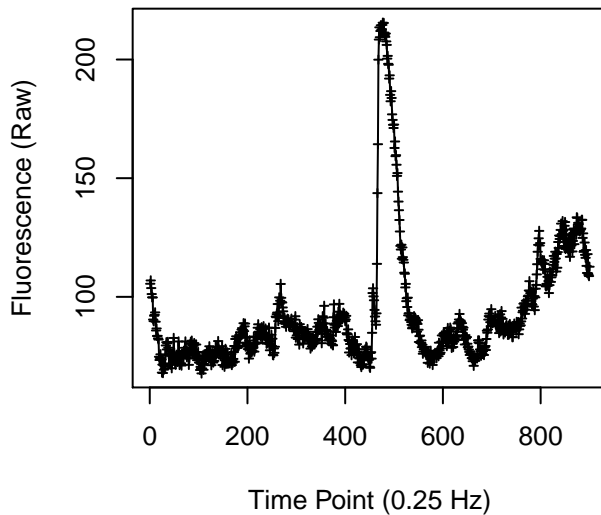

**Cell 2071**

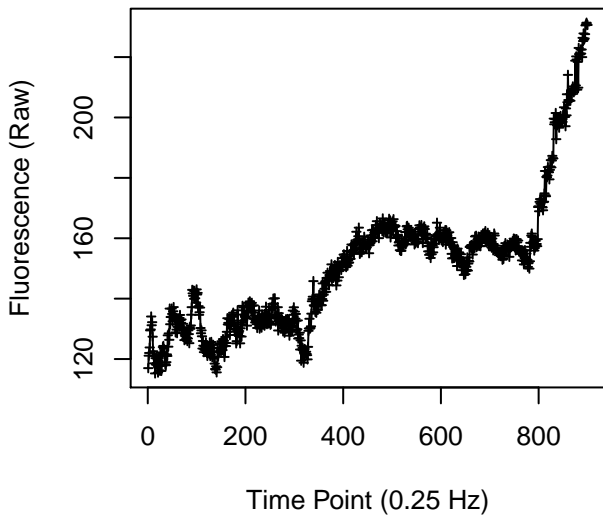

**Cell 2072**

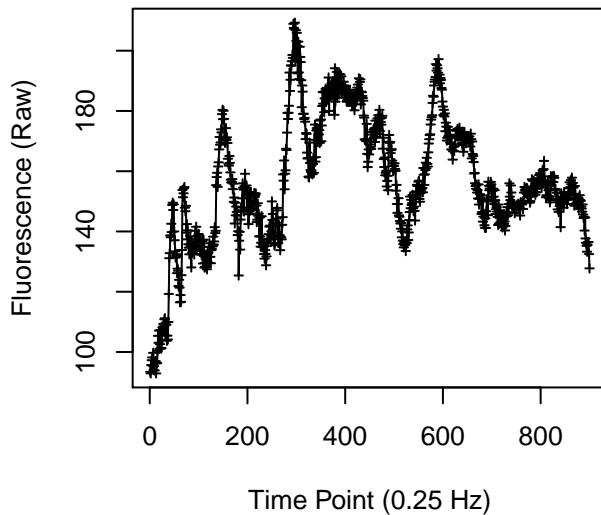

**Cell 2073**

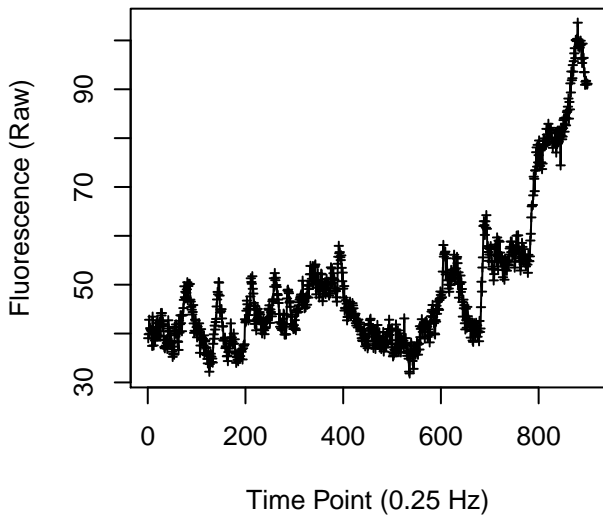

**Cell 2074**

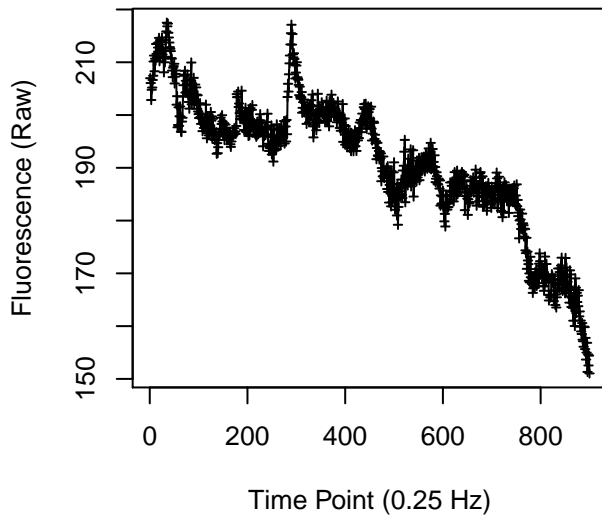

**Cell 2075**

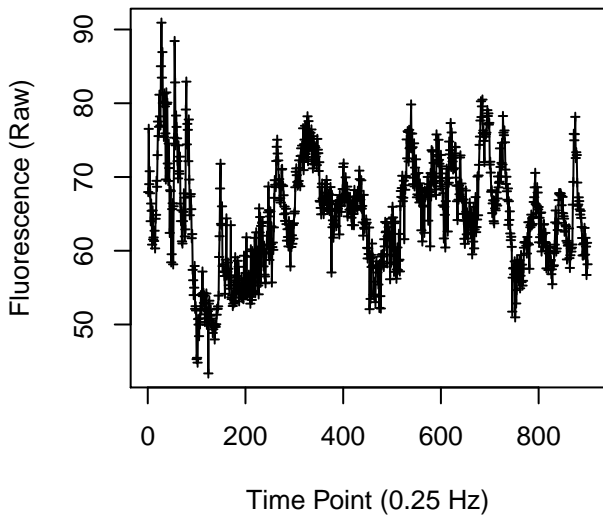

**Cell 2076**

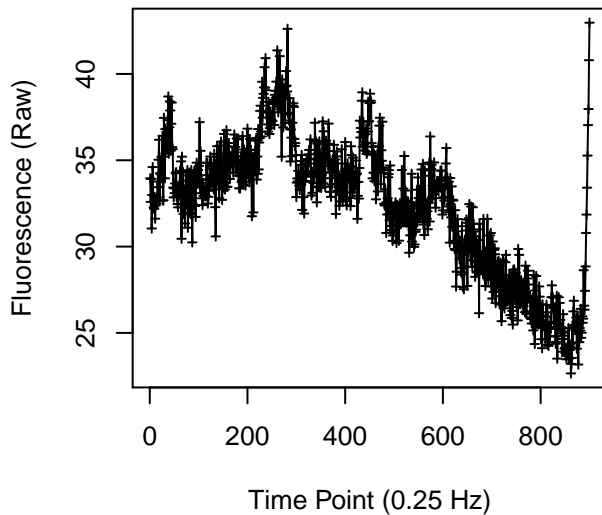

**Cell 2077**

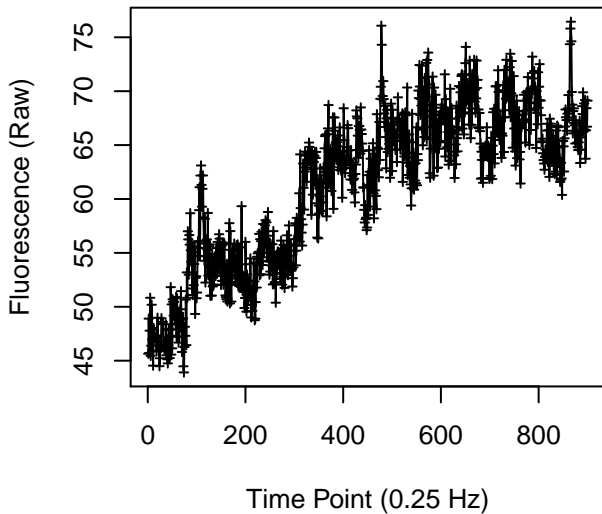

**Cell 2078**

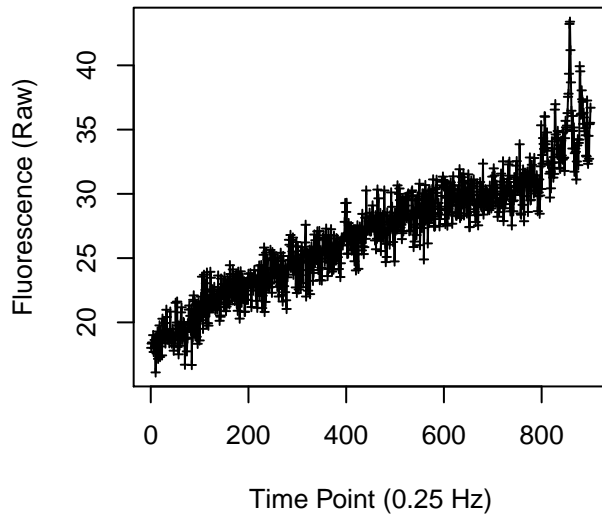

**Cell 2079**

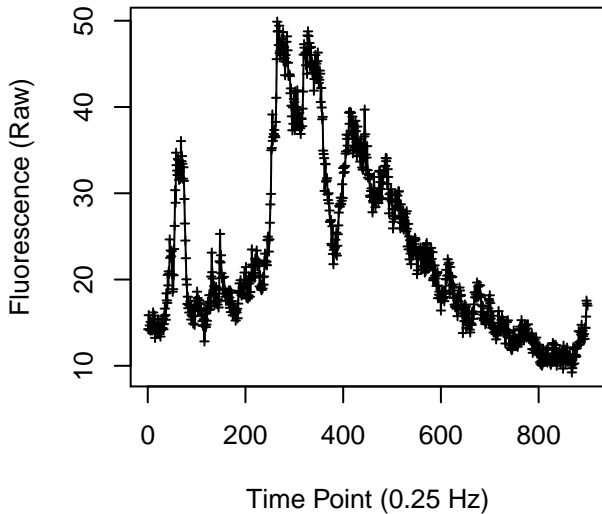

**Cell 2080**

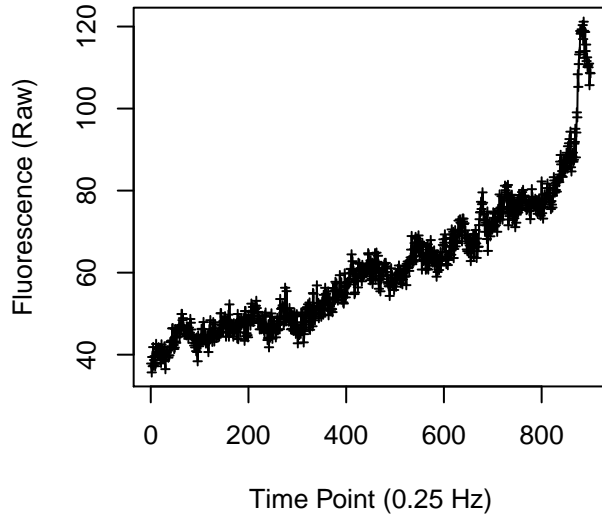

**Cell 2081**

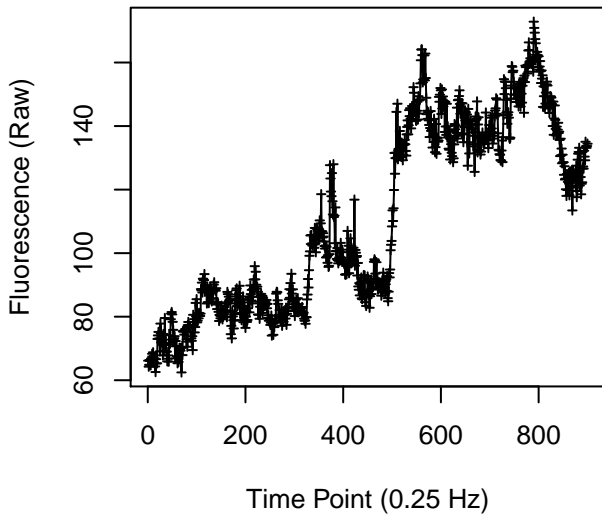

**Cell 2082**

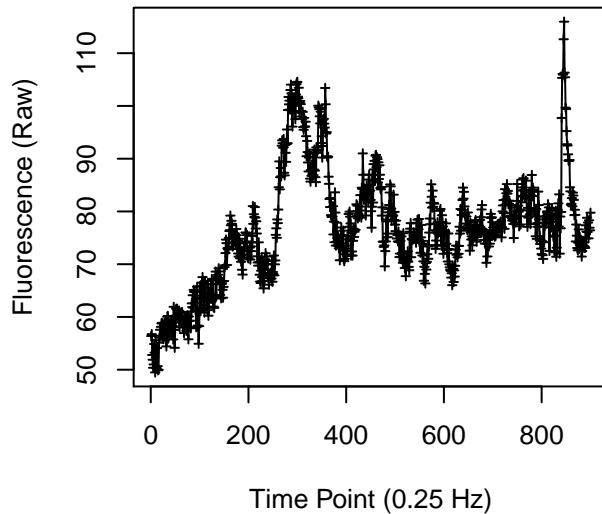

**Cell 2083**

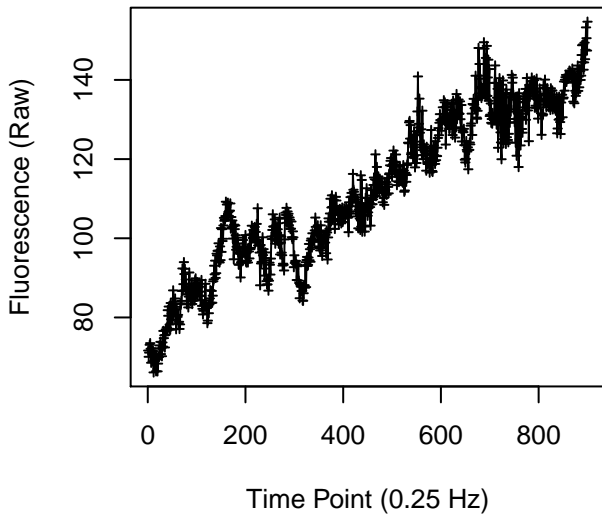

**Cell 2084**

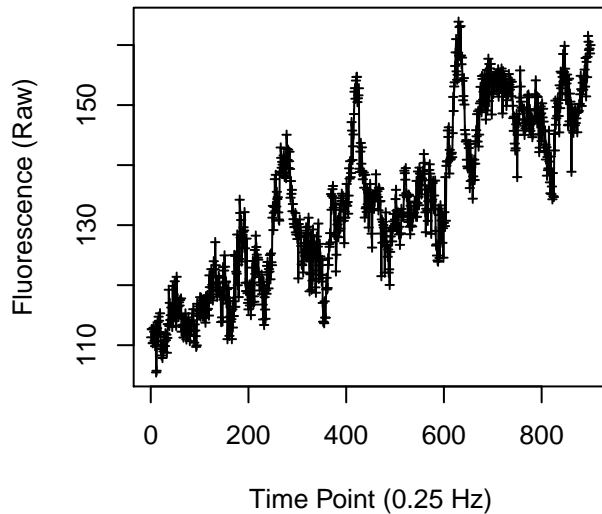

**Cell 2085**

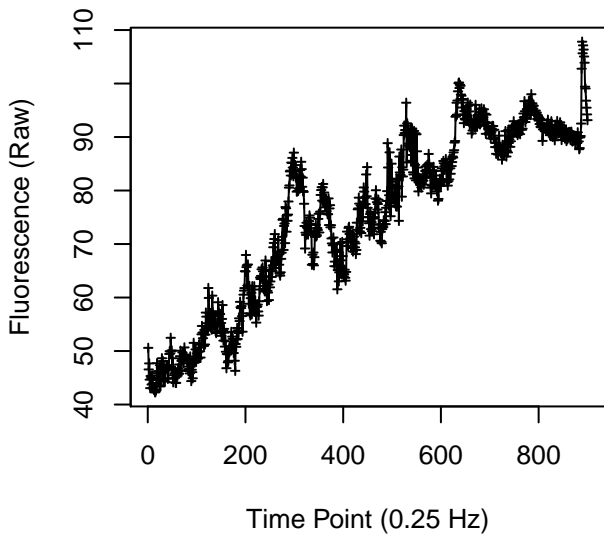

**Cell 2086**

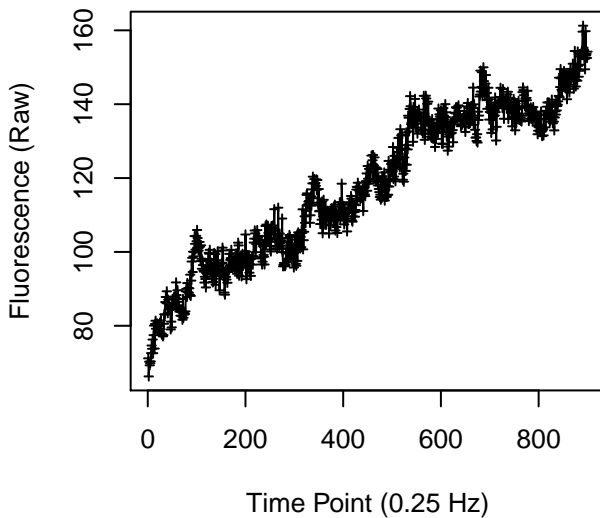

**Cell 2087**

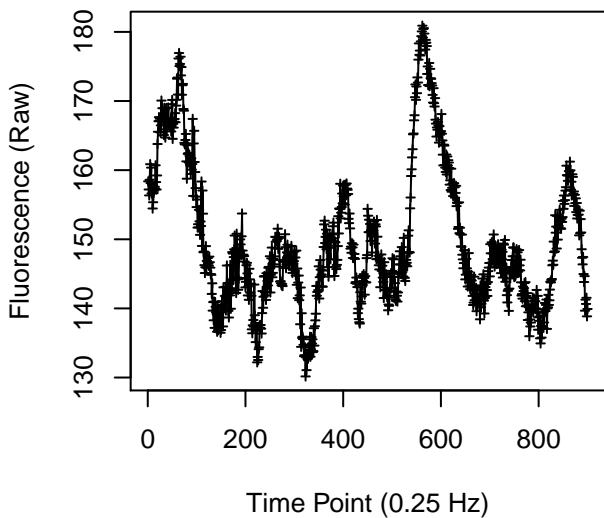

**Cell 2088**

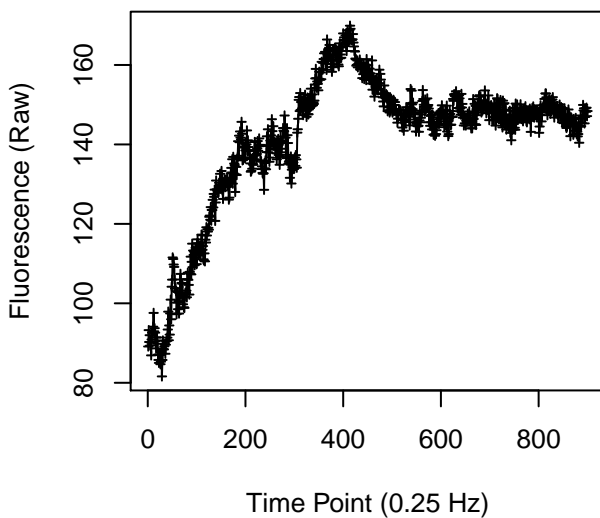



**Cell 2089**

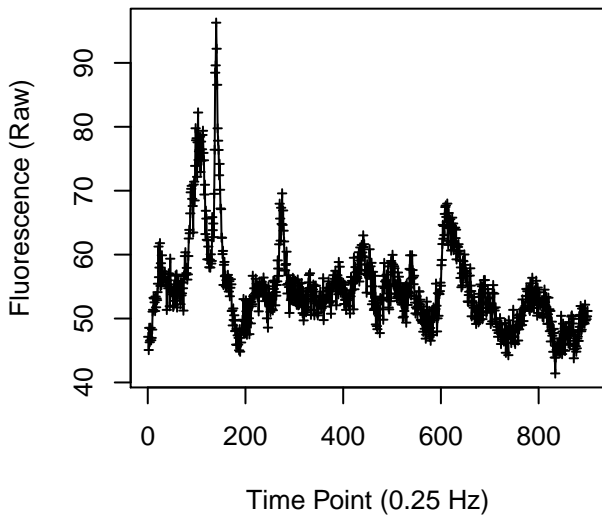

**Cell 2090**

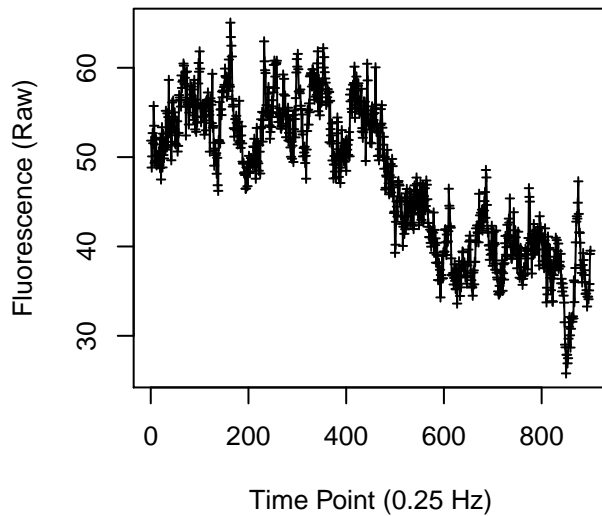

**Cell 2091**

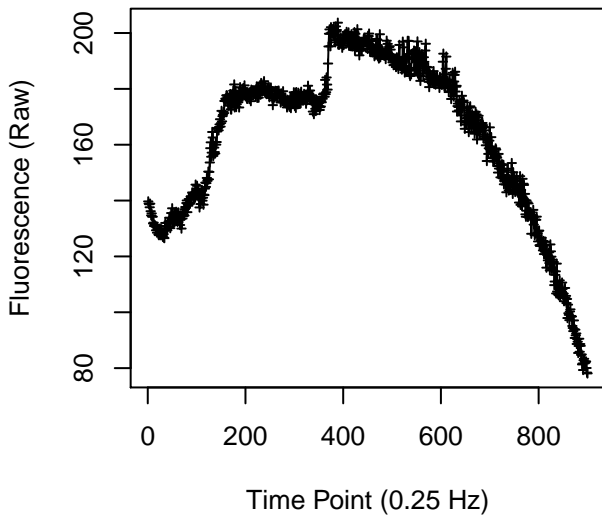

**Cell 2092**

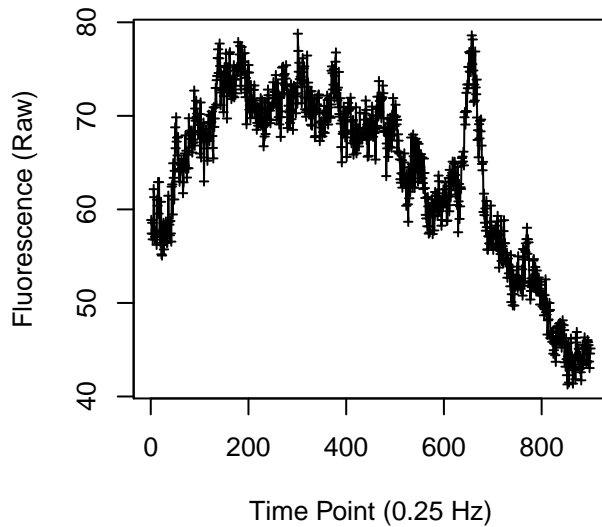

**Cell 2093**

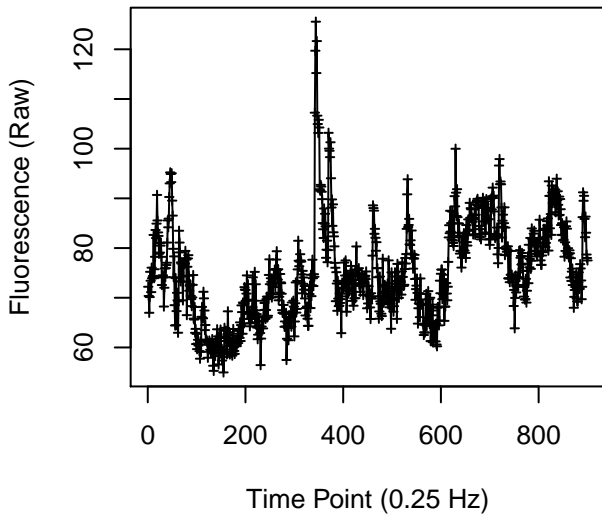

**Cell 2094**

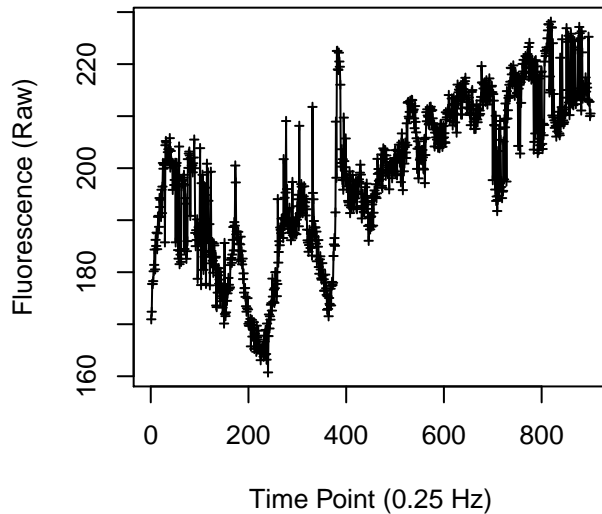

**Cell 2095**

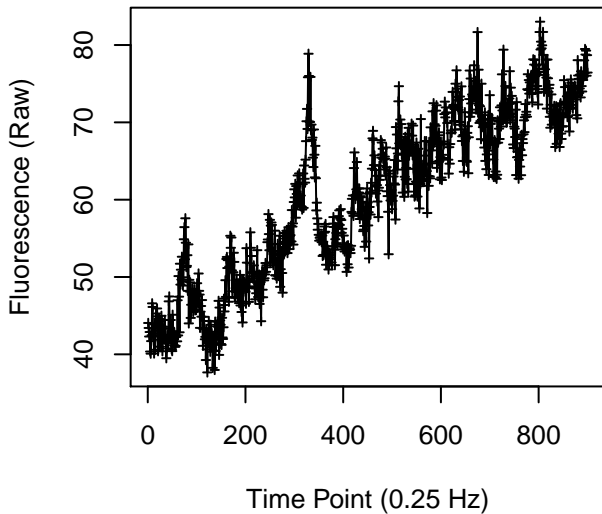

**Cell 2096**

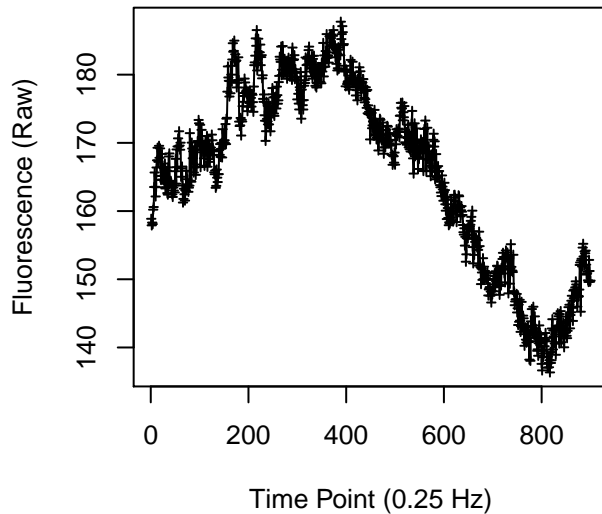

**Cell 2097**

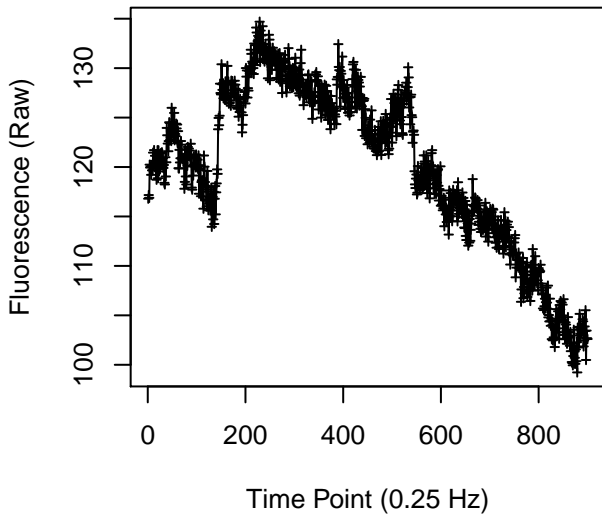

**Cell 2098**

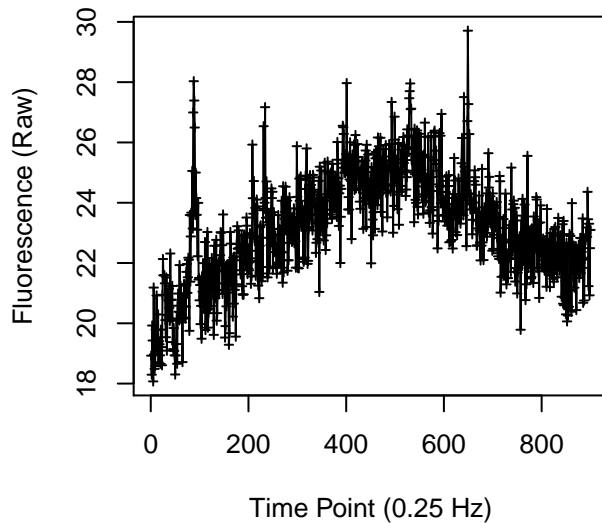

**Cell 2099**

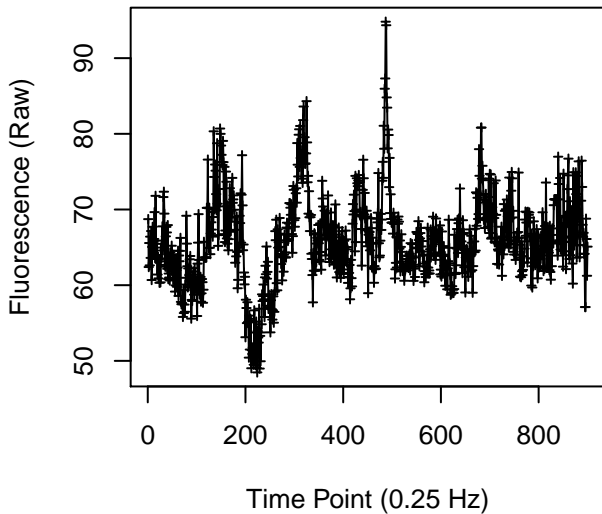

**Cell 2100**

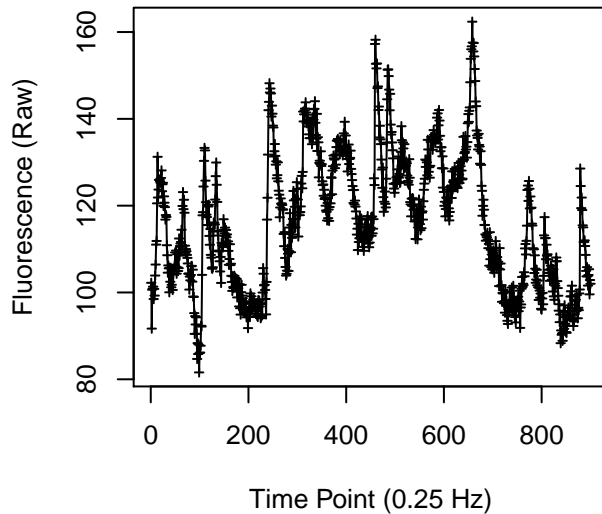

**Cell 2101**

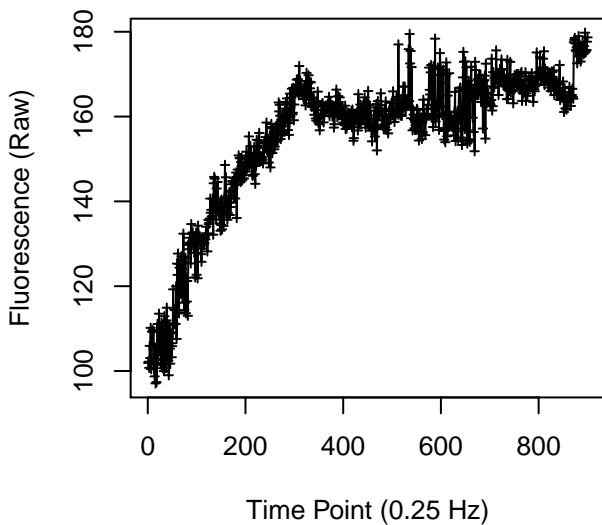

**Cell 2102**

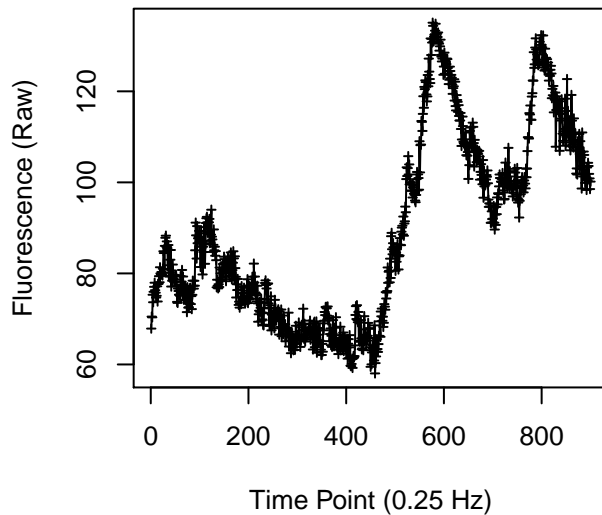

**Cell 2103**

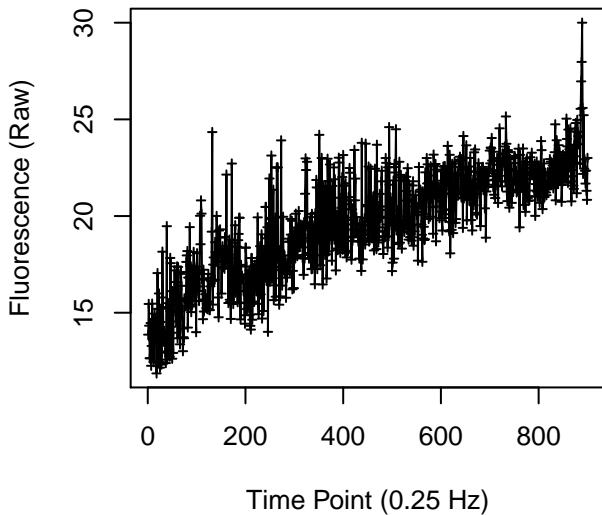

**Cell 2104**

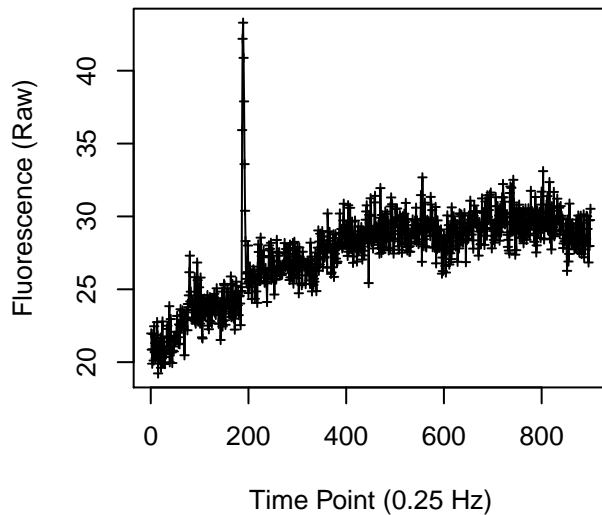

**Cell 2105**

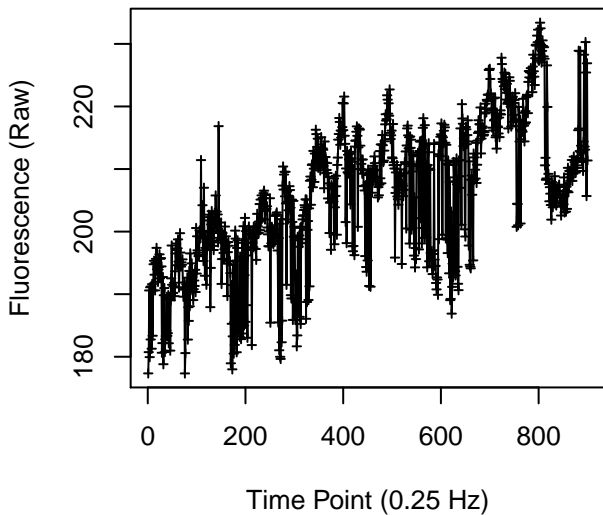

**Cell 2106**

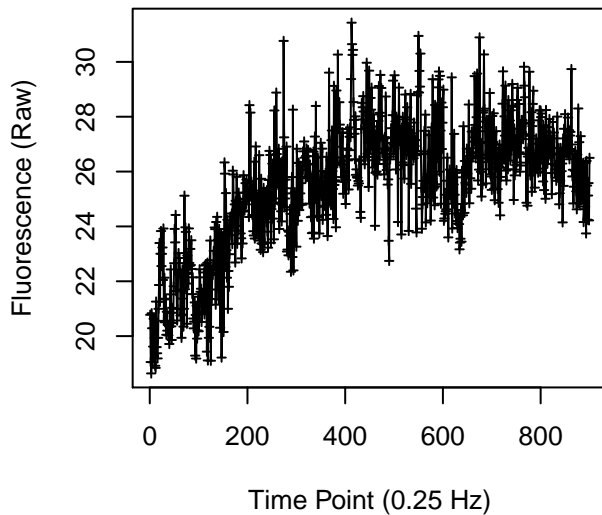

**Cell 2107**

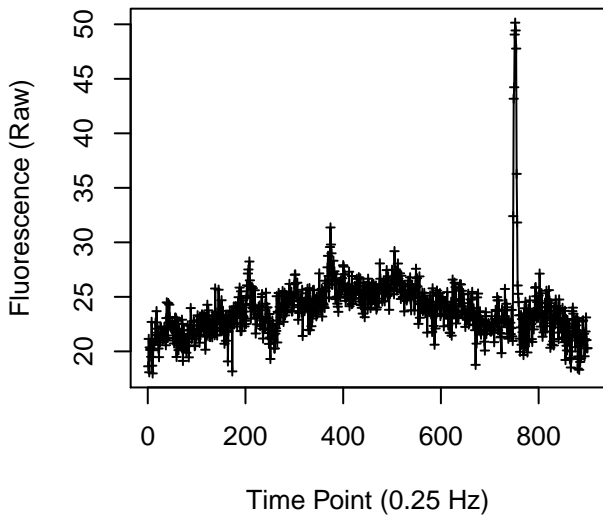

**Cell 2108**

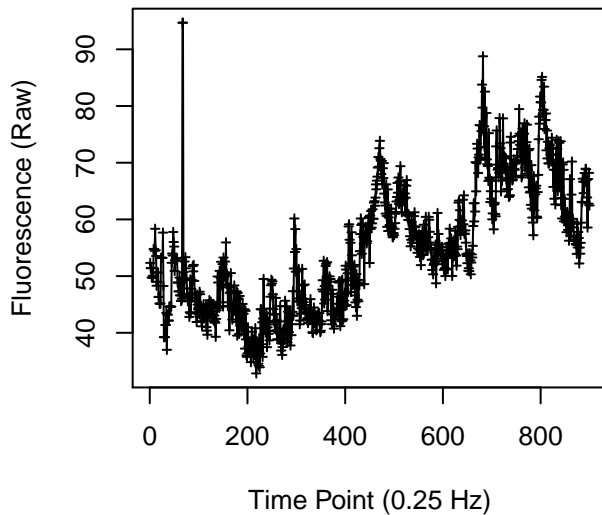

**Cell 2109**

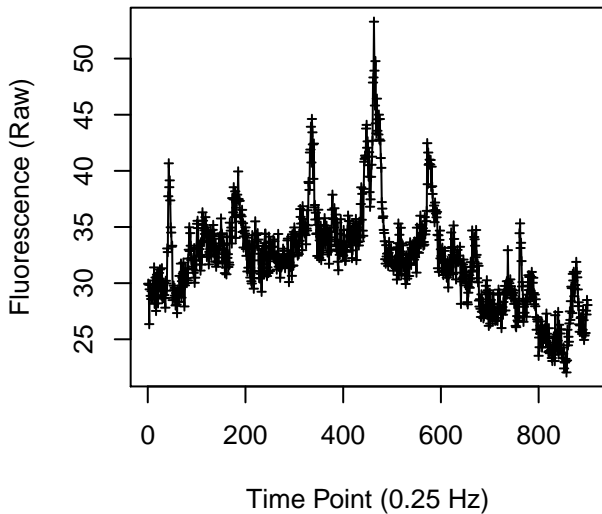

**Cell 2110**

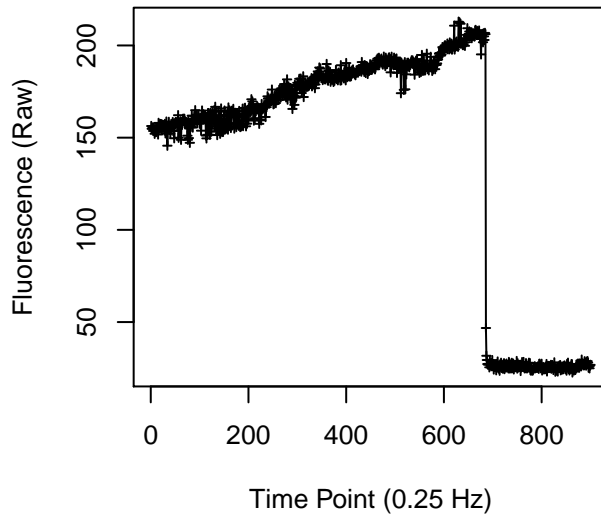

**Cell 2111**

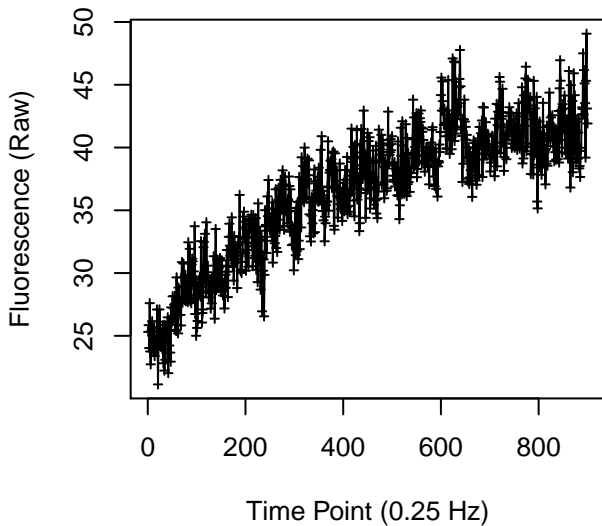

**Cell 2112**

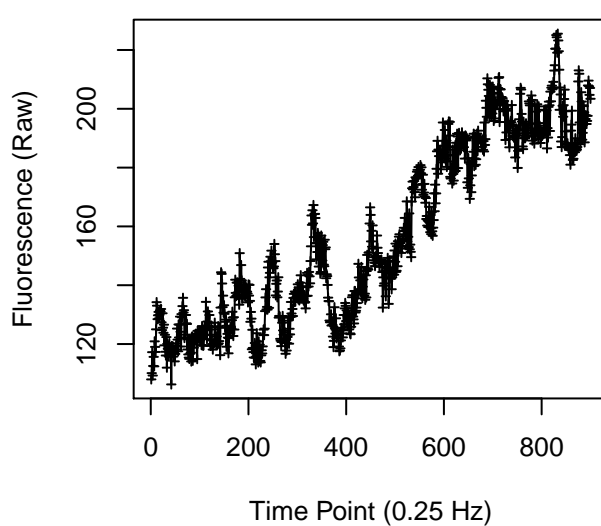

**Cell 2113**

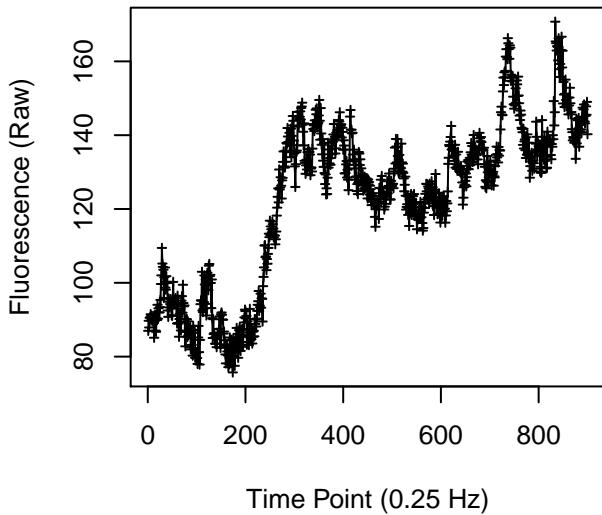

**Cell 2114**

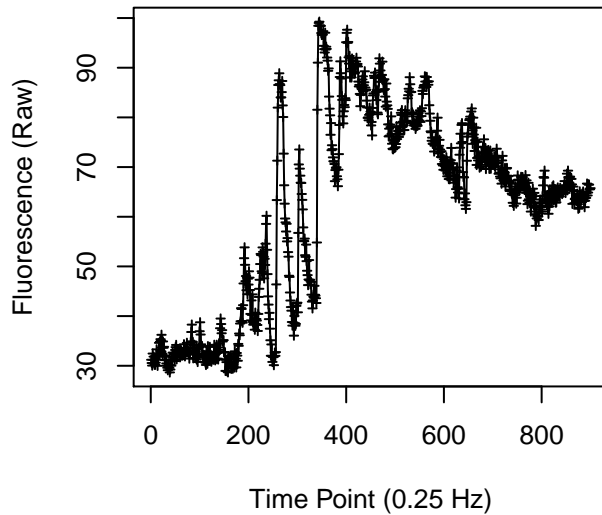

**Cell 2115**

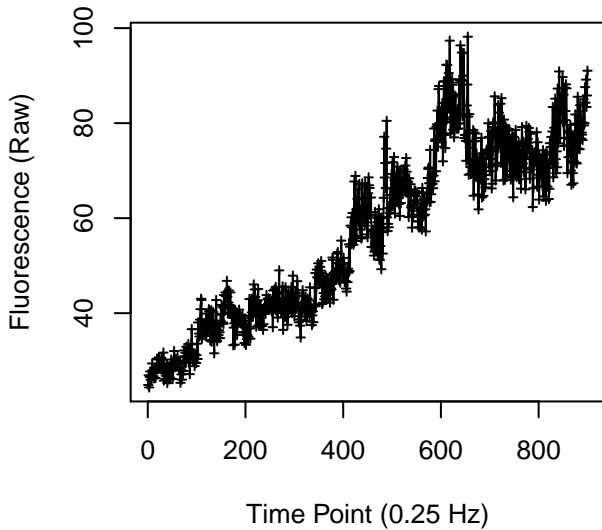

**Cell 2116**

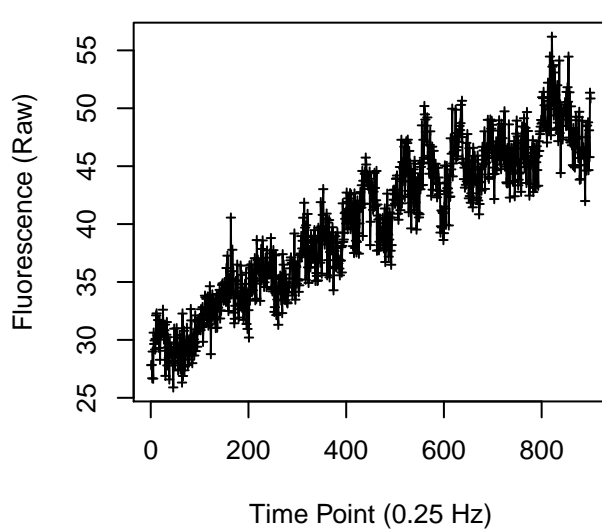

**Cell 2117**

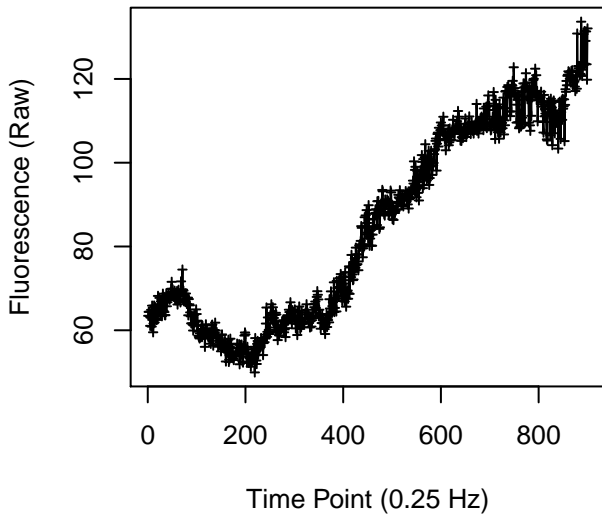

**Cell 2118**

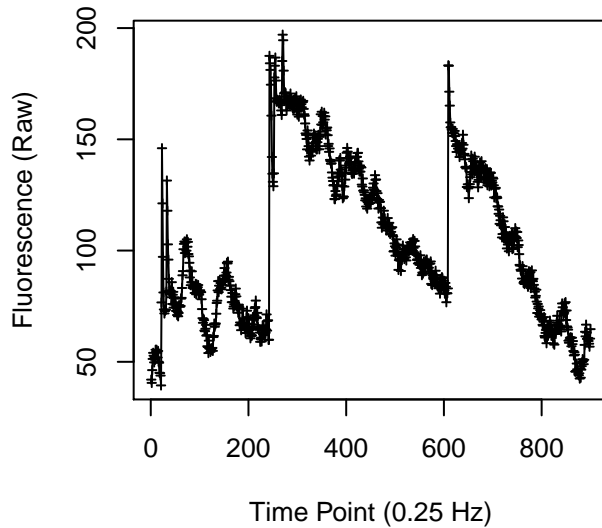

**Cell 2119**

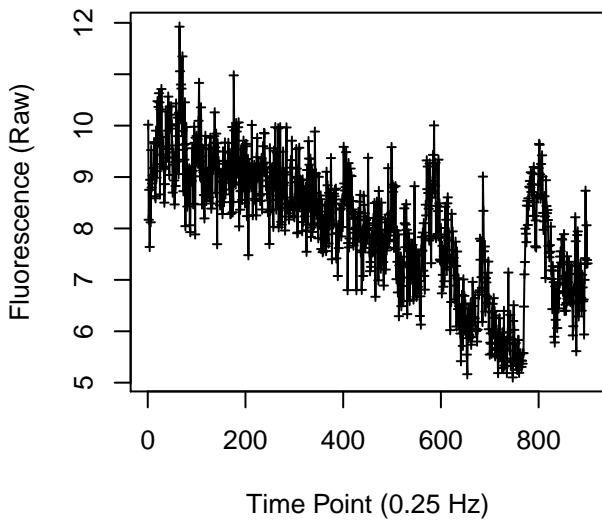

**Cell 2120**

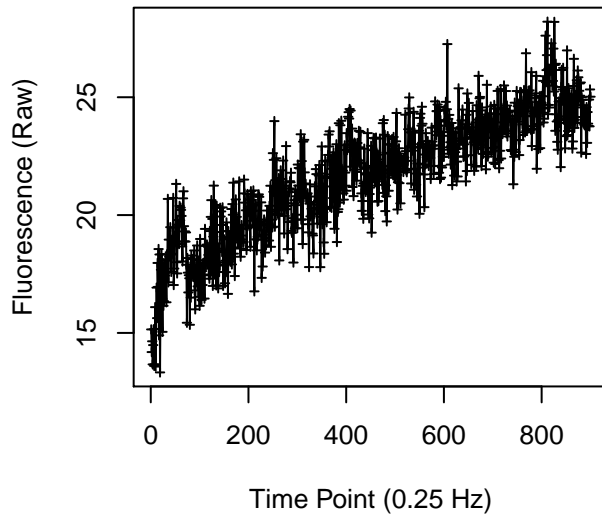



**Cell 2121**

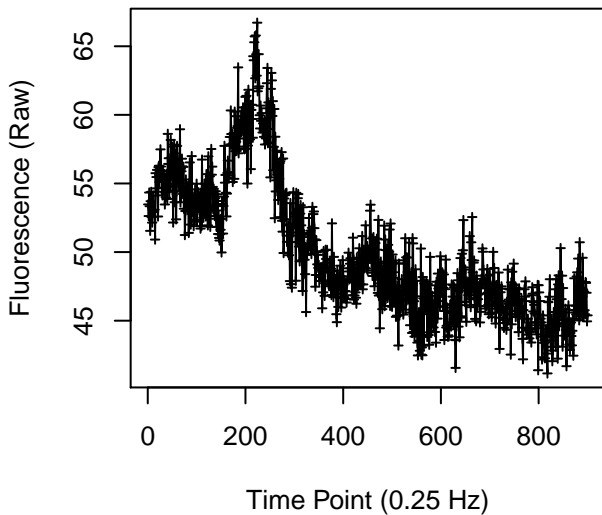

**Cell 2122**

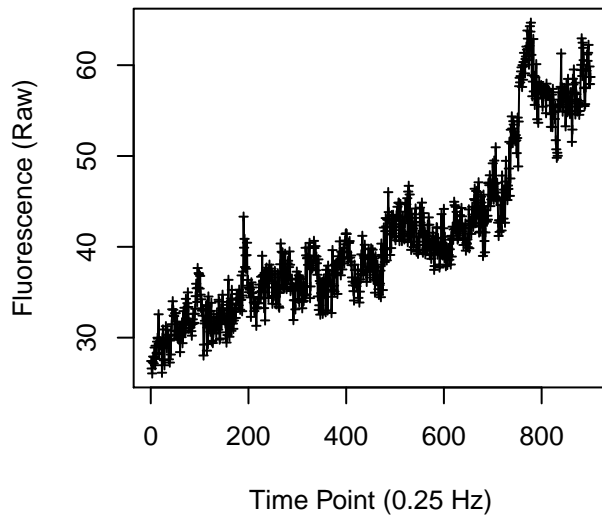

**Cell 2123**

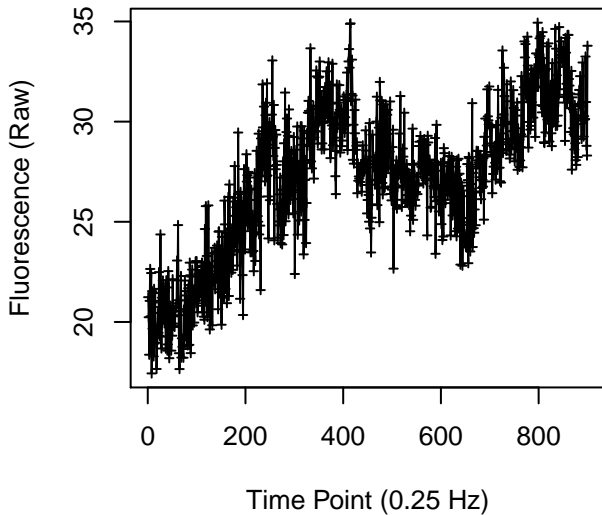

**Cell 2124**

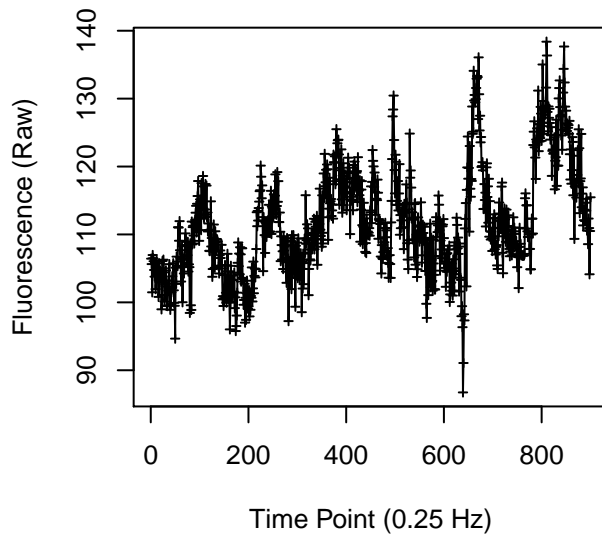

**Cell 2125**

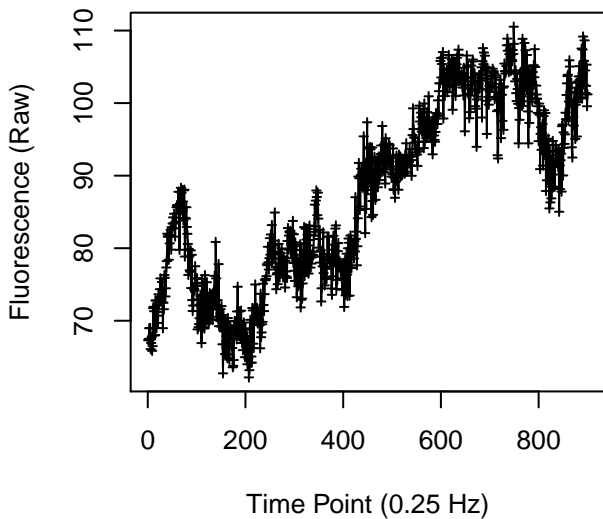

**Cell 2126**

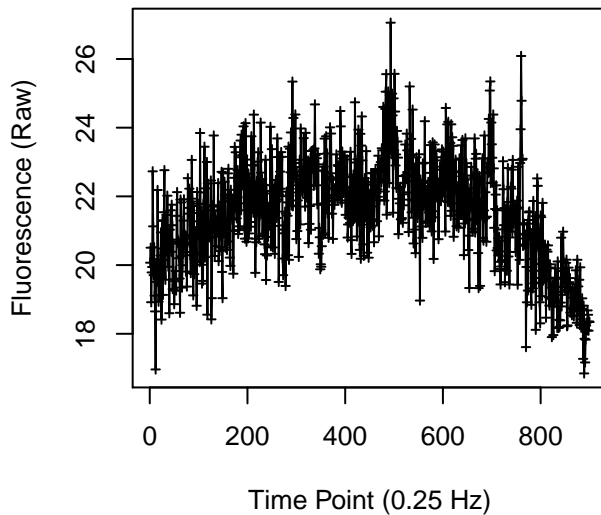

**Cell 2127**

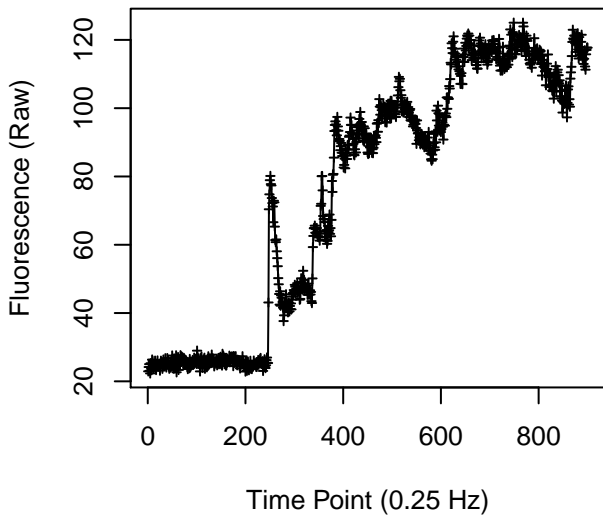

**Cell 2128**

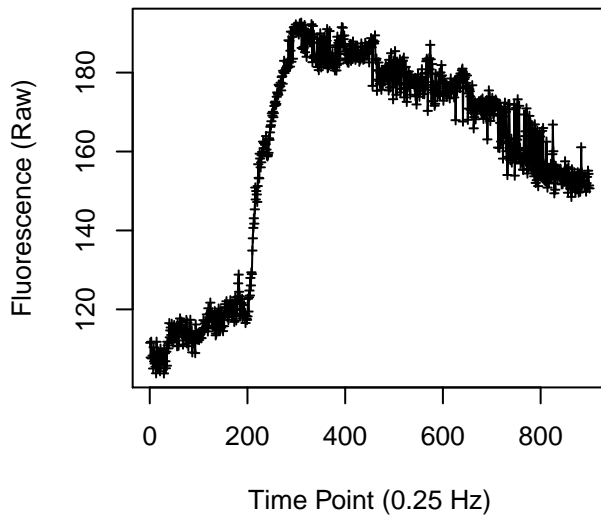

**Cell 2129**

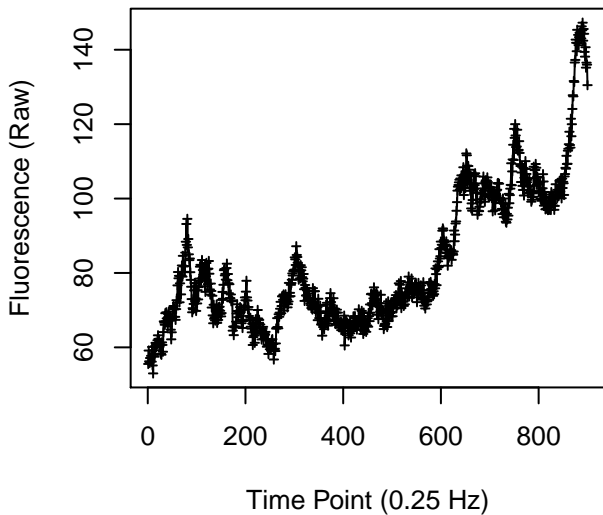

**Cell 2130**

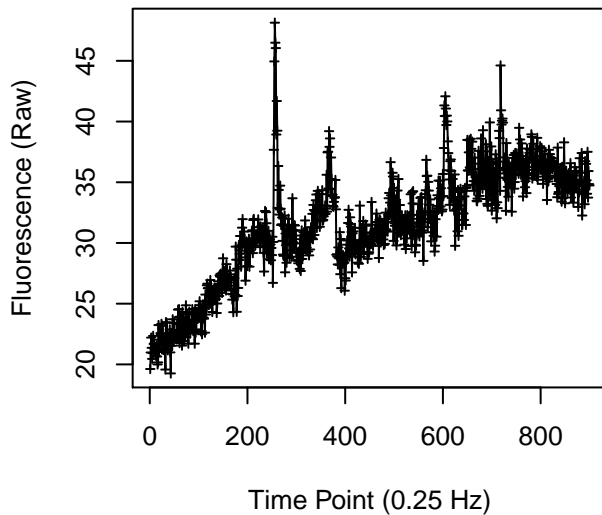

**Cell 2131**

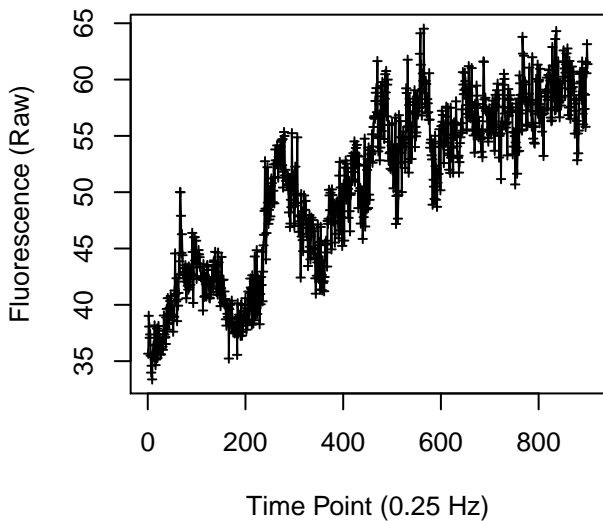

**Cell 2132**

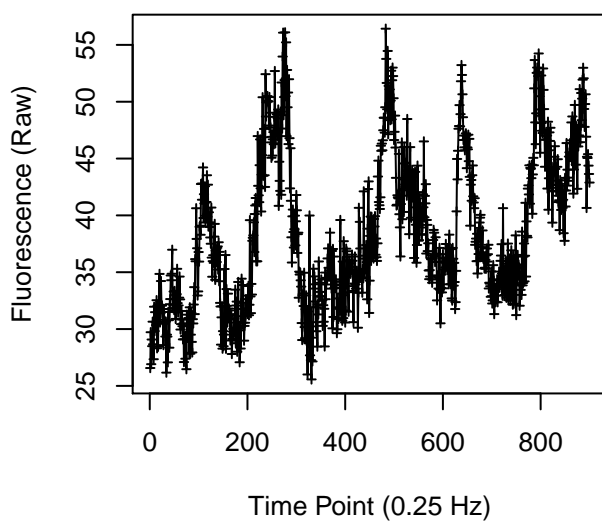

**Cell 2133**

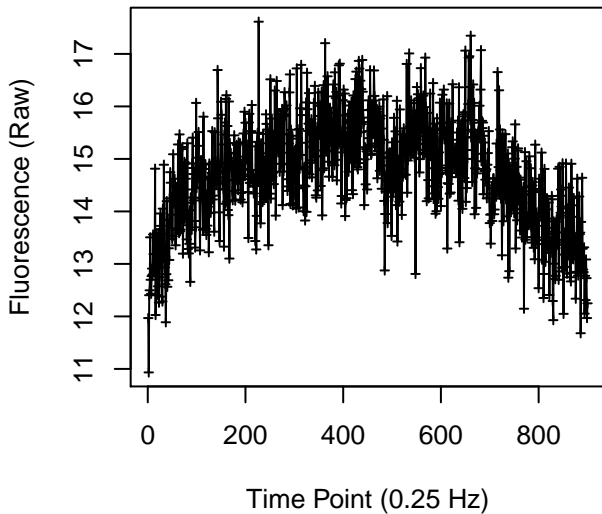

**Cell 2134**

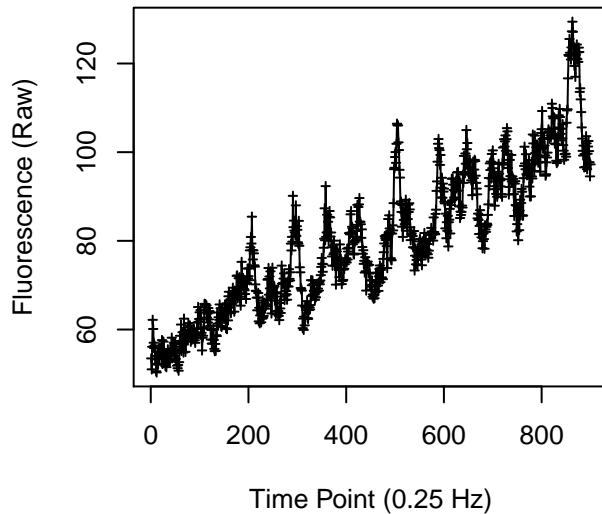

**Cell 2135**

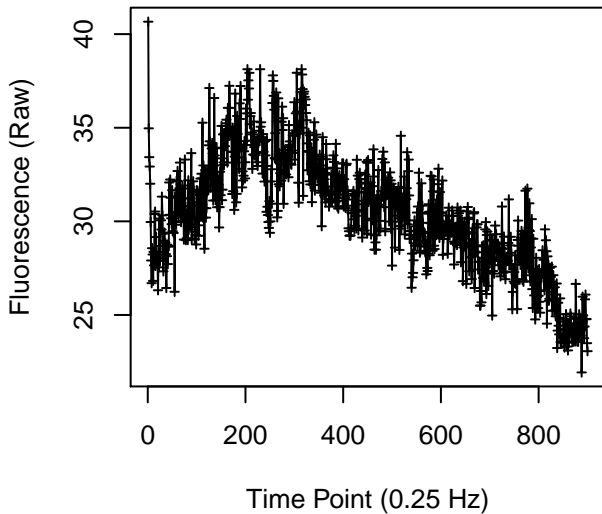

**Cell 2136**

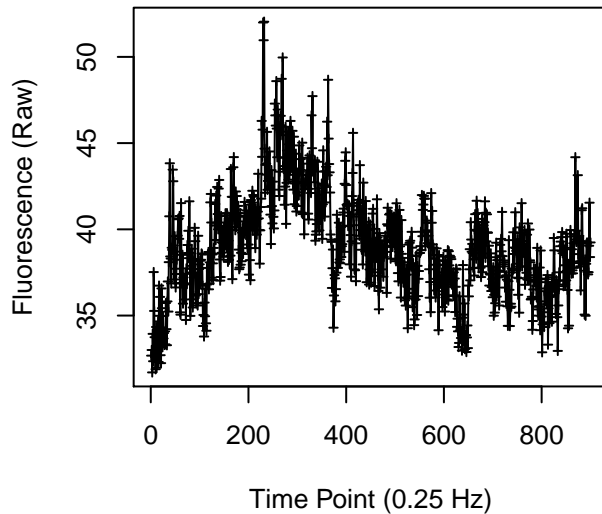

**Cell 2137**

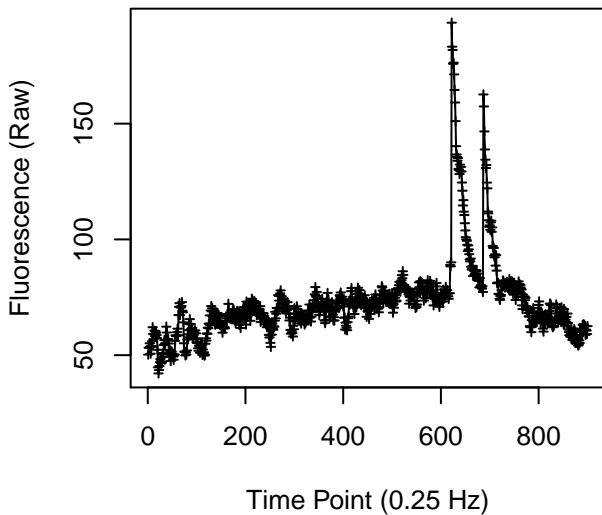

**Cell 2138**

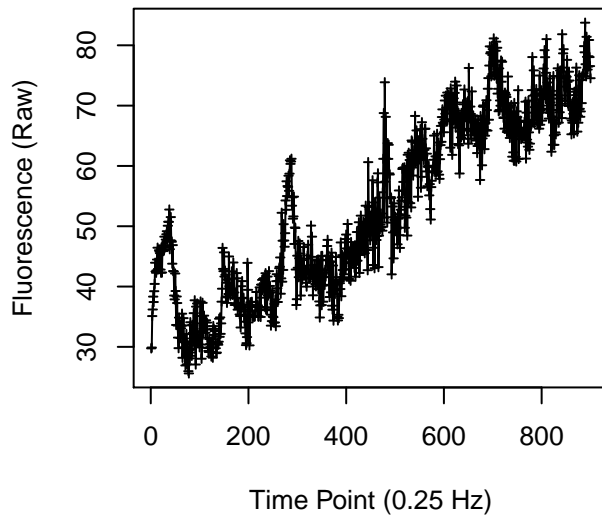

**Cell 2139**

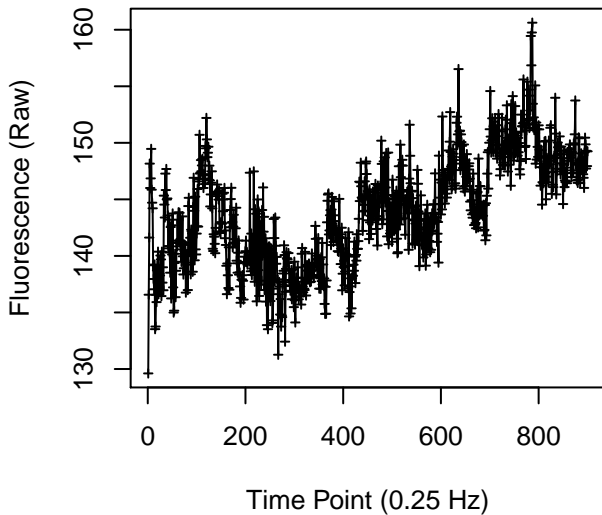

**Cell 2140**

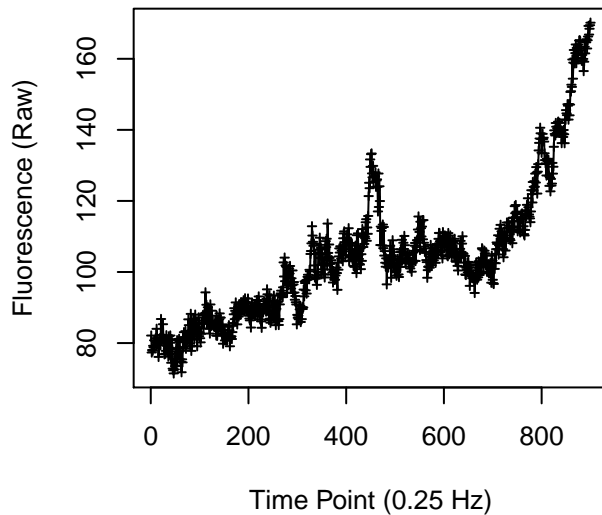

**Cell 2141**

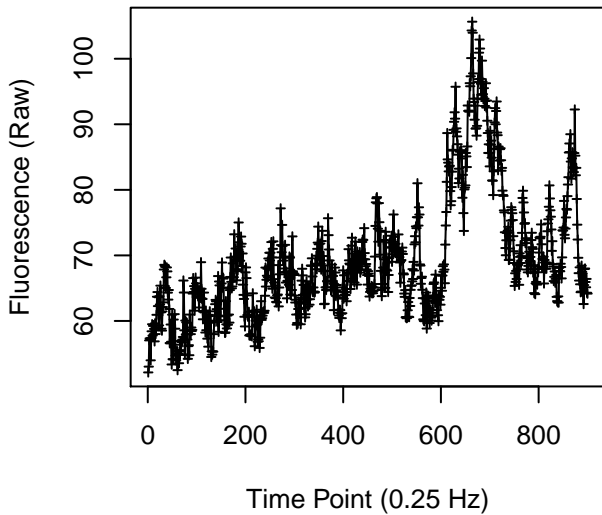

**Cell 2142**

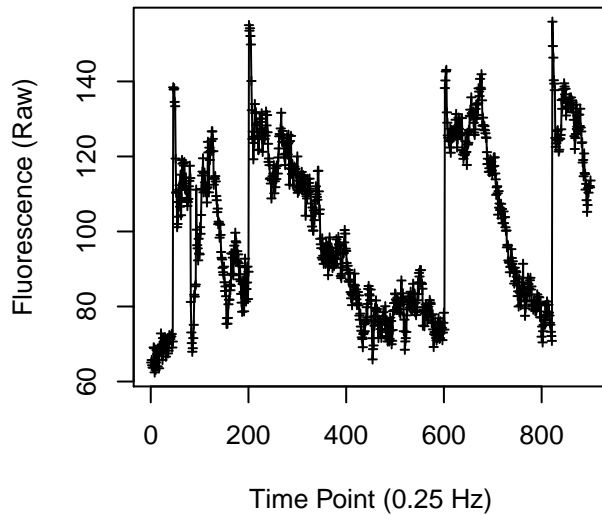

**Cell 2143**

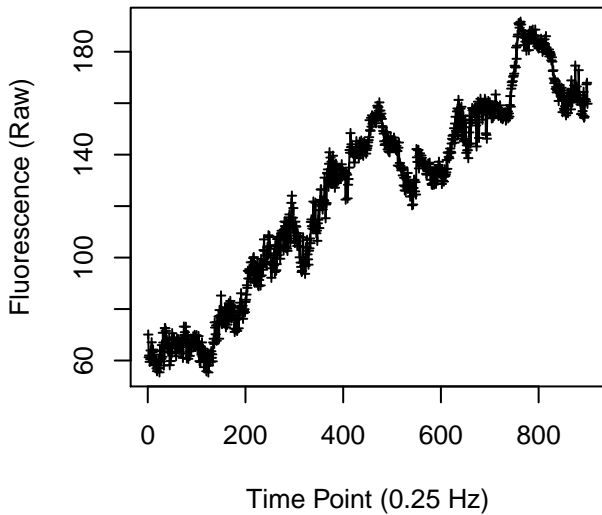

**Cell 2144**

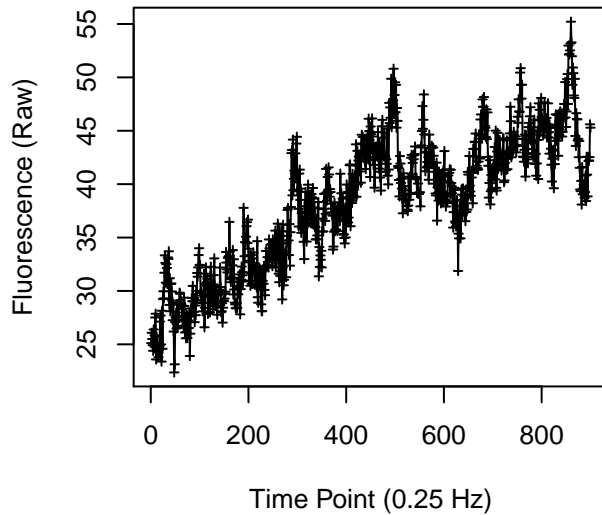

**Cell 2145**

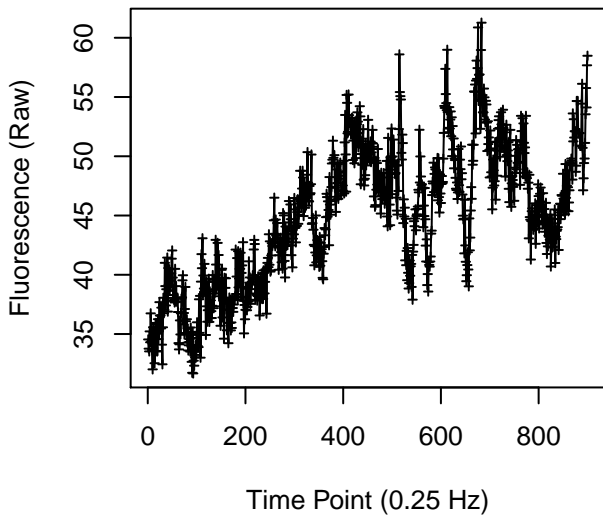

**Cell 2146**

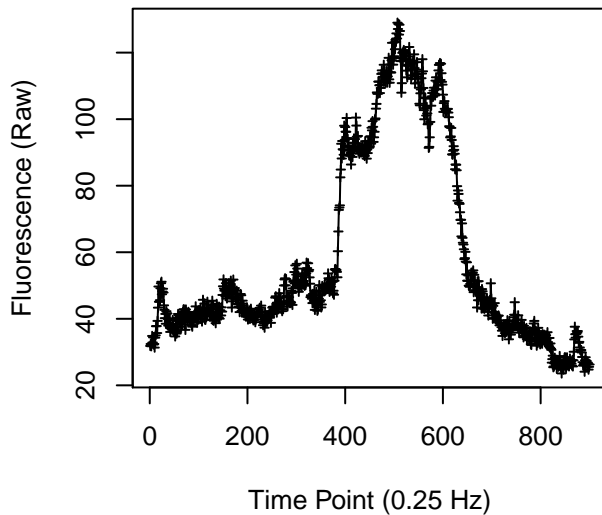

**Cell 2147**

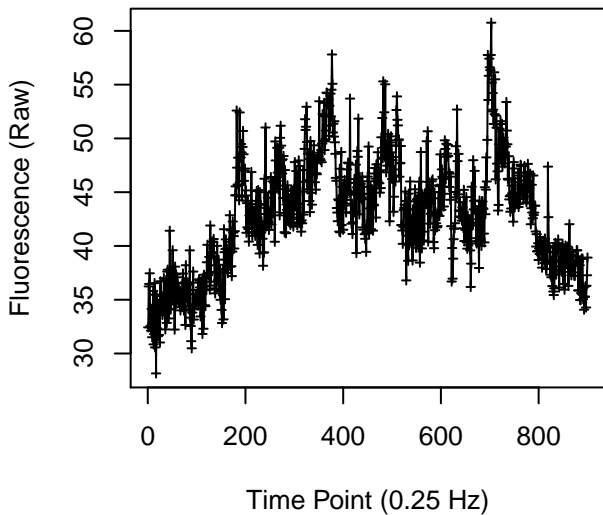

**Cell 2148**

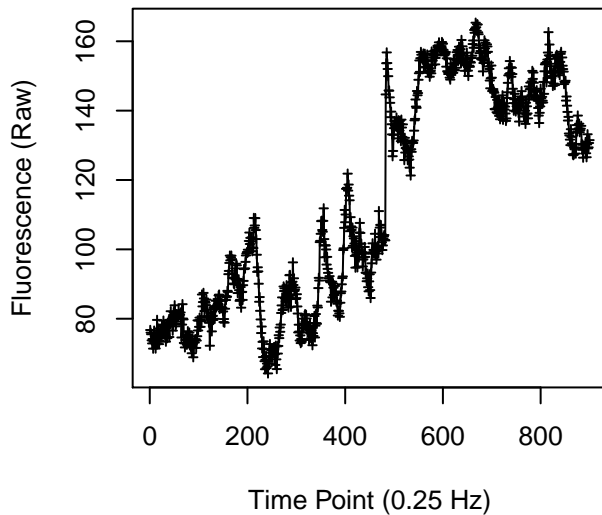

**Cell 2149**

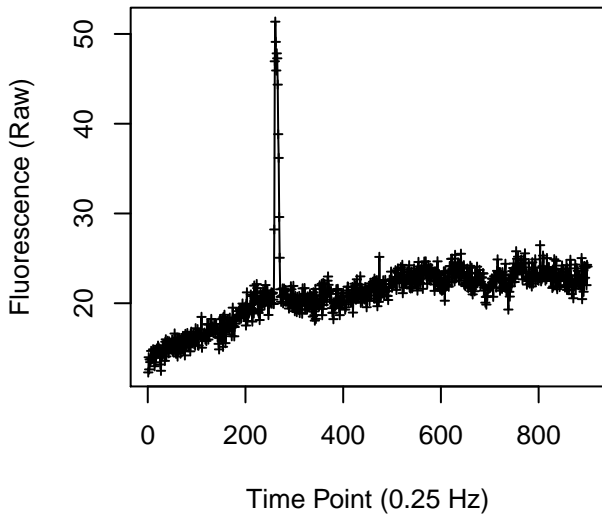

**Cell 2150**

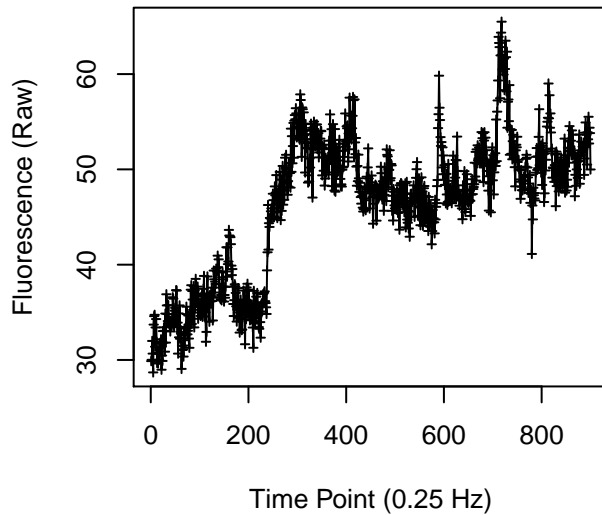

**Cell 2151**

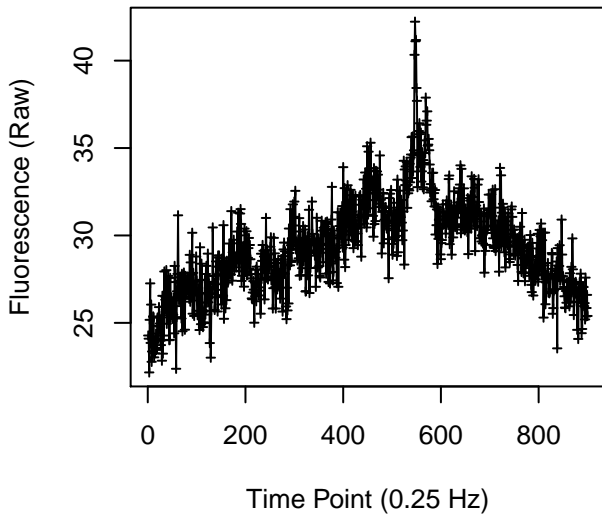

**Cell 2152**

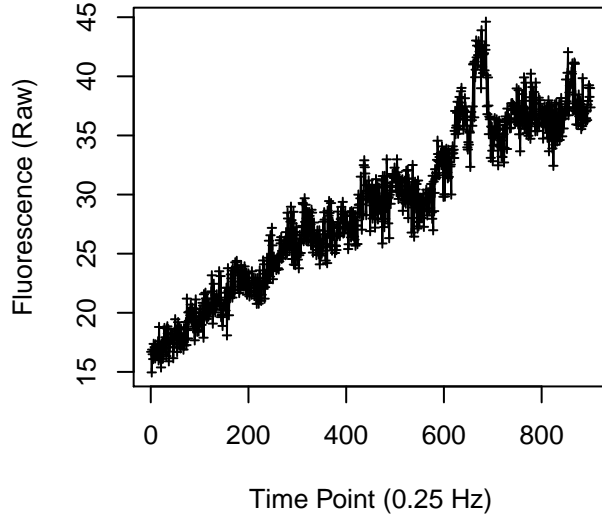



**Cell 2153**

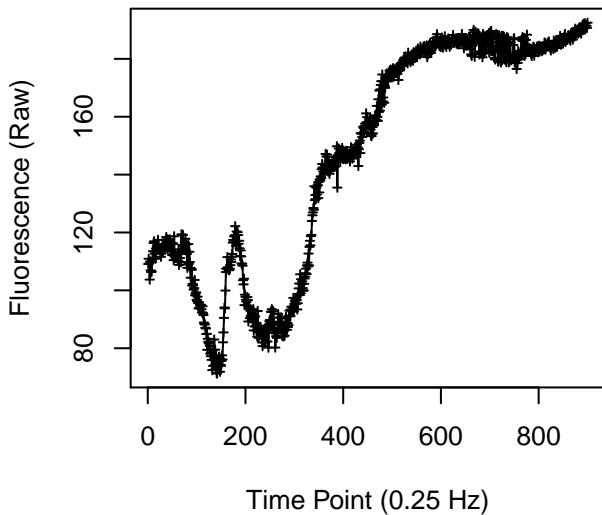

**Cell 2154**

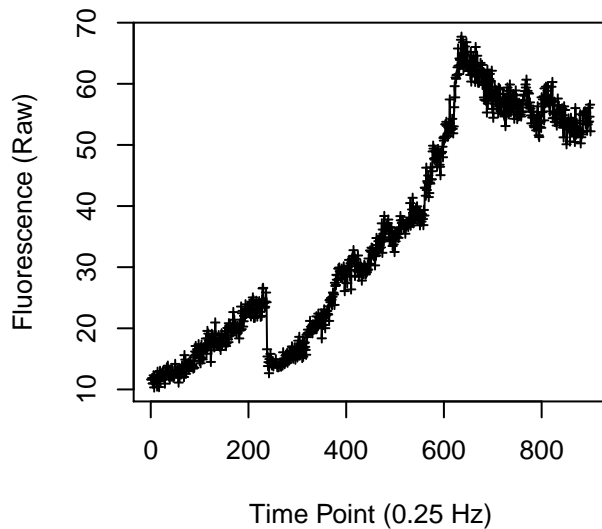

**Cell 2155**

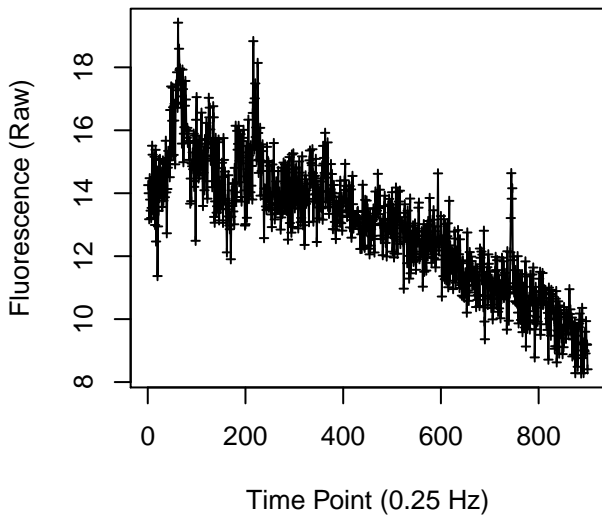

**Cell 2156**

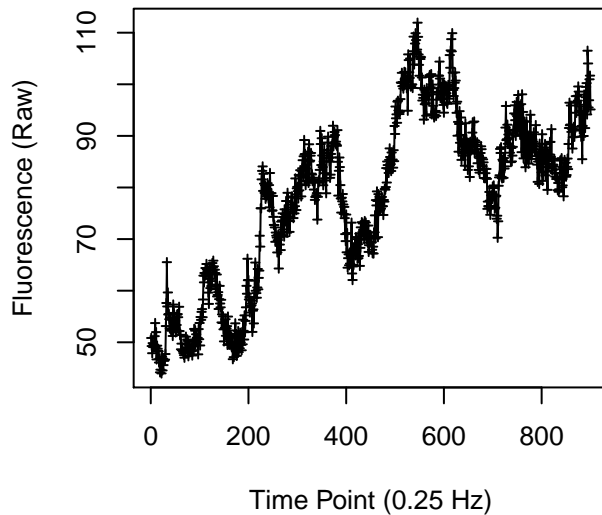

**Cell 2157**

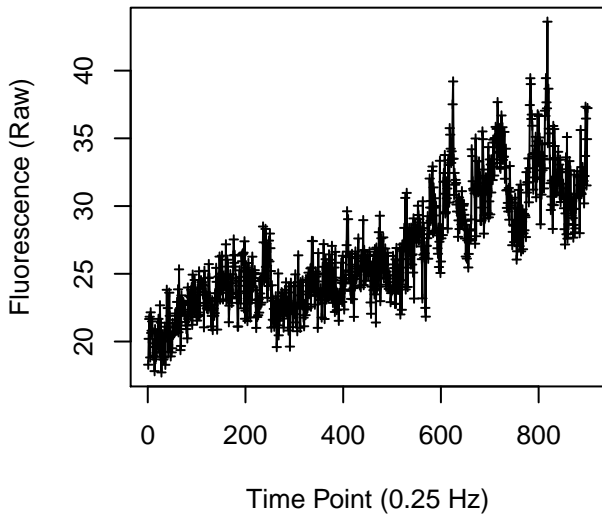

**Cell 2158**

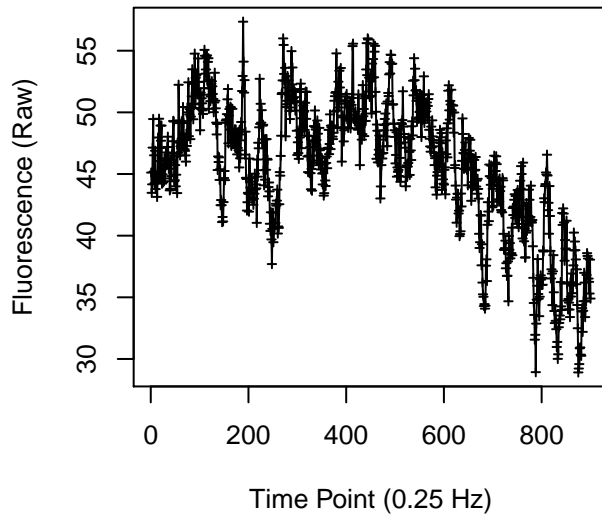

**Cell 2159**

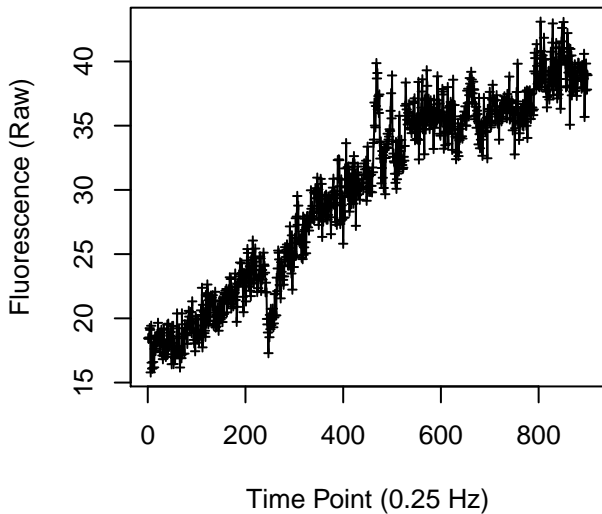

**Cell 2160**

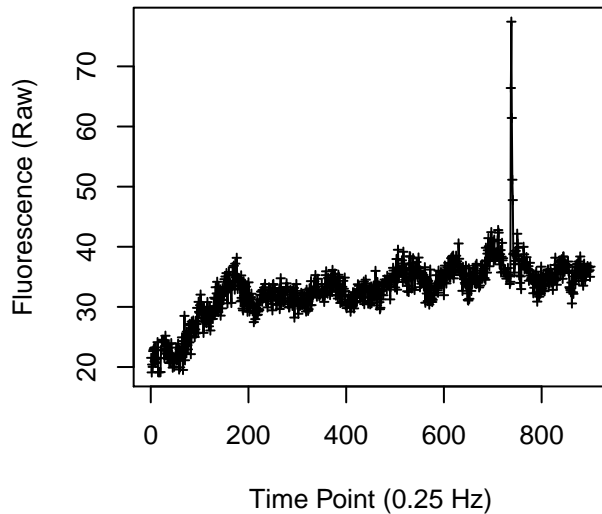

**Cell 2161**

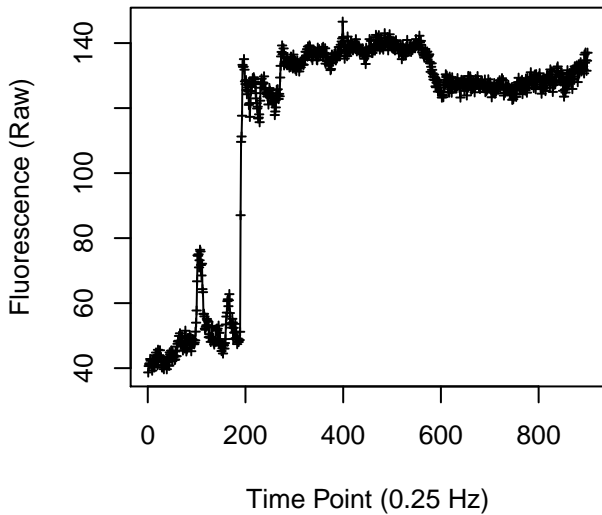

**Cell 2162**

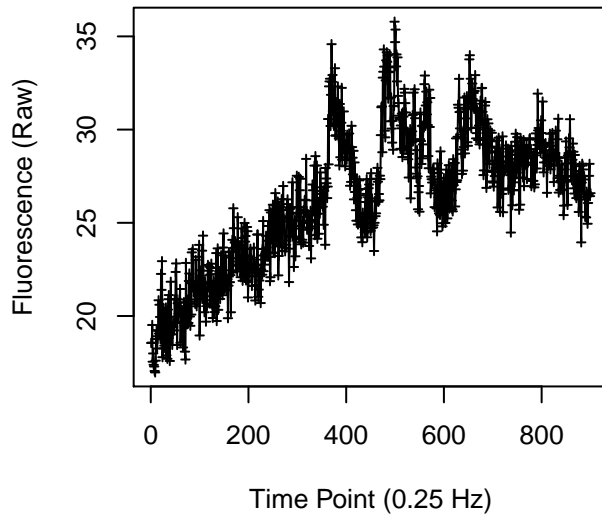

**Cell 2163**

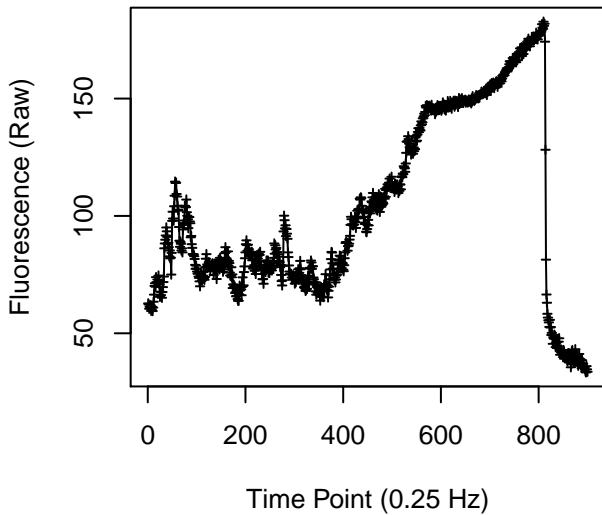

**Cell 2164**

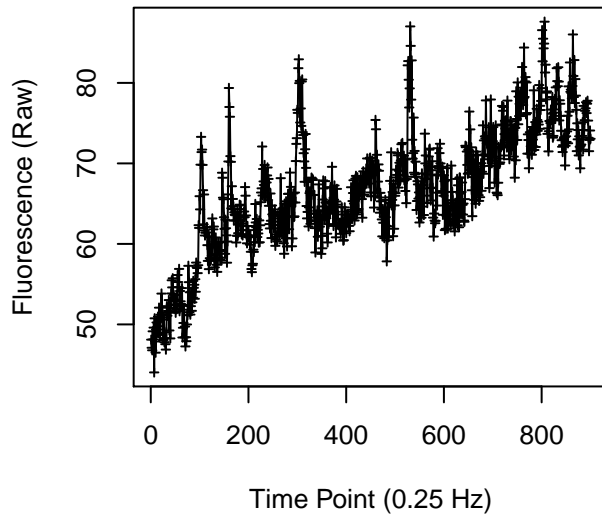

**Cell 2165**

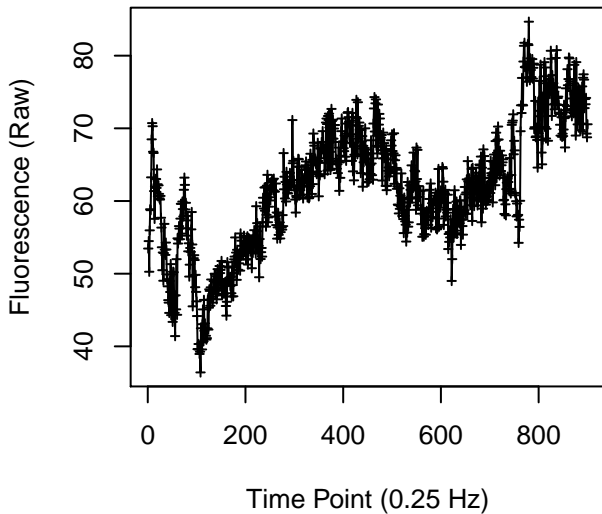

**Cell 2166**

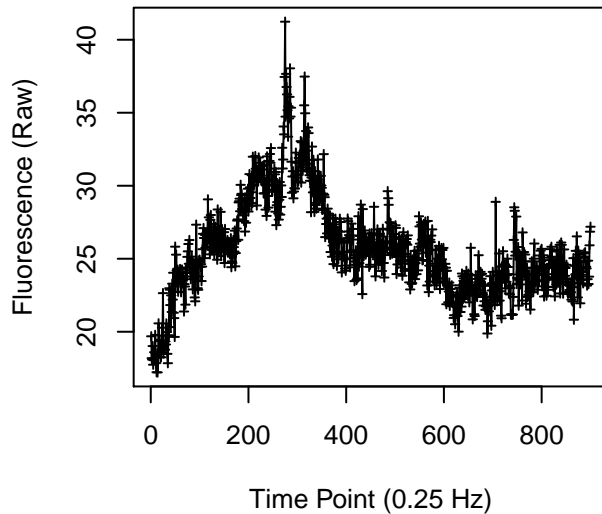

**Cell 2167**

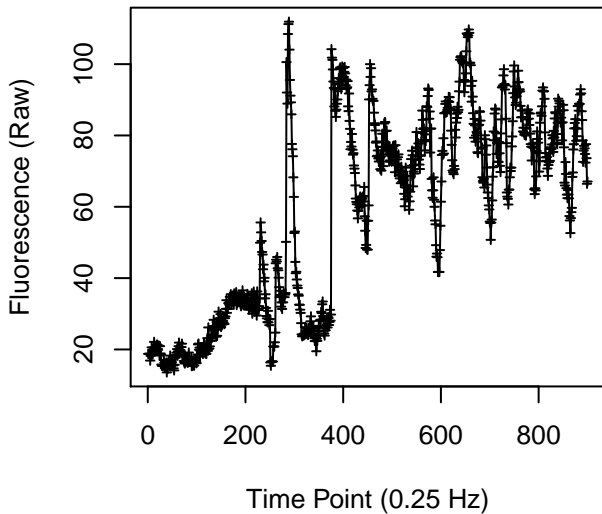

**Cell 2168**

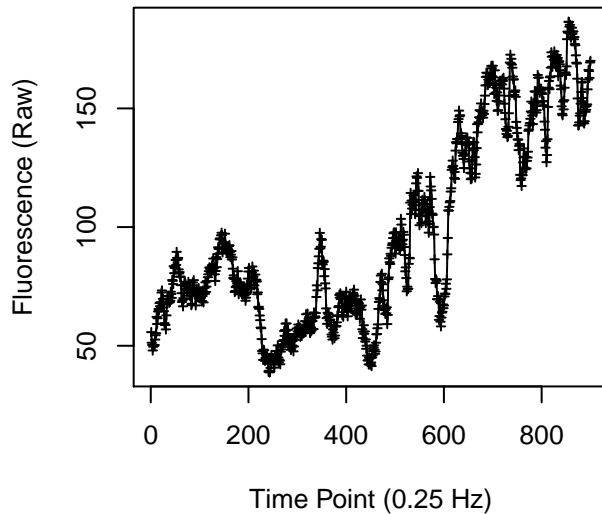

**Cell 2169**

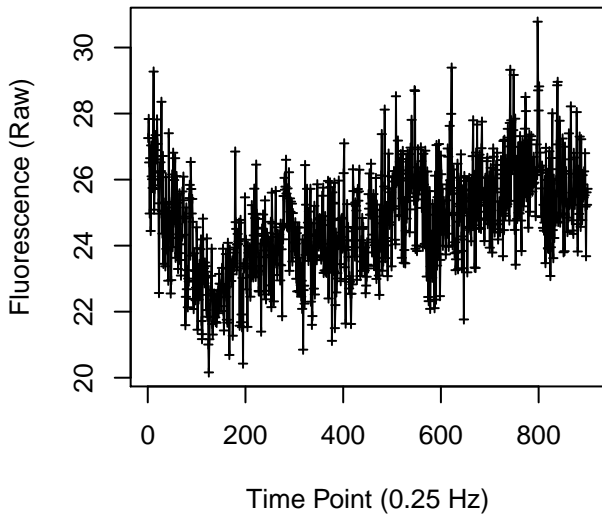

**Cell 2170**

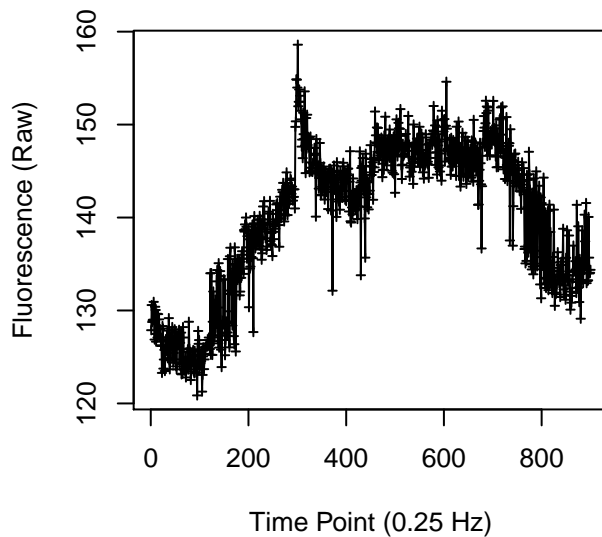

**Cell 2171**

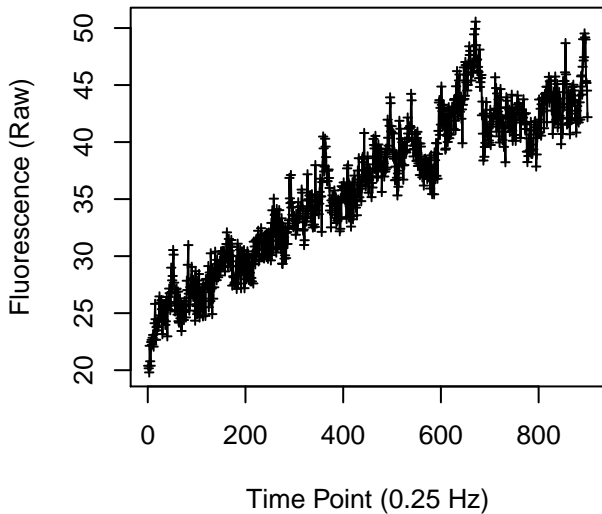

**Cell 2172**

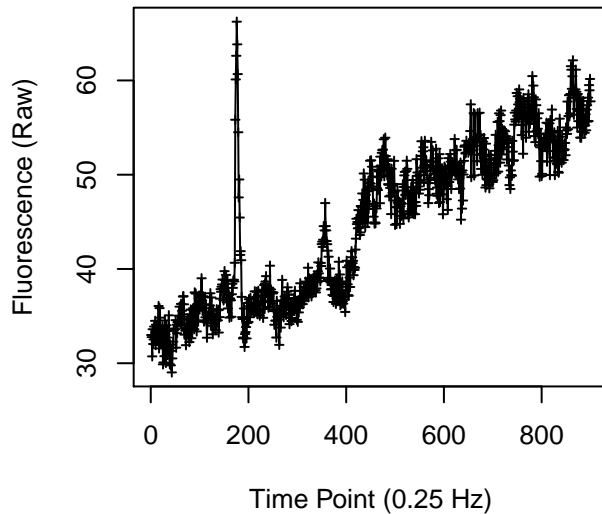

**Cell 2173**

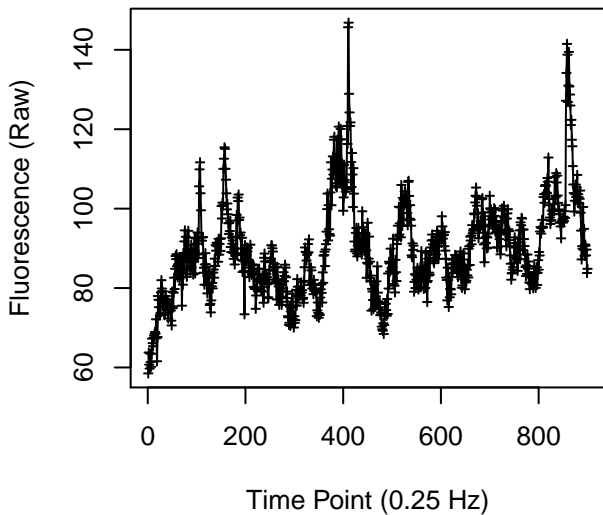

**Cell 2174**

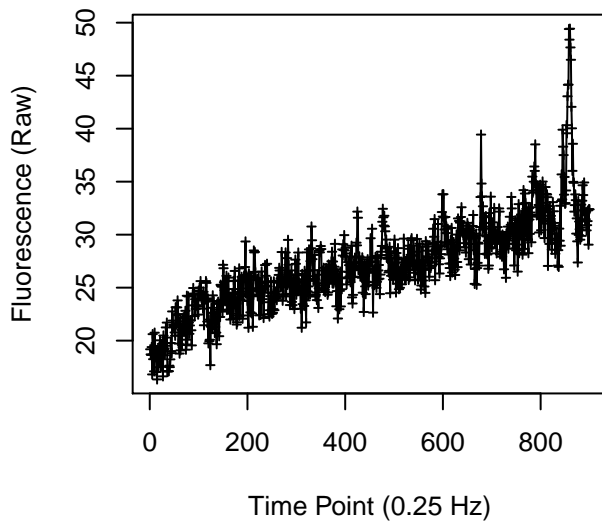

**Cell 2175**

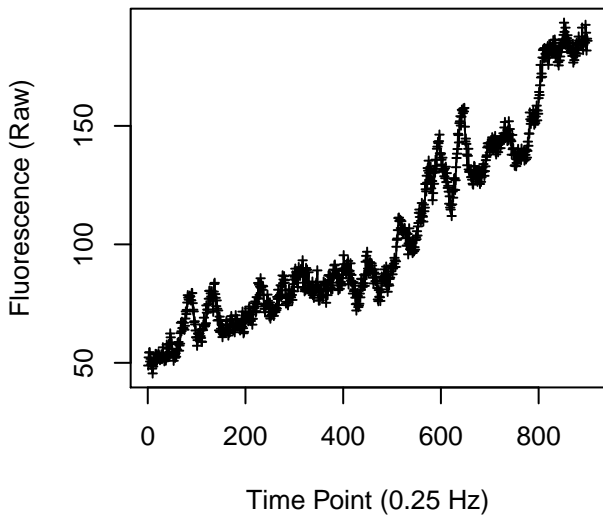

**Cell 2176**

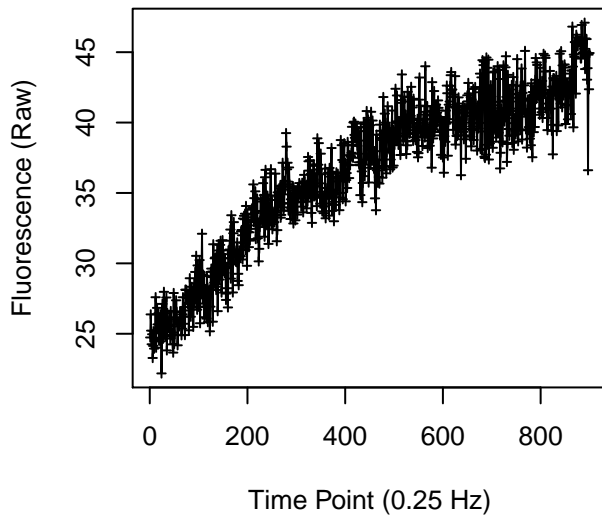

**Cell 2177**

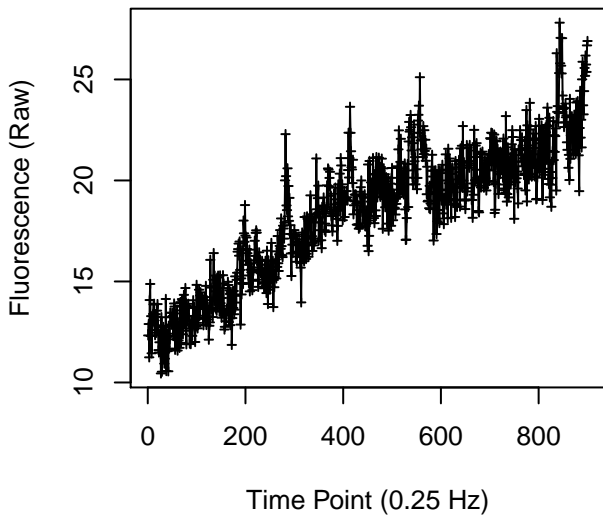

**Cell 2178**

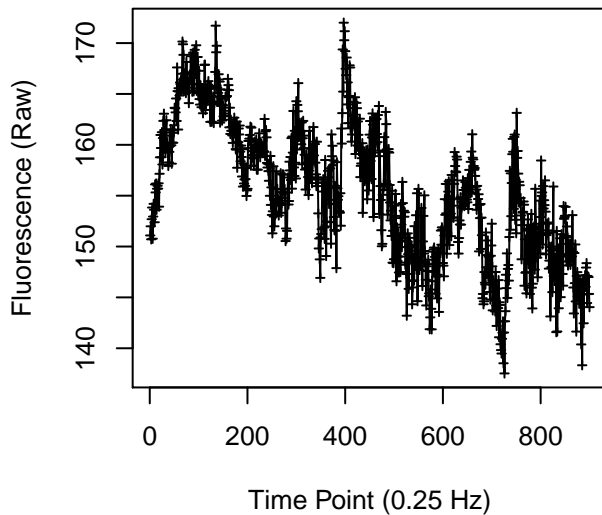

**Cell 2179**

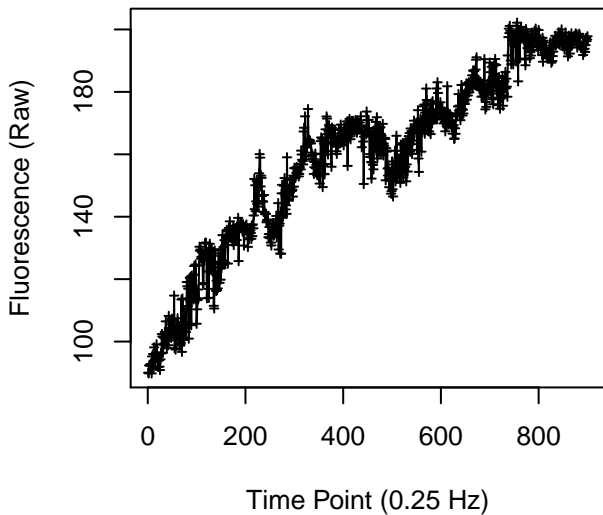

**Cell 2180**

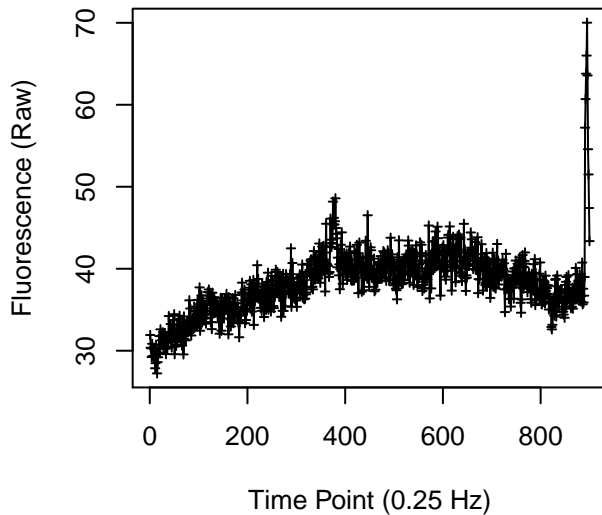

**Cell 2181**

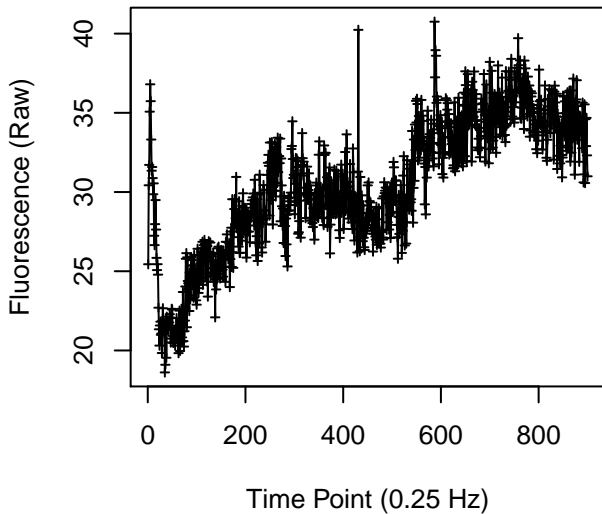

**Cell 2182**

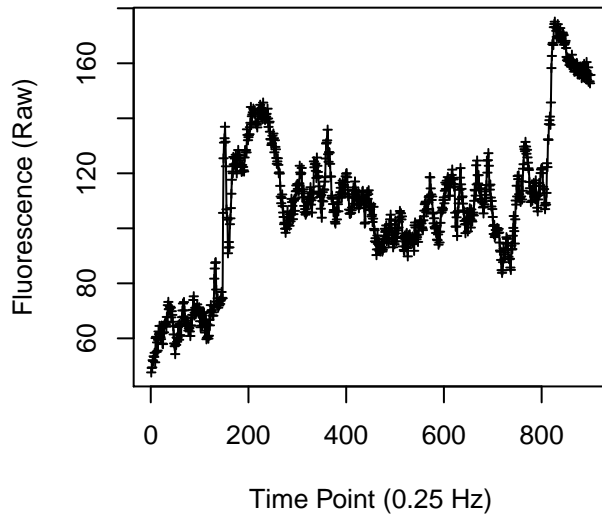

**Cell 2183**

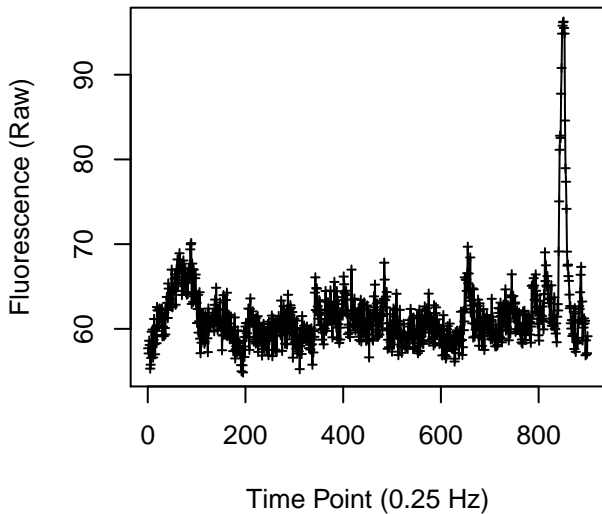

**Cell 2184**

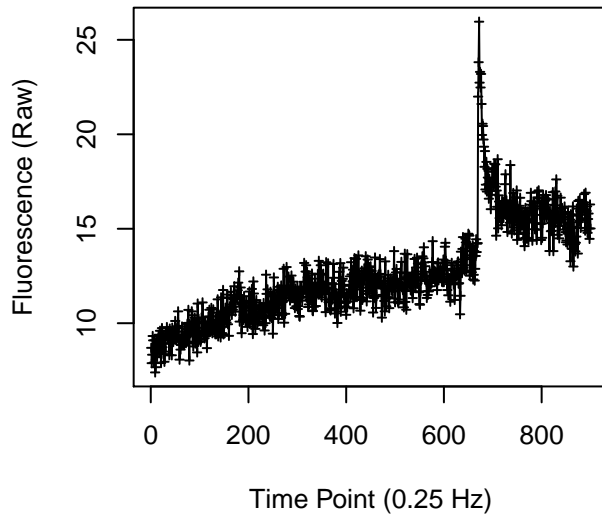



**Cell 2185**

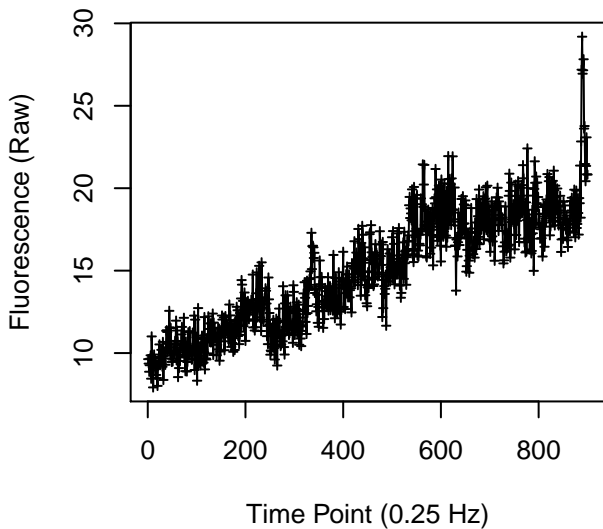

**Cell 2186**

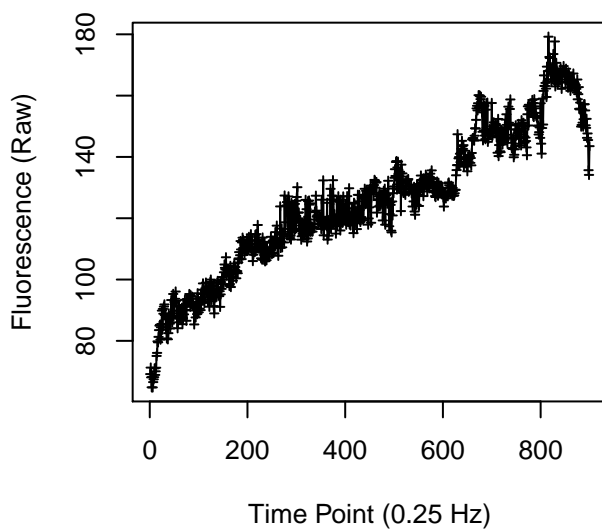

**Cell 2187**

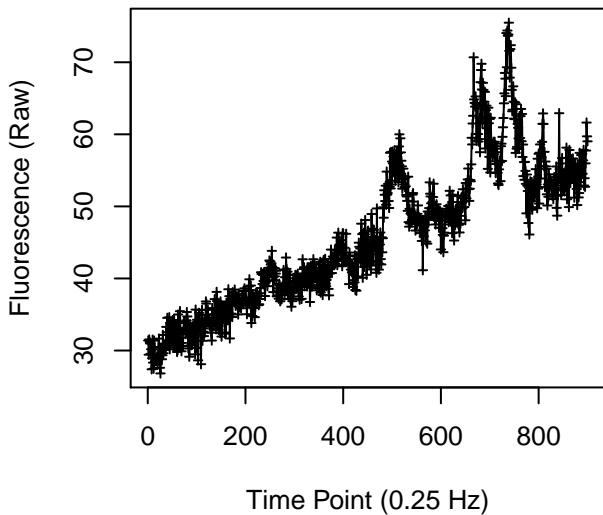

**Cell 2188**

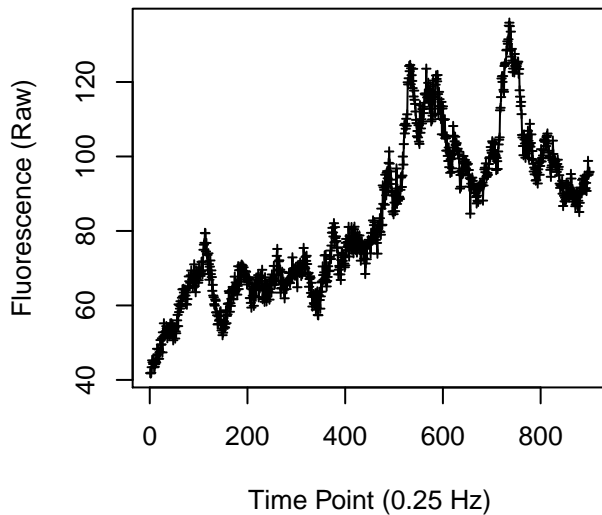

**Cell 2189**

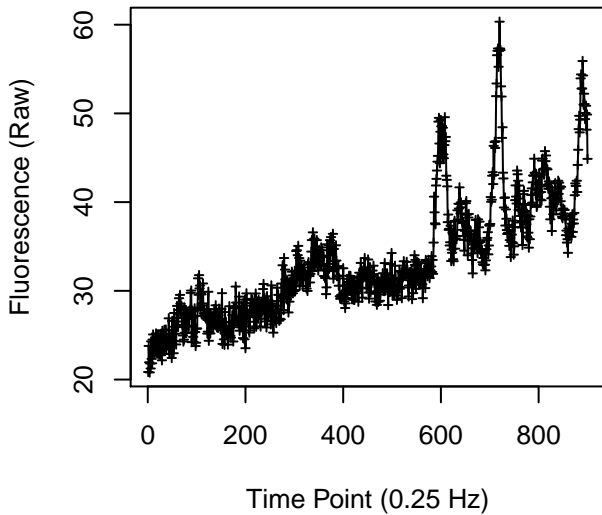

**Cell 2190**

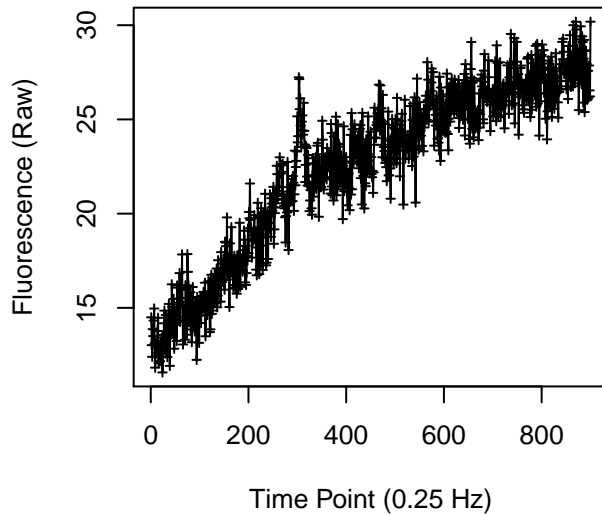

**Cell 2191**

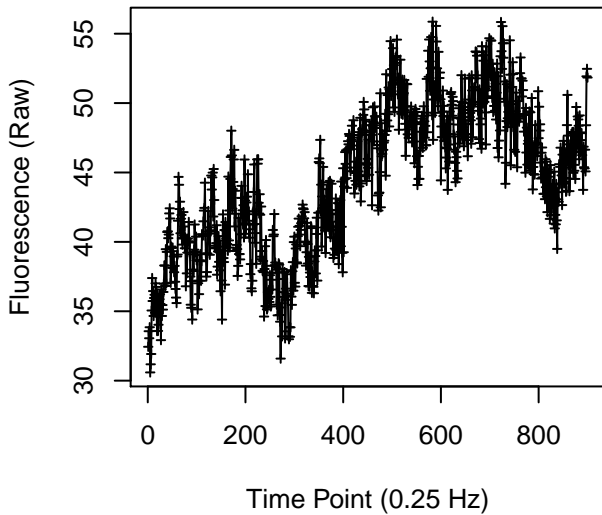

**Cell 2192**

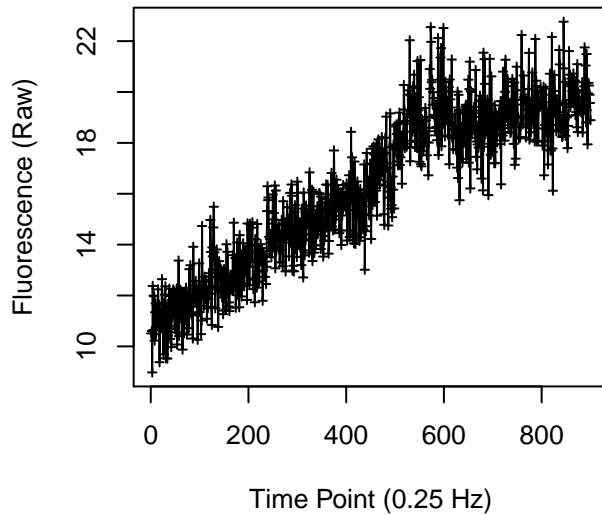

**Cell 2193**

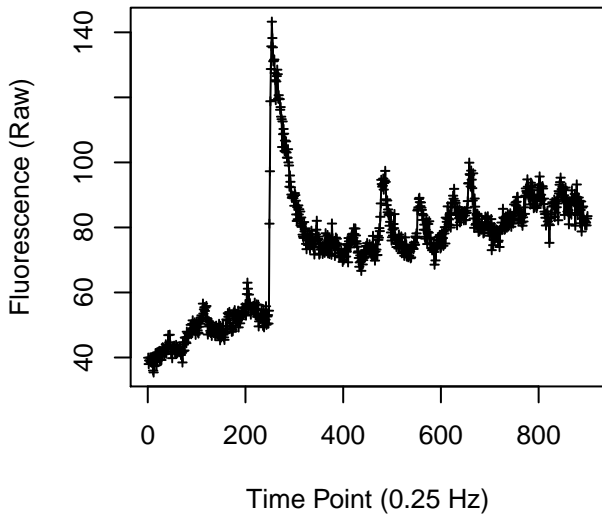

**Cell 2194**

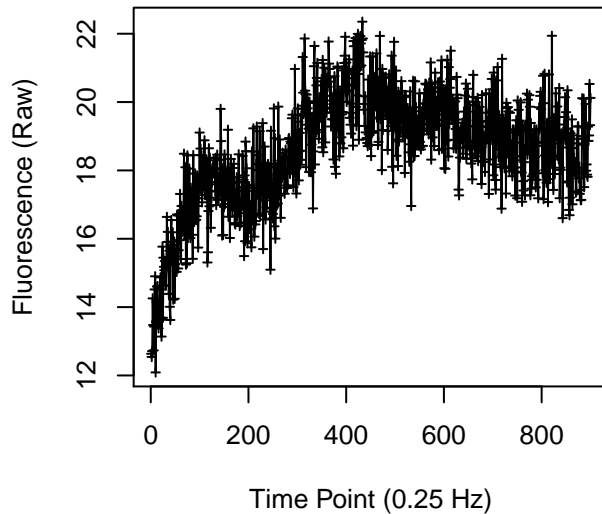

**Cell 2195**

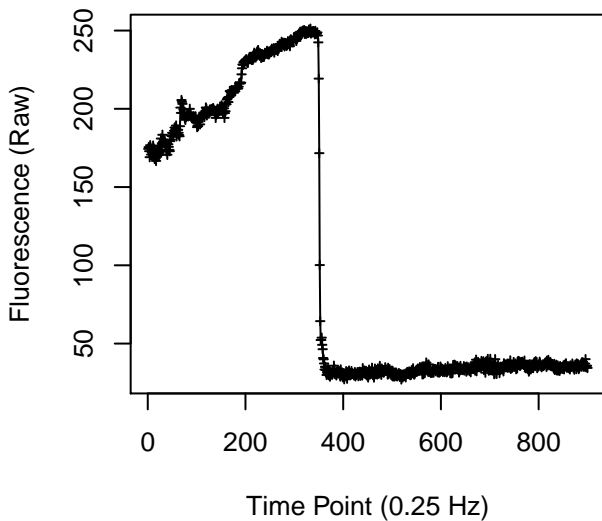

**Cell 2196**

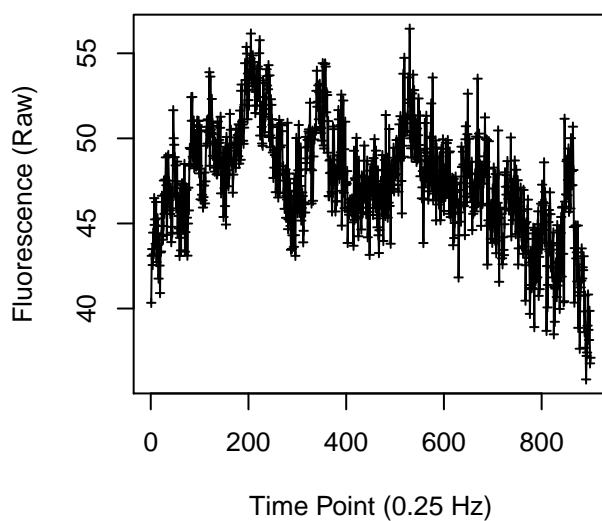

**Cell 2197**

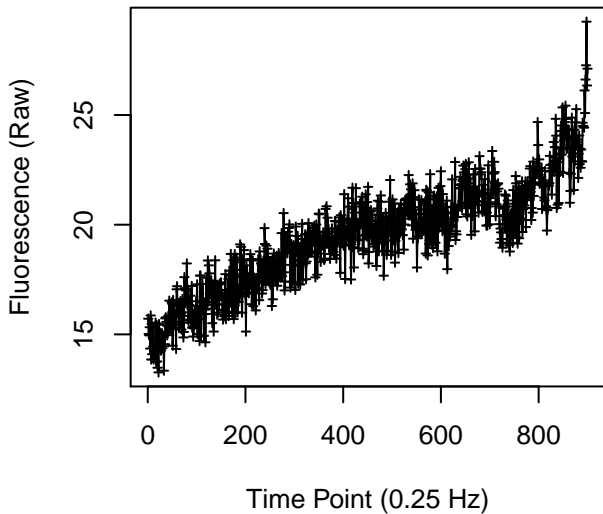

**Cell 2198**

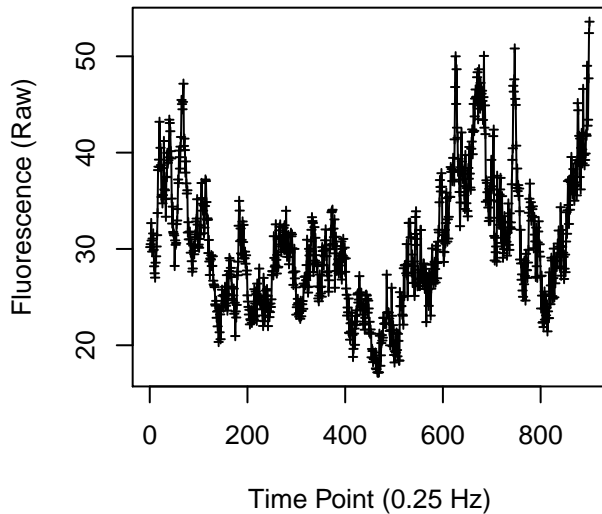

**Cell 2199**

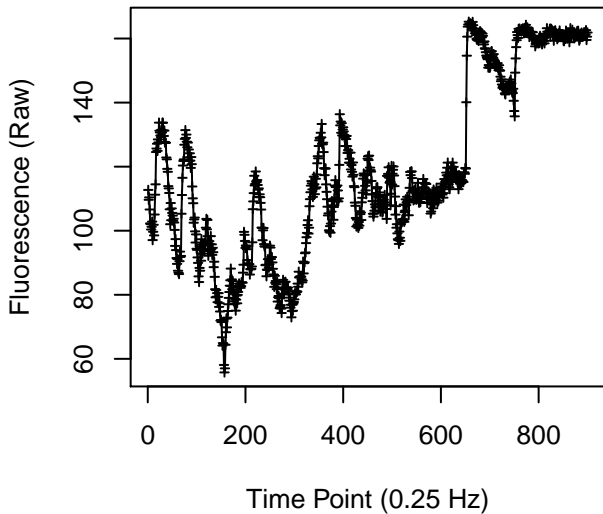

**Cell 2200**

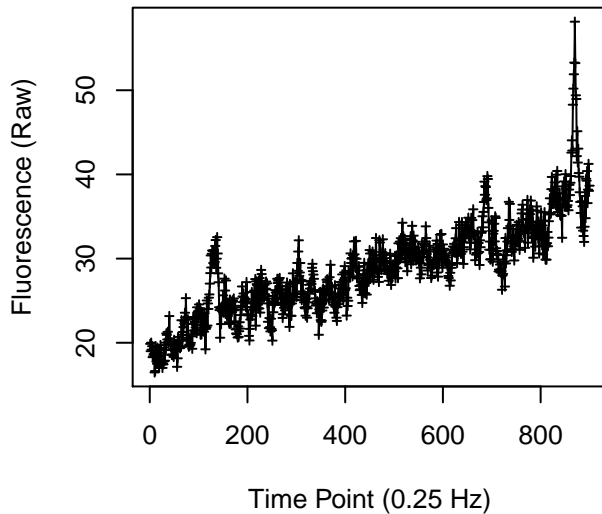

**Cell 2201**

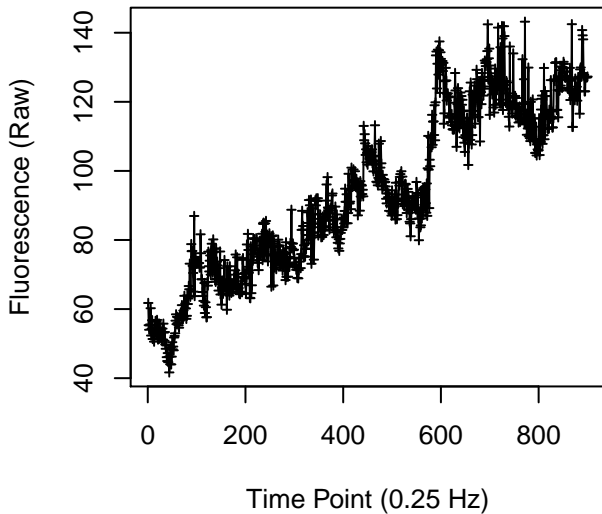

**Cell 2202**

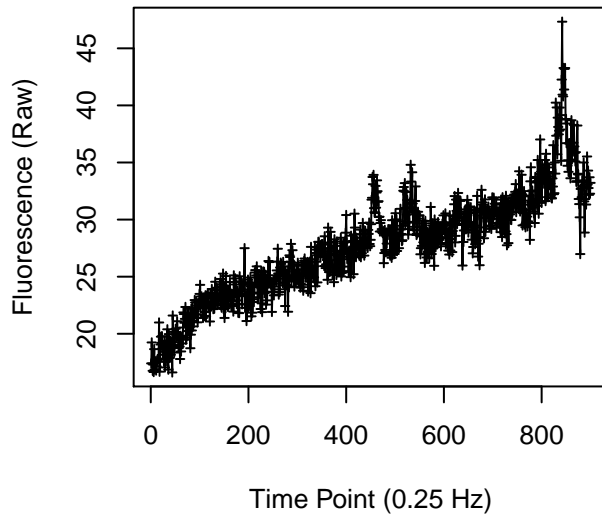

**Cell 2203**

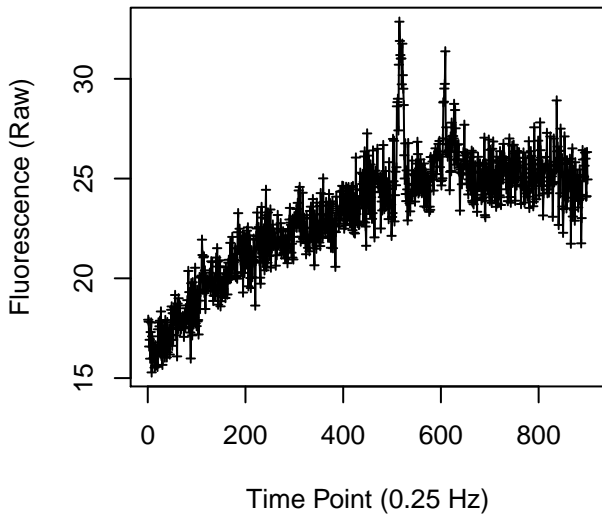

**Cell 2204**

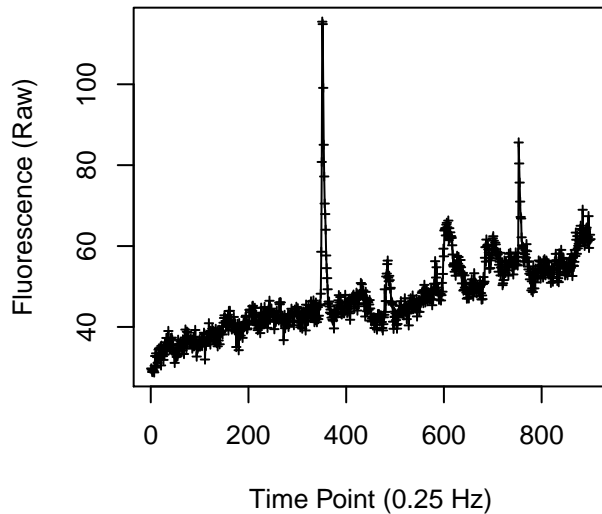

**Cell 2205**

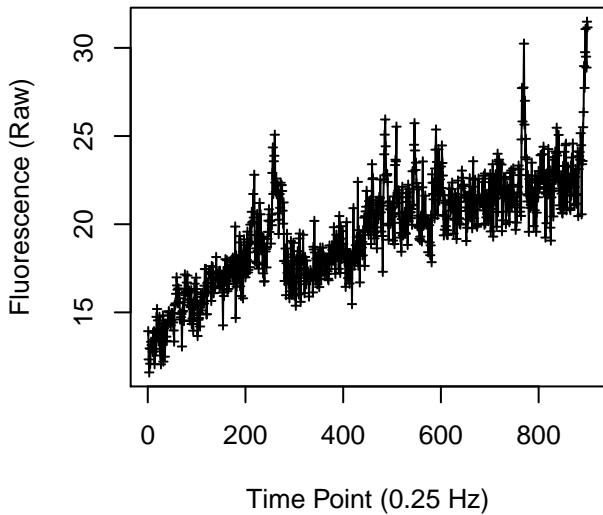

**Cell 2206**

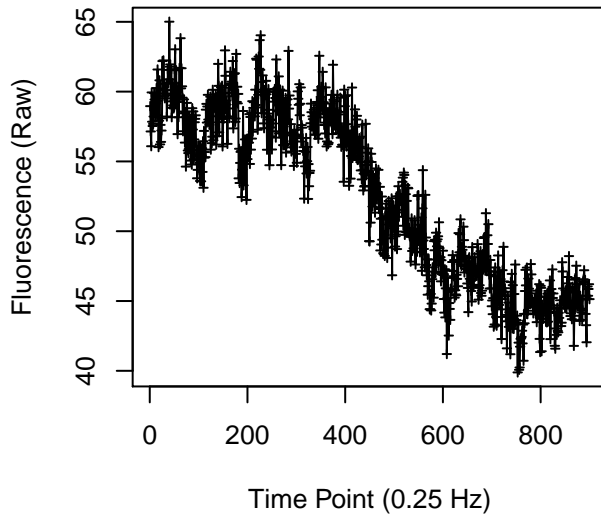

**Cell 2207**

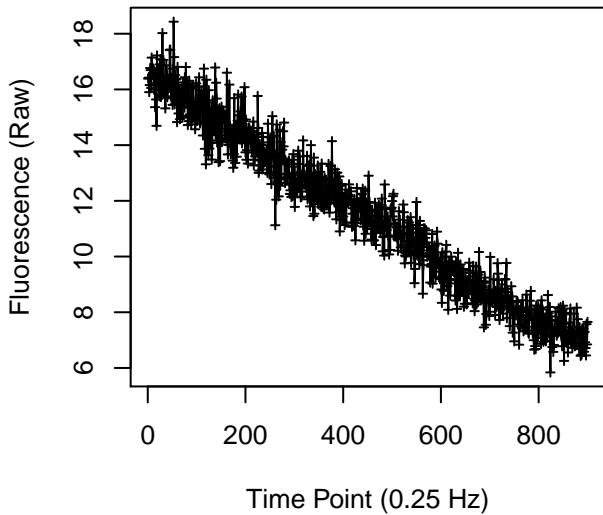

**Cell 2208**

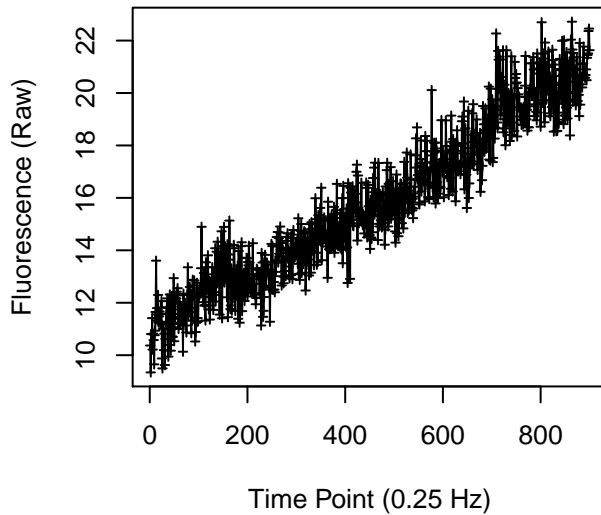

**Cell 2209**

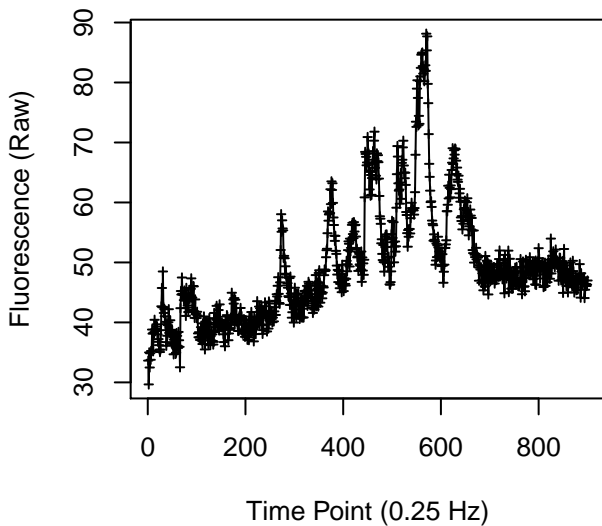

**Cell 2210**

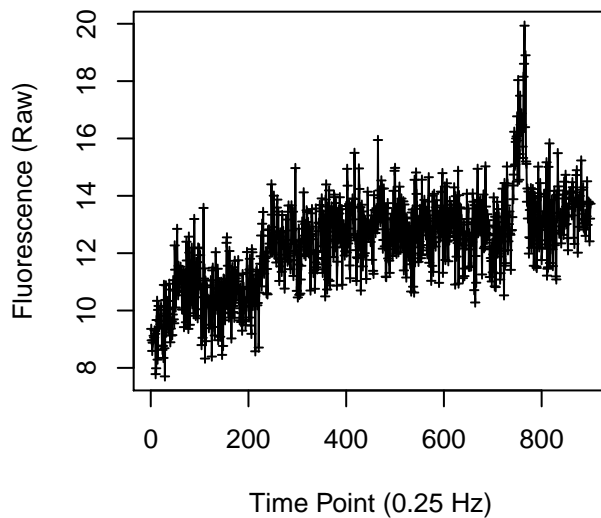

**Cell 2211**

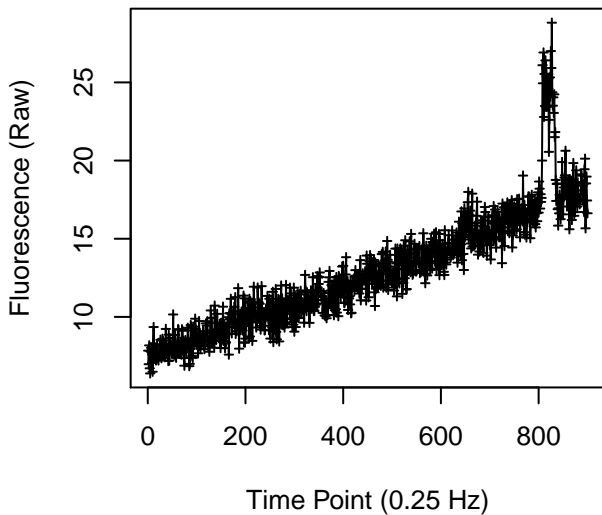

**Cell 2212**

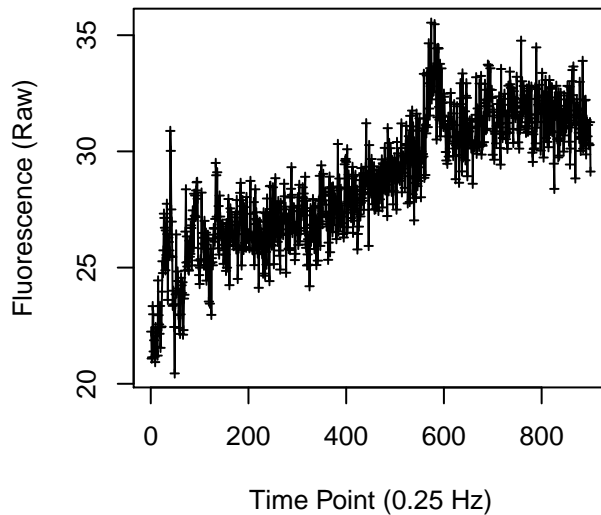

**Cell 2213**

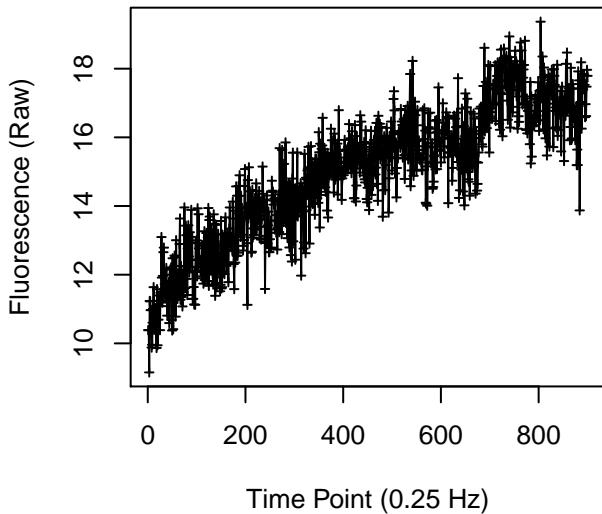

**Cell 2214**

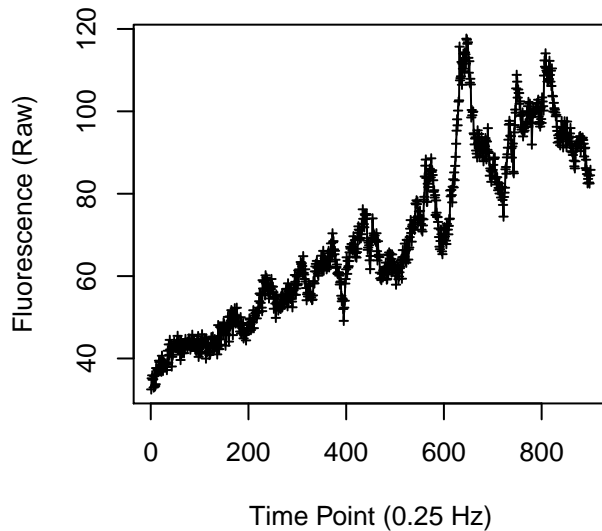

**Cell 2215**

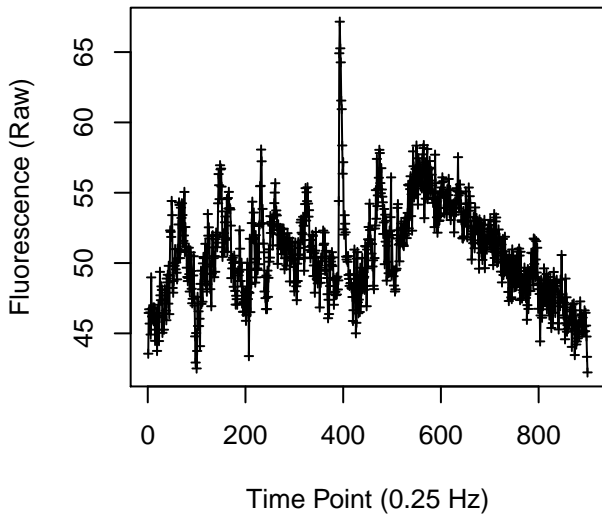

**Cell 2216**

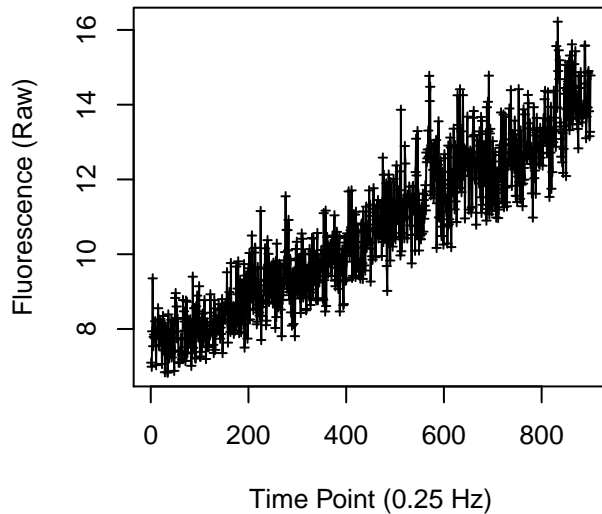



**Cell 2217**

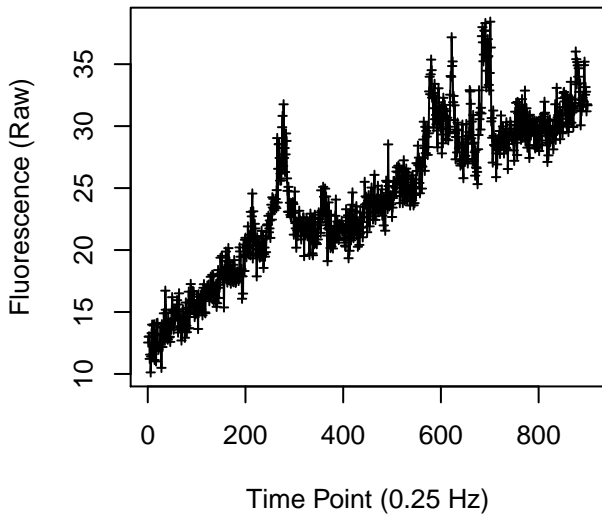

**Cell 2218**

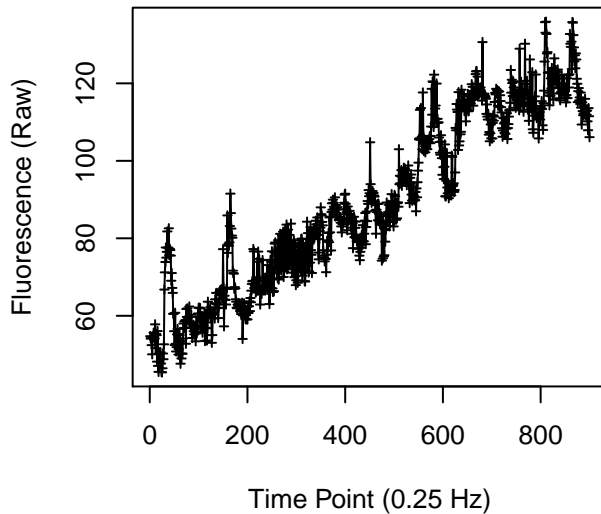

**Cell 2219**

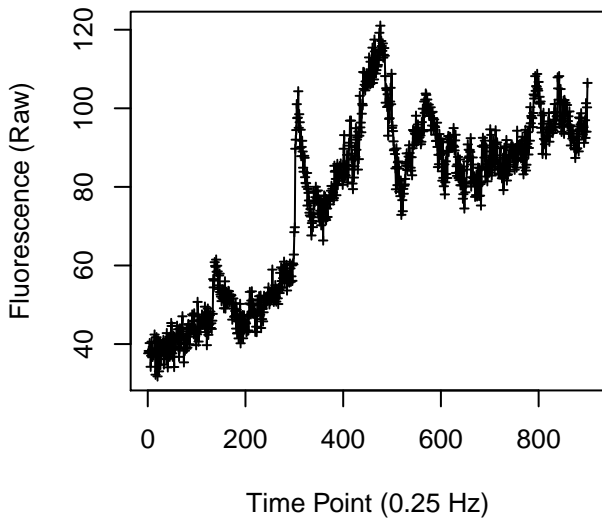

**Cell 2220**

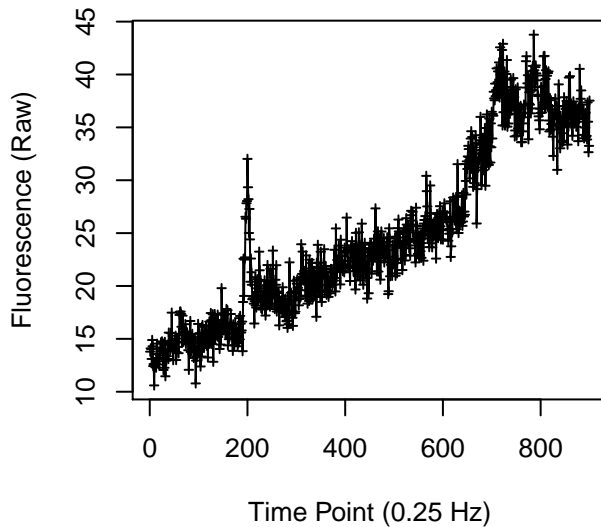

**Cell 2221**

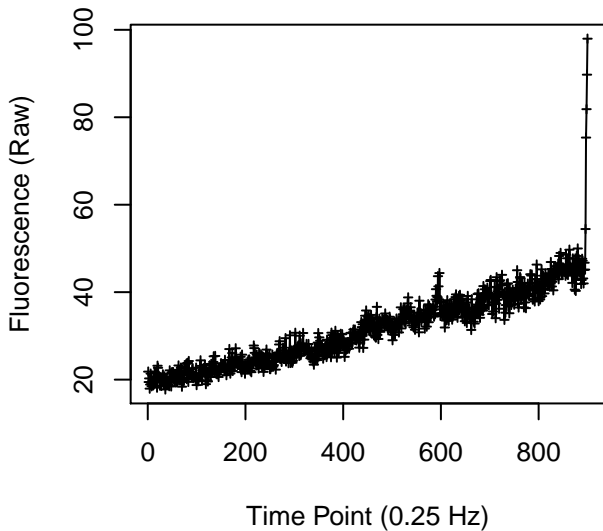

**Cell 2222**

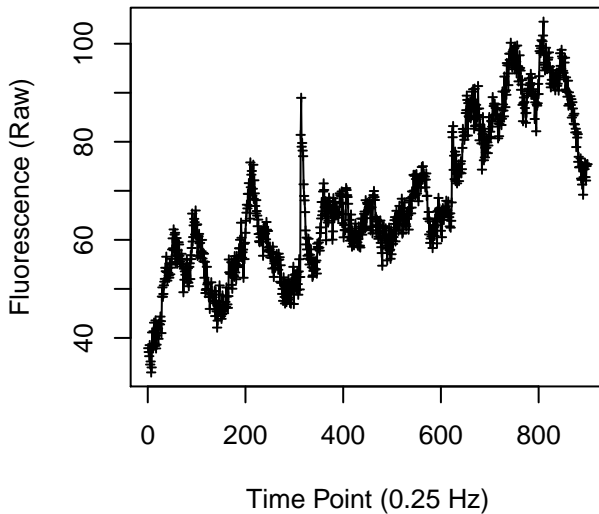

**Cell 2223**

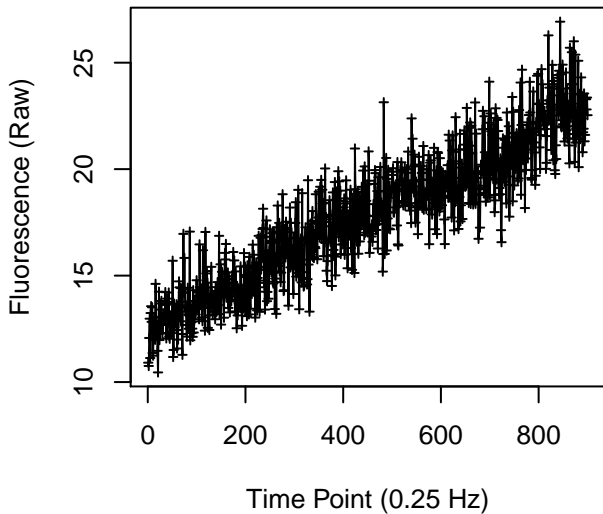

**Cell 2224**

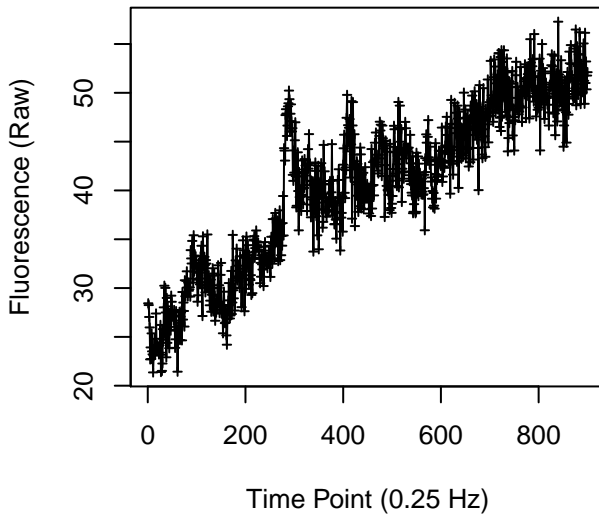

**Cell 2225**

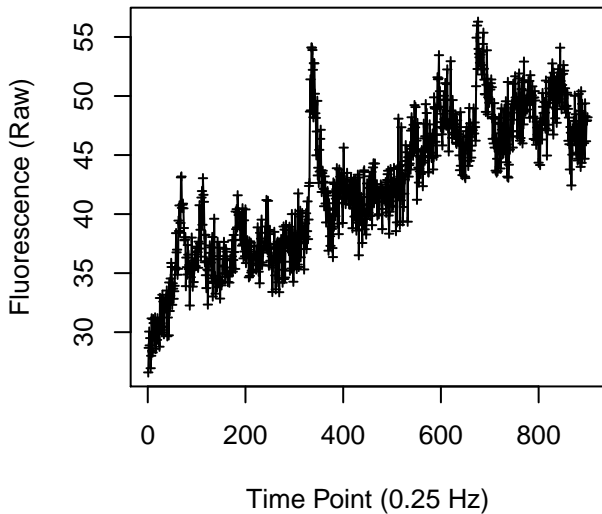

**Cell 2226**

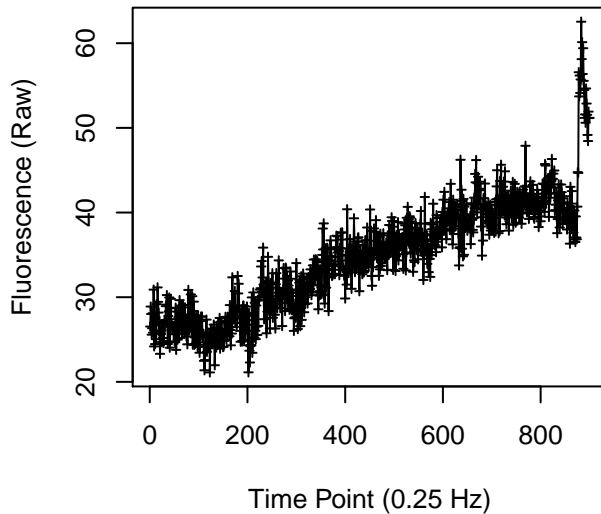

**Cell 2227**

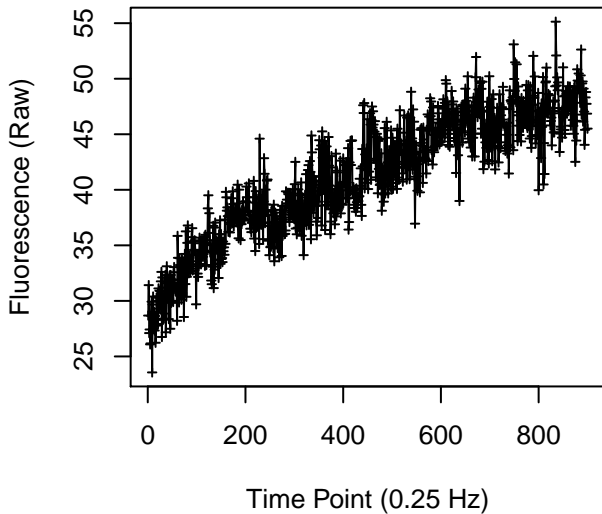

**Cell 2228**

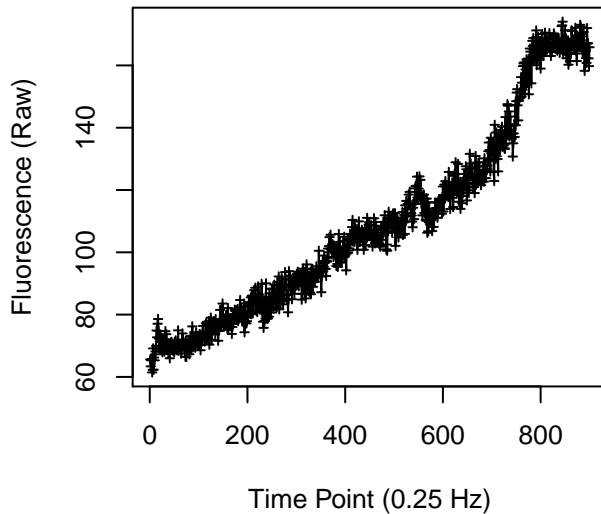

**Cell 2229**

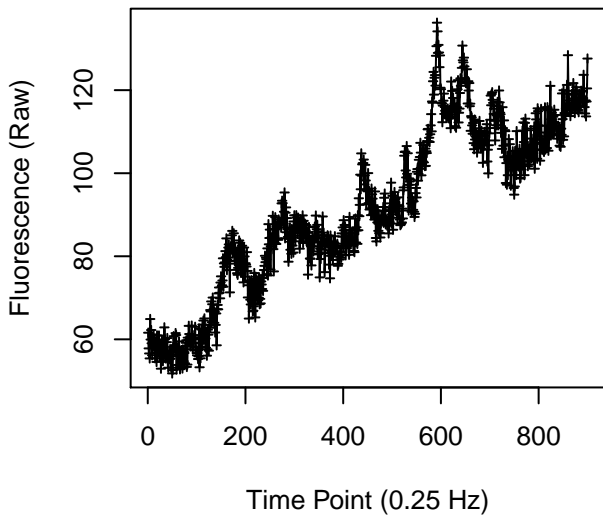

**Cell 2230**

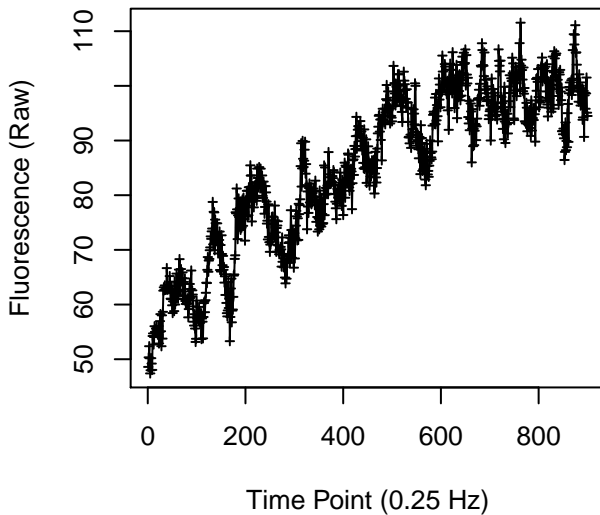

**Cell 2231**

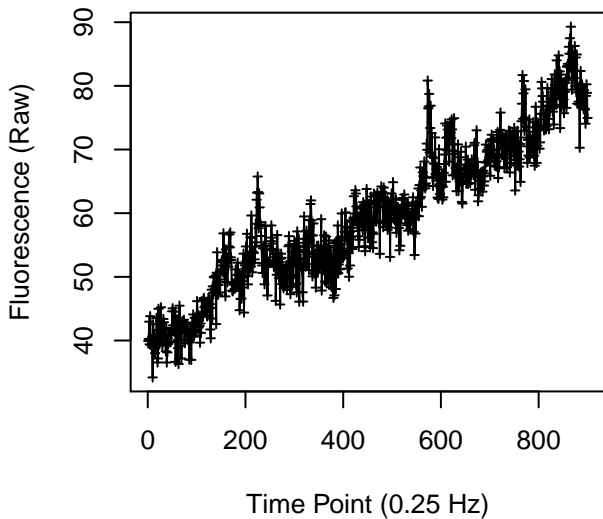

**Cell 2232**

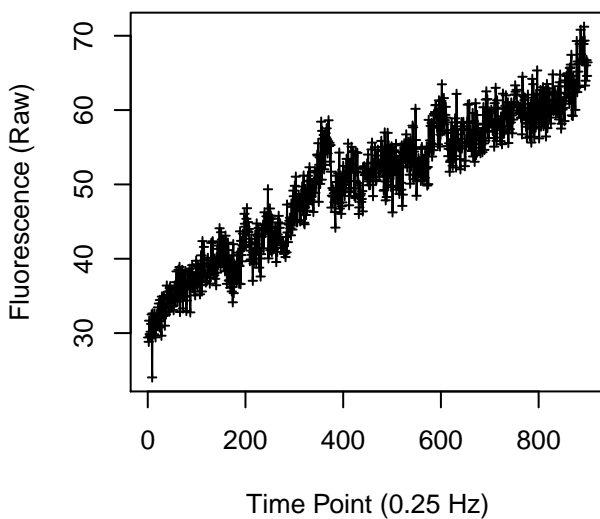

**Cell 2233**

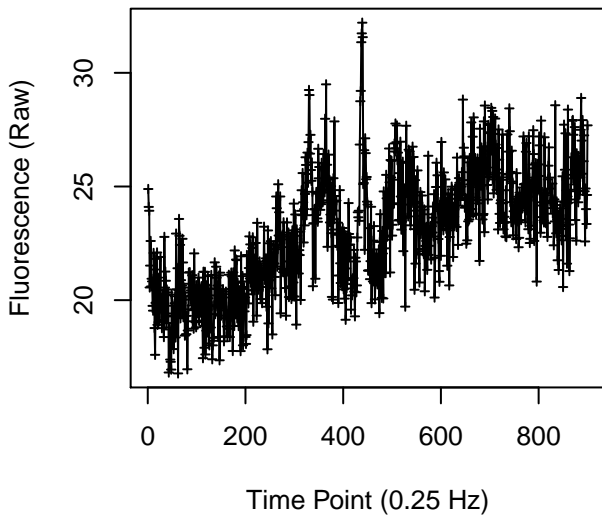

**Cell 2234**

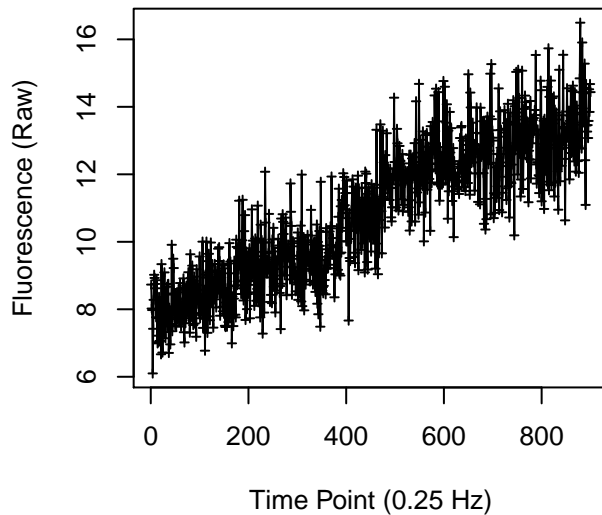

**Cell 2235**

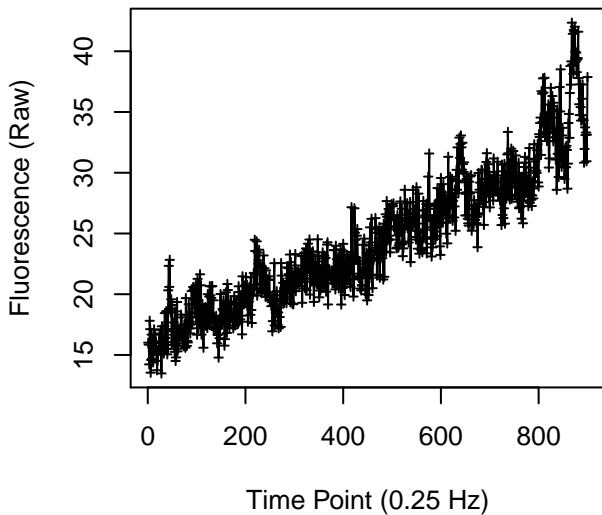

**Cell 2236**

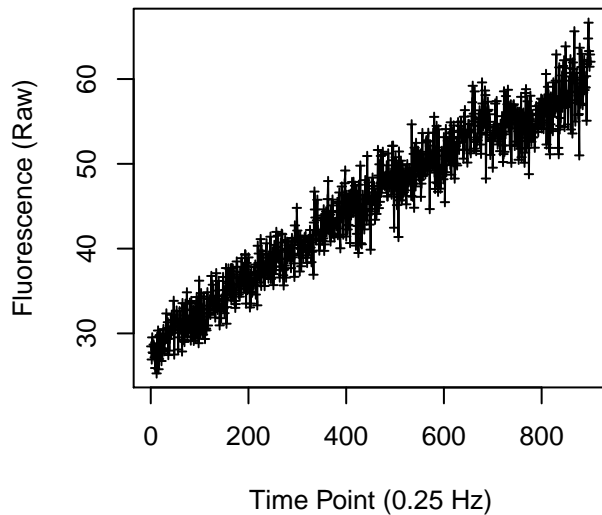

**Cell 2237**

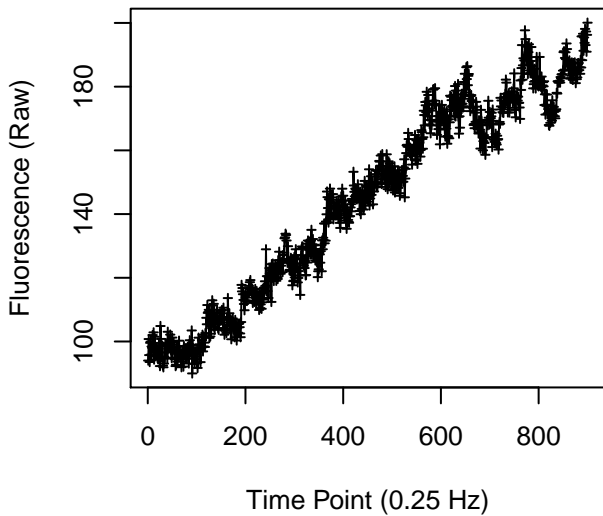

**Cell 2238**

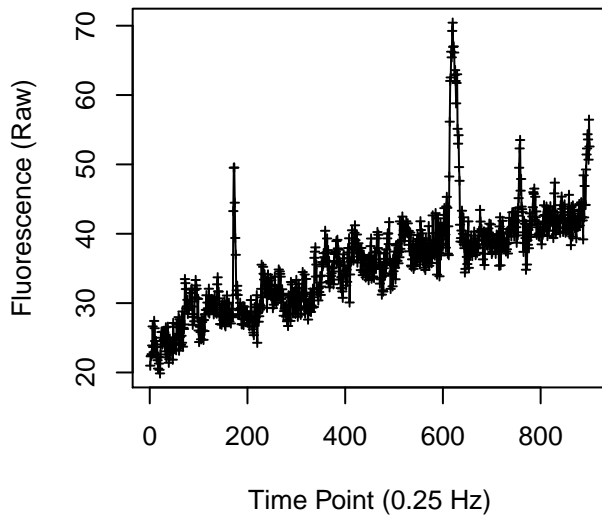

**Cell 2239**

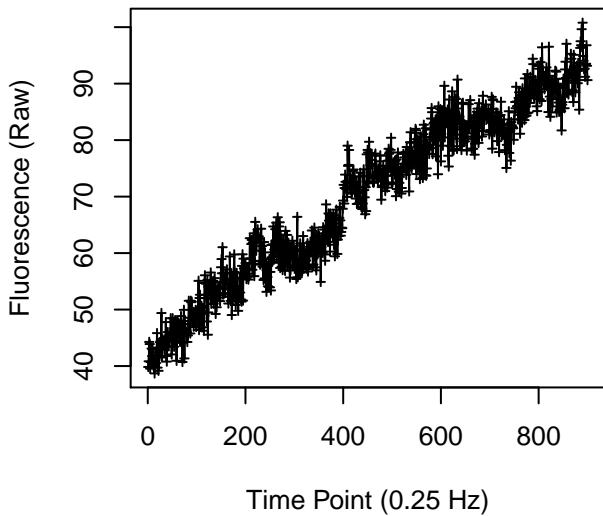

**Cell 2240**

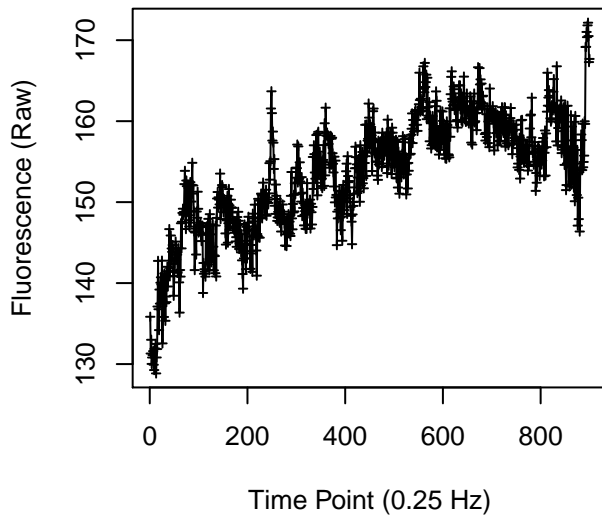

**Cell 2241**

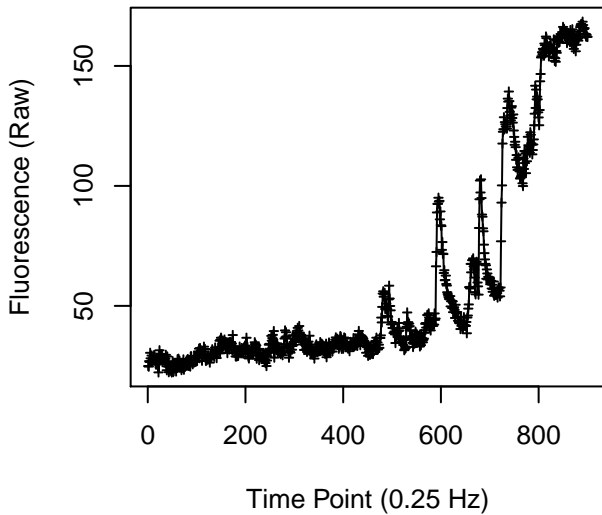

**Cell 2242**

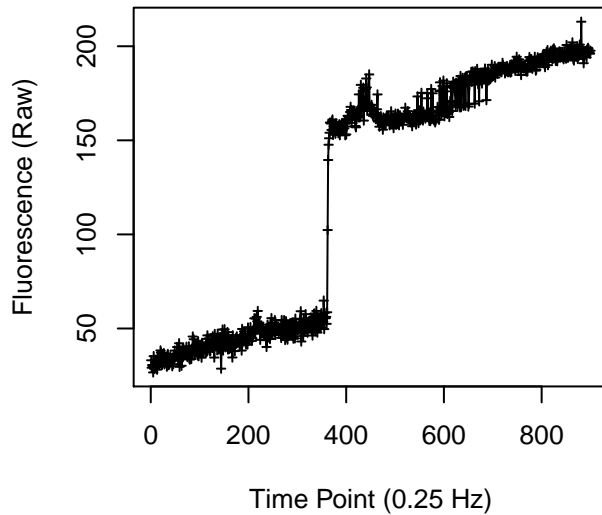

**Cell 2243**

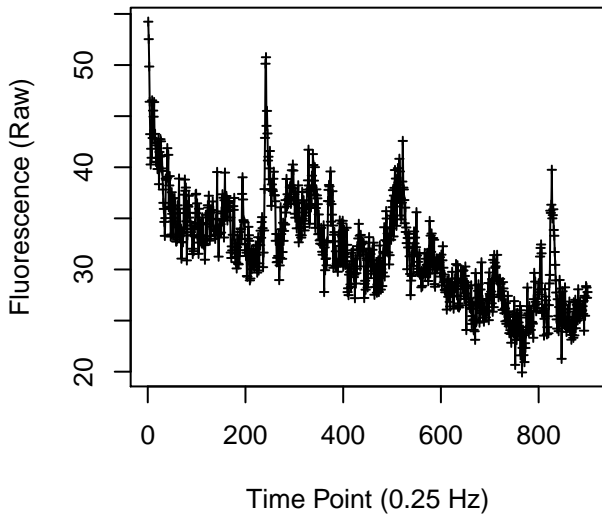

**Cell 2244**

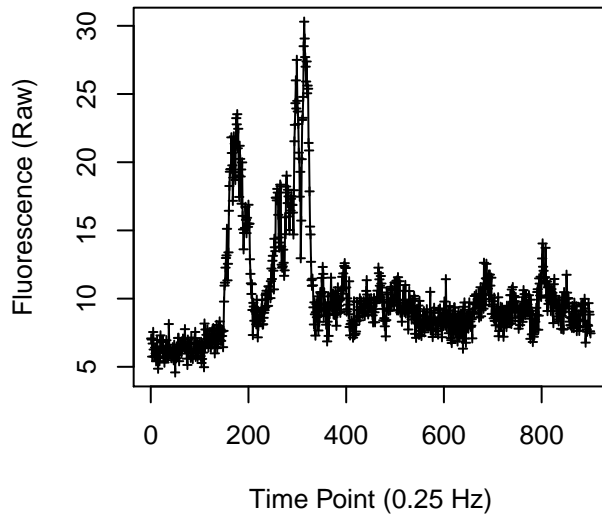

**Cell 2245**

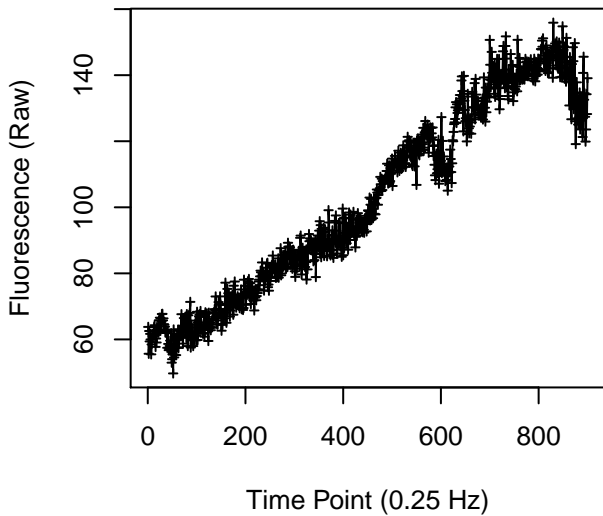

**Cell 2246**

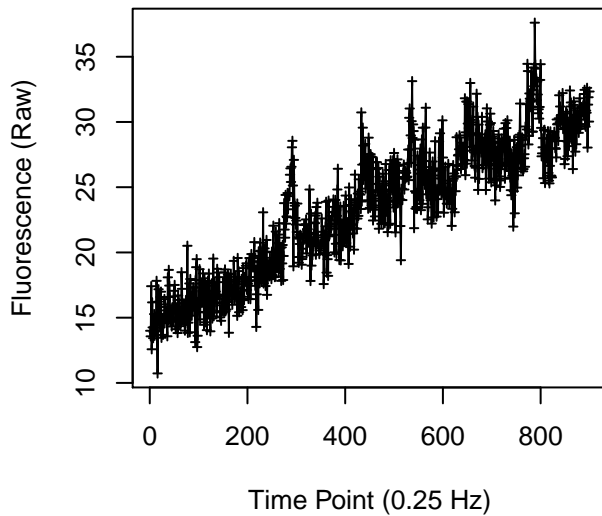

**Cell 2247**

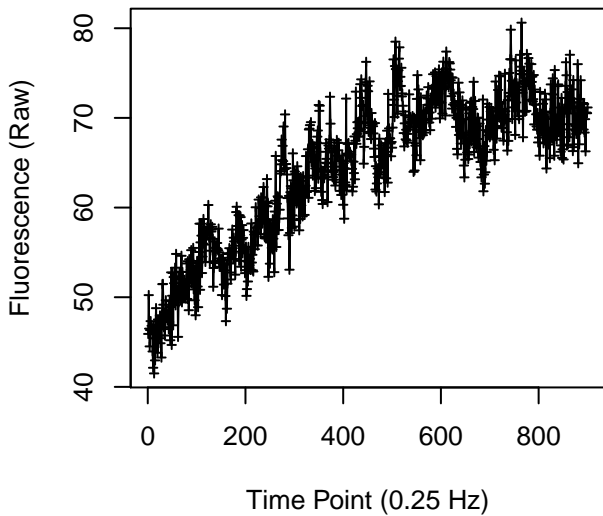

**Cell 2248**

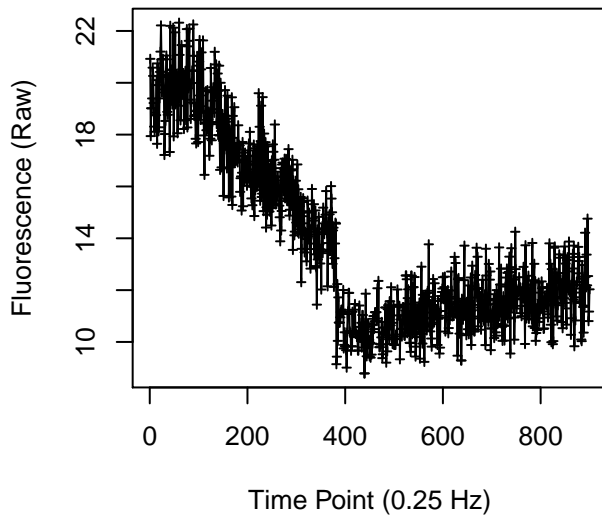



**Cell 2249**

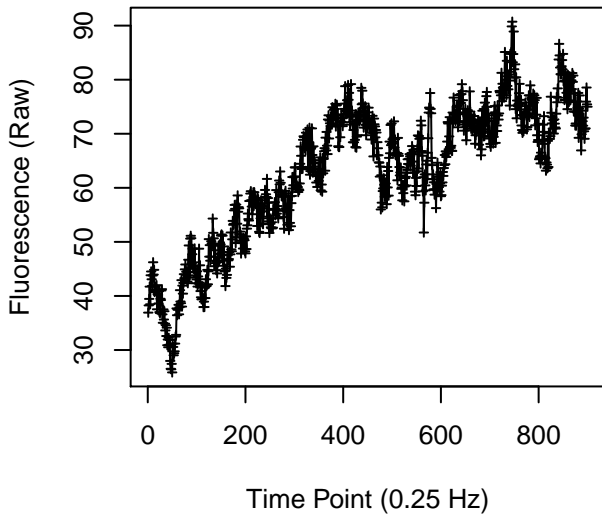

**Cell 2250**

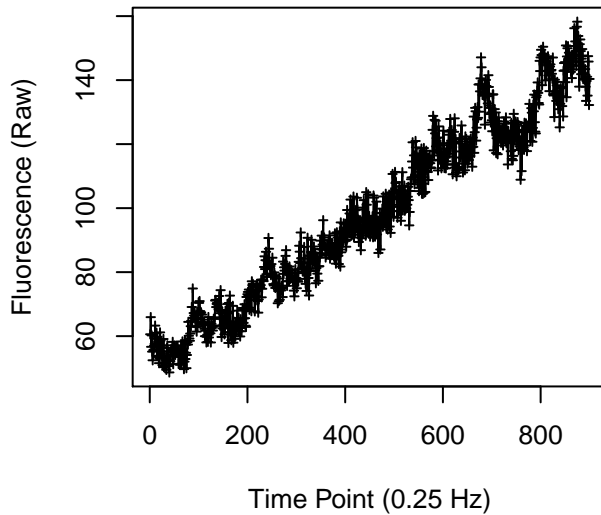

**Cell 2251**

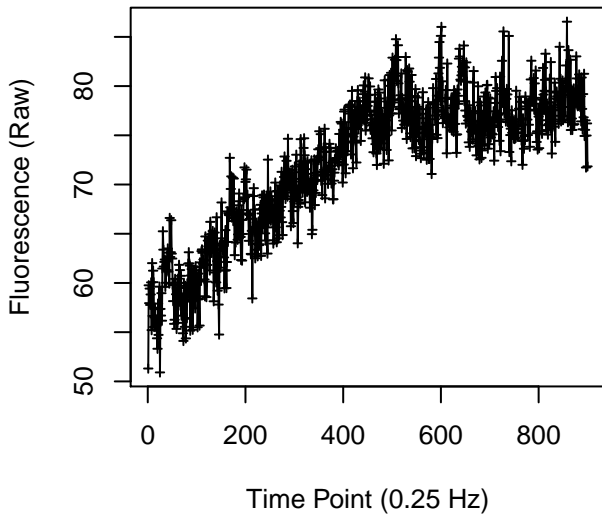

**Cell 2252**

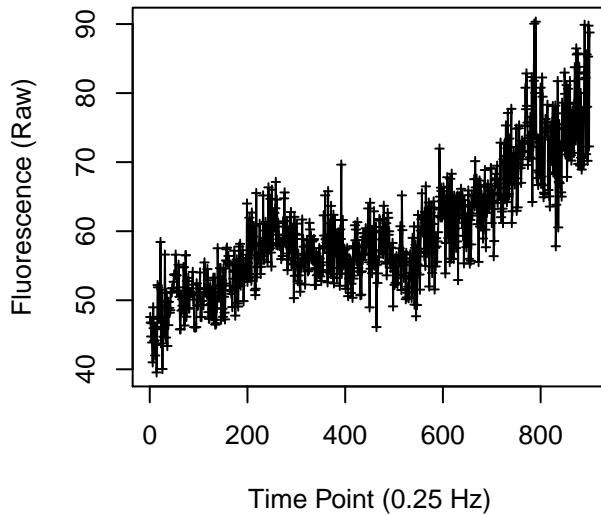

**Cell 2253**

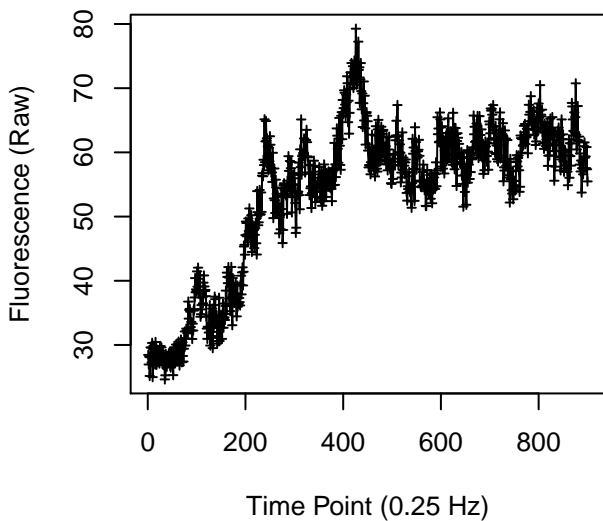

**Cell 2254**

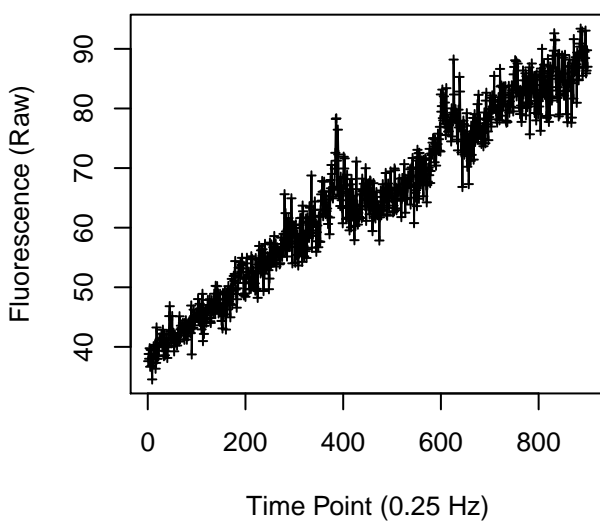

**Cell 2255**

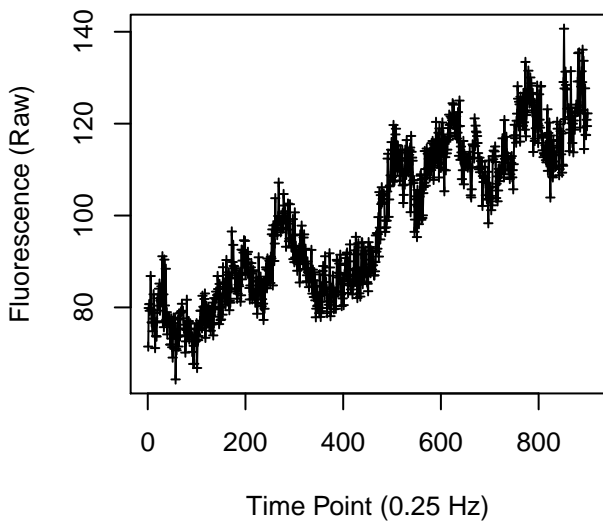

**Cell 2256**

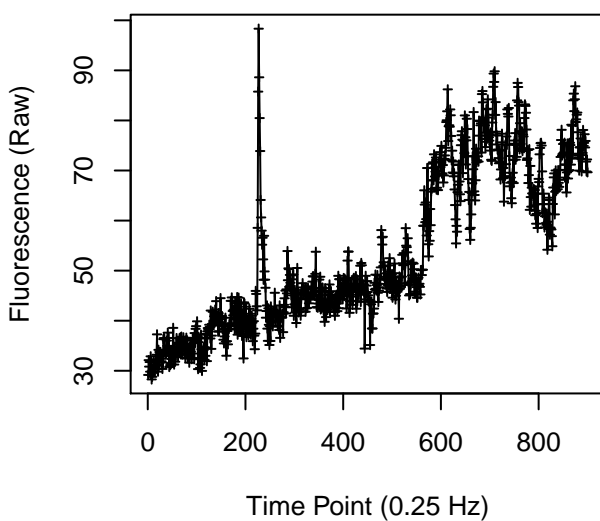

**Cell 2257**

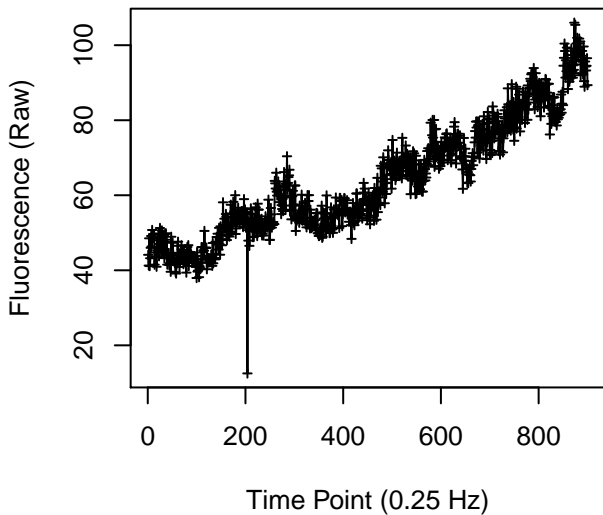

**Cell 2258**

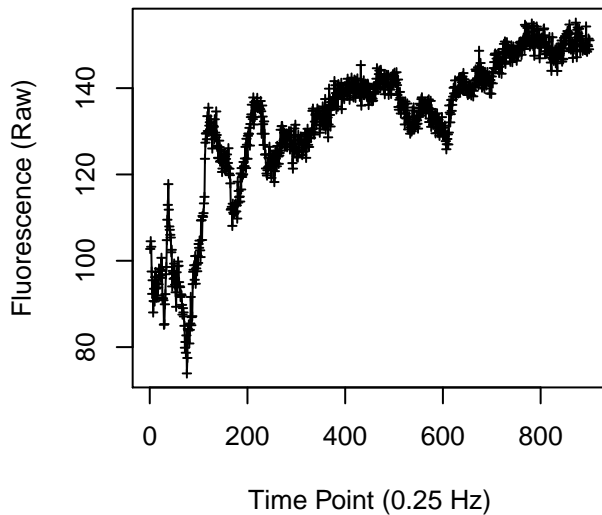

**Cell 2259**

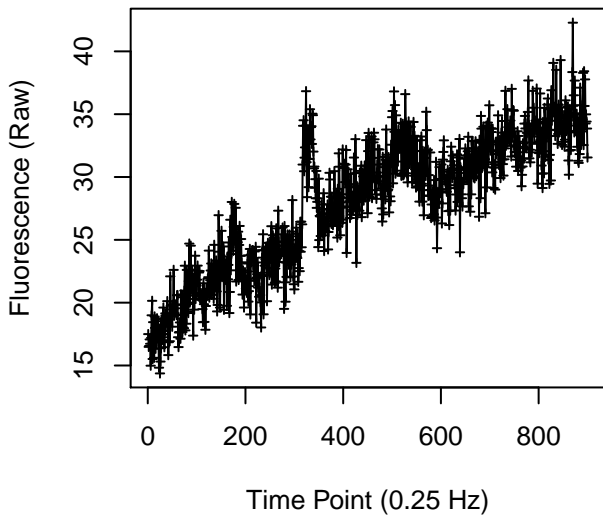

**Cell 2260**

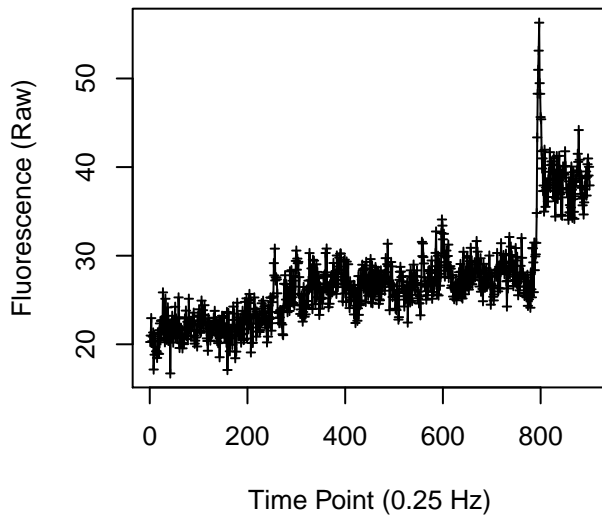

**Cell 2261**

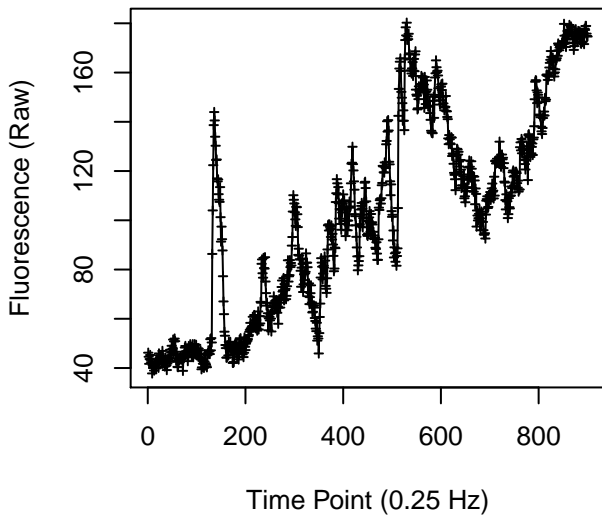

**Cell 2262**

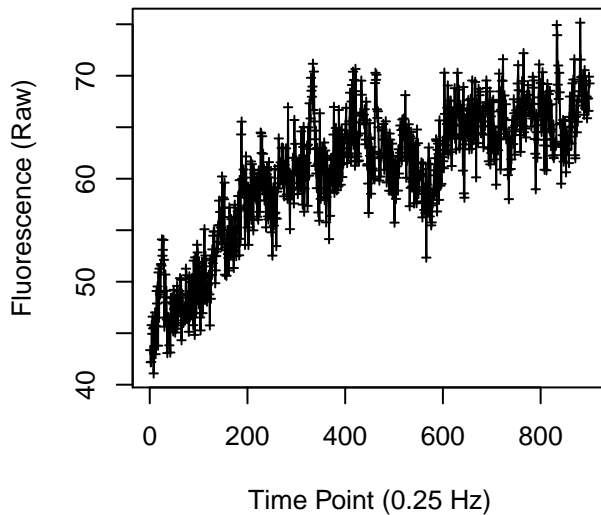

**Cell 2263**

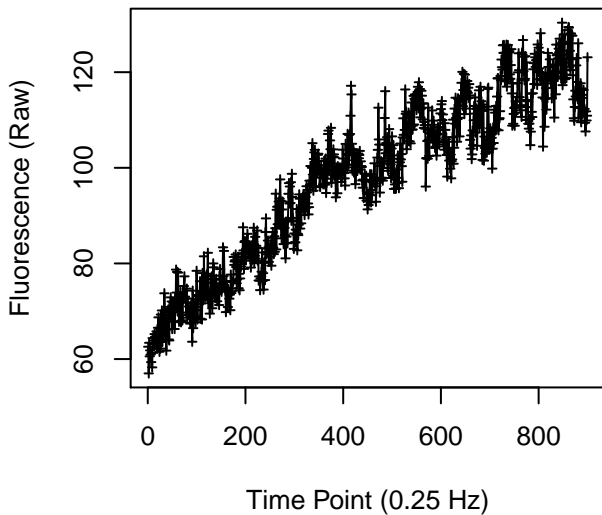

**Cell 2264**

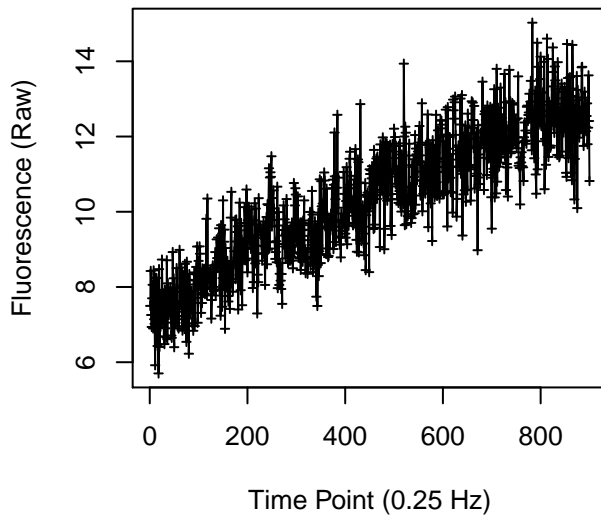

**Cell 2265**

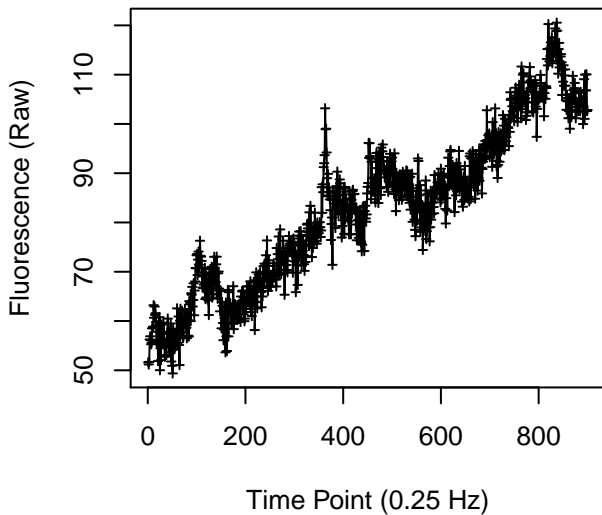

**Cell 2266**

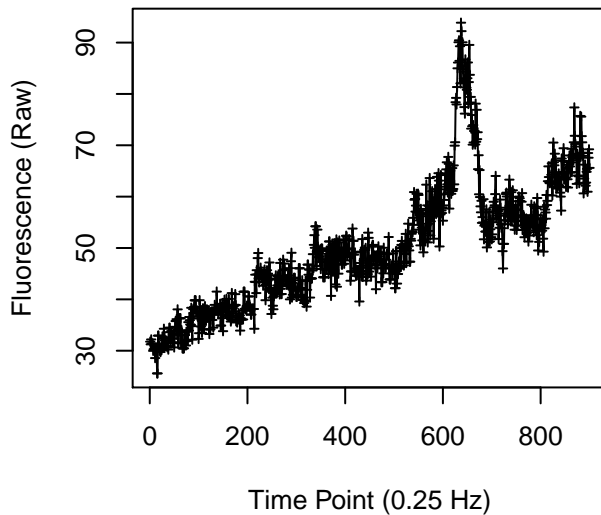

**Cell 2267**

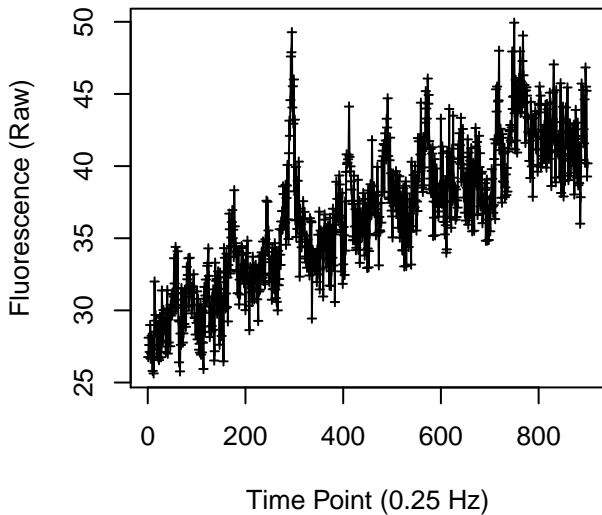

**Cell 2268**

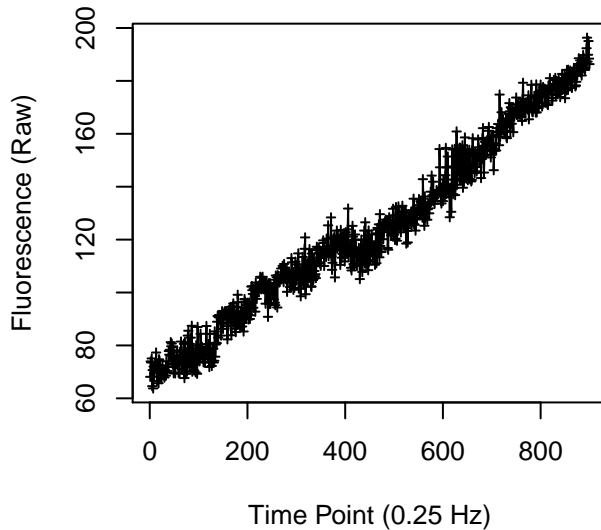

**Cell 2269**

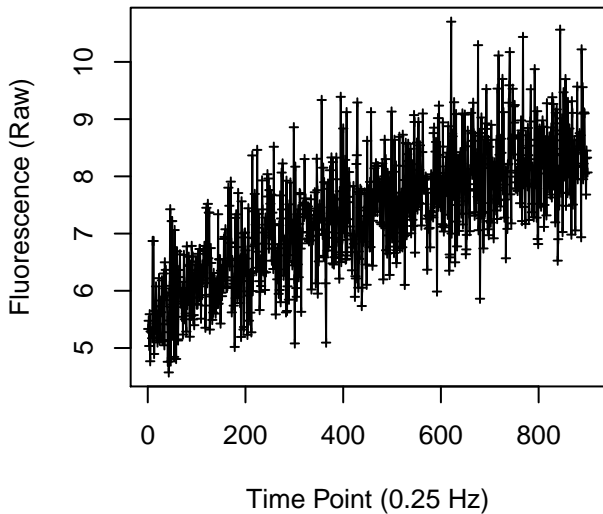

**Cell 2270**

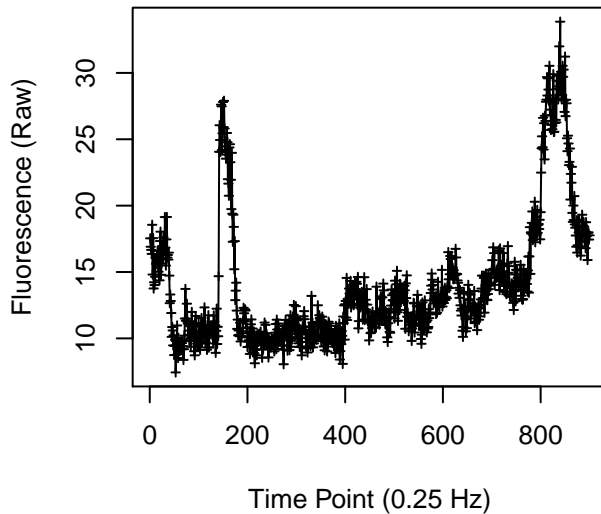

**Cell 2271**

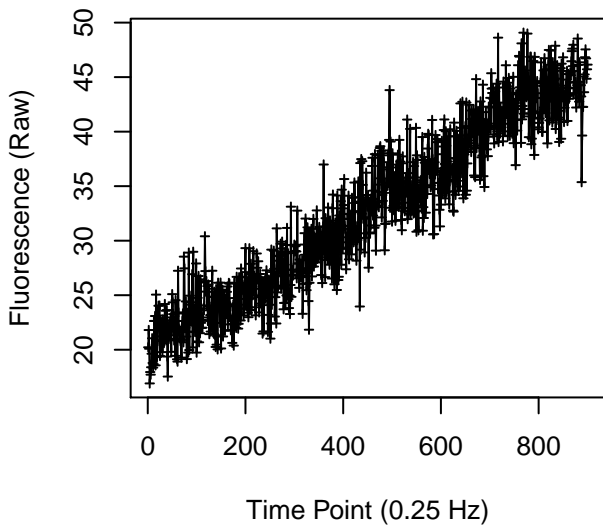

**Cell 2272**

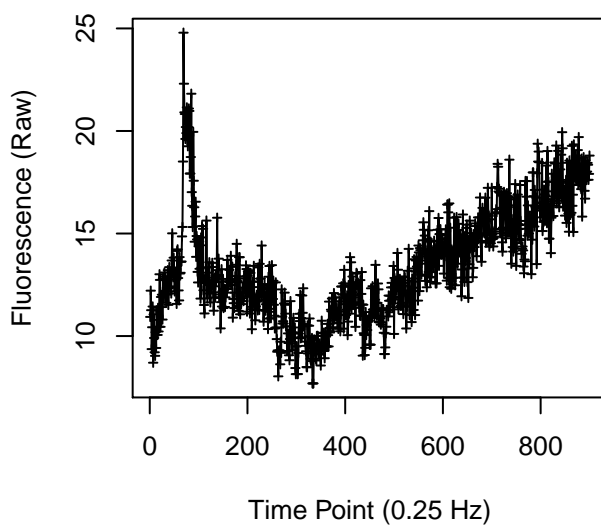

**Cell 2273**

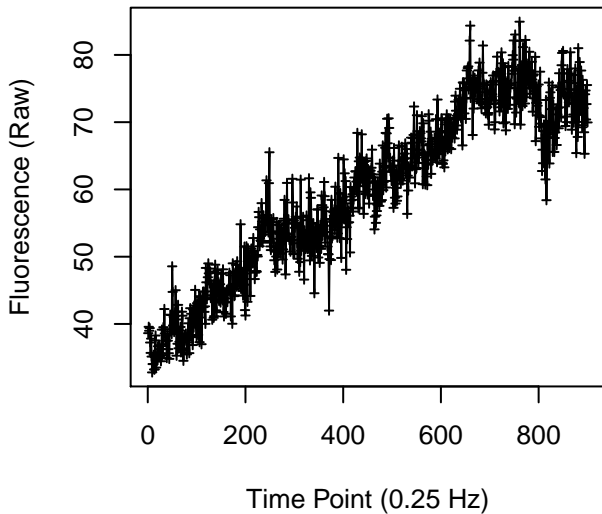

**Cell 2274**

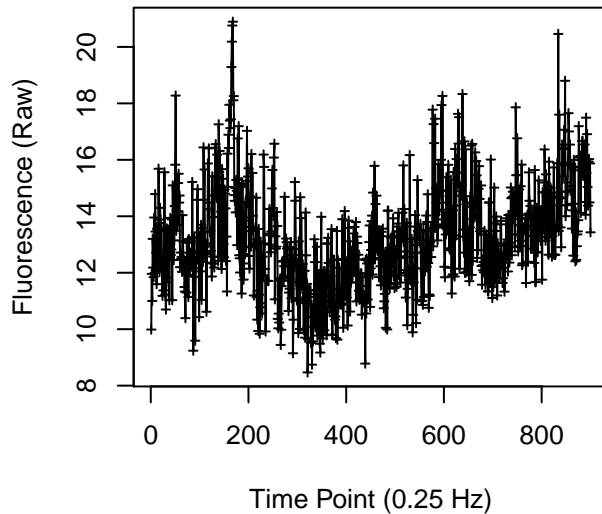

**Cell 2275**

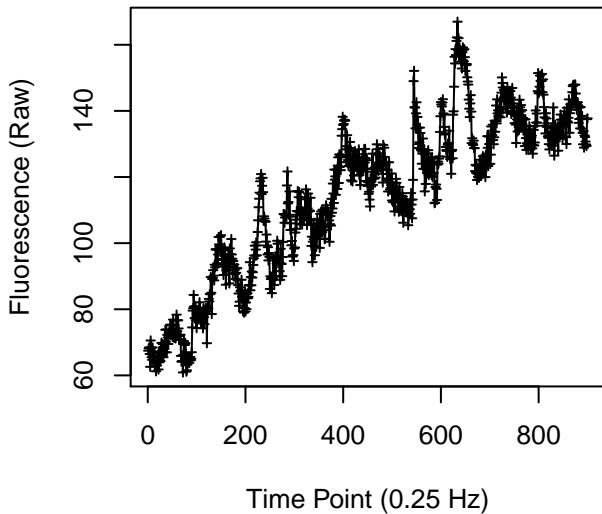

**Cell 2276**

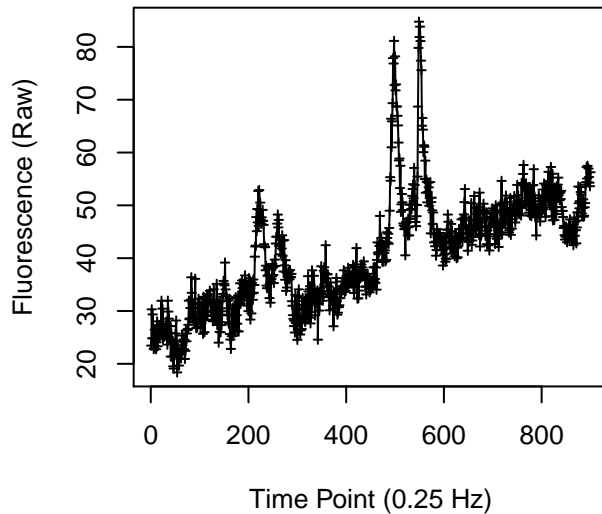

**Cell 2277**

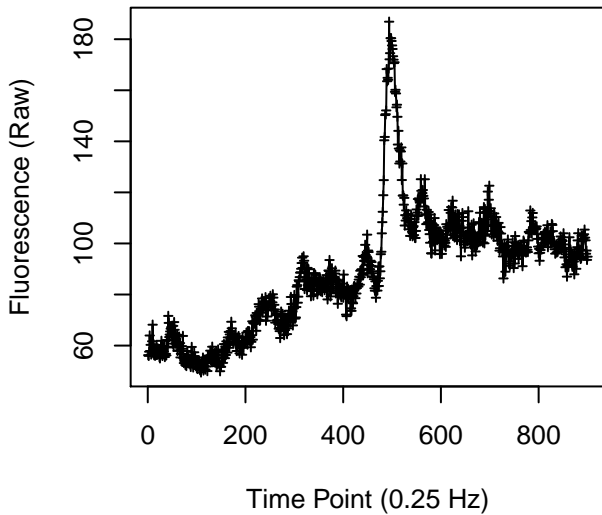

**Cell 2278**

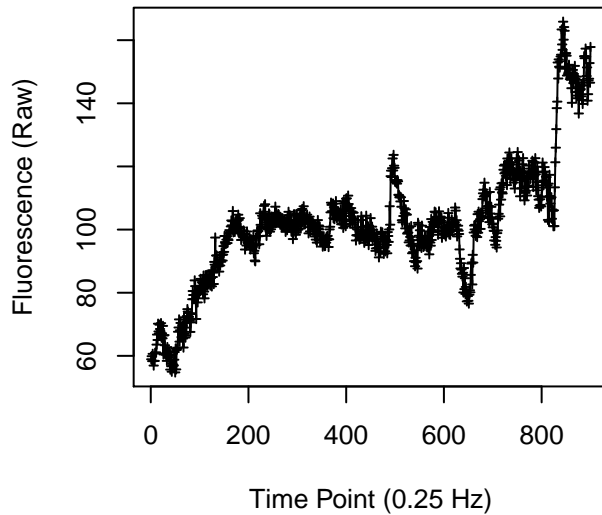

**Cell 2279**

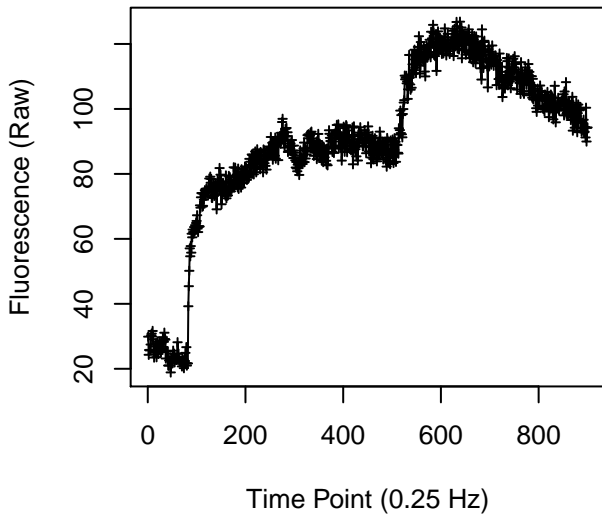

**Cell 2280**

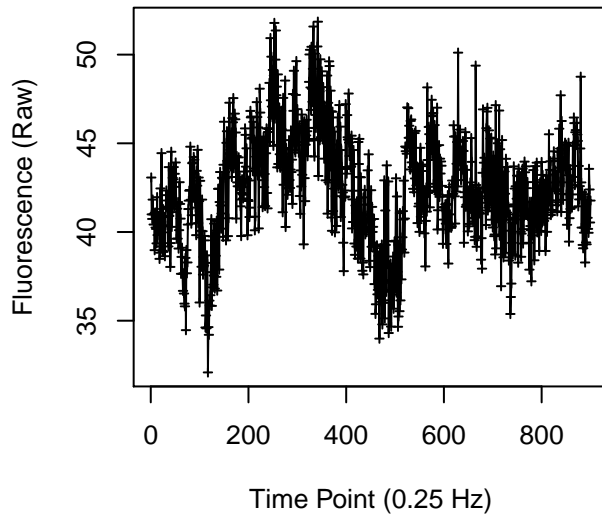



**Cell 2281**

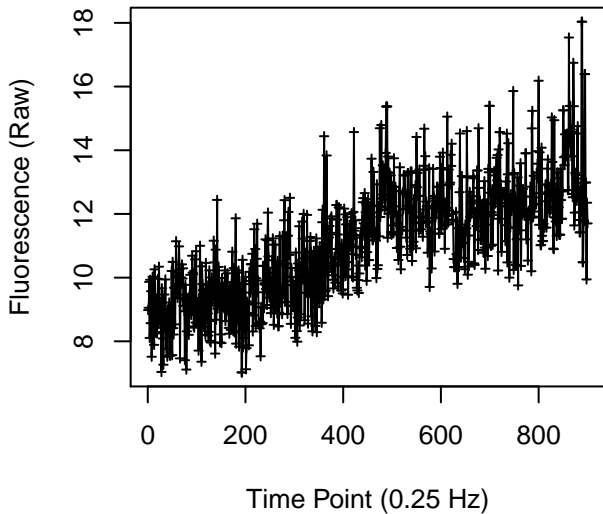

**Cell 2282**

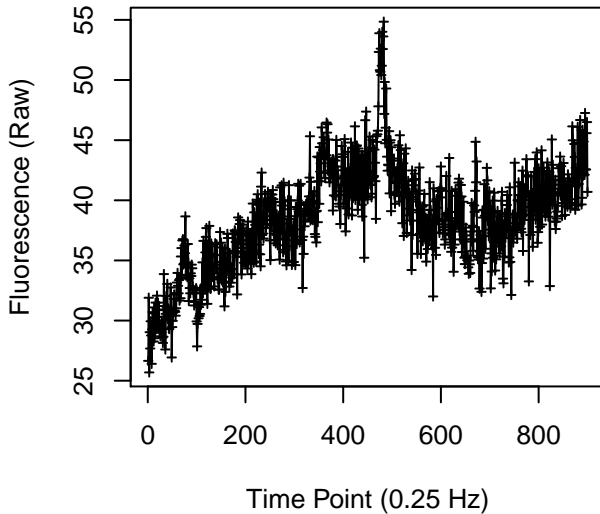

**Cell 2283**

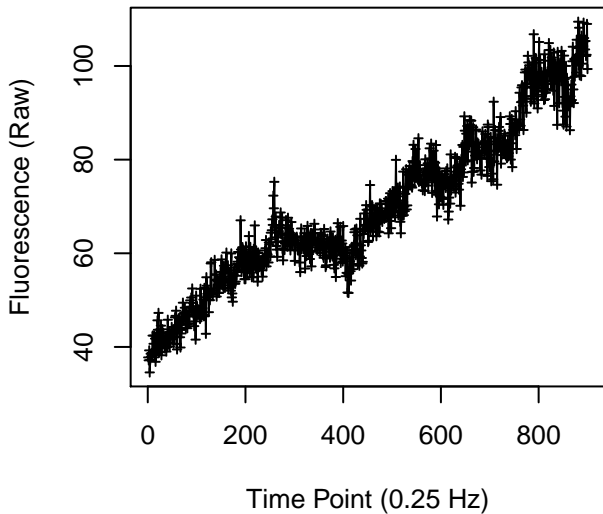

**Cell 2284**

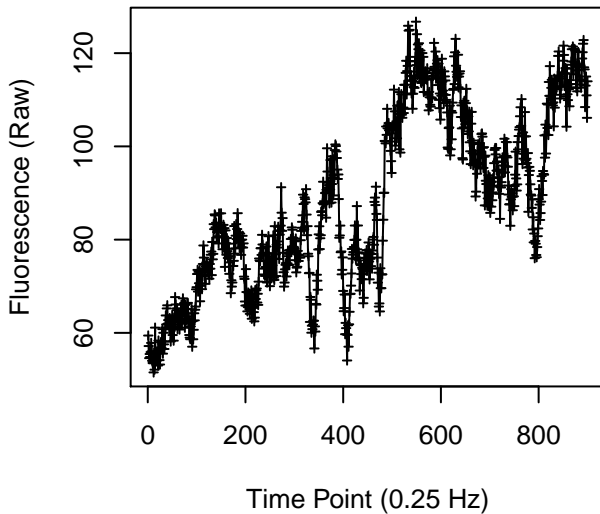

**Cell 2285**

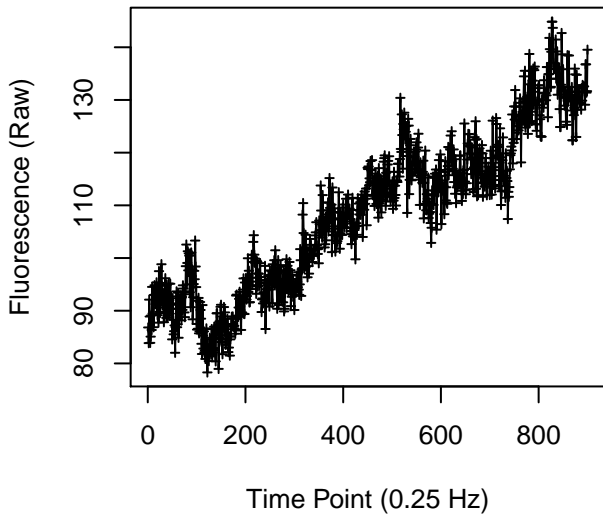

**Cell 2286**

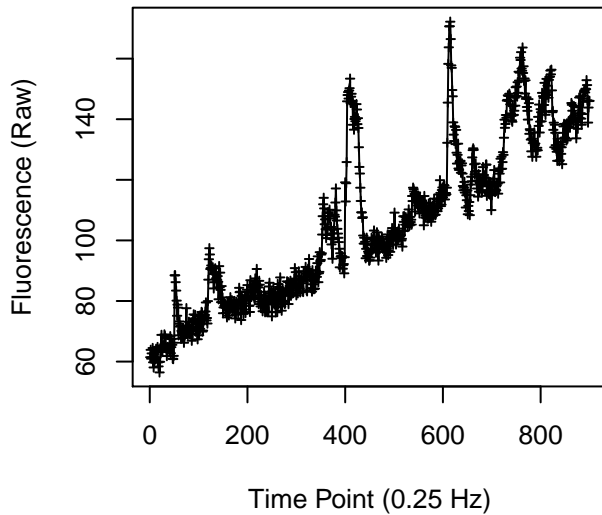

**Cell 2287**

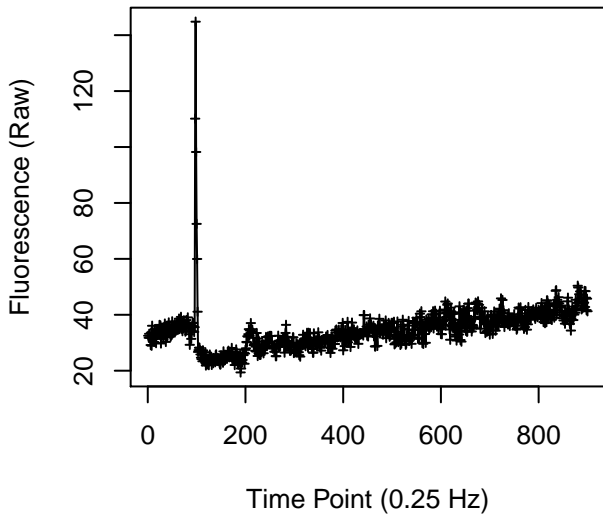

**Cell 2288**

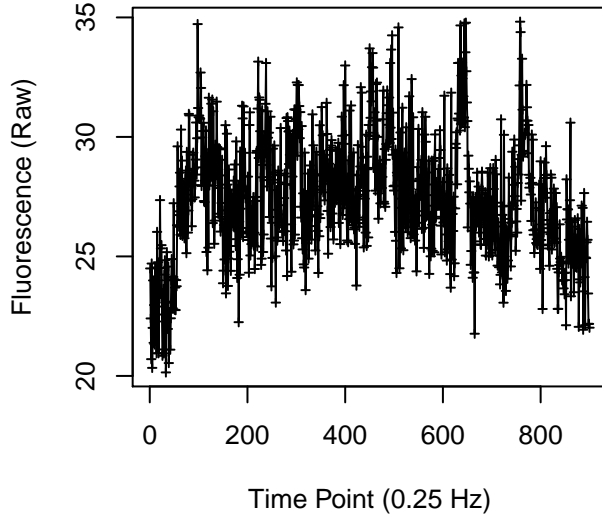

**Cell 2289**

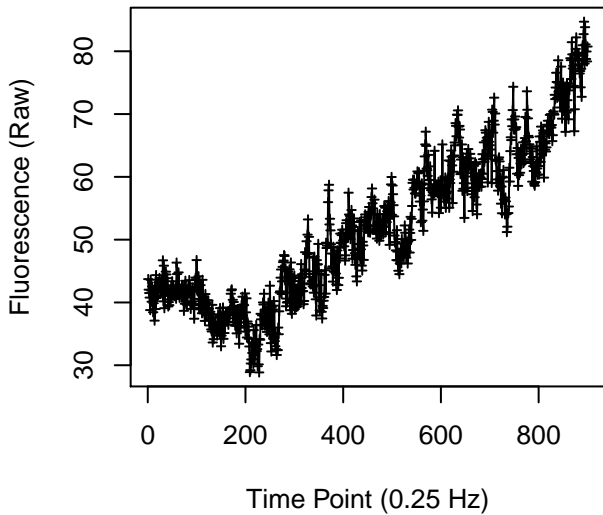

**Cell 2290**

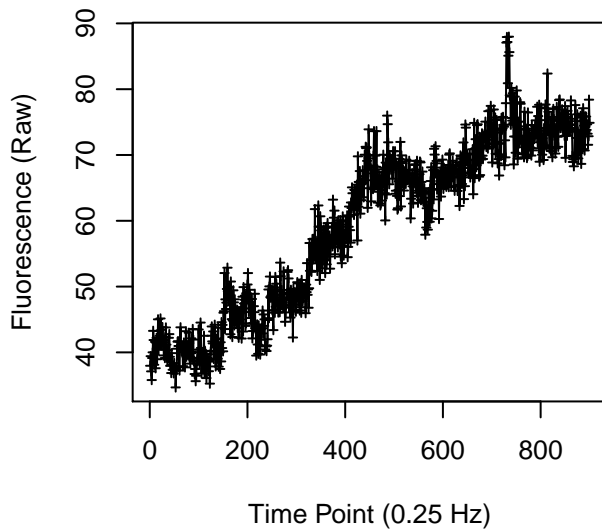

**Cell 2291**

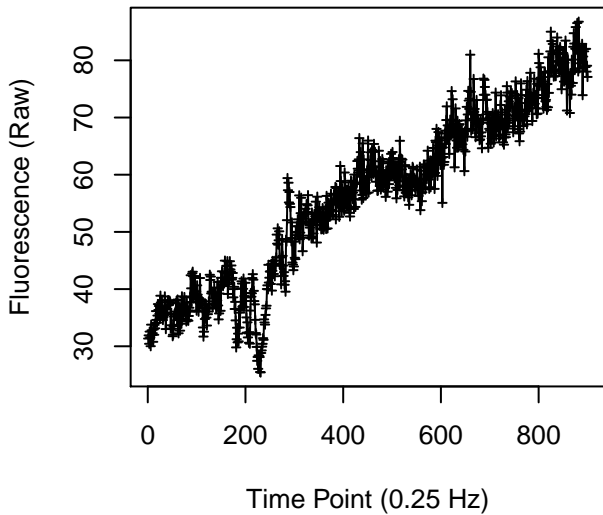

**Cell 2292**

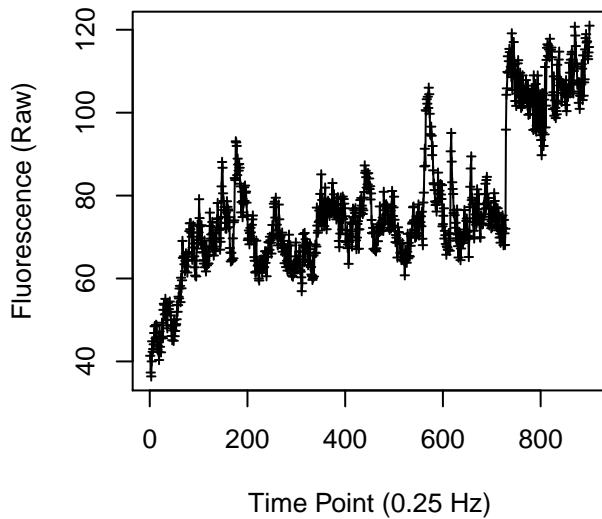

**Cell 2293**

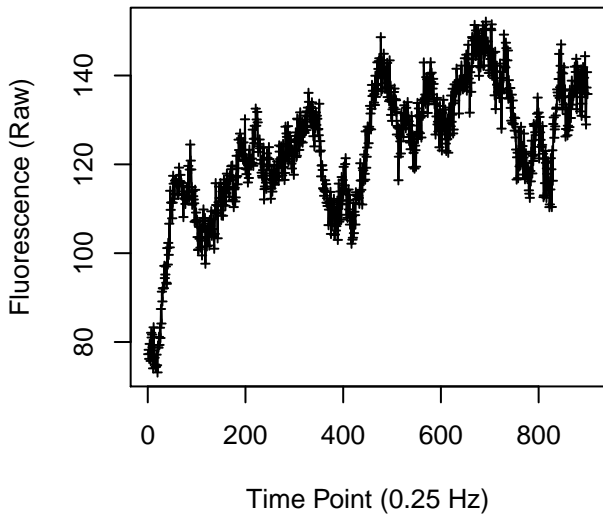

**Cell 2294**

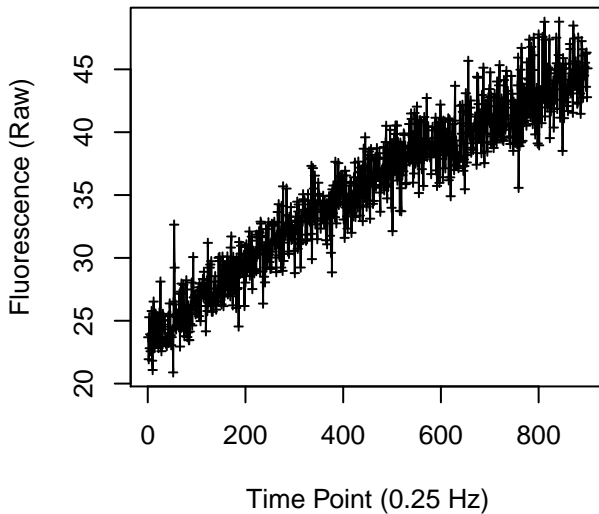

**Cell 2295**

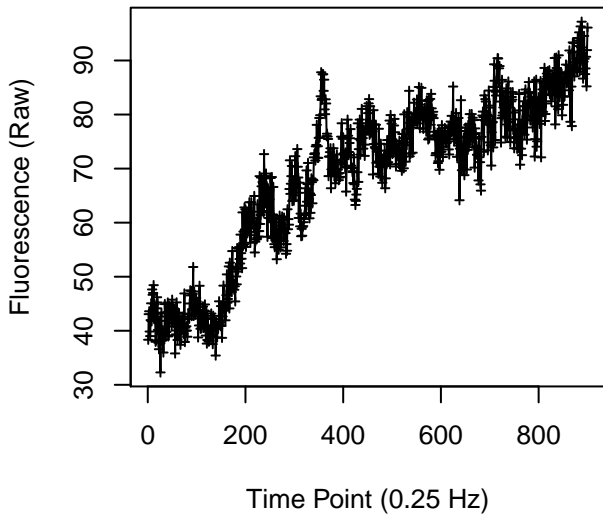

**Cell 2296**

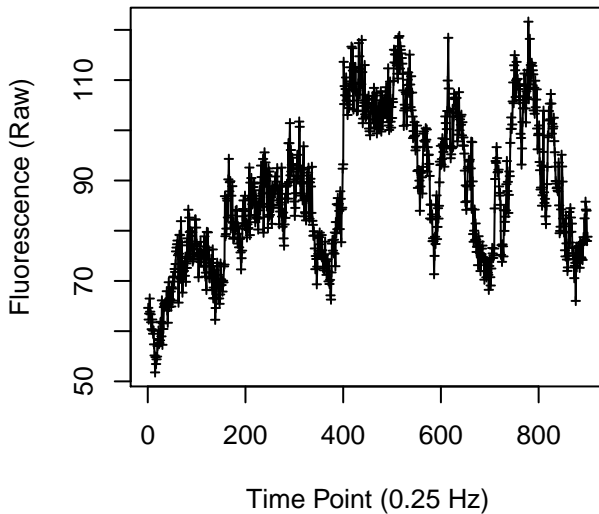

**Cell 2297**

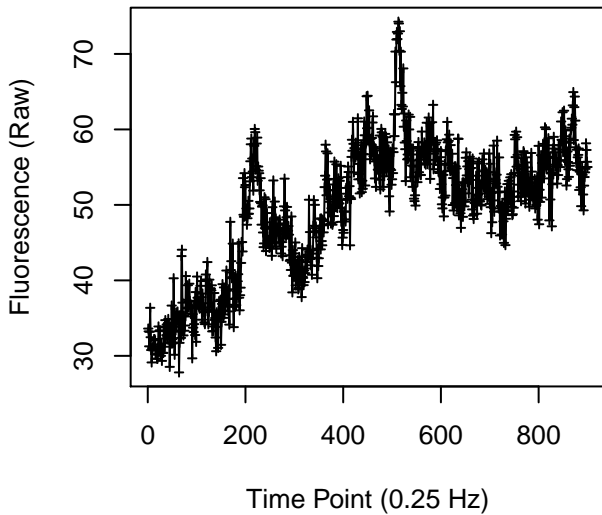

**Cell 2298**

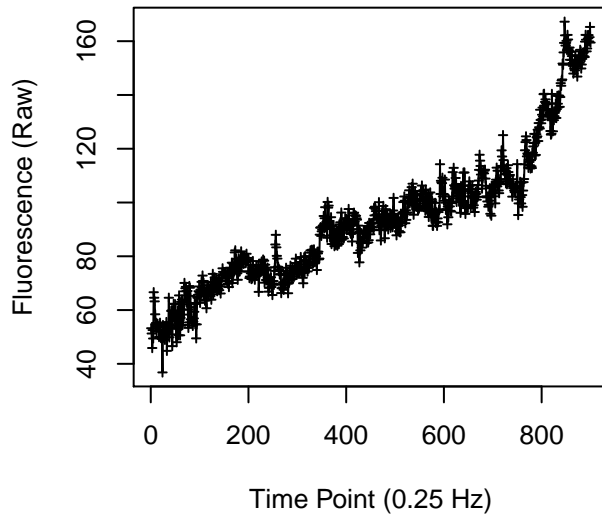

**Cell 2299**

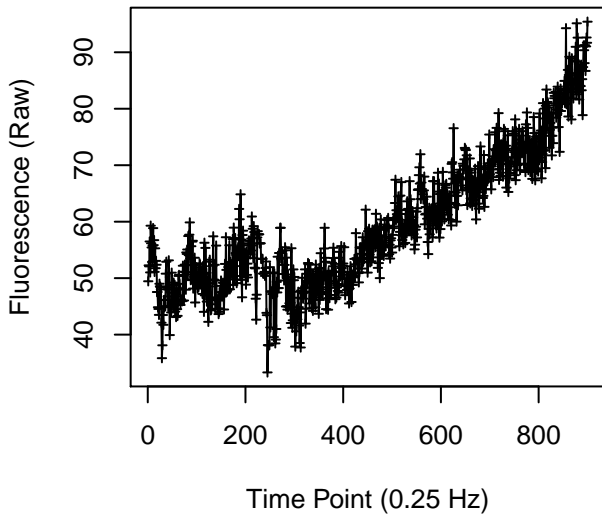

**Cell 2300**

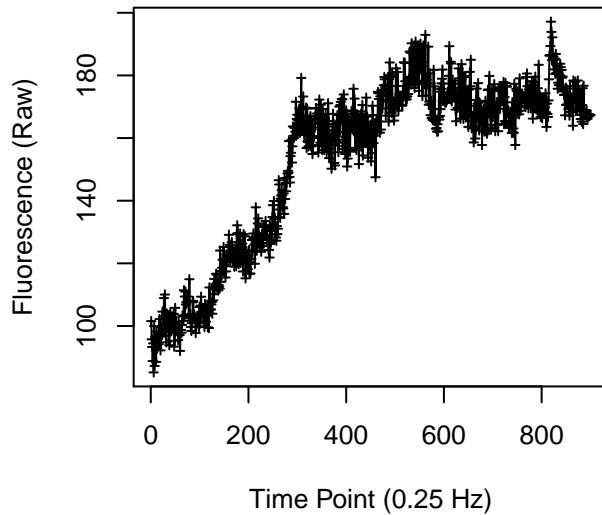

**Cell 2301**

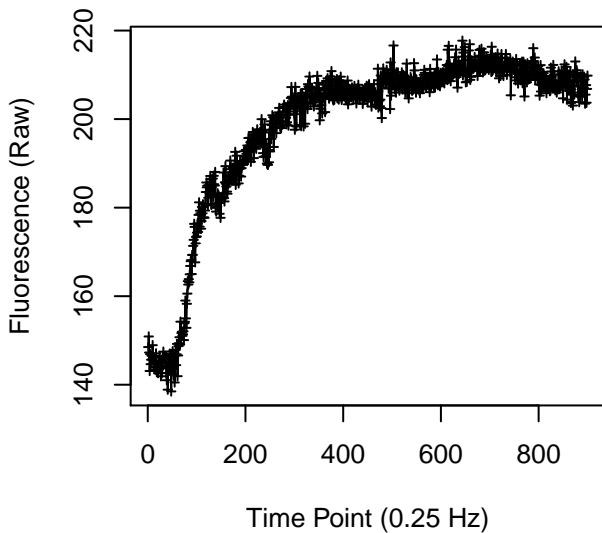

**Cell 2302**

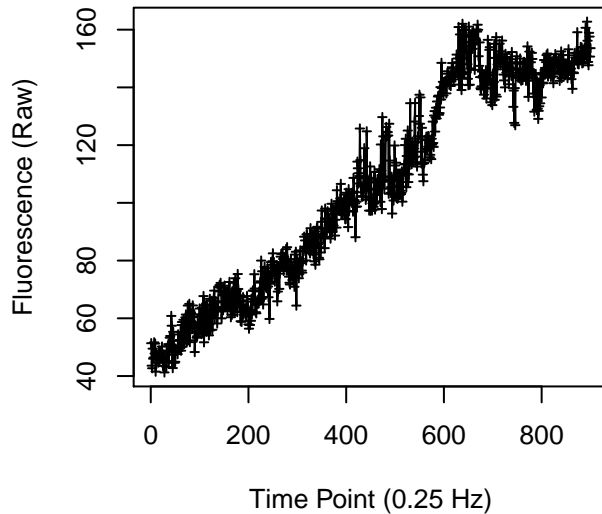

**Cell 2303**

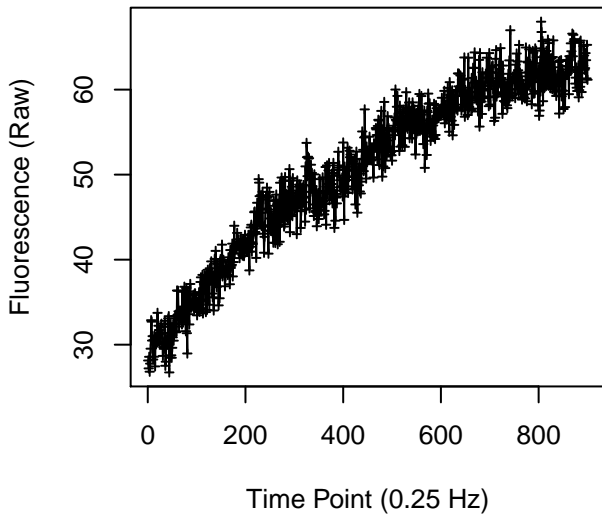

**Cell 2304**

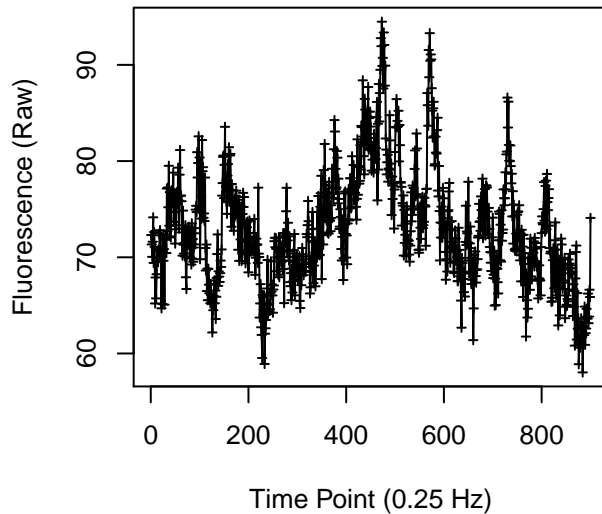

**Cell 2305**

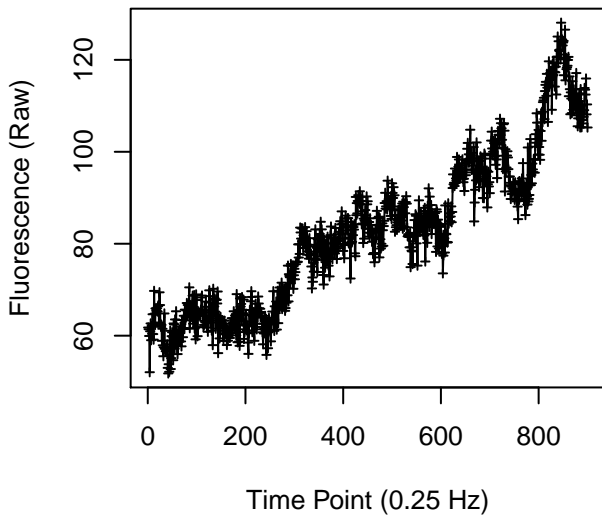

**Cell 2306**

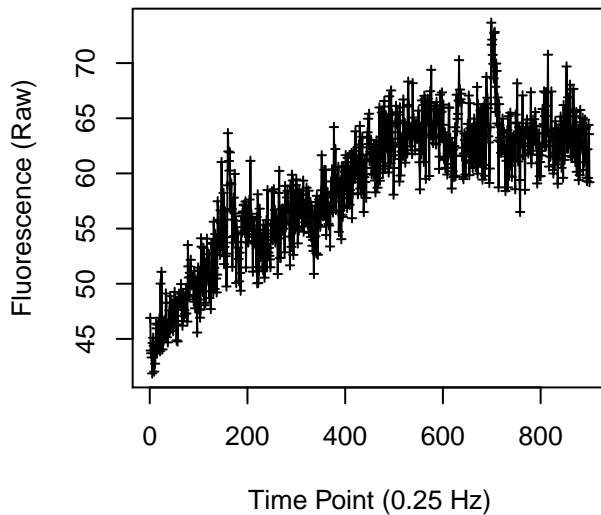

**Cell 2307**

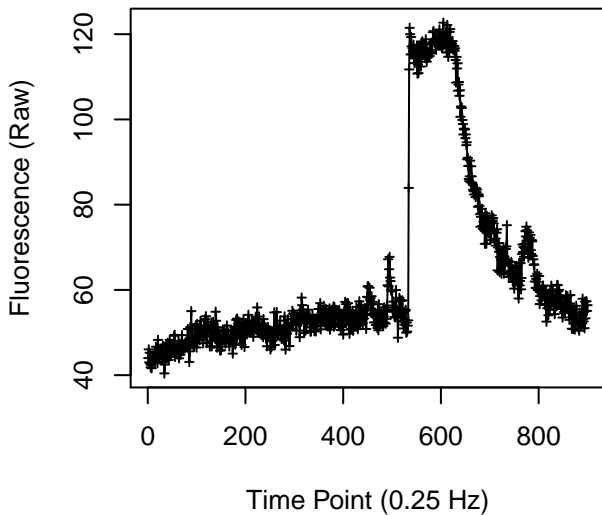

**Cell 2308**

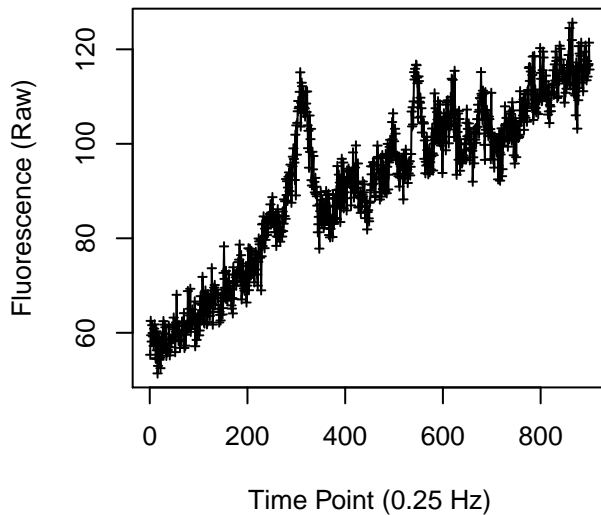

**Cell 2309**

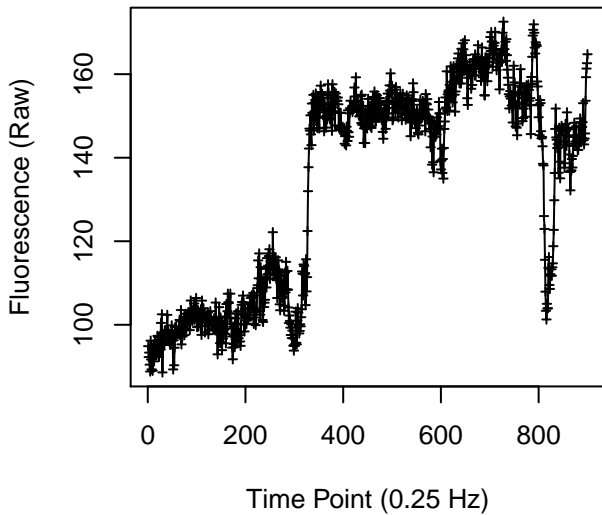

**Cell 2310**

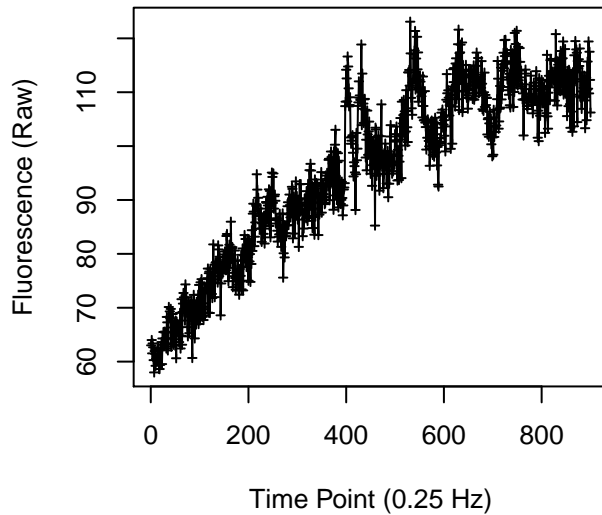

**Cell 2311**

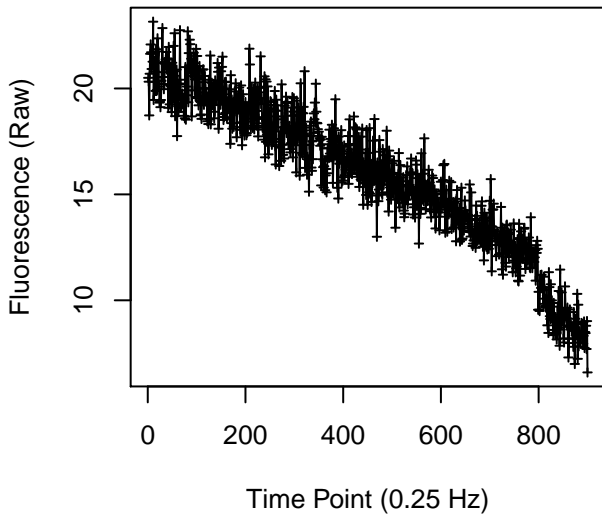

**Cell 2312**

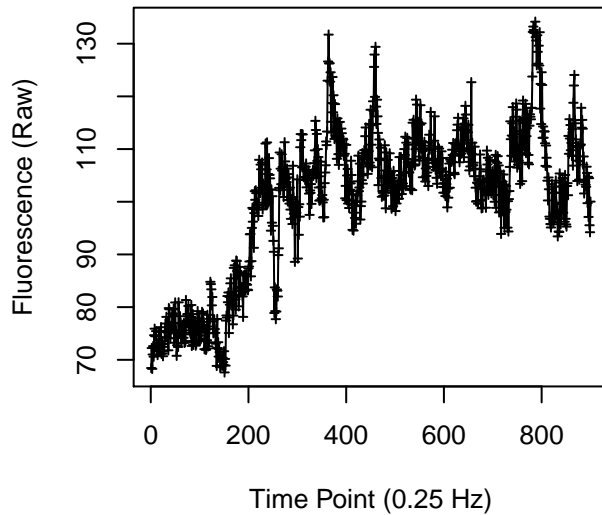



**Cell 2313**

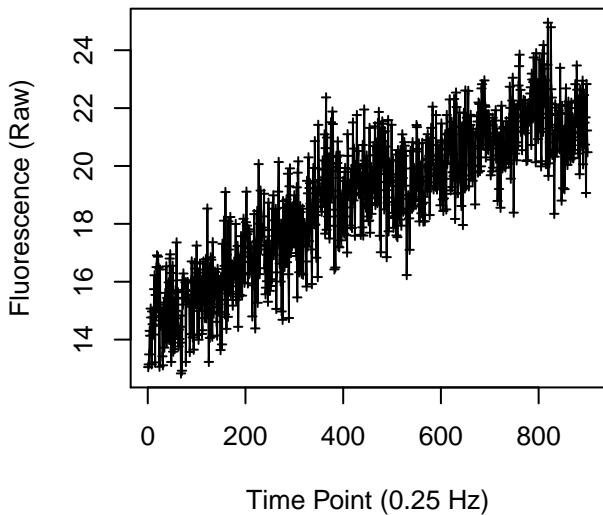

**Cell 2314**

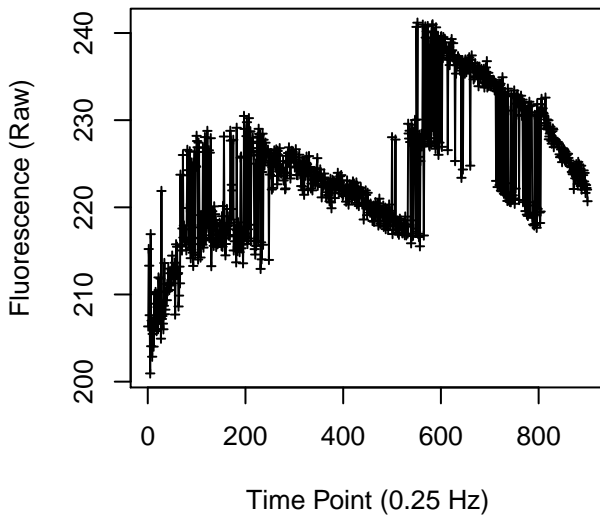

**Cell 2315**

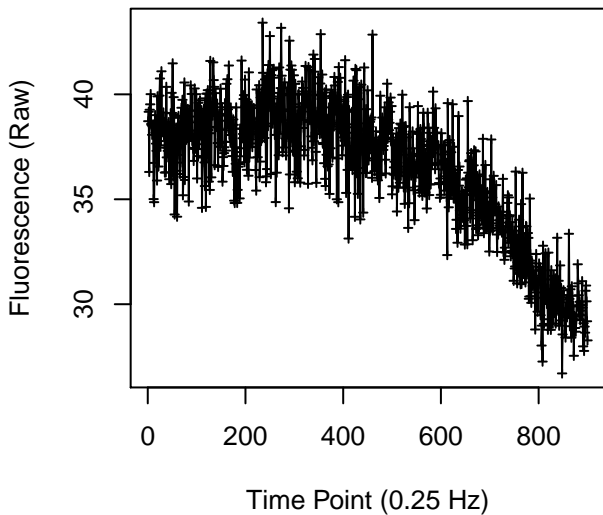

**Cell 2316**

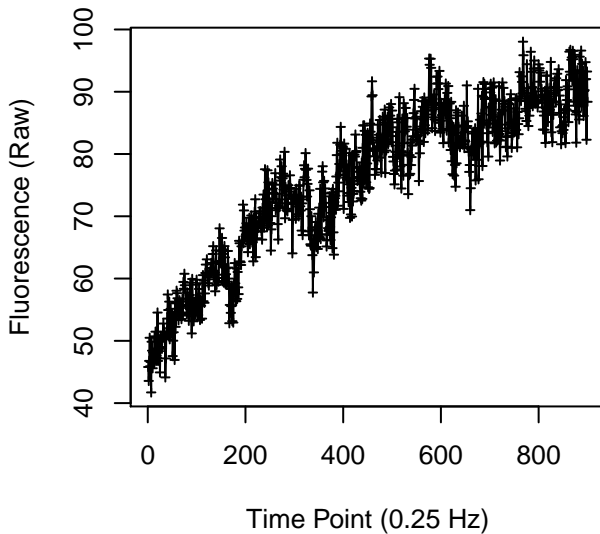

**Cell 2317**

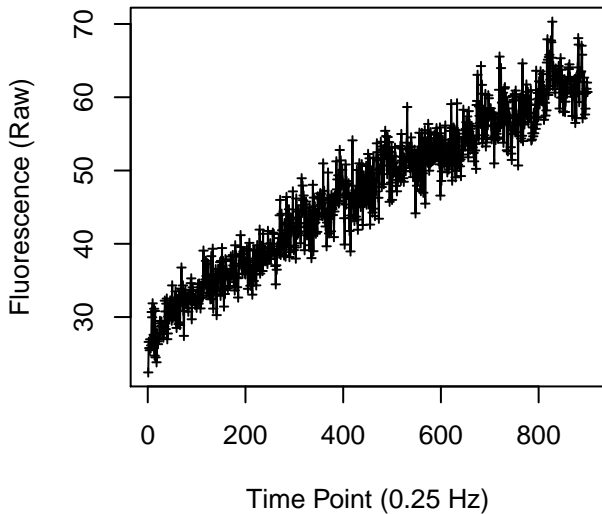

**Cell 2318**

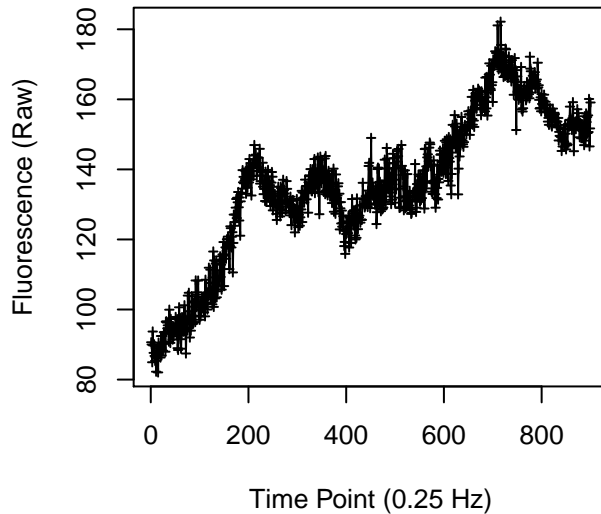

**Cell 2319**

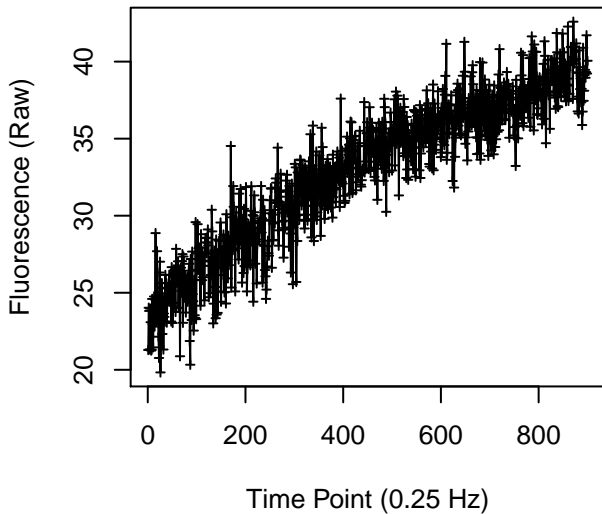

**Cell 2320**

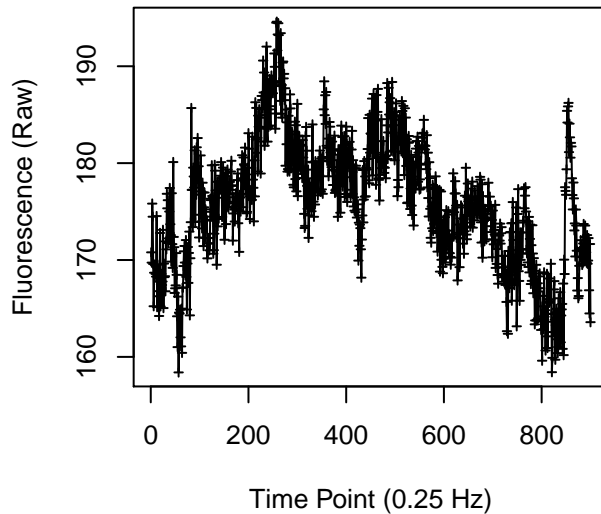

**Cell 2321**

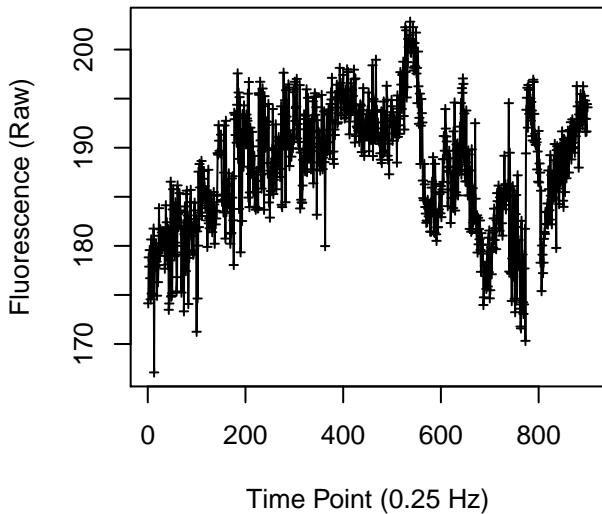

**Cell 2322**

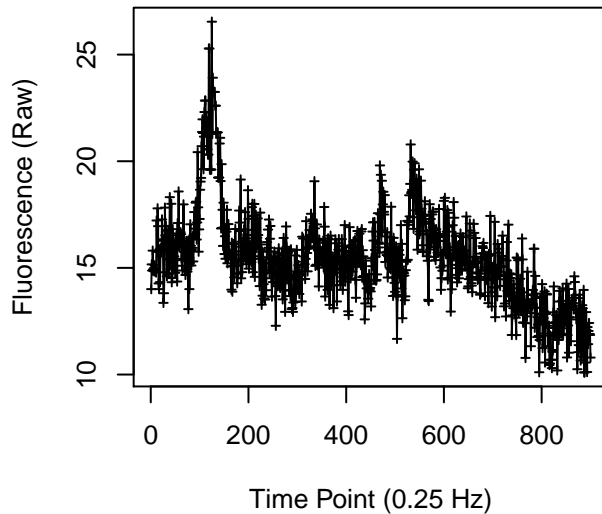

**Cell 2323**

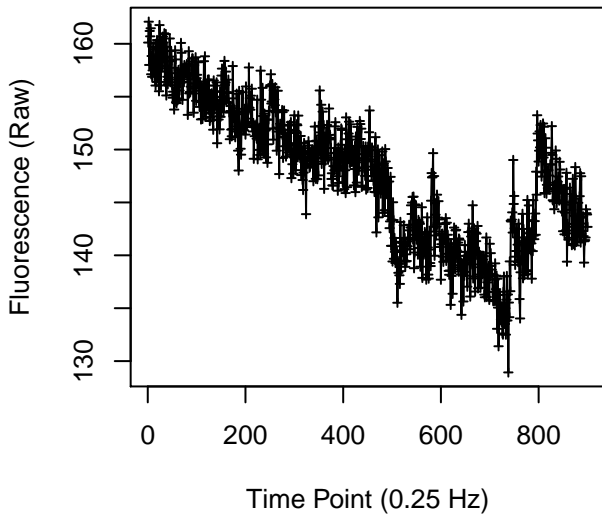

**Cell 2324**

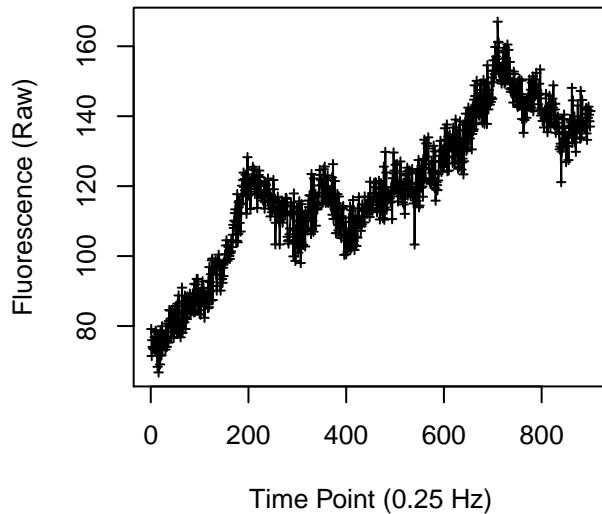

**Cell 2325**

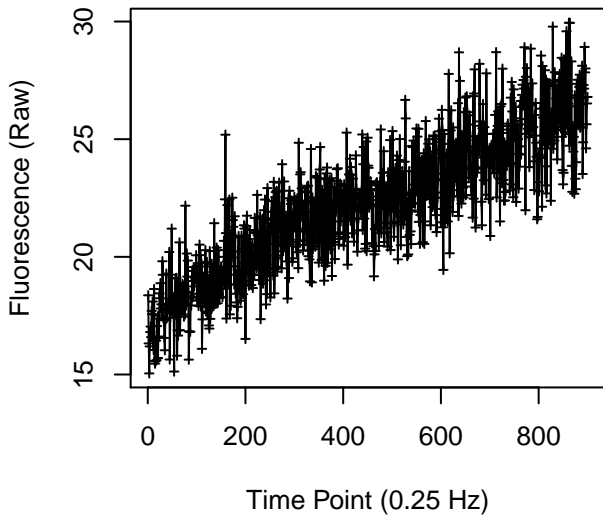

**Cell 2326**

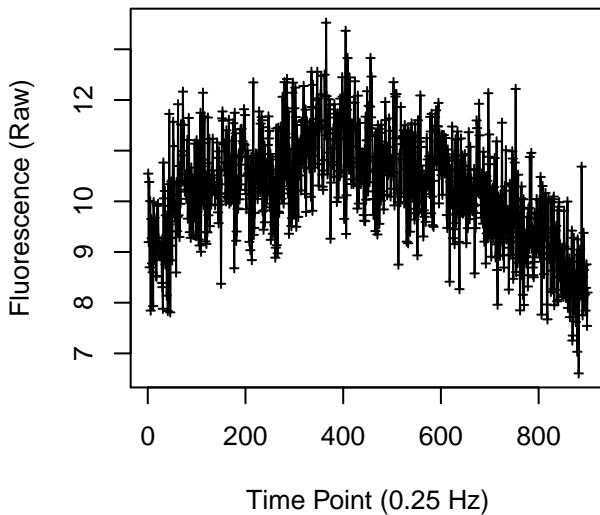

**Cell 2327**

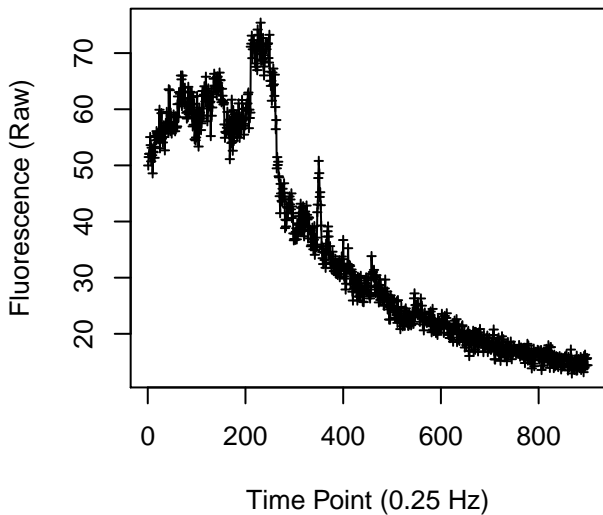

**Cell 2328**

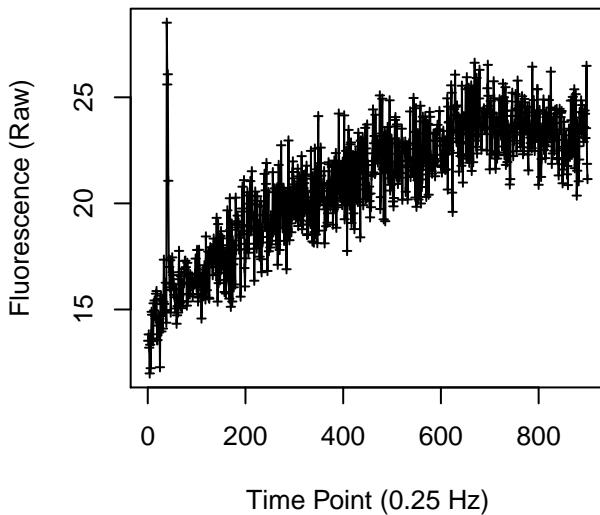

**Cell 2329**

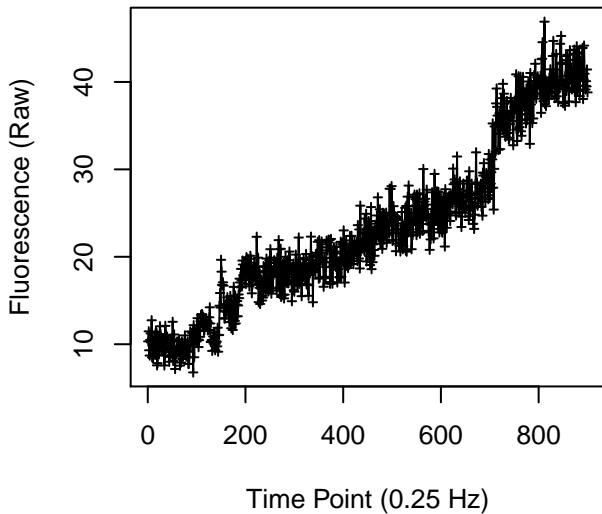

**Cell 2330**

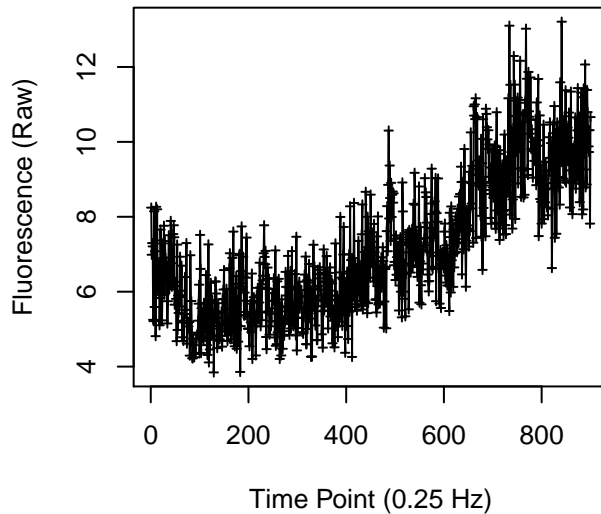

**Cell 2331**

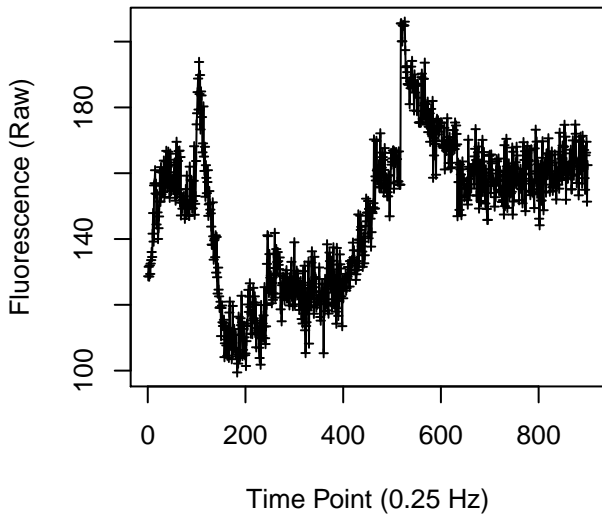

**Cell 2332**

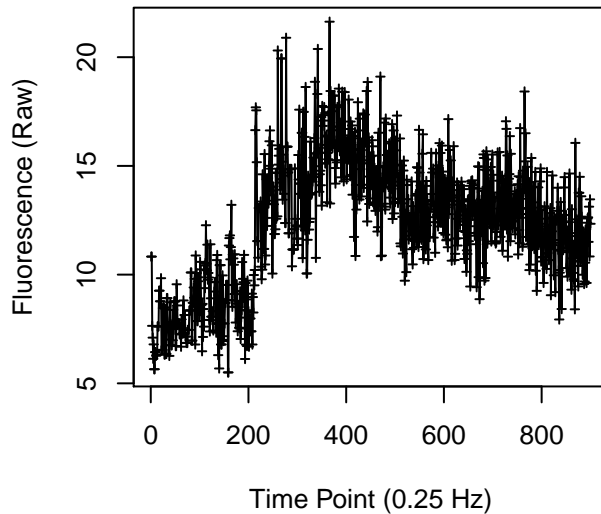

**Cell 2333**

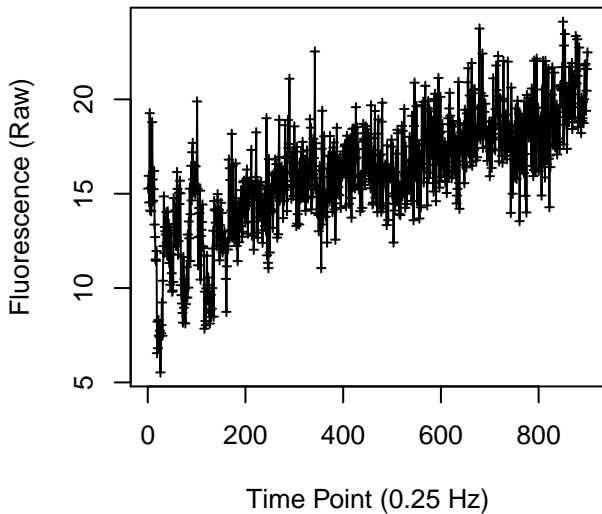

**Cell 2334**

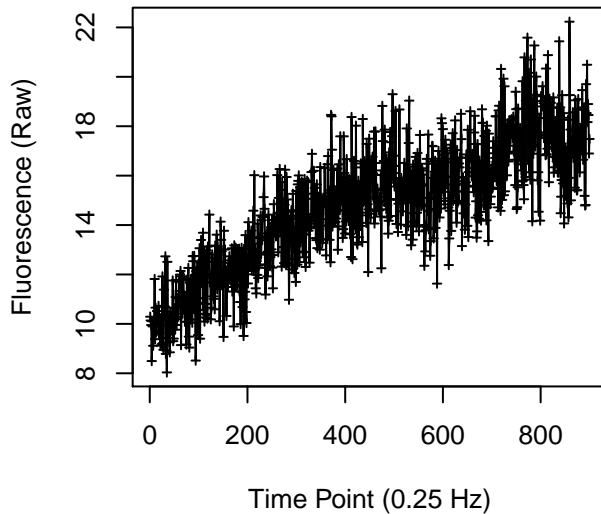

**Cell 2335**

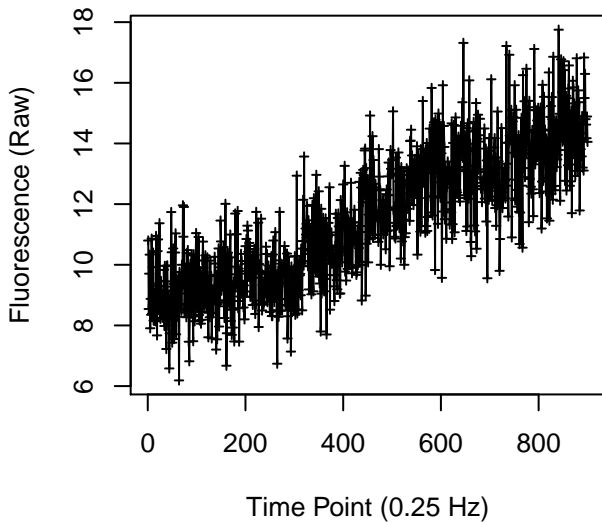

**Cell 2336**

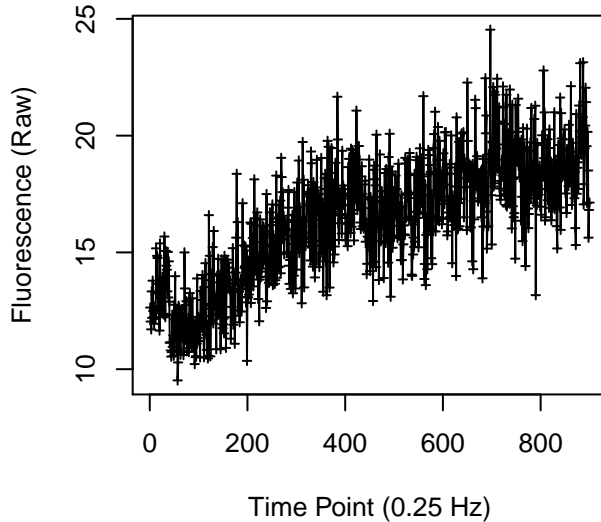

**Cell 2337**

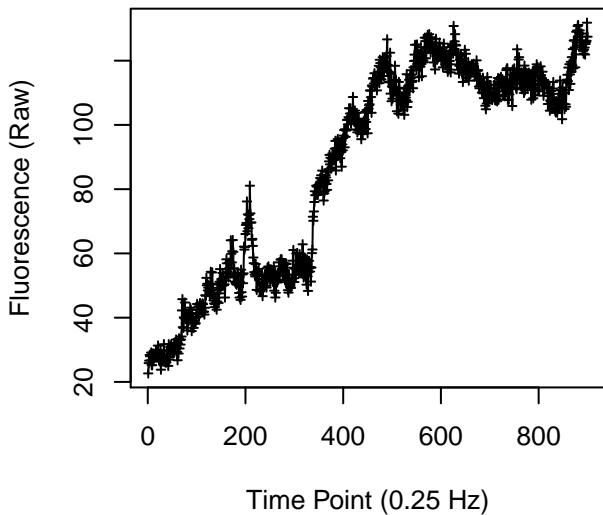

**Cell 2338**

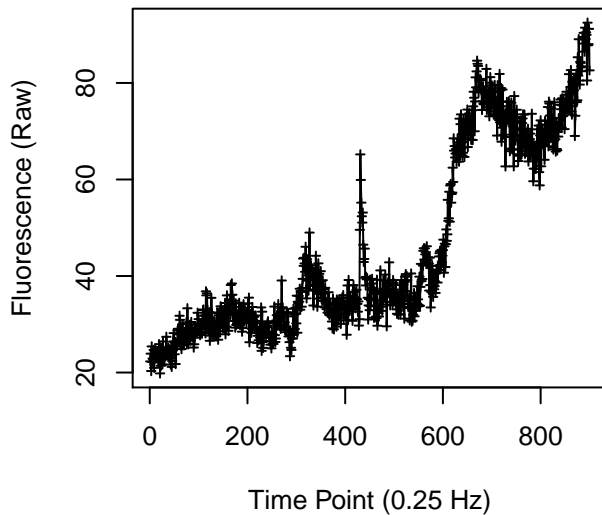

**Cell 2339**

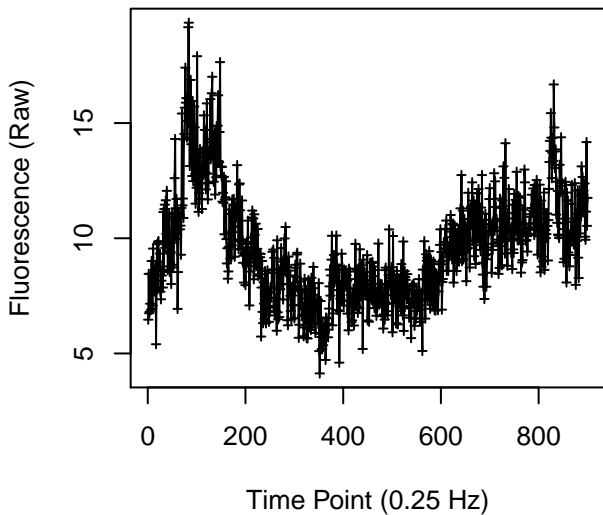

**Cell 2340**

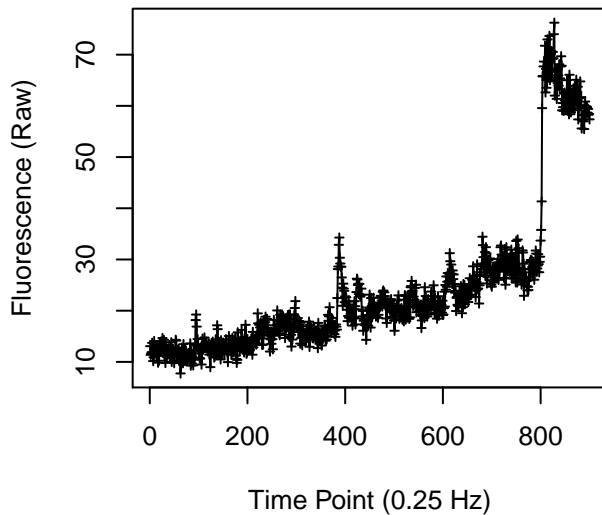

**Cell 2341**

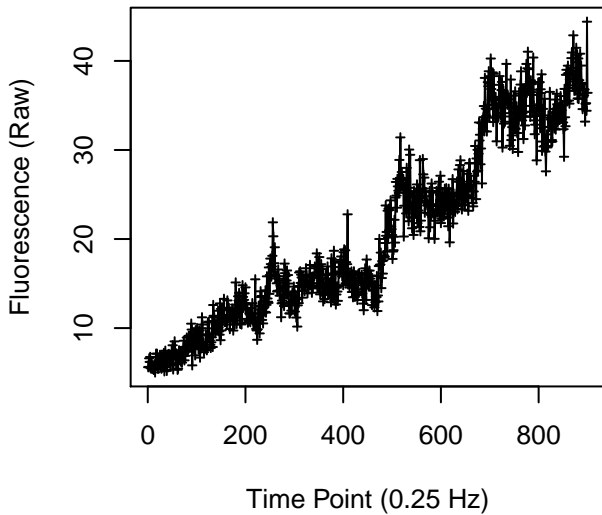

**Cell 2342**

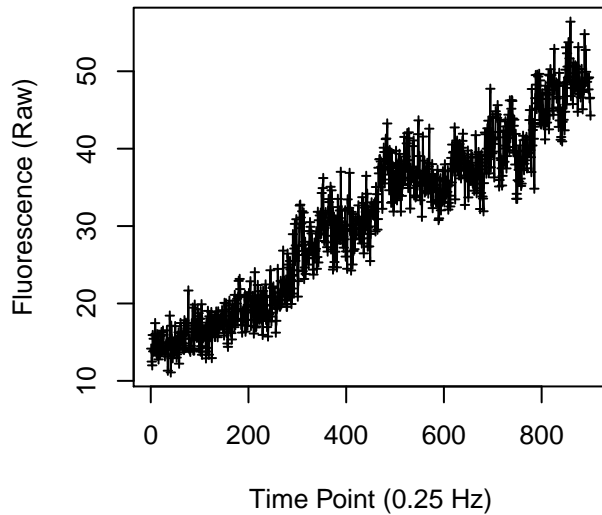

**Cell 2343**

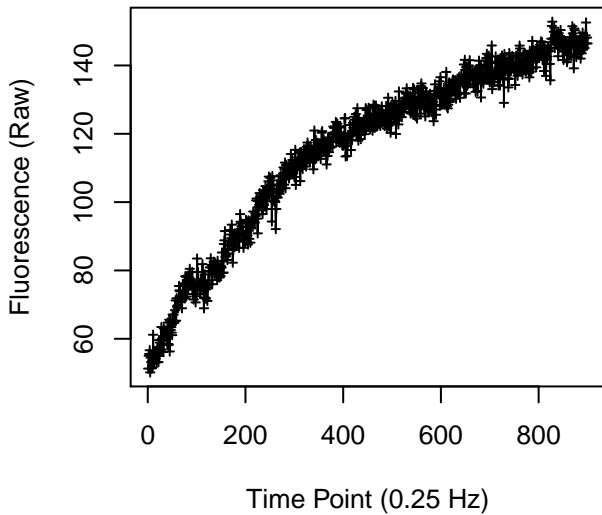

**Cell 2344**

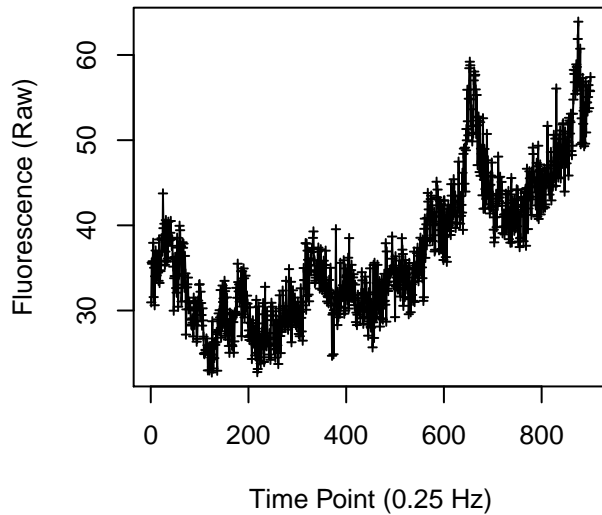



**Cell 2345**

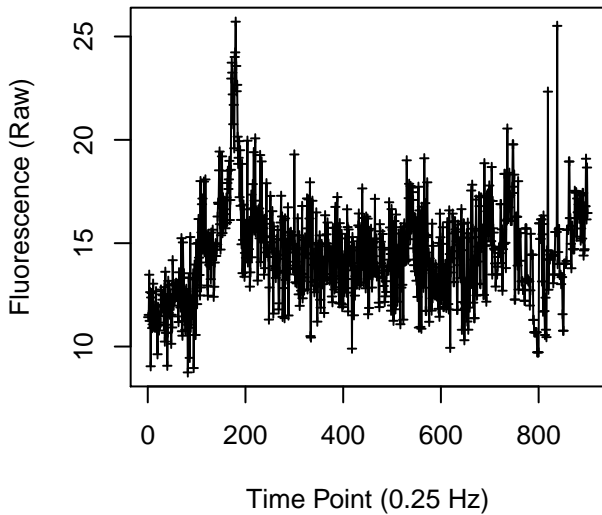

**Cell 2346**

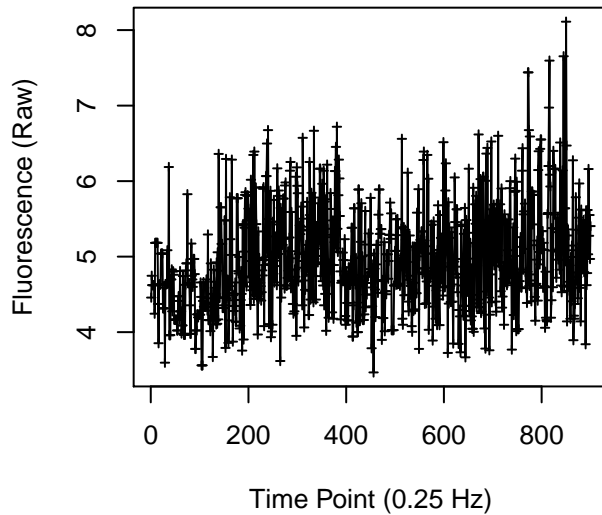

**Cell 2347**

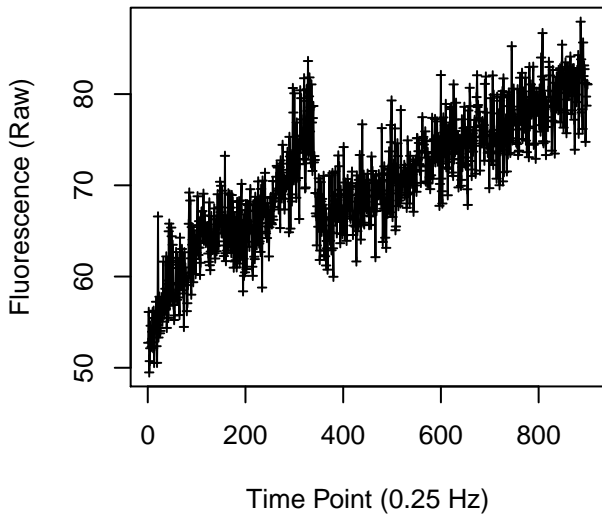

**Cell 2348**

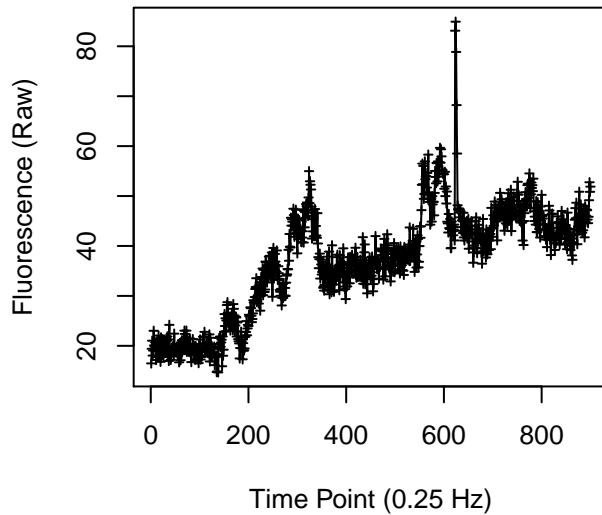

**Cell 2349**

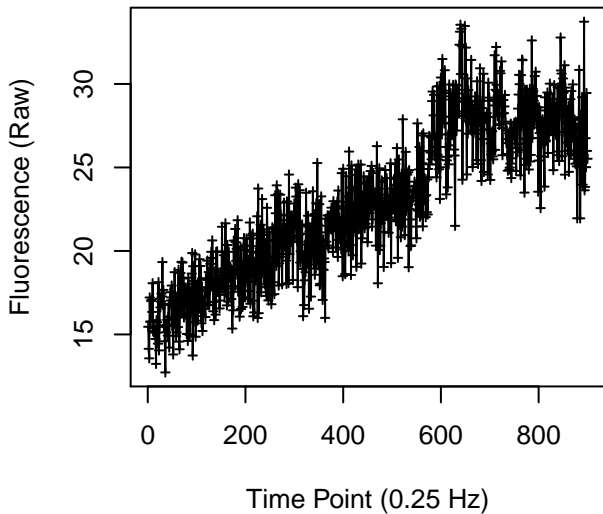

**Cell 2350**

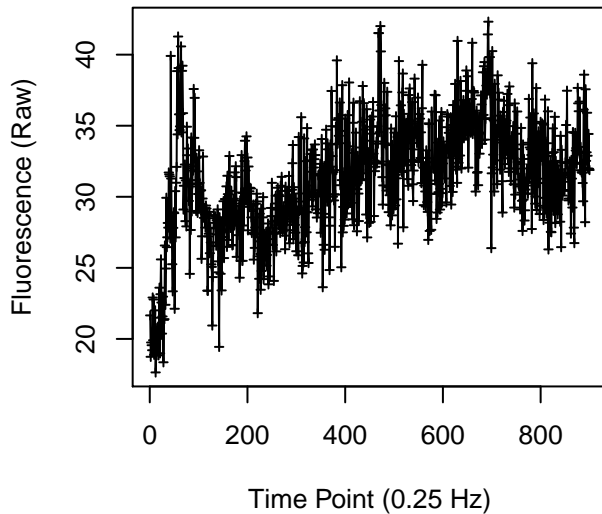

**Cell 2351**

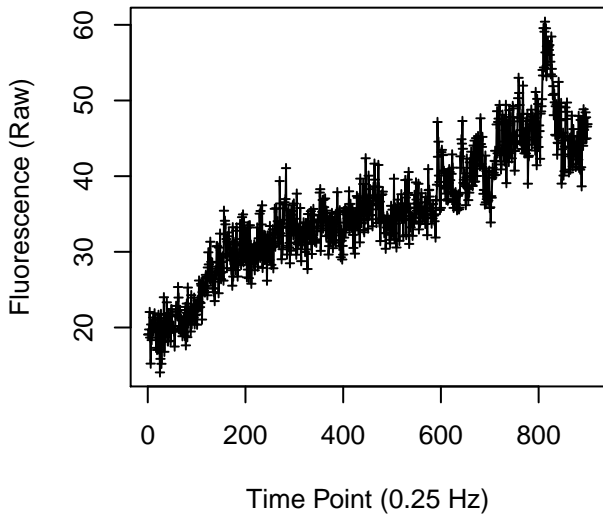

**Cell 2352**

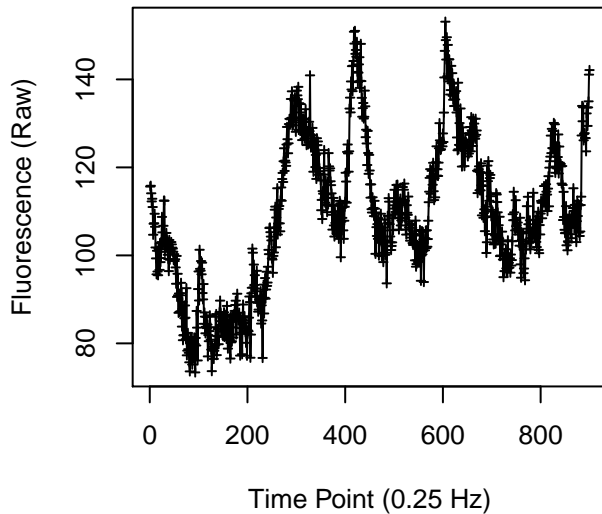

**Cell 2353**

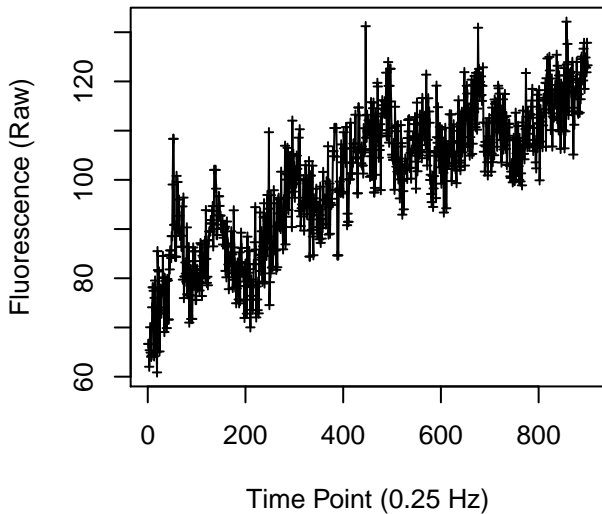

**Cell 2354**

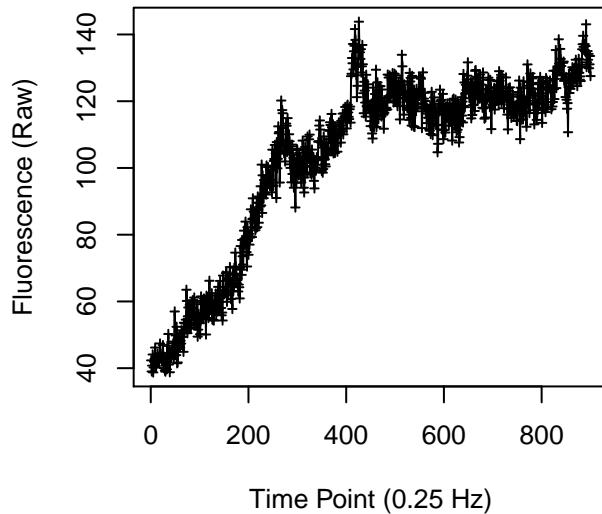

**Cell 2355**

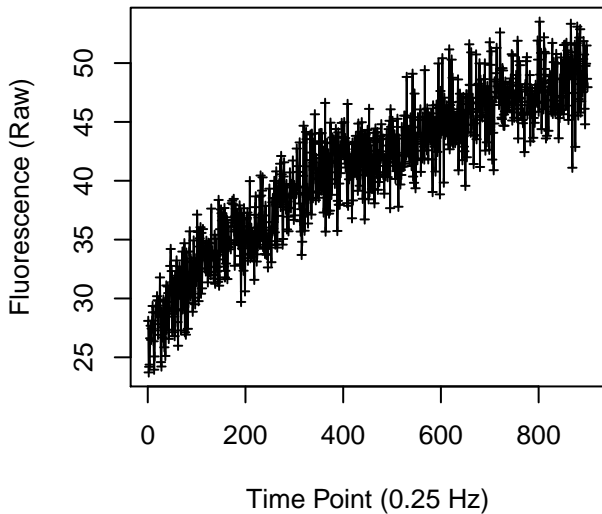

**Cell 2356**

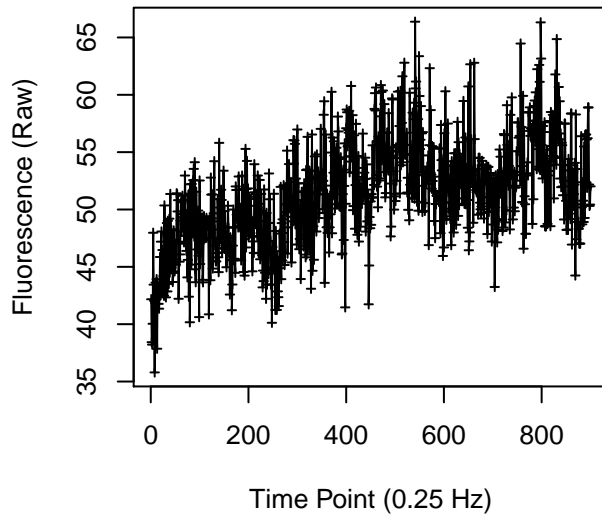

**Cell 2357**

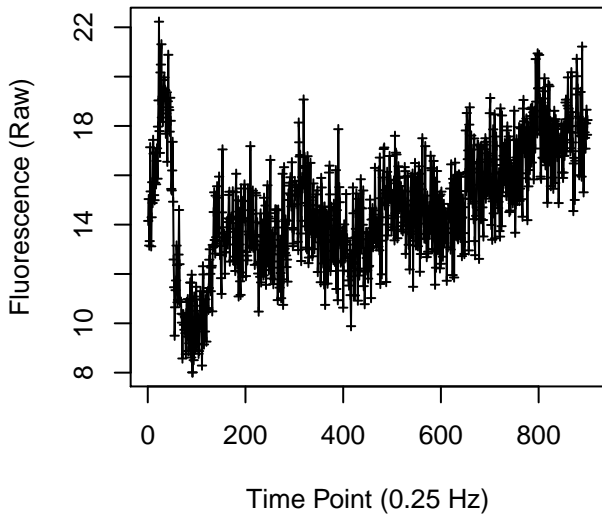

**Cell 2358**

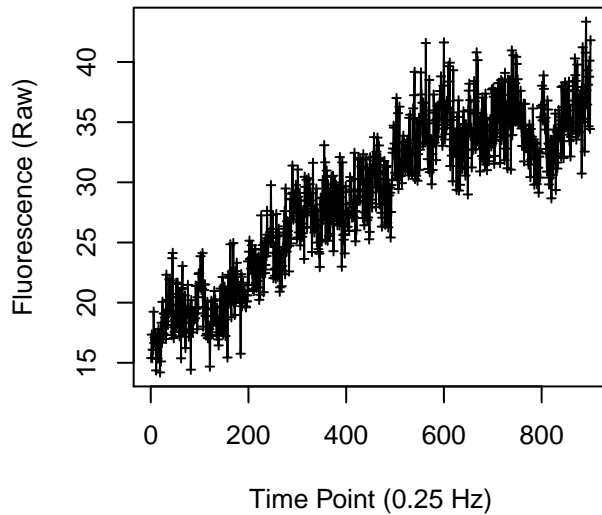

**Cell 2359**

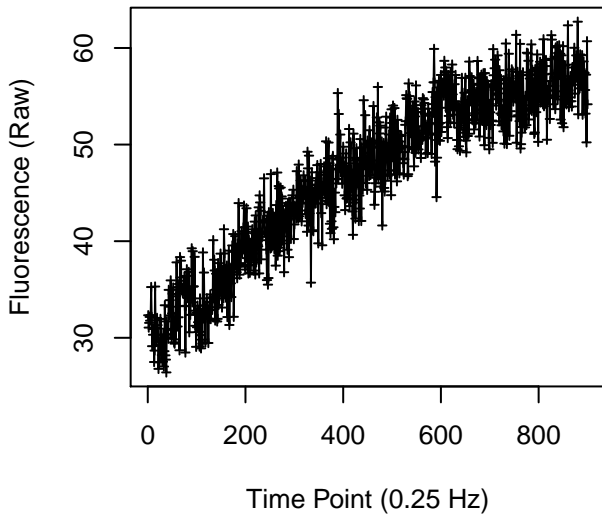

**Cell 2360**

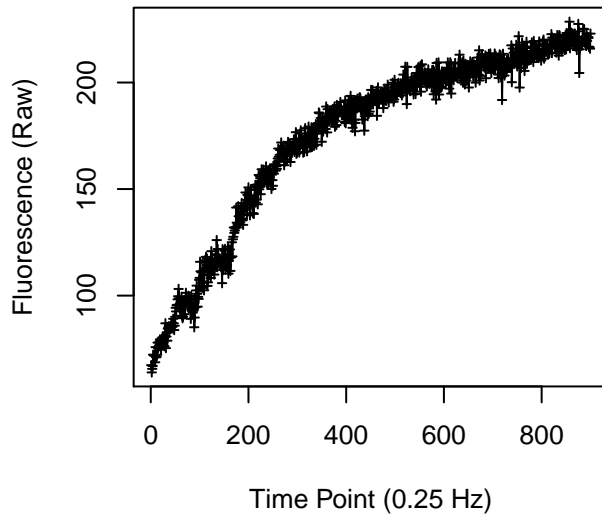

**Cell 2361**

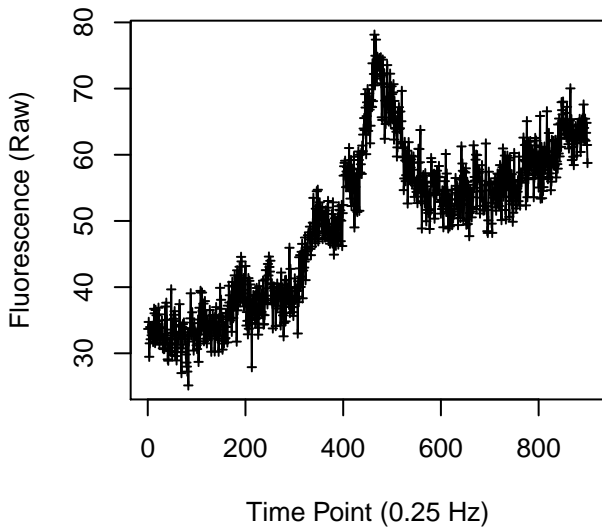

**Cell 2362**

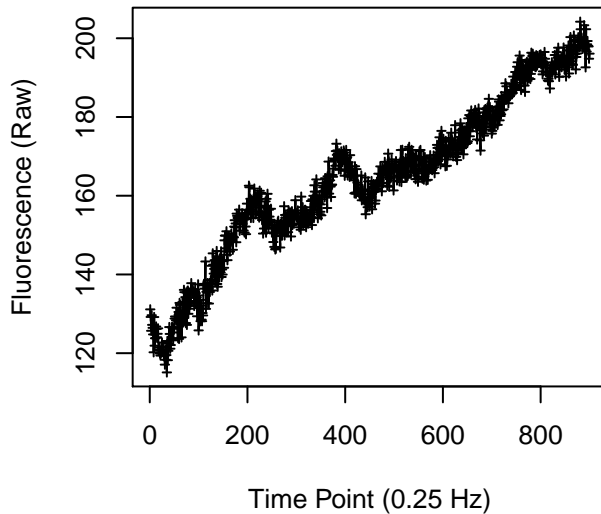

**Cell 2363**

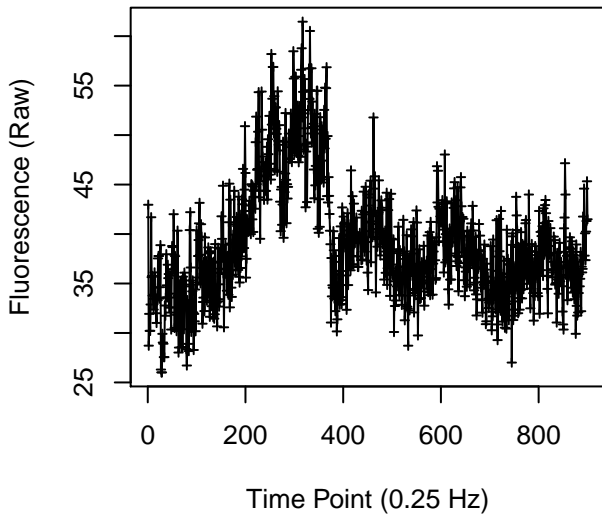

**Cell 2364**

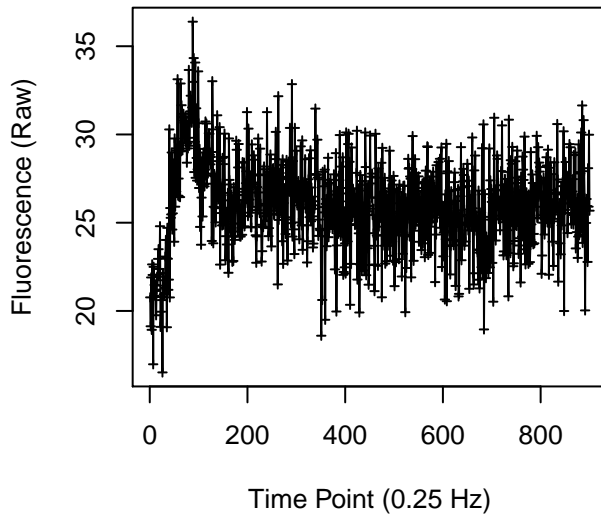

**Cell 2365**

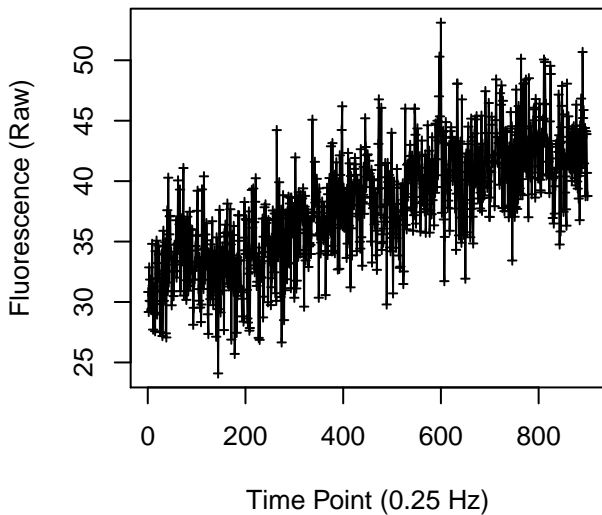

**Cell 2366**

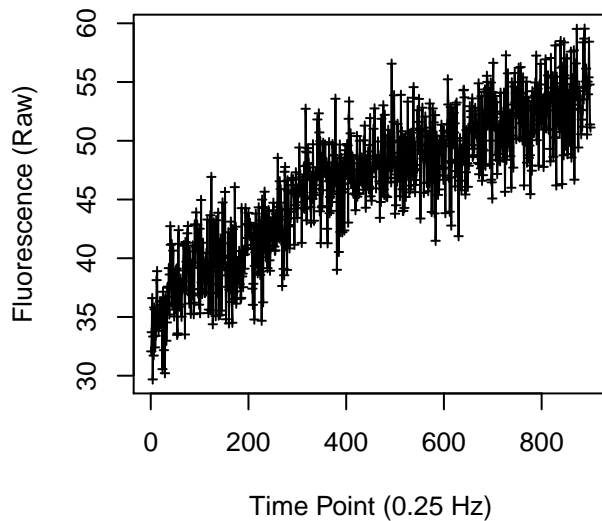

**Cell 2367**

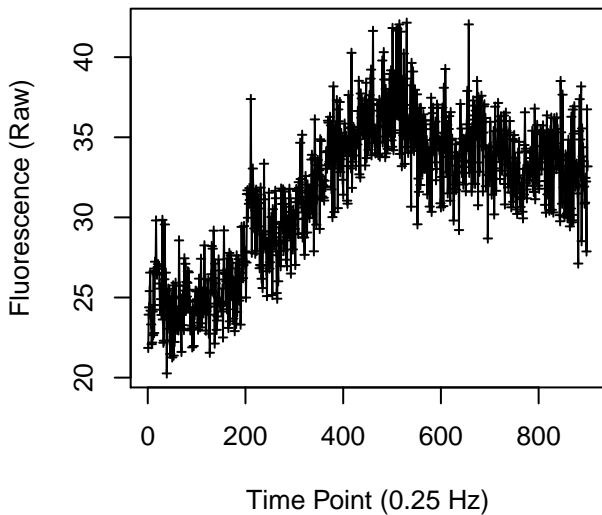

**Cell 2368**

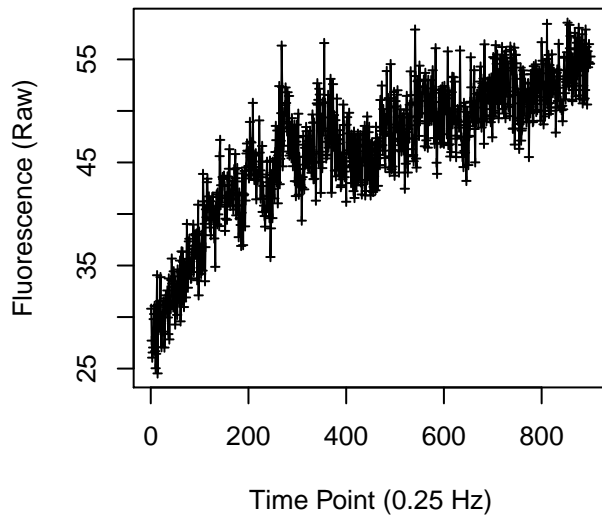

**Cell 2369**

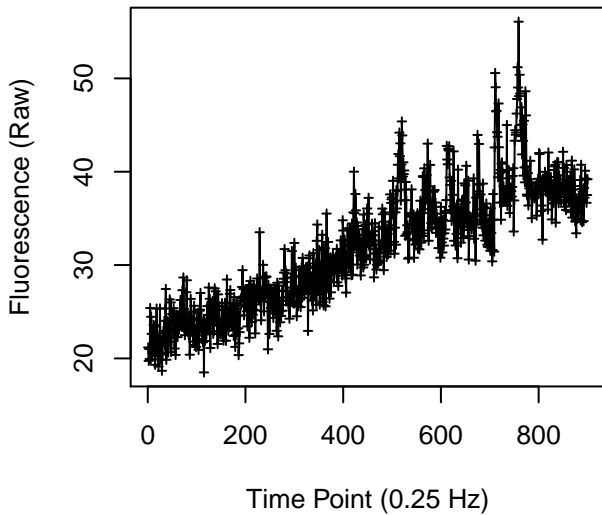

**Cell 2370**

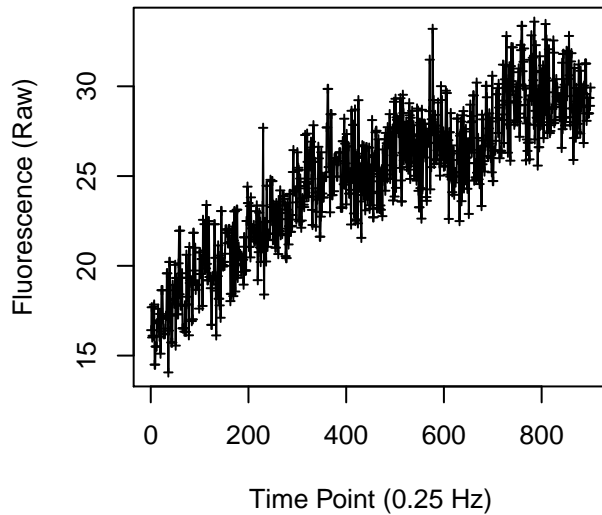

**Cell 2371**

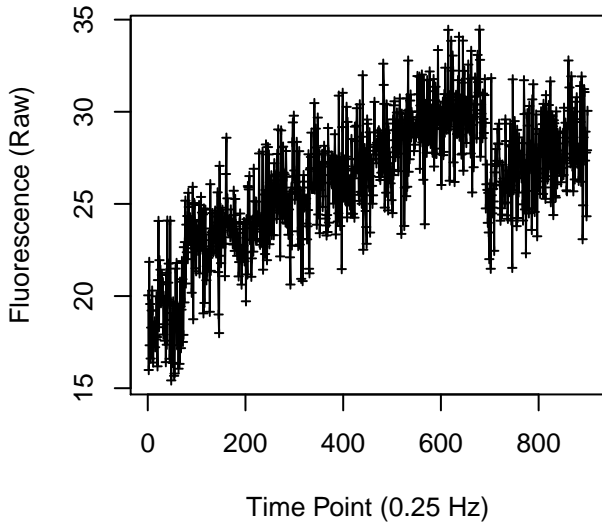

**Cell 2372**

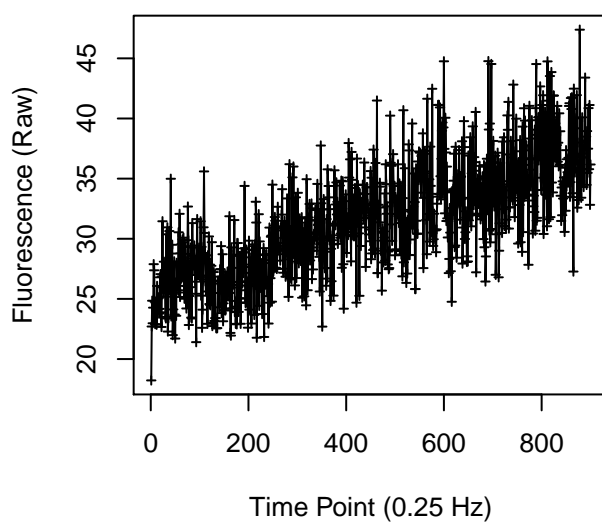

**Cell 2373**

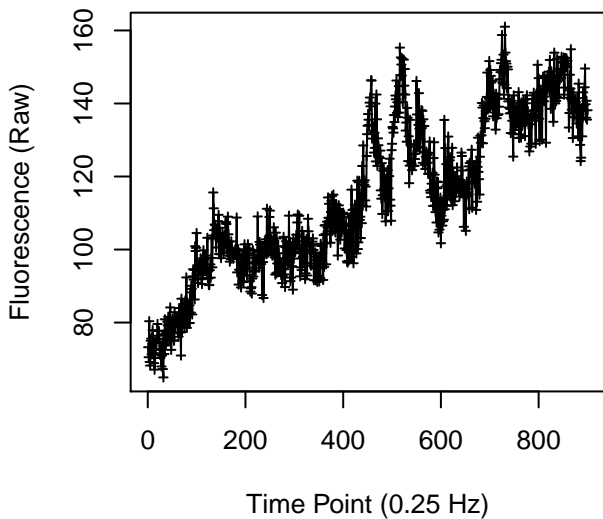

**Cell 2374**

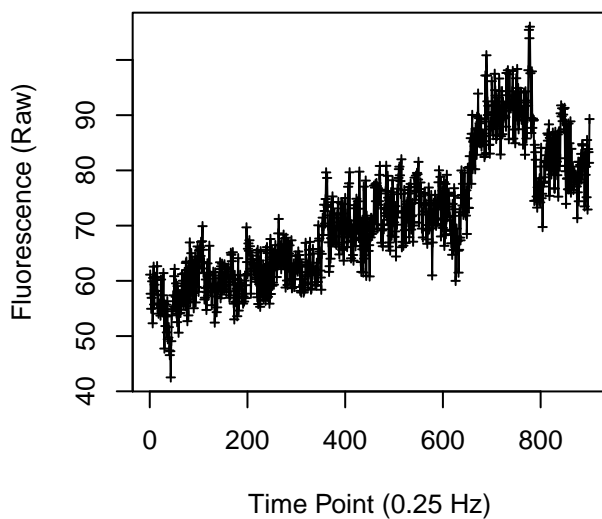

**Cell 2375**

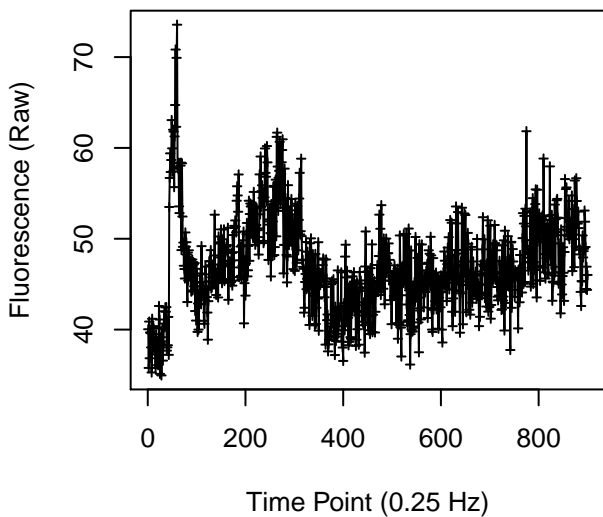

**Cell 2376**

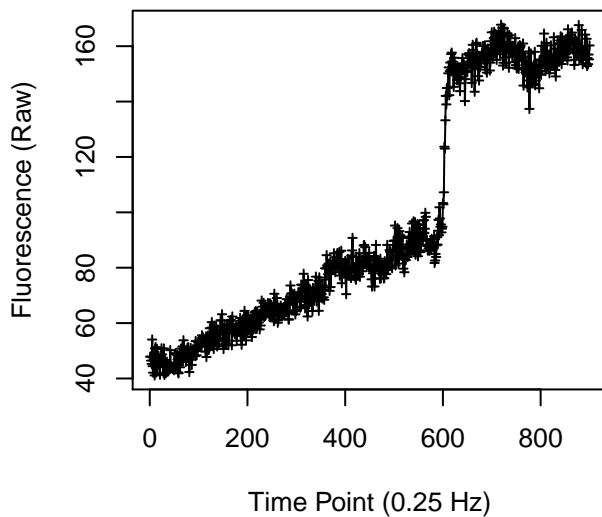



**Cell 2377**

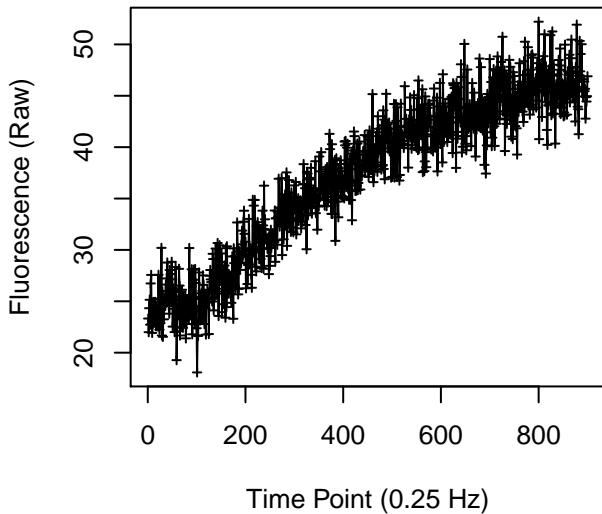

**Cell 2378**

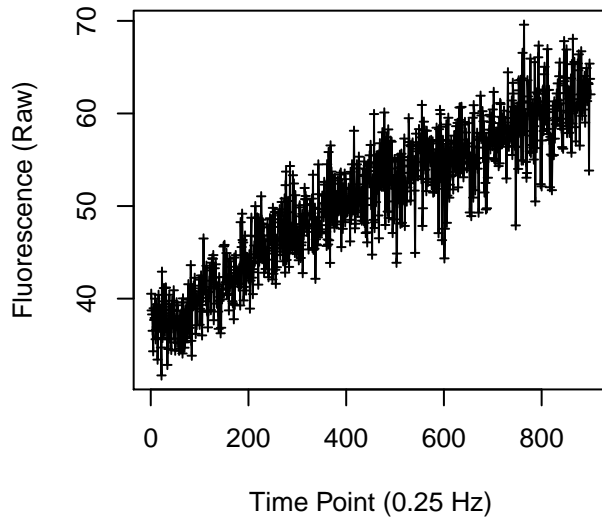

**Cell 2379**

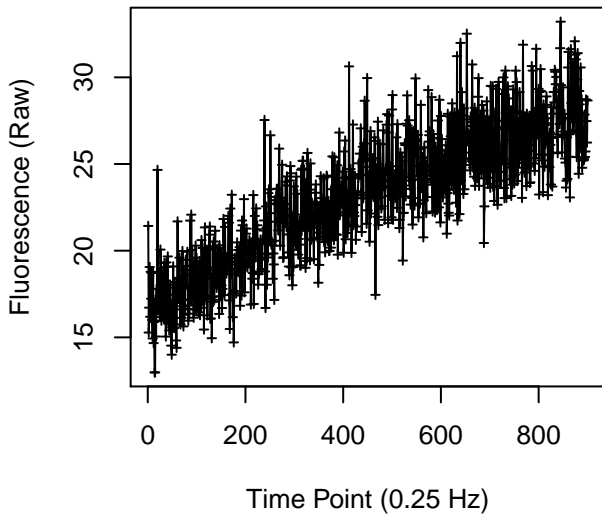

**Cell 2380**

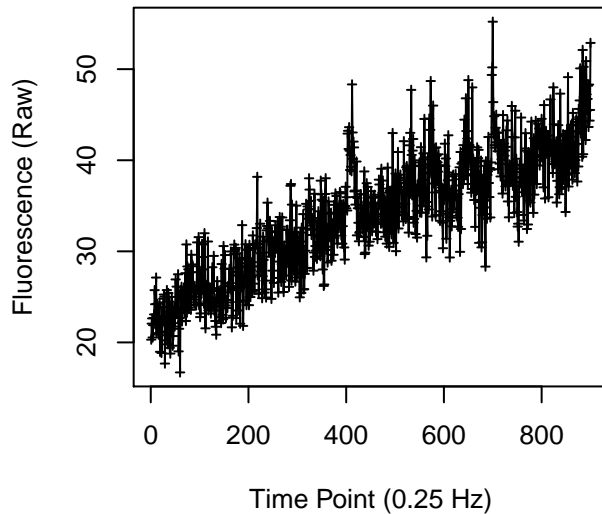

**Cell 2381**

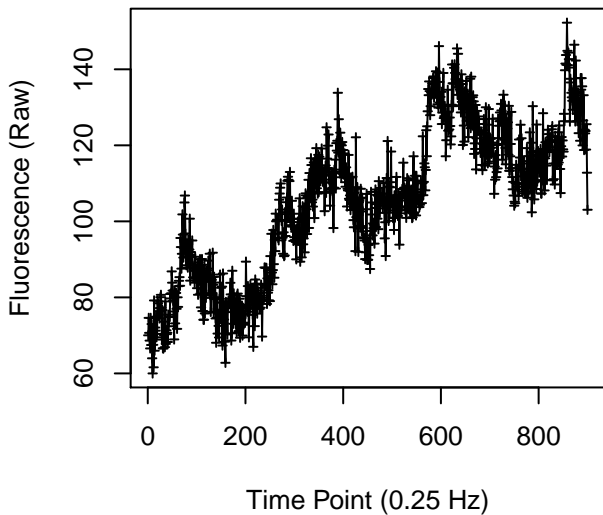

**Cell 2382**

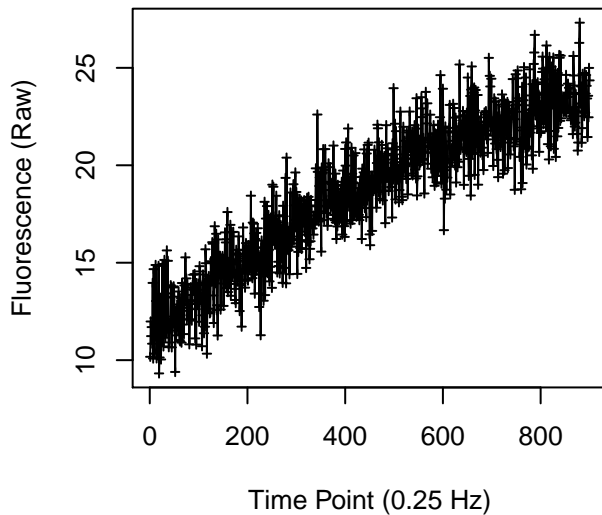

**Cell 2383**

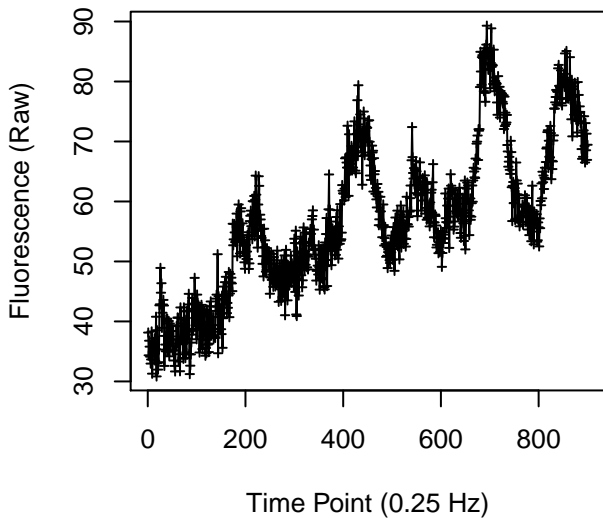

**Cell 2384**

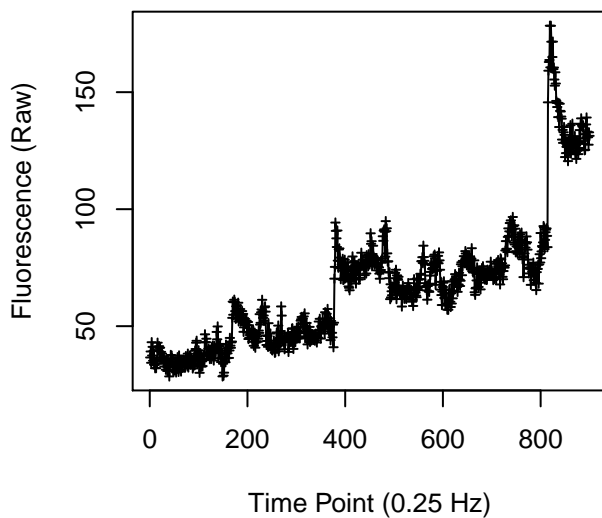

**Cell 2385**

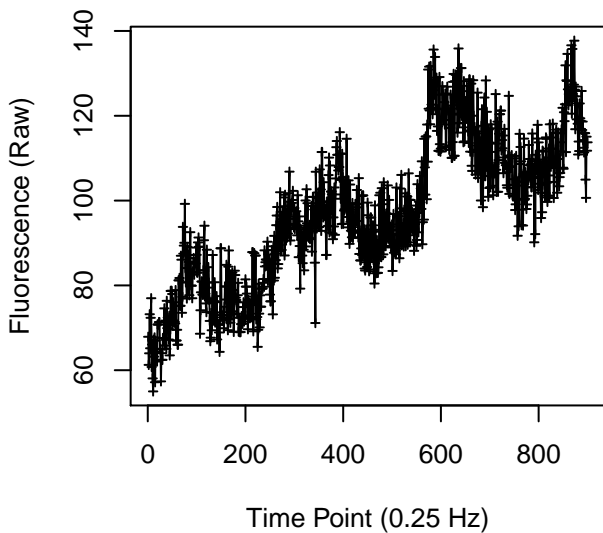

**Cell 2386**

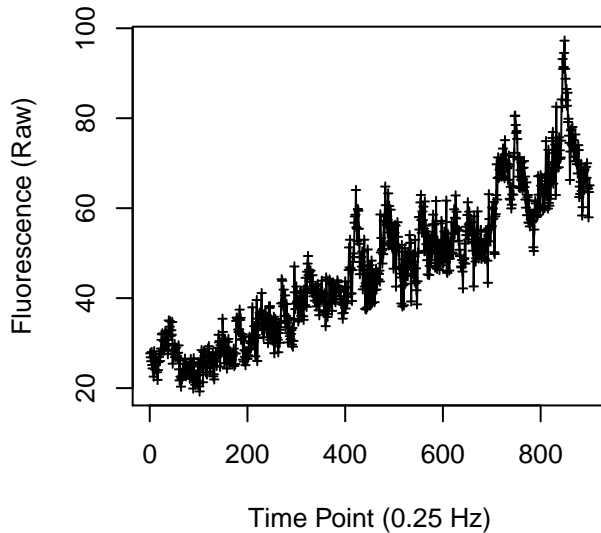

**Cell 2387**

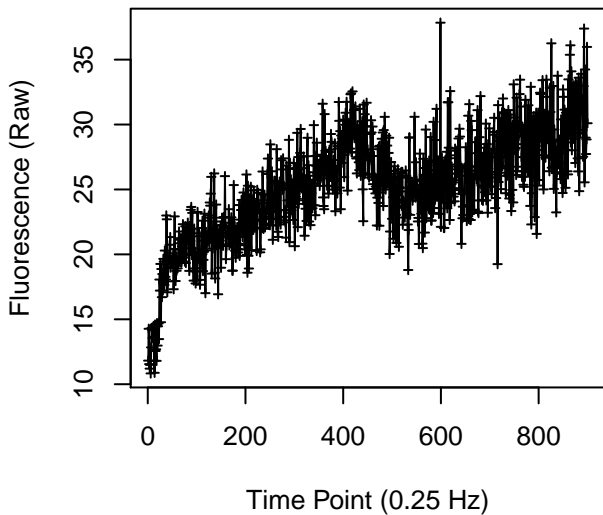

**Cell 2388**

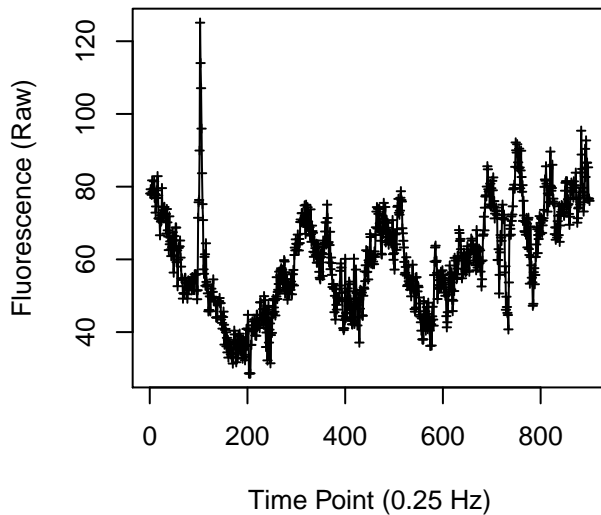

**Cell 2389**

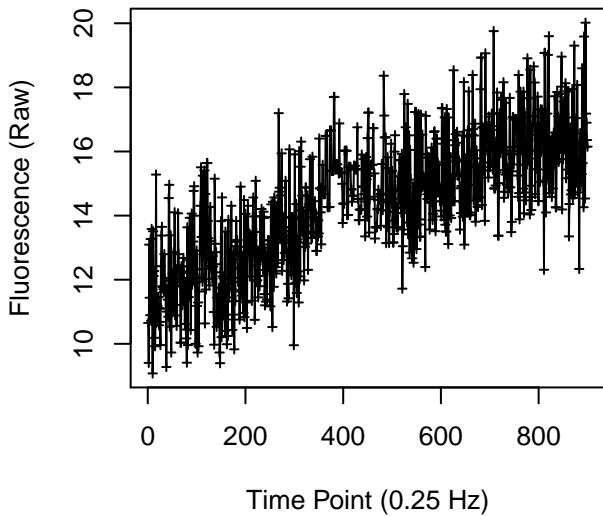

**Cell 2390**

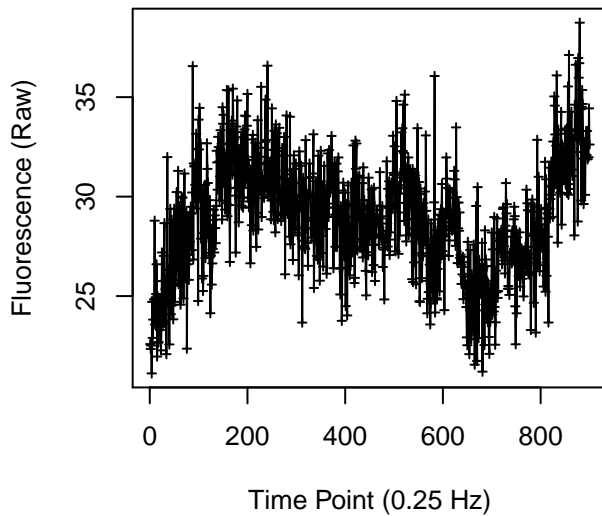

**Cell 2391**

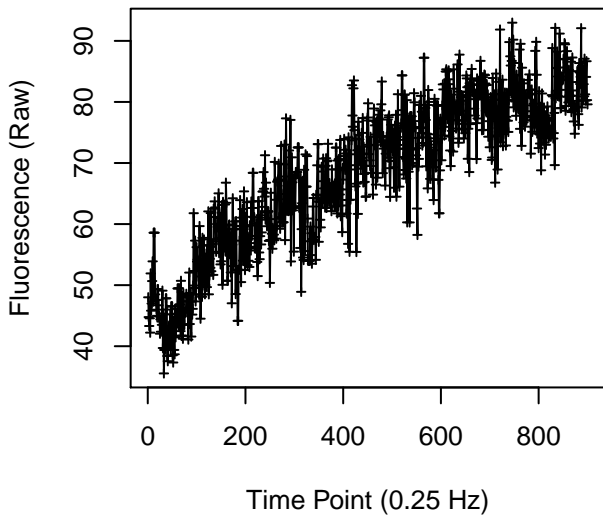

**Cell 2392**

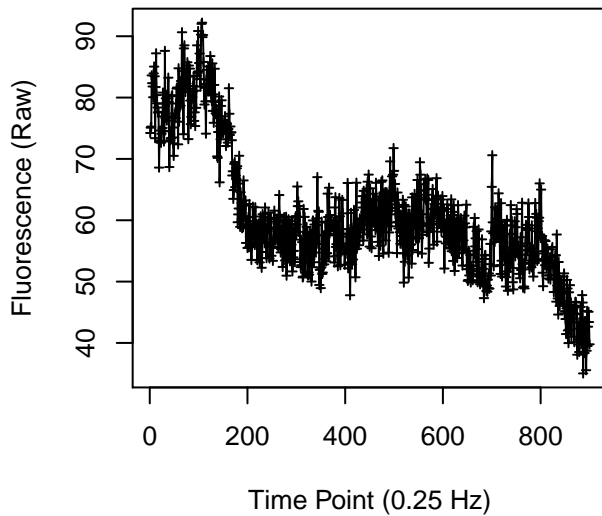

**Cell 2393**

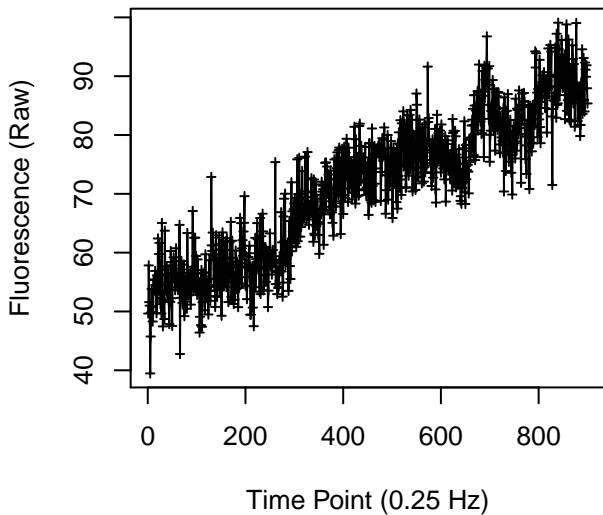

**Cell 2394**

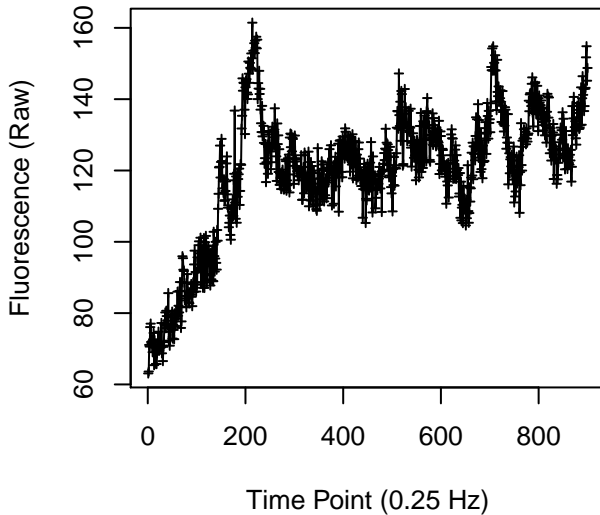

**Cell 2395**

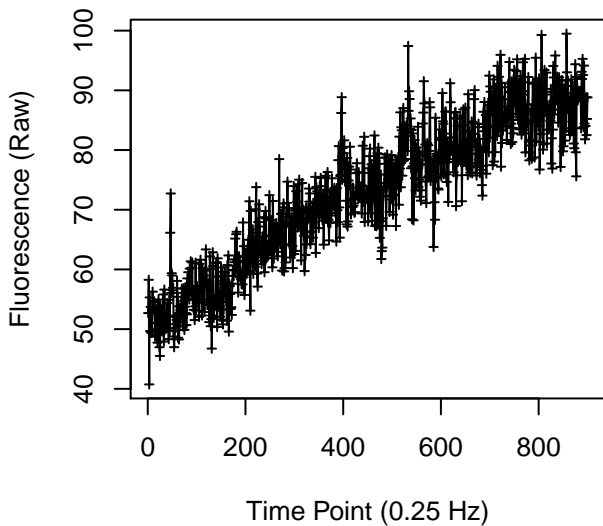

**Cell 2396**

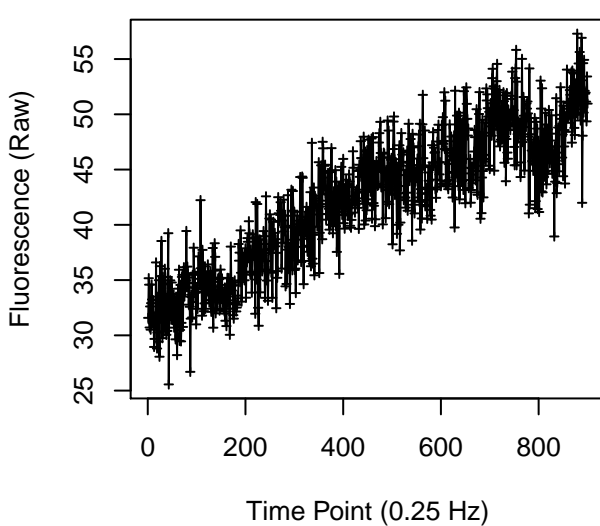

**Cell 2397**

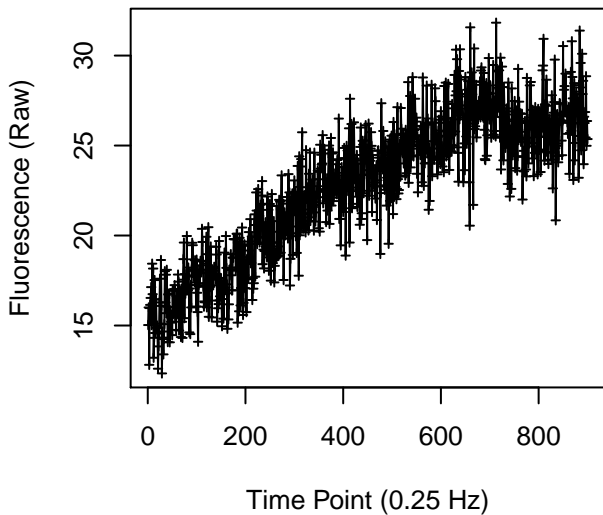

**Cell 2398**

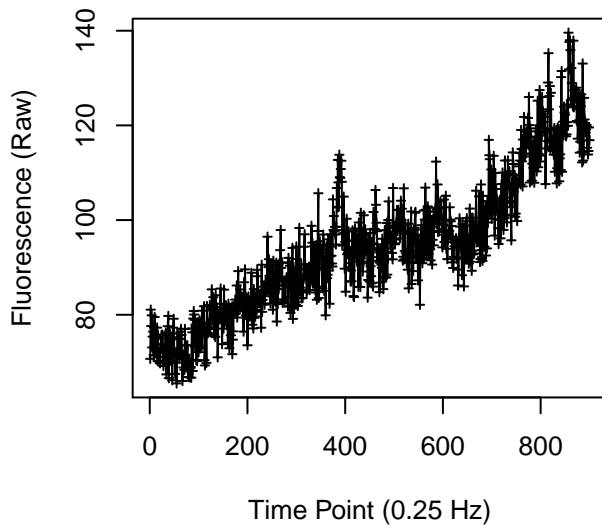

**Cell 2399**

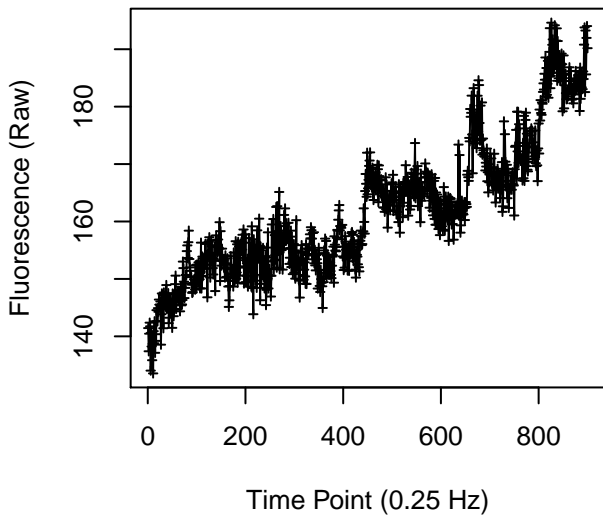

**Cell 2400**

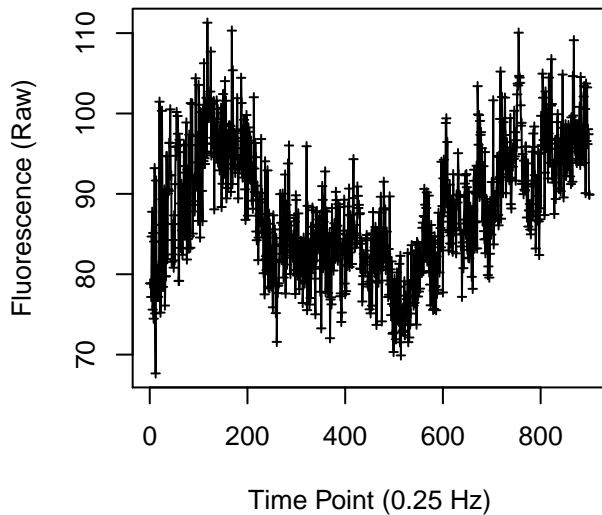

**Cell 2401**

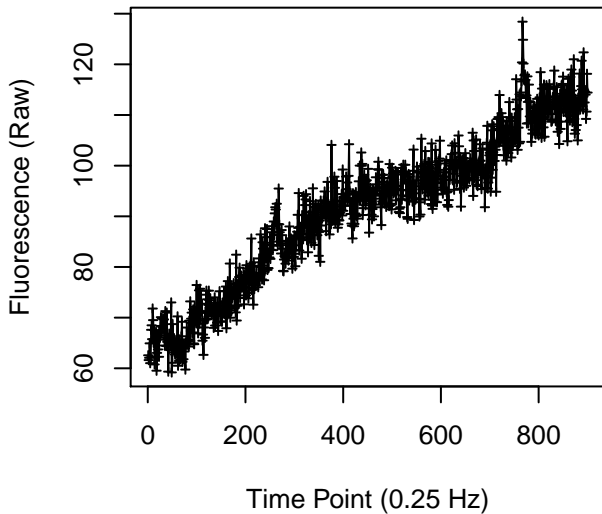

**Cell 2402**

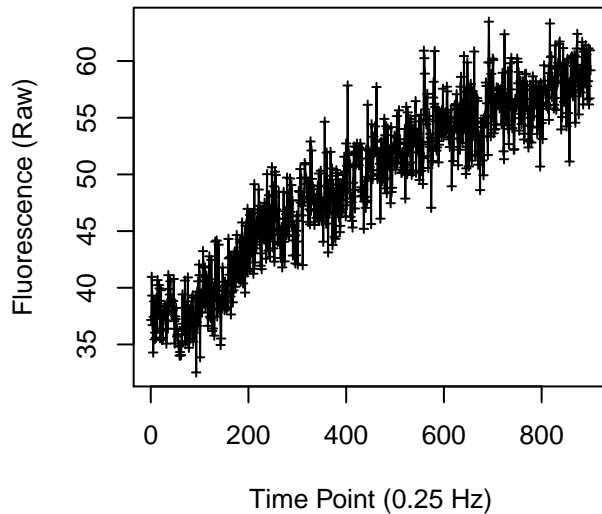

**Cell 2403**

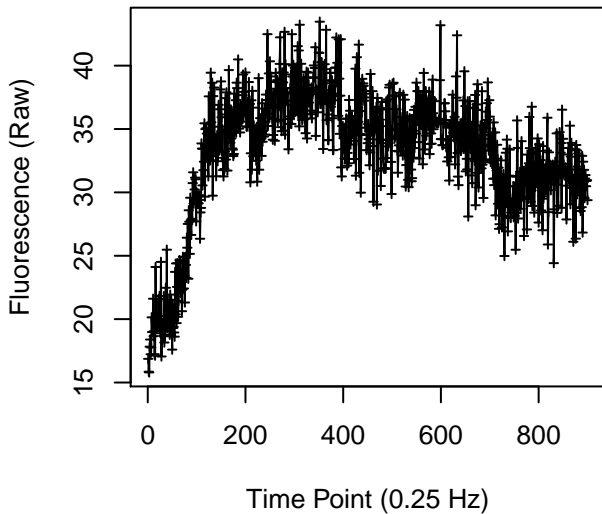

**Cell 2404**

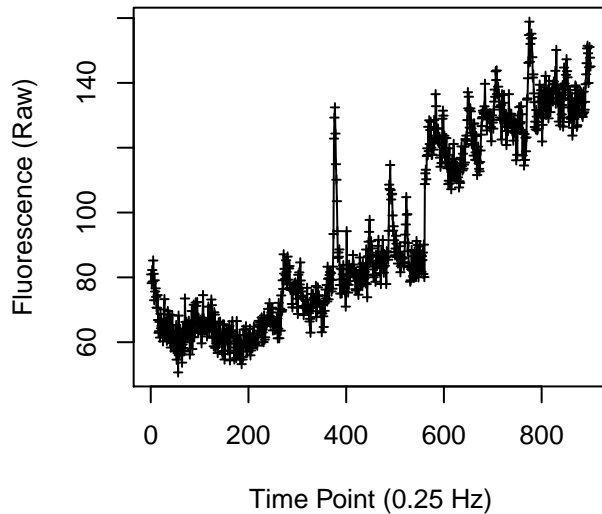

**Cell 2405**

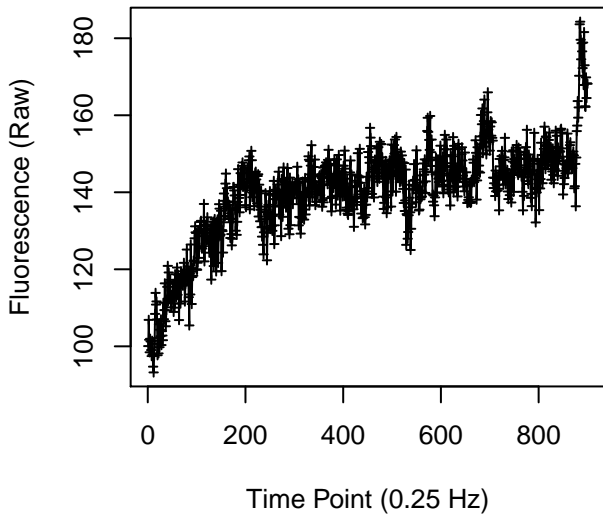

**Cell 2406**

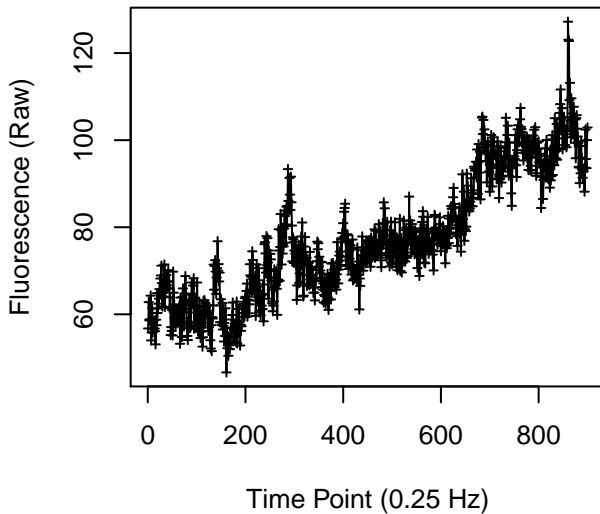

**Cell 2407**

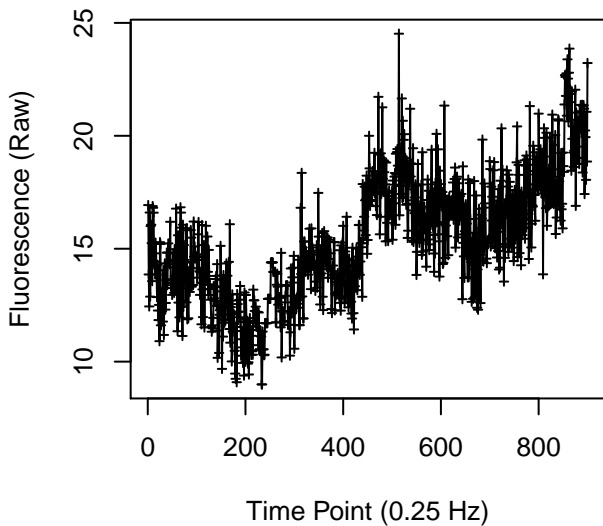

**Cell 2408**

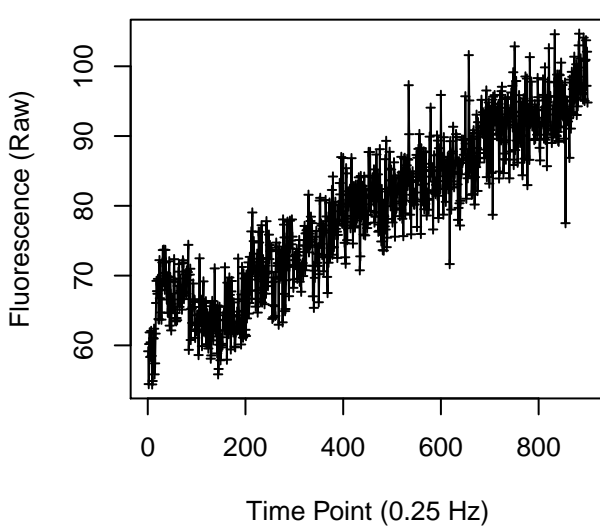



**Cell 2409**

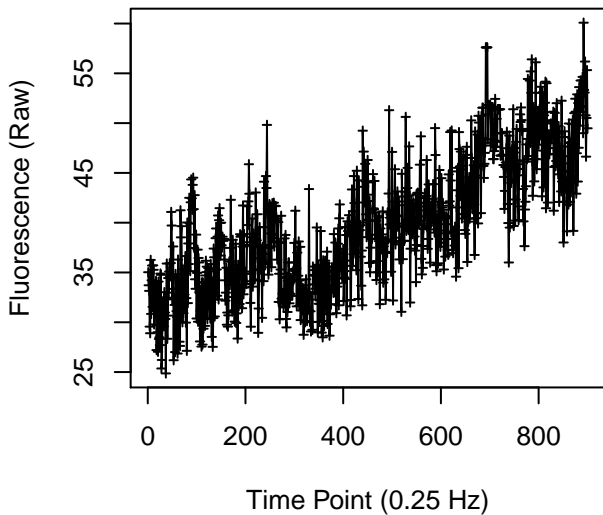

**Cell 2410**

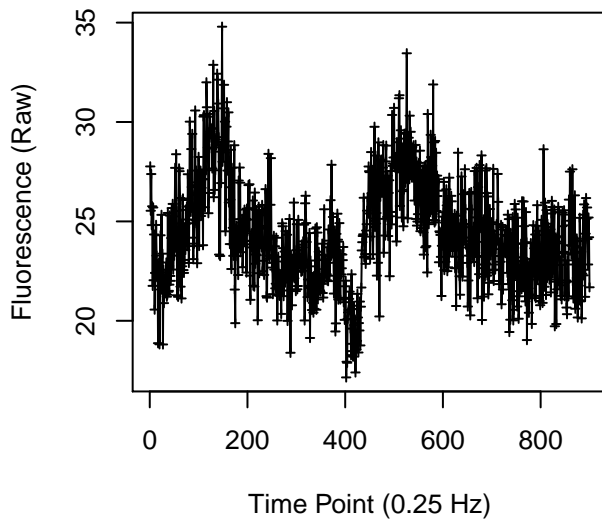

**Cell 2411**

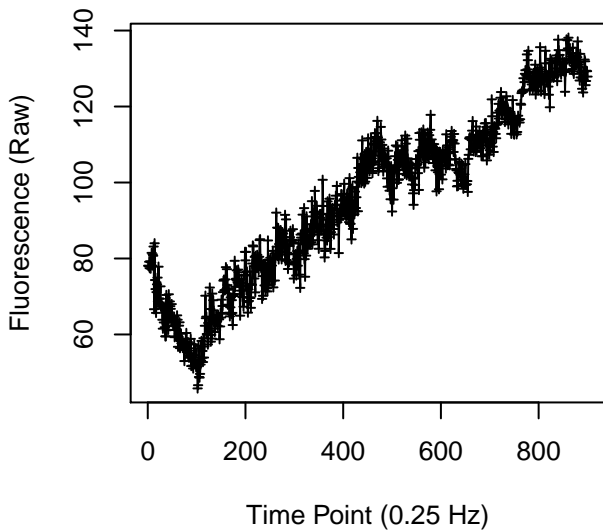

**Cell 2412**

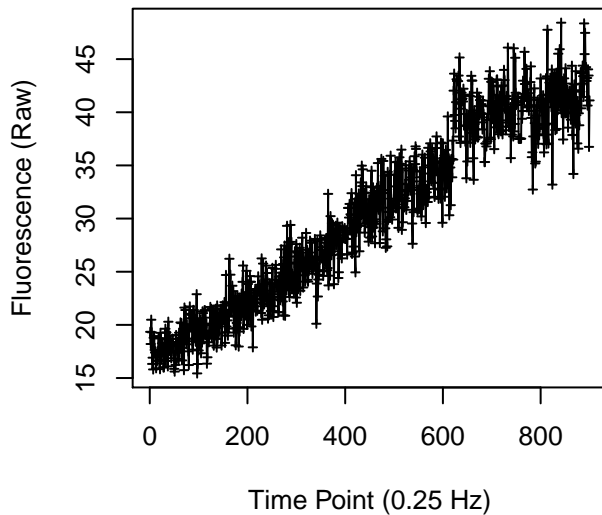

**Cell 2413**

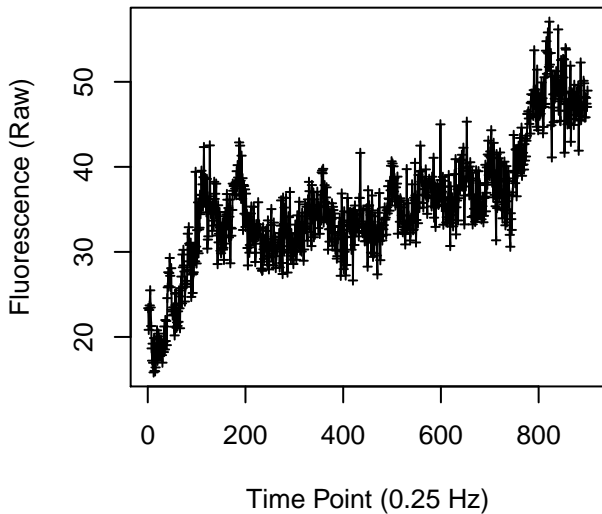

**Cell 2414**

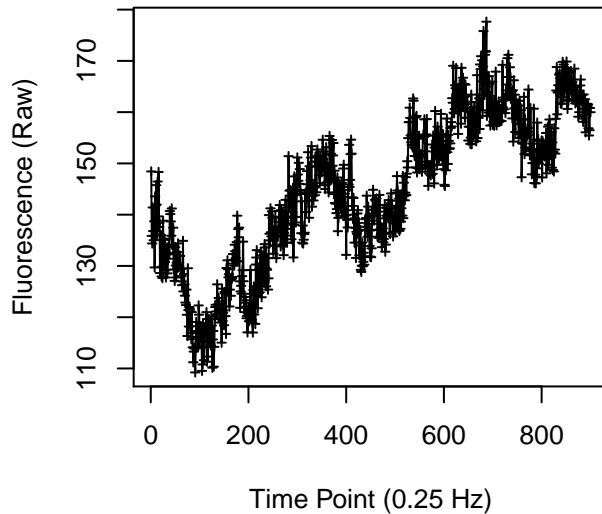

**Cell 2415**

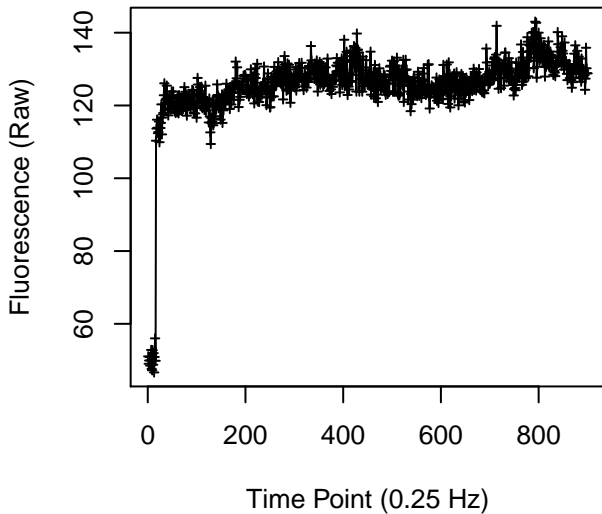

**Cell 2416**

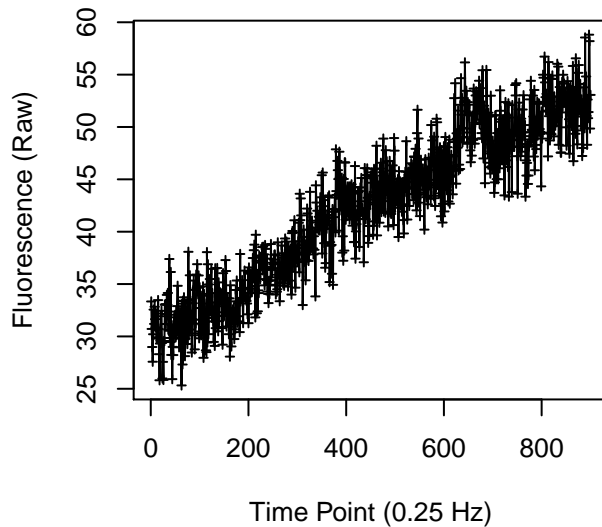

**Cell 2417**

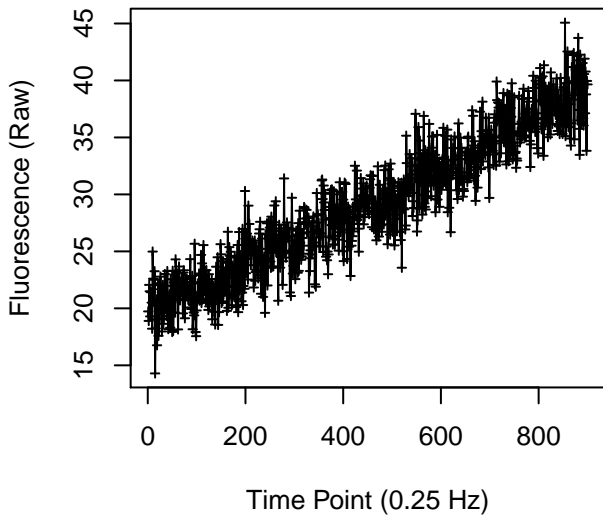

**Cell 2418**

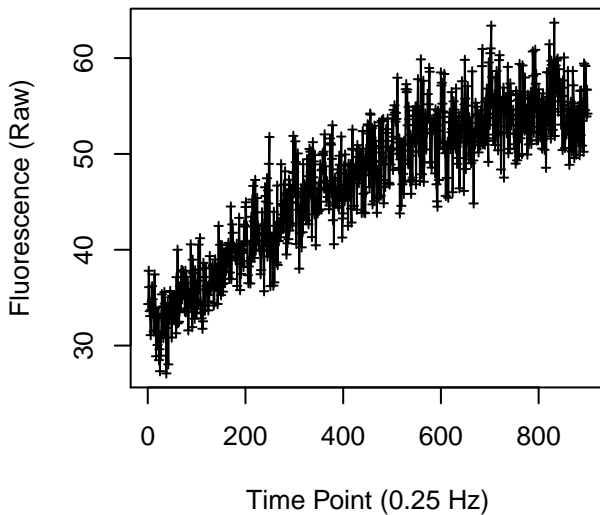

**Cell 2419**

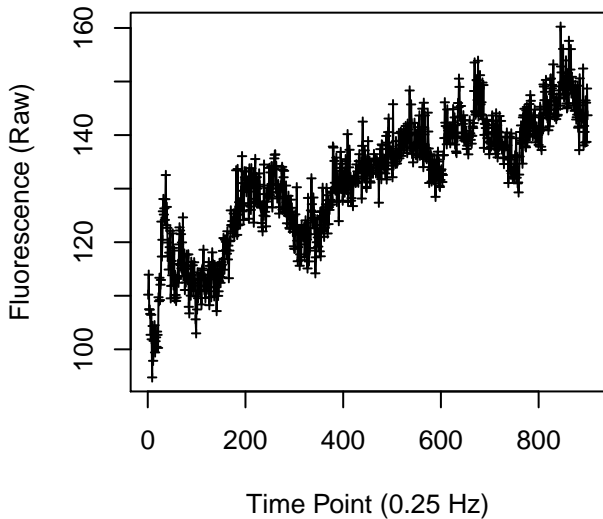

**Cell 2420**

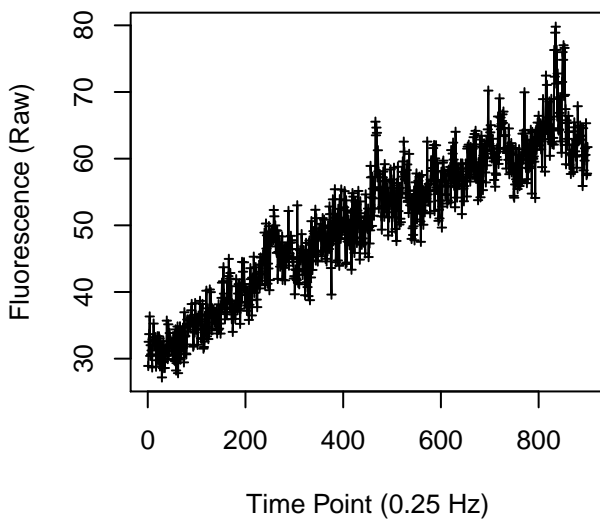

**Cell 2421**

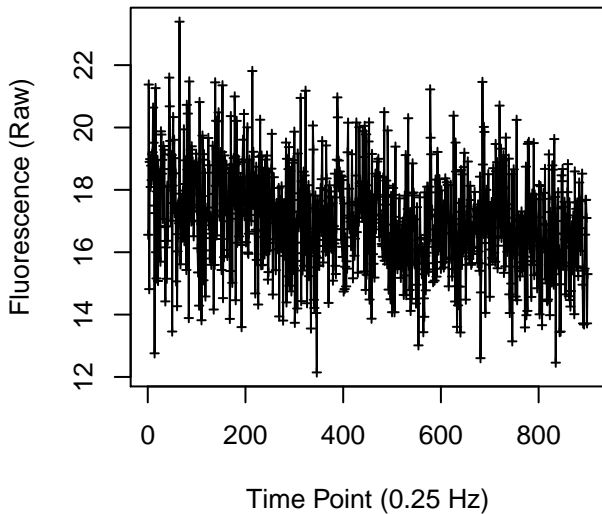

**Cell 2422**

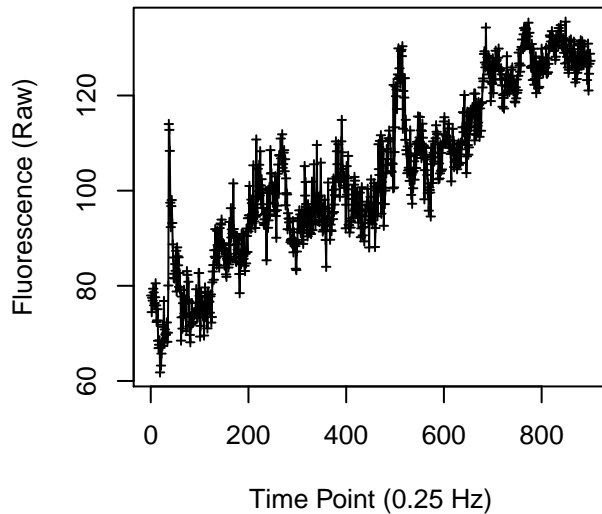

**Cell 2423**

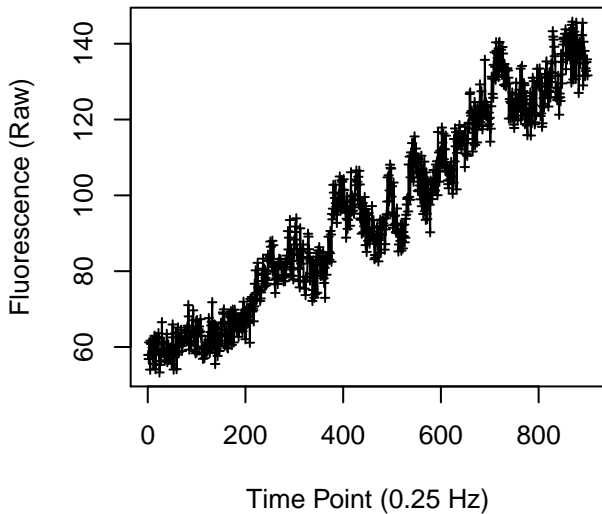

**Cell 2424**

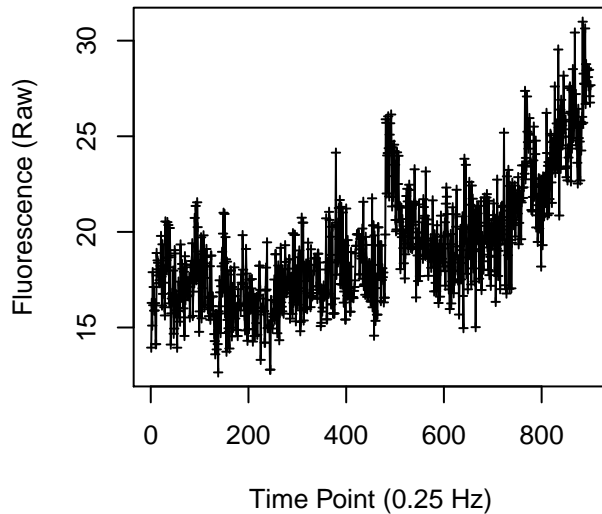

**Cell 2425**

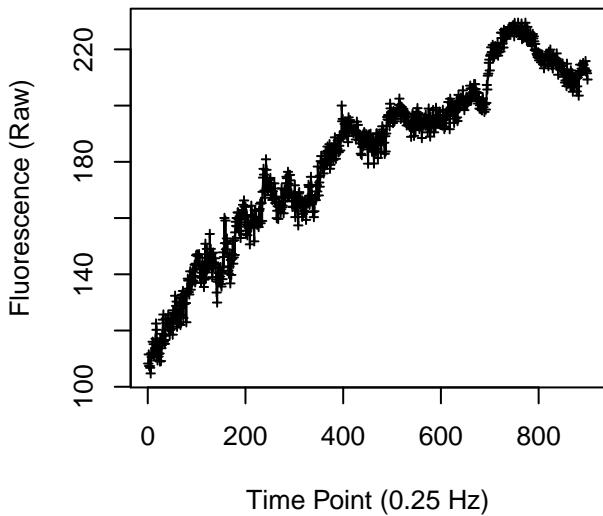

**Cell 2426**

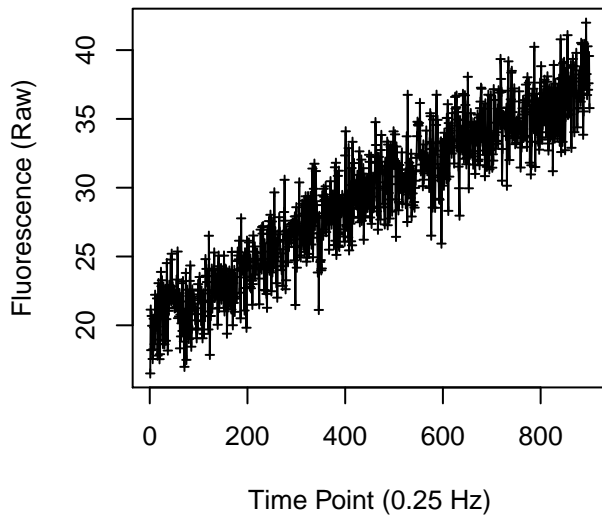

**Cell 2427**

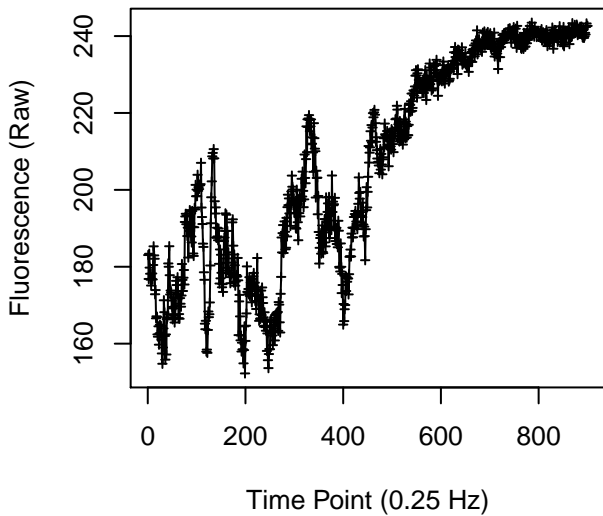

**Cell 2428**

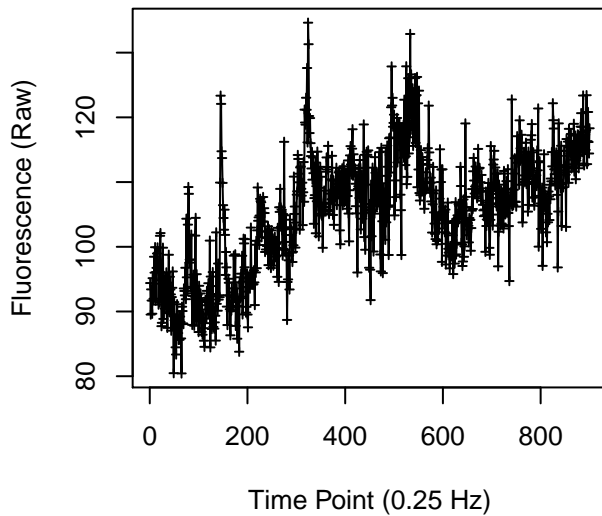

**Cell 2429**

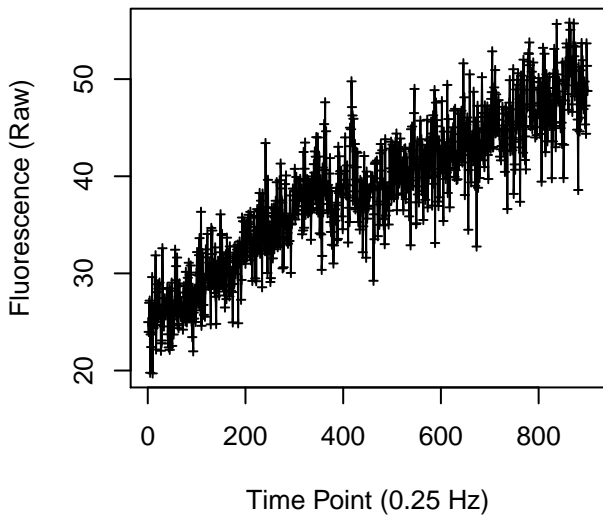

**Cell 2430**

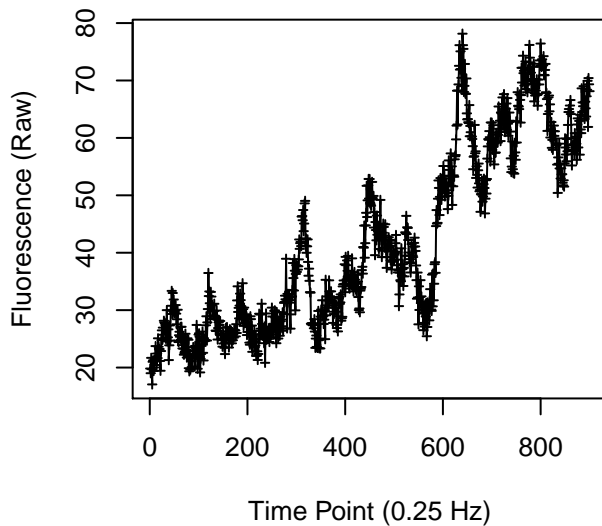

**Cell 2431**

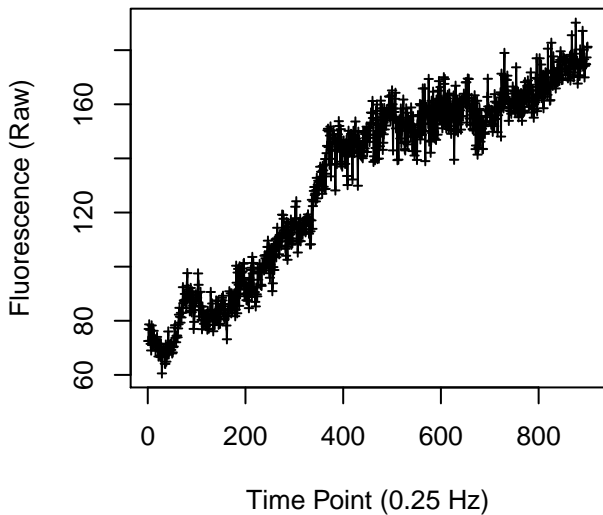

**Cell 2432**

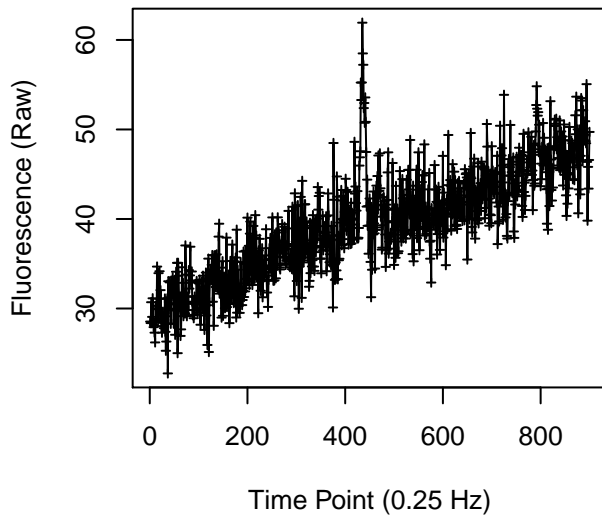

**Cell 2433**

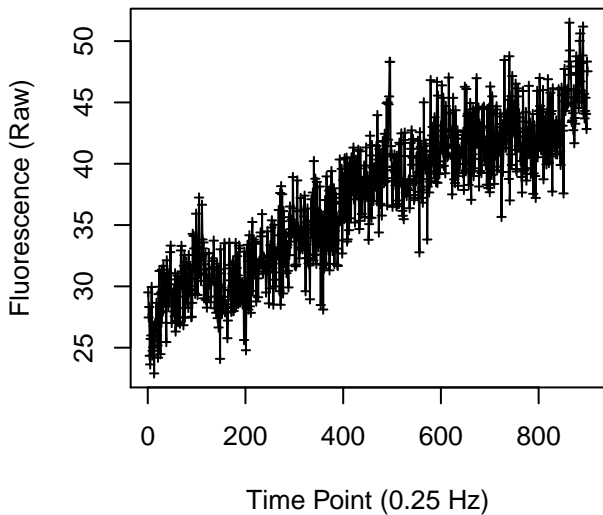

**Cell 2434**

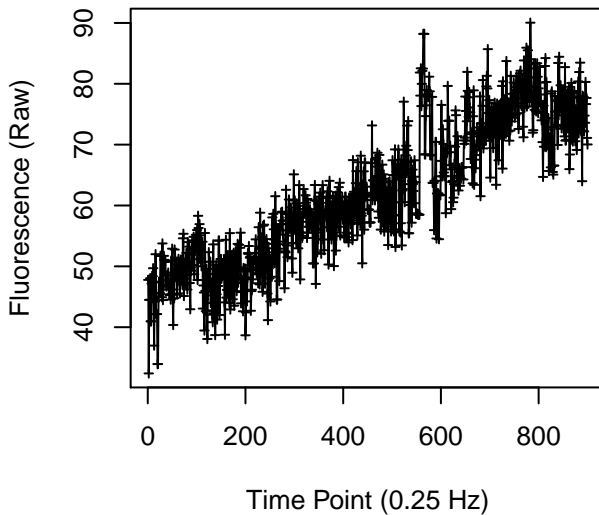

**Cell 2435**

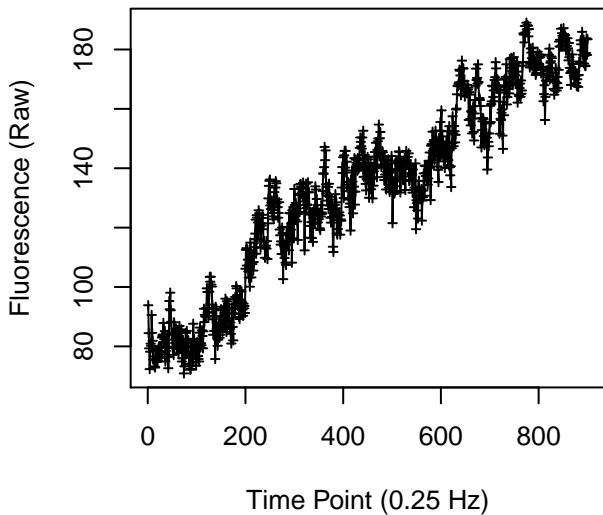

**Cell 2436**

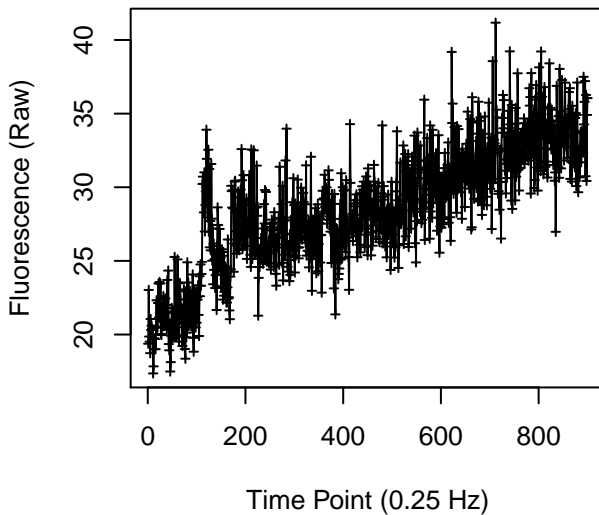

**Cell 2437**

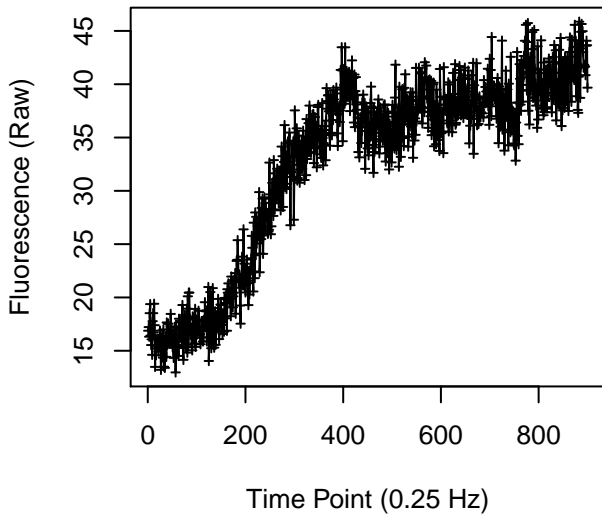

**Cell 2438**

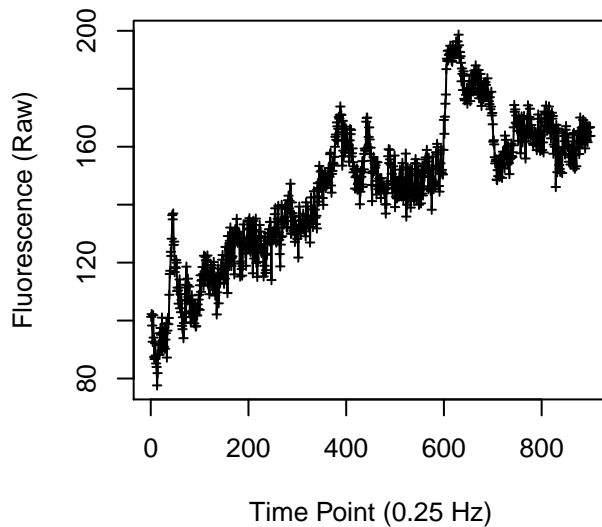

**Cell 2439**

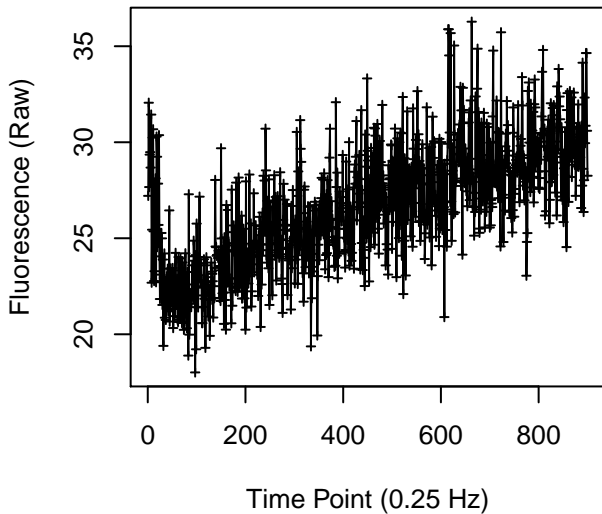

**Cell 2440**

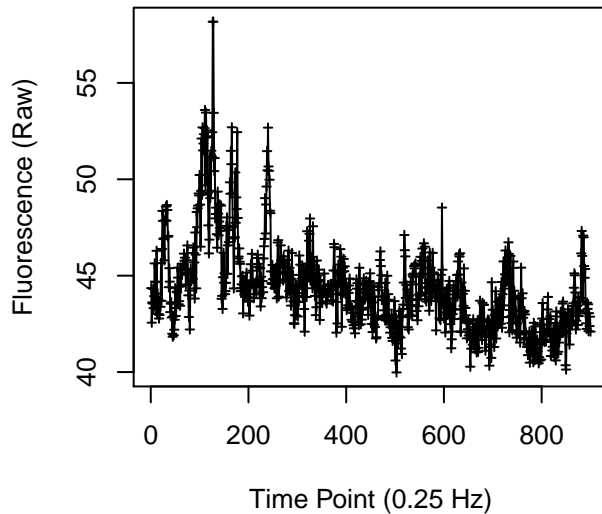



**Cell 2441**

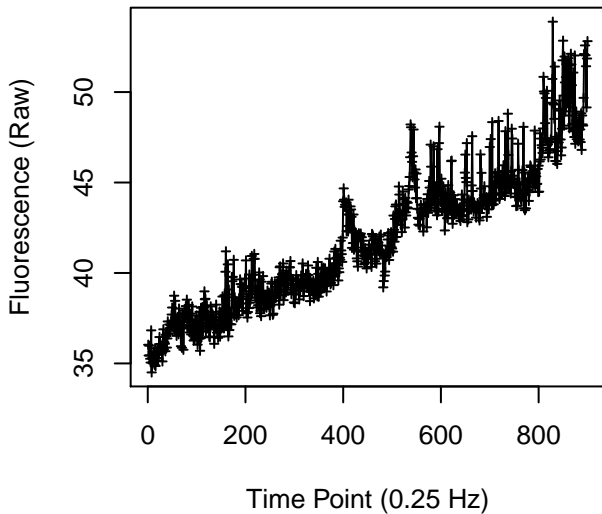

**Cell 2442**

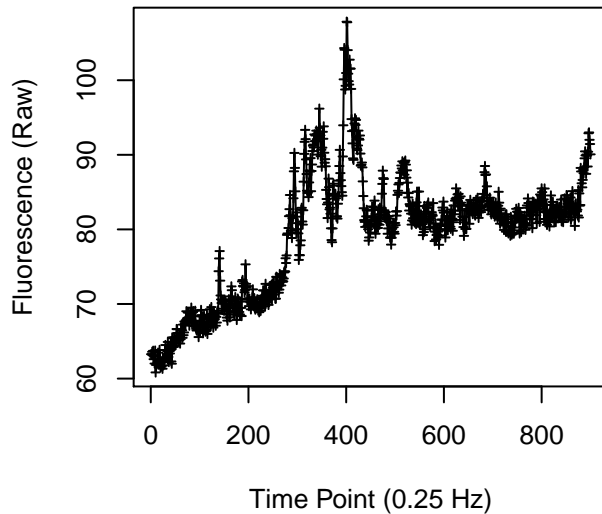

**Cell 2443**

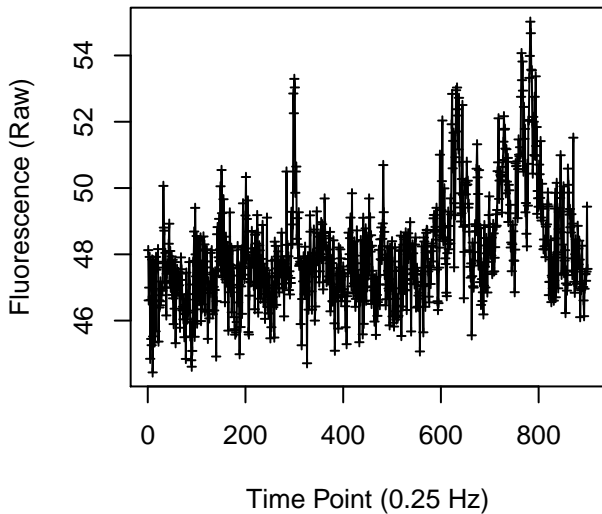

**Cell 2444**

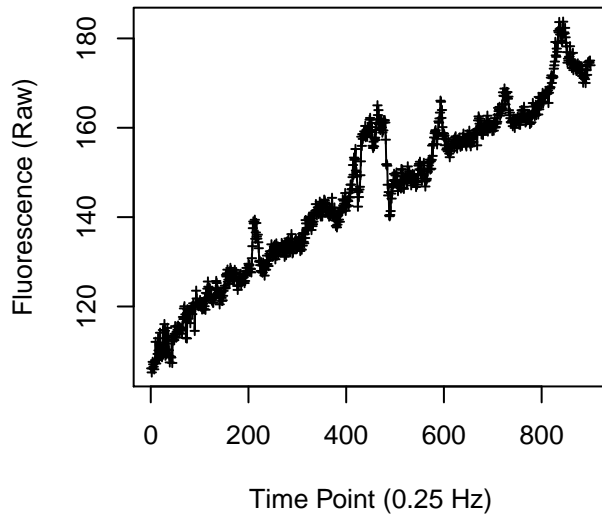

**Cell 2445**

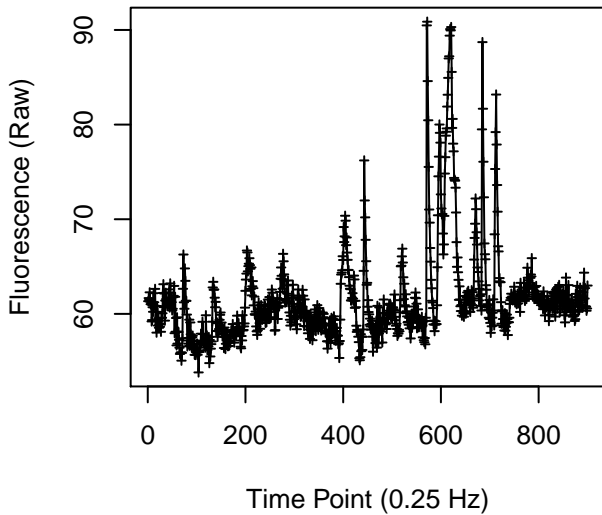

**Cell 2446**

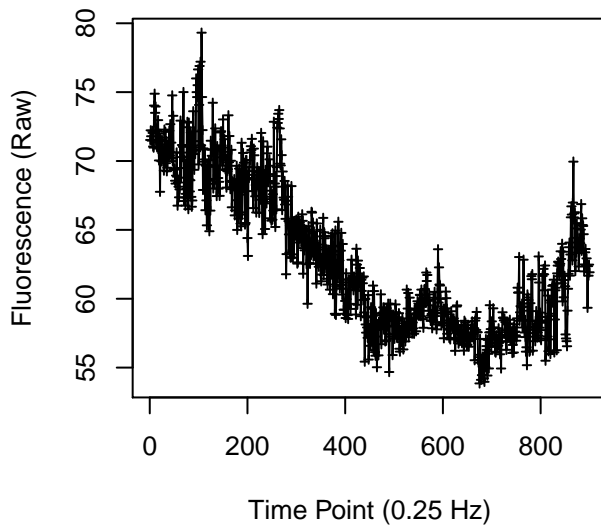

**Cell 2447**

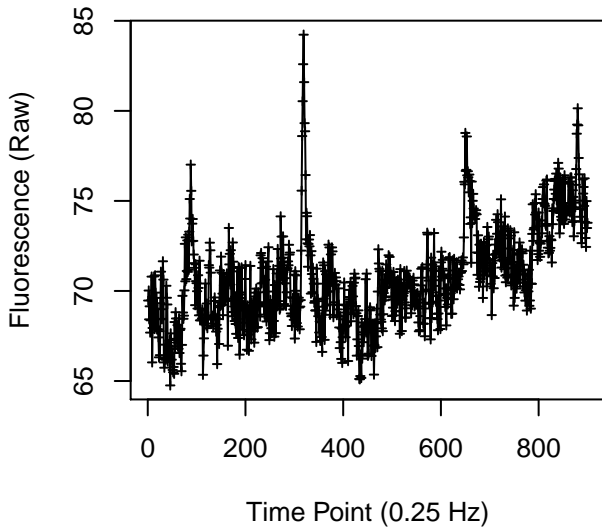

**Cell 2448**

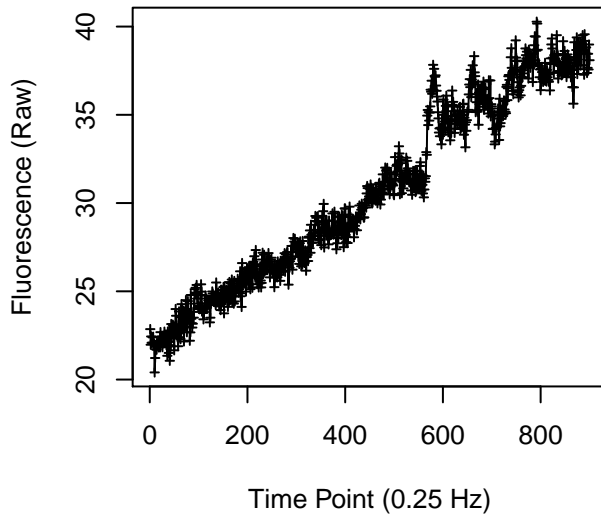

**Cell 2449**

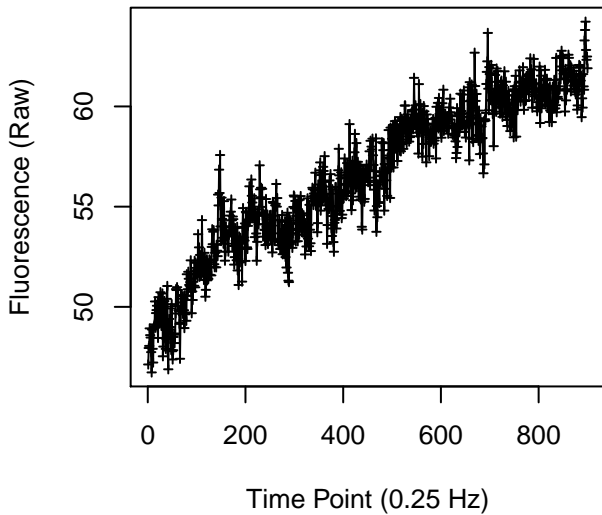

**Cell 2450**

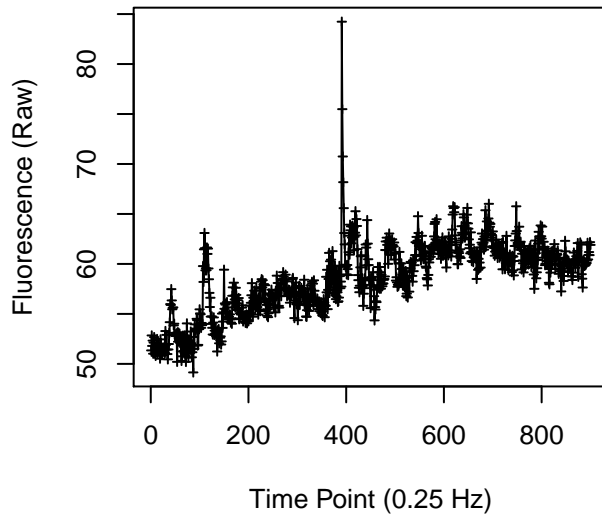

**Cell 2451**

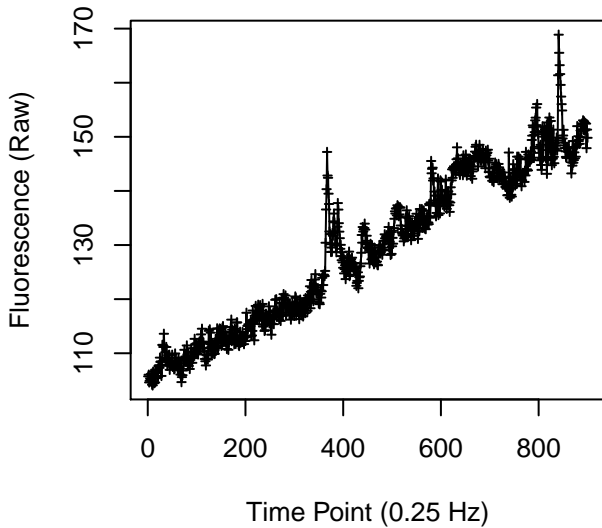

**Cell 2452**

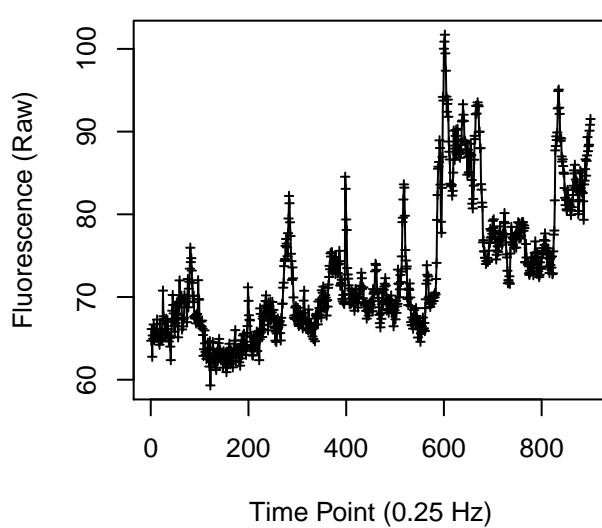

**Cell 2453**

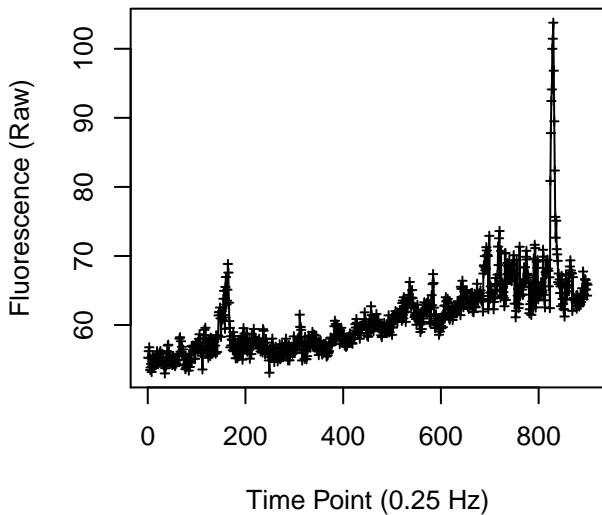

**Cell 2454**

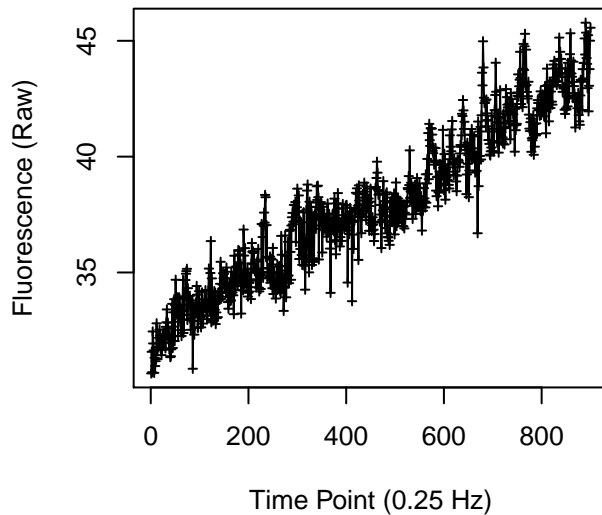

**Cell 2455**

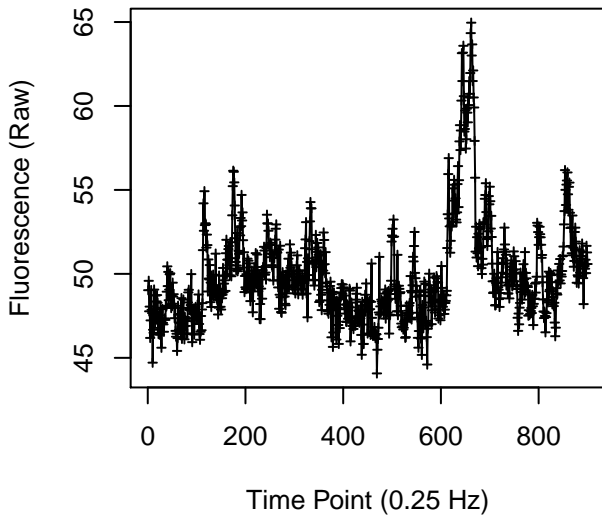

**Cell 2456**

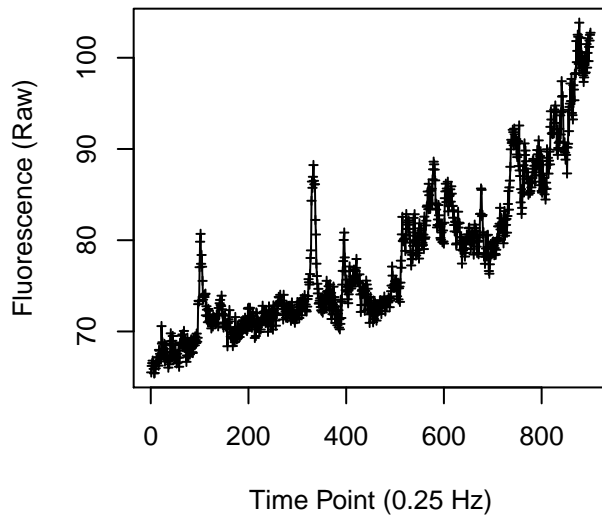

**Cell 2457**

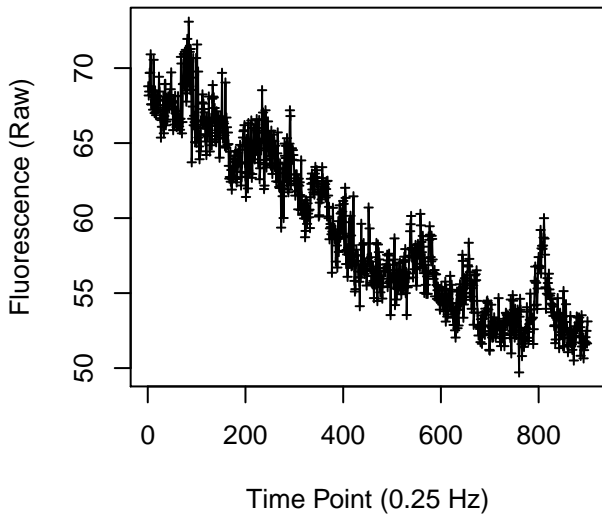

**Cell 2458**

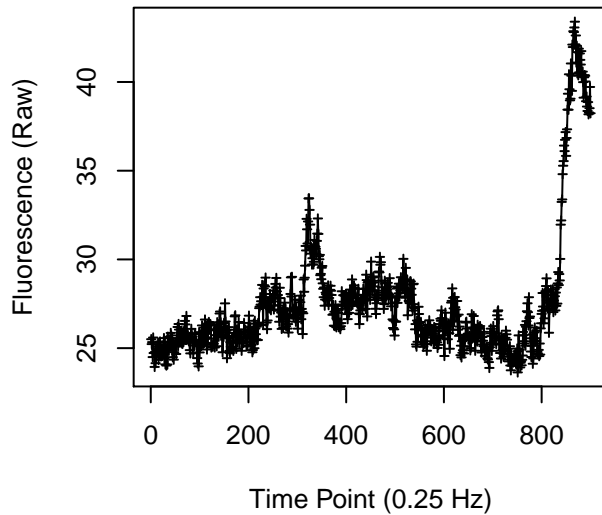

**Cell 2459**

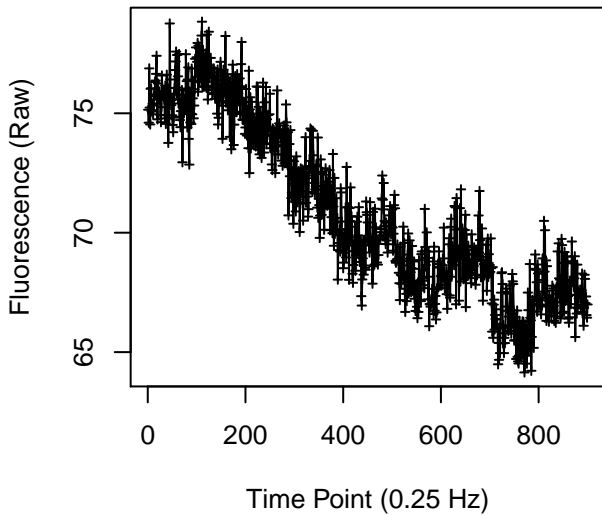

**Cell 2460**

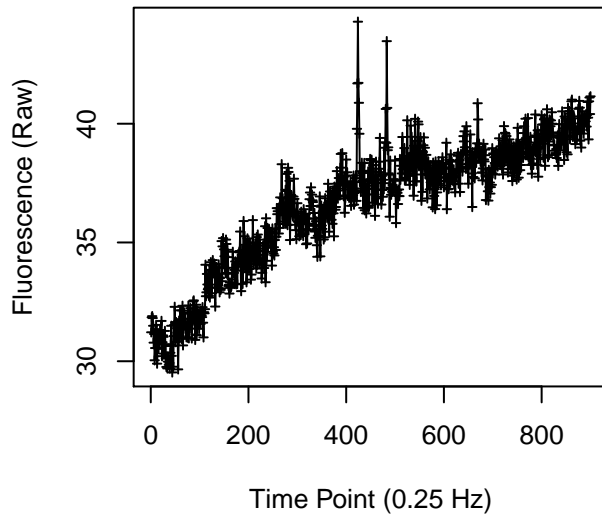

**Cell 2461**

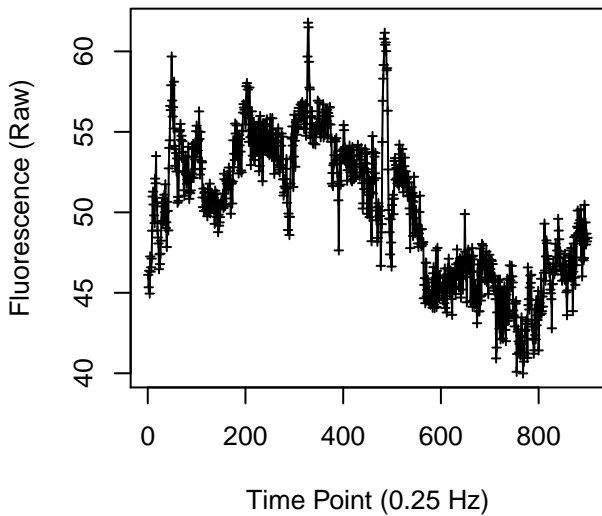

**Cell 2462**

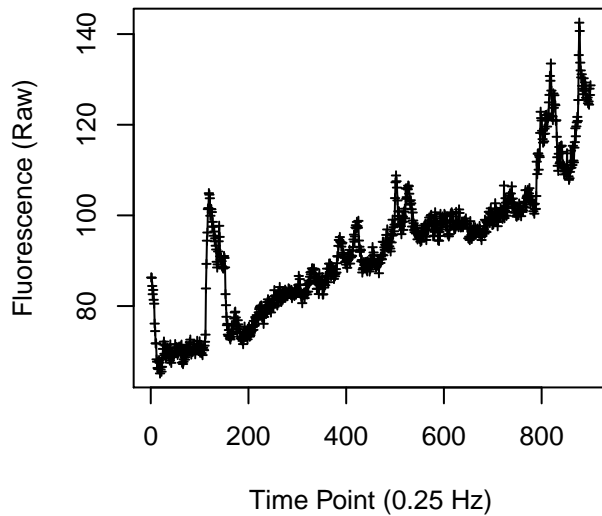

**Cell 2463**

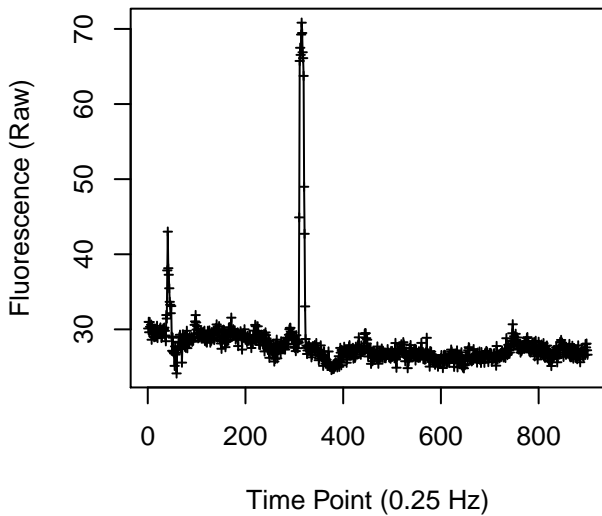

**Cell 2464**

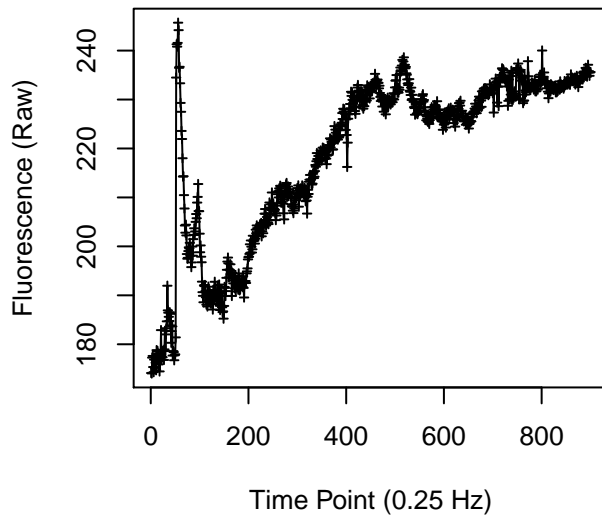

**Cell 2465**

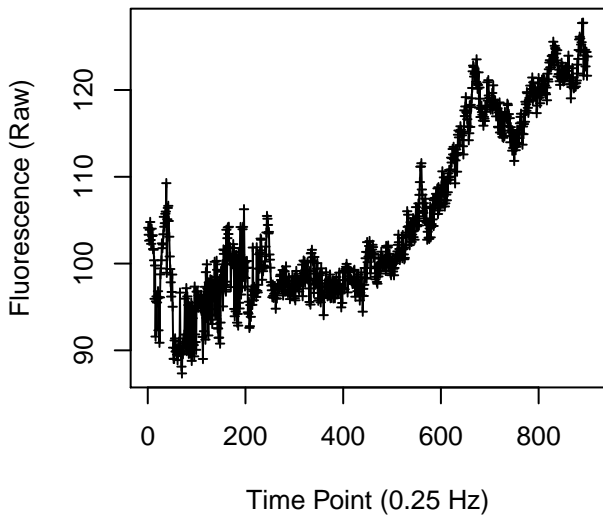

**Cell 2466**

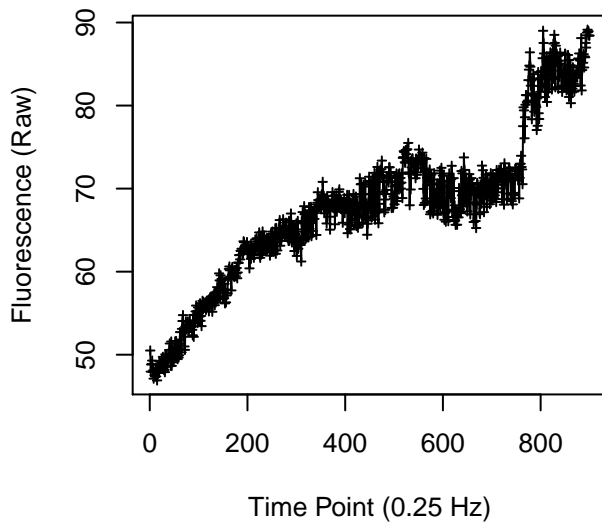

**Cell 2467**

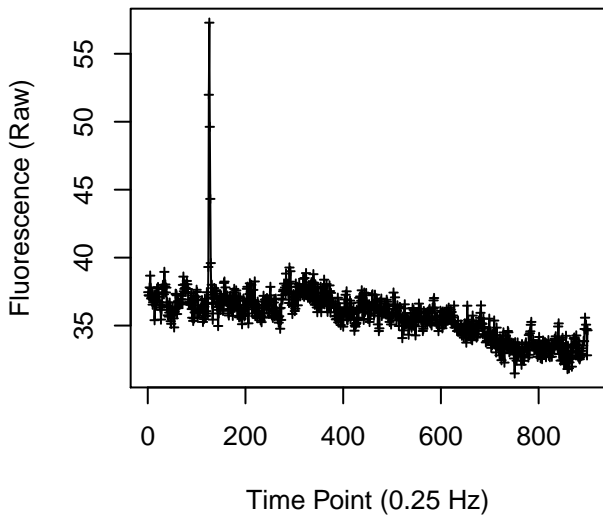

**Cell 2468**

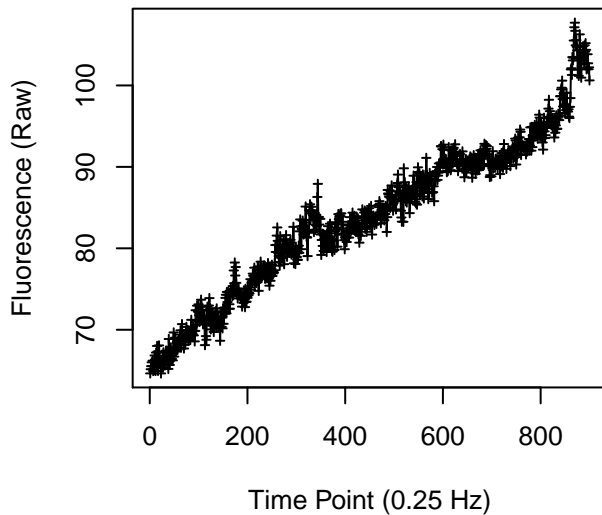

**Cell 2469**

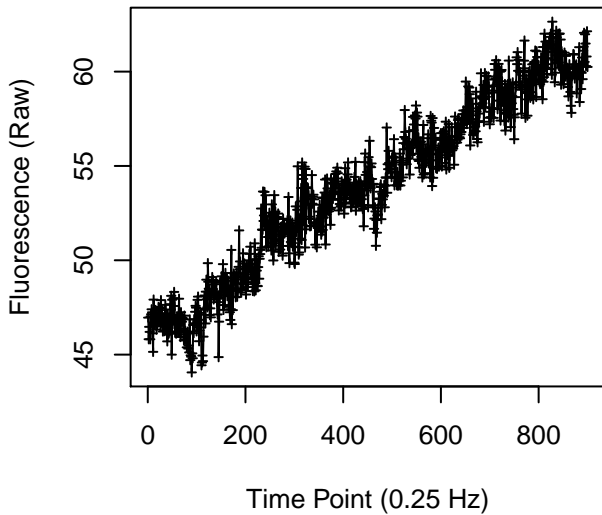

**Cell 2470**

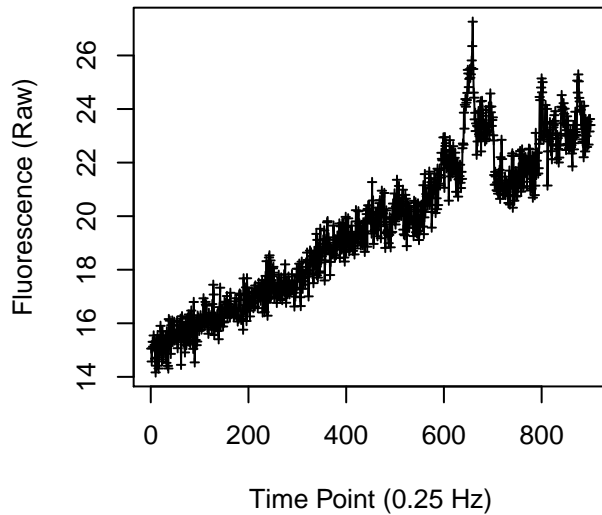

**Cell 2471**

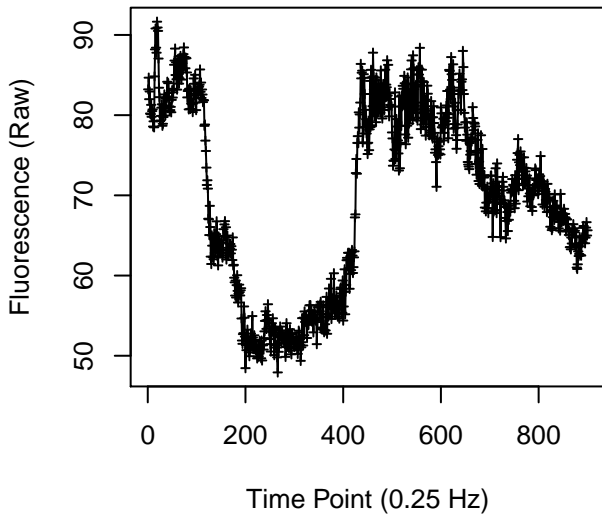

**Cell 2472**

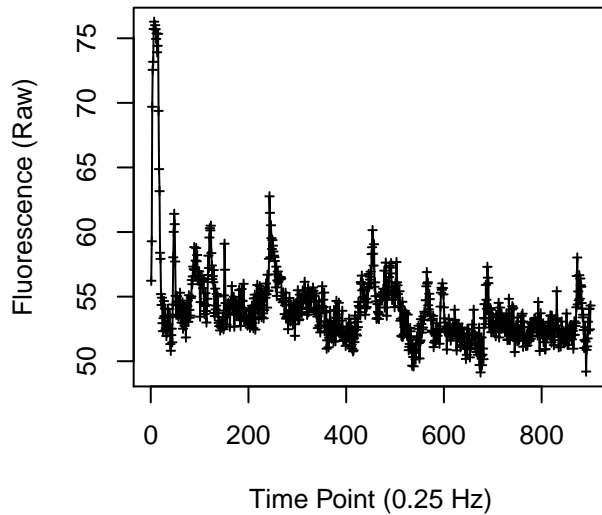



**Cell 2473**

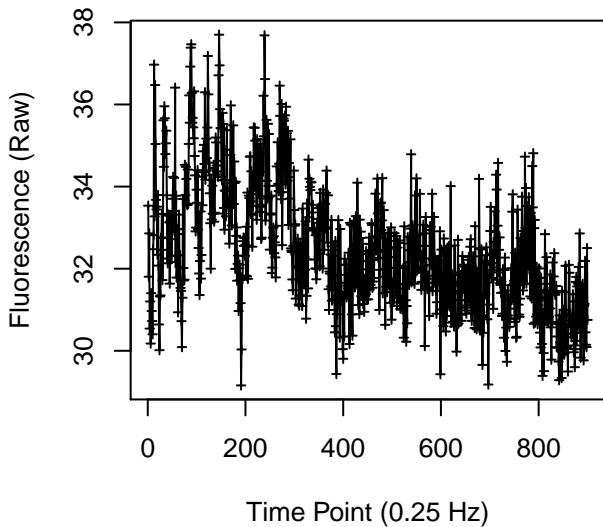

**Cell 2474**

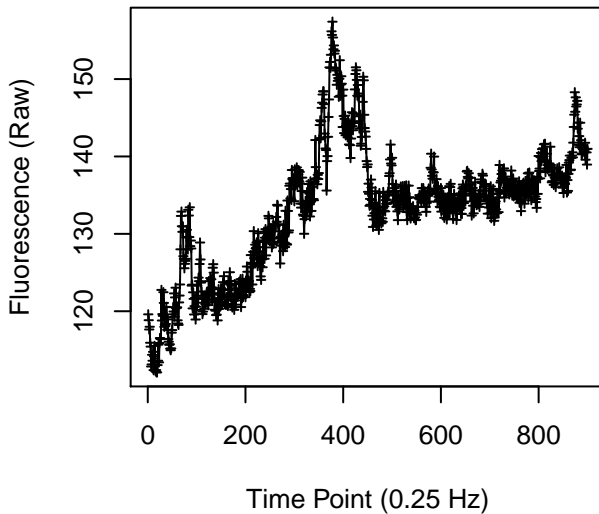

**Cell 2475**

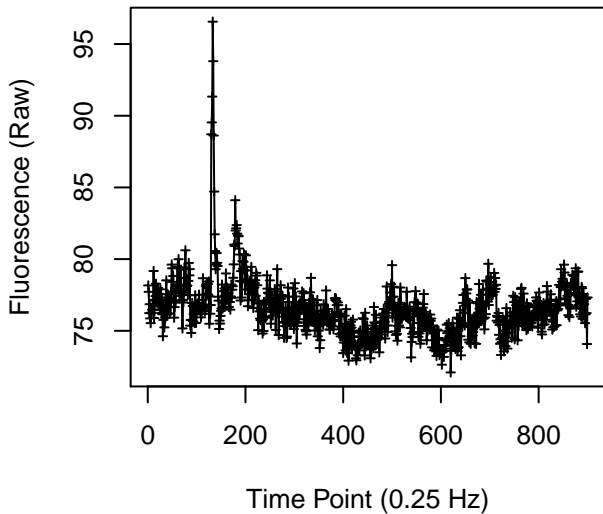

**Cell 2476**

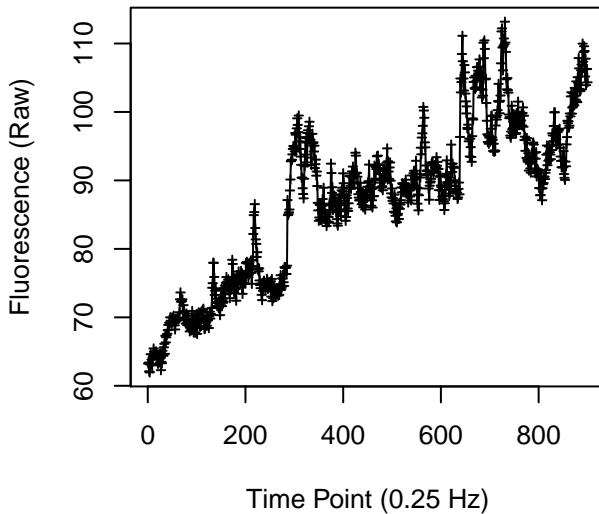

**Cell 2477**

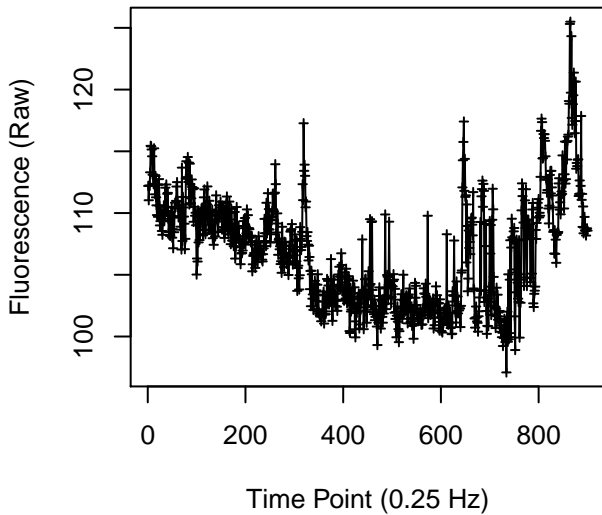

**Cell 2478**

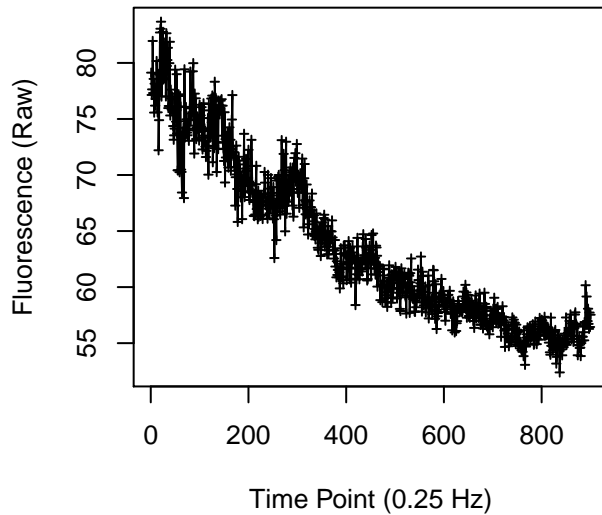

**Cell 2479**

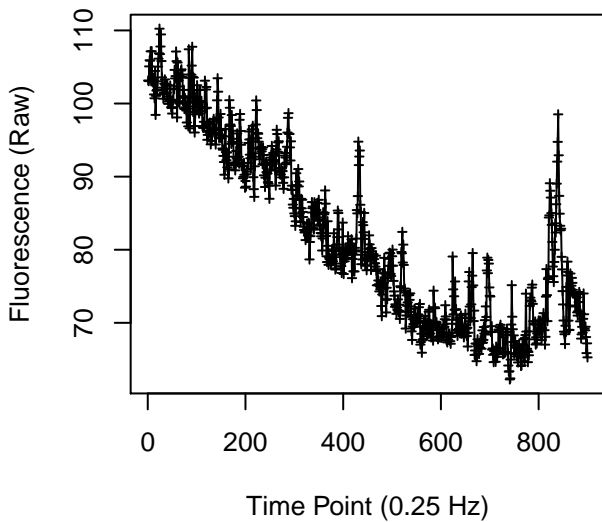

**Cell 2480**

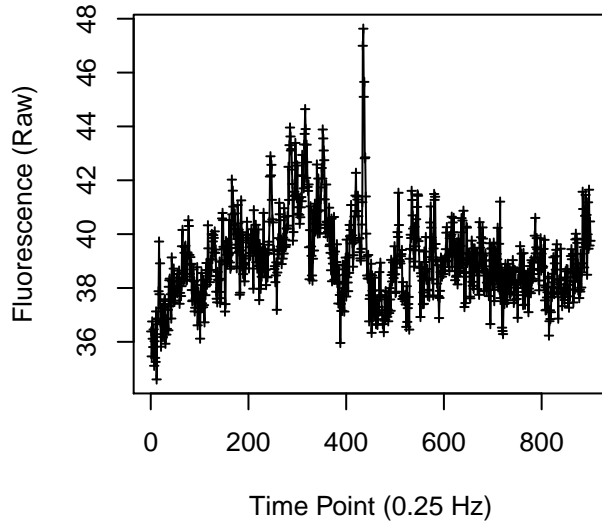

**Cell 2481**

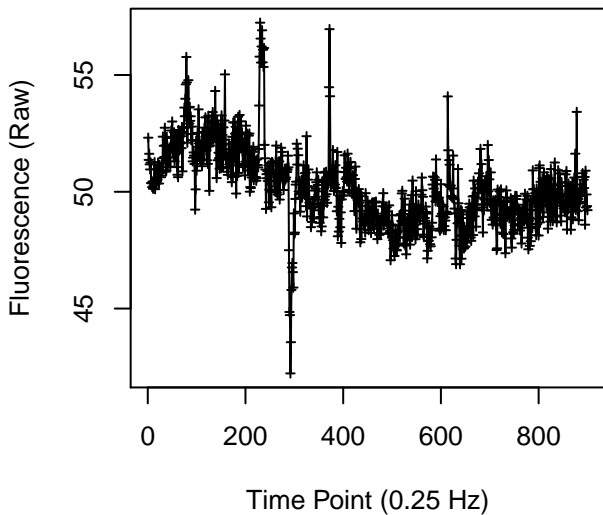

**Cell 2482**

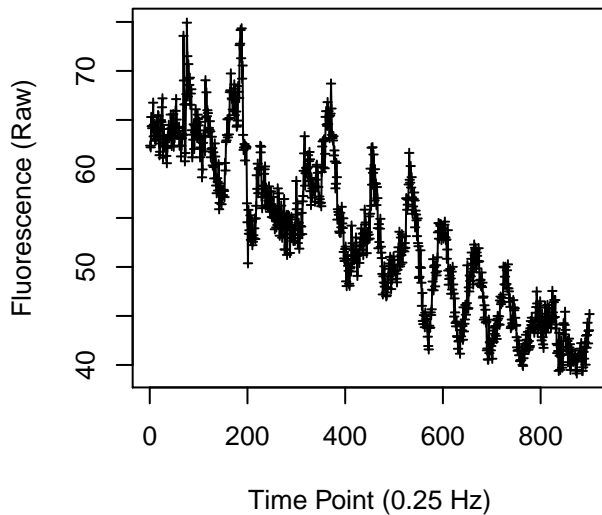

**Cell 2483**

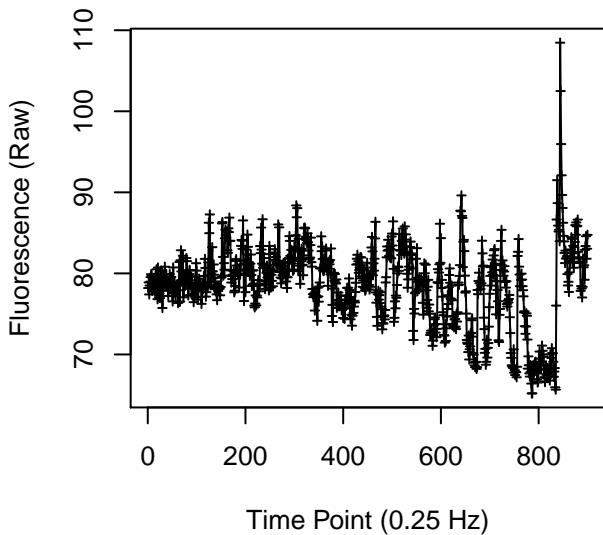

**Cell 2484**

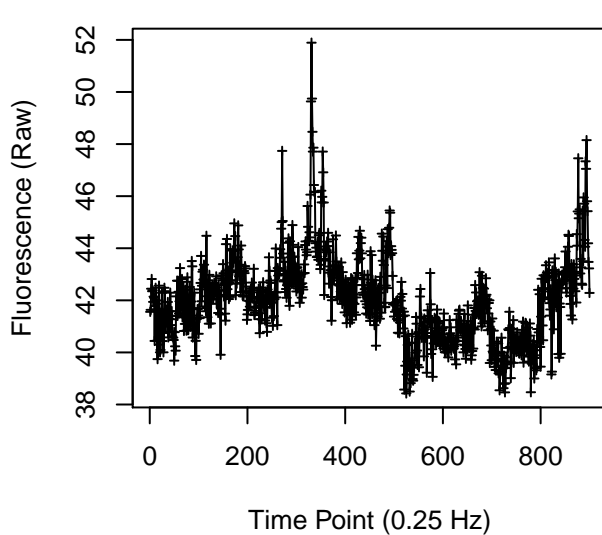

**Cell 2485**

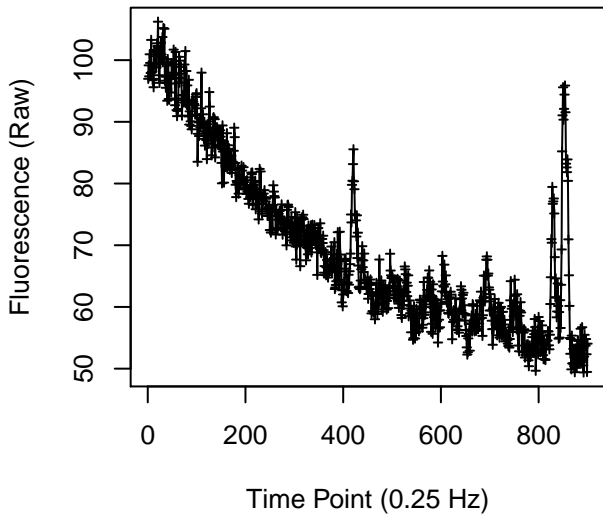

**Cell 2486**

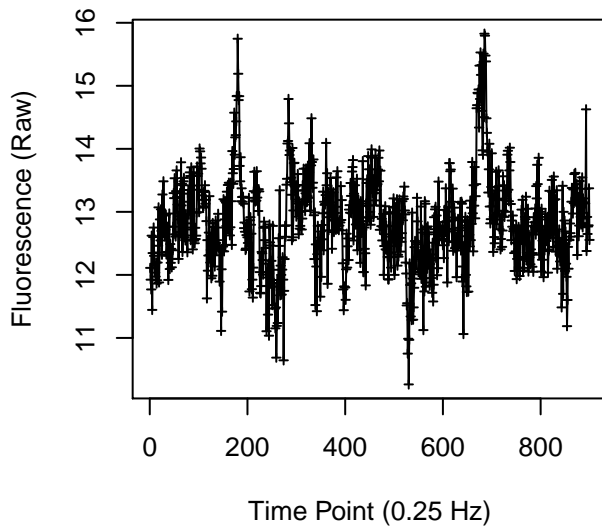

**Cell 2487**

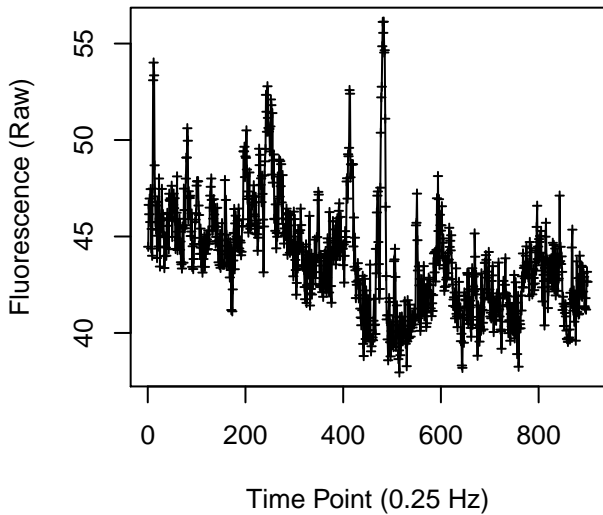

**Cell 2488**

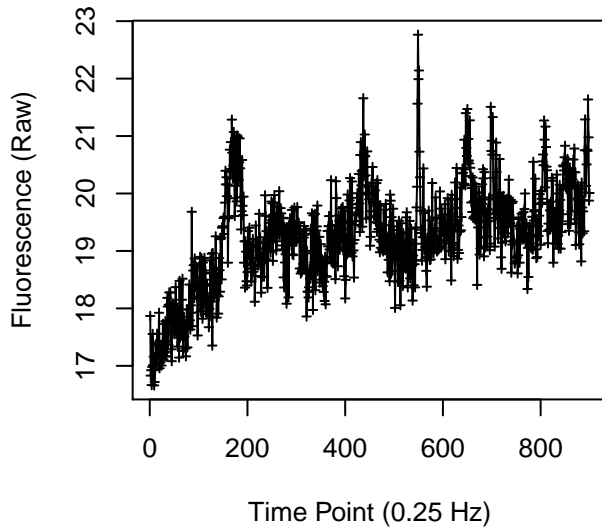

**Cell 2489**

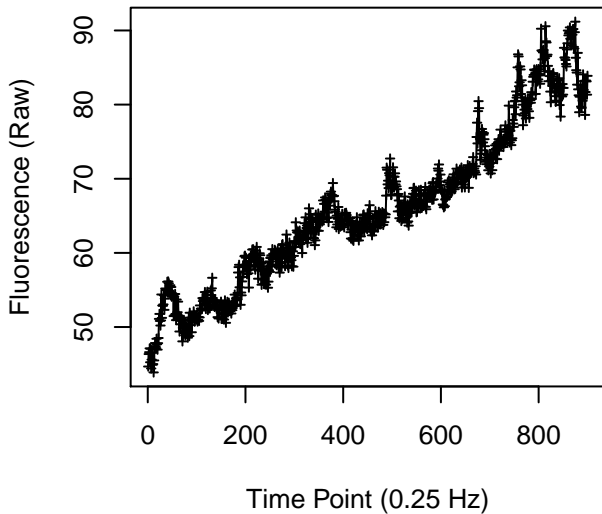

**Cell 2490**

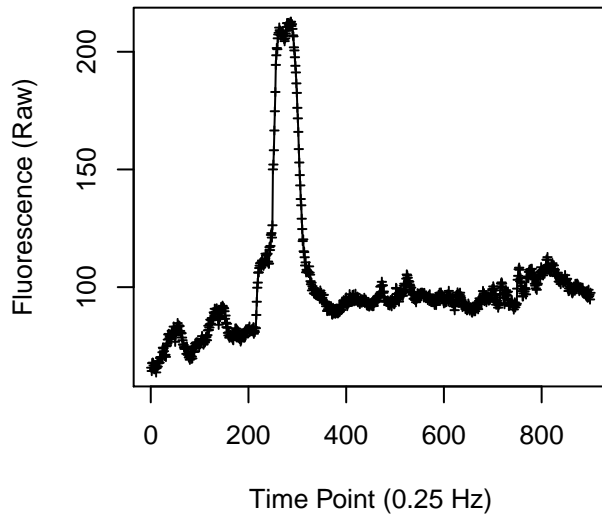

**Cell 2491**

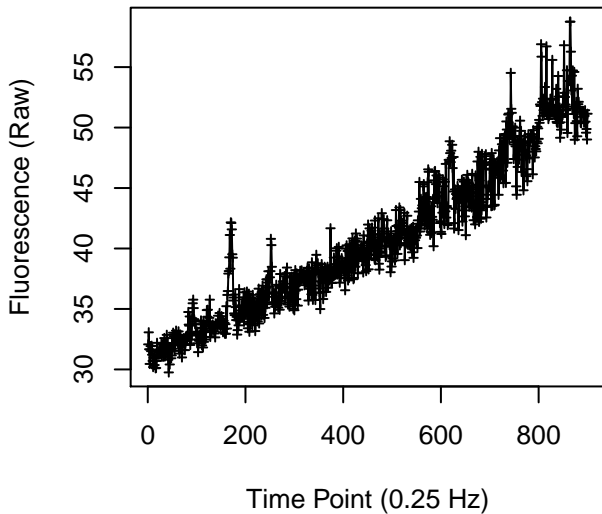

**Cell 2492**

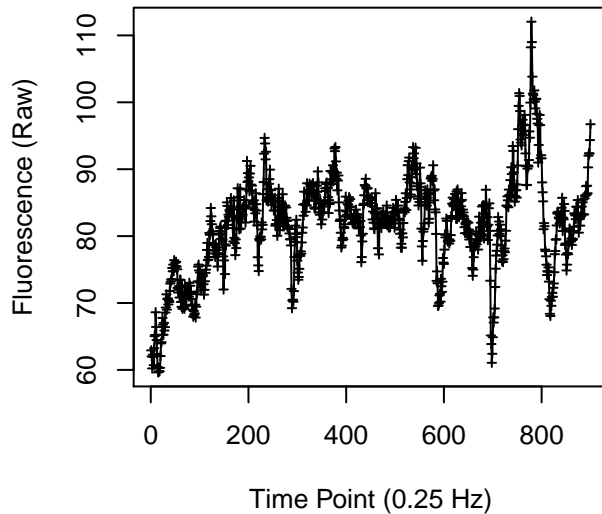

**Cell 2493**

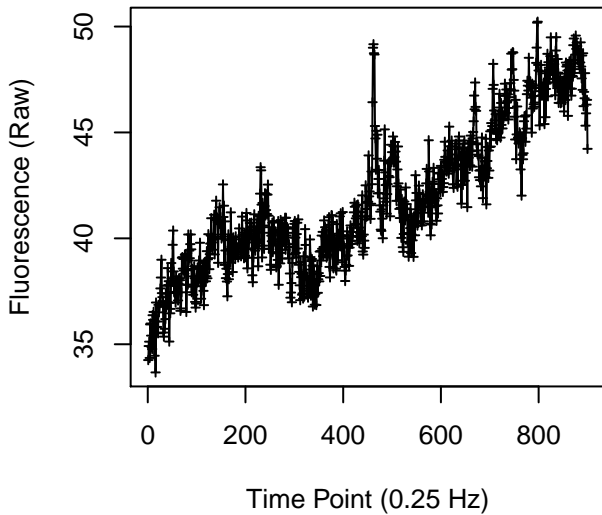

**Cell 2494**

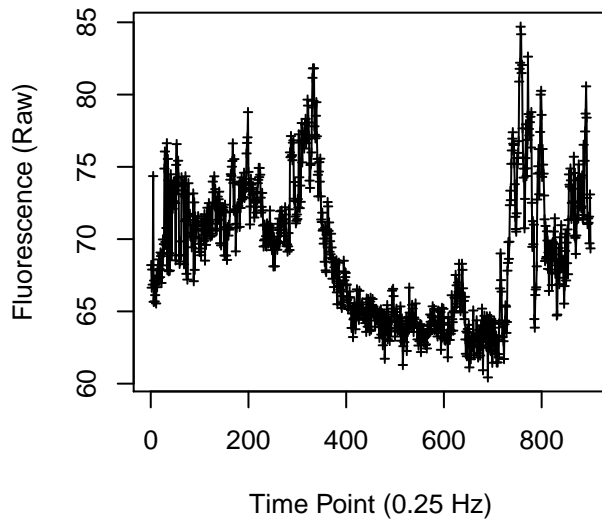

**Cell 2495**

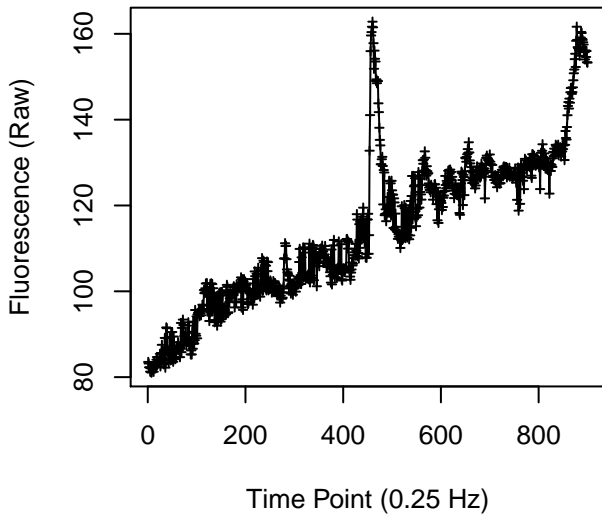

**Cell 2496**

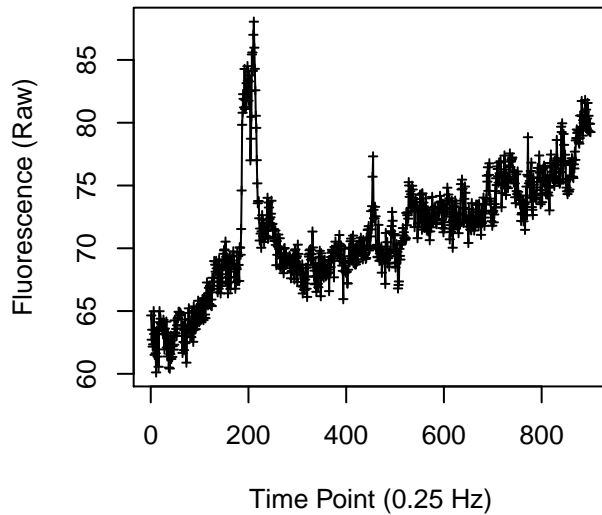

**Cell 2497**

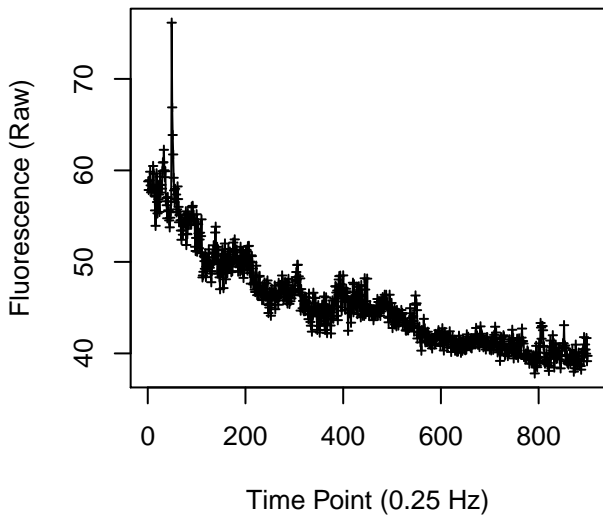

**Cell 2498**

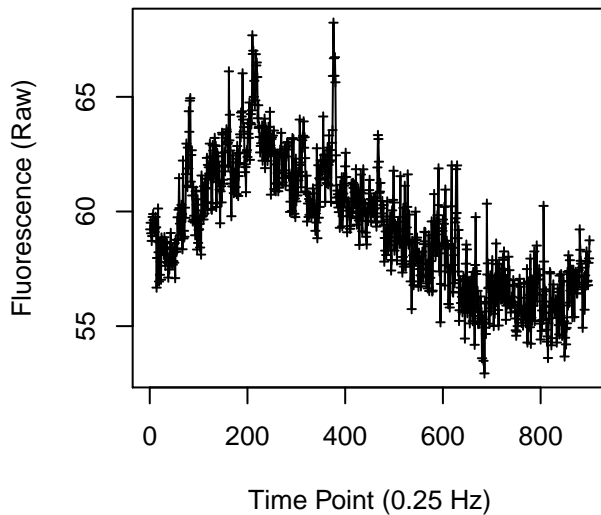

**Cell 2499**

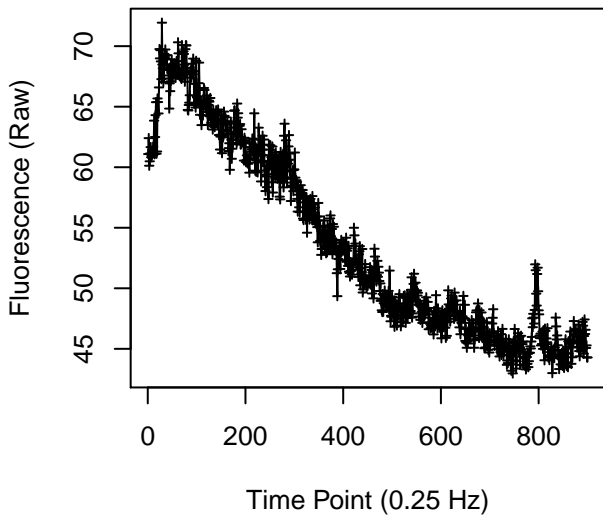

**Cell 2500**

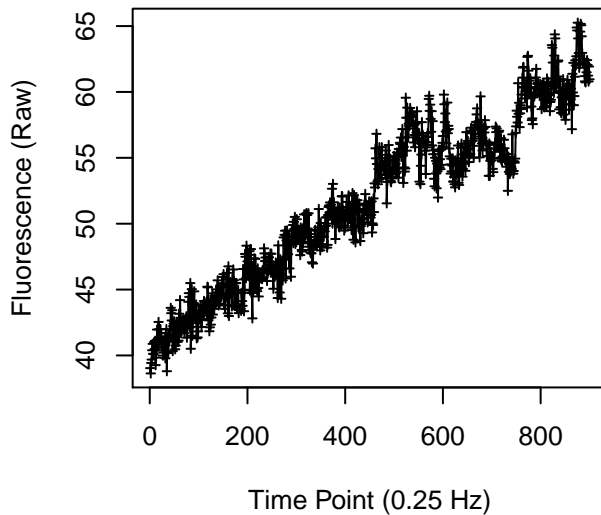

**Cell 2501**

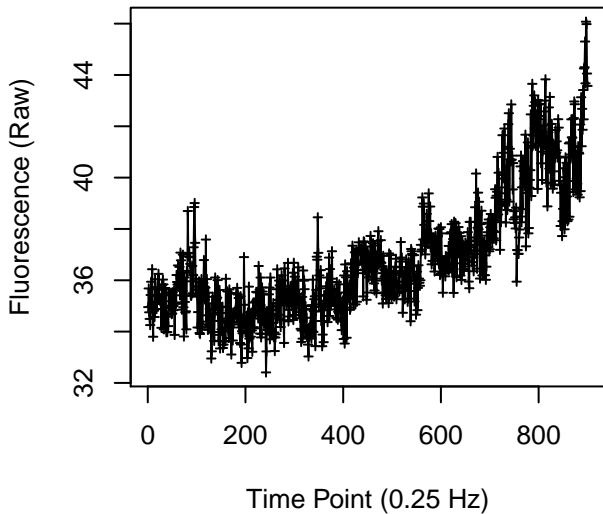

**Cell 2502**

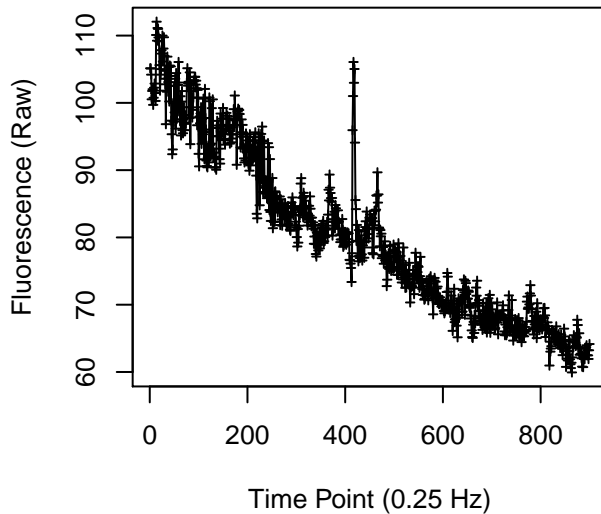

**Cell 2503**

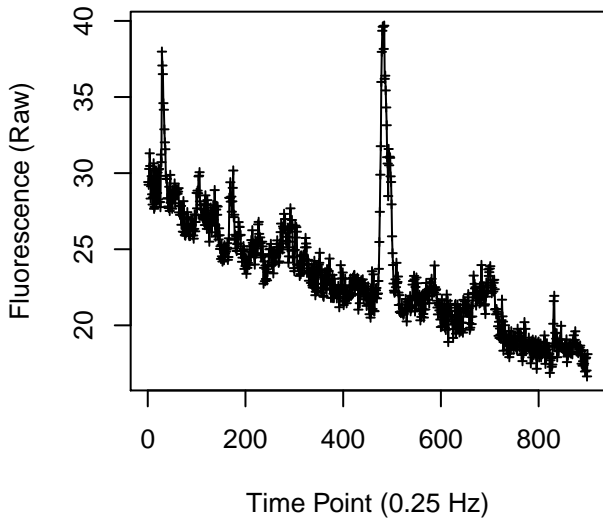

**Cell 2504**

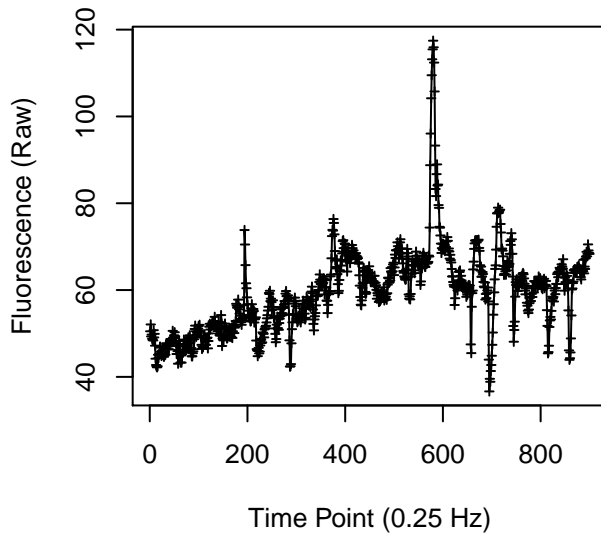



**Cell 2505**

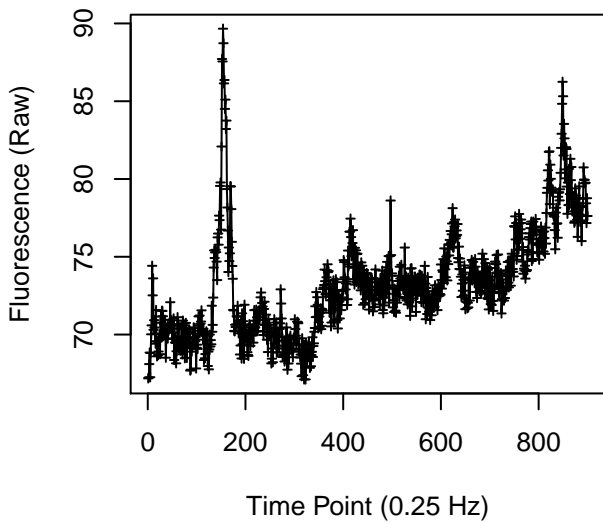

**Cell 2506**

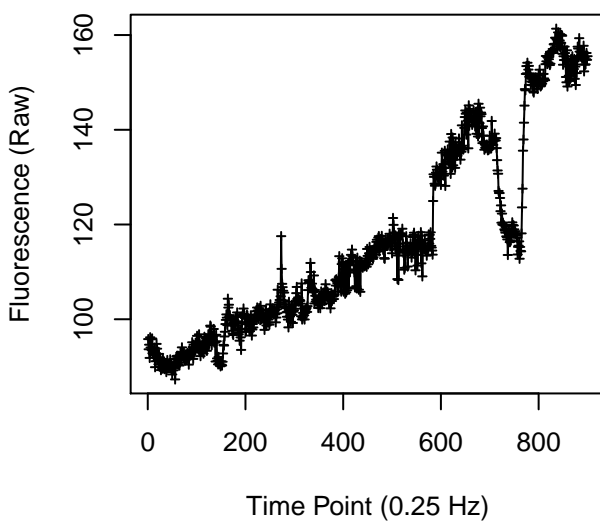

**Cell 2507**

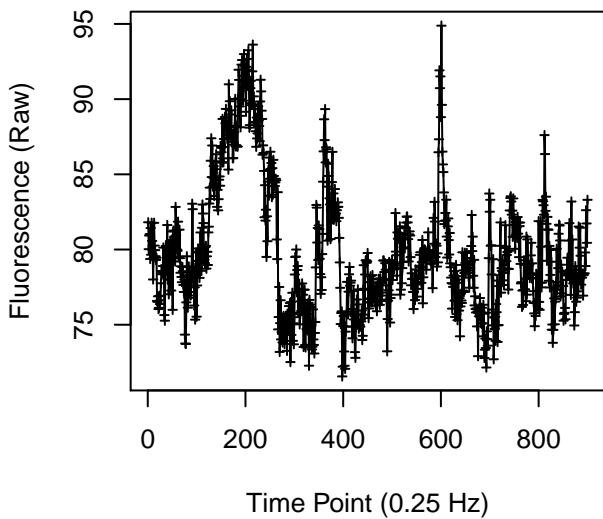

**Cell 2508**

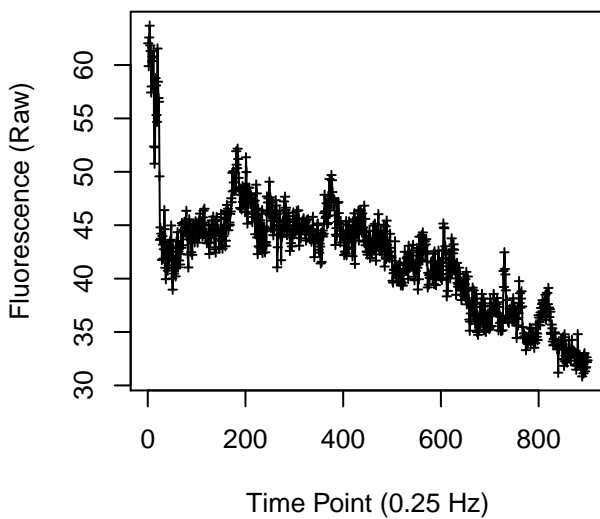

**Cell 2509**

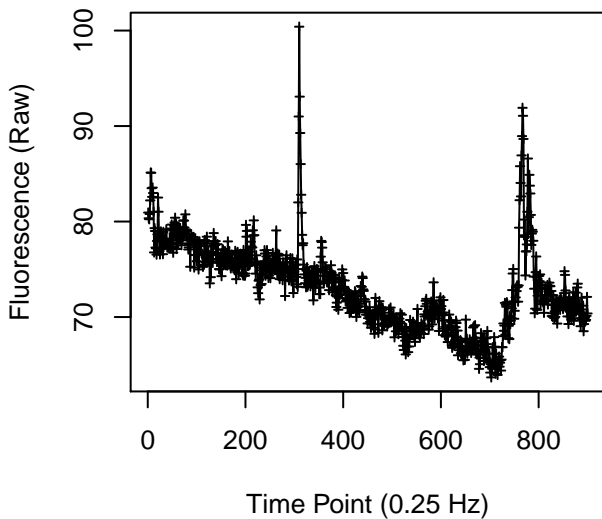

**Cell 2510**

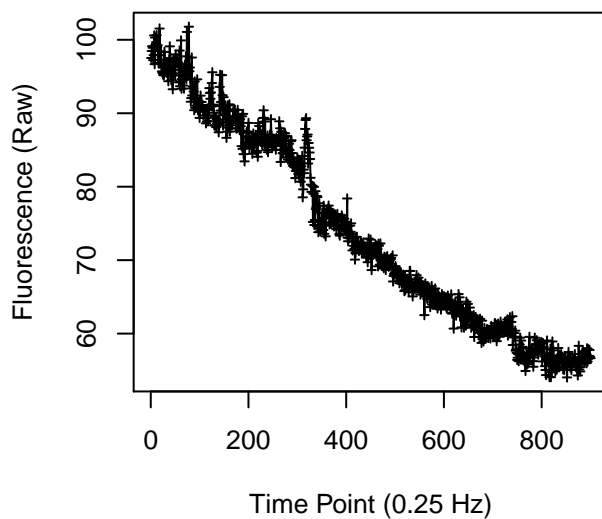

**Cell 2511**

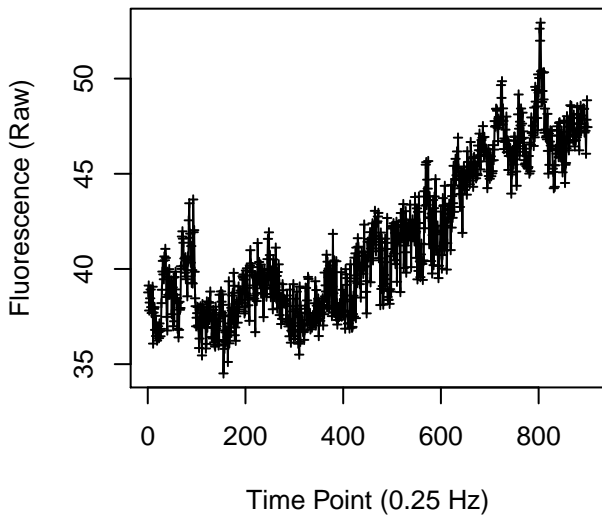

**Cell 2512**

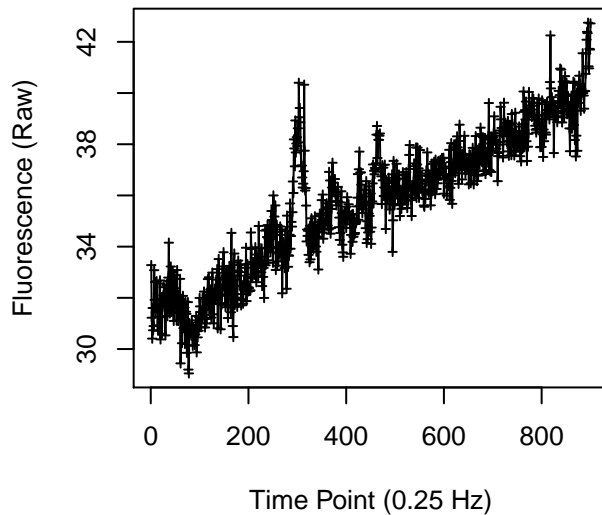

**Cell 2513**

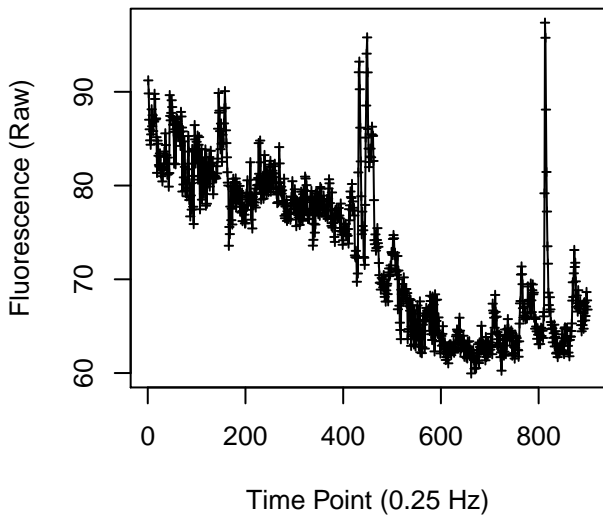

**Cell 2514**

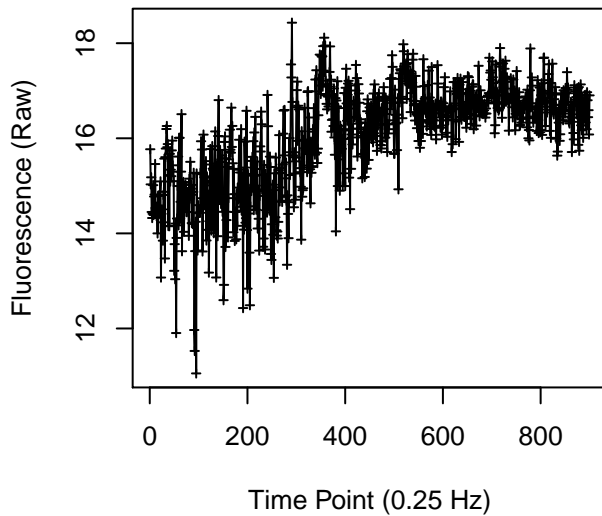

**Cell 2515**

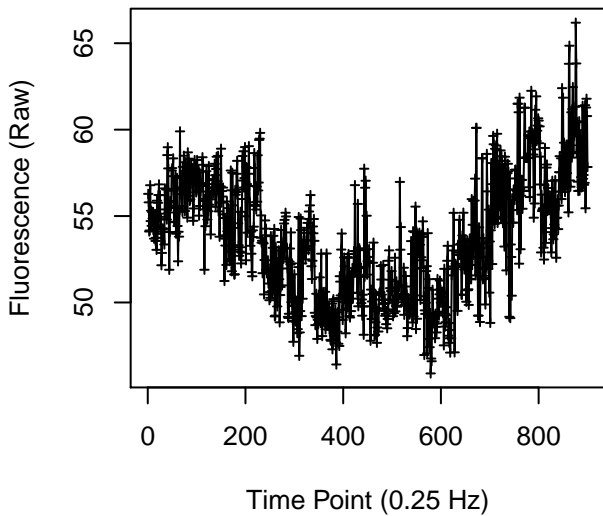

**Cell 2516**

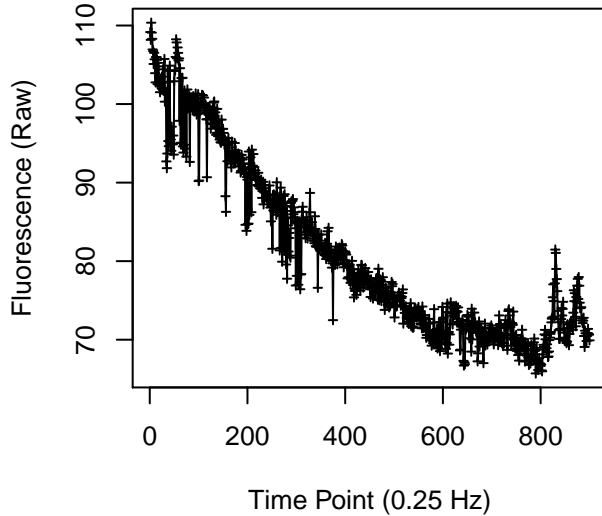

**Cell 2517**

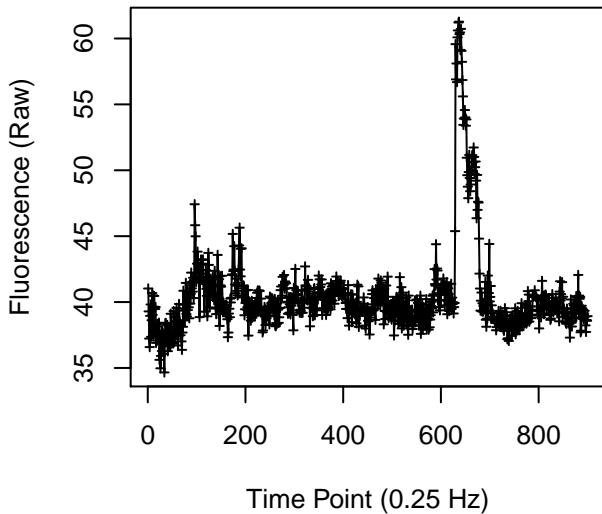

**Cell 2518**

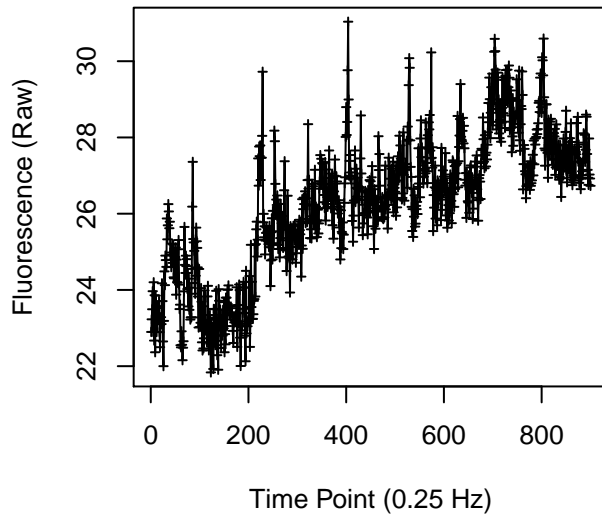

**Cell 2519**

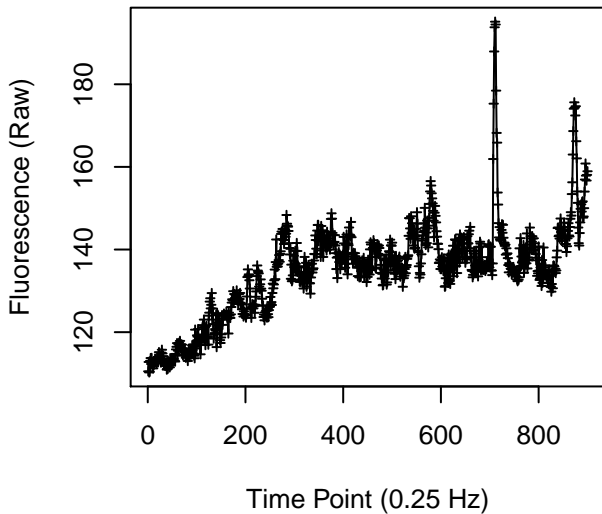

**Cell 2520**

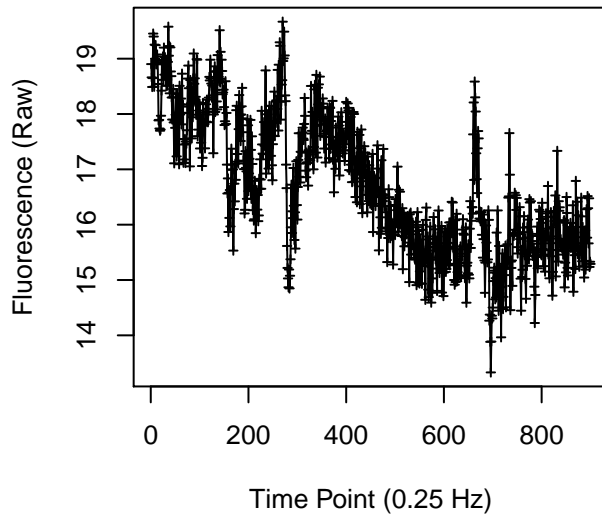

**Cell 2521**

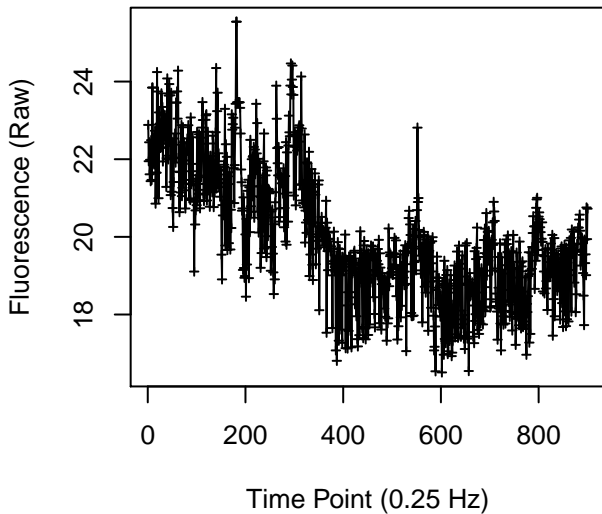

**Cell 2522**

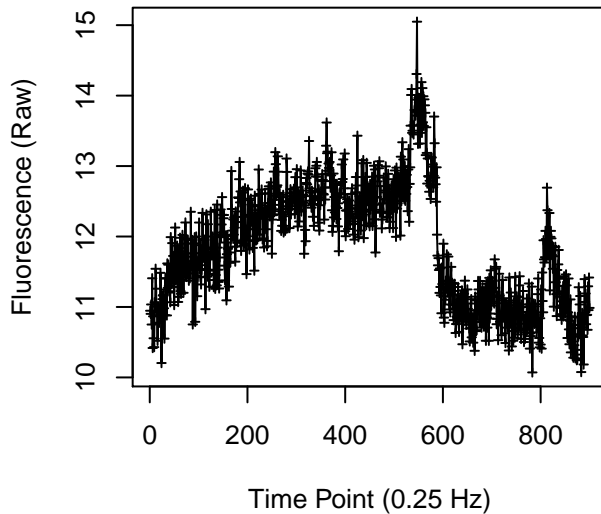

**Cell 2523**

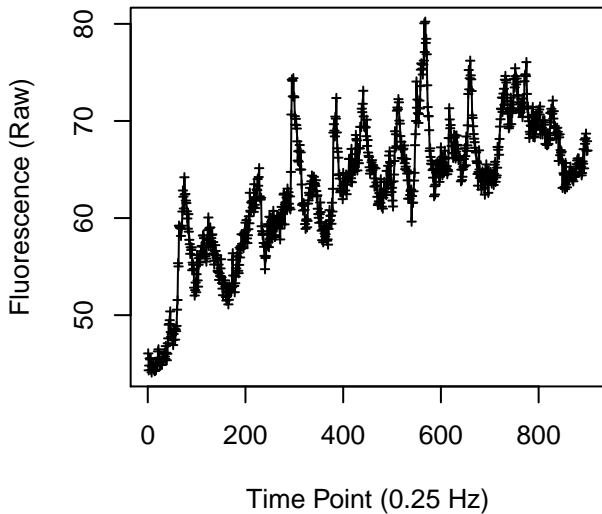

**Cell 2524**

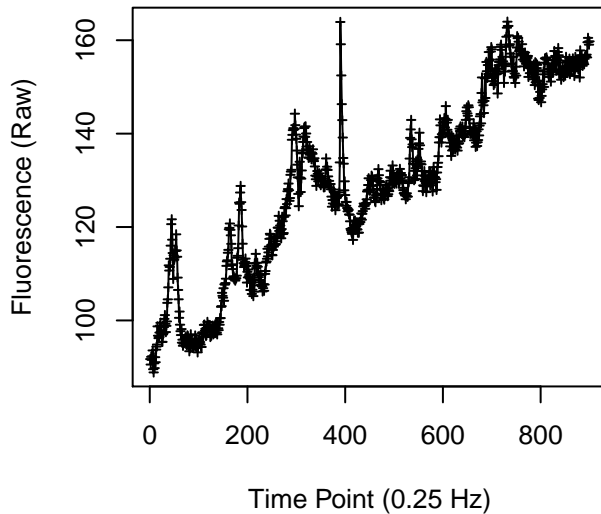

**Cell 2525**

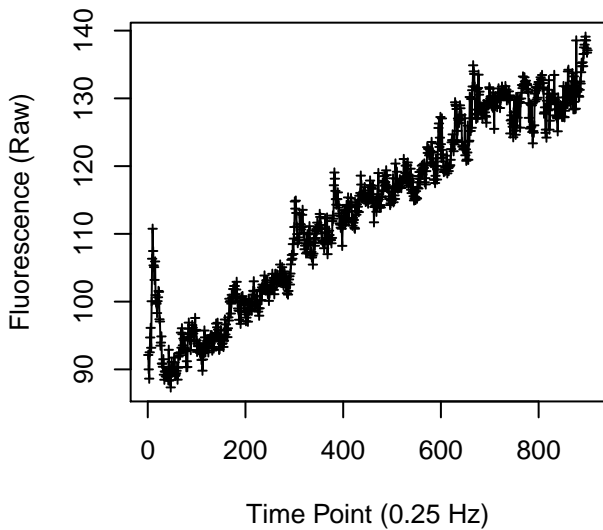

**Cell 2526**

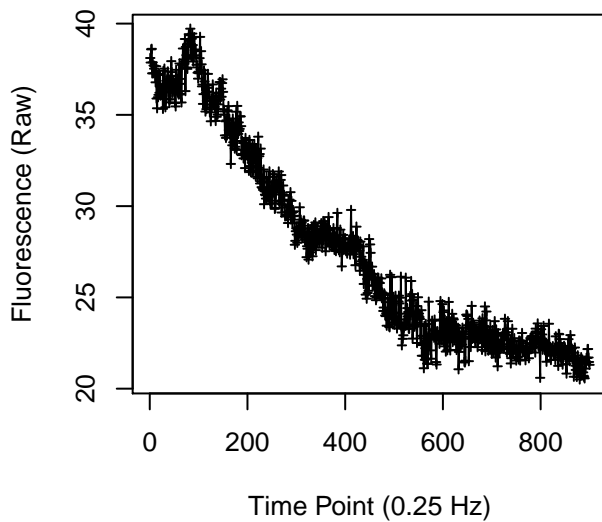

**Cell 2527**

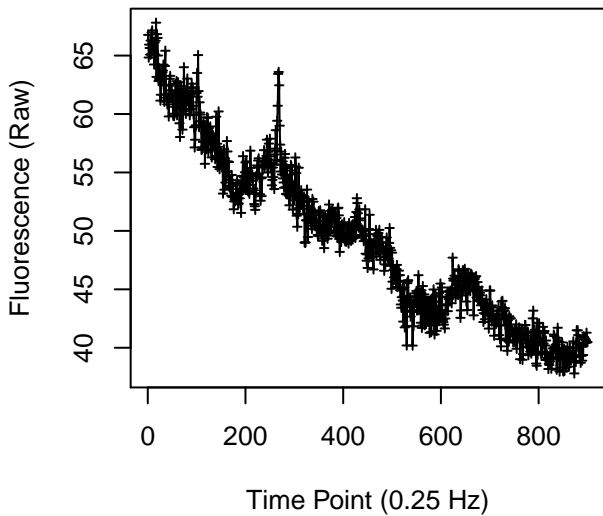

**Cell 2528**

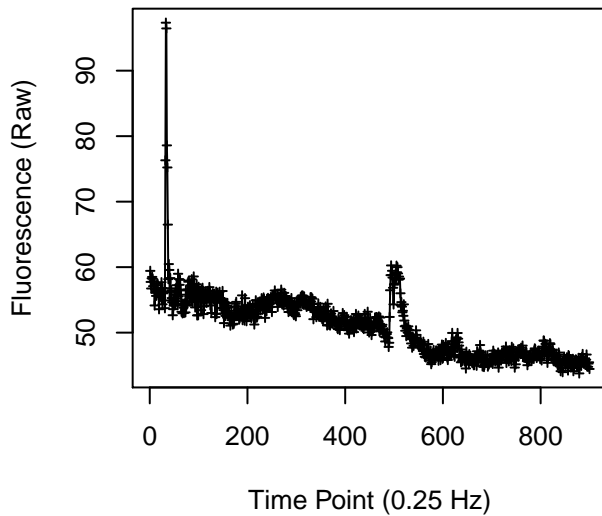

**Cell 2529**

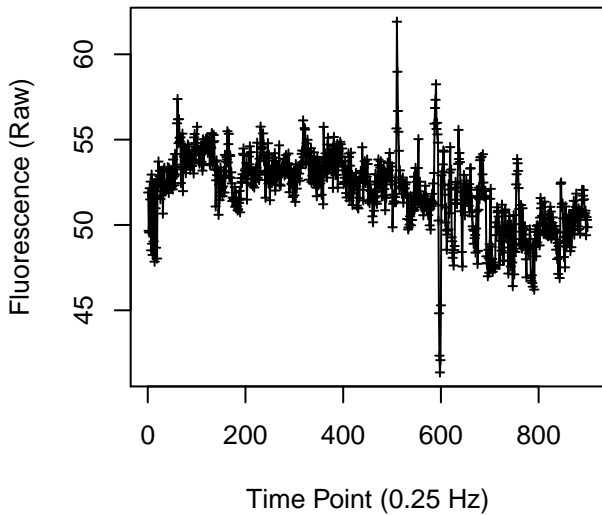

**Cell 2530**

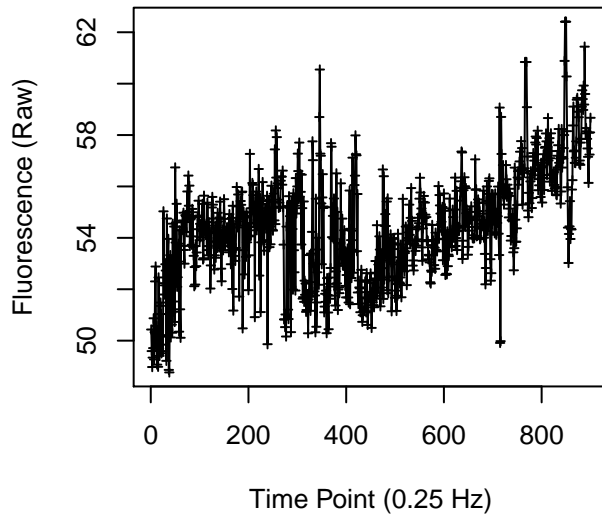

**Cell 2531**

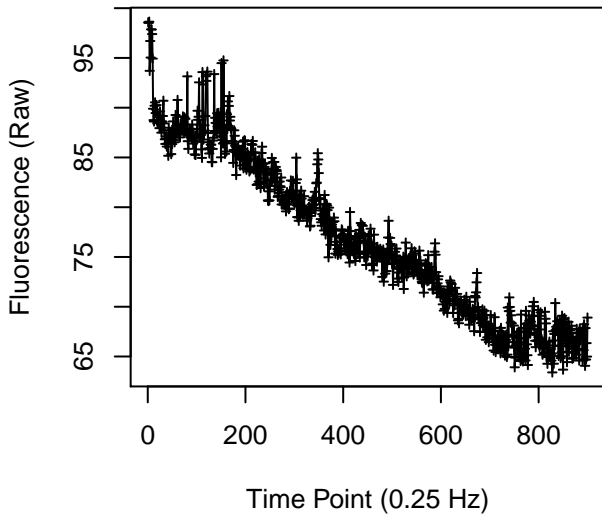

**Cell 2532**

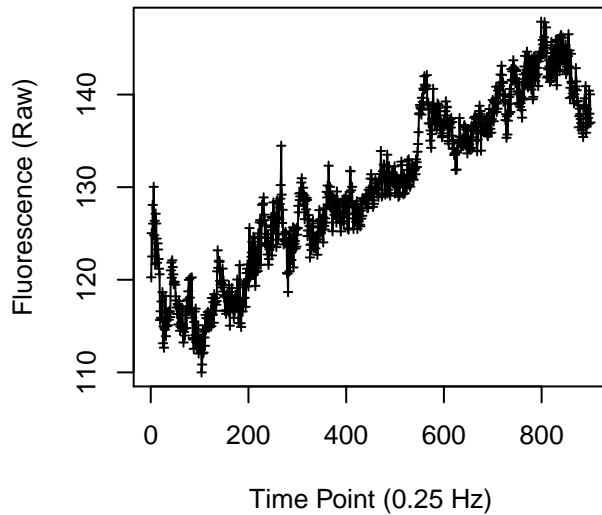

**Cell 2533**

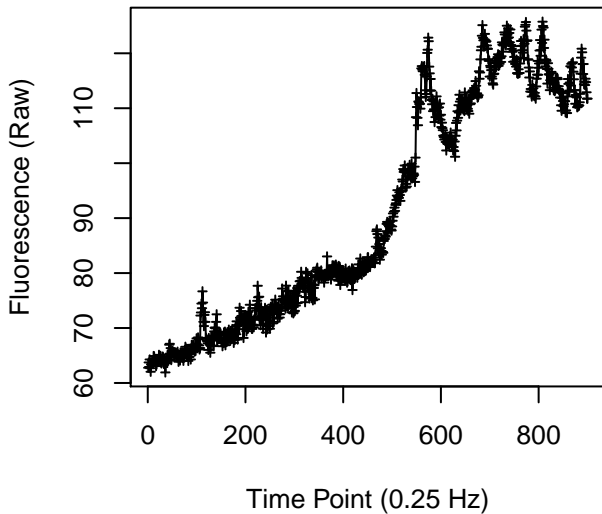

**Cell 2534**

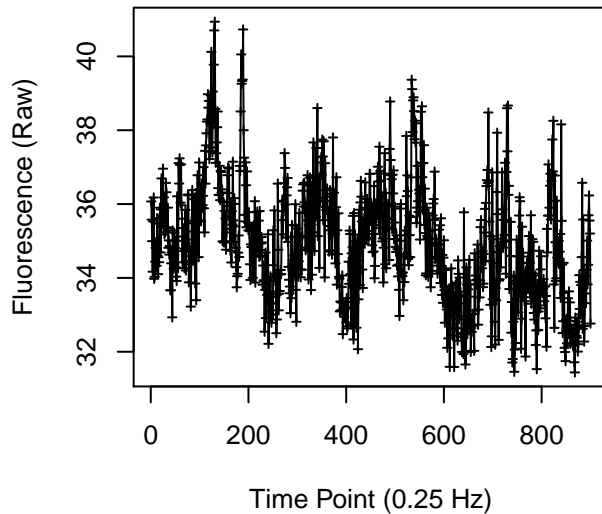

**Cell 2535**

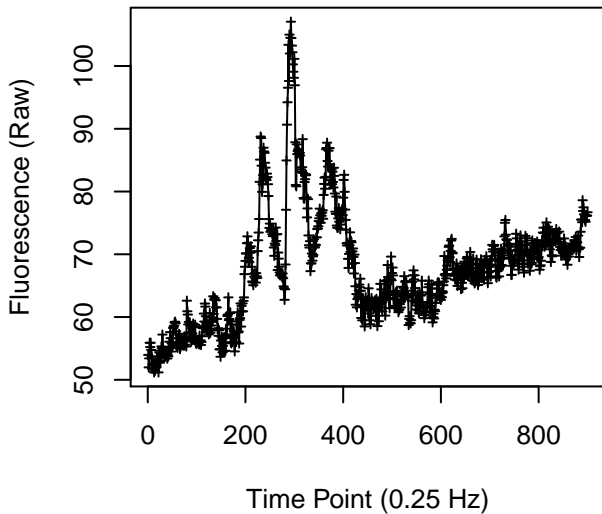

**Cell 2536**

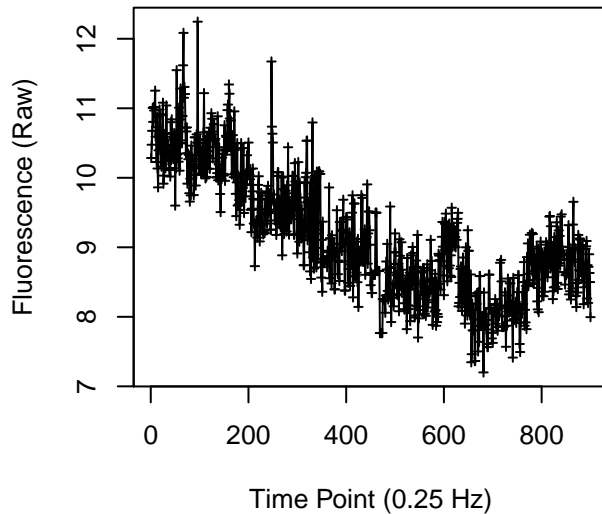



**Cell 2537**

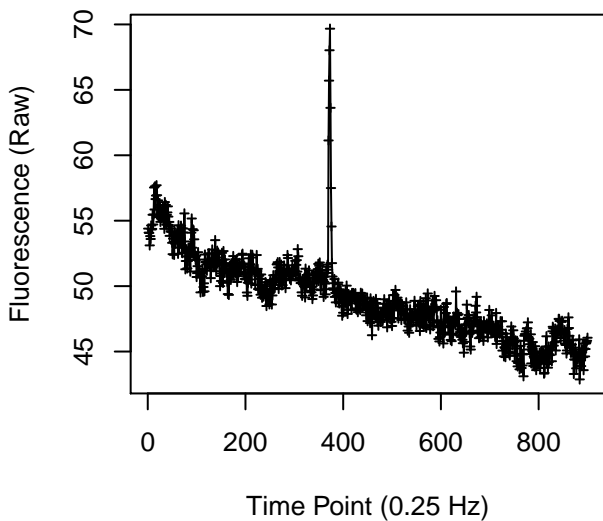

**Cell 2538**

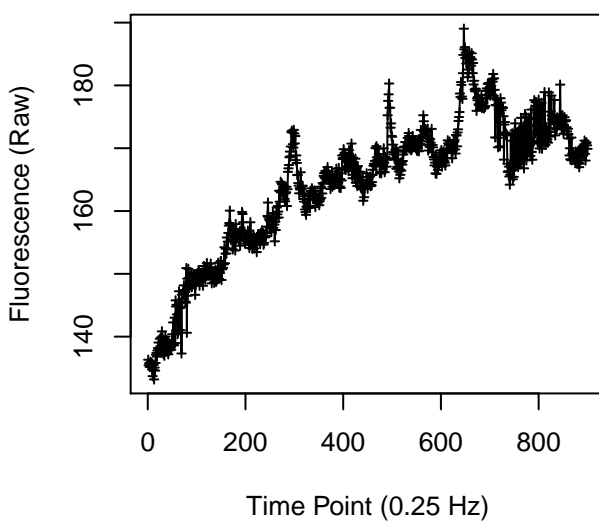

**Cell 2539**

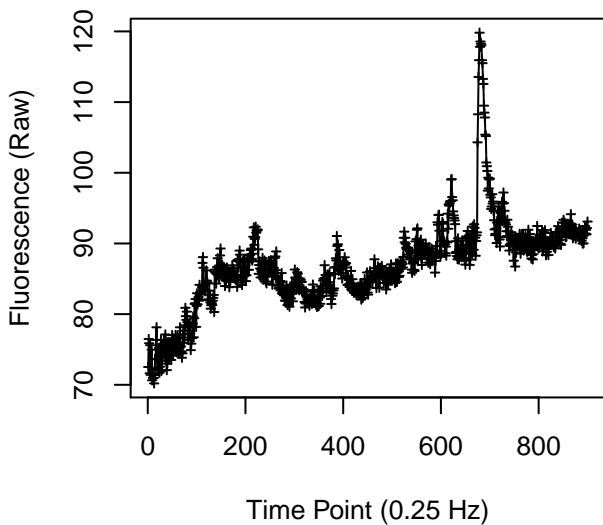

**Cell 2540**

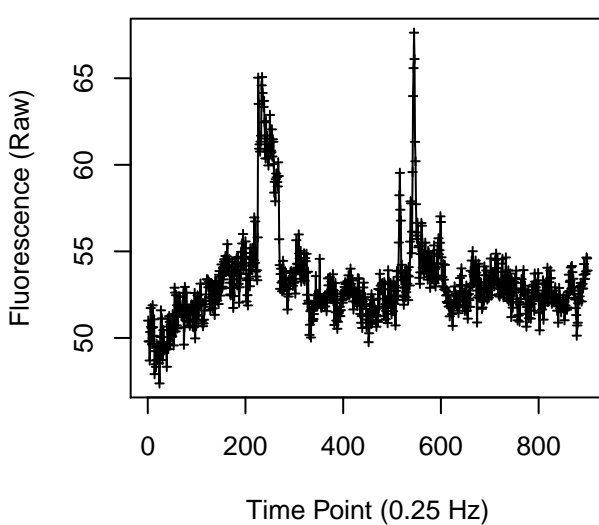

**Cell 2541**

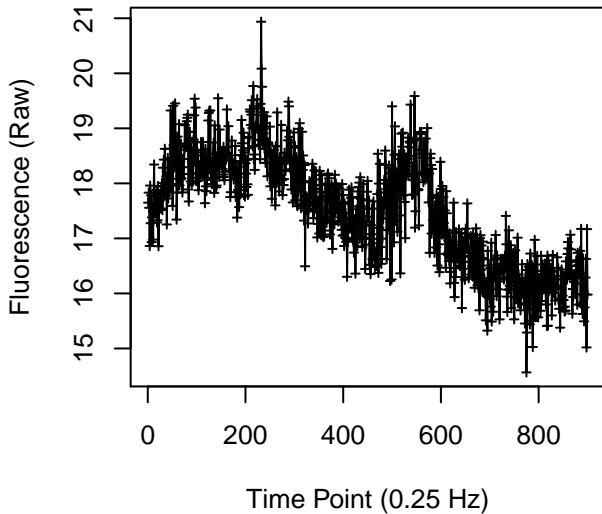

**Cell 2542**

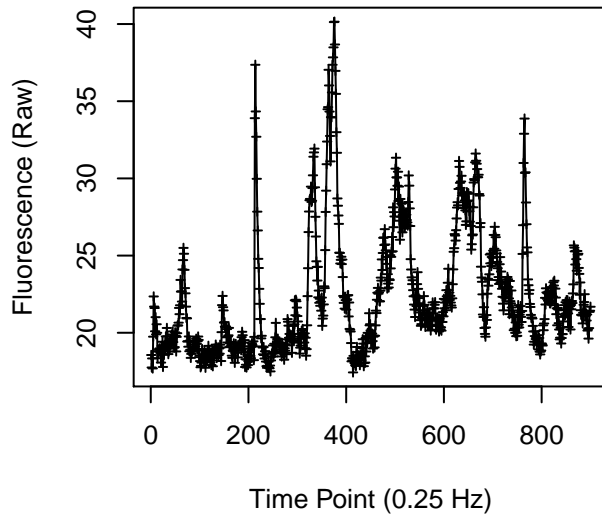

**Cell 2543**

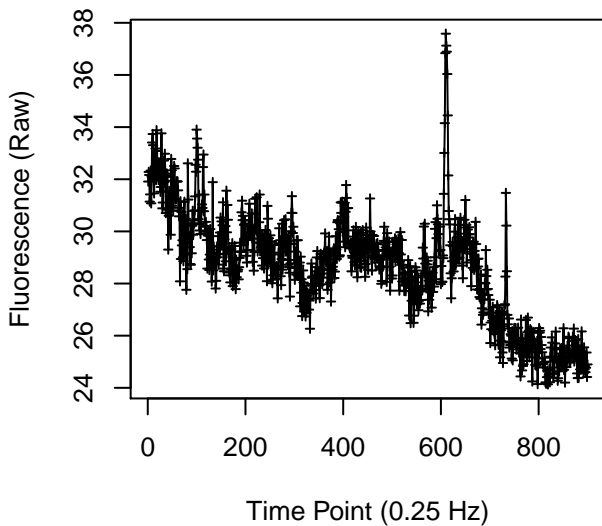

**Cell 2544**

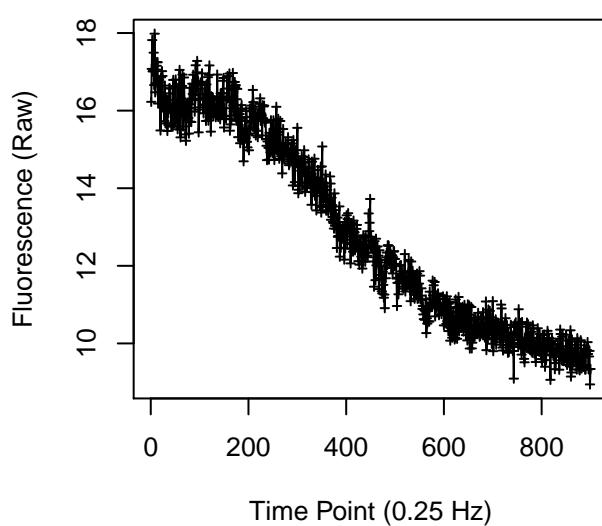

**Cell 2545**

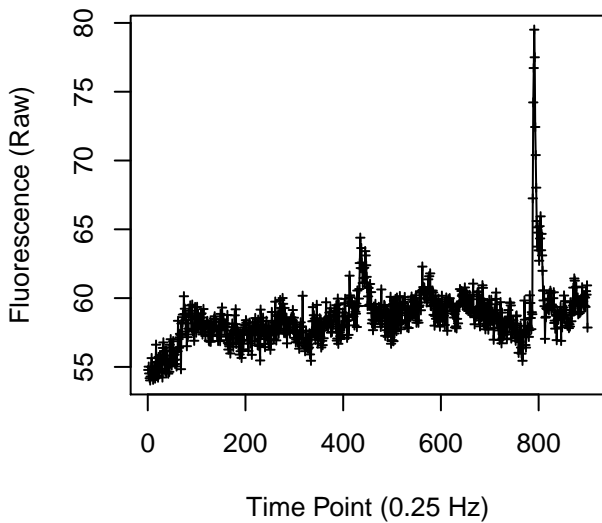

**Cell 2546**

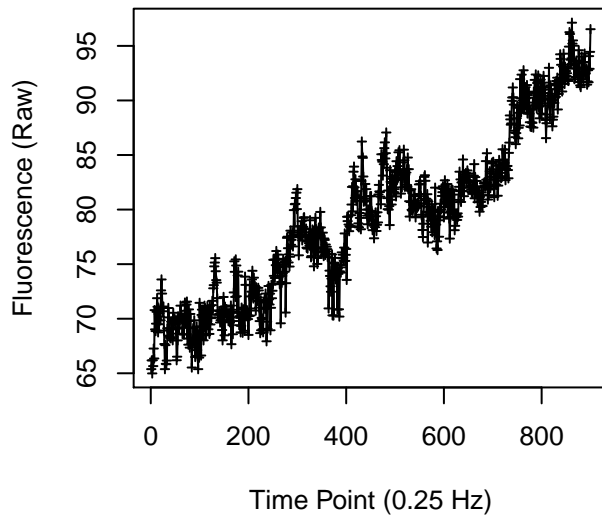

**Cell 2547**

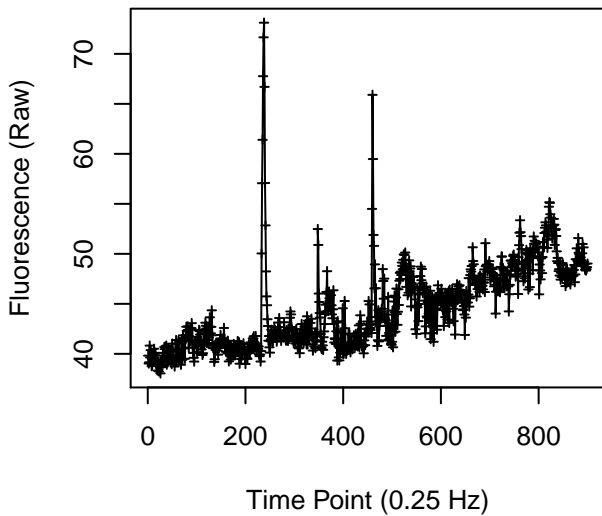

**Cell 2548**

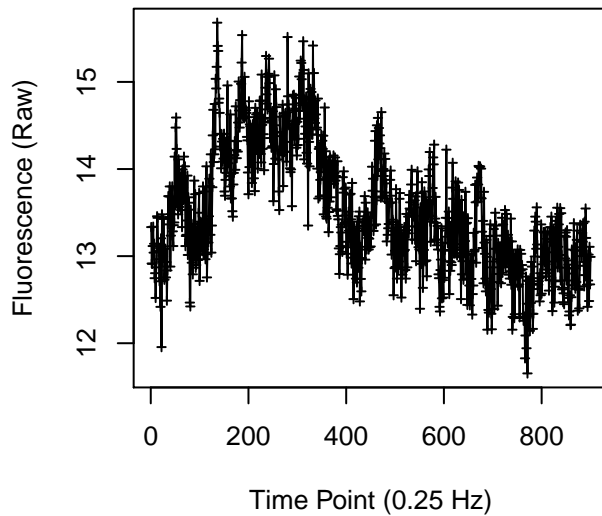

**Cell 2549**

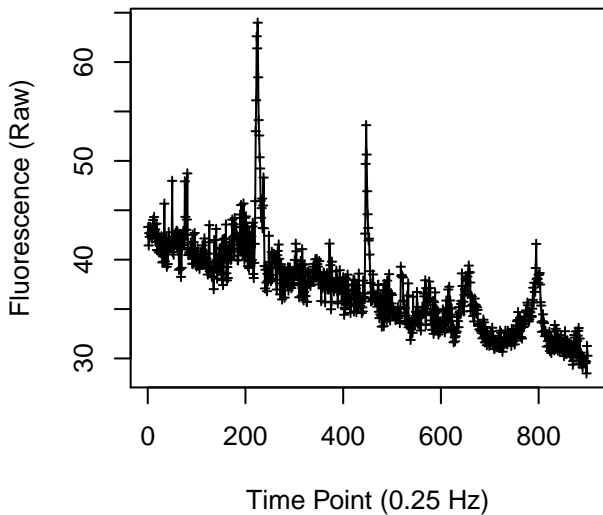

**Cell 2550**

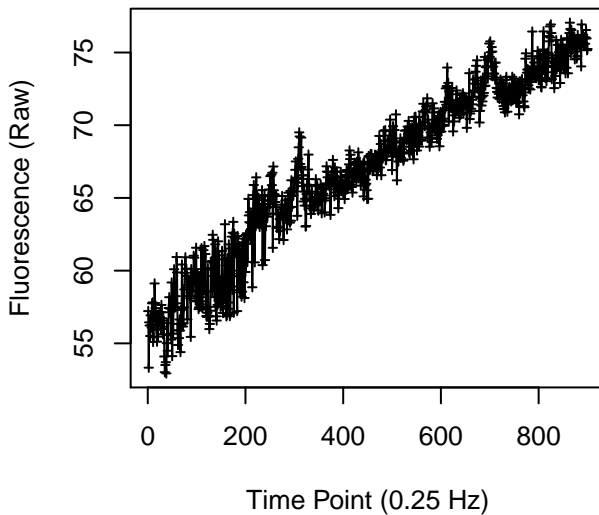

**Cell 2551**

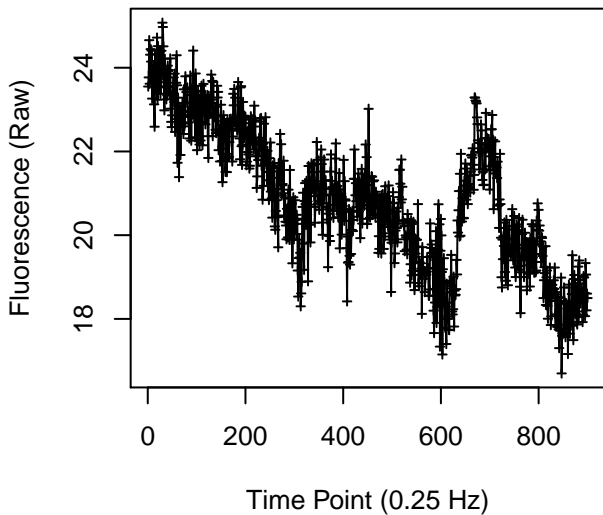

**Cell 2552**

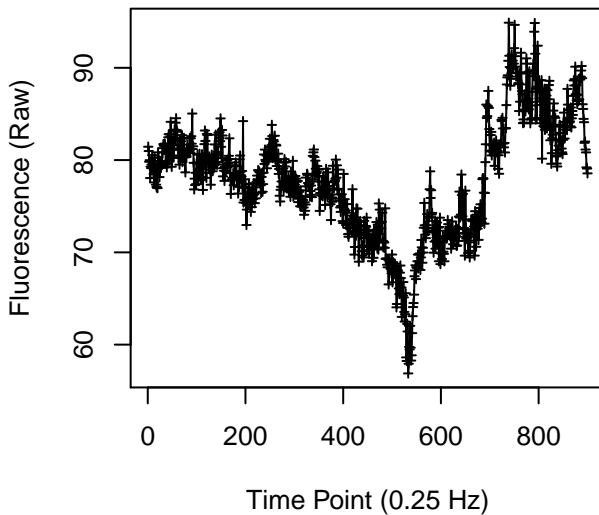

**Cell 2553**

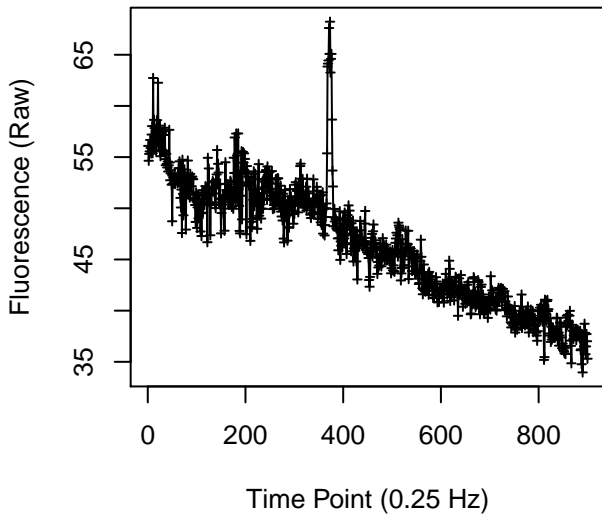

**Cell 2554**

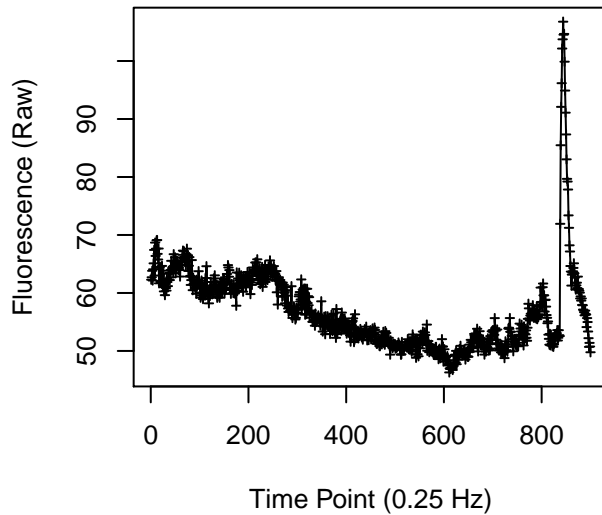

**Cell 2555**

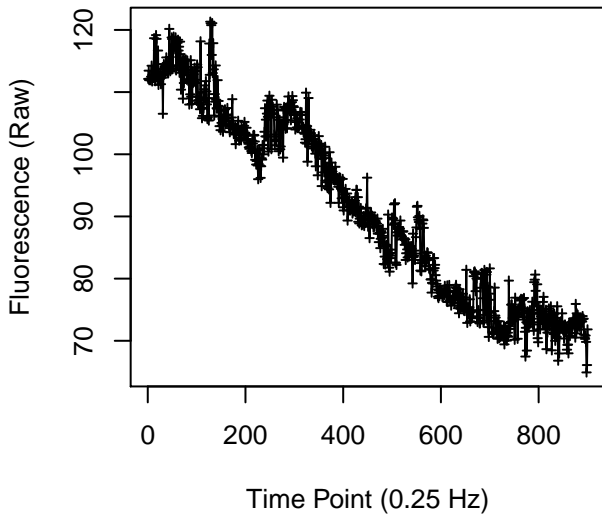

**Cell 2556**

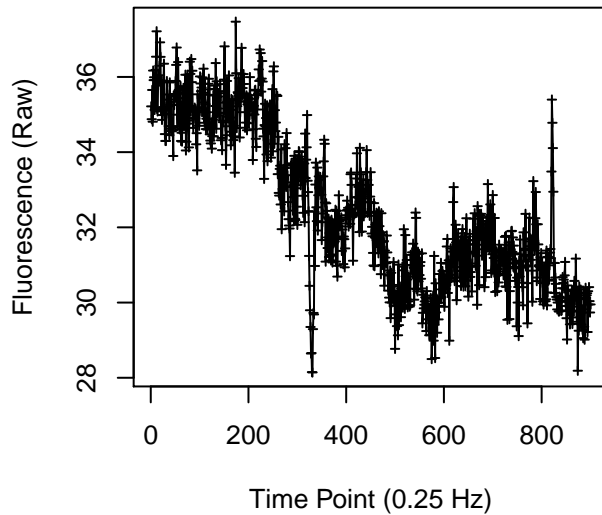

**Cell 2557**

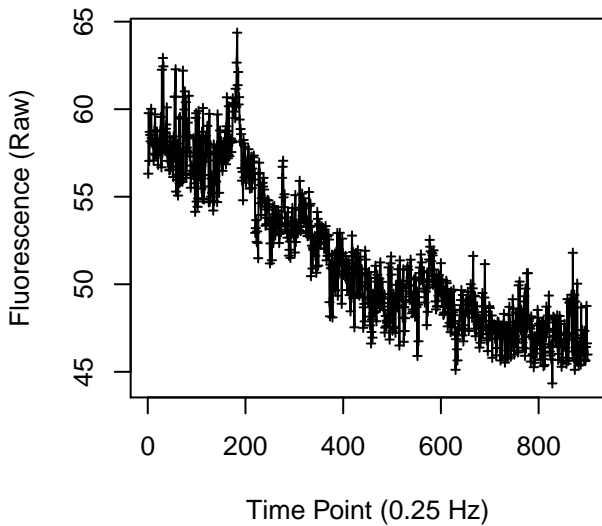

**Cell 2558**

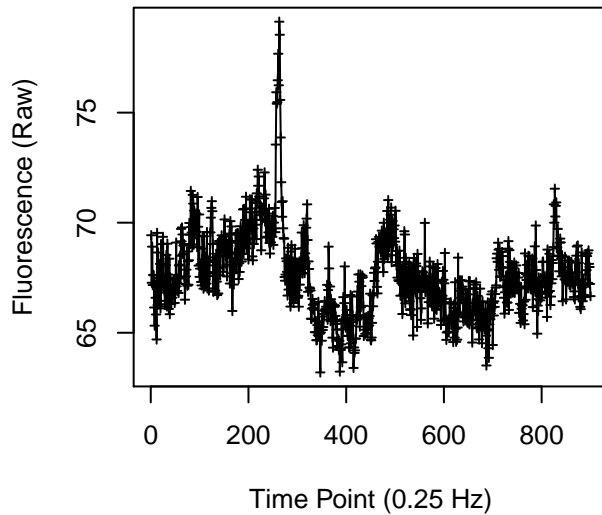

**Cell 2559**

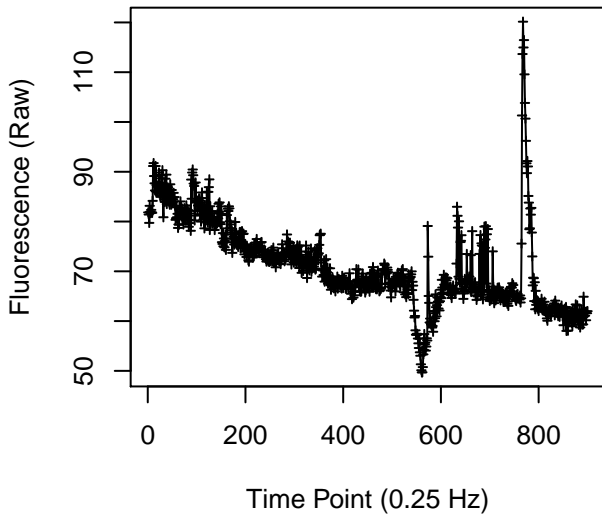

**Cell 2560**

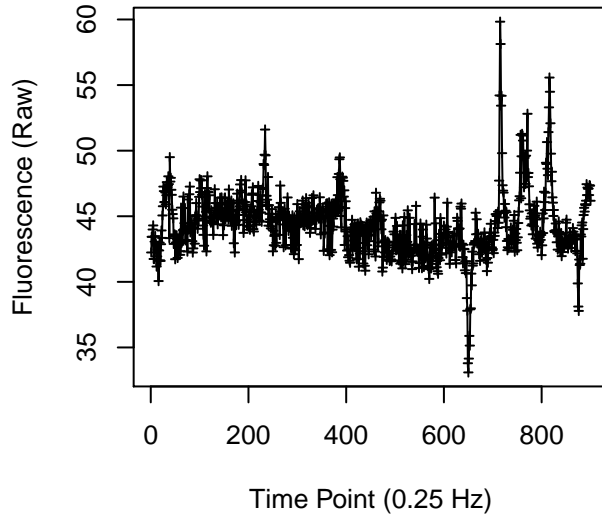

**Cell 2561**

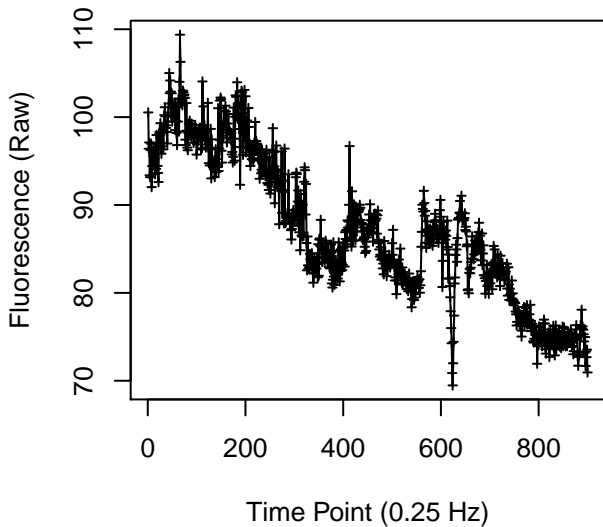

**Cell 2562**

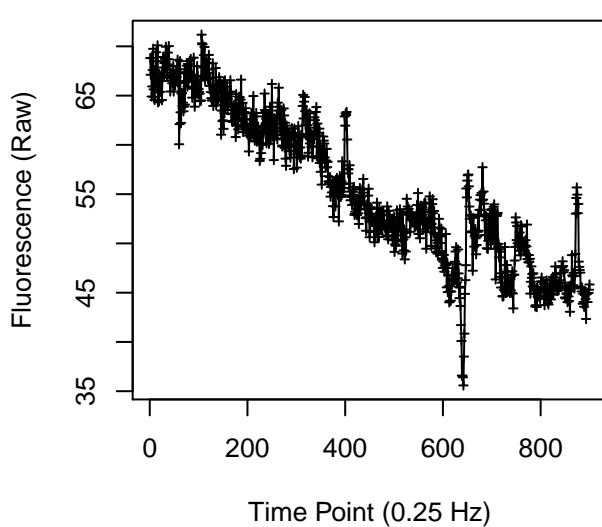

**Cell 2563**

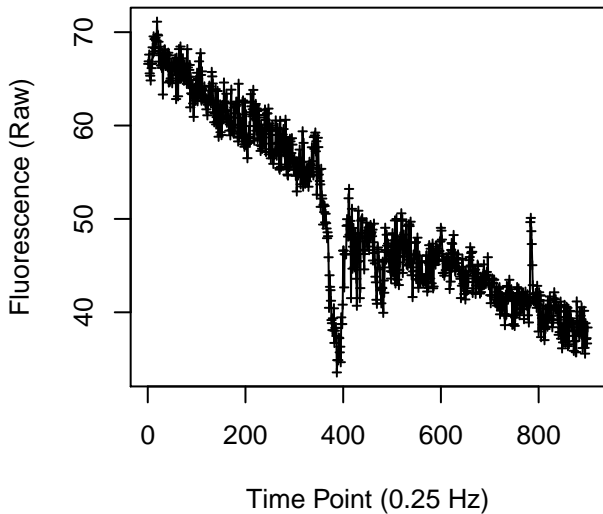

**Cell 2564**

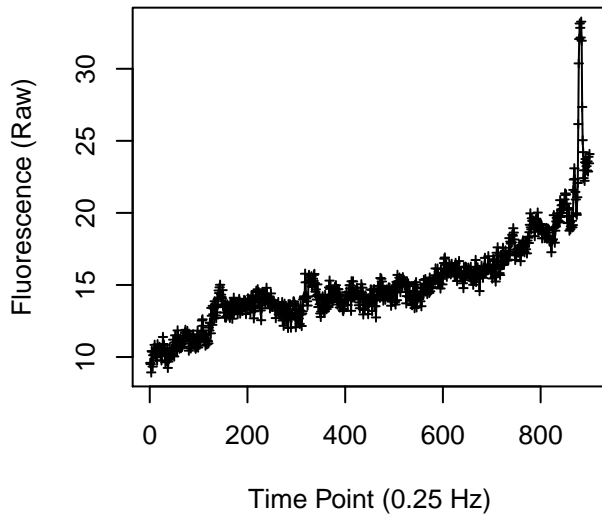

**Cell 2565**

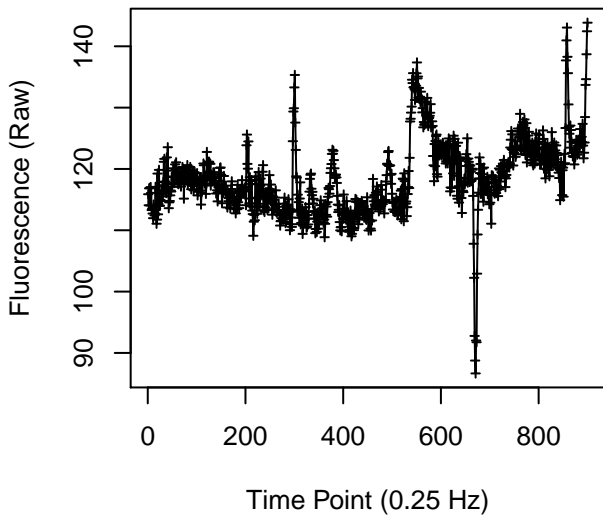

**Cell 2566**

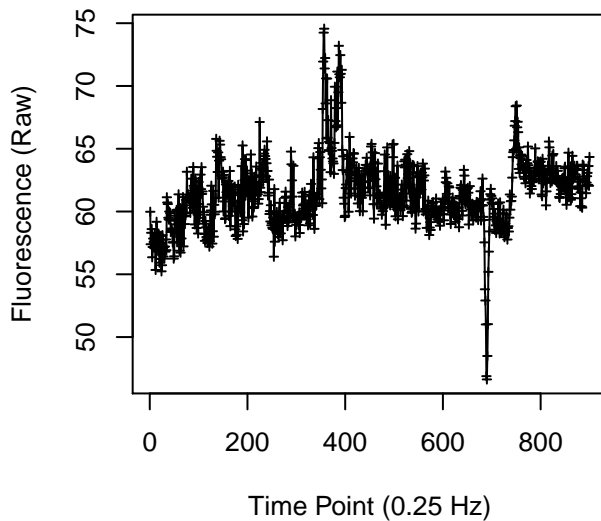

**Cell 2567**

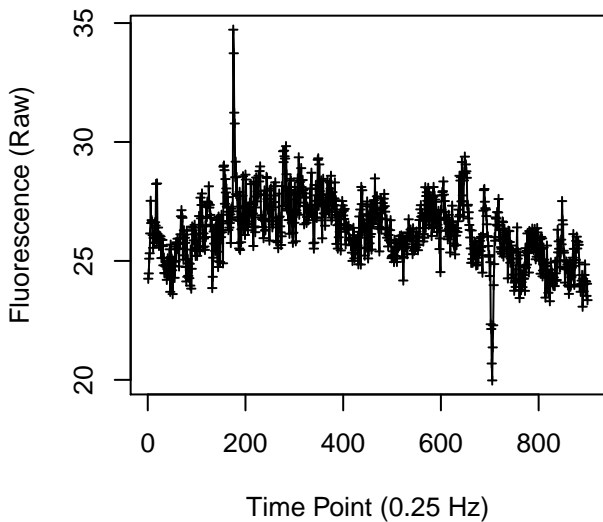

**Cell 2568**

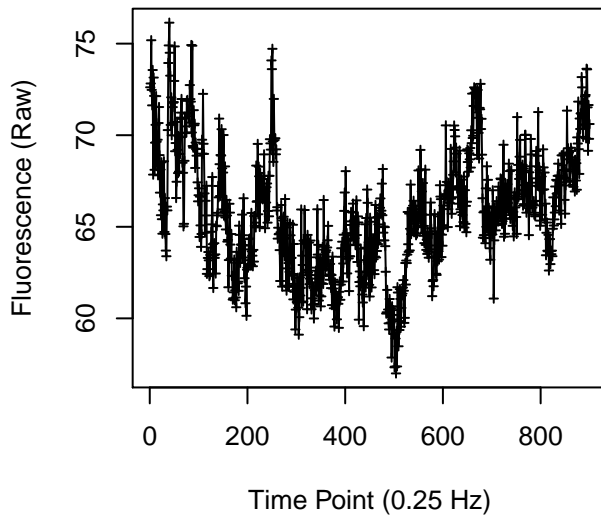



**Cell 2569**

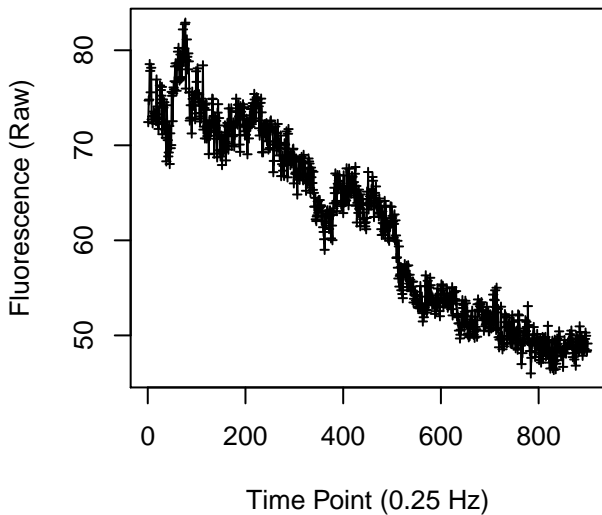

**Cell 2570**

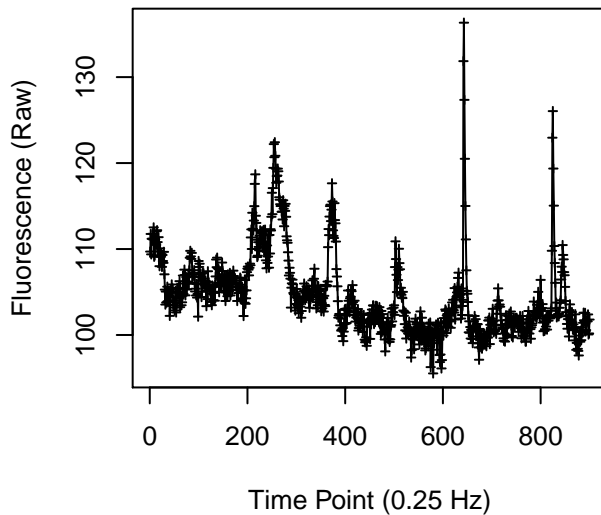

**Cell 2571**

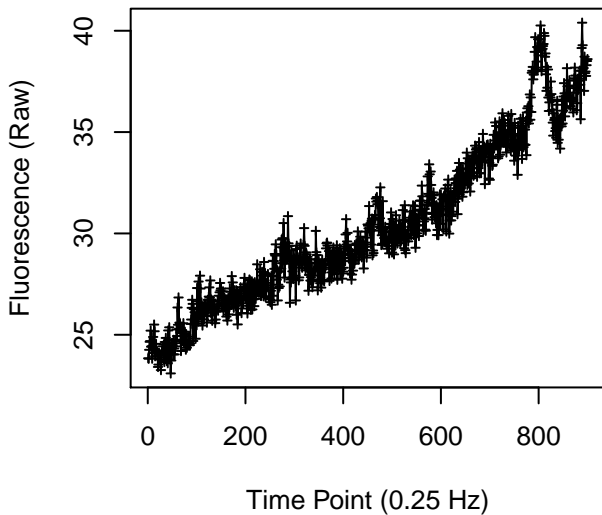

**Cell 2572**

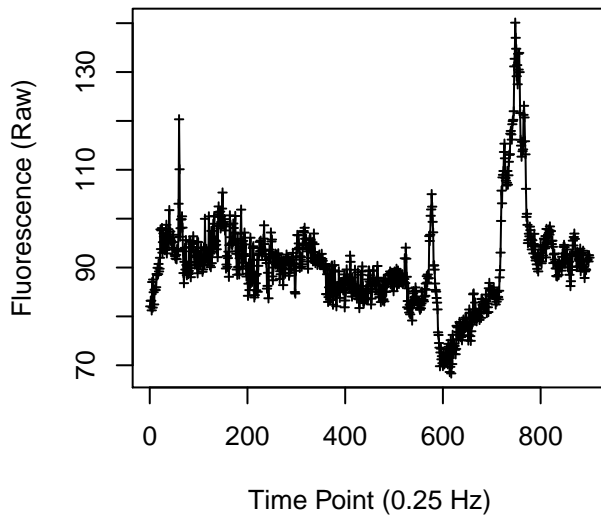

**Cell 2573**

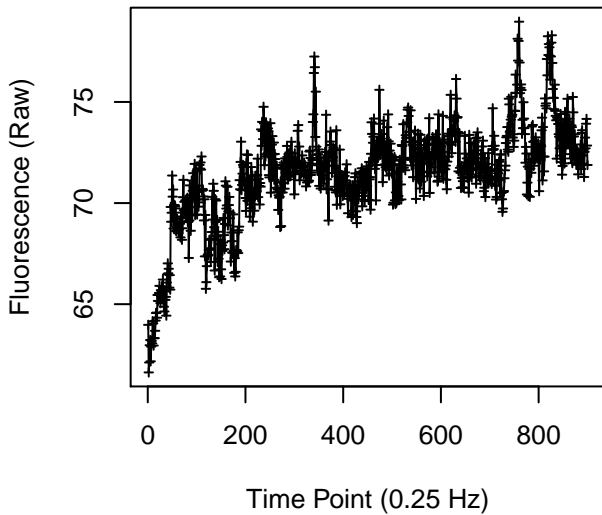

**Cell 2574**

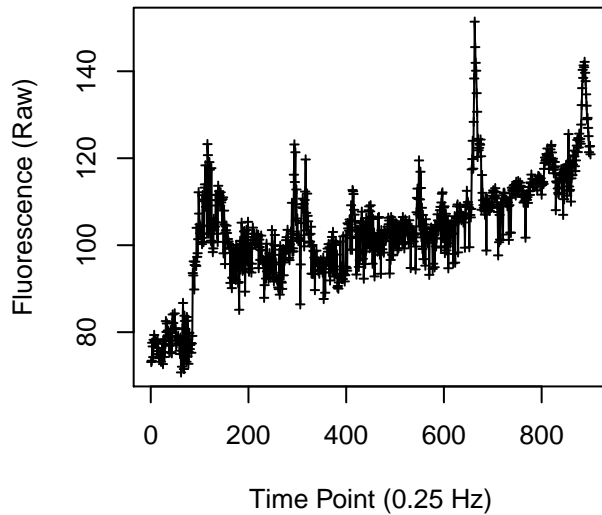

**Cell 2575**

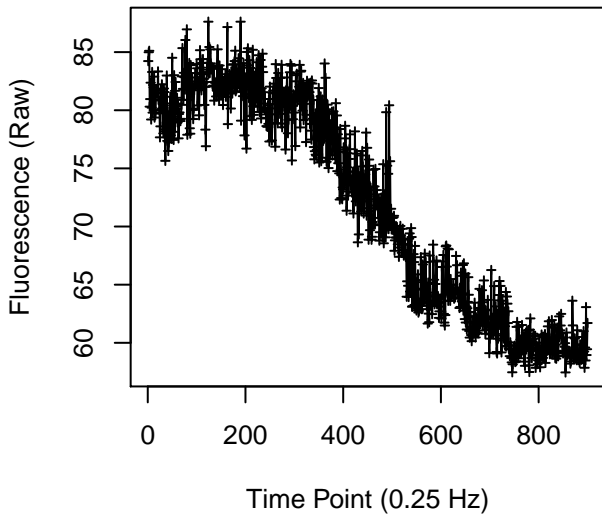

**Cell 2576**

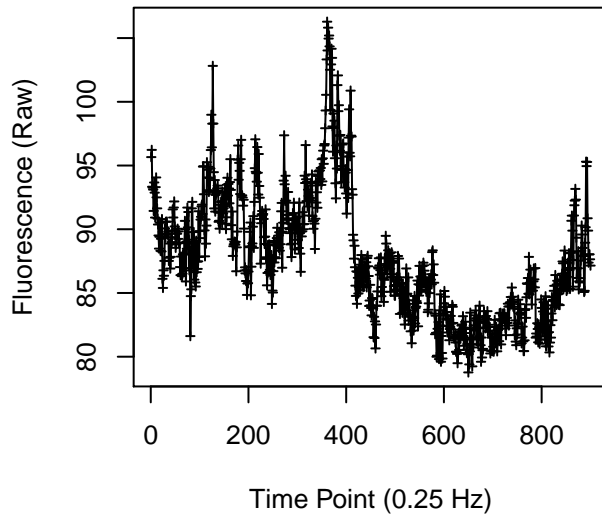

**Cell 2577**

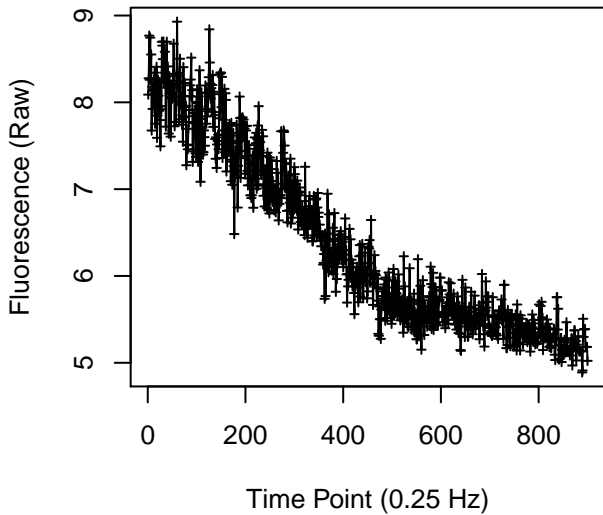

**Cell 2578**

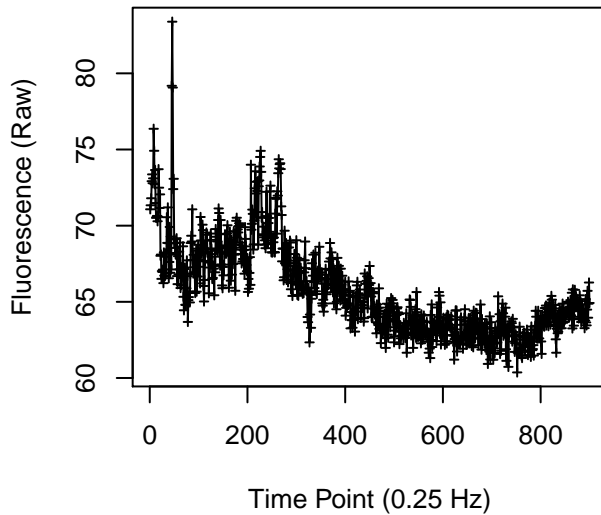

**Cell 2579**

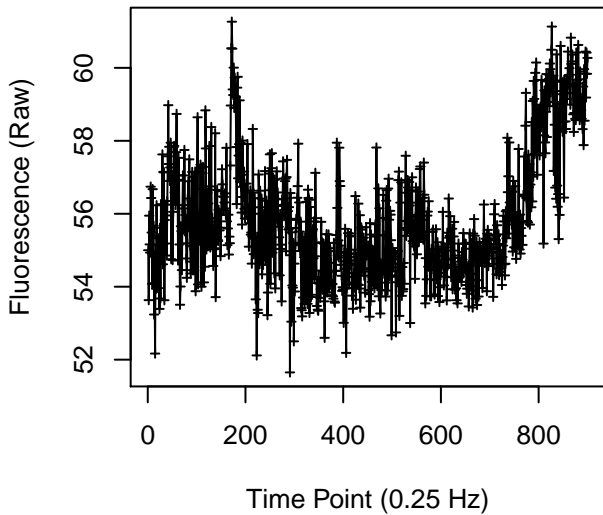

**Cell 2580**

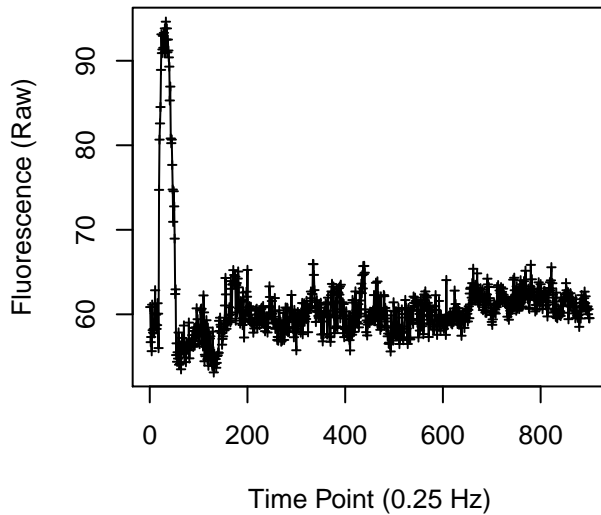

**Cell 2581**

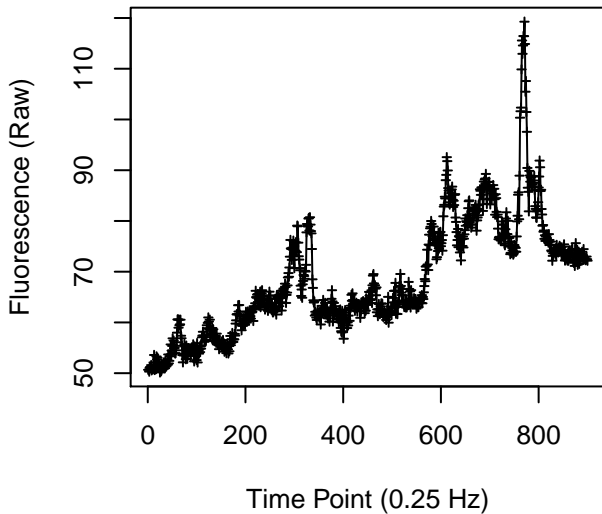

**Cell 2582**

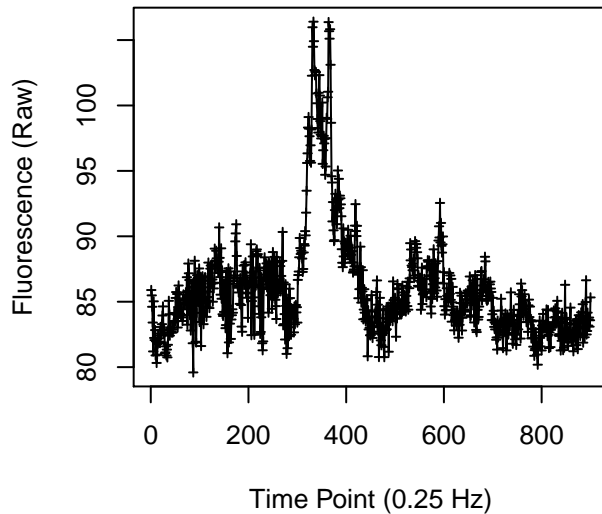

**Cell 2583**

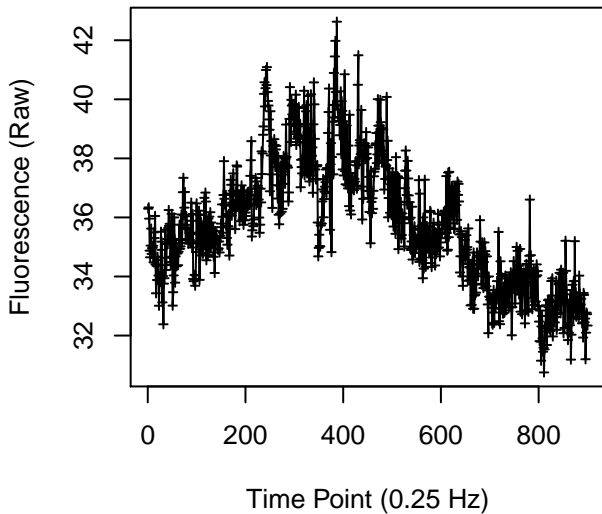

**Cell 2584**

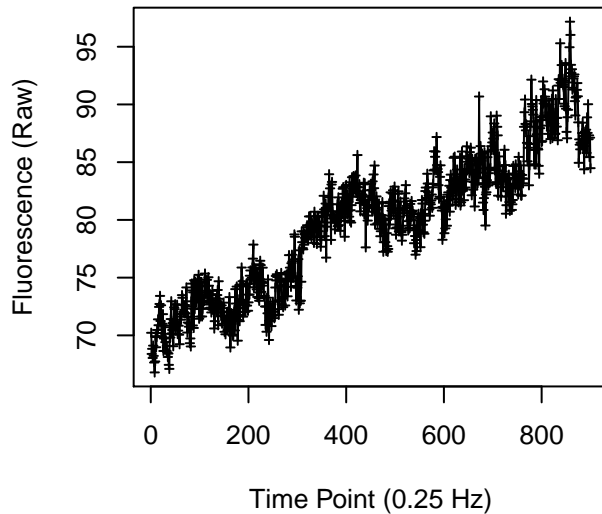

**Cell 2585**

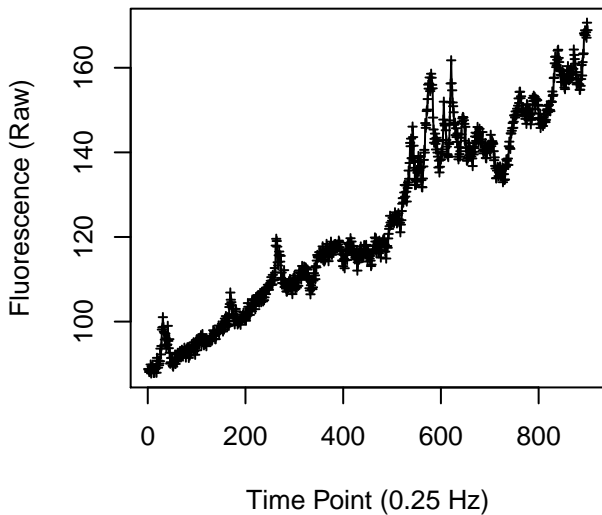

**Cell 2586**

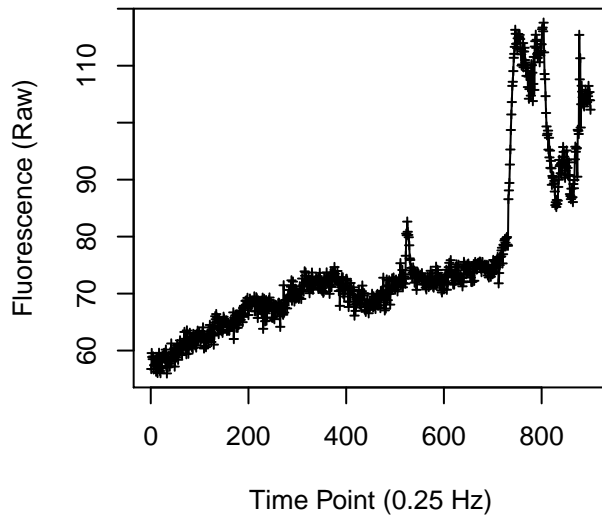

**Cell 2587**

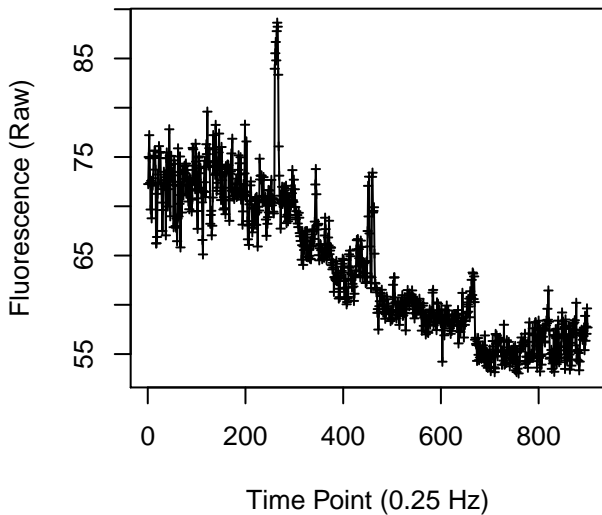

**Cell 2588**

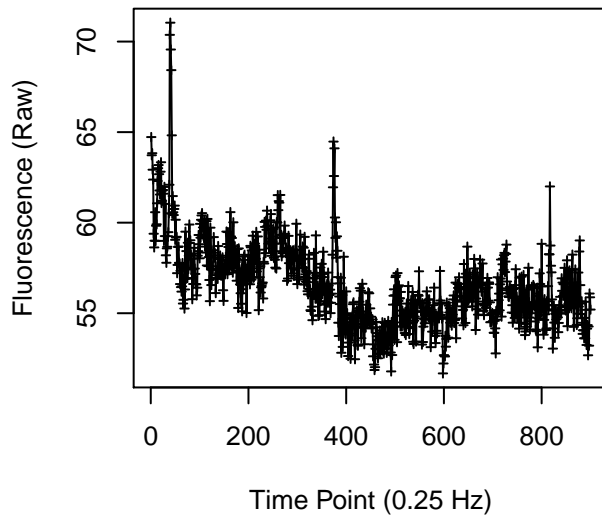

**Cell 2589**

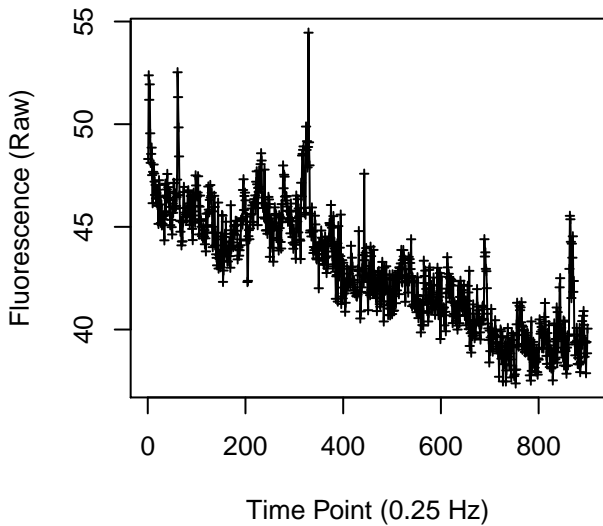

**Cell 2590**

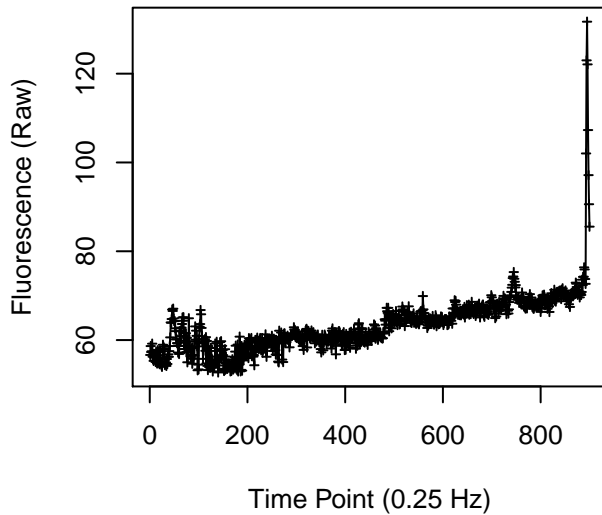

**Cell 2591**

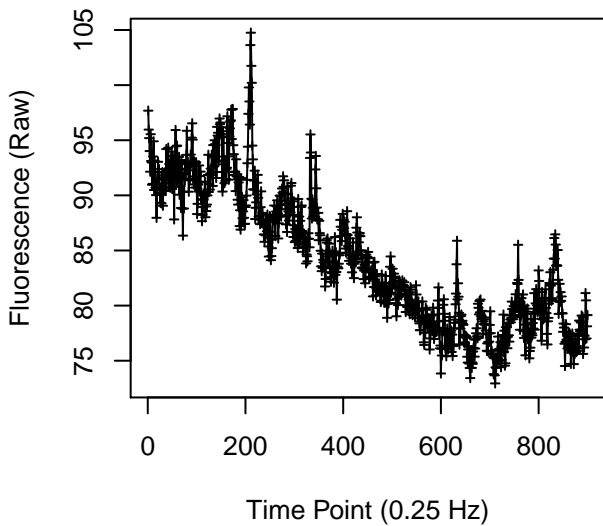

**Cell 2592**

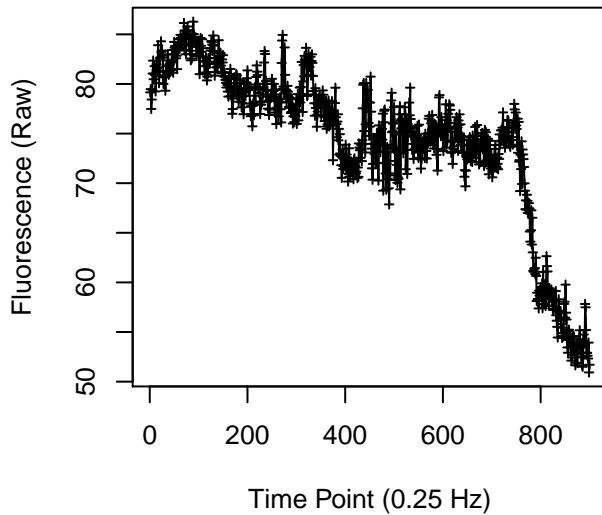

**Cell 2593**

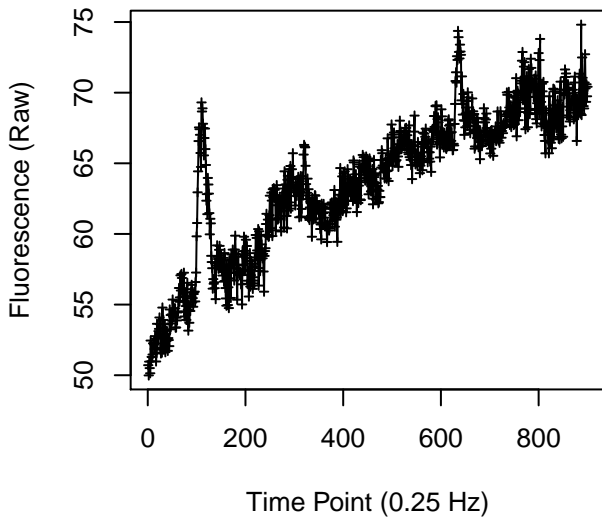

**Cell 2594**

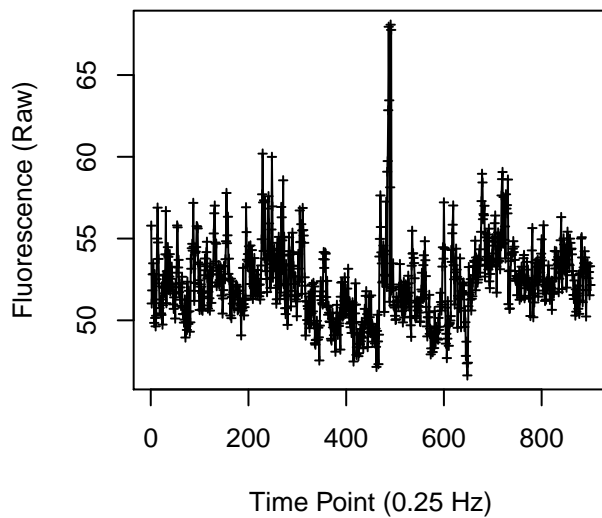

**Cell 2595**

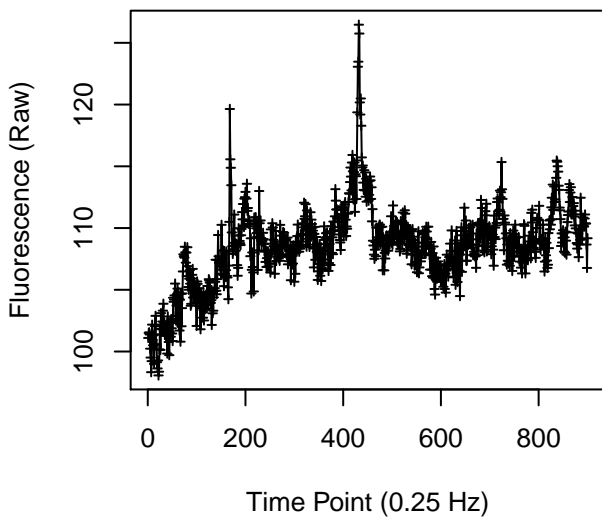

**Cell 2596**

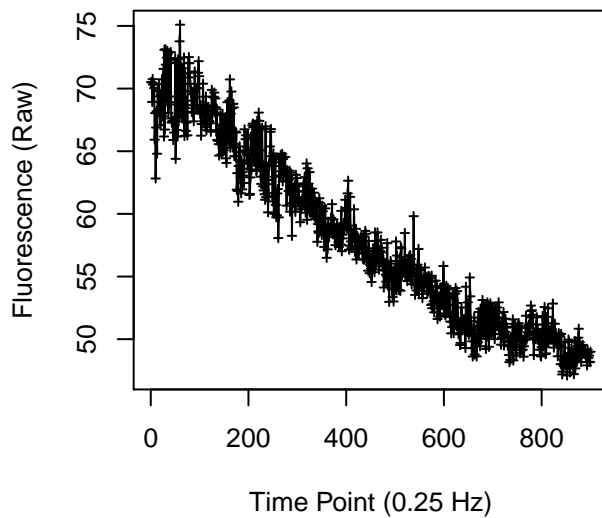

**Cell 2597**

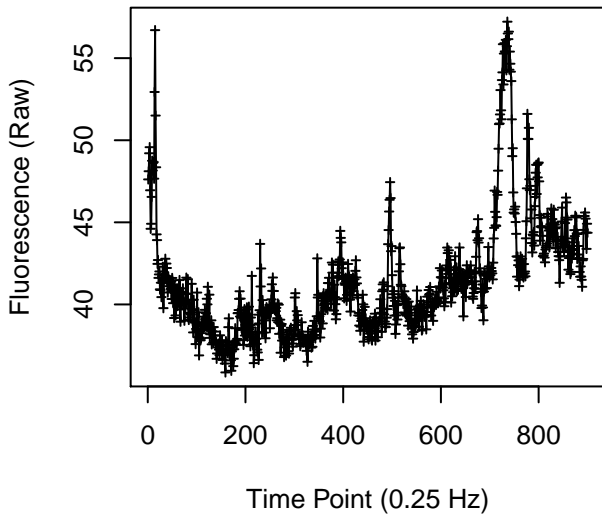

**Cell 2598**

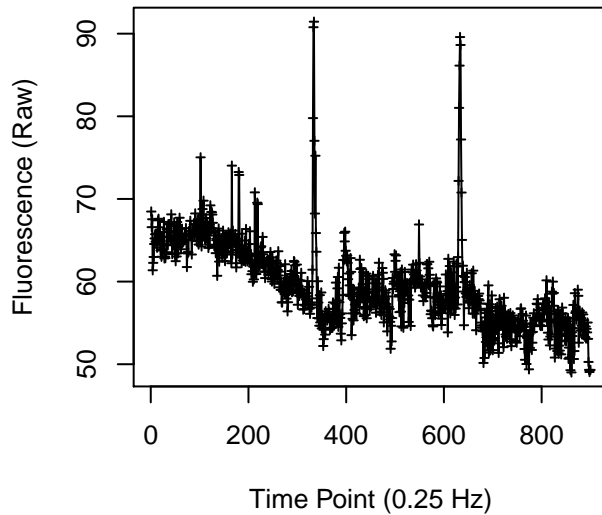

**Cell 2599**

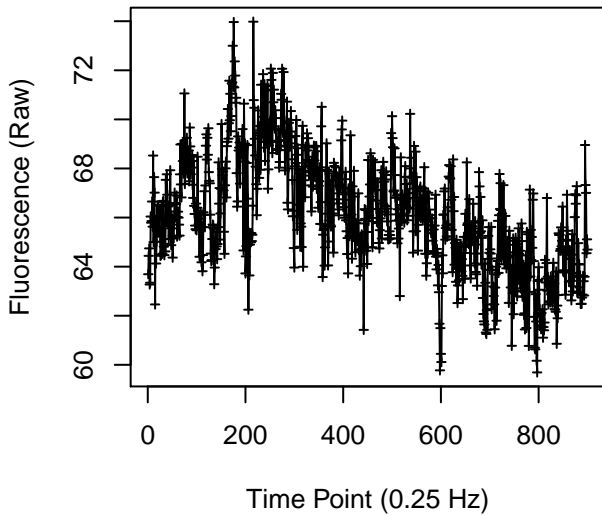

**Cell 2600**

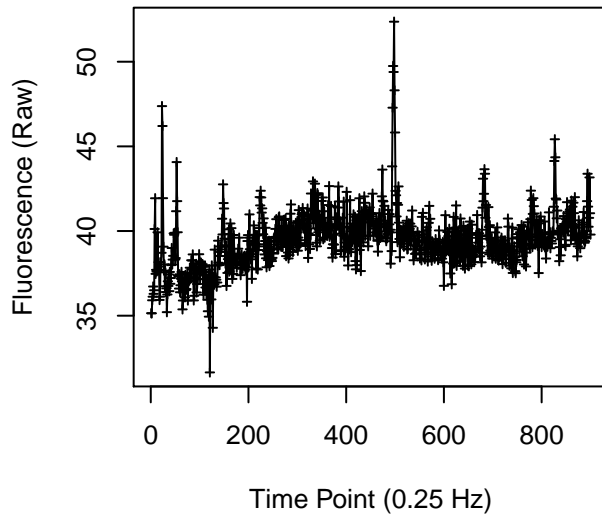



**Cell 2601**

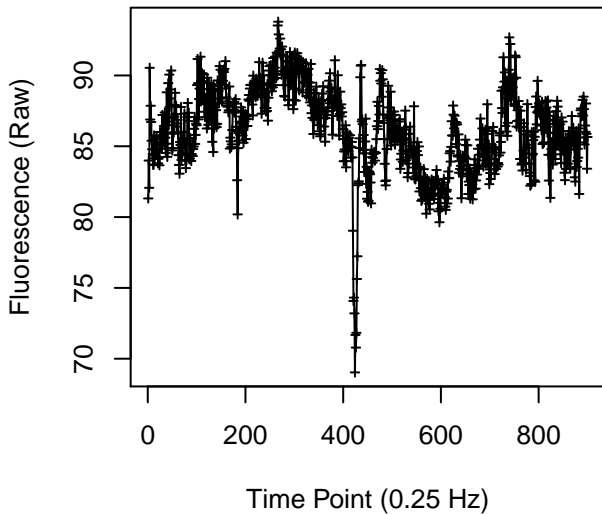

**Cell 2602**

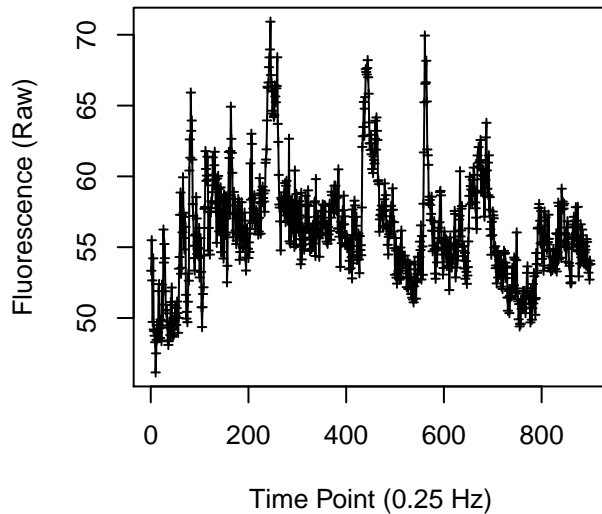

**Cell 2603**

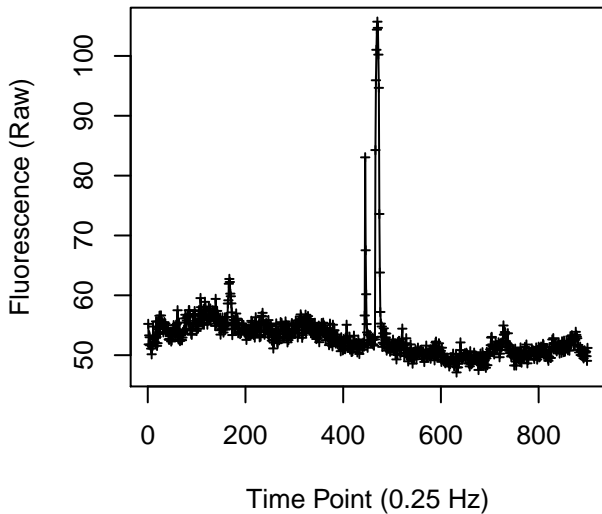

**Cell 2604**

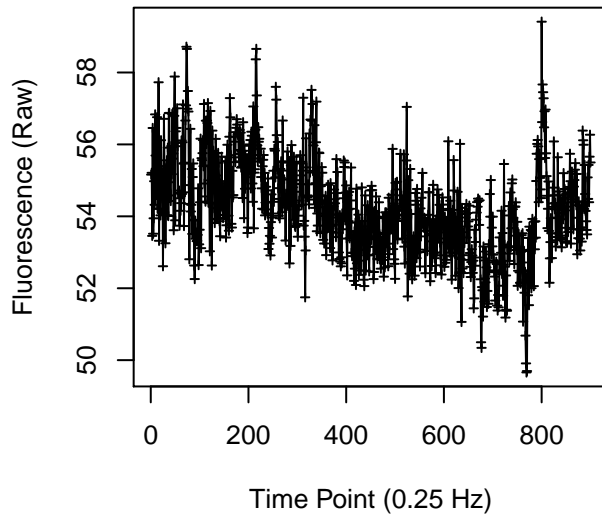

**Cell 2605**

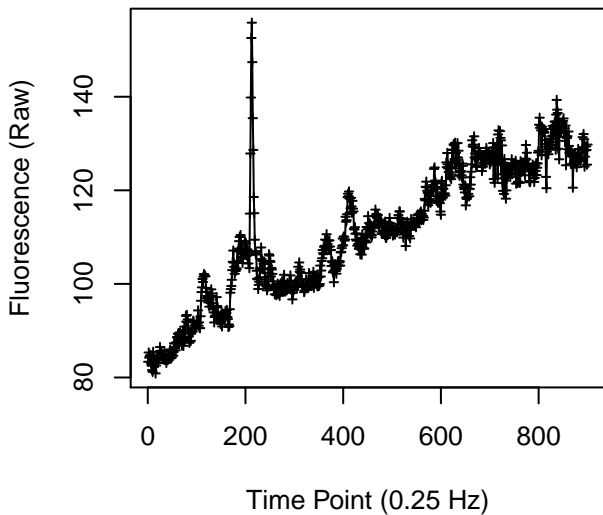

**Cell 2606**

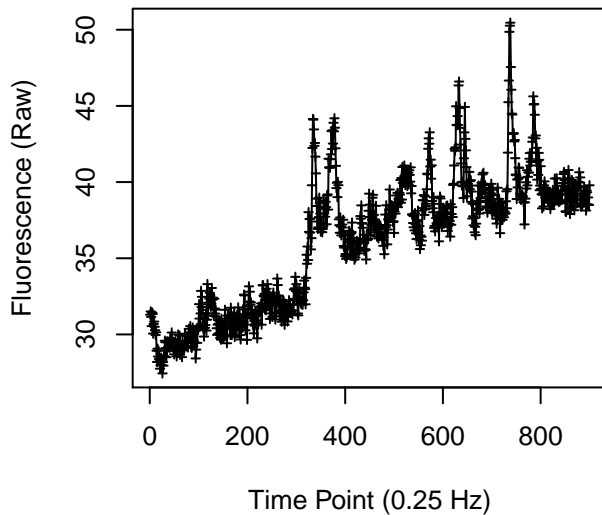

**Cell 2607**

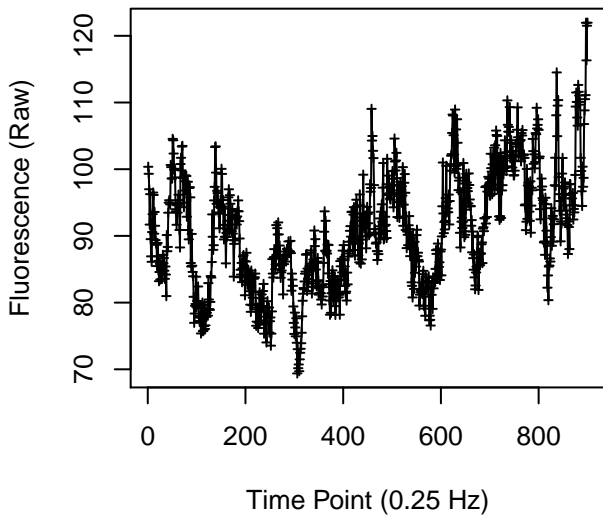

**Cell 2608**

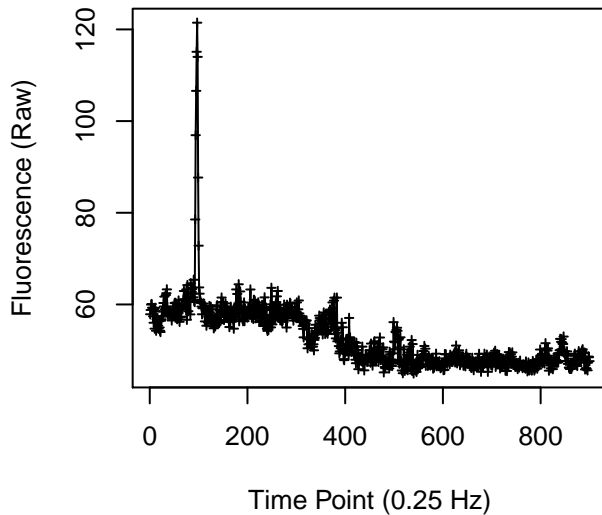

**Cell 2609**

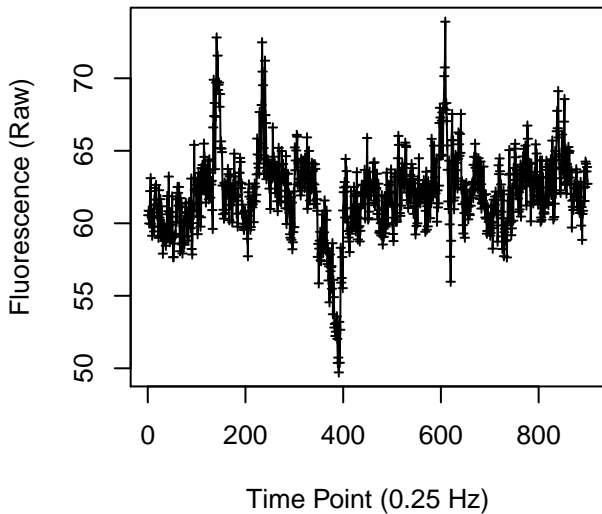

**Cell 2610**

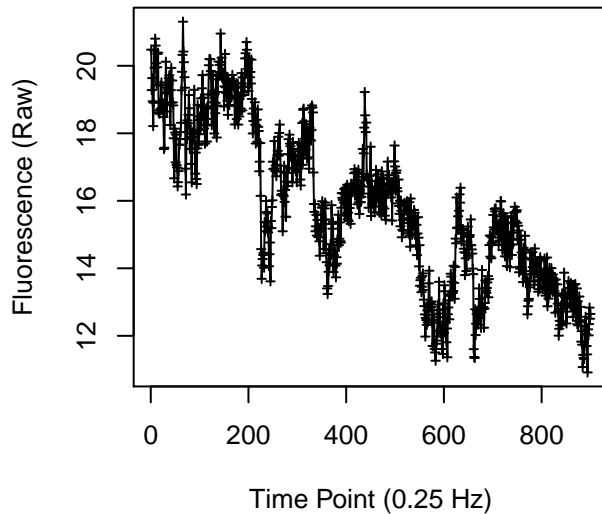

**Cell 2611**

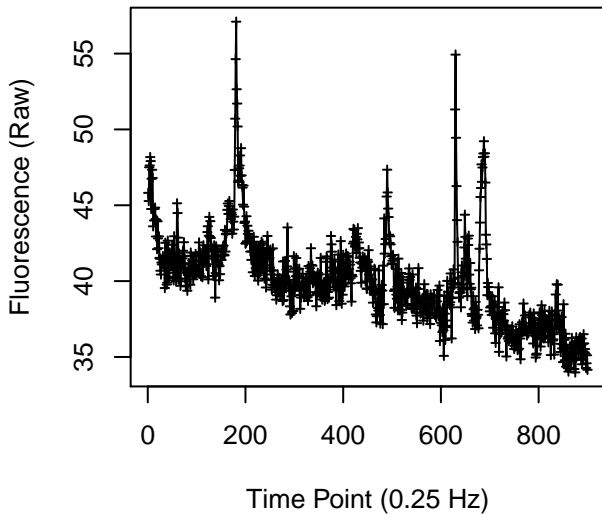

**Cell 2612**

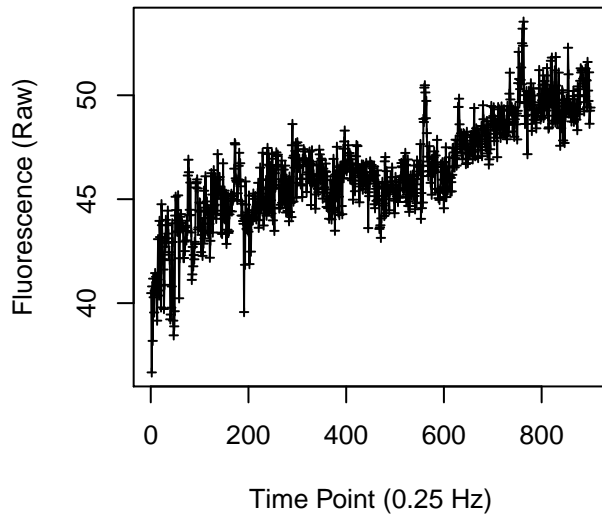

**Cell 2613**

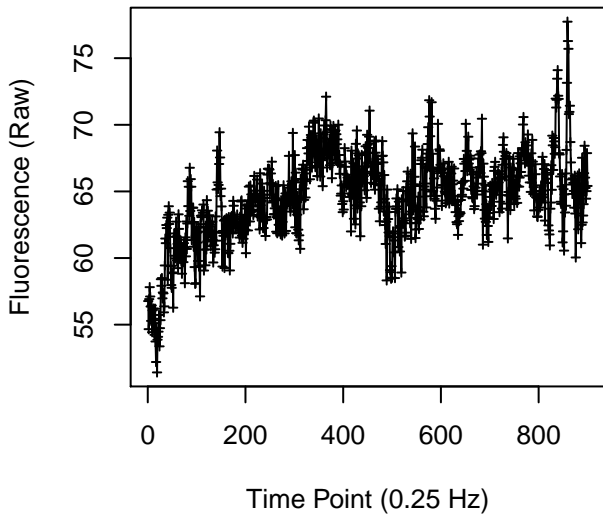

**Cell 2614**

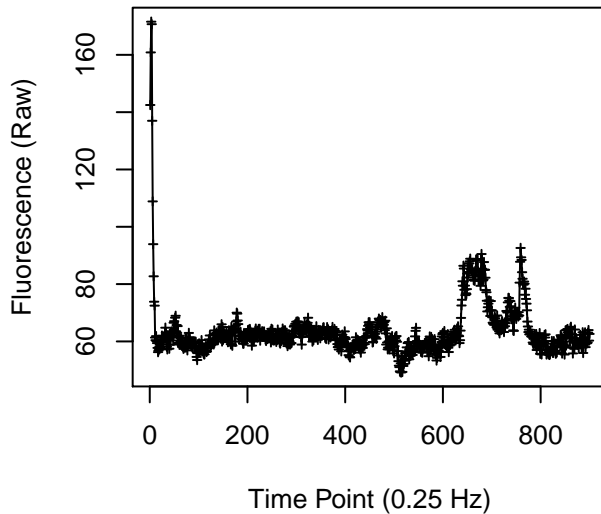

**Cell 2615**

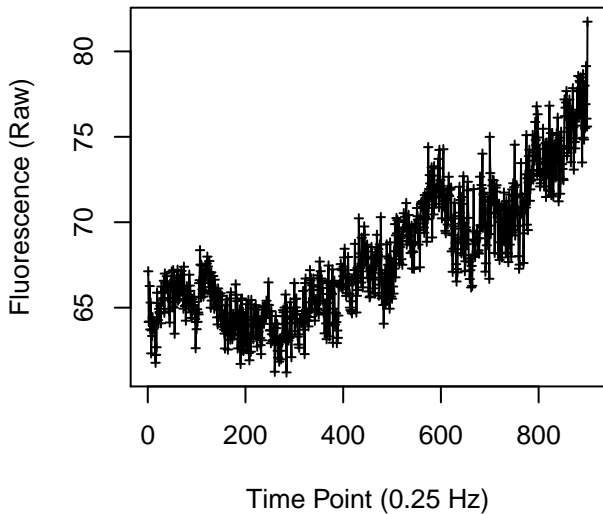

**Cell 2616**

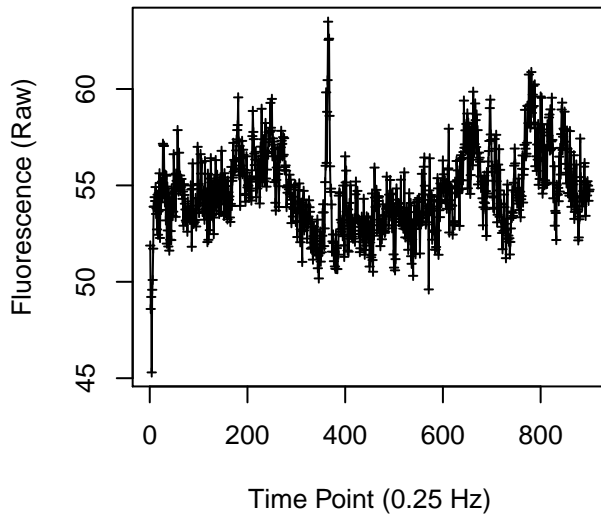

**Cell 2617**

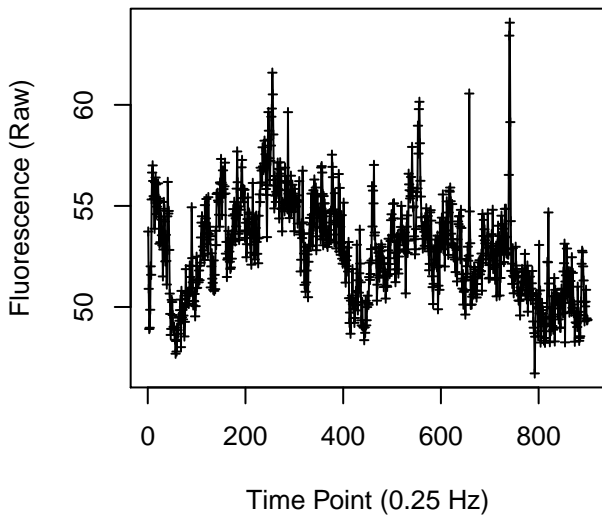

**Cell 2618**

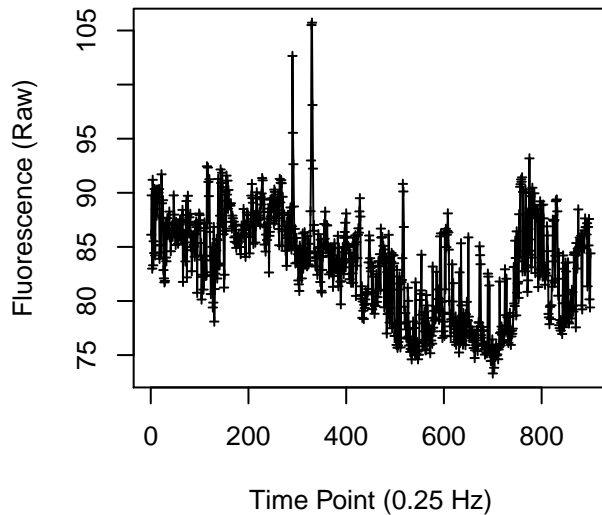

**Cell 2619**

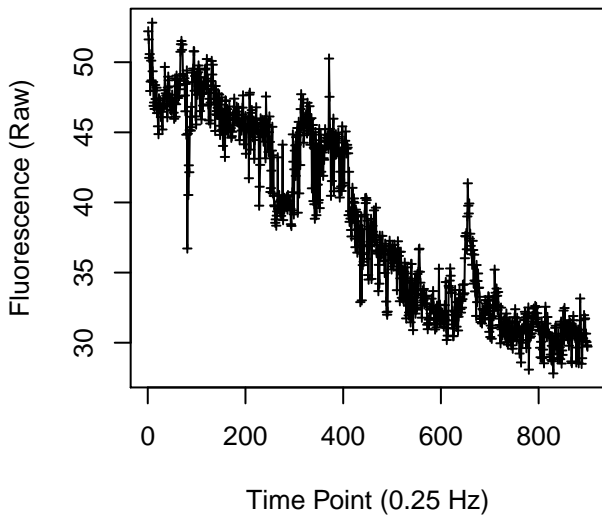

**Cell 2620**

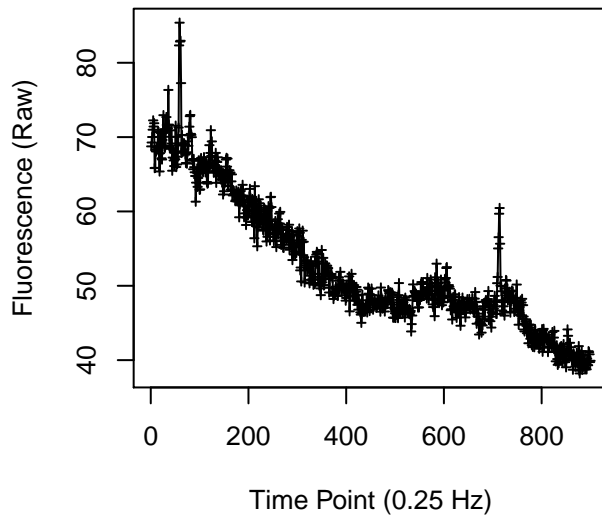

**Cell 2621**

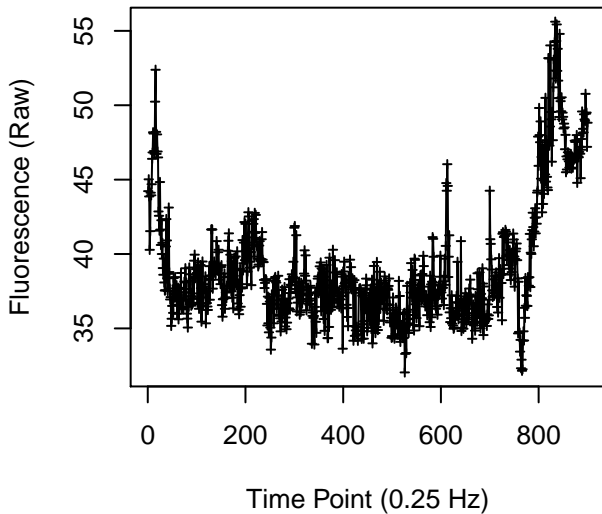

**Cell 2622**

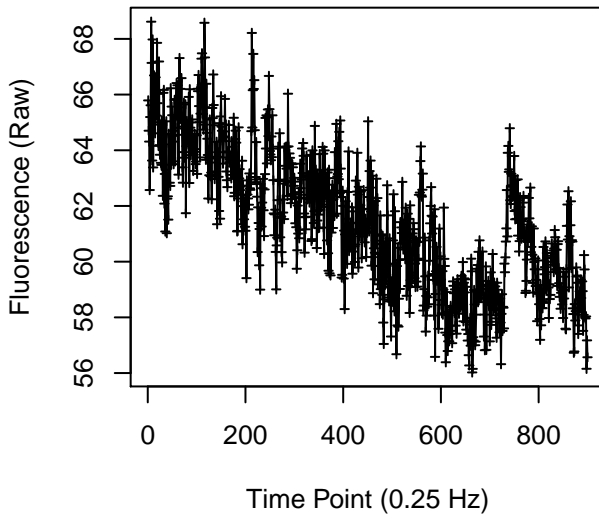

**Cell 2623**

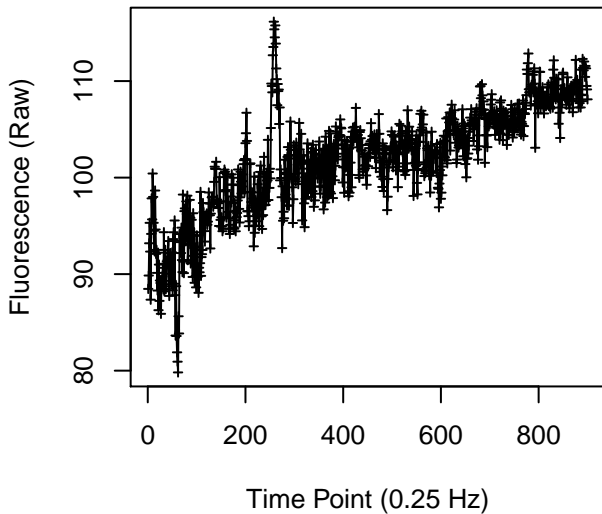

**Cell 2624**

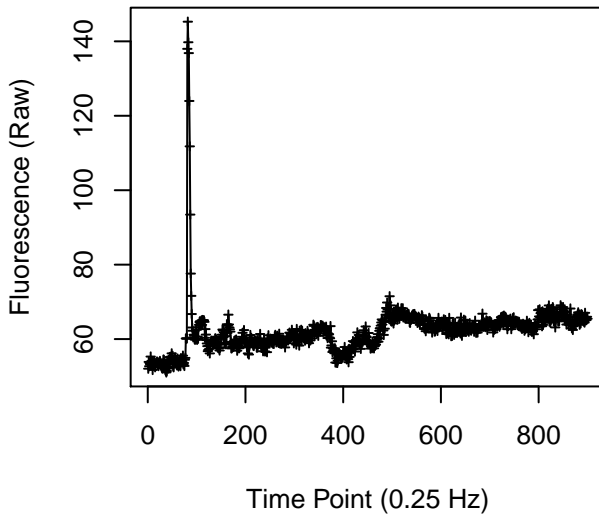

**Cell 2625**

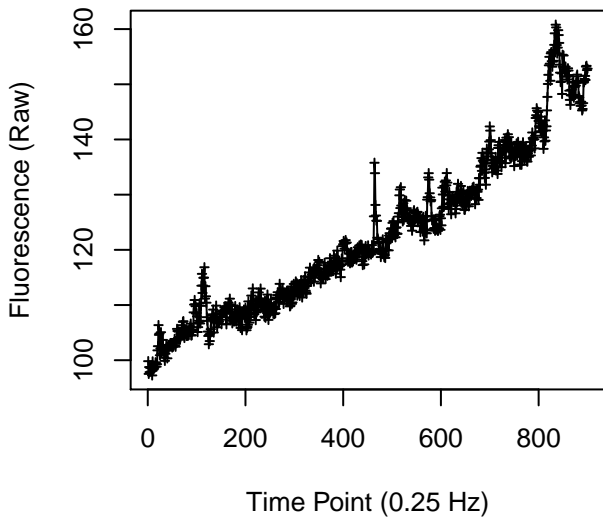

**Cell 2626**

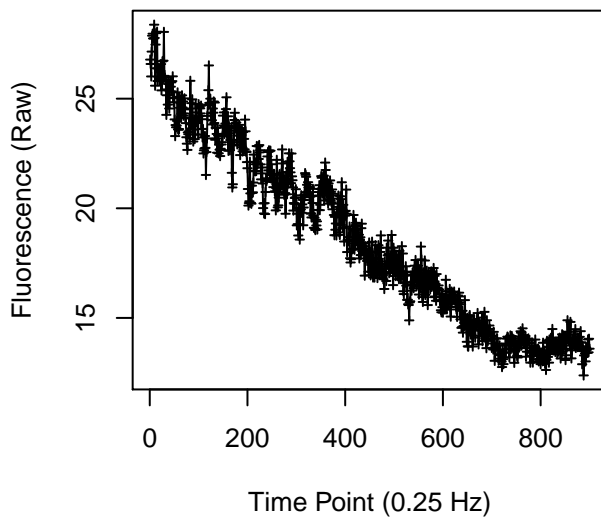

**Cell 2627**

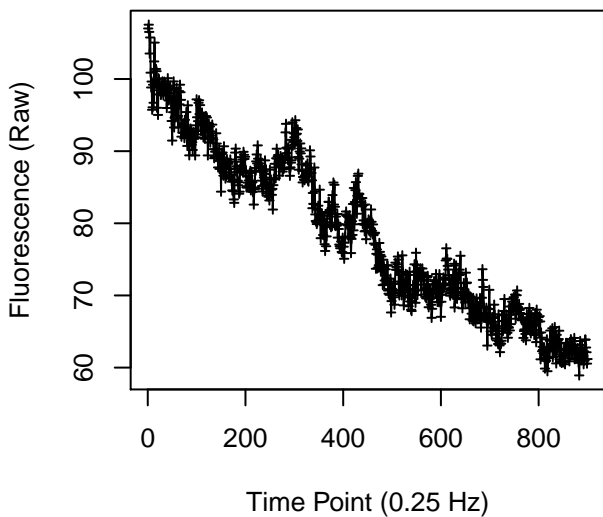

**Cell 2628**

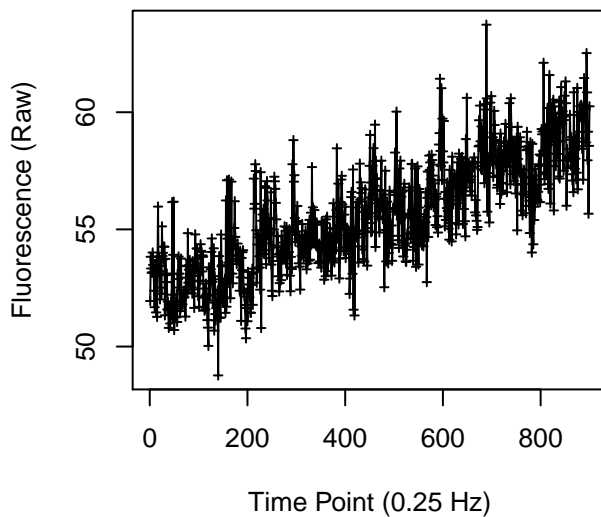

**Cell 2629**

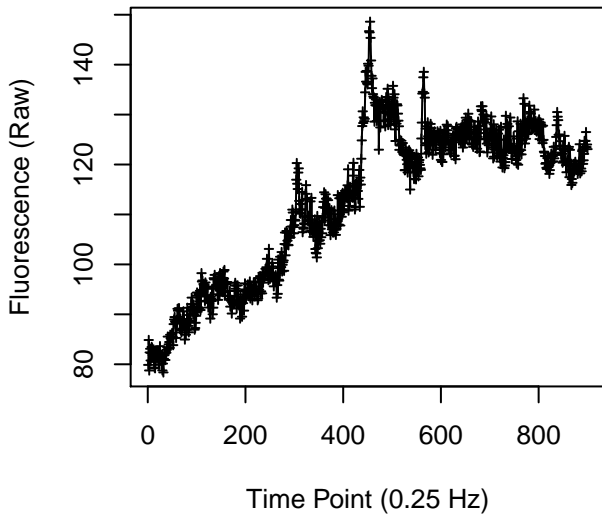

**Cell 2630**

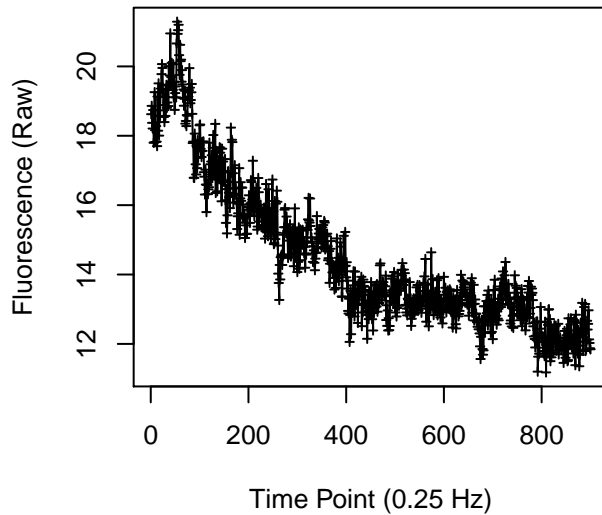

**Cell 2631**

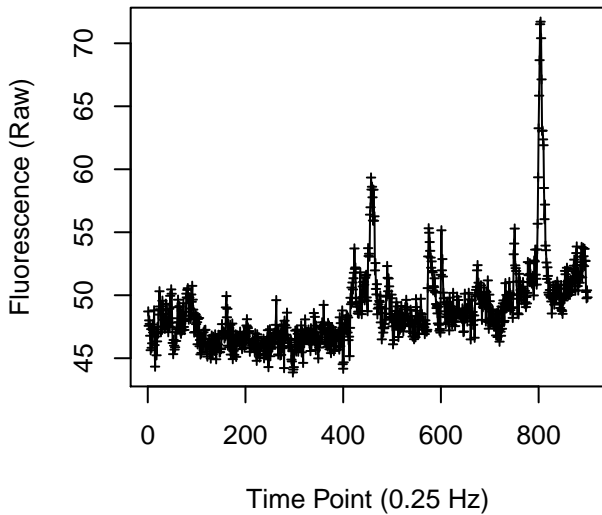

**Cell 2632**

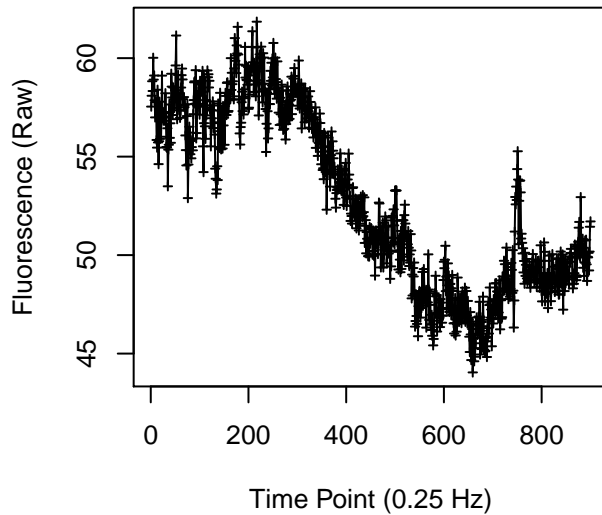



**Cell 2633**

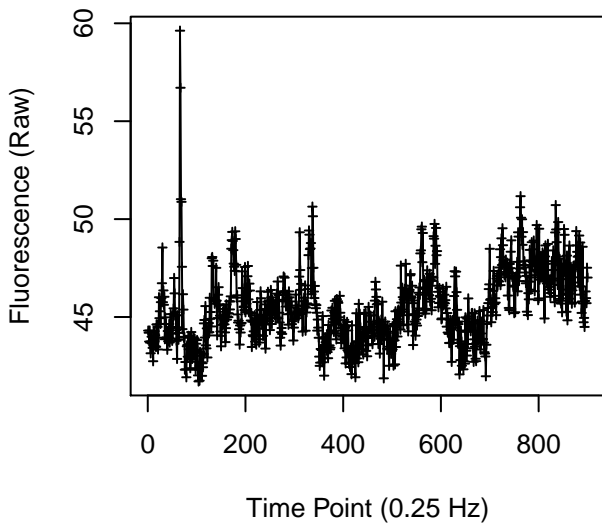

**Cell 2634**

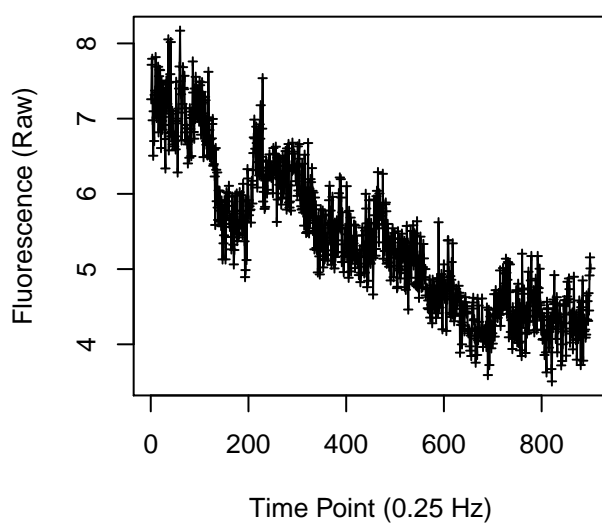

**Cell 2635**

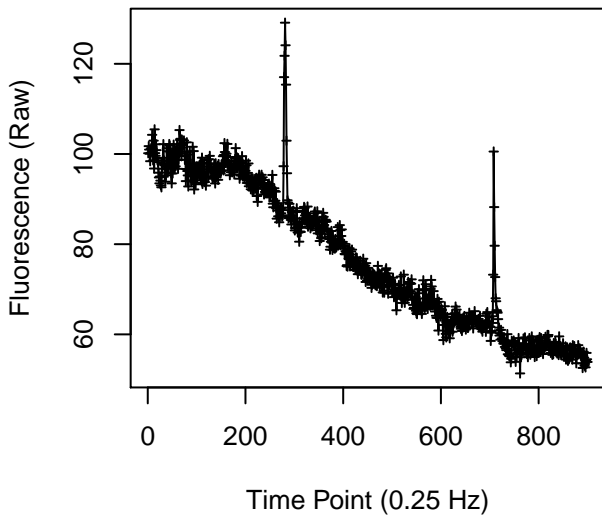

**Cell 2636**

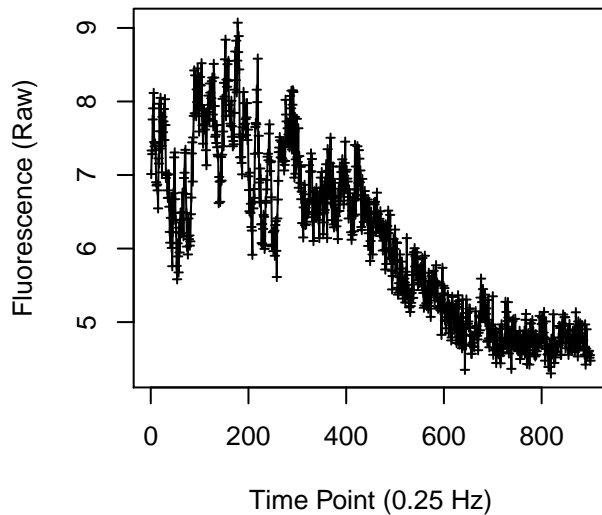

**Cell 2637**

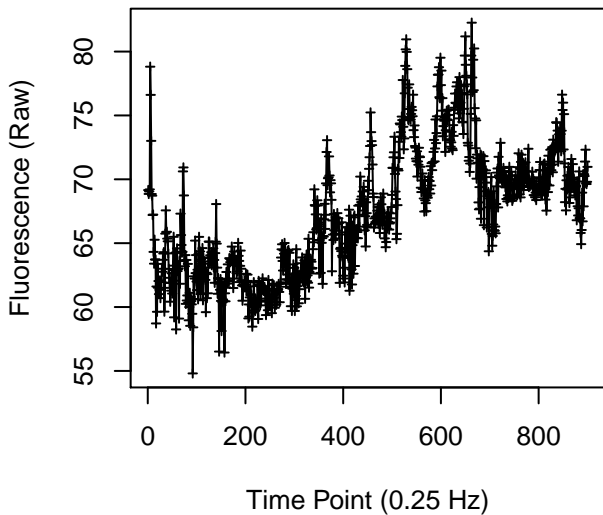

**Cell 2638**

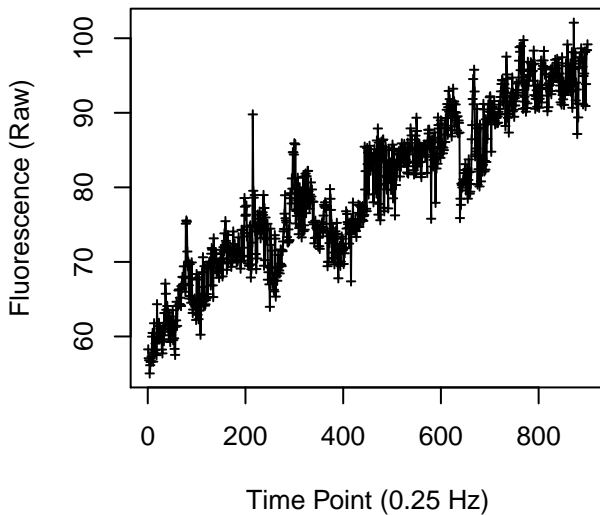

**Cell 2639**

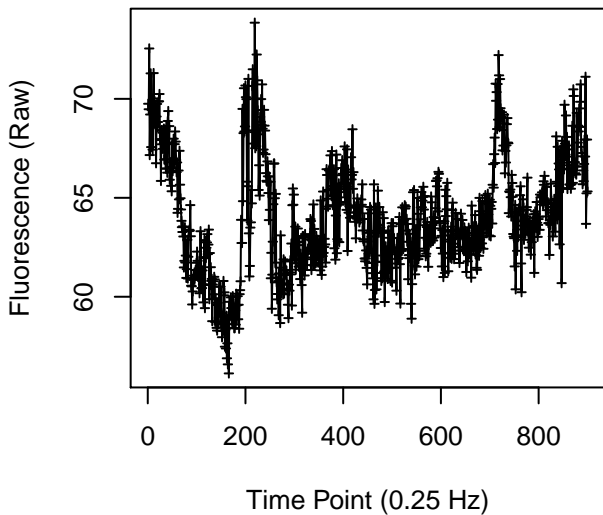

**Cell 2640**

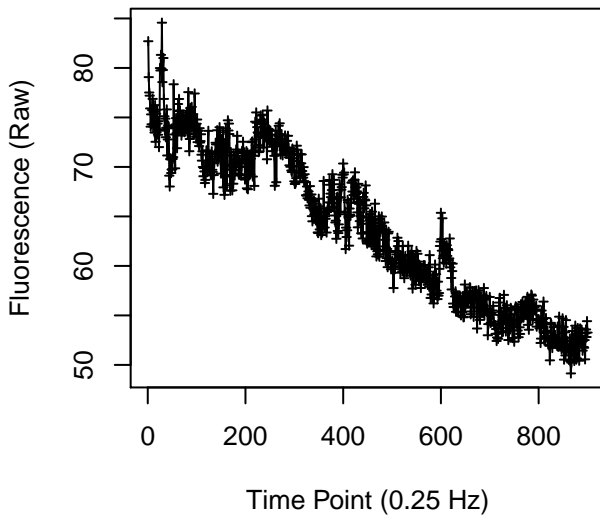

**Cell 2641**

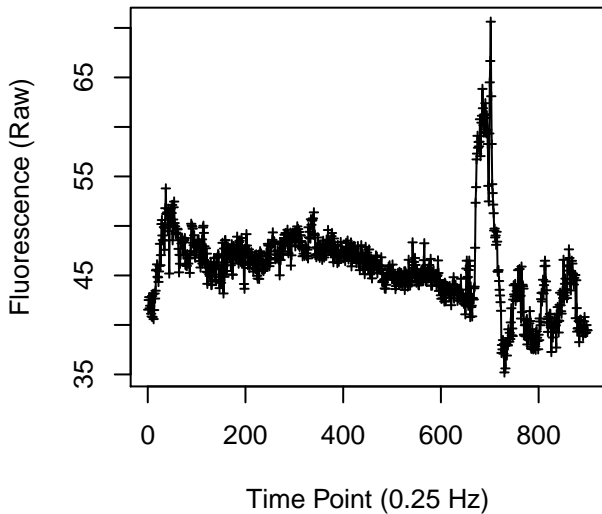

**Cell 2642**

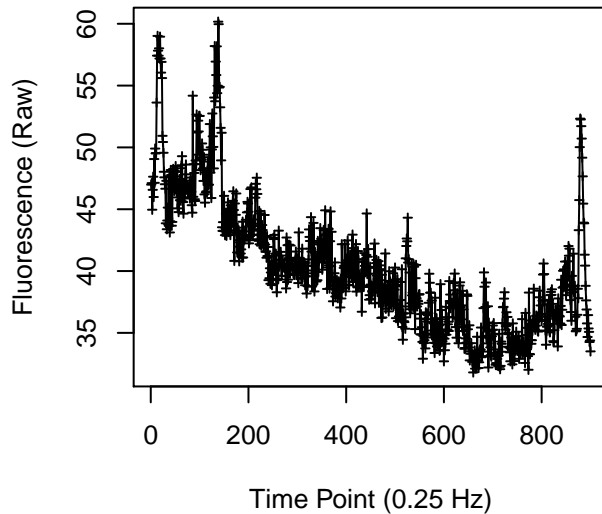

**Cell 2643**

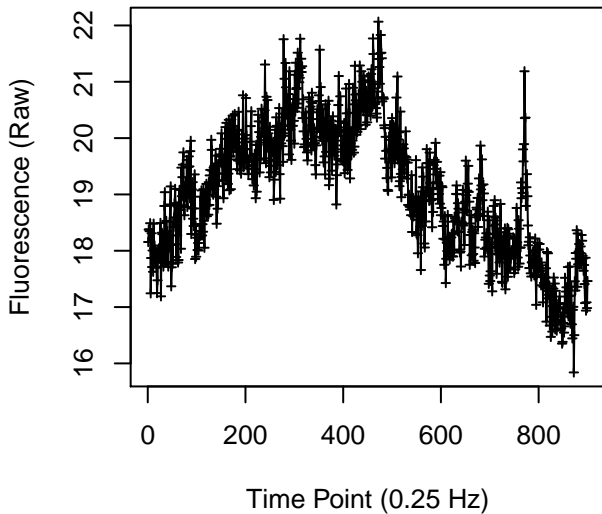

**Cell 2644**

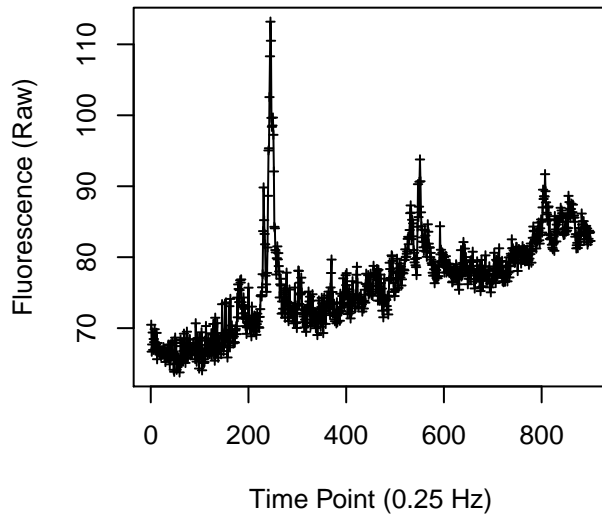

**Cell 2645**

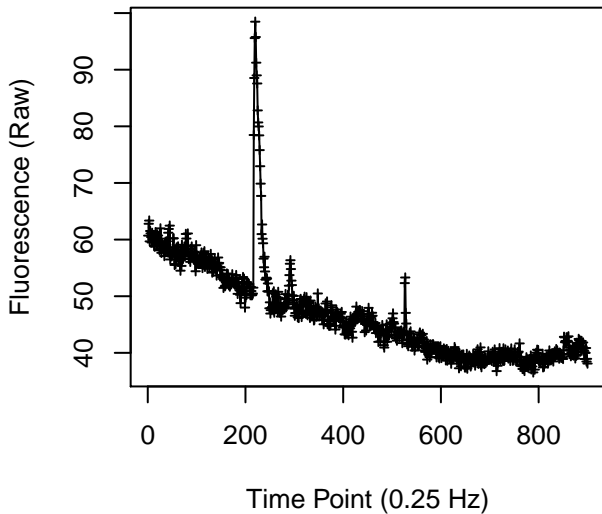

**Cell 2646**

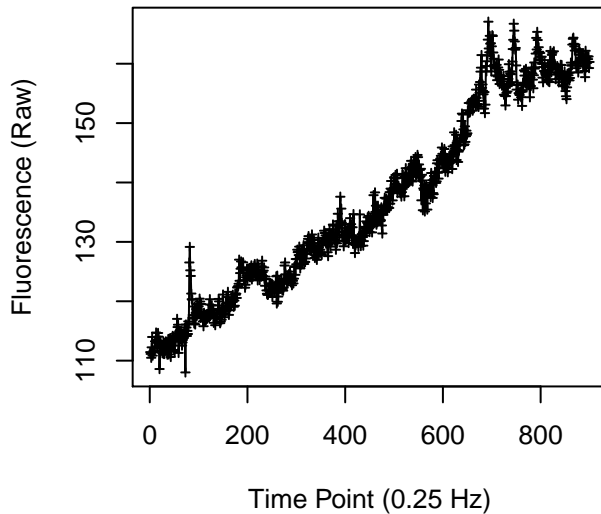

**Cell 2647**

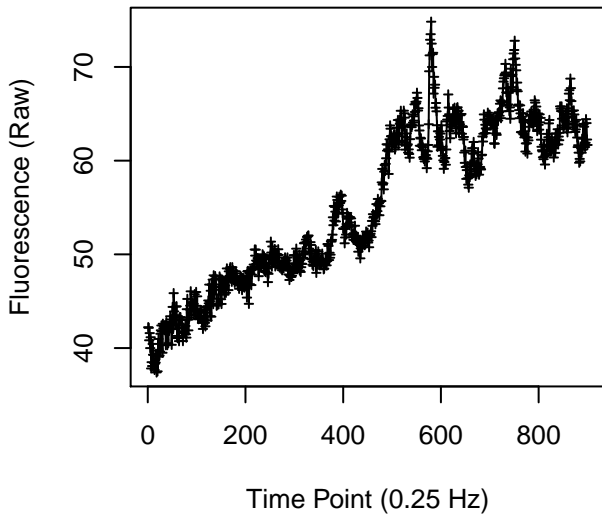

**Cell 2648**

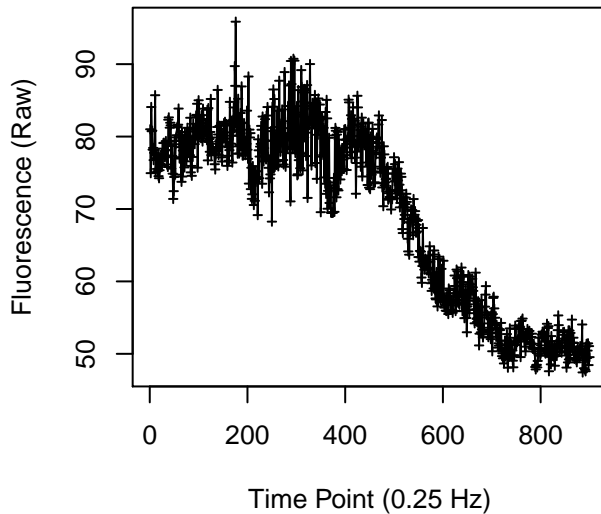

**Cell 2649**

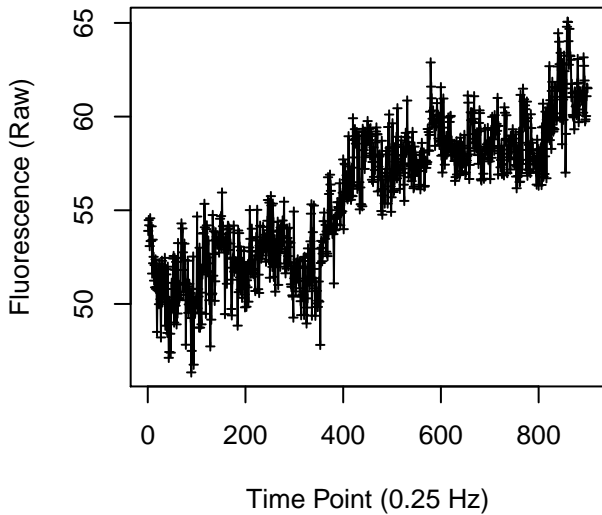

**Cell 2650**

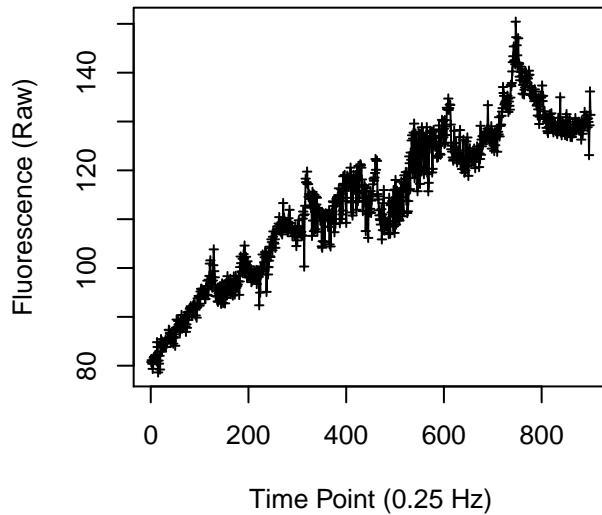

**Cell 2651**

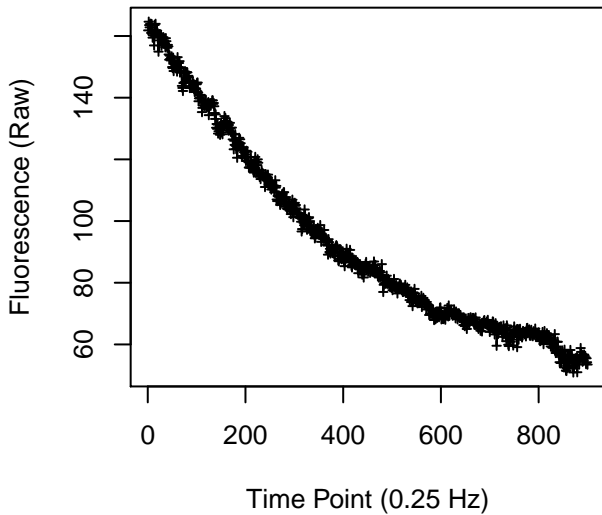

**Cell 2652**

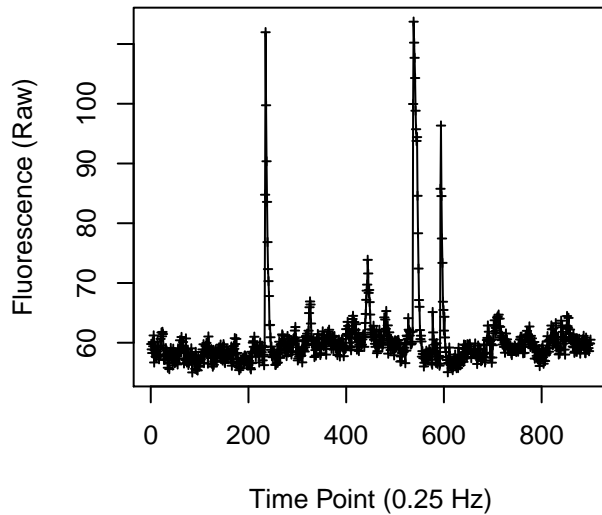

**Cell 2653**

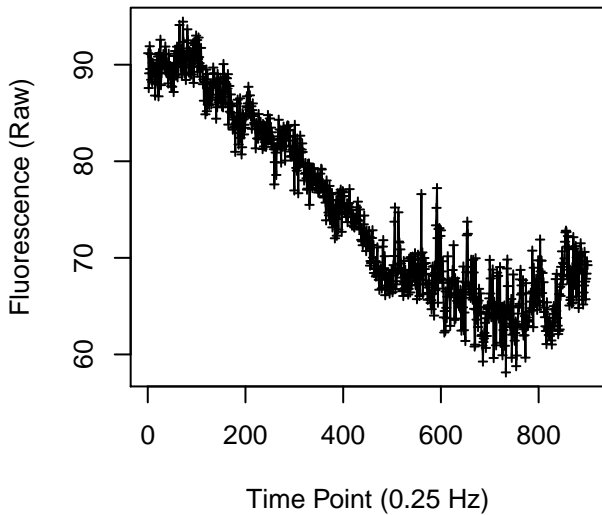

**Cell 2654**

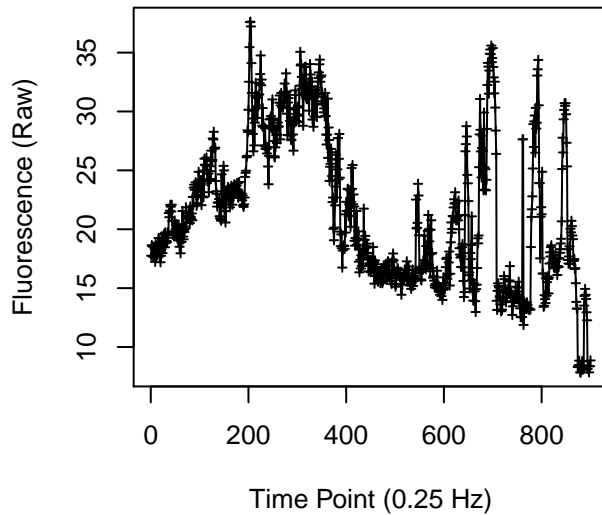

**Cell 2655**

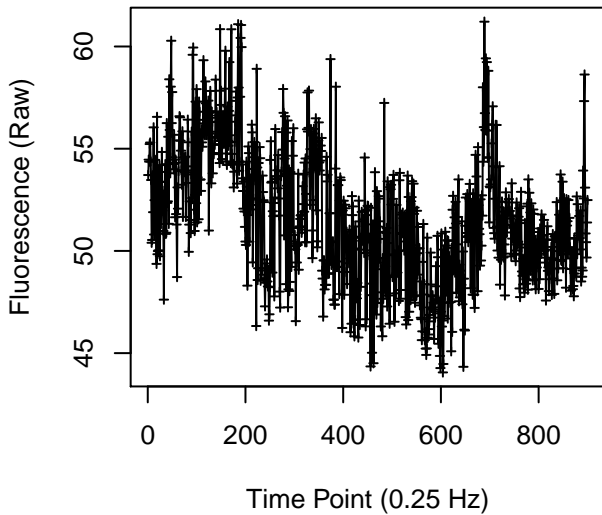

**Cell 2656**

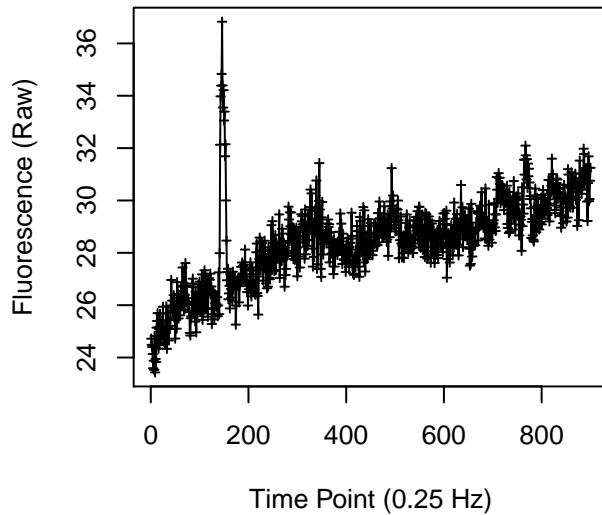

**Cell 2657**

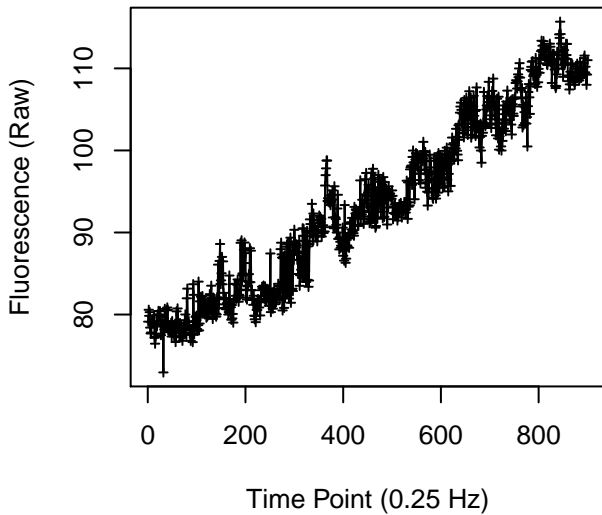

**Cell 2658**

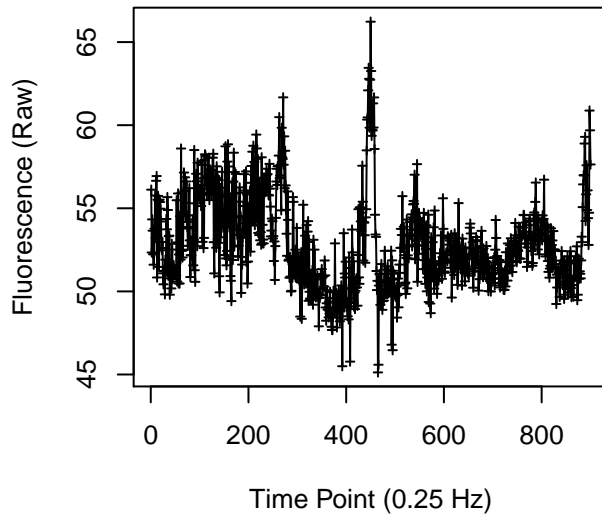

**Cell 2659**

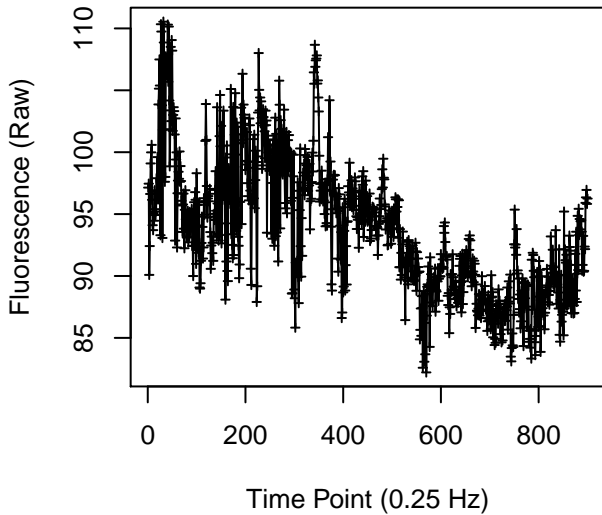

**Cell 2660**

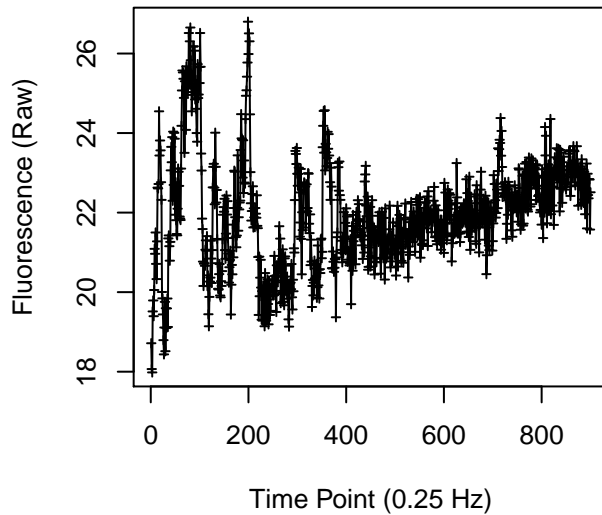

**Cell 2661**

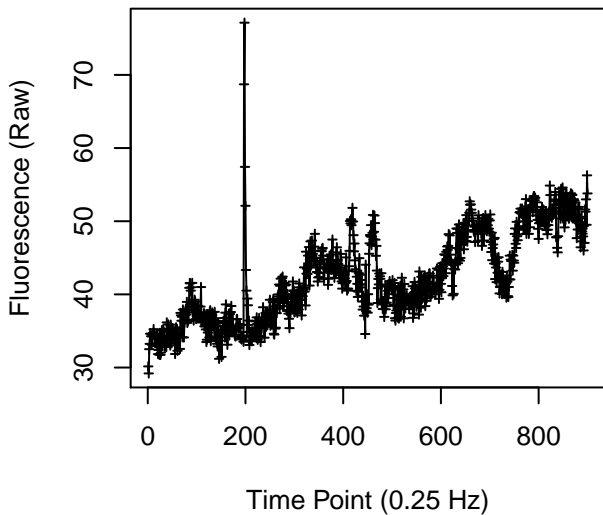

**Cell 2662**

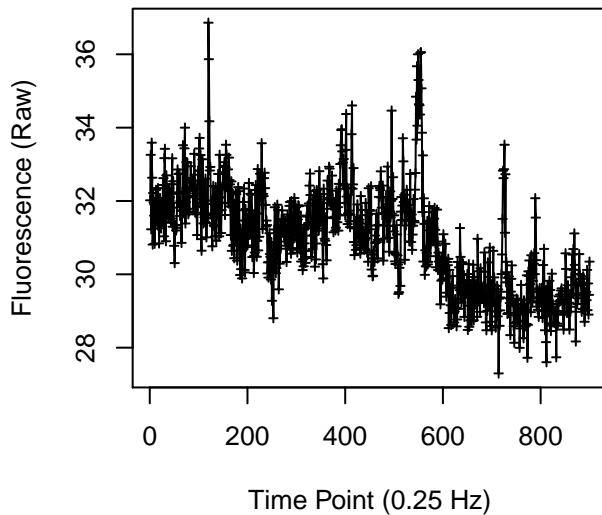

**Cell 2663**

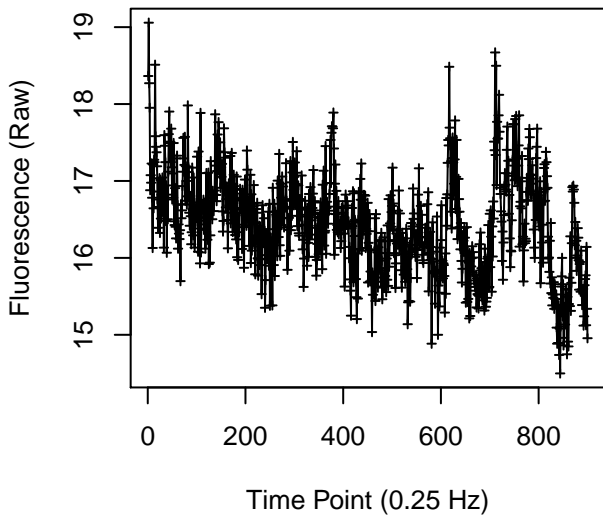

**Cell 2664**

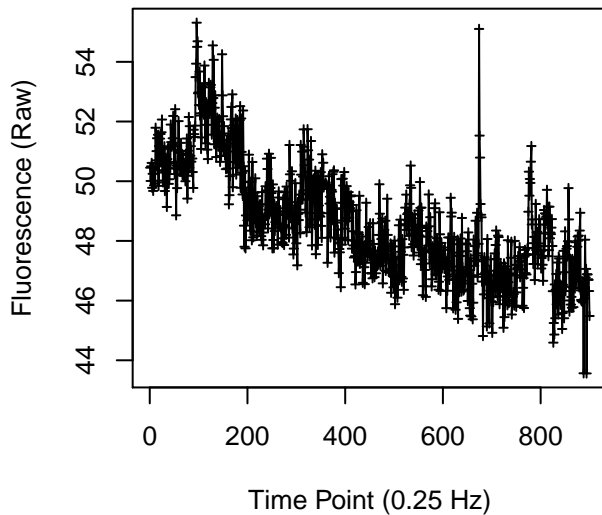

Supplement: S12 (10.1371/journal.pone.0168342.s012) [file journal.pone.0168342.s012.pdf]
