# Supplementary material for: A Markovian Entropy Measure for the Analysis of Calcium Activity Time Series
Source: PLoS One. 2016 Dec 15;11(12):e0168342. doi: 10.1371/journal.pone.0168342 (PMC5158058; doi:10.1371/journal.pone.0168342)
Supplement: S2 Table — Cohen’s d values [29] corresponding to Fig 3 of the main text, comparing the effect size between distributions of markovian entropy values for cellular calcium activity of stage 14 and stage 18 Xenopus laevis embryos, stage 18 and stage 22 Xenopus laevis embryos, stage 14 and stage 22 Xenopus laevis embryos, and mature retrotrapezoid nucleus neurons from embryonic mice in pH 7.4 solution vs. pH 7.2 solution (retrotrapezoid nucleus neuron data obtained from [15]). At large values of n and k, a sign change in d value occurs which is a technical artifact arising from there being more entries in the transition matrix than can be filled by data from our time series. (XLSX) [file pone.0168342.s007.xlsx]

## Sheet: Sheet1
Xenopus: stage 14 vs stage 18								Xenopus: stage 18 vs stage 22
	k = 1	k = 2	k = 3	k = 4	k = 5	k = 6			k = 1	k = 2	k = 3	k = 4	k = 5	k = 6
n = 2	0.521763	0.570348	0.579738	0.550343	0.518506	0.538706		n = 2	1.20866	1.22307	1.2245	1.20427	1.21854	1.2747
n = 3	0.535196	0.511754	0.496804	0.555558	0.62374	0.611429		n = 3	1.23518	1.18672	1.21967	1.24434	1.20252	1.20026
n = 4	0.532798	0.504279	0.548297	0.622047	0.534491	-0.487091		n = 4	1.22178	1.20364	1.2385	1.21116	1.13706	-0.53568
n = 5	0.52925	0.509205	0.586821	0.57533	-0.467547	-0.585847		n = 5	1.22024	1.21294	1.2357	1.18836	-0.4724	-1.2125
n = 6	0.522059	0.509714	0.588521	0.365636	-0.559754	-0.5589		n = 6	1.21157	1.21854	1.23291	0.789421	-1.196	-1.24626
Xenopus: stage 14 vs stage 22								RN Neurons: pH 7.4 vs pH 7.2
	k = 1	k = 2	k = 3	k = 4	k = 5	k = 6			k = 1	k = 2	k = 3	k = 4	k = 5	k = 6	k = 7
n = 2	2.13387	2.13257	2.06402	1.97843	1.98528	2.17491		n = 2	0.412528	0.659836	0.693238	0.736249	0.748587	0.739953	0.69929
n = 3	2.17721	2.04432	2.08801	2.19279	2.14745	2.12767		n = 3	0.361833	0.545352	0.580473	0.55198	0.527041	0.527353	0.539496
n = 4	2.14756	2.07511	2.18115	2.1732	1.99507	-1.07001		n = 4	0.348668	0.527832	0.516357	0.500373	0.525341	0.554937	0.561984
n = 5	2.12871	2.10214	2.19478	2.1208	-0.982888	-2.10162		n = 5	0.325091	0.477373	0.464932	0.483544	0.536997	0.553591	0.092512
n = 6	2.11149	2.10963	2.20616	1.32039	-2.04924	-2.17191		n = 6	0.333097	0.46325	0.452268	0.500629	0.583218	0.153342	-0.490146
								n = 7	0.330852	0.436126	0.439271	0.560818	0.452459	-0.392403	-0.628789
								n = 8	0.338447	0.441047	0.482681	0.608117	-0.115292	-0.640853	-0.73061
